# Supplementary material for: The Global research of protein post-translational modifications in the cancer field: A bibliometric and visualized study
Source: Frontiers journal article supplement (doi:10.3389/fonc.2022.978464), 2022-11-03
Supplement: Data_Sheet_1.zip [file Data Sheet 1.DOC]

label replace by

cancer-cells cancer cells

biomarker biomarkers

breast-cancer breast cancer

breast-cancer cells breast cancer

cell-cycle cell cycle

colorectal-cancer colorectal cancer

dna-damage dna damage

epigenetics epigenetic

gene-expression gene expression

histone deacetylase inhibitors histone deacetylase inhibitor

histone modifications histone modification

inhibitors inhibitor

mass-spectrometry mass spectrometry

mechanisms mechanism

nf-kappa-b nf-kappa b

pathways pathway

peptides peptide

post-translational modification (ptm) post-translational modification

post-translational modifications post-translational modification

posttranslational modification post-translational modification

posttranslational modifications post-translational modification

Post-translational modifications post-translational modification

prostate-cancer prostate cancer

protein-protein interactions protein-protein interaction

signal-transduction signal transduction

signaling pathways signaling pathway

small-molecule inhibitors small-molecule inhibitor

targets target

transcription factors transcription factor

tumor-suppressor genes tumor-suppressor gene

ubiquitylation ubiquitination

sumo sumoylation

ubiquitin ubiquitination

taiwan china

microrna mirna

peoples r china china

harvard med sch harvard univ
