# Supplementary material for: The Global research of protein post-translational modifications in the cancer field: A bibliometric and visualized study
Source: Frontiers journal article supplement (doi:10.3389/fonc.2022.978464), 2022-11-03
Supplement: Data_Sheet_1.zip [file Editorial 1.DOC]

FN Clarivate Analytics Web of Science
VR 1.0
PT J
AU Malla, RR
   Vempati, RK
AF Malla, Rama Rao
   Vempati, Rahul Kumar
TI Talin: A Potential Drug Target for Cancer Therapy
SO CURRENT DRUG METABOLISM
LA English
DT Review
DE Cancer; extra cellular matrix; focal adhesions; post translational
   modifications; talin; knock out
ID PHOSPHATIDYLINOSITOL PHOSPHATE KINASE; FOCAL ADHESION; I-GAMMA; INTEGRIN
   ACTIVATION; STRUCTURAL BASIS; CELL-MIGRATION; PHOSPHORYLATION; BINDING;
   PROTEIN; DOMAIN
AB Talin is an intracellular cytoskeletal protein and one of the major components of the focal adhesion complex. It mainly acts as an interlink between transmembrane integrin receptors and cytosolic F-actin. Apart from integrins and actin, it also interacts with various other proteins in the adhesion complex to regulate their functional dynamics. Talin undergoes a variety of post-translational modification and they are implicated in the control of cell motility. There are two talin isoforms (talin1 and talin2) in mammals and they are encoded by TLN1 and TLN2 genes, respectively. Recent studies showed that both the isoforms have some mechanistic dissimilarities in terms of their interaction with membrane-bound integrins. Among the two isoforms, talin1 was well studied, and most of the information available till now comes from talin1. The present review is aimed to provide an updated overview on the cellular significance of talin in normal and cancerous cells.
C1 [Malla, Rama Rao; Vempati, Rahul Kumar] Deemed Be Univ, GITAM Univ, Dept Biochem & Bioinformat, Canc Biol Lab,Inst Sci, Visakhapatnam, Andhra Pradesh, India.
RP Vempati, RK (corresponding author), Deemed Be Univ, GI TAM Univ, Dept Biochem & Bioinformat, Canc Biol Lab,Inst Sci, Visakhapatnam 600025, Andhra Pradesh, India.
EM rahulvbio@gmail.com
RI Malla, Rama/E-2438-2019
OI Malla, Rama/0000-0003-2448-1681
FU Indian Council of Medical Research, Government of IndiaIndian Council of
   Medical Research (ICMR) [5/13/04/2014-NCD-III]
FX This study was funded by Indian Council of Medical Research, Government
   of India (Sanction No. 5/13/04/2014-NCD-III).
CR Atherton P, 2015, NAT COMMUN, V6, DOI 10.1038/ncomms10038
   Bostanci O, 2014, EUR REV MED PHARMACO, V18, P2533
   Bouaouina M, 2012, J BIOL CHEM, V287, P6979, DOI 10.1074/jbc.M111.330845
   BURRIDGE K, 1983, J CELL BIOL, V97, P359, DOI 10.1083/jcb.97.2.359
   Calderwood DA, 1999, J BIOL CHEM, V274, P28071, DOI 10.1074/jbc.274.40.28071
   Calderwood DA, 2004, BIOCHEM SOC T, V32, P434, DOI 10.1042/BST0320434
   Calderwood DA, 2002, J BIOL CHEM, V277, P21749, DOI 10.1074/jbc.M111996200
   Calderwood DA, 2013, NAT REV MOL CELL BIO, V14, P503, DOI 10.1038/nrm3624
   Carisey A, 2013, CURR BIOL, V23, P271, DOI 10.1016/j.cub.2013.01.009
   Chen PJ, 2017, CANCER SCI, V108, P1157, DOI 10.1111/cas.13247
   Chen P, 2017, ONCOTARGET, V8, P13003, DOI 10.18632/oncotarget.14674
   Chinthalapudi K, 2018, P NATL ACAD SCI USA, V115, P10339, DOI 10.1073/pnas.1806275115
   Critchley DR, 2008, J CELL SCI, V121, P1345, DOI 10.1242/jcs.018085
   Critchley DR, 2009, ANNU REV BIOPHYS, V38, P235, DOI 10.1146/annurev.biophys.050708.133744
   de Pereda JM, 2005, J BIOL CHEM, V280, P8381, DOI 10.1074/jbc.M413180200
   DECLUE JE, 1987, MOL CELL BIOL, V7, P371, DOI 10.1128/MCB.7.1.371
   Ellis SJ, 2014, PLOS GENET, V10, DOI 10.1371/journal.pgen.1004756
   Ellis SJ, 2011, J CELL SCI, V124, P1844, DOI 10.1242/jcs.083337
   Fang KP, 2016, BMC CANCER, V16, DOI 10.1186/s12885-016-2076-9
   Friedl P, 2003, NAT REV CANCER, V3, P362, DOI 10.1038/nrc1075
   Gingras AR, 2008, EMBO J, V27, P458, DOI 10.1038/sj.emboj.7601965
   Gough RE, 2018, FEBS LETT, V592, P2108, DOI 10.1002/1873-3468.13081
   Gunawan M, 2015, NAT IMMUNOL, V16, P505, DOI 10.1038/ni.3125
   Haining AWM, 2016, ACS NANO, V10, P6648, DOI 10.1021/acsnano.6b01658
   Hirata H, 2014, AM J PHYSIOL-CELL PH, V306, pC607, DOI 10.1152/ajpcell.00122.2013
   Huang C, 2009, NAT CELL BIOL, V11, P624, DOI 10.1038/ncb1868
   Huang ZY, 2018, EXP CELL RES, V370, P417, DOI 10.1016/j.yexcr.2018.07.005
   Humphries JD, 2007, J CELL BIOL, V179, P1043, DOI 10.1083/jcb.200703036
   Hytonen VP, 2008, PLOS COMPUT BIOL, V4, DOI 10.1371/journal.pcbi.0040024
   Jafari N, 2016, J BIOL CHEM, V291, P25729, DOI 10.1074/jbc.M116.742742
   Jevnikar Z, 2013, J BIOL CHEM, V288, P2201, DOI 10.1074/jbc.M112.436394
   Jin JK, 2015, ONCOGENE, V34, P1811, DOI 10.1038/onc.2014.116
   Kahner BN, 2012, PLOS ONE, V7, DOI 10.1371/journal.pone.0034056
   Kalli AC, 2013, PLOS COMPUT BIOL, V9, DOI 10.1371/journal.pcbi.1003316
   Kanamori H, 2011, ONCOLOGY-BASEL, V80, P406, DOI 10.1159/000330734
   Kim DH, 2013, CELL ADHES MIGR, V7, P293, DOI 10.4161/cam.24804
   Klapholz B, 2017, J CELL SCI, V130, P2435, DOI 10.1242/jcs.190991
   Lai MT, 2011, J PATHOL, V224, P367, DOI 10.1002/path.2867
   Lee HS, 2009, J BIOL CHEM, V284, P5119, DOI 10.1074/jbc.M807117200
   Lee SY, 2005, J CELL BIOL, V168, P789, DOI 10.1083/jcb.200409028
   Li LQ, 2017, ONCOTARGET, V8, P106876, DOI 10.18632/oncotarget.22449
   Li X, 2013, J CELL SCI, V126, P2617, DOI 10.1242/jcs.117044
   Liang EI, 2017, INTEGR BIOL-UK, V9, P145, DOI 10.1039/c6ib00193a
   Liang YF, 2018, ONCOL LETT, V16, P285, DOI 10.3892/ol.2018.8641
   Ling K, 2003, J CELL BIOL, V163, P1339, DOI 10.1083/jcb.200310067
   MOLONY L, 1987, J BIOL CHEM, V262, P7790
   Mykuliak VV, 2018, PLOS COMPUT BIOL, V14, DOI 10.1371/journal.pcbi.1006126
   Nagano Makoto, 2012, Int J Cell Biol, V2012, P310616, DOI 10.1155/2012/310616
   Le OTT, 2015, BBA-MOL CELL RES, V1853, P2432, DOI 10.1016/j.bbamcr.2015.07.001
   PASQUALE EB, 1986, P NATL ACAD SCI USA, V83, P5507, DOI 10.1073/pnas.83.15.5507
   Pelham RJ, 1997, P NATL ACAD SCI USA, V94, P13661, DOI 10.1073/pnas.94.25.13661
   Priddle H, 1998, J CELL BIOL, V142, P1121, DOI 10.1083/jcb.142.4.1121
   Rahikainen R, 2019, J CELL SCI, V132, DOI 10.1242/jcs.226514
   Ratnikov B, 2005, J CELL SCI, V118, P4921, DOI 10.1242/jcs.02682
   Ratnikov BI, 2005, J THROMB HAEMOST, V3, P1783, DOI 10.1111/j.1538-7836.2005.01362.x
   Sen S, 2012, J R SOC INTERFACE, V9, P1311, DOI 10.1098/rsif.2011.0567
   Slater M, 2007, APPL IMMUNOHISTO M M, V15, P170, DOI 10.1097/01.pai.0000194762.78889.26
   Stuelten CH, 2018, NAT REV CANCER, V18, P296, DOI 10.1038/nrc.2018.15
   Theodosiou M, 2016, ELIFE, V5, DOI 10.7554/eLife.10130
   TIDBALL JG, 1993, J CELL BIOL, V123, P627, DOI 10.1083/jcb.123.3.627
   Webb DJ, 2002, NAT CELL BIOL, V4, pE97, DOI 10.1038/ncb0402-e97
   Wegener KL, 2007, CELL, V128, P171, DOI 10.1016/j.cell.2006.10.048
   Wen ZW, 2019, ONCOL LETT, V17, P4835, DOI 10.3892/ol.2019.10175
   Wu CY, 2007, CELL ADHES MIGR, V1, P13
   Xu N, 2016, MEDICINE, V95, DOI 10.1097/MD.0000000000004326
   Yan J, 2015, CELL MOL BIOENG, V8, P151, DOI 10.1007/s12195-014-0364-5
   Yao MX, 2016, NAT COMMUN, V7, DOI 10.1038/ncomms11966
   Yao MX, 2014, SCI REP-UK, V4, DOI 10.1038/srep04610
   Yates LA, 2012, J BIOL CHEM, V287, DOI 10.1074/jbc.M112.415208
   Ye X, 2016, BIOCHEMISTRY-US, V55, P5038, DOI 10.1021/acs.biochem.6b00497
   Yilmaz M, 2010, MOL CANCER RES, V8, P629, DOI 10.1158/1541-7786.MCR-10-0139
   Yuan YX, 2017, SCI REP-UK, V7, DOI 10.1038/srep41989
NR 72
TC 8
Z9 8
U1 0
U2 8
PU BENTHAM SCIENCE PUBL LTD
PI SHARJAH
PA EXECUTIVE STE Y-2, PO BOX 7917, SAIF ZONE, 1200 BR SHARJAH, U ARAB
   EMIRATES
SN 1389-2002
EI 1875-5453
J9 CURR DRUG METAB
JI Curr. Drug Metab.
PY 2020
VL 21
IS 1
BP 25
EP 32
DI 10.2174/1389200221666200214114018
PG 8
WC Biochemistry & Molecular Biology; Pharmacology & Pharmacy
WE Science Citation Index Expanded (SCI-EXPANDED)
SC Biochemistry & Molecular Biology; Pharmacology & Pharmacy
GA LO4TN
UT WOS:000533622300005
PM 32056520
DA 2022-04-10
ER

PT J
AU Narang, H
   Dhariwala, FA
   Krishna, M
AF Narang, Himanshi
   Dhariwala, Fatema A.
   Krishna, Malini
TI Effect of nitric oxide donor and gamma irradiation on modifications of
   ERK and JNK in murine peritoneal macrophages
SO JOURNAL OF CELL COMMUNICATION AND SIGNALING
LA English
DT Article
DE Sodium Nitroprusside (SNP); Radiation, Mitogen Activated Protein Kinase
   (MAPK); Macrophages and post translational modifications
ID ACTIVATED PROTEIN-KINASE; C-JUN; TYROSINE PHOSPHORYLATION; INDUCED
   APOPTOSIS; MAP-KINASES; MEDIATED APOPTOSIS; S-NITROSYLATION; NITRATION;
   PEROXYNITRITE; PATHWAY
AB Mitogen activated protein kinases (MAPKs) play an important role in activation, differentiation and proliferation of macrophages. Macrophages, upon activation, produce large amounts of nitric oxide that inhibit the growth of variety of microorganisms and tumor cells. This nitric oxide which is known to interfere with tyrosine phosphorylation may result in changes in the pattern of activation of MAPKs. In a previous study we have found that tyrosine phosphorylation of MAPKs was completely abolished in the presence of nitric oxide donor and radiation but this did not affect the function of macrophages. In this study the other post translational modifications namely nitration and ubiquitination of JNK and ERK have been looked at. Both ERK and JNK were found to be nitrated. However, there was no increase in ubiquitination of ERK and JNK, indicating that ubiquitination, in this case was not a natural consequence of nitration and may serve in signaling. Additionally, when the nitration was extensive, phosphorylation was also inhibited. The activation of substrates of ERK and JNK were looked at to determine the consequences of such modifications. Inhibition of phosphorylation and extensive nitration of JNK did not prevent activation of its substrate, c-jun. This study indicates that ERK and JNK may be under regulation by different type of modifications in macrophages.
C1 [Narang, Himanshi; Dhariwala, Fatema A.; Krishna, Malini] Bhabha Atom Res Ctr, Radiat Biol & Hlth Sci Div, Bombay 400085, Maharashtra, India.
RP Krishna, M (corresponding author), Bhabha Atom Res Ctr, Radiat Biol & Hlth Sci Div, Bombay 400085, Maharashtra, India.
EM malini@barc.gov.in
CR ALBINA JE, 1993, J IMMUNOL, V150, P5080
   Azad N, 2006, J BIOL CHEM, V281, P34124, DOI 10.1074/jbc.M602551200
   Balafanova Z, 2002, J BIOL CHEM, V277, P15021, DOI 10.1074/jbc.M112451200
   Baldassare JJ, 1999, J IMMUNOL, V162, P5367
   Bernabe JC, 2001, EXP CELL RES, V269, P222, DOI 10.1006/excr.2001.5315
   Carter AB, 1999, AM J RESP CELL MOL, V20, P751, DOI 10.1165/ajrcmb.20.4.3420
   Carter S, 1998, ONCOGENE, V16, P2787, DOI 10.1038/sj.onc.1201802
   Cassina AM, 2000, J BIOL CHEM, V275, P21409, DOI 10.1074/jbc.M909978199
   Chan ED, 1999, CHEST, V116, p91S, DOI 10.1378/chest.116.suppl_1.91S
   Chanvorachote P, 2005, J BIOL CHEM, V280, P42044, DOI 10.1074/jbc.M510080200
   Chen BC, 1999, IMMUNOLOGY, V97, P124, DOI 10.1046/j.1365-2567.1999.00747.x
   Cobb MH, 1999, PROG BIOPHYS MOL BIO, V71, P479, DOI 10.1016/S0079-6107(98)00056-X
   Das D, 2000, FEBS LETT, V472, P50, DOI 10.1016/S0014-5793(00)01416-2
   Davis DW, 2000, J EXP MED, V192, P857, DOI 10.1084/jem.192.6.857
   Davis RJ, 2000, CELL, V103, P239, DOI 10.1016/S0092-8674(00)00116-1
   Deak M, 1998, EMBO J, V17, P4426, DOI 10.1093/emboj/17.15.4426
   Dent P, 2003, ONCOGENE, V22, P5885, DOI 10.1038/sj.onc.1206701
   Deora AA, 2000, BIOCHEMISTRY-US, V39, P9901, DOI 10.1021/bi992954b
   DERIJARD B, 1994, CELL, V76, P1025, DOI 10.1016/0092-8674(94)90380-8
   Di Fiore PP, 2003, NAT REV MOL CELL BIO, V4, P491, DOI 10.1038/nrm1124
   Di Stasi AMM, 1999, J NEUROCHEM, V73, P727
   Faris M, 1998, J IMMUNOL, V160, P134
   GEPPERT TD, 1994, MOL MED, V1, P93
   Gow AJ, 1996, FEBS LETT, V385, P63, DOI 10.1016/0014-5793(96)00347-X
   Hellberg CB, 1998, BIOCHEM BIOPH RES CO, V252, P313, DOI 10.1006/bbrc.1998.9581
   HIBI M, 1993, GENE DEV, V7, P2135, DOI 10.1101/gad.7.11.2135
   Hu XT, 2000, CELL GROWTH DIFFER, V11, P191
   Ischiropoulos H, 2003, BIOCHEM BIOPH RES CO, V305, P776, DOI 10.1016/S0006-291X(03)00814-3
   Jaffrey SR, 2001, NAT CELL BIOL, V3, P193, DOI 10.1038/35055104
   Karin M, 1997, CURR OPIN CELL BIOL, V9, P240, DOI 10.1016/S0955-0674(97)80068-3
   Kong SK, 1996, P NATL ACAD SCI USA, V93, P3377, DOI 10.1073/pnas.93.8.3377
   Kovalovsky D, 2000, J NEUROIMMUNOL, V109, P23, DOI 10.1016/S0165-5728(00)00298-8
   Kugler S, 1997, FEMS MICROBIOL LETT, V157, P131
   Kurosawa M, 2000, AM J PHYSIOL-CELL PH, V278, pC500, DOI 10.1152/ajpcell.2000.278.3.C500
   Laine Aaron, 2005, Sci STKE, V2005, pre5, DOI 10.1126/stke.2812005re5
   Lane P, 2001, Sci STKE, V2001, pre1, DOI 10.1126/stke.2001.86.re1
   Leppa S, 1998, EMBO J, V17, P4404, DOI 10.1093/emboj/17.15.4404
   Li JR, 1997, BIOCHEM BIOPH RES CO, V240, P419, DOI 10.1006/bbrc.1997.7672
   MacMicking J, 1997, ANNU REV IMMUNOL, V15, P323, DOI 10.1146/annurev.immunol.15.1.323
   MacMillan-Crow LA, 2000, ARCH BIOCHEM BIOPHYS, V377, P350, DOI 10.1006/abbi.2000.1799
   Mallozzi C, 1999, FEBS LETT, V456, P201, DOI 10.1016/S0014-5793(99)00945-X
   Martin-Blanco E, 2000, BIOESSAYS, V22, P637, DOI 10.1002/1521-1878(200007)22:7<637::AID-BIES6>3.0.CO;2-E
   MESSMER UK, 1995, MOL PHARMACOL, V47, P757
   Mohr S, 1998, P NATL ACAD SCI USA, V95, P5045, DOI 10.1073/pnas.95.9.5045
   Mondoro TH, 1997, FREE RADICAL BIO MED, V22, P1055, DOI 10.1016/S0891-5849(96)00510-2
   Monteiro HP, 2000, FREE RADICAL BIO MED, V28, P174, DOI 10.1016/S0891-5849(99)00233-6
   Narang H, 2008, J CELL BIOCHEM, V103, P576, DOI 10.1002/jcb.21429
   Oliveira CJR, 2003, FREE RADICAL BIO MED, V35, P381, DOI 10.1016/S0891-5849(03)00311-3
   Poon RYC, 1996, J BIOL CHEM, V271, P13283, DOI 10.1074/jbc.271.22.13283
   Reardon DB, 1999, ONCOGENE, V18, P4756, DOI 10.1038/sj.onc.1202849
   Reiter CD, 2000, J BIOL CHEM, V275, P32460, DOI 10.1074/jbc.M910433199
   Schnell JD, 2003, J BIOL CHEM, V278, P35857, DOI 10.1074/jbc.R300018200
   Shaulian E, 2001, ONCOGENE, V20, P2390, DOI 10.1038/sj.onc.1204383
   Souza JM, 2003, ARCH BIOCHEM BIOPHYS, V380, P360
   Takakura K, 1999, ARCH BIOCHEM BIOPHYS, V369, P197, DOI 10.1006/abbi.1999.1374
   Vadseth C, 2004, J BIOL CHEM, V279, P8820, DOI 10.1074/jbc.M306101200
   Valledor AF, 2000, J BIOL CHEM, V275, P7403, DOI 10.1074/jbc.275.10.7403
   Vinciguerra M, 2004, J BIOL CHEM, V279, P9634, DOI 10.1074/jbc.M308721200
   Vrana JA, 1999, RADIAT RES, V151, P559, DOI 10.2307/3580032
   Yamakura F, 1998, J BIOL CHEM, V273, P14085, DOI 10.1074/jbc.273.23.14085
   Yang SH, 1998, EMBO J, V17, P1740, DOI 10.1093/emboj/17.6.1740
   Yoshioka Y, 2006, J PHARMACOL SCI, V101, P126, DOI 10.1254/jphs.FPJ06001X
   Yoshioka Y, 2006, J IMMUNOL, V176, P4675, DOI 10.4049/jimmunol.176.8.4675
   Zech B, 2003, BIOCHEM J, V371, P1055, DOI 10.1042/BJ20021720
   Zhang L, 2007, MOL CELL BIOL, V27, P2861, DOI 10.1128/MCB.02276-06
NR 65
TC 7
Z9 7
U1 0
U2 2
PU SPRINGER
PI DORDRECHT
PA VAN GODEWIJCKSTRAAT 30, 3311 GZ DORDRECHT, NETHERLANDS
SN 1873-9601
EI 1873-961X
J9 J CELL COMMUN SIGNAL
JI J. Cell Commun. Signal
PD DEC
PY 2007
VL 1
IS 3-4
BP 219
EP 226
DI 10.1007/s12079-008-0021-7
PG 8
WC Cell Biology
WE Science Citation Index Expanded (SCI-EXPANDED)
SC Cell Biology
GA V39NX
UT WOS:000209418800007
PM 18523870
OA Green Published, hybrid
DA 2022-04-10
ER

PT J
AU Chu, IM
   Hengst, L
   Slingerland, JM
AF Chu, Isabel M.
   Hengst, Ludger
   Slingerland, Joyce M.
TI The Cdk inhibitor p27 in human cancer: prognostic potential and
   relevance to anticancer therapy
SO NATURE REVIEWS CANCER
LA English
DT Review
ID CYCLIN-DEPENDENT-KINASE; GROWTH-FACTOR RECEPTOR; P27(KIP1)
   PROTEIN-LEVELS; SQUAMOUS-CELL CARCINOMA; LIGASE SUBUNIT SKP2; F-BOX
   PROTEIN; BREAST-CANCER; POOR-PROGNOSIS; SUBCELLULAR-LOCALIZATION;
   GENE-EXPRESSION
AB sThe cyclin-dependent kinase ( Cdk) inhibitor p27 ( also known as KIP1) regulates cell proliferation, cell motility and apoptosis. Interestingly, the protein can exert both positive and negative functions on these processes. Diverse post-translational modification determine the physiological role of p27. Phosphorylation regulates p27 binding to and inhibition of cyclin-Cdk complexes, its localization and its ubiquitin-mediated proteolysis. In cancers, p27 is inactivated through impaired synthesis, accelerated degradation and by mislocalization. Moreover, studies in several tumour types indicate that p27 expression levels have both prognostic and therapeutic implications.
C1 [Chu, Isabel M.; Slingerland, Joyce M.] Univ Miami, Miller Sch Med, Braman Family Breast Canc Inst, Miami, FL 33136 USA.
   [Chu, Isabel M.; Slingerland, Joyce M.] Univ Miami, Miller Sch Med, Dept Biochem & Mol Biol, Miami, FL 33136 USA.
   [Hengst, Ludger] Innsbruck Med Univ, Bioctr, Div Med Chem, A-6020 Innsbruck, Austria.
RP Slingerland, JM (corresponding author), Univ Miami, Miller Sch Med, Braman Family Breast Canc Inst, 1580 NW 10th Ave, Miami, FL 33136 USA.
EM jslingerland@med.miami.edu
OI Hengst, Ludger/0000-0002-0605-0223
FU NATIONAL CANCER INSTITUTEUnited States Department of Health & Human
   ServicesNational Institutes of Health (NIH) - USANIH National Cancer
   Institute (NCI) [R01CA105118] Funding Source: NIH RePORTER; NCI NIH
   HHSUnited States Department of Health & Human ServicesNational
   Institutes of Health (NIH) - USANIH National Cancer Institute (NCI)
   [1R01CA105118-01] Funding Source: Medline
CR Agrawal D, 1996, MOL CELL BIOL, V16, P4327
   Amann J, 2005, CANCER RES, V65, P226
   Anayama T, 1998, INT J CANCER, V79, P439, DOI 10.1002/(SICI)1097-0215(19980821)79:4<439::AID-IJC22>3.0.CO;2-Z
   Andreu EJ, 2005, CANCER RES, V65, P3264, DOI 10.1158/0008-5472.CAN-04-1357
   Arteaga CL, 2003, CLIN CANCER RES, V9, P1579
   Baekelandt M, 1999, CLIN CANCER RES, V5, P2848
   Baldassarre G, 2005, CANCER CELL, V7, P51, DOI 10.1016/j.ccr.2004.11.025
   Barbareschi M, 2000, INT J CANCER, V89, P236, DOI 10.1002/1097-0215(20000520)89:3<236::AID-IJC5>3.3.CO;2-Q
   Barnes A, 2003, J PATHOL, V201, P451, DOI 10.1002/path.1464
   Belluco C, 1999, ANN SURG ONCOL, V6, P19, DOI 10.1007/s10434-999-0019-2
   Besson A, 2006, GENE DEV, V20, P47, DOI 10.1101/gad.1384406
   Besson A, 2004, NAT REV CANCER, V4, P948, DOI 10.1038/nrc1501
   Besson A, 2007, GENE DEV, V21, P1731, DOI 10.1101/gad.1556607
   Bloom J, 2003, SEMIN CANCER BIOL, V13, P41, DOI 10.1016/S1044-579X(02)00098-6
   BOEHM M, 1921, EMBO J, V27, P3390
   Bondar T, 2006, MOL CELL BIOL, V26, P2531, DOI 10.1128/MCB.26.7.2531-2539.2006
   Busse D, 2000, J BIOL CHEM, V275, P6987, DOI 10.1074/jbc.275.10.6987
   Calin GA, 2005, NEW ENGL J MED, V353, P1793, DOI 10.1056/NEJMoa050995
   Cariou S, 2000, P NATL ACAD SCI USA, V97, P9042, DOI 10.1073/pnas.160016897
   Catzavelos C, 1997, NAT MED, V3, P227, DOI 10.1038/nm0297-227
   Catzavelos C, 1999, CANCER RES, V59, P684
   CHANG J, IN PRESS J NATL CANC
   Chappuis PO, 2000, J CLIN ONCOL, V18, P4045, DOI 10.1200/JCO.2000.18.24.4045
   Cheng JD, 1999, CLIN CANCER RES, V5, P1057
   Cheng MG, 1999, EMBO J, V18, P1571, DOI 10.1093/emboj/18.6.1571
   Cheng MG, 1998, P NATL ACAD SCI USA, V95, P1091, DOI 10.1073/pnas.95.3.1091
   Cheville JC, 1998, MODERN PATHOL, V11, P324
   Chiarle R, 2000, BLOOD, V95, P619, DOI 10.1182/blood.V95.2.619
   Cho SC, 2005, MOL CELL BIOL, V25, P1283, DOI 10.1128/MCB.25.4.1283-1297.2005
   Chu I, 2005, CANCER RES, V65, P18
   Chu I, 2007, CELL, V128, P281, DOI 10.1016/j.cell.2006.11.049
   Ciaparrone M, 1998, CANCER RES, V58, P114
   Connor MK, 2003, MOL BIOL CELL, V14, P201, DOI 10.1091/mbc.E02-06-0319
   Cordon-Cardo C, 1998, JNCI-J NATL CANCER I, V90, P1284, DOI 10.1093/jnci/90.17.1284
   Cote RJ, 1998, J NATL CANCER I, V90, P916, DOI 10.1093/jnci/90.12.916
   De Paola F, 2002, J PATHOL, V196, P26, DOI 10.1002/path.1011
   de Silanes IL, 2003, ONCOGENE, V22, P7146, DOI 10.1038/sj.onc.1206862
   Deng XB, 2004, J BIOL CHEM, V279, P22498, DOI 10.1074/jbc.M400479200
   Denicourt C, 2007, CANCER RES, V67, P9238, DOI 10.1158/0008-5472.CAN-07-1375
   Denkert C, 2004, CANCER RES, V64, P189, DOI 10.1158/0008-5472.CAN-03-1987
   Dijkers PF, 2000, MOL CELL BIOL, V20, P9138, DOI 10.1128/MCB.20.24.9138-9148.2000
   Donato NJ, 2003, BLOOD, V101, P690, DOI 10.1182/blood.V101.2.690
   Donovan JCH, 2001, J BIOL CHEM, V276, P40888, DOI 10.1074/jbc.M106448200
   Drobnjak M, 2003, CLIN CANCER RES, V9, P2613
   Erkinheimo TL, 2003, CANCER RES, V63, P7591
   Esposito V, 1997, CANCER RES, V57, P3381
   Fan GK, 1999, LARYNGOSCOPE, V109, P815, DOI 10.1097/00005537-199905000-00025
   Fontaniere S, 2006, FAM CANCER, V5, P49, DOI 10.1007/s10689-005-2575-3
   Foulkes WD, 2004, CANCER RES, V64, P830, DOI 10.1158/0008-5472.CAN-03-2970
   Freedland SJ, 2003, UROLOGY, V61, P1187, DOI 10.1016/S0090-4295(03)00034-7
   Freedland SJ, 2003, J UROLOGY, V169, P1325, DOI 10.1097/01.ju.0000054004.08958.f3
   Fujieda S, 1999, INT J CANCER, V84, P315, DOI 10.1002/(SICI)1097-0215(19990621)84:3<315::AID-IJC20>3.0.CO;2-U
   Fujita N, 2002, J BIOL CHEM, V277, P28706, DOI 10.1074/jbc.M203668200
   Fujita N, 2003, J BIOL CHEM, V278, P49254, DOI 10.1074/jbc.M306614200
   Galardi S, 2007, J BIOL CHEM, V282, P23716, DOI 10.1074/jbc.M701805200
   Galizia G, 2004, CLIN CANCER RES, V10, P3490, DOI 10.1158/1078-0432.CCR-0960-03
   Galizia G, 2004, DIS COLON RECTUM, V47, P1904, DOI 10.1007/s10350-004-0695-8
   Georgitsi M, 2007, BRIT J CANCER, V96, P352, DOI 10.1038/sj.bjc.6603573
   Gillett CE, 1999, J PATHOL, V187, P200, DOI 10.1002/(SICI)1096-9896(199901)187:2<200::AID-PATH228>3.0.CO;2-M
   Gonzalez T, 2003, J BIOL CHEM, V278, P12688, DOI 10.1074/jbc.M207530200
   Gopfert U, 2003, HUM MOL GENET, V12, P1767, DOI 10.1093/hmg/ddg177
   Grimmler M, 2007, CELL, V128, P269, DOI 10.1016/j.cell.2006.11.047
   Gstaiger M, 2001, P NATL ACAD SCI USA, V98, P5043, DOI 10.1073/pnas.081474898
   Han S, 2003, J SURG ONCOL, V83, P241, DOI 10.1002/jso.10268
   Han S, 1999, BREAST CANCER RES TR, V55, P161
   Hattori T, 2007, CANCER RES, V67, P10789, DOI 10.1158/0008-5472.CAN-07-2033
   Hauck L, 2008, NAT MED, V14, P315, DOI 10.1038/nm1729
   Hayashi H, 2001, LUNG CANCER-J IASLC, V34, P59, DOI 10.1016/S0169-5002(01)00211-2
   Hayes DF, 2005, J CLIN ONCOL, V23, P1596, DOI 10.1200/JCO.2005.10.074
   Hengst L, 1998, CURR TOP MICROBIOL, V227, P25
   Hengst L, 1996, SCIENCE, V271, P1861, DOI 10.1126/science.271.5257.1861
   Hershko D, 2001, CANCER, V91, P1745, DOI 10.1002/1097-0142(20010501)91:9<1745::AID-CNCR1193>3.0.CO;2-H
   Hirabayashi H, 2002, J SURG ONCOL, V81, P177, DOI 10.1002/jso.10176
   Hirsch FR, 2003, J CLIN ONCOL, V21, P3798, DOI 10.1200/JCO.2003.11.069
   Hommura F, 2000, CLIN CANCER RES, V6, P4073
   Huang YC, 2004, ONCOGENE, V23, P4856, DOI 10.1038/sj.onc.1207621
   Inoue T, 1999, J BIOL CHEM, V274, P32309, DOI 10.1074/jbc.274.45.32309
   Ishida N, 2002, J BIOL CHEM, V277, P14355, DOI 10.1074/jbc.C100762200
   Ishihara S, 1999, LUNG CANCER, V26, P187, DOI 10.1016/S0169-5002(99)00085-9
   Ishizawar R, 2004, CANCER CELL, V6, P209, DOI 10.1016/j.ccr.2004.09.001
   Itami A, 1999, ONCOLOGY-BASEL, V57, P311, DOI 10.1159/000012067
   JAMES M, 2007, MOL CELL BIOL
   JORDAN R, 1998, AM J PATHOL, V152, P1
   Kagawa Y, 2000, DIS ESOPHAGUS, V13, P179, DOI 10.1046/j.1442-2050.2000.00096.x
   Kardinal C, 2006, BLOOD, V107, P1133, DOI 10.1182/blood-2005-05-1771
   Karnik SK, 2005, P NATL ACAD SCI USA, V102, P14659, DOI 10.1073/pnas.0503484102
   Kedde M, 2007, CELL, V131, P1273, DOI 10.1016/j.cell.2007.11.034
   Keller UB, 2007, EMBO J, V26, P2562, DOI 10.1038/sj.emboj.7601691
   Kobayashi M, 2002, ONCOL REP, V9, P29
   Korkmaz H, 2005, AM J OTOLARYNG, V26, P77, DOI 10.1016/j.amjoto.2004.08.001
   Korkolopoulou P, 2002, GYNECOL ONCOL, V85, P404, DOI 10.1006/gyno.2002.6627
   Kossatz U, 2004, GENE DEV, V18, P2602, DOI 10.1101/gad.321004
   Kossatz U, 2006, EMBO J, V25, P5159, DOI 10.1038/sj.emboj.7601388
   Kotake Y, 2005, J BIOL CHEM, V280, P1095, DOI 10.1074/jbc.M406117200
   Kuczyk MA, 2001, ONCOL REP, V8, P1401
   Kudo Y, 2001, CANCER RES, V61, P7044
   Kullmann M, 2002, GENE DEV, V16, P3087, DOI 10.1101/gad.248902
   Kuo MYP, 2002, ORAL ONCOL, V38, P172, DOI 10.1016/S1368-8375(01)00041-0
   LaBaer J, 1997, GENE DEV, V11, P847, DOI 10.1101/gad.11.7.847
   Lane HA, 2000, MOL CELL BIOL, V20, P3210, DOI 10.1128/MCB.20.9.3210-3223.2000
   Langer R, 2006, J CLIN PATHOL, V59, P631, DOI 10.1136/jcp.2005.034298
   Latres E, 2001, P NATL ACAD SCI USA, V98, P2515, DOI 10.1073/pnas.041475098
   le Sage C, 2007, CELL CYCLE, V6, P2742, DOI 10.4161/cc.6.22.4900
   Leivonen M, 2001, BREAST CANCER RES TR, V67, P15, DOI 10.1023/A:1010623326118
   Li R, 2006, J UROLOGY, V175, P528, DOI 10.1016/S0022-5347(05)00151-5
   Liang J, 2002, NAT MED, V8, P1153, DOI 10.1038/nm761
   Liang JY, 2007, NAT CELL BIOL, V9, P218, DOI 10.1038/ncb1537
   Liang JY, 2003, CELL CYCLE, V2, P339, DOI 10.4161/cc.2.4.433
   Liu XD, 2000, ONCOGENE, V19, P5926, DOI 10.1038/sj.onc.1203991
   Loda M, 1997, NAT MED, V3, P231, DOI 10.1038/nm0297-231
   Lynch TJ, 2004, NEW ENGL J MED, V350, P2129, DOI 10.1056/NEJMoa040938
   Malek NP, 2001, NATURE, V413, P323, DOI 10.1038/35095083
   Manne U, 2004, CLIN CANCER RES, V10, P1743, DOI 10.1158/1078-0432.CCR-03-0037
   Masciullo V, 2000, CLIN CANCER RES, V6, P4816
   Massarelli E, 2005, CANCER-AM CANCER SOC, V103, P952, DOI 10.1002/cncr.20879
   Masuda T, 2002, CANCER RES, V62, P3819
   McAllister SS, 2003, MOL CELL BIOL, V23, P216, DOI 10.1128/MCB.23.1.216-228.2003
   Medema RH, 2000, NATURE, V404, P782, DOI 10.1038/35008115
   Millard SS, 2000, MOL CELL BIOL, V20, P5947, DOI 10.1128/MCB.20.16.5947-5959.2000
   Millard SS, 1997, J BIOL CHEM, V272, P7093, DOI 10.1074/jbc.272.11.7093
   Mineta H, 1999, CANCER-AM CANCER SOC, V85, P1011, DOI 10.1002/(SICI)1097-0142(19990301)85:5<1011::AID-CNCR1>3.0.CO;2-0
   Miskimins WK, 2001, MOL CELL BIOL, V21, P4960, DOI 10.1128/MCB.21.15.4960-4967.2001
   Moller MB, 1999, BRIT J HAEMATOL, V105, P730, DOI 10.1046/j.1365-2141.1999.01417.x
   Moriya T, 2000, MODERN PATHOL, V13, P13, DOI 10.1038/modpathol.3880004
   Motti ML, 2004, CELL CYCLE, V3, P1074
   Murata K, 2005, MOL CELL BIOL, V25, P4262, DOI 10.1128/MCB.25.10.4262-4271.2005
   Nagahara H, 1998, NAT MED, V4, P1449, DOI 10.1038/4042
   Nahta R, 2004, CANCER RES, V64, P3981, DOI 10.1158/0008-5472.CAN-03-3900
   Nakayama K, 2004, DEV CELL, V6, P661, DOI 10.1016/S1534-5807(04)00131-5
   Nakayama KI, 2006, NAT REV CANCER, V6, P369, DOI 10.1038/nrc1881
   Newcomb EW, 1999, AM J PATHOL, V154, P119, DOI 10.1016/S0002-9440(10)65258-3
   Newman L, 2001, MOL CARCINOGEN, V30, P169, DOI 10.1002/mc.1025
   Nigg EA, 1993, CURR OPIN CELL BIOL, V5, P187, DOI 10.1016/0955-0674(93)90101-U
   Noguchi T, 2003, ONCOL REP, V10, P827
   Nohara T, 2001, ONCOLOGY-BASEL, V60, P94, DOI 10.1159/000055303
   O'Hagan RC, 2000, GENE DEV, V14, P2185, DOI 10.1101/gad.827200
   Oh YL, 2001, PATHOL INT, V51, P94, DOI 10.1046/j.1440-1827.2001.01173.x
   Oka K, 2000, CANCER, V88, P2766, DOI 10.1002/1097-0142(20000615)88:12<2766::AID-CNCR15>3.0.CO;2-G
   Osborne CK, 1998, BREAST CANCER RES TR, V51, P227, DOI 10.1023/A:1006132427948
   Oshita F, 2000, ONCOL REP, V7, P491
   Palmqvist R, 1999, J PATHOL, V188, P18, DOI 10.1002/(SICI)1096-9896(199905)188:1<18::AID-PATH311>3.0.CO;2-T
   Pavletich NP, 1999, J MOL BIOL, V287, P821, DOI 10.1006/jmbi.1999.2640
   Pegram MD, 1998, BREAST CANCER RES TR, V52, P65, DOI 10.1023/A:1006111117877
   Pellegata NS, 2006, P NATL ACAD SCI USA, V103, P15558, DOI 10.1073/pnas.0603877103
   Pohl G, 2003, J CLIN ONCOL, V21, P3594, DOI 10.1200/JCO.2003.02.021
   Porter PL, 2006, J NATL CANCER I, V98, P1723, DOI 10.1093/jnci/djj467
   Porter PL, 1997, NAT MED, V3, P222, DOI 10.1038/nm0297-222
   Prall F, 2004, APPL IMMUNOHISTO M M, V12, P111
   Pruneri G, 1999, J CLIN ONCOL, V17, P3150, DOI 10.1200/JCO.1999.17.10.3150
   Psyrri A, 2005, CLIN CANCER RES, V11, P8384, DOI 10.1158/1078-0432.CCR-05-1270
   Reed W, 1999, VIRCHOWS ARCH, V435, P116, DOI 10.1007/s004280050408
   Rodier G, 2001, EMBO J, V20, P6672, DOI 10.1093/emboj/20.23.6672
   Rosati G, 2004, TUMOR BIOL, V25, P258, DOI 10.1159/000081389
   Rossi HA, 2002, CANCER J, V8, P268, DOI 10.1097/00130404-200205000-00011
   Russo AA, 1996, NATURE, V382, P325, DOI 10.1038/382325a0
   Sabile A, 2006, MOL CELL BIOL, V26, P5994, DOI 10.1128/MCB.01630-05
   Sarli L, 2006, SURG ONCOL, V15, P97, DOI 10.1016/j.suronc.2006.09.002
   Schmider-Ross A, 2006, J CANCER RES CLIN, V132, P163, DOI 10.1007/s00432-005-0057-5
   Sekimoto T, 2004, EMBO J, V23, P1934, DOI 10.1038/sj.emboj.7600198
   Shamma A, 2000, ONCOLOGY-BASEL, V58, P152, DOI 10.1159/000012092
   Shapira M, 2005, CANCER-AM CANCER SOC, V103, P1336, DOI 10.1002/cncr.20917
   Sherr CJ, 1999, GENE DEV, V13, P1501, DOI 10.1101/gad.13.12.1501
   Shin I, 2002, NAT MED, V8, P1145, DOI 10.1038/nm759
   Shin I, 2005, J BIOL CHEM, V280, P6055, DOI 10.1074/jbc.M412367200
   Shintani S, 2003, ONCOLOGY-BASEL, V65, P355, DOI 10.1159/000074649
   Signoretti S, 2002, J CLIN INVEST, V110, P633, DOI 10.1172/JCI200215795
   Singh SP, 1998, CANCER RES, V58, P1730
   Slamon DJ, 2001, NEW ENGL J MED, V344, P783, DOI 10.1056/NEJM200103153441101
   Slingerland J, 2000, J CELL PHYSIOL, V183, P10, DOI 10.1002/(SICI)1097-4652(200004)183:1<10::AID-JCP2>3.0.CO;2-I
   Soos TJ, 1996, CELL GROWTH DIFFER, V7, P135
   Spataro VJ, 2003, CANCER-AM CANCER SOC, V97, P1591, DOI 10.1002/cncr.11224
   Sui L, 2001, GYNECOL ONCOL, V83, P56, DOI 10.1006/gyno.2001.6308
   TAKAHASHI S, 2007, INT J CLIN ONCOL, V7, P349
   Tamura N, 2001, J LARYNGOL OTOL, V115, P400, DOI 10.1258/0022215011907749
   Tan P, 1997, CANCER RES, V57, P1259
   Tenjo T, 2000, ONCOLOGY-BASEL, V58, P45, DOI 10.1159/000012078
   Thomas GV, 2000, J UROLOGY, V164, P1987, DOI 10.1016/S0022-5347(05)66934-0
   Tomoda K, 1999, NATURE, V398, P160, DOI 10.1038/18230
   Trotman LC, 2006, NATURE, V441, P523, DOI 10.1038/nature04809
   Tsihlias J, 1999, ANNU REV MED, V50, P401
   Tsihlias J, 1998, CANCER RES, V58, P542
   Tsuchiya A, 1999, J SURG ONCOL, V70, P230, DOI 10.1002/(SICI)1096-9098(199904)70:4<230::AID-JSO6>3.0.CO;2-I
   Tsukamoto S, 2001, LUNG CANCER-J IASLC, V34, P83, DOI 10.1016/S0169-5002(01)00216-1
   Tsutsui S, 2005, CANCER-AM CANCER SOC, V104, P2048, DOI 10.1002/cncr.21471
   van't Veer LJ, 2005, J CLIN ONCOL, V23, P1631, DOI 10.1200/JCO.2005.12.005
   Venkatesan TK, 1999, LARYNGOSCOPE, V109, P1329, DOI 10.1097/00005537-199908000-00029
   Vidal A, 2002, J BIOL CHEM, V277, P16433, DOI 10.1074/jbc.M112090200
   Viglietto G, 2002, NAT MED, V8, P1136, DOI 10.1038/nm762
   Viglietto G, 2002, CELL CYCLE, V1, P394, DOI 10.4161/cc.1.6.263
   Vis AN, 2000, J UROLOGY, V164, P2156, DOI 10.1016/S0022-5347(05)66989-3
   Visone R, 2007, ENDOCR-RELAT CANCER, V14, P791, DOI 10.1677/ERC-07-0129
   Vivanco I, 2002, NAT REV CANCER, V2, P489, DOI 10.1038/nrc839
   Volinia S, 2006, P NATL ACAD SCI USA, V103, P2257, DOI 10.1073/pnas.0510565103
   Wang CG, 2005, J BIOL CHEM, V280, P12339, DOI 10.1074/jbc.C400536200
   Wang XH, 2002, J BIOL CHEM, V277, P44310, DOI 10.1074/jbc.M207510200
   Watson NFS, 2006, WORLD J GASTROENTERO, V12, P6299, DOI 10.3748/wjg.v12.i39.6299
   Wu FY, 2006, CANCER RES, V66, P2162, DOI 10.1158/0008-5472.CAN-05-3304
   Wu J, 1999, BRIT J CANCER, V79, P1572, DOI 10.1038/sj.bjc.6690250
   Wu JT, 2005, APPL IMMUNOHISTO M M, V13, P45, DOI 10.1097/00129039-200503000-00008
   Yang HL, 2005, ONCOGENE, V24, P1924, DOI 10.1038/sj.onc.1208352
   Yang HY, 2000, J BIOL CHEM, V275, P24735, DOI 10.1074/jbc.C000147200
   Yang RM, 1998, J UROLOGY, V159, P941, DOI 10.1016/S0022-5347(01)63776-5
   Yang W, 2001, ONCOGENE, V20, P1688, DOI 10.1038/sj.onc.1204245
   Yatabe Y, 1998, CANCER RES, V58, P1042
   Yokoi S, 2002, AM J PATHOL, V161, P207, DOI 10.1016/S0002-9440(10)64172-7
   Yoon A, 2006, SCIENCE, V312, P902, DOI 10.1126/science.1123835
   Zeng Y, 2000, BIOCHEM BIOPH RES CO, V274, P37, DOI 10.1006/bbrc.2000.3098
   ZHANG H, 1994, GENE DEV, V8, P1750, DOI 10.1101/gad.8.15.1750
   Zheng WQ, 2005, STEROIDS, V70, P770, DOI 10.1016/j.steroids.2005.04.012
NR 209
TC 738
Z9 763
U1 0
U2 81
PU NATURE PUBLISHING GROUP
PI LONDON
PA MACMILLAN BUILDING, 4 CRINAN ST, LONDON N1 9XW, ENGLAND
SN 1474-175X
EI 1474-1768
J9 NAT REV CANCER
JI Nat. Rev. Cancer
PD APR
PY 2008
VL 8
IS 4
BP 253
EP 267
DI 10.1038/nrc2347
PG 15
WC Oncology
WE Science Citation Index Expanded (SCI-EXPANDED)
SC Oncology
GA 276IC
UT WOS:000254133500014
PM 18354415
DA 2022-04-10
ER

PT J
AU Hirata, Y
   Katagiri, K
   Nagaoka, K
   Morishita, T
   Kudoh, Y
   Hatta, T
   Naguro, I
   Kano, K
   Udagawa, T
   Natsume, T
   Aoki, J
   Inada, T
   Noguchi, T
   Ichijo, H
   Matsuzawa, A
AF Hirata, Yusuke
   Katagiri, Kazumi
   Nagaoka, Keita
   Morishita, Tohru
   Kudoh, Yuki
   Hatta, Tomohisa
   Naguro, Isao
   Kano, Kuniyuki
   Udagawa, Tsuyoshi
   Natsume, Tohru
   Aoki, Junken
   Inada, Toshifumi
   Noguchi, Takuya
   Ichijo, Hidenori
   Matsuzawa, Atsushi
TI TRIM48 Promotes ASK1 Activation and Cell Death through
   Ubiquitination-Dependent Degradation of the ASK1-Negative Regulator
   PRMT1
SO CELL REPORTS
LA English
DT Article
ID ARGININE METHYLATION; OXIDATIVE STRESS; FAMILY PROTEINS; INNATE
   IMMUNITY; APOPTOSIS; THIOREDOXIN; RECRUITMENT; DYSTROPHY; PATHWAY;
   KINASE
AB Apoptosis signal-regulating kinase 1 (ASK1) is an oxidative stress-responsive kinase that is regulated by various interacting molecules and post-translational modification. However, how these molecules and modifications cooperatively regulate ASK1 activity remains largely unknown. Here, we showed that tripartite motif 48 (TRIM48) orchestrates the regulation of oxidative stress-induced ASK1 activation. A pull-down screen identified a TRIM48-interacting partner, protein arginine methyltransferase 1 (PRMT1), which negatively regulates ASK1 activation by enhancing its interaction with thioredoxin (Trx), another ASK1-negative regulator. TRIM48 facilitates ASK1 activation by promoting K48-linked polyubiquitination and degradation of PRMT1. TRIM48 knockdown suppressed oxidative stress-induced ASK1 activation and cell death, whereas forced expression promoted cancer cell death in mouse xenograft model. These results indicate that TRIM48 facilitates oxidative stress-induced ASK1 activation and cell death through ubiquitination-dependent degradation of PRMT1. This study provides a cell death mechanism fine-tuned by the crosstalk between enzymes that engage various types of post-translational modification.
C1 [Hirata, Yusuke; Nagaoka, Keita; Morishita, Tohru; Kudoh, Yuki; Noguchi, Takuya; Matsuzawa, Atsushi] Tohoku Univ, Grad Sch Pharmaceut Sci, Lab Hlth Chem, Sendai, Miyagi, Japan.
   [Katagiri, Kazumi; Naguro, Isao; Ichijo, Hidenori] Univ Tokyo, Grad Sch Pharmaceut Sci, Lab Cell Signaling, Tokyo, Japan.
   [Hatta, Tomohisa; Natsume, Tohru] Natl Inst Adv Ind Sci & Technol, Mol Profiling Res Ctr Drug Discovery, Tokyo, Japan.
   [Kano, Kuniyuki; Aoki, Junken] Tohoku Univ, Grad Sch Pharmaceut Sci, Lab Mol & Cellular Biochem, Sendai, Miyagi, Japan.
   [Udagawa, Tsuyoshi; Inada, Toshifumi] Tohoku Univ, Grad Sch Pharmaceut Sci, Lab Gene Regulat, Sendai, Miyagi, Japan.
RP Matsuzawa, A (corresponding author), Tohoku Univ, Grad Sch Pharmaceut Sci, Lab Hlth Chem, Sendai, Miyagi, Japan.
EM matsushi@m.tohoku.ac.jp
RI Natsume, Tohru/M-7627-2018; Naguro, Isao/P-1337-2019; Inada,
   Toshifumi/AAE-1517-2019; Noguchi, Takuya/T-6767-2019; Hirata,
   Yusuke/T-9580-2019
OI Natsume, Tohru/0000-0002-1510-2582; Noguchi, Takuya/0000-0001-6187-6645;
   Hirata, Yusuke/0000-0002-1428-2075; Naguro, Isao/0000-0002-0338-8026;
   Kano, Kuniyuki/0000-0002-4539-5750
FU Japan Society for the Promotion of Science (JSPS)Ministry of Education,
   Culture, Sports, Science and Technology, Japan (MEXT)Japan Society for
   the Promotion of Science; Japanese Ministry of Education, Culture,
   Sports, Science and Technology (MEXT)Ministry of Education, Culture,
   Sports, Science and Technology, Japan (MEXT); KAKENHI on Innovative
   Areas "Oxygen Biology: a new criterion for integrated understanding of
   life'' of MEXT [17H05518]; KAKENHI on Innovative Areas "New aspect of
   the ubiquitinationsystem: its enormous roles in protein regulation'' of MEXT
   [15H01168]; Mitsubishi Foundation; Shimabara Science Promotion
   Foundation; Japan Foundation of Applied EnzymologyJapan Foundation of
   Applied Enzymology; Life Science Foundation of JapanLife Science
   Foundation of Japan; Fugaku Trust for Medicinal Research; Takeda Science
   FoundationTakeda Science Foundation (TSF)
FX We thank all members of Lab of Health Chemistry for helpful discussions.
   This work was supported by Grant-in-Aid for Scientific Research
   (KAKENHI) from the Japan Society for the Promotion of Science (JSPS) and
   the Japanese Ministry of Education, Culture, Sports, Science and
   Technology (MEXT), including KAKENHI on Innovative Areas "Oxygen
   Biology: a new criterion for integrated understanding of life'' (No.
   17H05518) of MEXT and KAKENHI on Innovative Areas "New aspect of the
   ubiquitinationsystem: its enormous roles in protein regulation'' (No.
   15H01168) of MEXT, the Mitsubishi Foundation, the Shimabara Science
   Promotion Foundation, the Japan Foundation of Applied Enzymology, the
   Life Science Foundation of Japan, the Fugaku Trust for Medicinal
   Research, and the Takeda Science Foundation.
CR Bedford MT, 2009, MOL CELL, V33, P1, DOI 10.1016/j.molcel.2008.12.013
   Cho JH, 2012, CELL DEATH DIFFER, V19, P859, DOI 10.1038/cdd.2011.168
   Daxinger L, 2015, CURR OPIN GENET DEV, V33, P56, DOI 10.1016/j.gde.2015.08.007
   Ferri G, 2015, HUM MOL GENET, V24, P1256, DOI 10.1093/hmg/ddu536
   Fujino G, 2007, MOL CELL BIOL, V27, P8152, DOI 10.1128/MCB.00227-07
   Geng LN, 2012, DEV CELL, V22, P38, DOI 10.1016/j.devcel.2011.11.013
   Han K, 2011, PLOS GENET, V7, DOI 10.1371/journal.pgen.1002388
   Ichijo H, 1997, SCIENCE, V275, P90, DOI 10.1126/science.275.5296.90
   Jung HY, 2010, J BIOL CHEM, V285, P54, DOI 10.1074/jbc.M109.045229
   Le Romancer M, 2008, MOL CELL, V31, P212, DOI 10.1016/j.molcel.2008.05.025
   Lin FR, 2012, BLOOD, V120, P1039, DOI 10.1182/blood-2011-12-399808
   Maruyama T, 2014, SCI SIGNAL, V7, DOI 10.1126/scisignal.2004822
   Matsuzawa A, 2005, NAT IMMUNOL, V6, P587, DOI 10.1038/ni1200
   Morita K, 2001, EMBO J, V20, P6028, DOI 10.1093/emboj/20.21.6028
   Nagai H, 2009, MOL CELL, V36, P805, DOI 10.1016/j.molcel.2009.10.016
   Nakagawa H, 2011, HEPATOLOGY, V54, P185, DOI 10.1002/hep.24357
   Nishitoh H, 1998, MOL CELL, V2, P389, DOI 10.1016/S1097-2765(00)80283-X
   Nishitoh H, 2008, GENE DEV, V22, P1451, DOI 10.1101/gad.1640108
   Noguchi T, 2005, J BIOL CHEM, V280, P37033, DOI 10.1074/jbc.M506771200
   Noguchi T, 2008, J BIOL CHEM, V283, P7657, DOI 10.1074/jbc.M708402200
   Osaka N, 2007, J CELL BIOL, V176, P903, DOI 10.1083/jcb.200611015
   Ozato K, 2008, NAT REV IMMUNOL, V8, P849, DOI 10.1038/nri2413
   Ryuno H., 2017, ADV BIOL REGUL
   Saitoh M, 1998, EMBO J, V17, P2596, DOI 10.1093/emboj/17.9.2596
   Seligson DB, 2005, NATURE, V435, P1262, DOI 10.1038/nature03672
   Soga M, 2012, INT J CELL BIOL
   Tobiume K, 2001, EMBO REP, V2, P222, DOI 10.1093/embo-reports/kve046
   Wei S, 2014, ADV ANAT PATHOL, V21, P359, DOI 10.1097/PAP.0000000000000036
   Yamagata K, 2008, MOL CELL, V32, P221, DOI 10.1016/j.molcel.2008.09.013
   Yang YZ, 2013, NAT REV CANCER, V13, P37, DOI 10.1038/nrc3409
NR 30
TC 25
Z9 25
U1 0
U2 3
PU CELL PRESS
PI CAMBRIDGE
PA 50 HAMPSHIRE ST, FLOOR 5, CAMBRIDGE, MA 02139 USA
SN 2211-1247
J9 CELL REP
JI Cell Reports
PD NOV 28
PY 2017
VL 21
IS 9
BP 2447
EP 2457
DI 10.1016/j.celrep.2017.11.007
PG 11
WC Cell Biology
WE Science Citation Index Expanded (SCI-EXPANDED)
SC Cell Biology
GA FO6NA
UT WOS:000416979500011
PM 29186683
OA gold
DA 2022-04-10
ER

PT J
AU George, OL
   Ness, SA
AF George, Olivia L.
   Ness, Scott A.
TI Situational Awareness: Regulation of the Myb Transcription Factor in
   Differentiation, the Cell Cycle and Oncogenesis
SO CANCERS
LA English
DT Review
DE chromatin; gene regulation; cyclins; post-translational modification;
   cancer; salivary gland; epithelia; differentiation; RNA splicing;
   signaling
ID DNA-BINDING DOMAIN; LINEAGE LEUKEMIA PROTEIN; CASEIN KINASE-II; FACTOR
   C-MYB; B-MYB; V-MYB; SANT DOMAIN; KIX DOMAIN; HEMATOPOIETIC-CELLS;
   GENE-EXPRESSION
AB This review summarizes the mechanism that control the activity of the c-Myb transcription factor in normal cells and tumors, and discusses how c-Myb plays a role in the regulation of the cell cycle. Oncogenic versions of c-Myb contribute to the development of leukemias and solid tumors such as adenoid cystic carcinoma, breast cancer and colon cancer. The activity and specificity of the c-Myb protein seems to be controlled through changes in protein-protein interaction, so understanding how it is regulated could lead to the development of novel therapeutic strategies.
C1 [George, Olivia L.; Ness, Scott A.] Univ New Mexico, Hlth Sci Ctr, Dept Internal Med, Sect Mol Med, MSC07 4025-CRF 121,1 Univ New Mexico, Albuquerque, NM 87131 USA.
   [George, Olivia L.] Univ Hawaii, Dept Humanities Biol, Kapolei, HI 96707 USA.
RP Ness, SA (corresponding author), Univ New Mexico, Hlth Sci Ctr, Dept Internal Med, Sect Mol Med, MSC07 4025-CRF 121,1 Univ New Mexico, Albuquerque, NM 87131 USA.
EM ogeorge@hawaii.edu; sness@salud.unm.edu
RI Ness, Scott/AAV-4009-2020
OI Ness, Scott/0000-0001-6965-8909
FU NIH grantsUnited States Department of Health & Human ServicesNational
   Institutes of Health (NIH) - USA [R01CA170250, R01DE023222]; NIGMS
   IRACDA fellowship award [K12GM088021]; NATIONAL CANCER INSTITUTEUnited
   States Department of Health & Human ServicesNational Institutes of
   Health (NIH) - USANIH National Cancer Institute (NCI) [R01CA170250]
   Funding Source: NIH RePORTER; NATIONAL INSTITUTE OF DENTAL &
   CRANIOFACIAL RESEARCHUnited States Department of Health & Human
   ServicesNational Institutes of Health (NIH) - USANIH National Institute
   of Dental & Craniofacial Research (NIDCR) [R01DE023222] Funding Source:
   NIH RePORTER; NATIONAL INSTITUTE OF GENERAL MEDICAL SCIENCESUnited
   States Department of Health & Human ServicesNational Institutes of
   Health (NIH) - USANIH National Institute of General Medical Sciences
   (NIGMS) [K12GM088021] Funding Source: NIH RePORTER
FX The authors thank the other members of the Ness laboratory, especially
   Kathryn Brayer, for helpful comments and interactions. The authors also
   thank our colleagues in the UNM Cancer Center for continued support and
   productive interactions. This work was supported by NIH grants
   R01CA170250 and R01DE023222 (to SAN). Olivia L. George received partial
   support from NIGMS IRACDA fellowship award K12GM088021.
CR Allen RD, 1999, GENE DEV, V13, P1073, DOI 10.1101/gad.13.9.1073
   Arai M, 2010, FEBS LETT, V584, P4500, DOI 10.1016/j.febslet.2010.10.024
   AZIZ N, 1993, ONCOGENE, V8, P2259
   AZIZ N, 1995, P NATL ACAD SCI USA, V92, P6429, DOI 10.1073/pnas.92.14.6429
   Bar-Shira A, 2002, CANCER RES, V62, P6803
   Bartusel T, 2005, GENE, V351, P171, DOI 10.1016/j.gene.2005.03.035
   Bayly R, 2004, J BIOL CHEM, V279, P55362, DOI 10.1074/jbc.M408654200
   Bender TP, 2004, NAT IMMUNOL, V5, P721, DOI 10.1038/ni1085
   Berge T, 2007, BLOOD CELL MOL DIS, V39, P278, DOI 10.1016/j.bcmd.2007.05.007
   Best JL, 2004, P NATL ACAD SCI USA, V101, P17622, DOI 10.1073/pnas.0406374101
   BEUG H, 1987, GENE DEV, V1, P277, DOI 10.1101/gad.1.3.277
   Bies J, 2002, J BIOL CHEM, V277, P8999, DOI 10.1074/jbc.M110453200
   Bies J, 2013, J BIOL CHEM, V288, P36983, DOI 10.1074/jbc.M113.500264
   BOUSSET K, 1994, CELL MOL BIOL RES, V40, P501
   Boyer LA, 2004, NAT REV MOL CELL BIO, V5, P158, DOI 10.1038/nrm1314
   Boyer LA, 2002, MOL CELL, V10, P935, DOI 10.1016/S1097-2765(02)00634-2
   Bretones G, 2015, BBA-GENE REGUL MECH, V1849, P506, DOI 10.1016/j.bbagrm.2014.03.013
   Brill LB, 2011, MODERN PATHOL, V24, P1169, DOI 10.1038/modpathol.2011.86
   Chayka O, 2005, MOL CELL BIOL, V25, P499, DOI 10.1128/MCB.25.1.499-511.2005
   Cheasley D, 2011, STEM CELLS, V29, P2042, DOI 10.1002/stem.761
   Ciznadija D, 2009, CELL DEATH DIFFER, V16, P1530, DOI 10.1038/cdd.2009.94
   Clappier E, 2007, BLOOD, V110, P1251, DOI 10.1182/blood-2006-12-064683
   COGSWELL JP, 1993, MOL CELL BIOL, V13, P2858, DOI 10.1128/MCB.13.5.2858
   Dai P, 1996, GENE DEV, V10, P528, DOI 10.1101/gad.10.5.528
   Dash AB, 1996, GENE DEV, V10, P1858, DOI 10.1101/gad.10.15.1858
   Denis CM, 2012, BLOOD, V120, P3968, DOI 10.1182/blood-2012-02-411397
   DINI PW, 1995, J VIROL, V69, P2515, DOI 10.1128/JVI.69.4.2515-2524.1995
   DINI PW, 1993, MOL CELL BIOL, V13, P7334, DOI 10.1128/MCB.13.12.7334
   Drabsch Y, 2007, P NATL ACAD SCI USA, V104, P13762, DOI 10.1073/pnas.0700104104
   Du H, 2009, BIOCHEMISTRY-MOSCOW+, V74, P1, DOI 10.1134/S0006297909010015
   DUBENDORFF JW, 1992, GENE DEV, V6, P2524, DOI 10.1101/gad.6.12b.2524
   Emambokus N, 2003, EMBO J, V22, P4478, DOI 10.1093/emboj/cdg434
   Fahl SP, 2009, J IMMUNOL, V183, P5582, DOI 10.4049/jimmunol.0901187
   Feller A, 2011, PLANT J, V66, P94, DOI 10.1111/j.1365-313X.2010.04459.x
   Frampton J, 1996, GENE DEV, V10, P2720, DOI 10.1101/gad.10.21.2720
   Fu SL, 1996, J VIROL, V70, P5600, DOI 10.1128/JVI.70.8.5600-5610.1996
   Ganter B, 1998, EMBO J, V17, P255, DOI 10.1093/emboj/17.1.255
   Gonda TJ, 2008, EXPERT OPIN BIOL TH, V8, P713, DOI 10.1517/14712598.8.6.713 
   GONDA TJ, 1987, J VIROL, V61, P2754, DOI 10.1128/JVI.61.9.2754-2763.1987
   GONDA TJ, 1989, EMBO J, V8, P1777, DOI 10.1002/j.1460-2075.1989.tb03571.x
   Goto NK, 2002, J BIOL CHEM, V277, P43168, DOI 10.1074/jbc.M207660200
   Greig KT, 2008, SEMIN IMMUNOL, V20, P247, DOI 10.1016/j.smim.2008.05.003
   Hess JL, 2006, BLOOD, V108, P297, DOI 10.1182/blood-2005-12-5014
   Hofmann JW, 2014, AGE, V36, P1033, DOI 10.1007/s11357-014-9618-3
   HU YL, 1991, ONCOGENE, V6, P1549
   Humphrey GW, 2001, J BIOL CHEM, V276, P6817, DOI 10.1074/jbc.M007372200
   INTRONA M, 1990, CELL, V63, P1287, DOI 10.1016/0092-8674(90)90424-D
   Joaquin M, 2003, CELL MOL LIFE SCI, V60, P2389, DOI 10.1007/s00018-003-3037-4
   Johnson LR, 2002, J BIOL CHEM, V277, P4088, DOI 10.1074/jbc.M105112200
   Kasper LH, 2013, PLOS ONE, V8, DOI 10.1371/journal.pone.0082684
   Kitagawa K, 2010, CELL DIV, V5, DOI 10.1186/1747-1028-5-27
   Knight AS, 2009, ONCOGENE, V28, P1737, DOI 10.1038/onc.2009.22
   Kolodziejska KM, 2008, CIRC RES, V102, P554, DOI 10.1161/CIRCRESAHA.105.162628
   Lahortiga I, 2007, NAT GENET, V39, P593, DOI 10.1038/ng2025
   Lei WL, 2005, BLOOD, V105, P3855, DOI 10.1182/blood-2004-08-3342
   Lei WL, 2004, J BIOL CHEM, V279, P29519, DOI 10.1074/jbc.M403133200
   Leverson JD, 1998, MOL CELL, V1, P203, DOI 10.1016/S1097-2765(00)80021-0
   Lipsick JS, 2001, BLOOD CELL MOL DIS, V27, P456, DOI 10.1006/bcmd.2001.0404
   Lipsick JS, 1996, ONCOGENE, V13, P223
   Liu F, 2006, ONCOGENE, V25, P795, DOI 10.1038/sj.onc.1209105
   Loven J, 2013, CELL, V153, P320, DOI 10.1016/j.cell.2013.03.036
   Lu BC, 2009, NAT GENET, V41, P1295, DOI 10.1038/ng.476
   LUSCHER B, 1992, J CELL BIOL, V118, P775, DOI 10.1083/jcb.118.4.775
   LUSCHER B, 1990, NATURE, V344, P517, DOI 10.1038/344517a0
   Malaterre J, 2008, STEM CELLS, V26, P173, DOI 10.1634/stemcells.2007-0293
   Malaterre J, 2007, P NATL ACAD SCI USA, V104, P3829, DOI 10.1073/pnas.0610055104
   Mannefeld M, 2009, CANCER RES, V69, P4073, DOI 10.1158/0008-5472.CAN-08-4156
   Marhamati DJ, 1997, MOL CELL BIOL, V17, P2448, DOI 10.1128/MCB.17.5.2448
   Martinez I, 2011, CANCER RES, V71, P5370, DOI 10.1158/0008-5472.CAN-11-1044
   Mink S, 1997, MOL CELL BIOL, V17, P6609, DOI 10.1128/MCB.17.11.6609
   Minucci S, 2002, BLOOD, V100, P2989, DOI 10.1182/blood-2001-11-0089
   Mo XM, 2005, GENE DEV, V19, P2447, DOI 10.1101/gad.355405
   MUCENSKI ML, 1991, CELL, V65, P677, DOI 10.1016/0092-8674(91)90099-K
   Mukherjee SP, 2013, PLOS BIOL, V11, DOI 10.1371/journal.pbio.1001647
   NAKAGOSHI H, 1992, ONCOGENE, V7, P1233
   Nakata Y, 2007, MOL CELL BIOL, V27, P2048, DOI 10.1128/MCB.01100-06
   NESS SA, 1987, CELL, V51, P41, DOI 10.1016/0092-8674(87)90008-0
   NESS SA, 1993, GENE DEV, V7, P749, DOI 10.1101/gad.7.5.749
   Ness SA, 1996, BBA-REV CANCER, V1288, pF123, DOI 10.1016/S0304-419X(96)00027-3
   Ness SA, 2003, BLOOD CELL MOL DIS, V31, P192, DOI 10.1016/S1079-9796(03)00151-7
   NESS SA, 1989, CELL, V59, P1115, DOI 10.1016/0092-8674(89)90767-8
   Nomura T, 2004, J BIOL CHEM, V279, P16715, DOI 10.1074/jbc.M313069200
   O'Rourke JP, 2008, MOL CELL BIOL, V28, P2091, DOI 10.1128/MCB.01870-07
   OELGESCHLAGER M, 1995, MOL CELL BIOL, V15, P5966
   Ogata K, 1993, Nucleic Acids Symp Ser, P201
   OGATA K, 1992, P NATL ACAD SCI USA, V89, P6428, DOI 10.1073/pnas.89.14.6428
   Pani E, 2008, BBA-MOL CELL RES, V1783, P1121, DOI 10.1016/j.bbamcr.2008.02.020
   Park DJ, 2003, BLOOD, V102, P3727, DOI 10.1182/blood-2003-02-0412
   Persson M, 2009, P NATL ACAD SCI USA, V106, P18740, DOI 10.1073/pnas.0909114106
   Quintana AM, 2011, PLOS ONE, V6, DOI 10.1371/journal.pone.0017362
   Quintana AM, 2011, BMC CANCER, V11, DOI 10.1186/1471-2407-11-30
   Ramsay RG, 2003, EXPERT OPIN THER TAR, V7, P235
   RAMSAY RG, 1995, ONCOGENE, V11, P2113
   Ramsay RG, 2008, NAT REV CANCER, V8, P523, DOI 10.1038/nrc2439
   Raschella G, 1999, CANCER RES, V59, P3365
   Robinson C, 1996, ONCOGENE, V12, P1855
   Rushton JJ, 2003, ONCOGENE, V22, P308, DOI 10.1038/sj.onc.1206131
   Rushton JJ, 2001, BLOOD CELL MOL DIS, V27, P459, DOI 10.1006/bcmd.2001.0405
   Sadasivam S, 2012, GENE DEV, V26, P474, DOI 10.1101/gad.181933.111
   SALA A, 1992, P NATL ACAD SCI USA, V89, P10415, DOI 10.1073/pnas.89.21.10415
   Sala A, 1996, J BIOL CHEM, V271, P28738, DOI 10.1074/jbc.271.46.28738
   Sala A, 1999, J CELL PHYSIOL, V179, P245
   Sandberg ML, 2005, DEV CELL, V8, P153, DOI 10.1016/j.devcel.2004.12.015
   Schmit F, 2009, FEBS J, V276, P5703, DOI 10.1111/j.1742-4658.2009.07261.x
   SCHUUR ER, 1994, ONCOGENE, V9, P3363
   SHENONG GLC, 1990, MOL CELL BIOL, V10, P2715, DOI 10.1128/MCB.10.6.2715
   Shi J, 2013, GENE DEV, V27, P2648, DOI 10.1101/gad.232710.113
   Spender LC, 2014, CANCER MANAG RES, V6, P27, DOI 10.2147/CMAR.S37745
   Sramko M, 2006, J BIOL CHEM, V281, P40065, DOI 10.1074/jbc.M609404200
   Sterner DE, 2002, J BIOL CHEM, V277, P8178, DOI 10.1074/jbc.M108601200
   Sun HX, 2008, CANCER PREV RES, V1, P316, DOI 10.1158/1940-6207.CAPR-07-0002
   Tahirov TH, 1999, ACTA CRYSTALLOGR D, V55, P1345, DOI 10.1107/S0907444999005041
   Thomas MD, 2005, IMMUNITY, V23, P275, DOI 10.1016/j.immuni.2005.08.005
   Thorner AR, 2009, ONCOGENE, V28, P742, DOI 10.1038/onc.2008.430
   Thorner AR, 2010, PLOS ONE, V5, DOI 10.1371/journal.pone.0013073
   Tomita A, 2000, ONCOGENE, V19, P444, DOI 10.1038/sj.onc.1203329
   Toto A, 2014, PROTEIN SCI, V23, P962, DOI 10.1002/pro.2480
   Vegiopoulos A, 2006, BLOOD, V107, P4703, DOI 10.1182/blood-2005-07-2968
   Wang DM, 2002, ONCOGENE, V21, P1611, DOI 10.1038/sj.onc.1205236
   Wang F, 2009, ACS CHEM BIOL, V4, P1017, DOI 10.1021/cb900190u
   Wasner M, 2003, GENE, V312, P225, DOI 10.1016/S0378-1119(03)00618-8
   Wasner M, 2003, FEBS LETT, V536, P66, DOI 10.1016/S0014-5793(03)00028-0
   WESTIN EH, 1990, ONCOGENE, V5, P1117
   Wilczek C, 2009, J BIOL CHEM, V284, P35314, DOI 10.1074/jbc.M109.066175
   Winn LM, 2003, CELL CYCLE, V2, P258, DOI 10.4161/cc.2.3.383
   Wright JB, 2010, MOL CELL BIOL, V30, P1411, DOI 10.1128/MCB.01384-09
   Yang C, 1998, MOL CELL BIOL, V18, P2218, DOI 10.1128/MCB.18.4.2218
   Yarakamon V, 2008, BLOOD CELL MOL DIS, V40, P219, DOI 10.1016/j.bcmd.2007.08.006
   Zaret KS, 2008, COLD SH Q B, V73, P119, DOI 10.1101/sqb.2008.73.040
   Zaret KS, 2011, GENE DEV, V25, P2227, DOI 10.1101/gad.176826.111
   Zhou Y, 2011, FRONT BIOSCI-LANDMRK, V16, P1109, DOI 10.2741/3738
   Zhou YE, 2011, PLOS ONE, V6, DOI 10.1371/journal.pone.0022880
   Zhu WC, 2004, EMBO J, V23, P4615, DOI 10.1038/sj.emboj.7600459
   Zor T, 2004, J MOL BIOL, V337, P521, DOI 10.1016/j.jmb.2004.01.038
   Zorbas M, 1999, ONCOGENE, V18, P5821, DOI 10.1038/sj.onc.1202971
NR 135
TC 43
Z9 49
U1 1
U2 8
PU MDPI AG
PI BASEL
PA ST ALBAN-ANLAGE 66, CH-4052 BASEL, SWITZERLAND
SN 2072-6694
J9 CANCERS
JI Cancers
PD DEC
PY 2014
VL 6
IS 4
BP 2049
EP 2071
DI 10.3390/cancers6042049
PG 23
WC Oncology
WE Science Citation Index Expanded (SCI-EXPANDED)
SC Oncology
GA V47KN
UT WOS:000209950800009
PM 25279451
OA Green Published, gold, Green Submitted
DA 2022-04-10
ER

PT J
AU Zhang, JS
   Zhang, PJ
   Wei, YK
   Piao, HL
   Wang, WQ
   Maddika, S
   Wang, M
   Chen, DH
   Sun, YT
   Hung, MC
   Chen, JJ
   Ma, L
AF Zhang, Jinsong
   Zhang, Peijing
   Wei, Yongkun
   Piao, Hai-long
   Wang, Wenqi
   Maddika, Subbareddy
   Wang, Min
   Chen, Dahu
   Sun, Yutong
   Hung, Mien-Chie
   Chen, Junjie
   Ma, Li
TI Deubiquitination and stabilization of PTEN by USP13
SO NATURE CELL BIOLOGY
LA English
DT Article
ID TUMOR-SUPPRESSOR; BREAST-CANCER; CELLS; MUTATIONS; GENE; PIK3CA;
   UBIQUITINATION; PATHWAY; LIGASE
AB The tumour suppressor PTEN is frequently lost in human cancers. In addition to gene mutations and deletions, recent studies have revealed the importance of post-translational modification, such as ubiquitination, in the regulation of PTEN stability, activity and localization. However, the deubiquitylase that regulates PTEN polyubiquitination and protein stability remains unknown. Here we screened a total of 30 deubiquitylating enzymes (DUBs) and identified five DUBs that physically associate with PTEN. One of them, USP13, stabilizes the PTEN protein through direct binding and deubiquitination of PTEN. Loss of USP13 in breast cancer cells promotes AKT phosphorylation, cell proliferation, anchorage-independent growth, glycolysis and tumour growth through downregulation of PTEN. Conversely, overexpression of USP13 suppresses tumorigenesis and glycolysis in PTEN-positive but not PTEN-null breast cancer cells. Importantly, USP13 protein is downregulated in human breast tumours and correlates with PTEN protein levels. These findings identify USP13 as a tumour-suppressing protein that functions through deubiquitination and stabilization of PTEN.
C1 [Zhang, Jinsong; Zhang, Peijing; Piao, Hai-long; Wang, Wenqi; Wang, Min; Chen, Dahu; Chen, Junjie; Ma, Li] Univ Texas MD Anderson Canc Ctr, Dept Expt Radiat Oncol, Houston, TX 77030 USA.
   [Wei, Yongkun; Sun, Yutong; Hung, Mien-Chie] Univ Texas MD Anderson Canc Ctr, Dept Mol & Cellular Oncol, Houston, TX 77030 USA.
   [Maddika, Subbareddy] Ctr DNA Fingerprinting & Diagnost CDFD, Lab Cell Death & Cell Survival, Hyderabad 500001, Andhra Pradesh, India.
   [Hung, Mien-Chie; Chen, Junjie; Ma, Li] Univ Texas Hlth Sci Ctr Houston, Canc Biol Program, Grad Sch Biomed Sci, Houston, TX 77030 USA.
   [Hung, Mien-Chie] China Med Univ, Ctr Mol Med, Taichung 402, Taiwan.
   [Hung, Mien-Chie] China Med Univ, Grad Inst Canc Biol, Taichung 402, Taiwan.
RP Ma, L (corresponding author), Univ Texas MD Anderson Canc Ctr, Dept Expt Radiat Oncol, Houston, TX 77030 USA.
EM lma4@mdanderson.org
RI Hung, Mien-Chie/ABD-5911-2021; Chen, Dahu/AAX-6349-2021
OI Hung, Mien-Chie/0000-0003-4317-4740; Wang, Wenqi/0000-0003-4053-5088;
   Sun, Yutong/0000-0002-9368-2957; Ma, Li/0000-0001-9965-989X; Zhang,
   Peijing/0000-0003-1586-8710
FU US National Institutes of HealthUnited States Department of Health &
   Human ServicesNational Institutes of Health (NIH) - USA [R00CA138572,
   R01CA166051]; Cancer Prevention and Research Institute of Texas [R1004];
   NATIONAL CANCER INSTITUTEUnited States Department of Health & Human
   ServicesNational Institutes of Health (NIH) - USANIH National Cancer
   Institute (NCI) [R01CA166051, P30CA016672, R00CA138572] Funding Source:
   NIH RePORTER
FX We thank J. Yuan, Z. Gong, A. Sorokin, J. Wang, N. Li, L. Feng and L. Li
   for reagents and technical assistance. This work is supported by US
   National Institutes of Health grants R00CA138572 (to L.M.) and
   R01CA166051 (to L.M.) and a Cancer Prevention and Research Institute of
   Texas Scholar Award R1004 (to L.M.).
CR Ahmed SF, 2012, J BIOL CHEM, V287, P15996, DOI 10.1074/jbc.M111.321083
   Alimonti A, 2010, NAT GENET, V42, P454, DOI 10.1038/ng.556
   Chen DH, 2012, NAT MED, V18, P1511, DOI 10.1038/nm.2940
   Di Cristofano A, 1998, NAT GENET, V19, P348, DOI 10.1038/1235
   Elias JE, 2007, NAT METHODS, V4, P207, DOI 10.1038/nmeth1019
   Elstrom RL, 2004, CANCER RES, V64, P3892, DOI 10.1158/0008-5472.CAN-03-2904
   Fata J. E., 2012, INT J CELL BIOL, V2012
   Garcia-Cao I, 2012, CELL, V149, P49, DOI 10.1016/j.cell.2012.02.030
   Giaccia AJ, 1998, GENE DEV, V12, P2973, DOI 10.1101/gad.12.19.2973
   Gustafson S., SEMIN ONCOL
   Hollander MC, 2011, NAT REV CANCER, V11, P289, DOI 10.1038/nrc3037
   Hollestelle A, 2007, MOL CANCER RES, V5, P195, DOI 10.1158/1541-7786.MCR-06-0263
   Kim JS, 2007, MOL CELL BIOL, V27, P662, DOI 10.1128/MCB.00537-06
   Lee C, 2004, CANCER RES, V64, P6906, DOI 10.1158/0008-5472.CAN-04-1767
   Lee JO, 1999, CELL, V99, P323, DOI 10.1016/S0092-8674(00)81663-3
   Leevers SJ, 1999, CURR OPIN CELL BIOL, V11, P219, DOI 10.1016/S0955-0674(99)80029-5
   Li J, 1997, SCIENCE, V275, P1943, DOI 10.1126/science.275.5308.1943
   Liaw D, 1997, NAT GENET, V16, P64, DOI 10.1038/ng0597-64
   Maddika S, 2011, NAT CELL BIOL, V13, P728, DOI 10.1038/ncb2240
   Maehama T, 1998, J BIOL CHEM, V273, P13375, DOI 10.1074/jbc.273.22.13375
   Manning BD, 2007, CELL, V129, P1261, DOI 10.1016/j.cell.2007.06.009
   Perez-Tenorio G, 2007, CLIN CANCER RES, V13, P3577, DOI 10.1158/1078-0432.CCR-06-1609
   Salmena L, 2008, CELL, V133, P403, DOI 10.1016/j.cell.2008.04.013
   Shevchenko A, 1996, ANAL CHEM, V68, P850, DOI 10.1021/ac950914h
   Shi YJ, 2012, J CELL SCI, V125, P4687, DOI 10.1242/jcs.093765
   Song MS, 2008, NATURE, V455, P813, DOI 10.1038/nature07290
   Song MS, 2012, NAT REV MOL CELL BIO, V13, P283, DOI 10.1038/nrm3330
   Song MS, 2011, CELL, V144, P187, DOI 10.1016/j.cell.2010.12.020
   Steck PA, 1997, NAT GENET, V15, P356, DOI 10.1038/ng0497-356
   Trotman LC, 2007, CELL, V128, P141, DOI 10.1016/j.cell.2006.11.040
   Van Themsche C, 2009, J BIOL CHEM, V284, P20462, DOI 10.1074/jbc.C109.009522
   Wang X, 2008, ONCOGENE, V27, P5454, DOI 10.1038/onc.2008.242
   Wang XJ, 2007, CELL, V128, P129, DOI 10.1016/j.cell.2006.11.039
   WARBURG O, 1956, SCIENCE, V123, P309, DOI 10.1126/science.123.3191.309
   Weigelt B, 2011, ONCOGENE, V30, P3222, DOI 10.1038/onc.2011.42
   Wilkinson KD, 1997, FASEB J, V11, P1245, DOI 10.1096/fasebj.11.14.9409543
   Yuan J, 2010, CELL, V140, P384, DOI 10.1016/j.cell.2009.12.032
   Zhao XS, 2011, NAT COMMUN, V2, DOI 10.1038/ncomms1421
NR 38
TC 115
Z9 123
U1 1
U2 27
PU NATURE PUBLISHING GROUP
PI LONDON
PA MACMILLAN BUILDING, 4 CRINAN ST, LONDON N1 9XW, ENGLAND
SN 1465-7392
EI 1476-4679
J9 NAT CELL BIOL
JI Nat. Cell Biol.
PD DEC
PY 2013
VL 15
IS 12
BP 1486
EP +
DI 10.1038/ncb2874
PG 20
WC Cell Biology
WE Science Citation Index Expanded (SCI-EXPANDED)
SC Cell Biology
GA 265IL
UT WOS:000327944200013
PM 24270891
OA Green Accepted, Green Submitted
DA 2022-04-10
ER

PT J
AU Solleder, M
   Guillaume, P
   Racle, J
   Michaux, J
   Pak, HS
   Muller, M
   Coukos, G
   Bassani-Sternberg, M
   Gfeller, D
AF Solleder, Marthe
   Guillaume, Philippe
   Racle, Julien
   Michaux, Justine
   Pak, Hui-Song
   Mueller, Markus
   Coukos, George
   Bassani-Sternberg, Michal
   Gfeller, David
TI Mass Spectrometry Based Immunopeptidomics Leads to Robust Predictions of
   Phosphorylated HLA Class I Ligands
SO MOLECULAR & CELLULAR PROTEOMICS
LA English
DT Article
ID MHC CLASS-I; PROTEIN-PHOSPHORYLATION; PEPTIDE REPERTOIRE;
   MOLECULAR-BASIS; IDENTIFICATION; DATABASE; REVEALS; PHOSPHOPEPTIDES;
   ENABLES
AB The presentation of peptides on class I human leukocyte antigen (HLA-I) molecules plays a central role in immune recognition of infected or malignant cells. In cancer, non-self HLA-I ligands can arise from many different alterations, including non-synonymous mutations, gene fusion, cancer-specific alternative mRNA splicing or aberrant post-translational modification. Identifying HLA-I ligands remains a challenging task that requires either heavy experimental work for in vivo identification or optimized bioinformatics tools for accurate predictions. To date, no HLA-I ligand predictor includes post-translational modification. To fill this gap, we curated phosphorylated HLA-I ligands from several immunopeptidomics studies (including six newly measured samples) covering 72 HLA-I alleles and retrieved a total of 2,066 unique phosphorylated peptides. We then expanded our motif deconvolution tool to identify precise binding motifs of phosphorylated HLA-I ligands. Our results reveal a clear enrichment of phosphorylated peptides among HLA-C ligands and demonstrate a prevalent role of both HLA-I motifs and kinase motifs on the presentation of phosphorylated peptides. These data further enabled us to develop and validate the first predictor of interactions between HLA-I molecules and phosphorylated peptides.
C1 [Solleder, Marthe; Guillaume, Philippe; Racle, Julien; Michaux, Justine; Pak, Hui-Song; Coukos, George; Bassani-Sternberg, Michal; Gfeller, David] Univ Lausanne, Ludwig Inst Canc Res, Dept Oncol, Lausanne, Switzerland.
   [Solleder, Marthe; Racle, Julien; Mueller, Markus; Gfeller, David] Swiss Inst Bioinformat, Lausanne, Switzerland.
   [Michaux, Justine; Pak, Hui-Song; Coukos, George; Bassani-Sternberg, Michal] Univ Hosp Lausanne, Ludwig Inst Canc Res, Dept Oncol, Lausanne, Switzerland.
RP Bassani-Sternberg, M; Gfeller, D (corresponding author), Univ Lausanne, Ludwig Inst Canc Res, Dept Oncol, Lausanne, Switzerland.; Gfeller, D (corresponding author), Swiss Inst Bioinformat, Lausanne, Switzerland.; Bassani-Sternberg, M (corresponding author), Univ Hosp Lausanne, Ludwig Inst Canc Res, Dept Oncol, Lausanne, Switzerland.
EM Michal.Bassani@chuv.ch; David.Gfeller@unil.ch
RI Racle, Julien/F-3215-2010; Coukos, George/ABG-7389-2020;
   Bassani-Sternberg, Michal/AAQ-3413-2020
OI Racle, Julien/0000-0002-0100-0323; Bassani-Sternberg,
   Michal/0000-0002-1934-954X; Muller, Markus/0000-0003-0907-3583
CR Abelin JG, 2017, IMMUNITY, V46, P315, DOI 10.1016/j.immuni.2017.02.007
   Alpizar A, 2017, MOL CELL PROTEOMICS, V16, P181, DOI 10.1074/mcp.M116.063800
   Andersen MH, 1999, J IMMUNOL, V163, P3812
   Andreatta M, 2019, PROTEOMICS, V19, DOI 10.1002/pmic.201800357
   Andreatta M, 2016, BIOINFORMATICS, V32, P511, DOI 10.1093/bioinformatics/btv639
   Archer TC, 2018, CANCER CELL, V34, P396, DOI 10.1016/j.ccell.2018.08.004
   Ardito F, 2017, INT J MOL MED, V40, P271, DOI 10.3892/ijmm.2017.3036
   Bassani-Sternberet M, 2016, J IMMUNOL, V197, P2492, DOI 10.4049/jimmunol.1600808
   Bassani-Sternberg M, 2017, PLOS COMPUT BIOL, V13, DOI 10.1371/journal.pcbi.1005725
   Bassani-Sternberg M, 2016, NAT COMMUN, V7, DOI 10.1038/ncomms13404
   Bassani-Sternberg M, 2015, MOL CELL PROTEOMICS, V14, P658, DOI 10.1074/mcp.M114.042812
   Blume-Jensen P, 2001, NATURE, V411, P355, DOI 10.1038/35077225
   Cho Y, 2018, CELL DEATH DIFFER, V25, P1781, DOI 10.1038/s41418-018-0079-6
   Chong C, 2018, MOL CELL PROTEOMICS, V17, P533, DOI 10.1074/mcp.TIR117.000383
   Cobbold M, 2013, SCI TRANSL MED, V5, DOI 10.1126/scitranslmed.3006061
   Cox J, 2008, NAT BIOTECHNOL, V26, P1367, DOI 10.1038/nbt.1511
   Di Marco M, 2017, J IMMUNOL, V199, P2639, DOI 10.4049/jimmunol.1700938
   Diella F, 2008, NUCLEIC ACIDS RES, V36, pD240, DOI 10.1093/nar/gkm772
   Dinkel H, 2011, NUCLEIC ACIDS RES, V39, pD261, DOI 10.1093/nar/gkq1104
   Gfeller D., 2018, J IMMUNOL, V202, P1
   Gfeller D, 2018, FRONT IMMUNOL, V9, DOI 10.3389/fimmu.2018.01716
   Giam K, 2015, TISSUE ANTIGENS, V85, P492, DOI 10.1111/tan.12565
   Hanahan D, 2000, CELL, V100, P57, DOI 10.1016/S0092-8674(00)81683-9
   HENIKOFF S, 1992, P NATL ACAD SCI USA, V89, P10915, DOI 10.1073/pnas.89.22.10915
   Hornbeck PV, 2015, NUCLEIC ACIDS RES, V43, pD512, DOI 10.1093/nar/gku1267
   Humphrey SJ, 2015, TRENDS ENDOCRIN MET, V26, P676, DOI 10.1016/j.tem.2015.09.013
   HUNTER T, 1995, CELL, V80, P225, DOI 10.1016/0092-8674(95)90405-0
   Jarrold J, 2019, TRENDS MOL MED, V25, P993, DOI 10.1016/j.molmed.2019.05.007
   Jurtz V, 2017, J IMMUNOL, V199, P3360, DOI 10.4049/jimmunol.1700893
   Krueger KE, 2006, MOL CELL PROTEOMICS, V5, P1799, DOI 10.1074/mcp.R600009-MCP200
   Krug K, 2019, MOL CELL PROTEOMICS, V18, P576, DOI 10.1074/mcp.TIR118.000943
   Lin MH, 2019, VACCINE-X, V1, DOI 10.1016/j.jvacx.2019.100017
   Marcilla M, 2014, MOL CELL PROTEOMICS, V13, P462, DOI 10.1074/mcp.M113.034314
   Meyer VS, 2009, J PROTEOME RES, V8, P3666, DOI 10.1021/pr800937k
   Mohammed F, 2008, NAT IMMUNOL, V9, P1236, DOI 10.1038/ni.1660
   Mohammed F, 2017, ONCOTARGET, V8, P54160, DOI 10.18632/oncotarget.16952
   Mommen GPM, 2014, P NATL ACAD SCI USA, V111, P4507, DOI 10.1073/pnas.1321458111
   Neefjes J, 2011, NAT REV IMMUNOL, V11, P823, DOI 10.1038/nri3084
   Nielsen M, 2004, BIOINFORMATICS, V20, P1388, DOI 10.1093/bioinformatics/bth100
   O'Donnell TJ, 2018, CELL SYST, V7, P129, DOI 10.1016/j.cels.2018.05.014
   Olsson N, 2018, PROTEOMICS, V18, DOI 10.1002/pmic.201700410
   Ostrov DA, 2012, P NATL ACAD SCI USA, V109, P9959, DOI 10.1073/pnas.1207934109
   Pedregosa F, 2011, J MACH LEARN RES, V12, P2825
   Perez-Riverol Y, 2019, NUCLEIC ACIDS RES, V47, pD442, DOI 10.1093/nar/gky1106
   Petersen J, 2009, P NATL ACAD SCI USA, V106, P2776, DOI 10.1073/pnas.0812901106
   Ramarathinam SH, 2018, PROTEOMICS, V18, DOI 10.1002/pmic.201700253
   Reimers JR, 2013, SCI REP-UK, V3, DOI 10.1038/srep02761
   Robinson J, 2015, NUCLEIC ACIDS RES, V43, pD423, DOI 10.1093/nar/gku1161
   Savitski MM, 2011, MOL CELL PROTEOMICS, V10, DOI 10.1074/mcp.M110.003830
   Schittenhelm RB, 2015, ARTHRITIS RHEUMATOL, V67, P702, DOI 10.1002/art.38963
   Sharma K, 2014, CELL REP, V8, P1583, DOI 10.1016/j.celrep.2014.07.036
   Ullah S., 2016, SCI REP, V6, P1
   Vita R, 2015, NUCLEIC ACIDS RES, V43, pD405, DOI 10.1093/nar/gku938
   Wagih O, 2017, BIOINFORMATICS, V33, P3645, DOI 10.1093/bioinformatics/btx469
   Zarling AL, 2000, J EXP MED, V192, P1755, DOI 10.1084/jem.192.12.1755
   Zarling AL, 2006, P NATL ACAD SCI USA, V103, P14889, DOI 10.1073/pnas.0604045103
NR 56
TC 16
Z9 16
U1 2
U2 8
PU AMER SOC BIOCHEMISTRY MOLECULAR BIOLOGY INC
PI ROCKVILLE
PA 11200 ROCKVILLE PIKE, SUITE 302, ROCKVILLE, MD, UNITED STATES
SN 1535-9476
EI 1535-9484
J9 MOL CELL PROTEOMICS
JI Mol. Cell. Proteomics
PD FEB
PY 2020
VL 19
IS 2
BP 390
EP 404
DI 10.1074/mcp.TIR119.001641
PG 15
WC Biochemical Research Methods
WE Science Citation Index Expanded (SCI-EXPANDED)
SC Biochemistry & Molecular Biology
GA KJ2JG
UT WOS:000511883400013
OA Green Published, Green Submitted, hybrid
DA 2022-04-10
ER

PT J
AU Markey, MP
AF Markey, Michael P.
TI Regulation of MDM4
SO FRONTIERS IN BIOSCIENCE-LANDMARK
LA English
DT Article
DE MDM4; HdmX; HDM4; p53; MDM2; Review
ID WILD-TYPE P53; INTRINSIC-APOPTOTIC PATHWAY; QUANTITATIVE PCR ANALYSIS;
   TUMOR-SUPPRESSOR NETWORK; DNA-DAMAGE; GENE AMPLIFICATION; PROTEASOMAL
   TURNOVER; P53-BINDING PROTEIN; NEGATIVE REGULATOR; MALIGNANT GLIOMAS
AB Mouse double minute 4 (MDM4), also known as MDMX or HDMX (human MDMX), is a critical negative regulator of the tumor suppressor p53. Under normal growth conditions, MDM4 contributes to the repression of p53 activity. Upon DNA damage, it becomes important to down-regulate MDM4 to allow a full p53 response. Here, the mechanism by which MDM4 activity is controlled are reviewed and discussed, starting with alterations in copy number, then control of transcription, mRNA stability, translation, and finally post-translational interactions, modifications, localization, and targeting by recently developed drugs.
C1 Wright State Univ, Dept Biochem & Mol Biol, Dayton, OH 45435 USA.
RP Markey, MP (corresponding author), Wright State Univ, Dept Biochem & Mol Biol, 3640 Colonel Glenn Hwy, Dayton, OH 45435 USA.
EM michael.markey@wright.edu
OI Markey, Michael/0000-0002-8593-2290
FU Ohio Division of the American Cancer SocietyAmerican Cancer Society
FX This research was supported in part through a grant from the Ohio
   Division of the American Cancer Society. I would like to thank Dr.
   Steven Berberich for editing the review.
CR Allende-Vega N, 2010, ONCOGENE, V29, P432, DOI 10.1038/onc.2009.330
   Alonso ME, 2005, AM J CLIN PATHOL, V123, P900, DOI 10.1309/448YRWNC43TE32KQ
   Arjona D, 2005, DIAGN MOL PATHOL, V14, P224, DOI 10.1097/01.pas.0000177799.58336.1a
   Barboza JA, 2008, MOL CANCER RES, V6, P947, DOI 10.1158/1541-7786.MCR-07-2079
   Bartel F, 2004, VERH DEUT G, V88, P199
   Bartel F, 2005, INT J CANCER, V117, P469, DOI 10.1002/ijc.21206
   Bergamaschi D, 2005, ONCOGENE, V24, P3836, DOI 10.1038/sj.onc.1208535
   Bommer GT, 2007, CURR BIOL, V17, P1298, DOI 10.1016/j.cub.2007.06.068
   Bottger V, 1999, ONCOGENE, V18, P189, DOI 10.1038/sj.onc.1202281
   Bottger V, 1996, ONCOGENE, V13, P2141
   Chandler DS, 2006, CANCER RES, V66, P9502, DOI 10.1158/0008-5472.CAN-05-4271
   Chang TC, 2007, MOL CELL, V26, P745, DOI 10.1016/j.molcel.2007.05.010
   Chen LH, 2005, EMBO J, V24, P3411, DOI 10.1038/sj.emboj.7600812
   Chen LH, 2005, MOL CELL BIOL, V25, P6509, DOI 10.1128/MCB.25.15.6509-6520.2005
   Constantinou C, 2005, ONCOGENE, V24, P4839, DOI 10.1038/sj.onc.1208648
   Corson TW, 2007, GENE CHROMOSOME CANC, V46, P617, DOI 10.1002/gcc.20457
   Cummins JM, 2004, NATURE, V428, DOI 10.1038/nature02501
   Dal Bo M, 2010, BRIT J HAEMATOL, V150, P237, DOI 10.1111/j.1365-2141.2010.08185.x
   Danovi D, 2004, MOL CELL BIOL, V24, P5835, DOI 10.1128/MCB.24.13.5835-5843.2004
   de Graaf P, 2003, J BIOL CHEM, V278, P38315, DOI 10.1074/jbc.M213034200
   Dimaras H, 2008, HUM MOL GENET, V17, P1363, DOI 10.1093/hmg/ddn024
   Elias B, 2005, ONCOGENE, V24, P2574, DOI 10.1038/sj.onc.1208488
   Finch RA, 2002, CANCER RES, V62, P3221
   Gentiletti F, 2002, ONCOGENE, V21, P867, DOI 10.1038/sj.onc.1205137
   Ghosh M, 2005, CELL CYCLE, V4, P604
   Giglio S, 2005, CANCER RES, V65, P9687, DOI 10.1158/0008-5472.CAN-05-0450
   Gilkes DM, 2008, MOL CELL BIOL, V28, P1999, DOI 10.1128/MCB.01633-07
   Gilkes DM, 2006, EMBO J, V25, P5614, DOI 10.1038/sj.emboj.7601424
   Grier JD, 2006, MOL CELL BIOL, V26, P192, DOI 10.1128/MCB.26.1.192-198.2006
   Harker EA, 2009, BIOORGAN MED CHEM, V17, P2038, DOI 10.1016/j.bmc.2009.01.039
   Hayashi R, 2009, BIOORGAN MED CHEM, V17, P7884, DOI 10.1016/j.bmc.2009.10.032
   He L, 2007, NATURE, V447, P1130, DOI 10.1038/nature05939
   He XY, 2007, CANCER RES, V67, P11099, DOI 10.1158/0008-5472.CAN-07-2672
   Horton LE, 2002, ONCOGENE, V21, P5325, DOI 10.1038/sj.onc.1205662
   Hu B, 2007, CANCER RES, V67, P8810, DOI 10.1158/0008-5472.CAN-07-1140
   Jackson MW, 2000, MOL CELL BIOL, V20, P1001, DOI 10.1128/MCB.20.3.1001-1007.2000
   Jackson MW, 2001, J BIOL CHEM, V276, P25336, DOI 10.1074/jbc.M010685200
   Jeyaraj SC, 2009, FRONT BIOSCI-LANDMRK, V14, P2647, DOI 10.2741/3402
   Jin Y, 2008, MOL CELL BIOL, V28, P1218, DOI 10.1128/MCB.01198-07
   Jin YT, 2006, EMBO J, V25, P1207, DOI 10.1038/sj.emboj.7601010
   Jin YT, 2003, EMBO J, V22, P6365, DOI 10.1093/emboj/cdg600
   Kadakia M, 2002, ONCOGENE, V21, P8776, DOI 10.1038/sj.onc.1205993
   Kallen J, 2009, J BIOL CHEM, V284, P8803, DOI 10.1074/jbc.M809096200
   Kawai H, 2003, J BIOL CHEM, V278, P45946, DOI 10.1074/jbc.M308295200
   Kawai H, 2007, CANCER RES, V67, P6026, DOI 10.1158/0008-5472.CAN-07-1313
   Laurie NA, 2006, NATURE, V444, P61, DOI 10.1038/nature05194
   LeBron C, 2006, EMBO J, V25, P1196, DOI 10.1038/sj.emboj.7601032
   Li CG, 2002, MOL CELL BIOL, V22, P7562, DOI 10.1128/MCB.22.21.7562-7571.2002
   Lopez-Pajares V, 2008, J BIOL CHEM, V283, P13707, DOI 10.1074/jbc.M710030200
   Mancini F, 2009, CELL CYCLE, V8, P3854, DOI 10.4161/cc.8.23.10089
   Mancini F, 2009, EMBO J, V28, P1926, DOI 10.1038/emboj.2009.154
   Marine JC, 2005, BIOCHEM BIOPH RES CO, V331, P750, DOI 10.1016/j.bbrc.2005.03.151
   Marine JCW, 2007, J CELL SCI, V120, P371, DOI 10.1242/jcs.03362
   Markey M, 2008, ONCOGENE, V27, P6657, DOI 10.1038/onc.2008.266
   Matijasevic Z, 2008, MOL CELL BIOL, V28, P1265, DOI 10.1128/MCB.01108-07
   May P, 1999, ONCOGENE, V18, P7621, DOI 10.1038/sj.onc.1203285
   Meulmeester E, 2005, CELL CYCLE, V4, P1166, DOI 10.4161/cc.4.9.1981
   Meulmeester E, 2005, MOL CELL, V18, P565, DOI 10.1016/j.molcel.2005.04.024
   Migliorini D, 2002, J BIOL CHEM, V277, P7318, DOI 10.1074/jbc.M108795200
   Migliorini D, 2002, MOL CELL BIOL, V22, P5527, DOI 10.1128/MCB.22.15.5527-5538.2002
   Ohtsubo C, 2009, CANCER SCI, V100, P1291, DOI 10.1111/j.1349-7006.2009.01180.x
   Okamoto K, 2005, MOL CELL BIOL, V25, P9608, DOI 10.1128/MCB.25.21.9608-9620.2005
   Okamoto K, 2009, FEBS LETT, V583, P2710, DOI 10.1016/j.febslet.2009.07.021
   Pan Y, 2005, BIOCHEM BIOPH RES CO, V332, P702, DOI 10.1016/j.bbrc.2005.05.012
   Pan Y, 2003, MOL CELL BIOL, V23, P5113, DOI 10.1128/MCB.23.15.5113-5121.2003
   Parant J, 2001, NAT GENET, V29, P92, DOI 10.1038/ng714
   Pazgiera M, 2009, P NATL ACAD SCI USA, V106, P4665, DOI 10.1073/pnas.0900947106
   Pereg Y, 2005, P NATL ACAD SCI USA, V102, P5056, DOI 10.1073/pnas.0408595102
   Pereg Y, 2006, MOL CELL BIOL, V26, P6819, DOI 10.1128/MCB.00562-06
   Phan J, 2010, J BIOL CHEM, V285, P2174, DOI 10.1074/jbc.M109.073056
   Popowicz GM, 2008, CELL CYCLE, V7, P2441, DOI 10.4161/cc.6365
   Popowicz GM, 2007, CELL CYCLE, V6, P2386, DOI 10.4161/cc.6.19.4740
   POTLURI VR, 1986, CANCER, V58, P663, DOI 10.1002/1097-0142(19860801)58:3<663::AID-CNCR2820580311>3.0.CO;2-G
   Prodosmo A, 2008, J MOL MED-JMM, V86, P585, DOI 10.1007/s00109-008-0322-6
   Rallapalli R, 2003, J CELL BIOCHEM, V89, P563, DOI 10.1002/jcb.10535
   Rallapalli R, 1999, J BIOL CHEM, V274, P8299, DOI 10.1074/jbc.274.12.8299
   Ramos YFM, 2001, CANCER RES, V61, P1839
   Raver-Shapira N, 2007, MOL CELL, V26, P731, DOI 10.1016/j.molcel.2007.05.017
   Reed D, 2010, J BIOL CHEM, V285, P10786, DOI 10.1074/jbc.M109.056747
   Rickman DS, 2001, CANCER RES, V61, P6885
   Riemenschneider MJ, 2003, INT J CANCER, V104, P752, DOI 10.1002/ijc.11023
   Riemenschneider MJ, 1999, CANCER RES, V59, P6091
   Sabbatini P, 2002, DNA CELL BIOL, V21, P519, DOI 10.1089/104454902320219077
   Schlaeger C, 2008, HEPATOLOGY, V47, P511, DOI 10.1002/hep.22033
   Shvarts A, 1996, EMBO J, V15, P5349, DOI 10.1002/j.1460-2075.1996.tb00919.x
   Shvarts A, 1997, GENOMICS, V43, P34, DOI 10.1006/geno.1997.4775
   Stad R, 2000, J BIOL CHEM, V275, P28039
   Stad R, 2001, EMBO REP, V2, P1029, DOI 10.1093/embo-reports/kve227
   Strachan GD, 2003, J CELL BIOCHEM, V88, P557, DOI 10.1002/jcb.10318
   Strachan GD, 2001, J BIOL CHEM, V276, P45677, DOI 10.1074/jbc.M103765200
   Tarasov V, 2007, CELL CYCLE, V6, P1586, DOI 10.4161/cc.6.13.4436
   Tilleray V, 2006, FEBS LETT, V580, P1766, DOI 10.1016/j.febslet.2006.02.030
   Toledo F, 2006, CANCER CELL, V9, P273, DOI 10.1016/j.ccr.2006.03.014
   Toledo F, 2007, INT J BIOCHEM CELL B, V39, P1476, DOI 10.1016/j.biocel.2007.03.022
   Uchida C, 2006, FEBS LETT, V580, P1753, DOI 10.1016/j.febslet.2006.02.029
   Valentin-Vega YA, 2007, HUM PATHOL, V38, P1553, DOI 10.1016/j.humpath.2007.03.005
   Vassilev LT, 2004, SCIENCE, V303, P844, DOI 10.1126/science.1092472
   Veerakumarasivam A, 2008, CLIN CANCER RES, V14, P2527, DOI 10.1158/1078-0432.CCR-07-4129
   Wade M, 2009, MOL CANCER RES, V7, P1, DOI 10.1158/1541-7786.MCR-08-0423
   Wang L., 2010, MOL BIOL REP    0324
   Wunderlich M, 2004, CELL CYCLE, V3, P472
   Xia MX, 2008, CELL CYCLE, V7, P1604, DOI 10.4161/cc.7.11.5929
   Xiong SB, 2006, P NATL ACAD SCI USA, V103, P3226, DOI 10.1073/pnas.0508500103
   Yam CH, 1999, CANCER RES, V59, P5075
   Zhang Z, 2004, J BIOL CHEM, V279, P16000, DOI 10.1074/jbc.M312264200
   Zhu NX, 2005, BIOCHEM BIOPH RES CO, V335, P1272, DOI 10.1016/j.bbrc.2005.08.026
   Zuckerman V, 2009, J BIOL CHEM, V284, P4031, DOI 10.1074/jbc.M809211200
NR 107
TC 16
Z9 16
U1 2
U2 8
PU FRONTIERS IN BIOSCIENCE INC
PI IRVINE
PA 16471 SCIENTIFIC WAY, IRVINE, CA 92618 USA
SN 1093-9946
EI 1093-4715
J9 FRONT BIOSCI-LANDMRK
JI Front. Biosci.
PD JAN 1
PY 2011
VL 16
BP 1144
EP 1156
DI 10.2741/3780
PG 13
WC Biochemistry & Molecular Biology; Cell Biology
WE Science Citation Index Expanded (SCI-EXPANDED)
SC Biochemistry & Molecular Biology; Cell Biology
GA 757NC
UT WOS:000290093100020
PM 21196223
DA 2022-04-10
ER

PT J
AU Dasgupta, S
   Cushman, I
   Kpetemey, M
   Casey, PJ
   Vishwanatha, JK
AF Dasgupta, Subhamoy
   Cushman, Ian
   Kpetemey, Marilyne
   Casey, Patrick J.
   Vishwanatha, Jamboor K.
TI Prenylated C17orf37 Induces Filopodia Formation to Promote Cell
   Migration and Metastasis
SO JOURNAL OF BIOLOGICAL CHEMISTRY
LA English
DT Article
ID BREAST-CANCER; GERANYLGERANYLTRANSFERASE-I; 17Q12 AMPLICON; LIPID RAFTS;
   MICE; RAS; FARNESYLTRANSFERASE; PROTEINS; GENE; MICRODOMAINS
AB Post-translational modification by covalent attachment of isoprenoid lipids (prenylation) regulates the functions and biological activities of several proteins implicated in the oncogenic transformation and metastatic progression of cancer. The largest group of prenylated proteins contains a CAAX motif at the C-terminal that serves as a substrate for a series of post-translational modification that convert these otherwise hydrophilic proteins to lipidated proteins, thus facilitating membrane association. C17orf37 (chromosome 17 open reading frame 37), also known as C35/Rdx12/MGC14832, located in the 17q12 amplicon, is overexpressed in human cancer, and its expression correlates with the migratory and invasive phenotype of cancer cells. Here we show that C17orf37 contains a functional CAAX motif and is post-translationally modified by protein geranylgeranyltransferase-I (GGTase-I). Geranylgeranylation of C17orf37 at the CAAX motif facilitates association of the protein to the inner leaflet of plasma membrane, enhances migratory phenotype of cells by inducing increased filopodia formation, and potentiates directional migration. A prenylation-deficient mutant of C17orf37 is functionally inactive and fails to trigger dissemination of tail vein-injected cells in a mouse model of metastasis. These findings demonstrate that prenylation is required for the function of the C17orf37 protein in cancer cells and imply that the post-translational modification may functionally regulate metastatic progression of disease.
C1 [Dasgupta, Subhamoy; Kpetemey, Marilyne; Vishwanatha, Jamboor K.] Univ N Texas Hlth Sci Ctr, Dept Biomed Sci, Ft Worth, TX 76107 USA.
   [Dasgupta, Subhamoy; Kpetemey, Marilyne; Vishwanatha, Jamboor K.] Univ N Texas Hlth Sci Ctr, Inst Canc Res, Ft Worth, TX 76107 USA.
   [Cushman, Ian; Casey, Patrick J.] Duke Univ, Dept Pharmacol & Canc Biol, Durham, NC USA.
   [Cushman, Ian; Casey, Patrick J.] Duke Natl Univ Singapore Grad Med Sch, Program Canc & Stem Cell Biol, Singapore 169857, Singapore.
RP Vishwanatha, JK (corresponding author), 3500 Camp Bowie Blvd, Ft Worth, TX 76107 USA.
EM jamboor.vishwanatha@unthsc.edu
RI Dasgupta, Subhamoy/I-6022-2015
OI Dasgupta, Subhamoy/0000-0001-7167-908X; Casey,
   Patrick/0000-0002-7366-9309; Vishwanatha, Jamboor/0000-0002-0266-6020
FU National Institutes of HealthUnited States Department of Health & Human
   ServicesNational Institutes of Health (NIH) - USA [MD 001633];
   Department of DefenseUnited States Department of Defense [PC081282];
   NATIONAL CENTER ON MINORITY HEALTH AND HEALTH DISPARITIESUnited States
   Department of Health & Human ServicesNational Institutes of Health (NIH)
   - USANIH National Institute on Minority Health & Health Disparities
   (NIMHD) [P20MD001633] Funding Source: NIH RePORTER; National Institute
   on Minority Health and Health DisparitiesUnited States Department of
   Health & Human ServicesNational Institutes of Health (NIH) - USANIH
   National Institute on Minority Health & Health Disparities (NIMHD)
   [P20MD006882] Funding Source: NIH RePORTER
FX This work was supported, in whole or in part, by National Institutes of
   Health Grant MD 001633 (to J. K. V.). This work was also supported by
   Department of Defense Grant PC081282 (to S. D.).
CR Ashby MN, 1998, CURR OPIN LIPIDOL, V9, P99, DOI 10.1097/00041433-199804000-00004
   Axelrod D, 2001, J BIOMED OPT, V6, P6, DOI 10.1117/1.1335689
   Bergo MO, 2004, J BIOL CHEM, V279, P4729, DOI 10.1074/jbc.M310081200
   Bergo MO, 2001, J BIOL CHEM, V276, P5841, DOI 10.1074/jbc.C000831200
   BRADLEY MO, 1986, P NATL ACAD SCI USA, V83, P5277, DOI 10.1073/pnas.83.14.5277
   Carrico D, 2004, BIOORGAN MED CHEM, V12, P6517, DOI 10.1016/j.bmc.2004.09.020
   Casey PJ, 1996, J BIOL CHEM, V271, P5289, DOI 10.1074/jbc.271.10.5289
   Chhabra ES, 2007, NAT CELL BIOL, V9, P1110, DOI 10.1038/ncb1007-1110
   Cinar B, 2007, J BIOL CHEM, V282, P29584, DOI 10.1074/jbc.M703310200
   Cushman I, 2009, J BIOL CHEM, V284, P27964, DOI 10.1074/jbc.M109.025296
   Dasgupta S, 2009, ONCOGENE, V28, P2860, DOI 10.1038/onc.2009.145
   DER CJ, 1991, CANCER CELL-MON REV, V3, P331
   Evans EE, 2006, MOL CANCER THER, V5, P2919, DOI 10.1158/1535-7163.MCT-06-0389
   Katz E, 2010, BRIT J CANCER, V103, P401, DOI 10.1038/sj.bjc.6605763
   Kauraniemi P, 2006, ENDOCR-RELAT CANCER, V13, P39, DOI 10.1677/erc.1.01147
   Kauraniemi P, 2003, AM J PATHOL, V163, P1979, DOI 10.1016/S0002-9440(10)63556-0
   Kim E, 1999, J BIOL CHEM, V274, P8383, DOI 10.1074/jbc.274.13.8383
   Konstantinopoulos PA, 2007, NAT REV DRUG DISCOV, V6, P540, DOI 10.1038/nrd2221
   Lin X, 2002, GASTROENTEROLOGY, V123, P345, DOI 10.1053/gast.2002.34279
   Magdalena J, 2003, MOL BIOL CELL, V14, P670, DOI 10.1091/mbc.e02-06-0345
   Magdalena J, 2003, J CELL SCI, V116, P743, DOI 10.1242/jcs.00288
   Magee Anthony I, 2003, Biochem J, V376, pe3, DOI 10.1042/BJ20031531
   Mallavarapu A, 1999, J CELL BIOL, V146, P1097, DOI 10.1083/jcb.146.5.1097
   Maqani N, 2006, MOL CANCER RES, V4, P449, DOI 10.1158/1541-7786.MCR-06-0058
   Mattila PK, 2008, NAT REV MOL CELL BIO, V9, P446, DOI 10.1038/nrm2406
   Mayor S, 2004, TRAFFIC, V5, P231, DOI 10.1111/j.1600-0854.2004.00172.x
   Ostrom Rennolds S., 2007, V400, P459
   Pei ZT, 2003, J BIOL CHEM, V278, P47070, DOI 10.1074/jbc.M310075200
   Peterson YK, 2006, J BIOL CHEM, V281, P12445, DOI 10.1074/jbc.M600168200
   Prior IA, 2001, J CELL SCI, V114, P1603
   Roberts PJ, 2008, J BIOL CHEM, V283, P25150, DOI 10.1074/jbc.M800882200
   Rothermund Christy A, 2005, BMC Urol, V5, P5, DOI 10.1186/1471-2490-5-5
   Shaikh SR, 2006, CHEM PHYS LIPIDS, V144, P1, DOI 10.1016/j.chemphyslip.2006.06.017
   Sun JZ, 1999, CANCER RES, V59, P4919
   Thissen JA, 1996, ANAL BIOCHEM, V243, P80, DOI 10.1006/abio.1996.0484
   Valastyan S, 2009, CELL, V137, P1032, DOI 10.1016/j.cell.2009.03.047
   van Meer G, 2002, SCIENCE, V296, P855, DOI 10.1126/science.1071491
   Winter-Vann AM, 2005, NAT REV CANCER, V5, P405, DOI 10.1038/nrc1612
   Woo JT, 2005, BIOCHEM PHARMACOL, V69, P87, DOI 10.1016/j.bcp.2004.08.036
   Zacharias DA, 2002, SCIENCE, V296, P913, DOI 10.1126/science.1068539
   ZHANG FL, 1994, J BIOL CHEM, V269, P23465
   Zhang FL, 1996, ANNU REV BIOCHEM, V65, P241, DOI 10.1146/annurev.bi.65.070196.001325
NR 42
TC 29
Z9 30
U1 0
U2 2
PU AMER SOC BIOCHEMISTRY MOLECULAR BIOLOGY INC
PI BETHESDA
PA 9650 ROCKVILLE PIKE, BETHESDA, MD 20814-3996 USA
EI 1083-351X
J9 J BIOL CHEM
JI J. Biol. Chem.
PD JUL 22
PY 2011
VL 286
IS 29
BP 25935
EP 25946
DI 10.1074/jbc.M111.254599
PG 12
WC Biochemistry & Molecular Biology
WE Science Citation Index Expanded (SCI-EXPANDED)
SC Biochemistry & Molecular Biology
GA 796SS
UT WOS:000293073000053
PM 21628459
OA Green Published, hybrid
DA 2022-04-10
ER

PT J
AU Li, N
   Zhang, YJ
   Han, X
   Liang, K
   Wang, JD
   Feng, L
   Wang, WQ
   Zhou, SY
   Lin, CR
   Yang, LQ
   Yu, YH
   Chen, JJ
AF Li, Nan
   Zhang, Yajie
   Han, Xin
   Liang, Ke
   Wang, Jiadong
   Feng, Lin
   Wang, Wenqi
   Zhou Songyang
   Lin, Chunru
   Yang, Liuqing
   Yu, Yonghao
   Chen, Junjie
TI Poly-ADP ribosylation of PTEN by tankyrases promotes PTEN degradation
   and tumor growth
SO GENES & DEVELOPMENT
LA English
DT Article
DE PTEN; PARsylation; tankyrase; RNF146; ubiquitination
ID TELOMERE LENGTH; POLY(ADP-RIBOSE) POLYMERASE; PROTEIN STABILITY;
   SUPPRESSOR PTEN; GENE; CANCER; PHOSPHORYLATION; MUTATIONS; BREAST;
   LIGASE
AB PTEN [phosphatidylinositol (3,4,5)-trisphosphate phosphatase and tensin homolog deleted from chromosome 10], a phosphatase and critical tumor suppressor, is regulated by numerous post-translational modification, including phosphorylation, ubiquitination, acetylation, and SUMOylation, which affect PTEN localization and protein stability. Here we report ADP-ribosylation as a new post-translational modification of PTEN. We identified PTEN as a novel substrate of tankyrases, which are members of the poly(ADP-ribose) polymerases (PARPs). We showed that tankyrases interact with and ribosylate PTEN, which promotes the recognition of PTEN by a PAR-binding E3 ubiquitinationligase, RNF146, leading to PTEN ubiquitination and degradation. Double knockdown of tankyrase1/2 stabilized PTEN, resulting in the subsequent down-regulation of AKT phosphorylation and thus suppressed cell proliferation and glycolysis in vitro and tumor growth in vivo. Furthermore, tankyrases were up-regulated and negatively correlated with PTEN expression in human colon carcinomas. Together, our study revealed a new regulation of PTEN and highlighted a role for tankyrases in the PTEN-AKT pathway that can be explored further for cancer treatment.
C1 [Li, Nan; Wang, Jiadong; Feng, Lin; Wang, Wenqi; Chen, Junjie] Univ Texas MD Anderson Canc Ctr, Dept Expt Radiat Oncol, Houston, TX 77030 USA.
   [Zhang, Yajie; Yu, Yonghao] Univ Texas SW Med Ctr Dallas, Dept Biochem, Dallas, TX 75390 USA.
   [Han, Xin; Zhou Songyang] Sun Yat Sen Univ, Minist Educ, Key Lab Gene Engn, Guangzhou 510275, Guangdong, Peoples R China.
   [Han, Xin; Zhou Songyang] Sun Yat Sen Univ, State Key Lab Biocontrol, Sch Life Sci, Guangzhou 510275, Guangdong, Peoples R China.
   [Liang, Ke; Lin, Chunru; Yang, Liuqing] Univ Texas MD Anderson Canc Ctr, Dept Mol & Cellular Oncol, Houston, TX 77030 USA.
   [Zhou Songyang] Baylor Coll Med, Verna & Marrs Dept Biochem & Mol Biol, Houston, TX 77030 USA.
RP Chen, JJ (corresponding author), Univ Texas MD Anderson Canc Ctr, Dept Expt Radiat Oncol, Houston, TX 77030 USA.
EM jchen8@mdanderson.org
RI Han, Xin/K-4480-2017
OI Han, Xin/0000-0002-9620-7502; Wang, Wenqi/0000-0003-4053-5088
FU M.D. Anderson Start-up fund; Era of Hope Scholar Research award
   [W81XWH-09-1-0409]; M.D. Anderson's Cancer Center Support Grant
   [CA016672]; University of Texas Southwestern Medical Center Endowed
   Scholar Program; Cancer Prevention and Research Institute of Texas
   [CPRIT R1103]; Welch FoundationThe Welch Foundation [I-1800]; NATIONAL
   CANCER INSTITUTEUnited States Department of Health & Human
   ServicesNational Institutes of Health (NIH) - USANIH National Cancer
   Institute (NCI) [P30CA016672] Funding Source: NIH RePORTER; NATIONAL
   INSTITUTE OF DIABETES AND DIGESTIVE AND KIDNEY DISEASESUnited States
   Department of Health & Human ServicesNational Institutes of Health (NIH)
   - USANIH National Institute of Diabetes & Digestive & Kidney Diseases
   (NIDDK) [R00DK094981] Funding Source: NIH RePORTER
FX We thank all of our colleagues in J.C.'s laboratory for insightful
   discussions, and Kathryn Aziz for assistance with the animal study. This
   work was supported in part by an M.D. Anderson Start-up fund to J.C.
   J.C. is also a recipient of an Era of Hope Scholar Research award
   (W81XWH-09-1-0409). This work was also supported in part by M.D.
   Anderson's Cancer Center Support Grant (CA016672). This work was also
   supported by grants from the University of Texas Southwestern Medical
   Center Endowed Scholar Program, the Cancer Prevention and Research
   Institute of Texas (CPRIT R1103), and the Welch Foundation (I-1800).
   Y.Y. is a Virginia Murchison Linthicum Scholar in Medical Research and a
   CPRIT Scholar in Cancer Research.
CR Bassi C, 2013, SCIENCE, V341, P395, DOI 10.1126/science.1236188
   Berg M, 2010, PLOS ONE, V5, DOI 10.1371/journal.pone.0013978
   Chang W, 2003, GENE DEV, V17, P1328, DOI 10.1101/gad.1077103
   Chiang YJ, 2008, PLOS ONE, V3, DOI 10.1371/journal.pone.0002639
   Chiang YJ, 2006, MOL CELL BIOL, V26, P2037, DOI 10.1128/MCB.26.6.2037-2043.2006
   Di Cristofano A, 1998, NAT GENET, V19, P348, DOI 10.1038/1235
   Dicuonzo G, 2001, CLIN CANCER RES, V7, P4049
   Elstrom RL, 2004, CANCER RES, V64, P3892, DOI 10.1158/0008-5472.CAN-03-2904
   Hobert JA, 2009, GENET MED, V11, P687, DOI 10.1097/GIM.0b013e3181ac9aea
   Hsiao SJ, 2006, MOL CELL BIOL, V26, P2044, DOI 10.1128/MCB.26.6.2044-2054.2006
   Huang J, 2012, NAT COMMUN, V3, DOI 10.1038/ncomms1919
   Huang SMA, 2009, NATURE, V461, P614, DOI 10.1038/nature08356
   Kim MK, 2012, EMBO REP, V13, P724, DOI 10.1038/embor.2012.86
   Kwon J, 2004, P NATL ACAD SCI USA, V101, P16419, DOI 10.1073/pnas.0407396101
   Levaot N, 2011, CELL, V147, P1324, DOI 10.1016/j.cell.2011.10.045
   Li DM, 1997, CANCER RES, V57, P2124
   Li J, 1997, SCIENCE, V275, P1943, DOI 10.1126/science.275.5308.1943
   Liaw D, 1997, NAT GENET, V16, P64, DOI 10.1038/ng0597-64
   Maccario H, 2007, BIOCHEM J, V405, P439, DOI 10.1042/BJ20061837
   Maddika S, 2011, NAT CELL BIOL, V13, P728, DOI 10.1038/ncb2240
   Manning BD, 2007, CELL, V129, P1261, DOI 10.1016/j.cell.2007.06.009
   Morin PJ, 1997, SCIENCE, V275, P1787, DOI 10.1126/science.275.5307.1787
   Okumura K, 2006, J BIOL CHEM, V281, P26562, DOI 10.1074/jbc.M605391200
   Ozaki Y, 2012, MOL CELL, V47, P694, DOI 10.1016/j.molcel.2012.06.033
   Smith S, 1998, SCIENCE, V282, P1484, DOI 10.1126/science.282.5393.1484
   Steck PA, 1997, NAT GENET, V15, P356, DOI 10.1038/ng0497-356
   Suzuki A, 1998, CURR BIOL, V8, P1169, DOI 10.1016/S0960-9822(07)00488-5
   Torres J, 2001, J BIOL CHEM, V276, P993, DOI 10.1074/jbc.M009134200
   Vazquez F, 2000, MOL CELL BIOL, V20, P5010, DOI 10.1128/MCB.20.14.5010-5018.2000
   Wang X, 2008, ONCOGENE, V27, P5454, DOI 10.1038/onc.2008.242
   Wang XJ, 2007, CELL, V128, P129, DOI 10.1016/j.cell.2006.11.039
   Xing Z, 2014, CELL, V159, P1110, DOI 10.1016/j.cell.2014.10.013
   Ye JZS, 2004, NAT GENET, V36, P618, DOI 10.1038/ng1360
   Yeh TYJ, 2009, DIABETES, V58, P2476, DOI 10.2337/db08-1781
   Yim EK, 2009, CANCER CELL, V15, P304, DOI 10.1016/j.ccr.2009.02.012
   Zhang Y, 2011, NAT CELL BIOL, V13, P623, DOI 10.1038/ncb2222
NR 36
TC 72
Z9 74
U1 0
U2 8
PU COLD SPRING HARBOR LAB PRESS, PUBLICATIONS DEPT
PI COLD SPRING HARBOR
PA 1 BUNGTOWN RD, COLD SPRING HARBOR, NY 11724 USA
SN 0890-9369
EI 1549-5477
J9 GENE DEV
JI Genes Dev.
PD JAN 15
PY 2015
VL 29
IS 2
BP 157
EP 170
DI 10.1101/gad.251785.114
PG 14
WC Cell Biology; Developmental Biology; Genetics & Heredity
WE Science Citation Index Expanded (SCI-EXPANDED)
SC Cell Biology; Developmental Biology; Genetics & Heredity
GA AZ0ZE
UT WOS:000347969500005
PM 25547115
OA Green Published, Green Submitted, gold
DA 2022-04-10
ER

PT J
AU McSkimming, DI
   Dastgheib, S
   Baffi, TR
   Byrne, DP
   Ferries, S
   Scott, ST
   Newton, AC
   Eyers, CE
   Kochut, KJ
   Eyers, PA
   Kannan, N
AF McSkimming, Daniel Ian
   Dastgheib, Shima
   Baffi, Timothy R.
   Byrne, Dominic P.
   Ferries, Samantha
   Scott, Steven Thomas
   Newton, Alexandra C.
   Eyers, Claire E.
   Kochut, Krzysztof J.
   Eyers, Patrick A.
   Kannan, Natarajan
TI KinView: a visual comparative sequence analysis tool for integrated
   kinome research
SO MOLECULAR BIOSYSTEMS
LA English
DT Article
ID PROTEIN-KINASE-C; TYROSINE PHOSPHORYLATION; STRUCTURAL BASIS; CENTRIOLE
   BIOGENESIS; SOMATIC MUTATIONS; CATALYTIC DOMAIN; RESISTANT AURORA;
   ACTIVATION; BINDING; PLK4
AB Multiple sequence alignments (MSAs) are a fundamental analysis tool used throughout biology to investigate relationships between protein sequence, structure, function, evolutionary history, and patterns of disease associated variants. However, their widespread application in systems biology research is currently hindered by the lack of user-friendly tools to simultaneously visualize, manipulate and query the information conceptualized in large sequence alignments, and the challenges in integrating MSAs with multiple orthogonal data such as cancer variants and post-translational modification, which are often stored in heterogeneous data sources and formats. Here, we present the Multiple Sequence Alignment Ontology (MSAOnt), which represents a profile or consensus alignment in an ontological format. Subsets of the alignment are easily selected through the SPARQL Protocol and RDF Query Language for downstream statistical analysis or visualization. We have also created the Kinome Viewer (KinView), an interactive integrative visualization that places eukaryotic protein kinase cancer variants in the context of natural sequence variation and experimentally determined post-translational modification, which play central roles in the regulation of cellular signaling pathway. Using KinView, we identified differential phosphorylation patterns between tyrosine and serine/threonine kinases in the activation segment, a major kinase regulatory region that is often mutated in proliferative diseases. We discuss cancer variants that disrupt phosphorylation sites in the activation segment, and show how KinView can be used as a comparative tool to identify differences and similarities in natural variation, cancer variants and post-translational modification between kinase groups, families and subfamilies. Based on KinView comparisons, we identify and experimentally characterize a regulatory tyrosine (Y177(PLK4)) in the PLK4 C-terminal activation segment region termed the P+1 loop. To further demonstrate the application of KinView in hypothesis generation and testing, we formulate and validate a hypothesis explaining a novel predicted loss-of-function variant (D523NPKCb) in the regulatory spine of PKC beta, a recently identified tumor suppressor kinase. KinView provides a novel, extensible interface for performing comparative analyses between subsets of kinases and for integrating multiple types of residue specific annotations in user friendly formats.
C1 [McSkimming, Daniel Ian; Kannan, Natarajan] Univ Georgia, Inst Bioinformat, Athens, GA 30602 USA.
   [Dastgheib, Shima; Kochut, Krzysztof J.] Univ Georgia, Dept Comp Sci, Athens, GA 30602 USA.
   [Baffi, Timothy R.; Newton, Alexandra C.] Univ Calif San Diego, Dept Pharmacol, La Jolla, CA 92093 USA.
   [Byrne, Dominic P.; Ferries, Samantha; Eyers, Claire E.; Eyers, Patrick A.] Univ Liverpool, Inst Integrat Biol, Dept Biochem, Liverpool, Merseyside, England.
   [Scott, Steven Thomas; Kannan, Natarajan] Univ Georgia, Dept Biochem & Mol Biol, Athens, GA 30602 USA.
RP Kannan, N (corresponding author), Univ Georgia, Inst Bioinformat, Athens, GA 30602 USA.; Kannan, N (corresponding author), Univ Georgia, Dept Biochem & Mol Biol, Athens, GA 30602 USA.
EM nkannan@uga.edu
RI Eyers, Claire/C-6291-2013
OI Eyers, Claire/0000-0002-3223-5926; Baffi, Timothy/0000-0003-2862-6155
FU National Science FoundationNational Science Foundation (NSF)
   [MCB-1149106]; National Institutes of HealthUnited States Department of
   Health & Human ServicesNational Institutes of Health (NIH) - USA
   [GM114409-01, GM3154]; North West Cancer Research [CR1037, CR1088];
   Biotechnology and Biological Sciences Research CouncilUK Research &
   Innovation (UKRI)Biotechnology and Biological Sciences Research Council
   (BBSRC) [BB/M012557/1]; DTP PhD studentship; BBSRCUK Research &
   Innovation (UKRI)Biotechnology and Biological Sciences Research Council
   (BBSRC) [BB/N021703/1, BB/M012557/1] Funding Source: UKRI; MRCUK
   Research & Innovation (UKRI)Medical Research Council UK (MRC)
   [G120/1030] Funding Source: UKRI; NATIONAL INSTITUTE OF GENERAL MEDICAL
   SCIENCESUnited States Department of Health & Human ServicesNational
   Institutes of Health (NIH) - USANIH National Institute of General
   Medical Sciences (NIGMS) [R01GM114409, R01GM043154, T32GM007752] Funding
   Source: NIH RePORTER; Biotechnology and Biological Sciences Research
   CouncilUK Research & Innovation (UKRI)Biotechnology and Biological
   Sciences Research Council (BBSRC) [BB/N021703/1] Funding Source:
   researchfish; Medical Research CouncilUK Research & Innovation
   (UKRI)Medical Research Council UK (MRC)European Commission [G120/1030]
   Funding Source: researchfish
FX Funding for NK from the National Science Foundation (MCB-1149106) and
   National Institutes of Health (GM114409-01) is acknowledged. This work
   was supported by National Institutes of Health grant GM3154- (to ACN),
   North West Cancer Research grants CR1037 and CR1088 (to PAE), and
   Biotechnology and Biological Sciences Research Council project grant
   (BB/M012557/1) and DTP PhD studentship (to CEE).
CR Adzhubei Ivan, 2013, Curr Protoc Hum Genet, VChapter 7, DOI 10.1002/0471142905.hg0720s76
   Adzhubei IA, 2010, NAT METHODS, V7, P248, DOI 10.1038/nmeth0410-248
   Antal CE, 2015, CELL, V160, P489, DOI 10.1016/j.cell.2015.01.001
   Ashburner M, 2000, NAT GENET, V25, P25, DOI 10.1038/75556
   Atasoy S, 2009, LECT NOTES COMPUT SC, V5761, P499, DOI 10.1007/978-3-642-04268-3_62
   Ba ANN, 2010, MOL BIOL EVOL, V27, P2027, DOI 10.1093/molbev/msq090
   Bamford S, 2004, BRIT J CANCER, V91, P355, DOI 10.1038/sj.bjc.6601894
   Bateman A, 2015, NUCLEIC ACIDS RES, V43, pD204, DOI 10.1093/nar/gku989
   Beltrao P, 2013, MOL SYST BIOL, V9, DOI 10.1002/msb.201304521
   Beltrao P, 2012, CELL, V150, P413, DOI 10.1016/j.cell.2012.05.036
   Beltrao P, 2009, PLOS BIOL, V7, DOI 10.1371/journal.pbio.1000134
   Berman HM, 2000, NUCLEIC ACIDS RES, V28, P235, DOI 10.1093/nar/28.1.235
   Bioukar EB, 1999, J BIOL CHEM, V274, P21457, DOI 10.1074/jbc.274.30.21457
   Blom N, 1999, J MOL BIOL, V294, P1351, DOI 10.1006/jmbi.1999.3310
   Breit C, 2015, PLOS ONE, V10, DOI 10.1371/journal.pone.0144673
   Buscemi G, 2004, ONCOGENE, V23, P7691, DOI 10.1038/sj.onc.1207986
   Chen HB, 2007, MOL CELL, V27, P717, DOI 10.1016/j.molcel.2007.06.028
   Chen HB, 2013, CELL REP, V4, P376, DOI 10.1016/j.celrep.2013.06.025
   Chen RY, 2001, J BIOL CHEM, V276, P31858, DOI 10.1074/jbc.C100271200
   Cho JH, 2005, P NATL ACAD SCI USA, V102, P2350, DOI 10.1073/pnas.0409856102
   Chu MLH, 2008, J BIOL CHEM, V283, P21495, DOI 10.1074/jbc.M803026200
   Chu MLH, 2010, BIOCHEMISTRY-US, V49, P1689, DOI 10.1021/bi901970c
   Croft D, 2014, NUCLEIC ACIDS RES, V42, pD472, DOI 10.1093/nar/gkt1102
   Cuff JA, 2000, PROTEINS, V40, P502, DOI 10.1002/1097-0134(20000815)40:3<502::AID-PROT170>3.0.CO;2-Q
   Cuff JA, 1998, BIOINFORMATICS, V14, P892, DOI 10.1093/bioinformatics/14.10.892
   Cunha-Ferreira I, 2009, CURR BIOL, V19, P43, DOI 10.1016/j.cub.2008.11.037
   Davies H, 2002, NATURE, V417, P949, DOI 10.1038/nature00766
   Drummond AJ, 2007, BMC EVOL BIOL, V7, DOI 10.1186/1471-2148-7-214
   Dutil EM, 1998, CURR BIOL, V8, P1366, DOI 10.1016/S0960-9822(98)00017-7
   Endicott JA, 2012, ANNU REV BIOCHEM, V81, P587, DOI 10.1146/annurev-biochem-052410-090317
   Fedorov O, 2011, CHEM BIOL, V18, P67, DOI 10.1016/j.chembiol.2010.11.009
   Forbes SA, 2015, NUCLEIC ACIDS RES, V43, pD805, DOI 10.1093/nar/gku1075
   Furnham N, 2016, J MOL BIOL, V428, P253, DOI 10.1016/j.jmb.2015.11.010
   Gallegos LL, 2006, J BIOL CHEM, V281, P30947, DOI 10.1074/jbc.M603741200
   Gosal G, 2011, PLOS ONE, V6, DOI 10.1371/journal.pone.0028782
   Gouy M, 2010, MOL BIOL EVOL, V27, P221, DOI 10.1093/molbev/msp259
   Guderian G, 2010, J CELL SCI, V123, P2163, DOI 10.1242/jcs.068502
   HANKS SK, 1991, METHOD ENZYMOL, V200, P38
   HANKS SK, 1995, FASEB J, V9, P576, DOI 10.1096/fasebj.9.8.7768349
   Holland AJ, 2012, GENE DEV, V26, P2684, DOI 10.1101/gad.207027.112
   Huang WC, 2003, J BIOL CHEM, V278, P9944, DOI 10.1074/jbc.M208521200
   Huang ZF, 2013, STRUCTURE, V21, P1889, DOI 10.1016/j.str.2013.07.017
   Huse M, 2002, CELL, V109, P275, DOI 10.1016/S0092-8674(02)00741-9
   Jeon YJ, 2010, J BIOL CHEM, V285, P28126, DOI 10.1074/jbc.M110.137190
   Jiang TY, 2003, J BIOL CHEM, V278, P15789, DOI 10.1074/jbc.M212525200
   Johnson EF, 2007, BIOCHEMISTRY-US, V46, P9551, DOI 10.1021/bi7008745
   Johnson JR, 2015, PLOS COMPUT BIOL, V11, DOI 10.1371/journal.pcbi.1004362
   Johnson LN, 1996, CELL, V85, P149, DOI 10.1016/S0092-8674(00)81092-2
   Jones DT, 1999, J MOL BIOL, V292, P195, DOI 10.1006/jmbi.1999.3091
   Jung HS, 2005, MOL ENDOCRINOL, V19, P2748, DOI 10.1210/me.2005-0122
   Kannan N, 2004, PROTEIN SCI, V13, P2059, DOI 10.1110/ps.04637904
   Kannan N, 2007, P NATL ACAD SCI USA, V104, P1272, DOI 10.1073/pnas.0610251104
   Kinstrie R, 2010, SCI SIGNAL, V3, DOI 10.1126/scisignal.2000579
   Klebba JE, 2015, P NATL ACAD SCI USA, V112, pE657, DOI 10.1073/pnas.1417967112
   Klebba JE, 2013, CURR BIOL, V23, P2255, DOI 10.1016/j.cub.2013.09.019
   Kobashigawa Y, 2015, GENES CELLS, V20, P860, DOI 10.1111/gtc.12277
   Konishi H, 1997, P NATL ACAD SCI USA, V94, P11233, DOI 10.1073/pnas.94.21.11233
   Krech, 2006, RDFLIB PYTHON LIB WO
   Kumar S, 2016, MOL BIOL EVOL, V33, P1870, DOI [10.1093/molbev/msw054, 10.1093/molbev/msv279]
   Kumar S, 2012, NAT METHODS, V9, P855, DOI 10.1038/nmeth.2147
   Lai SS, 2016, MOL BIOL CELL, V27, P1040, DOI 10.1091/mbc.E15-07-0527
   Landry CR, 2009, TRENDS GENET, V25, P193, DOI 10.1016/j.tig.2009.03.003
   Lee CH, 2001, J BIOL CHEM, V276, P30537, DOI 10.1074/jbc.M104414200
   Lee TY, 2006, NUCLEIC ACIDS RES, V34, pD622, DOI 10.1093/nar/gkj083
   Lin ZH, 2014, STRUCTURE, V22, P1616, DOI 10.1016/j.str.2014.08.020
   Lisabeth EM, 2012, BIOCHEMISTRY-US, V51, P1464, DOI 10.1021/bi2014079
   Lochhead PA, 2006, MOL CELL, V24, P627, DOI 10.1016/j.molcel.2006.10.009
   Lopes CAM, 2015, DEV CELL, V35, P222, DOI 10.1016/j.devcel.2015.09.020
   Manning G, 2002, SCIENCE, V298, P1912, DOI 10.1126/science.1075762
   Martin CA, 2014, NAT GENET, V46, P1283, DOI 10.1038/ng.3122
   McSkimming DI, 2015, HUM MUTAT, V36, P175, DOI 10.1002/humu.22726
   Meharena HS, 2013, PLOS BIOL, V11, DOI 10.1371/journal.pbio.1001680
   Milacic Marija, 2012, Cancers (Basel), V4, P1180, DOI 10.3390/cancers4041180
   Miller MP, 2003, ANN HUM GENET, V67, P567, DOI 10.1046/j.1529-8817.2003.00072.x
   Miller MP, 2001, HUM MOL GENET, V10, P2319, DOI 10.1093/hmg/10.21.2319
   Mohanty S, 2015, BBA-PROTEINS PROTEOM, V1854, P1575, DOI 10.1016/j.bbapap.2015.03.012
   Moore MJ, 2003, J BIOL CHEM, V278, P10613, DOI 10.1074/jbc.M210807200
   Moyer TC, 2015, J CELL BIOL, V209, P863, DOI 10.1083/jcb.201502088
   Murphy JM, 2014, BIOCHEM J, V457, P323, DOI 10.1042/BJ20131174
   Nakamura T, 2013, NAT COMMUN, V4, DOI 10.1038/ncomms2752
   Natale DA, 2011, NUCLEIC ACIDS RES, V39, pD539, DOI 10.1093/nar/gkq907
   Naud S, 2013, J MED CHEM, V56, P10045, DOI 10.1021/jm401395s
   Newton AC, 2010, AM J PHYSIOL-ENDOC M, V298, pE395, DOI 10.1152/ajpendo.00477.2009
   Nolen B, 2001, NAT STRUCT BIOL, V8, P176, DOI 10.1038/84178
   Notaro R, 2000, FASEB J, V14, P485, DOI 10.1096/fasebj.14.3.485
   Oruganty K, 2013, P NATL ACAD SCI USA, V110, P924, DOI 10.1073/pnas.1207104110
   Pearce LR, 2010, NAT REV MOL CELL BIO, V11, P9, DOI 10.1038/nrm2822
   Ponting CP, 1999, NUCLEIC ACIDS RES, V27, P229, DOI 10.1093/nar/27.1.229
   Reiterer V, 2014, TRENDS CELL BIOL, V24, P489, DOI 10.1016/j.tcb.2014.03.008
   Schmidt HA, 2002, BIOINFORMATICS, V18, P502, DOI 10.1093/bioinformatics/18.3.502
   SCHNEIDER TD, 1990, NUCLEIC ACIDS RES, V18, P6097, DOI 10.1093/nar/18.20.6097
   Scutt PJ, 2009, J BIOL CHEM, V284, P15880, DOI 10.1074/jbc.M109.005694
   Shrestha A, 2012, PROTEIN EXPRES PURIF, V81, P136, DOI 10.1016/j.pep.2011.09.012
   Skjaeveland M.G., 2012, P 9 EXT SEM WEB C ES, P361, DOI [DOI 10.1007/978-3-662-46641-4_27, 10.1007/978-3-662, DOI 10.1007/978-3-662]
   Sloane DA, 2010, ACS CHEM BIOL, V5, P563, DOI 10.1021/cb100053q
   Smith B, 2007, NAT BIOTECHNOL, V25, P1251, DOI 10.1038/nbt1346
   Stecher G, 2014, BIOINFORMATICS, V30, P1305, DOI 10.1093/bioinformatics/btu018
   Sunyaev S, 2001, HUM MOL GENET, V10, P591, DOI 10.1093/hmg/10.6.591
   Tan CSH, 2009, SCI SIGNAL, V2, DOI 10.1126/scisignal.2000316
   Taylor SS, 2004, BBA-PROTEINS PROTEOM, V1697, P259, DOI 10.1016/j.bbapap.2003.11.029
   Thompson JD, 2005, NUCLEIC ACIDS RES, V33, P4164, DOI 10.1093/nar/gki735
   Timm T, 2008, J BIOL CHEM, V283, P18873, DOI 10.1074/jbc.M706596200
   Tyler RK, 2009, BIOCHEM J, V417, P173, DOI 10.1042/BJ20081310
   Violin JD, 2003, J CELL BIOL, V161, P899, DOI 10.1083/jcb.200302125
   Wang N, 2015, ONCOGENE, V34, P5198, DOI 10.1038/onc.2014.443
   Zhai Y., KINBASE
   Zhang XD, 2016, SCI REP-UK, V6, DOI 10.1038/srep20558
NR 107
TC 26
Z9 26
U1 1
U2 8
PU ROYAL SOC CHEMISTRY
PI CAMBRIDGE
PA THOMAS GRAHAM HOUSE, SCIENCE PARK, MILTON RD, CAMBRIDGE CB4 0WF, CAMBS,
   ENGLAND
SN 1742-206X
EI 1742-2051
J9 MOL BIOSYST
JI Mol. Biosyst.
PY 2016
VL 12
IS 12
BP 3651
EP 3665
DI 10.1039/c6mb00466k
PG 15
WC Biochemistry & Molecular Biology
WE Science Citation Index Expanded (SCI-EXPANDED)
SC Biochemistry & Molecular Biology
GA ED6DY
UT WOS:000388946800014
PM 27731453
OA hybrid, Green Accepted, Green Submitted
DA 2022-04-10
ER

PT J
AU Sa, JD
   Trino, LD
   Oliveira, AK
   Lopes, AFB
   Granato, DC
   Normando, AGC
   Santos, ES
   Neves, LX
   Carnielli, CM
   Leme, AFP
AF Sa, Jamile De Oliveira
   Trino, Luciana Daniele
   Oliveira, Ana Karina
   Busso Lopes, Ariane Fidelis
   Granato, Daniela Campos
   Costa Normando, Ana Gabriela
   Santos, Erison Santana
   Neves, Leandro Xavier
   Carnielli, Carolina Moretto
   Paes Leme, Adriana Franco
TI Proteomic approaches to assist in diagnosis and prognosis of oral cancer
SO EXPERT REVIEW OF PROTEOMICS
LA English
DT Review
DE Proteomics; oral cancer; mass spectrometry; biomarkers; tumor
   microenvironment; liquid biopsies; peptidomics; post-translational
   modifications
ID SQUAMOUS-CELL CARCINOMA; PEPTIDE IMMUNOAFFINITY ENRICHMENT; PROTEIN
   BIOMARKER DISCOVERY; CANDIDATE BIOMARKERS; SALIVARY BIOMARKERS;
   N-GLYCOSYLATION; IDENTIFICATION; FIBROBLASTS; MULTIPLEX; MATRIX
AB Introduction: Oral squamous cell carcinoma (OSCC) ranks among the top 10 leading causes of cancer worldwide, with 5-year survival rate of about 50%, high lymph node metastasis, and relapse rates. The OSCC diagnosis, prognosis, and treatment are mostly based on the clinical TNM classification. There is an urgent need for the discovery of biomarkers and therapeutic target to assist in the clinical decision-making process. Areas covered: We summarize proteomic studies of the OSCC tumor, immune microenvironment, potential liquid biopsy sites, and post-translational modification trying to retrieve information in the discovery and verification or (pre)validation phases. The search strategy was based on the combination of MeSH terms and expert refinement. Expert opinion: Untargeted combined with targeted proteomics are strategies that provide reliable and reproducible quantitation of proteins and are the methods of choice of many groups worldwide. Undoubtedly, proteomics has been contributing to the understanding of OSCC progression and uncovers potential candidates as biomarker or therapeutic target. Nevertheless, none of these target are available in the clinical practice yet. The scientific community needs to overcome the limitations by investing in robust experimental designs to strengthen the value of the findings, leveraging the translation of knowledge, and further supporting clinical decisions.
C1 [Sa, Jamile De Oliveira; Trino, Luciana Daniele; Oliveira, Ana Karina; Busso Lopes, Ariane Fidelis; Granato, Daniela Campos; Costa Normando, Ana Gabriela; Santos, Erison Santana; Neves, Leandro Xavier; Carnielli, Carolina Moretto; Paes Leme, Adriana Franco] Ctr Nacl Pesquisa Energia & Mat CNPEM, Lab Nacl Biociencias Lnbio, BR-13083100 Campinas, SP, Brazil.
   [Sa, Jamile De Oliveira; Costa Normando, Ana Gabriela; Santos, Erison Santana] Univ Estadual Campinas UNICAMP, Fac Odontol Piracicaba, Dept Diagnost Oral, Piracicaba, Brazil.
RP Leme, AFP (corresponding author), Ctr Nacl Pesquisa Energia & Mat CNPEM, Lab Nacl Biociencias Lnbio, BR-13083100 Campinas, SP, Brazil.
EM adriana.paesleme@Inbio.cnpem.br
RI Neves, LX/G-4507-2013; Oliveira, Ana K/H-5442-2015; Leme, Adriana F
   Paes/C-9679-2012; Lopes, Ariane Fidelis Busso/K-1383-2015; Oliveira, Ana
   Karina/H-8901-2016; Trino, Luciana Daniele/L-6713-2018; Santos,
   Erison/P-9057-2018
OI Neves, LX/0000-0002-6074-1025; Leme, Adriana F Paes/0000-0001-7959-147X;
   Lopes, Ariane Fidelis Busso/0000-0003-2280-1848; Oliveira, Ana
   Karina/0000-0001-6837-5739; Trino, Luciana Daniele/0000-0002-5838-0443;
   Moretto Carnielli, Carolina/0000-0001-8336-7390; Sa,
   Jamile/0000-0002-5807-4403; Santos, Erison/0000-0002-2088-1912;
   Normando, Ana Gabriela/0000-0002-0307-4991
FU Fundacao de Amparo a Pesquisa do Estado de Sao Paulo, FAPESPFundacao de
   Amparo a Pesquisa do Estado de Sao Paulo (FAPESP) [2018/15728-3,
   2018/12194-8, 2016/19337-3, 2019/21815-9, 2018/15535-0, 2019/18751-9,
   2019/09692-9, 2018/11958-4, 2018/02180-0, 2018/18496-6]; Coordenacao de
   Aperfeicoamento de Pessoal de Nivel Superior, CAPESCoordenacao de
   Aperfeicoamento de Pessoal de Nivel Superior (CAPES)
   [88887.511388/2020-00]; Conselho Nacional de Desenvolvimento Cientifico
   e Tecnologico, CNPqConselho Nacional de Desenvolvimento Cientifico e
   Tecnologico (CNPQ) [142057/2019-3, 305851/20179]
FX This work was financially supported by Fundacao de Amparo a Pesquisa do
   Estado de Sao Paulo, FAPESP (grants: 2018/15728-3, 2018/12194-8,
   2016/19337-3, 2019/21815-9, 2018/15535-0, 2019/18751-9, 2019/09692-9;
   2018/11958-4, 2018/02180-0, and 2018/18496-6), Coordenacao de
   Aperfeicoamento de Pessoal de Nivel Superior, CAPES (grant
   88887.511388/2020-00), and Conselho Nacional de Desenvolvimento
   Cientifico e Tecnologico, CNPq (grants 142057/2019-3 and 305851/20179).
CR Ahmed SQ, 2018, INT ARCH OTORHINOLAR, V22, P136, DOI 10.1055/s-0037-1603626
   Alves A, 2021, ORAL ONCOL, V112, DOI 10.1016/j.oraloncology.2020.105038
   Anderson NM, 2020, CURR BIOL, V30, pR921, DOI 10.1016/j.cub.2020.06.081
   Aragao AZB, 2012, J BIOL CHEM, V287, P43071, DOI 10.1074/jbc.M112.364513
   Arellano-Garcia ME, 2010, INT J MOL SCI, V11, P3106, DOI 10.3390/ijms11093106
   Bagordakis E, 2016, TUMOR BIOL, V37, P9045, DOI 10.1007/s13277-015-4629-y
   Bedford MT, 2009, MOL CELL, V33, P1, DOI 10.1016/j.molcel.2008.12.013
   Binnewies M, 2018, NAT MED, V24, P541, DOI 10.1038/s41591-018-0014-x
   Boersema PJ, 2009, NAT PROTOC, V4, P484, DOI 10.1038/nprot.2009.21
   Capote A, 2007, HEAD NECK-J SCI SPEC, V29, P3, DOI 10.1002/hed.20482
   Carnielli CM, 2018, NAT COMMUN, V9, DOI 10.1038/s41467-018-05696-2
   Carr SA, 2014, MOL CELL PROTEOMICS, V13, P907, DOI 10.1074/mcp.M113.036095
   Chang SC, 2019, J FOOD DRUG ANAL, V27, P483, DOI 10.1016/j.jfda.2018.12.008
   Chen JT, 2015, P NATL ACAD SCI USA, V112, P13057, DOI 10.1073/pnas.1516991112
   Chen YT, 2017, MOL CELL PROTEOMICS, V16, P799, DOI 10.1074/mcp.M116.064758
   Chen YT, 2013, CLIN CHIM ACTA, V420, P45, DOI 10.1016/j.cca.2012.10.019
   Cheng AJ, 2005, CLIN CHEM, V51, P2236, DOI 10.1373/clinchem.2005.052324
   Chi LM, 2020, J PROTEOMICS, V211, DOI 10.1016/j.jprot.2019.103571
   Choi M, 2020, NAT METHODS, V17, P981, DOI 10.1038/s41592-020-0955-0
   Chu HW, 2019, MOL CELL PROTEOMICS, V18, P1796, DOI 10.1074/mcp.RA119.001530
   Cirillo N, 2017, CARCINOGENESIS, V38, P76, DOI 10.1093/carcin/bgw113
   Cocucci E, 2015, TRENDS CELL BIOL, V25, P364, DOI 10.1016/j.tcb.2015.01.004
   Cramer JD, 2019, NAT REV CLIN ONCOL, V16, P669, DOI 10.1038/s41571-019-0227-z
   Cssz E, 2017, PLOS ONE, V12
   Deutsch EW, 2008, EMBO REP, V9, P429, DOI 10.1038/embor.2008.56
   Dong T, 2017, BIOSENS BIOELECTRON, V94, P321, DOI 10.1016/j.bios.2017.03.005
   Flores IL, 2016, CLIN SCI, V130, P785, DOI 10.1042/CS20150646
   Fuster MM, 2005, NAT REV CANCER, V5, P526, DOI 10.1038/nrc1649
   Gallien S, 2015, MOL CELL PROTEOMICS, V14, P1630, DOI 10.1074/mcp.O114.043968
   Gillette MA, 2013, NAT METHODS, V10, P28, DOI 10.1038/nmeth.2309
   Graizel D, 2020, ORAL DIS, V26, P733, DOI 10.1111/odi.13140
   Granato DC, 2014, PLOS ONE, V9, DOI 10.1371/journal.pone.0098208
   Grassl N, 2016, GENOME MED, V8, DOI 10.1186/s13073-016-0293-0
   Guerreiro EM, 2020, PLOS ONE, V15, DOI 10.1371/journal.pone.0238591
   Hanahan D, 2012, CANCER CELL, V21, P309, DOI 10.1016/j.ccr.2012.02.022
   Hardt M, 2011, PROTEOM CLIN APPL, V5, P636, DOI 10.1002/prca.201100015
   Hasanzadeh M, 2017, TRAC-TREND ANAL CHEM, V91, P125, DOI 10.1016/j.trac.2017.04.007
   Heitzer E, 2019, NAT REV GENET, V20, P71, DOI 10.1038/s41576-018-0071-5
   Helm O, 2014, INT J CANCER, V135, P843, DOI 10.1002/ijc.28736
   Heyer R, 2019, FRONT MICROBIOL, V10, DOI 10.3389/fmicb.2019.01883
   Holman SW, 2012, BIOANALYSIS, V4, P1763, DOI 10.4155/BIO.12.126
   Hoover H, 2015, J PROTEOME RES, V14, P3670, DOI 10.1021/acs.jproteome.5b00508
   Hsiao YC, 2020, ANAL CHIM ACTA, V1100, P118, DOI 10.1016/j.aca.2019.12.006
   Hsiao YC, 2018, PROTEOM CLIN APPL, V12, DOI 10.1002/prca.201700039
   Hsiao YC, 2017, MOL CELL PROTEOMICS, V16, P1829, DOI 10.1074/mcp.RA117.000147
   Hsu CW, 2019, MOL CELL PROTEOMICS, V18, P1939, DOI 10.1074/mcp.RA119.001654
   Huang C, 2021, CANCER CELL, V39, P361, DOI 10.1016/j.ccell.2020.12.007
   Huang X, 2006, ORAL ONCOL, V42, P26, DOI 10.1016/j.oraloncology.2005.06.005
   Isayeva T, 2012, HEAD NECK PATHOL, V6, pS104, DOI 10.1007/s12105-012-0368-1
   Jamal B, 2012, ORAL ONCOL, V48, P523, DOI 10.1016/j.oraloncology.2012.01.010
   Jeske SS, 2020, CANCER IMMUNOL IMMUN, V69, P1205, DOI 10.1007/s00262-020-02535-6
   Jessie K, 2013, ELECTROPHORESIS, V34, P2495, DOI 10.1002/elps.201300107
   Jiang WP, 2015, BIOSCIENCE REP, V35, DOI 10.1042/BSR20150023
   Kawahara R, 2017, J PROTEOMICS, V151, P53, DOI 10.1016/j.jprot.2016.08.017
   Kawahara R, 2015, ONCOTARGET, V6, P43635, DOI 10.18632/oncotarget.6018
   Kawahara R, 2016, PROTEOMICS, V16, P159, DOI 10.1002/pmic.201500224
   Kawahara R, 2014, J PROTEOME RES, V13, P2080, DOI 10.1021/pr401224u
   Kayamori K, 2016, PLOS ONE, V11, DOI 10.1371/journal.pone.0154112
   Keller S, 2011, J TRANSL MED, V9, DOI 10.1186/1479-5876-9-86
   Kellermann MG, 2008, ORAL ONCOL, V44, P509, DOI 10.1016/j.oraloncology.2007.07.001
   Kessenbrock K, 2010, CELL, V141, P52, DOI 10.1016/j.cell.2010.03.015
   Khoo XH, 2019, CANCERS, V11, DOI 10.3390/cancers11081166
   Kleifeld O, 2010, NAT BIOTECHNOL, V28, P281, DOI 10.1038/nbt.1611
   Koblinski JE, 2000, CLIN CHIM ACTA, V291, P113, DOI 10.1016/S0009-8981(99)00224-7
   Koike H, 2005, INT J ONCOL, V27, P59
   Kondoh N, 2019, JPN DENT SCI REV, V55, P113, DOI 10.1016/j.jdsr.2019.09.001
   Kraut A, 2019, METHODS MOL BIOL, V1959, P129, DOI 10.1007/978-1-4939-9164-8_9
   Lesur A, 2021, ANAL CHEM, V93, P1383, DOI 10.1021/acs.analchem.0c03180
   Li CP, 2019, CANCER EPIDEM BIOMAR, V28, P1668, DOI 10.1158/1055-9965.EPI-18-1122
   Lin YT, 2020, CHEMOSENSORS, V8, DOI 10.3390/chemosensors8030054
   Liu GL, 2013, J BIOL CHEM, V288, P20217, DOI 10.1074/jbc.M113.473785
   Lopez-Otin C, 2002, NAT REV MOL CELL BIO, V3, P509, DOI 10.1038/nrm858
   Macklin A, 2020, CLIN PROTEOM, V17, DOI 10.1186/s12014-020-09283-w
   Millan O., 2015, GEN METHODS BIOMARKE, P141
   Moller A, 2020, NAT REV CANCER, V20, P697, DOI 10.1038/s41568-020-00299-w
   Mutschelknaus L, 2017, SCI REP-UK, V7, DOI 10.1038/s41598-017-12403-6
   Naba A, 2016, MATRIX BIOL, V49, P10, DOI 10.1016/j.matbio.2015.06.003
   Nejman D, 2020, SCIENCE, V368, P973, DOI 10.1126/science.aay9189
   Neves G, 2021, CLIN NEUROL NEUROSUR, V200, DOI 10.1016/j.clineuro.2020.106382
   Newell EW, 2018, CANCER IMMUNOL RES, V6, P2, DOI 10.1158/2326-6066.CIR-17-0519
   Nita-Lazar M, 2009, CANCER RES, V69, P5673, DOI 10.1158/0008-5472.CAN-08-4512
   Ono K, 2018, J CELL BIOCHEM, V119, P7350, DOI 10.1002/jcb.27039
   Pawson T, 2005, TRENDS BIOCHEM SCI, V30, P286, DOI 10.1016/j.tibs.2005.04.013
   Pentenero M, 2005, HEAD NECK-J SCI SPEC, V27, P1080, DOI 10.1002/hed.20275
   Peterson AC, 2012, MOL CELL PROTEOMICS, V11, P1475, DOI 10.1074/mcp.O112.020131
   Principe S, 2018, J PROTEOME RES, V17, P2045, DOI 10.1021/acs.jproteome.7b00925
   Rackaityte E, 2020, NAT COMMUN, V11, DOI 10.1038/s41467-020-18983-8
   Reily C, 2019, NAT REV NEPHROL, V15, P346, DOI 10.1038/s41581-019-0129-4
   Rifai N, 2006, NAT BIOTECHNOL, V24, P971, DOI 10.1038/nbt1235
   Rivera C, 2018, BRIT J CANCER, V118, P1628, DOI 10.1038/s41416-018-0135-5
   Rodrigues-Lisoni FC, 2010, BMC MED GENOMICS, V3, DOI 10.1186/1755-8794-3-14
   Roman E, 2013, ANTICANCER RES, V33, P837
   Ronsein GE, 2015, J PROTEOMICS, V113, P388, DOI 10.1016/j.jprot.2014.10.017
   Sato S, 2019, JCI INSIGHT, V4, DOI 10.1172/jci.insight.132447
   Schilling O, 2010, NAT METHODS, V7, P508, DOI [10.1038/NMETH.1467, 10.1038/nmeth.1467]
   Sevenich L, 2014, GENE DEV, V28, P2331, DOI 10.1101/gad.250647.114
   Shan J, 2019, ORAL DIS, V25, P97, DOI 10.1111/odi.12971
   Sharma V, 2014, J PROTEOME RES, V13, P4205, DOI 10.1021/pr5006636
   Shintani S, 2010, INT J ORAL MAX SURG, V39, P68, DOI 10.1016/j.ijom.2009.10.001
   Simabuco FM, 2014, MOL CANCER, V13, DOI 10.1186/1476-4598-13-24
   Sinevici N, 2019, GLYCOBIOLOGY, V29, P726, DOI 10.1093/glycob/cwz046
   Sinha S, 2016, J CELL BIOL, V214, P197, DOI 10.1083/jcb.201601025
   Sivadasan P, 2020, J PROTEOMICS, V212, DOI 10.1016/j.jprot.2019.103574
   Slavov N, 2020, SCIENCE, V367, P512, DOI 10.1126/science.aaz6695
   Smith BAH, 2021, NAT REV DRUG DISCOV, V20, P217, DOI 10.1038/s41573-020-00093-1
   Sobral LM, 2011, ORAL ONCOL, V47, P840, DOI 10.1016/j.oraloncology.2011.06.011
   Staes A, 2008, PROTEOMICS, V8, P1362, DOI 10.1002/pmic.200700950
   Sun G, 2009, ARTIF CELL BLOOD SUB, V37, P125, DOI 10.1080/10731190902913759
   Sung H, 2021, CA-CANCER J CLIN, V71, P209, DOI 10.3322/caac.21660
   Swatek KN, 2016, CELL RES, V26, P399, DOI 10.1038/cr.2016.39
   Takahashi H, 2017, ONCOTARGET, V8, P8633, DOI 10.18632/oncotarget.14374
   Thaysen-Andersen M, 2016, MOL CELL PROTEOMICS, V15, P1773, DOI 10.1074/mcp.O115.057638
   Theodoraki MN, 2018, CLIN EXP IMMUNOL, V194, P67, DOI 10.1111/cei.13157
   Tseng MY, 2009, ORAL ONCOL, V45, P771, DOI 10.1016/j.oraloncology.2008.11.013
   Tung CL, 2013, J PHARMACEUT BIOMED, V75, P7, DOI 10.1016/j.jpba.2012.11.017
   Turhani D, 2006, ELECTROPHORESIS, V27, P1417, DOI 10.1002/elps.200500510
   Uversky VN., 2013, BRENNERS ENCY GENETI, P425, DOI DOI 10.1016/B978-0-12-374984-0.01203-1
   van der Waal Isaac, 2013, Med Oral Patol Oral Cir Bucal, V18, pe33
   Varki, 2017, ESSENTIALS GLYCOBIOL, DOI DOI 10.1101/GLYCOBIOLOGY.3E.015
   Verberkmoes NC, 2009, ISME J, V3, P179, DOI 10.1038/ismej.2008.108
   Vered M, 2010, CANCER SCI, V101, P274, DOI 10.1111/j.1349-7006.2009.01357.x
   Vizcaino JA, 2014, NAT BIOTECHNOL, V32, P223, DOI 10.1038/nbt.2839
   Wang SH, 2019, INT J CANCER, V144, P2795, DOI 10.1002/ijc.32027
   Wang YN, 2018, ORAL ONCOL, V76, P34, DOI 10.1016/j.oraloncology.2017.11.024
   Wei F, 2009, CLIN CANCER RES, V15, P4446, DOI 10.1158/1078-0432.CCR-09-0050
   Weng SSH, 2019, MOL CELL PROTEOMICS, V18, P2335, DOI 10.1074/mcp.TIR119.001560
   Whiteaker JR, 2015, MOL CELL PROTEOMICS, V14, P2261, DOI 10.1074/mcp.O115.050351
   Winck FV, 2015, SCI REP-UK, V5, DOI 10.1038/srep16305
   Winck FV, 2014, J PROTEOMICS, V96, P67, DOI 10.1016/j.jprot.2013.10.039
   Wong YL, 2021, GLYCOCONJUGATE J, V38, P1, DOI 10.1007/s10719-021-09973-z
   Wu CC, 2015, PROTEOMICS, V15, P3394, DOI 10.1002/pmic.201500157
   Xiao H, 2015, ORAL ONCOL, V51, P1011, DOI 10.1016/j.oraloncology.2015.08.008
   Xiao M, 2018, J EXP CLIN CANC RES, V37, DOI 10.1186/s13046-018-0815-2
   Xie HW, 2008, MOL CELL PROTEOMICS, V7, P486, DOI 10.1074/mcp.M700146-MCP200
   Yan M, 2013, MOL CELL PROTEOMICS, V12, P3271, DOI 10.1074/mcp.M112.025460
   Yang S, 2020, INT J BIOL SCI, V16, P1767, DOI 10.7150/ijbs.41105
   Yang Y, 2014, PLOS ONE, V9, DOI 10.1371/journal.pone.0095389
   Yates John R 3rd, 2019, F1000Res, V8, DOI 10.12688/f1000research.16987.1
   Yu JS, 2016, P NATL ACAD SCI USA, V113, P11549, DOI 10.1073/pnas.1612368113
   Yuen APW, 2002, HEAD NECK-J SCI SPEC, V24, P513, DOI 10.1002/hed.10094
   Zaborowski MP, 2015, BIOSCIENCE, V65, P783, DOI 10.1093/biosci/biv084
   Zhan T, 2017, ONCOGENE, V36, P1461, DOI 10.1038/onc.2016.304
   Zhang Lifeng, 2008, Open Proteomics J, V1, P72, DOI 10.2174/1875039700801010072
   Zhong L, 2018, BMC CANCER, V18, DOI 10.1186/s12885-018-4806-7
   Zhu XQ, 2020, INT J MOL MED, V46, P2115, DOI 10.3892/ijmm.2020.4736
NR 145
TC 1
Z9 1
U1 3
U2 4
PU TAYLOR & FRANCIS LTD
PI ABINGDON
PA 2-4 PARK SQUARE, MILTON PARK, ABINGDON OR14 4RN, OXON, ENGLAND
SN 1478-9450
EI 1744-8387
J9 EXPERT REV PROTEOMIC
JI Expert Rev. Proteomics
PD APR 3
PY 2021
VL 18
IS 4
BP 261
EP 284
DI 10.1080/14789450.2021.1924685
EA MAY 2021
PG 24
WC Biochemical Research Methods
WE Science Citation Index Expanded (SCI-EXPANDED)
SC Biochemistry & Molecular Biology
GA SM9KP
UT WOS:000651694900001
PM 33945368
DA 2022-04-10
ER

PT J
AU Gupta, R
   Leon, F
   Rauth, S
   Batra, SK
   Ponnusamy, MP
AF Gupta, Rohitesh
   Leon, Frank
   Rauth, Sanchita
   Batra, Surinder K.
   Ponnusamy, Moorthy P.
TI A Systematic Review on the Implications of O-linked Glycan Branching and
   Truncating Enzymes on Cancer Progression and Metastasis
SO CELLS
LA English
DT Review
DE glycosylation; cancer; metastasis
ID SIALYL-TN ANTIGEN; CORE 2 BETA-1,6-N-ACETYLGLUCOSAMINYLTRANSFERASE;
   TUMOR-ASSOCIATED GLYCOPROTEIN-72; BREAST-CANCER; COLORECTAL-CANCER;
   PANCREATIC-CANCER; SIALOSYL-TN; CARCINOMA CELLS; DOWN-REGULATION;
   ST6GALNAC I
AB Glycosylation is the most commonly occurring post-translational modification, and is believed to modify over 50% of all proteins. The process of glycan modification is directed by different glycosyltransferases, depending on the cell in which it is expressed. These small carbohydrate molecules consist of multiple glycan families that facilitate cell-cell interactions, protein interactions, and downstream signaling. An alteration of several types of O-glycan core structures have been implicated in multiple cancers, largely due to differential glycosyltransferase expression or activity. Consequently, aberrant O-linked glycosylation has been extensively demonstrated to affect biological function and protein integrity that directly result in cancer growth and progression of several diseases. Herein, we provide a comprehensive review of several initiating enzymes involved in the synthesis of O-linked glycosylation that significantly contribute to a number of different cancers.
C1 [Gupta, Rohitesh; Leon, Frank; Rauth, Sanchita; Batra, Surinder K.; Ponnusamy, Moorthy P.] Univ Nebraska Med Ctr, Dept Biochem & Mol Biol, Omaha, NE 68105 USA.
   [Batra, Surinder K.; Ponnusamy, Moorthy P.] Univ Nebraska Med Ctr, Eppley Inst Res Canc & Allied Dis, Fred & Pamela Buffett Canc Ctr, Omaha, NE 68198 USA.
   [Batra, Surinder K.] UNMC, Dept Pathol & Microbiol, Omaha, NE 68198 USA.
RP Batra, SK; Ponnusamy, MP (corresponding author), Univ Nebraska Med Ctr, Dept Biochem & Mol Biol, Omaha, NE 68105 USA.; Batra, SK; Ponnusamy, MP (corresponding author), Univ Nebraska Med Ctr, Eppley Inst Res Canc & Allied Dis, Fred & Pamela Buffett Canc Ctr, Omaha, NE 68198 USA.; Batra, SK (corresponding author), UNMC, Dept Pathol & Microbiol, Omaha, NE 68198 USA.
EM rohitesh.gupta@gmail.com; frank.leon@unmc.edu; sanchita.rauth@unmc.edu;
   sbatra@unmc.edu; mpalanim@unmc.edu
OI gupta, rohitesh/0000-0001-8515-5869; Batra, Surinder
   K./0000-0001-9470-9317
FU National Institutes of HealthUnited States Department of Health & Human
   ServicesNational Institutes of Health (NIH) - USA [P01 CA217798, R01
   CA210637, R01 CA183459, R01 CA195586, R01 CA201444, R01 CA228524, U01
   CA200466, U01 CA210240]
FX The authors in this manuscript are supported, in parts, by the grants
   from National Institutes of Health (This work was supported, in parts,
   by the National Institutes of Health (P01 CA217798, R01 CA210637, R01
   CA183459, R01 CA195586, R01 CA201444, R01 CA228524, U01 CA200466, and
   U01 CA210240).
CR Akamine S, 2004, ANTICANCER RES, V24, P2541
   Akita K, 2012, INT J GYNECOL CANCER, V22, P531, DOI 10.1097/IGC.0b013e3182473292
   An GY, 2007, J EXP MED, V204, P1417, DOI 10.1084/jem.20061929
   An YH, 2013, J IMMUNOTHER, V36, P20, DOI 10.1097/CJI.0b013e31827810d1
   Barrow H, 2013, PLOS ONE, V8, DOI 10.1371/journal.pone.0059792
   Bergstrom K, 2016, GASTROENTEROLOGY, V151, P152, DOI 10.1053/j.gastro.2016.03.039
   Bernardo C, 2014, ANTICANCER RES, V34, P735
   Beum PV, 1999, J BIOL CHEM, V274, P24641, DOI 10.1074/jbc.274.35.24641
   BIERHUIZEN MFA, 1992, P NATL ACAD SCI USA, V89, P9326, DOI 10.1073/pnas.89.19.9326
   Bousfield G.R., 2014, J GLYCOMICS LIPIDOMI, P4, DOI 10.4172/2153-0637.1000125
   BROCKHAUSEN I, 1995, EUR J BIOCHEM, V233, P607, DOI 10.1111/j.1432-1033.1995.607_2.x
   Brockhausen I, 2009, ESSENTIALS GLYCOBIOL
   Buffone A, 2013, J BIOL CHEM, V288, P1620, DOI 10.1074/jbc.M112.400929
   Carrascal MA, 2014, MOL ONCOL, V8, P753, DOI 10.1016/j.molonc.2014.02.008
   Chandrasekaran EV, 2006, CARBOHYD RES, V341, P983, DOI 10.1016/j.carres.2006.02.017
   Chao CC, 2017, FEBS LETT, V591, P1902, DOI 10.1002/1873-3468.12685
   Chen ZX, 2014, PROSTATE, V74, P1059, DOI 10.1002/pros.22826
   CHO SH, 1994, CANCER RES, V54, P6302
   Chou CH, 2017, INT J GYNECOL CANCER, V27, P863, DOI 10.1097/IGC.0000000000000965
   Chou CH, 2015, ONCOTARGET, V6, P6123, DOI 10.18632/oncotarget.3045
   Chugh S, 2018, GASTROENTEROLOGY, V155, P1608, DOI 10.1053/j.gastro.2018.08.007
   Chugh S, 2015, BBA-REV CANCER, V1856, P211, DOI 10.1016/j.bbcan.2015.08.003
   CONTEGIACOMO A, 1994, EUR J CANCER, V30A, P813, DOI 10.1016/0959-8049(94)90298-4
   Conze T, 2010, GLYCOBIOLOGY, V20, P199, DOI 10.1093/glycob/cwp161
   Corfield A, 2017, HISTOCHEM CELL BIOL, V147, P119, DOI 10.1007/s00418-016-1526-4
   Costa C, 2015, PLOS ONE, V10, DOI 10.1371/journal.pone.0141253
   Cotton S, 2017, MOL ONCOL, V11, P895, DOI 10.1002/1878-0261.12035
   Dalziel M, 2001, J BIOL CHEM, V276, P11007, DOI 10.1074/jbc.M006523200
   Datta AK, 2009, CURR DRUG target, V10, P483, DOI 10.2174/138945009788488422
   DATTI A, 1993, J BIOL CHEM, V268, P5409
   DAVID L, 1992, APMIS, V100, P162
   de las Rivas M, 2019, CURR OPIN STRUC BIOL, V56, P87, DOI 10.1016/j.sbi.2018.12.007
   Dong XC, 2018, BIOMED RES INT, V2018, DOI 10.1155/2018/9532389
   Eavarone DA, 2018, PLOS ONE, V13, DOI 10.1371/journal.pone.0201314
   Ferreira JA, 2013, MOL ONCOL, V7, P719, DOI 10.1016/j.molonc.2013.03.001
   Gao N, 2016, AM J PHYSIOL-GASTR L, V311, pG74, DOI 10.1152/ajpgi.00060.2016
   Gao Y, 2013, BBA-GEN SUBJECTS, V1830, P4274, DOI 10.1016/j.bbagen.2013.04.001
   Gil GC, 2009, PROTEOMICS, V9, P2555, DOI 10.1002/pmic.200800775
   Gonzalez-Vallinas M, 2015, EUR J CANCER, V51, P1, DOI 10.1016/j.ejca.2014.10.021
   Gonzalez-Vallinas M, 2014, PLOS ONE, V9, DOI 10.1371/journal.pone.0098556
   Gupta R, 2016, BIOCHEM BIOPH RES CO, V469, P606, DOI 10.1016/j.bbrc.2015.11.130
   Heimburg-Molinaro J, 2011, VACCINE, V29, P8802, DOI 10.1016/j.vaccine.2011.09.009
   Huang J, 2014, MOL CARCINOGEN, V53, pE62, DOI 10.1002/mc.22011
   Huang MC, 2006, ONCOGENE, V25, P3267, DOI 10.1038/sj.onc.1209350
   Huang YW, 2017, J AM CHEM SOC, V139, P12947, DOI 10.1021/jacs.7b03868
   Hung JS, 2014, ONCOTARGET, V5, P2096, DOI 10.18632/oncotarget.1815
   Ibrahim NK, 2013, J CANCER, V4, P577, DOI 10.7150/jca.7028
   Ikehara Y, 1999, GLYCOBIOLOGY, V9, P1213, DOI 10.1093/glycob/9.11.1213
   ITZKOWITZ SH, 1990, CANCER-AM CANCER SOC, V66, P1960, DOI 10.1002/1097-0142(19901101)66:9<1960::AID-CNCR2820660919>3.0.CO;2-X
   Iwai T, 2005, P NATL ACAD SCI USA, V102, P4572, DOI 10.1073/pnas.0407983102
   Jiang YL, 2018, J CELL MOL MED, V22, P4875, DOI 10.1111/jcmm.13752
   Ju TZ, 2008, CANCER RES, V68, P1636, DOI 10.1158/0008-5472.CAN-07-2345
   Ju TZ, 2013, PROTEOM CLIN APPL, V7, P618, DOI 10.1002/prca.201300024
   Julien S, 2006, GLYCOBIOLOGY, V16, P54, DOI 10.1093/glycob/cwj033
   Julien S, 2005, BREAST CANCER RES TR, V90, P77, DOI 10.1007/s10549-004-3137-3
   Julien S, 2001, GLYCOCONJUGATE J, V18, P883, DOI 10.1023/A:1022200525695
   Julien S, 2009, BRIT J CANCER, V100, P1746, DOI 10.1038/sj.bjc.6605083
   Julien S, 2012, BIOMOLECULES, V2, P435, DOI 10.3390/biom2040435
   Kaur S, 2013, NAT REV GASTRO HEPAT, V10, P607, DOI 10.1038/nrgastro.2013.120
   Kinney AY, 1997, CANCER-AM CANCER SOC, V80, P2240, DOI 10.1002/(SICI)1097-0142(19971215)80:12<2240::AID-CNCR4>3.0.CO;2-Y
   Lannoo N, 2015, PLANT SCI, V239, P67, DOI 10.1016/j.plantsci.2015.06.023
   Lee MM, 2014, J BIOL CHEM, V289, P8742, DOI 10.1074/jbc.C113.546713
   Lee SH, 2009, J BIOL CHEM, V284, P17157, DOI 10.1074/jbc.M109.010934
   Leivonen M, 2001, ONCOLOGY-BASEL, V61, P299, DOI 10.1159/000055337
   Lima L, 2013, BRIT J CANCER, V109, P2106, DOI 10.1038/bjc.2013.571
   Lima L, 2017, UROL ONCOL-SEMIN ORI, V35, DOI 10.1016/j.urolonc.2017.08.012
   Lin MC, 2018, ONCOGENE, V37, P5780, DOI 10.1038/s41388-018-0375-0
   Liu CH, 2014, PLOS ONE, V9, DOI 10.1371/journal.pone.0094995
   Liu G, 2008, BIOINFORMATICS, V24, P2740, DOI 10.1093/bioinformatics/btn515
   Lo CY, 2013, J BIOL CHEM, V288, P13974, DOI 10.1074/jbc.M113.463653
   Marathe DD, 2008, FASEB J, V22, P4154, DOI 10.1096/fj.07-104257
   Marcos NT, 2004, CANCER RES, V64, P7050, DOI 10.1158/0008-5472.CAN-04-1921
   Marcos NT, 2003, J HISTOCHEM CYTOCHEM, V51, P761, DOI 10.1177/002215540305100607
   Marcos Nuno T, 2011, Front Biosci (Elite Ed), V3, P1443
   Mihalache A, 2015, FRONT ONCOL, V5, DOI 10.3389/fonc.2015.00217
   Milde-Langosch K, 2015, BREAST CANCER RES TR, V151, P515, DOI 10.1007/s10549-015-3425-0
   Munkley J, 2016, EBIOMEDICINE, V8, P103, DOI 10.1016/j.ebiom.2016.04.018
   Munkley J, 2015, ONCOTARGET, V6, P34358, DOI 10.18632/oncotarget.6024
   Nakagoe T, 2002, DIGEST DIS SCI, V47, P322, DOI 10.1023/A:1013765904875
   Nakamura K, 2015, ANTICANCER RES, V35, P1411
   Neelamegham S, 2011, GLYCOBIOLOGY, V21, P1541, DOI 10.1093/glycob/cwr036
   Neves M, 2019, NEW BIOTECHNOL, V49, P77, DOI 10.1016/j.nbt.2018.09.004
   Ogawa T, 2017, ONCOTARGET, V8, P112550, DOI 10.18632/oncotarget.22545
   Okamoto T, 2013, MOL MED REP, V7, P359, DOI 10.3892/mmr.2012.1189
   Peixoto A, 2016, ONCOTARGET, V7, P63138, DOI 10.18632/oncotarget.11257
   Pinho SS, 2015, NAT REV CANCER, V15, P540, DOI 10.1038/nrc3982
   Pinho S, 2007, CANCER LETT, V249, P157, DOI 10.1016/j.canlet.2006.08.010
   Pinto R, 2015, LAB INVEST, V95, P718, DOI 10.1038/labinvest.2015.52
   Pinto R, 2012, J CELL MOL MED, V16, P1474, DOI 10.1111/j.1582-4934.2011.01436.x
   Radhakrishnan P, 2014, P NATL ACAD SCI USA, V111, pE4066, DOI 10.1073/pnas.1406619111
   Radhakrishnan P, 2013, INT J CANCER, V133, P2824, DOI 10.1002/ijc.28322
   Radhakrishnan P, 2011, BIOCHEM BIOPH RES CO, V409, P436, DOI 10.1016/j.bbrc.2011.05.019
   Rao CV, 2016, CANCER RES, V76, P1965, DOI 10.1158/0008-5472.CAN-15-2820
   Reily C, 2019, NAT REV NEPHROL, V15, P346, DOI 10.1038/s41581-019-0129-4
   Remmers N, 2013, CLIN CANCER RES, V19, P1981, DOI 10.1158/1078-0432.CCR-12-2662
   Robbe-Masselot C, 2009, J PROTEOME RES, V8, P702, DOI 10.1021/pr800740j
   SANGADALA S, 1991, MOL CELL BIOCHEM, V101, P125
   Santos-Silva F, 2005, GLYCOBIOLOGY, V15, P511, DOI 10.1093/glycob/cwi027
   Sato T, 2016, BIOCHEM BIOPH RES CO, V470, P150, DOI 10.1016/j.bbrc.2016.01.011
   Severino PF, 2017, ONCOTARGET, V8, P54506, DOI 10.18632/oncotarget.17138
   Sewell R, 2006, J BIOL CHEM, V281, P3586, DOI 10.1074/jbc.M511826200
   Shimodaira K, 1997, CANCER RES, V57, P5201
   Soares R, 1996, PATHOL RES PRACT, V192, P1181, DOI 10.1016/S0344-0338(96)80148-8
   Solatycka A, 2012, GLYCOBIOLOGY, V22, P1042, DOI 10.1093/glycob/cws075
   Song K, 2015, J BIOL CHEM, V290, P20159, DOI 10.1074/jbc.M115.654483
   St Hill CA, 2009, BMC CANCER, V9, DOI 10.1186/1471-2407-9-79
   Starbuck Kristen, 2018, Oncotarget, V9, P23289, DOI 10.18632/oncotarget.25289
   Stavenhagen K, 2013, J MASS SPECTROM, V48, P627, DOI [10.1002/jms.3210, 10.1002/jms.3189]
   Stolfa G, 2016, SCI REP-UK, V6, DOI 10.1038/srep30392
   Suzuki Y, 2012, INT J ONCOL, V40, P1831, DOI 10.3892/ijo.2012.1411
   Tamura F, 2016, GASTRIC CANCER, V19, P85, DOI 10.1007/s10120-014-0454-z
   THOR A, 1986, CANCER RES, V46, P3118
   Tian E, 2009, GLYCOCONJUGATE J, V26, P325, DOI 10.1007/s10719-008-9162-4
   Tsai CH, 2016, CANCER RES, V76, P5756, DOI 10.1158/0008-5472.CAN-16-0641
   Tsuboi S, 2011, EMBO J, V30, P3173, DOI 10.1038/emboj.2011.215
   Tzeng SF, 2018, FASEB J, V32, P6869, DOI 10.1096/fj.201800687
   Umana P, 1997, BIOTECHNOL BIOENG, V55, P890, DOI 10.1002/(SICI)1097-0290(19970920)55:6<890::AID-BIT7>3.0.CO;2-B
   Van Elssen CHMJ, 2010, HISTOPATHOLOGY, V57, P597, DOI 10.1111/j.1365-2559.2010.03667.x
   Vazquez-Martin C, 2004, ONCOLOGY-BASEL, V67, P159, DOI 10.1159/000081003
   Wang LZ, 2005, BIOCHEM BIOPH RES CO, V331, P958, DOI 10.1016/j.bbrc.2005.04.022
   Wu YM, 2013, CANCER RES, V73, P5580, DOI 10.1158/0008-5472.CAN-13-0869
   Xia LJ, 2004, J CELL BIOL, V164, P451, DOI 10.1083/jcb.200311112
   Xu F, 2015, INT J CLIN EXP PATHO, V8, P11549
   Ye J, 2017, ONCOGENE, V36, P6391, DOI 10.1038/onc.2017.241
   Zeng JW, 2015, J BIOL CHEM, V290, P19018, DOI 10.1074/jbc.M115.654244
   Zhang CY, 2018, J CANCER, V9, P2666, DOI 10.7150/jca.25252
NR 126
TC 19
Z9 19
U1 4
U2 14
PU MDPI
PI BASEL
PA ST ALBAN-ANLAGE 66, CH-4052 BASEL, SWITZERLAND
EI 2073-4409
J9 CELLS-BASEL
JI Cells
PD FEB
PY 2020
VL 9
IS 2
AR 446
DI 10.3390/cells9020446
PG 24
WC Cell Biology
WE Science Citation Index Expanded (SCI-EXPANDED)
SC Cell Biology
GA KX5UC
UT WOS:000521944900187
PM 32075174
OA Green Published, gold
DA 2022-04-10
ER

PT J
AU Friedbichler, K
   Hoelbl, A
   Li, GQ
   Bunting, KD
   Sexl, V
   Gouilleux, F
   Moriggl, R
AF Friedbichler, Katrin
   Hoelbl, Andrea
   Li, Geqiang
   Bunting, Kevin D.
   Sexl, Veronika
   Gouilleux, Fabrice
   Moriggl, Richard
TI Serine phosphorylation of the Stat5a C-terminus is a driving force for
   transformation
SO FRONTIERS IN BIOSCIENCE-LANDMARK
LA English
DT Article
DE Stat5a; Stat5b; Serine Phosphorylation; Transformation; Serine-Threonine
   Kinase; Review
ID ACTIVATED PROTEIN-KINASE; ACUTE MYELOID-LEUKEMIA; ALPHA-HELICAL REGION;
   SIGNAL TRANSDUCER; DNA-BINDING; TRANSACTIVATION DOMAIN; TRANSCRIPTIONAL
   ACTIVATION; CONSTITUTIVE ACTIVATION; CYTOPLASMIC LOCALIZATION; SER727
   PHOSPHORYLATION
AB Persistent tyrosine phosphorylation of Stat3 and Stat5 is associated with oncogenic activity. Phosphorylation of the conserved tyrosine residue (pTyr) was long believed to be the only essential prerequisite to promote activation and nuclear translocation of Stat proteins. It has become evident, however, that post-translational protein modifications like serine phosphorylation, acetylation, glycosylation as well as protein splicing and processing constitute further regulatory mechanism to modulate Stat transcriptional regulation and to provide an additional layer of specificity to Jak-Stat signal transduction. Significantly, most vertebrate Stat proteins contain one conserved serine phosphorylation site within their transactivation domains. This phosphorylation motif is located within a P(M)SP sequence. Stat transcription factor activity is negatively influenced by mutation of the serine to alanine. Moreover, it was shown for both Stat3 and Stat5 that their capacity to transform cells was diminished. This review addresses recent advances in understanding the regulation and the biochemical and biological consequences of Stat serine phosphorylation. In particular, we discuss their role in persistently activated Stat proteins for cancer research.
C1 [Friedbichler, Katrin; Moriggl, Richard] Ludwig Boltzmann Inst Canc Res, A-1090 Vienna, Austria.
   [Hoelbl, Andrea; Sexl, Veronika] Med Univ Vienna, Inst Pharmacol, Vienna, Austria.
   [Li, Geqiang] Boston Childrens Hosp, Div Hem Onc, Dept Pediat, Boston, MA USA.
   [Bunting, Kevin D.] Emory Univ, Div Hem Onc BMT, Dept Pediat, Atlanta, GA 30322 USA.
   [Bunting, Kevin D.] Emory Univ, Aflac Canc Ctr, Atlanta, GA 30322 USA.
   [Bunting, Kevin D.] Emory Univ, Blood Disorders Serv, Atlanta, GA 30322 USA.
   [Gouilleux, Fabrice] Univ Tours, UFR Med, UMR 6239, CNRS, Tours, France.
RP Moriggl, R (corresponding author), Ludwig Boltzmann Inst Canc Res, Waehringer Str 13A, A-1090 Vienna, Austria.
EM richard.moriggl@lbicr.lbg.ac.at
RI Moriggl, Richard/H-8118-2019; Sexl, Veronika/B-8657-2016
OI Moriggl, Richard/0000-0003-0918-9463; Sexl,
   Veronika/0000-0001-9363-0412; Gouilleux, Fabrice/0000-0001-6047-1718;
   Hoelbl-Kovacic, Andrea/0000-0001-6219-8794
FU Austrian Basic Research Funds (FWF)Austrian Science Fund (FWF)
   [Sonderforschungsbereich (SFB) F28]; Association de la Recherche contre
   le Cancer (ARC)Fondation ARC pour la Recherche sur le Cancer; NIHUnited
   States Department of Health & Human ServicesNational Institutes of
   Health (NIH) - USA [R01DK059380];  [LS07-037]; NATIONAL INSTITUTE OF
   DIABETES AND DIGESTIVE AND KIDNEY DISEASESUnited States Department of
   Health & Human ServicesNational Institutes of Health (NIH) - USANIH
   National Institute of Diabetes & Digestive & Kidney Diseases (NIDDK)
   [R01DK059380] Funding Source: NIH RePORTER; Austrian Science Fund
   (FWF)Austrian Science Fund (FWF) [F 2807] Funding Source: researchfish
FX This article was supported by grant Sonderforschungsbereich (SFB) F28
   from the Austrian Basic Research Funds (FWF) to the authors K. F., A.
   H., V. S., R. M., Wiener Wissenschafts-, Forschungs- und
   Technologiefonds (WWTF) grant LS07-037 to V. S., Association de la
   Recherche contre le Cancer (ARC) grant to F. G., and grant NIH
   R01DK059380 to KDB.
CR Aoki N, 2002, MOL ENDOCRINOL, V16, P58, DOI 10.1210/me.16.1.58
   Aziz MH, 2007, MOL CARCINOGEN, V46, P646, DOI 10.1002/mc.20356
   Aziz MH, 2007, CANCER RES, V67, P8828, DOI 10.1158/0008-5472.CAN-07-1604
   Baumgartner C, 2009, AM J PATHOL, V175, P2416, DOI 10.2353/ajpath.2009.080953
   Beadling C, 1996, EMBO J, V15, P1902, DOI 10.1002/j.1460-2075.1996.tb00541.x
   Beuvink I, 2000, J BIOL CHEM, V275, P10247, DOI 10.1074/jbc.275.14.10247
   Boucheron C, 1998, J BIOL CHEM, V273, P33936, DOI 10.1074/jbc.273.51.33936
   Buettner R, 2002, CLIN CANCER RES, V8, P945
   Bunting KD, 2007, BLOOD, V110, P2775, DOI 10.1182/blood-2007-05-090969
   Bunting KD, 2007, FRONT BIOSCI-LANDMRK, V12, P2807, DOI 10.2741/2274
   Chen Y, 2003, J BIOL CHEM, V278, P16520, DOI 10.1074/jbc.M210572200
   Chung JK, 1997, MOL CELL BIOL, V17, P6508, DOI 10.1128/MCB.17.11.6508
   Clark DE, 2005, J BIOL CHEM, V280, P24175, DOI 10.1074/jbc.M414044200
   Creamer BA, 2010, MOL CELL BIOL, V30, P2957, DOI 10.1128/MCB.00851-09
   Cui YZ, 2001, GENOMICS, V78, P129, DOI 10.1006/geno.2001.6661
   Darnell JE, 2002, NAT REV CANCER, V2, P740, DOI 10.1038/nrc906
   Decker T, 2000, ONCOGENE, V19, P2628, DOI 10.1038/sj.onc.1203481
   DECKER T, 2003, SIGNAL TRANSDUCERS A
   Durant L, 2010, IMMUNITY, V32, P605, DOI 10.1016/j.immuni.2010.05.003
   Ehret GB, 2001, J BIOL CHEM, V276, P6675, DOI 10.1074/jbc.M001748200
   FERBEYRE G, 2010, BIOCH BIOPHYS ACTA
   Frank DA, 1997, J CLIN INVEST, V100, P3140, DOI 10.1172/JCI119869
   FRIEDBICHLER K, 2009, JAK STAT PATHWAY DIS
   Friedbichler K, 2010, BLOOD, V116, P1548, DOI 10.1182/blood-2009-12-258913
   Garcia R, 1997, CELL GROWTH DIFFER, V8, P1267
   Gebert CA, 1997, MOL ENDOCRINOL, V11, P400, DOI 10.1210/me.11.4.400
   Gewinner C, 2004, J BIOL CHEM, V279, P3563, DOI 10.1074/jbc.M306449200
   Gough DJ, 2009, SCIENCE, V324, P1713, DOI 10.1126/science.1171721
   Grebien F, 2008, BLOOD, V111, P4511, DOI 10.1182/blood-2007-07-102848
   Gururaj AE, 2005, BREAST CANCER RES, V7, P5, DOI 10.1186/bcr961
   Harir N, 2008, BLOOD, V112, P2463, DOI 10.1182/blood-2007-09-115477
   Harir N, 2007, BLOOD, V109, P1678, DOI 10.1182/blood-2006-01-029918
   Hennighausen L, 2008, GENE DEV, V22, P711, DOI 10.1101/gad.1643908
   Huang M, 2002, NAT CELL BIOL, V4, P774, DOI 10.1038/ncb855
   Imada K, 1998, J EXP MED, V188, P2067, DOI 10.1084/jem.188.11.2067
   JACKSON SP, 1988, CELL, V55, P125, DOI 10.1016/0092-8674(88)90015-3
   JOHNSON KJ, 2010, AM J PATHOL
   Kamemura K, 2002, J BIOL CHEM, V277, P19229, DOI 10.1074/jbc.M201729200
   KAZANSKY AV, 1995, MOL ENDOCRINOL, V9, P1598, DOI 10.1210/me.9.11.1598
   Kim JH, 2009, J BIOL CHEM, V284, P35425, DOI 10.1074/jbc.M109.051516
   Kim S, 2003, GENE DEV, V17, P1979, DOI 10.1101/gad.1119303
   Kirken RA, 1997, J BIOL CHEM, V272, P14098, DOI 10.1074/jbc.272.22.14098
   Kornfeld JW, 2008, FRONT BIOSCI-LANDMRK, V13, P6237, DOI 10.2741/3151
   Kovarik P, 1999, P NATL ACAD SCI USA, V96, P13956, DOI 10.1073/pnas.96.24.13956
   Kovarik P, 2001, EMBO J, V20, P91, DOI 10.1093/emboj/20.1.91
   Kreegipuu A, 1999, NUCLEIC ACIDS RES, V27, P237, DOI 10.1093/nar/27.1.237
   Letimier FA, 2007, EMBO J, V26, P1292, DOI 10.1038/sj.emboj.7601586
   Levy DE, 2002, NAT REV MOL CELL BIO, V3, P651, DOI 10.1038/nrm909
   Li G, 2010, LEUKEMIA, V24, P1397, DOI 10.1038/leu.2010.131
   Li GQ, 2010, BLOOD, V115, P1416, DOI 10.1182/blood-2009-07-234963
   Li GQ, 2010, PLOS ONE, V5, DOI 10.1371/journal.pone.0009152
   Lilly M, 1997, CANCER RES, V57, P5348
   Lim CP, 2001, J BIOL CHEM, V276, P21004, DOI 10.1074/jbc.M007592200
   Litterst CM, 2003, J BIOL CHEM, V278, P45340, DOI 10.1074/jbc.M303644200
   Litterst CM, 2002, J BIOL CHEM, V277, P36052, DOI 10.1074/jbc.M203556200
   Litterst CM, 2001, J BIOL CHEM, V276, P45713, DOI 10.1074/jbc.M108132200
   Liu G, 2007, EXP HEMATOL, V35, P1684, DOI 10.1016/j.exphem.2007.08.026
   Liu H, 2002, MOL CELL BIOL, V22, P6471, DOI 10.1128/MCB.22.18.6471-6479.2002
   Magne S, 2003, MOL CELL BIOL, V23, P8934, DOI 10.1128/MCB.23.24.8934-8945.2003
   Maiti NR, 2005, J INTERF CYTOK RES, V25, P553, DOI 10.1089/jir.2005.25.553
   McCubrey JA, 2000, LEUKEMIA, V14, P9, DOI 10.1038/sj.leu.2401657
   Mikkers H, 2004, MOL CELL BIOL, V24, P6104, DOI 10.1128/MCB.24.13.6104-6115.2004
   Moriggl R, 2005, CANCER CELL, V7, P87, DOI 10.1016/j.ccr.2004.12.010
   Moriggl R, 1997, MOL CELL BIOL, V17, P3663, DOI 10.1128/MCB.17.7.3663
   Moriggl R, 1996, MOL CELL BIOL, V16, P5691
   Morinobu A, 2002, P NATL ACAD SCI USA, V99, P12281, DOI 10.1073/pnas.182618999
   Nakajima H, 2001, EMBO J, V20, P6836, DOI 10.1093/emboj/20.23.6836
   Ng J, 1997, J BIOL CHEM, V272, P24542, DOI 10.1074/jbc.272.39.24542
   Nyga R, 2005, BIOCHEM J, V390, P359, DOI 10.1042/BJ20041523
   O'Shea JJ, 2008, IMMUNITY, V28, P477, DOI 10.1016/j.immuni.2008.03.002
   Onishi M, 1998, MOL CELL BIOL, V18, P3871, DOI 10.1128/MCB.18.7.3871
   Park SH, 2001, MOL ENDOCRINOL, V15, P2157, DOI 10.1210/me.15.12.2157
   Pattenden SG, 2002, EMBO J, V21, P1978, DOI 10.1093/emboj/21.8.1978
   Paukku K, 2003, MOL ENDOCRINOL, V17, P1805, DOI 10.1210/me.2002-0256
   Peng B, 2002, MOL ENDOCRINOL, V16, P2019, DOI 10.1210/me.2002-0108
   Peng C, 2007, J BIOCHEM, V141, P353, DOI 10.1093/jb/mvm040
   Pesu M, 2000, BLOOD, V95, P494, DOI 10.1182/blood.V95.2.494
   Pesu M, 2002, J BIOL CHEM, V277, P38254, DOI 10.1074/jbc.M201427200
   Pfitzner E, 1998, MOL ENDOCRINOL, V12, P1582, DOI 10.1210/me.12.10.1582
   Pilz A, 2009, J IMMUNOL, V183, P2286, DOI 10.4049/jimmunol.0901383
   Pircher TJ, 1999, MOL ENDOCRINOL, V13, P555, DOI 10.1210/mend.13.4.0263
   Plaza-Menacho I, 2007, J BIOL CHEM, V282, P6415, DOI 10.1074/jbc.M608952200
   Qin HR, 2008, CANCER RES, V68, P7736, DOI 10.1158/0008-5472.CAN-08-1125
   Ramsauer K, 2007, P NATL ACAD SCI USA, V104, P2849, DOI 10.1073/pnas.0610944104
   Rigacci S, 2008, BIOCHEMISTRY-US, V47, P1482, DOI 10.1021/bi701131e
   Schindler C, 2007, J BIOL CHEM, V282, P20059, DOI 10.1074/jbc.R700016200
   Schuringa JJ, 2000, BLOOD, V95, P3765, DOI 10.1182/blood.V95.12.3765
   Soldaini E, 2000, MOL CELL BIOL, V20, P389, DOI 10.1128/MCB.20.1.389-401.2000
   Stephens JM, 1998, J BIOL CHEM, V273, P31408, DOI 10.1074/jbc.273.47.31408
   Stocklin E, 1996, NATURE, V383, P726, DOI 10.1038/383726a0
   Su L, 1999, J BIOL CHEM, V274, P31770, DOI 10.1074/jbc.274.45.31770
   Sun W, 2006, FEBS LETT, V580, P5880, DOI 10.1016/j.febslet.2006.09.054
   Tanaka T, 2005, IMMUNITY, V22, P729, DOI 10.1016/j.immuni.2005.04.008
   Ubersax JA, 2007, NAT REV MOL CELL BIO, V8, P530, DOI 10.1038/nrm2203
   Uddin S, 2000, J BIOL CHEM, V275, P27634
   Uddin S, 1999, J BIOL CHEM, V274, P30127, DOI 10.1074/jbc.274.42.30127
   Udy GB, 1997, P NATL ACAD SCI USA, V94, P7239, DOI 10.1073/pnas.94.14.7239
   Varinou L, 2003, IMMUNITY, V19, P793, DOI 10.1016/S1074-7613(03)00322-4
   Verdier F, 1998, MOL CELL BIOL, V18, P5852, DOI 10.1128/MCB.18.10.5852
   Visconti R, 2000, BLOOD, V96, P1844, DOI 10.1182/blood.V96.5.1844.h8001844_1844_1852
   Wang DM, 1996, MOL CELL BIOL, V16, P6141
   Wang DM, 2000, EMBO J, V19, P392, DOI 10.1093/emboj/19.3.392
   Wang RA, 2003, J CELL BIOL, V161, P583, DOI 10.1083/JCB.200212066
   Wang Z, 2008, P NATL ACAD SCI USA, V105, P13793, DOI 10.1073/pnas.0806216105
   Wartmann M, 1996, J BIOL CHEM, V271, P31863, DOI 10.1074/jbc.271.50.31863
   Weaver AM, 2007, BIOCHEM BIOPH RES CO, V362, P1026, DOI 10.1016/j.bbrc.2007.08.087
   Wegrzyn J, 2009, SCIENCE, V323, P793, DOI 10.1126/science.1164551
   Wei L, 2010, IMMUNITY, V32, P840, DOI 10.1016/j.immuni.2010.06.003
   WEN ZL, 1995, CELL, V82, P241, DOI 10.1016/0092-8674(95)90311-9
   Wen ZL, 1997, NUCLEIC ACIDS RES, V25, P2062, DOI 10.1093/nar/25.11.2062
   Wick KR, 2000, MOL IMMUNOL, V37, P641, DOI 10.1016/S0161-5890(00)00088-2
   Xu D, 2008, FRONT BIOSCI-LANDMRK, V13, P4925, DOI 10.2741/3051
   Xue HH, 2002, INT IMMUNOL, V14, P1263, DOI 10.1093/intimm/dxf101
   Yamashita H, 1998, J BIOL CHEM, V273, P30218, DOI 10.1074/jbc.273.46.30218
   Yang J, 2005, CANCER RES, V65, P939
   Yu H, 2004, NAT REV CANCER, V4, P97, DOI 10.1038/nrc1275
   Yu H, 2007, NAT REV IMMUNOL, V7, P41, DOI 10.1038/nri1995
   Zakharova N, 2003, J BIOL CHEM, V278, P43067, DOI 10.1074/jbc.M308166200
   Zauberman A, 1999, ONCOGENE, V18, P3886, DOI 10.1038/sj.onc.1202738
   ZHANG XK, 1995, SCIENCE, V267, P1990, DOI 10.1126/science.7701321
   Zhang Y, 2007, BLOOD, V110, P116, DOI 10.1182/blood-2006-11-060707
   Zhu MH, 1999, CELL, V96, P121, DOI 10.1016/S0092-8674(00)80965-4
NR 122
TC 5
Z9 5
U1 1
U2 3
PU FRONTIERS IN BIOSCIENCE INC
PI IRVINE
PA 16471 SCIENTIFIC WAY, IRVINE, CA 92618 USA
SN 1093-9946
EI 1093-4715
J9 FRONT BIOSCI-LANDMRK
JI Front. Biosci.
PD JUN 1
PY 2011
VL 16
BP 3043
EP +
DI 10.2741/3897
PG 14
WC Biochemistry & Molecular Biology; Cell Biology
WE Science Citation Index Expanded (SCI-EXPANDED)
SC Biochemistry & Molecular Biology; Cell Biology
GA 757OM
UT WOS:000290097600012
PM 21622220
OA Green Submitted
DA 2022-04-10
ER

PT J
AU Sarto, C
   Valsecchi, C
   Magni, F
   Tremolada, L
   Arizzi, C
   Cordani, N
   Casellato, S
   Doro, G
   Favini, P
   Perego, RA
   Raimondo, F
   Ferrero, S
   Mocarelli, P
   Galli-Kienle, M
AF Sarto, C
   Valsecchi, C
   Magni, F
   Tremolada, L
   Arizzi, C
   Cordani, N
   Casellato, S
   Doro, G
   Favini, P
   Perego, RA
   Raimondo, F
   Ferrero, S
   Mocarelli, P
   Galli-Kienle, M
TI Expression of heat shock protein 27 in human renal cell carcinoma
SO PROTEOMICS
LA English
DT Article; Proceedings Paper
CT 3rd Annual Congress of the Swiss-Proteomics-Society
CY DEC 02-04, 2003
CL Basel, SWITZERLAND
SP Swiss Proteom Soc
DE heat shock protein 27; mass spectrometry; phosphorylation; renal cell
   carcinoma; two-dimensional gel electrophoresis
ID HEAT-SHOCK-PROTEIN; POLYACRYLAMIDE-GELS; HSP27; CANCER; APOPTOSIS;
   PROSTATE; KIDNEY
AB Heat shock protein 27 (HSP27, Swiss-Prot accession number P04792) is a component of the large and heterogeneous group of chaperone proteins, and its main functions are inhibition of apoptosis and prevention of aggregation of actin intermediate filament. Modified expression of HSP27 has been described in several cancers including testis, breast, and ovaric cancer. In the present work, 18 renal cell carcinoma (RCC) tissues and homologous normal kidney tissues have been investigated for HSP27 expression by combination of two-dimensional polyacrylamide gel electrophoresis (2-D PAGE) separation and Western blotting immunodetection. The results showed significant differences either in expression and in HSP27 isoform numbers in RCC compared to normal kidney. The average number of isoforms was 21 in RCC and 15 in normal tissues with 4.5-5.9 p/range and 18-29 kDa M, range. The overexpression was also observed by immunohistochemistry on tissue sections. Only two of RCC samples showed less isoforms than homologous normal samples. Two isoforms were not detected using anti-Ser82 phosphorylated HSP27 antibody, neither in normal nor in RCC samples. Five of all the immunodetected isoforms were confirmed by mass spectrometry as HSP27, but no evidence of post-translational modification was pointed out. The numerous isoforms observed in RCC are not consistent with data reported in the literature so far, and they might be due to different post-translational modification such as phosphorylation and S-thiolation. Since activation of HSP27 seems to be involved in tumor proliferation and drug resistance, it would be crucial to correlate the severity of disease with the different isoforms from RCC samples to generate diagnostic and prognostic markers.
C1 Univ Milano Bicocca, Dept Lab Med, Desio Hosp, I-20033 Desio, MI, Italy.
   Univ Milano Bicocca, Dept Expt & Environm Med, Monza, Italy.
   Univ Milan, S Paolo Hosp, Dept Med Surg & Dent, Milan, Italy.
RP Sarto, C (corresponding author), Univ Milano Bicocca, Dept Lab Med, Desio Hosp, Via Mazzini 1, I-20033 Desio, MI, Italy.
EM sarto@uds.unimib.it
RI Cordani, Nicoletta/ABG-8636-2020; Cordani, Nicoletta/AAC-1978-2022;
   Raimondo, Francesca/A-2950-2014; Magni, Fulvio/A-7340-2014
OI Cordani, Nicoletta/0000-0002-3227-8280; Magni,
   Fulvio/0000-0002-8663-0374
CR Beck FX, 2000, AM J PHYSIOL-RENAL, V279, pF203, DOI 10.1152/ajprenal.2000.279.2.F203
   Bostwick DG, 2000, MOL UROL, V4, P101
   BRADFORD MM, 1976, ANAL BIOCHEM, V72, P248, DOI 10.1016/0003-2697(76)90527-3
   Charette SJ, 2000, MOL CELL BIOL, V20, P7602, DOI 10.1128/MCB.20.20.7602-7612.2000
   CIOCCA DR, 1993, JNCI-J NATL CANCER I, V85, P1558, DOI 10.1093/jnci/85.19.1558
   Devaja O, 1997, EUR J GYNAECOL ONCOL, V18, P16
   Ehrnsperger M, 1999, J BIOL CHEM, V274, P14867, DOI 10.1074/jbc.274.21.14867
   Farrow GM, 1994, AFI ATLAS TUMOR PATH, P1
   FULLER KJ, 1994, EUR J CANCER, V30A, P1884, DOI 10.1016/0959-8049(94)00362-9
   HOCHSTRASSER DF, 1988, ANAL BIOCHEM, V173, P412, DOI 10.1016/0003-2697(88)90208-4
   Lichtenfels R, 2002, PROTEOMICS, V2, P561, DOI 10.1002/1615-9861(200205)2:5<561::AID-PROT561>3.0.CO;2-K
   MIRON T, 1991, J CELL BIOL, V114, P255, DOI 10.1083/jcb.114.2.255
   Mostofi FK, 1998, HIST TYPING KIDNEY T, P3
   Rane MJ, 2003, J BIOL CHEM, V278, P27828, DOI 10.1074/jbc.M303417200
   Sanchez JC, 1999, METH MOL B, V112, P221
   Sarto C, 1997, ELECTROPHORESIS, V18, P599, DOI 10.1002/elps.1150180343
   Sarto C, 2002, PROTEOMICS, V2, P1627, DOI 10.1002/1615-9861(200211)2:11<1627::AID-PROT1627>3.0.CO;2-K
   Scheler C, 1999, ELECTROPHORESIS, V20, P3623, DOI 10.1002/(SICI)1522-2683(19991201)20:18<3623::AID-ELPS3623>3.0.CO;2-R
   Schober A, 1998, KIDNEY INT, V54, pS174, DOI 10.1046/j.1523-1755.1998.06738.x
   Shevchenko A, 1996, ANAL CHEM, V68, P850, DOI 10.1021/ac950914h
   STORM FK, 1993, UROLOGY, V42, P379, DOI 10.1016/0090-4295(93)90361-D
   Sugiyama Y, 2000, J BIOL CHEM, V275, P1095, DOI 10.1074/jbc.275.2.1095
   Takashi M, 1998, UROL RES, V26, P395, DOI 10.1007/s002400050075
   VargasRoig LM, 1997, CANCER DETECT PREV, V21, P441
   Wang MZ, 2001, ANAL CHEM, V73, P625, DOI 10.1021/ac0009090
   Zhang RL, 2003, GLIA, V42, P194, DOI 10.1002/glia.10222
NR 26
TC 58
Z9 64
U1 0
U2 3
PU WILEY
PI HOBOKEN
PA 111 RIVER ST, HOBOKEN 07030-5774, NJ USA
SN 1615-9853
EI 1615-9861
J9 PROTEOMICS
JI Proteomics
PD AUG
PY 2004
VL 4
IS 8
BP 2252
EP 2260
DI 10.1002/pmic.200300797
PG 9
WC Biochemical Research Methods; Biochemistry & Molecular Biology
WE Science Citation Index Expanded (SCI-EXPANDED); Conference Proceedings Citation Index - Science (CPCI-S)
SC Biochemistry & Molecular Biology
GA 844DK
UT WOS:000223137300008
PM 15274119
DA 2022-04-10
ER

PT J
AU Beaumatin, F
   El Dhaybi, M
   Bobo, C
   Verdier, M
   Priault, M
AF Beaumatin, Florian
   El Dhaybi, Mohamad
   Bobo, Claude
   Verdier, Mireille
   Priault, Muriel
TI Bcl-x(L) deamidation and cancer: Charting the fame trajectories of
   legitimate child and hidden siblings
SO BIOCHIMICA ET BIOPHYSICA ACTA-MOLECULAR CELL RESEARCH
LA English
DT Review
DE Bcl-x(L); Post-translational modification; Deamidation; Apoptosis;
   Autophagy; Aging
ID BCL-XL PHOSPHORYLATION; APOPTOTIC CELL-DEATH; DNA-DAMAGE; NECROTIZING
   FACTOR-1; L PROTEIN; RIG-I; INHIBITOR; RHO; KINASE; FAMILY
AB Bcl-2 family proteins control programmed cell death through a complex network of interactions within and outside of this family, that are modulated by post-translational modification (PTM). Bcl-x(L), an anti-apoptotic member of this family, is overexpressed in a number of cancers, plays an important role in tumorigenesis and is correlated with drug resistance. Bcl-x(L) is susceptible to a number of different PTMs. Here, we focus on deamidation. We will first provide an overview of protein deamidation. We will then review how the apoptotic and autophagic functions of Bcl-x(L) are modified by this PTM, and how this impacts on its oncogenic properties. Possible therapeutic outcomes will also be discussed. Finally, we will highlight how the specific case of Bcl-x(L), deamidation provides groundings to revisit some concepts related to protein deamidation in general.
C1 [Beaumatin, Florian; El Dhaybi, Mohamad; Bobo, Claude; Priault, Muriel] CNRS, Inst Biochim & Genet Cellulaires, UMR5095, 1 Rue Camille St Saens, F-33077 Bordeaux, France.
   [Beaumatin, Florian; El Dhaybi, Mohamad; Bobo, Claude; Priault, Muriel] Univ Bordeaux, Inst Biochim & Genet Cellulaires, UMR5095, Rue Camille St Saens, F-33077 Bordeaux, France.
   [El Dhaybi, Mohamad; Verdier, Mireille] Univ Limoges, Homeostasie Cellulaire & Pathol, EA 3842, 2 Rue Docteur Marcland, F-87025 Limoges, France.
RP Priault, M (corresponding author), CNRS, Inst Biochim & Genet Cellulaires, UMR5095, 1 Rue Camille St Saens, F-33077 Bordeaux, France.
EM muriel.priault@ibgc.cnrs.fr
OI EL Dhaybi, Mohamad/0000-0003-3677-7711; VERDIER,
   Mireille/0000-0002-8162-4856; Priault, Muriel/0000-0001-8193-0389
FU CNRS, Universite de Bordeaux [UMR 5095]; Ligue Regionale Contre le
   CancerLigue nationale contre le cancer; Ministere de la
   RechercheMinistry of Research, France; Lebanese Association for
   Scientific Research
FX This work was supported by the CNRS, Universite de Bordeaux (to UMR
   5095). M.P. is supported by Ligue Regionale Contre le Cancer. F.B.
   received a PhD grant from the Ministere de la Recherche. MED is
   supported by the Lebanese Association for Scientific Research.
CR Ahn JS, 2016, ONCOGENE, V35, P2235, DOI 10.1038/onc.2015.285
   Amundson SA, 2000, CANCER RES, V60, P6101
   Antony R, 2010, J BIOL CHEM, V285, P18301, DOI 10.1074/jbc.M109.095232
   Aritomi M, 1997, J BIOL CHEM, V272, P27886, DOI 10.1074/jbc.272.44.27886
   Asakura T., 1992, INT J ONCOL
   Baruah PS, 2016, PLOS ONE, V11, DOI 10.1371/journal.pone.0159091
   Basanez G, 2001, J BIOL CHEM, V276, P31083, DOI 10.1074/jbc.M103879200
   Basu A, 2003, FEBS LETT, V538, P41, DOI 10.1016/S0014-5793(03)00131-5
   Beaumatin F, 2016, ONCOTARGET, V7, P17129, DOI 10.18632/oncotarget.7938
   BOISE LH, 1993, CELL, V74, P597, DOI 10.1016/0092-8674(93)90508-N
   Chang CY, 2006, ONCOGENE, V25, P2656, DOI 10.1038/sj.onc.1209294
   Cimmino A, 2008, PLOS ONE, V3, DOI 10.1371/journal.pone.0003258
   Clem RJ, 1998, P NATL ACAD SCI USA, V95, P554, DOI 10.1073/pnas.95.2.554
   Czabotar PE, 2014, NAT REV MOL CELL BIO, V15, P49, DOI 10.1038/nrm3722
   de la Mora-de la Mora I, 2015, PLOS ONE, V10, DOI 10.1371/journal.pone.0123379
   Del Re DP, 2014, MOL CELL, V54, P639, DOI 10.1016/j.molcel.2014.04.007
   Desrosiers Richard R, 2011, Curr Aging Sci, V4, P8
   Deverman BE, 2002, CELL, V111, P51, DOI 10.1016/S0092-8674(02)00972-8
   Deverman BE, 2003, CELL, V115, P503, DOI 10.1016/S0092-8674(03)00892-4
   Dho SH, 2013, PLOS BIOL, V11, DOI 10.1371/journal.pbio.1001588
   Doye A, 2002, CELL, V111, P553, DOI 10.1016/S0092-8674(02)01132-7
   Eichhorn JM, 2013, CELL DEATH DIS, V4, DOI 10.1038/cddis.2013.360
   Elkholi R, 2014, CANCER METAB, V2, DOI 10.1186/2049-3002-2-16
   Fares M, 2015, BIOCHEM BIOPH RES CO, V463, P268, DOI 10.1016/j.bbrc.2015.05.043
   Flatau G, 1997, NATURE, V387, P729, DOI 10.1038/42743
   Fujita N, 1998, ONCOGENE, V17, P1295, DOI 10.1038/sj.onc.1202065
   Garcin D, 2016, CELL HOST MICROBE, V20, P698, DOI 10.1016/j.chom.2016.11.011
   GEIGER T, 1987, J BIOL CHEM, V262, P785
   GERSHON H, 1973, P NATL ACAD SCI USA, V70, P909, DOI 10.1073/pnas.70.3.909
   GREENBERG CS, 1991, FASEB J, V5, P3071, DOI 10.1096/fasebj.5.15.1683845
   He SP, 2015, MOL CELL, V58, P134, DOI 10.1016/j.molcel.2015.01.036
   Hertz NT, 2013, CELL, V154, P737, DOI 10.1016/j.cell.2013.07.030
   Huebscher KJ, 1999, GENE, V240, P333, DOI 10.1016/S0378-1119(99)00443-6
   JOHNSON BA, 1987, J BIOL CHEM, V262, P12283
   Jonas EA, 2004, P NATL ACAD SCI USA, V101, P13590, DOI 10.1073/pnas.0401372101
   Kajihara R, 2014, J IMMUNOL, V192, P5720, DOI 10.4049/jimmunol.1302643
   Karmazyn M, 2013, J MOL CELL CARDIOL, V61, P77, DOI 10.1016/j.yjmcc.2013.02.006
   Kharbanda S, 2000, J BIOL CHEM, V275, P322, DOI 10.1074/jbc.275.1.322
   Kim E, 1997, P NATL ACAD SCI USA, V94, P6132, DOI 10.1073/pnas.94.12.6132
   Kvansakul M, 2015, APOPTOSIS, V20, P136, DOI 10.1007/s10495-014-1051-7
   Landraud L, 2004, INT J MED MICROBIOL, V293, P513, DOI 10.1078/1438-4221-00295
   Lerm M, 1999, INFECT IMMUN, V67, P496, DOI 10.1128/IAI.67.2.496-503.1999
   Lessene G, 2013, NAT CHEM BIOL, V9, P390, DOI [10.1038/NCHEMBIO.1246, 10.1038/nchembio.1246]
   Lindsay J, 2011, BBA-MOL CELL RES, V1813, P532, DOI 10.1016/j.bbamcr.2010.10.017
   Macdonald James I, 2012, Genes Cancer, V3, P619, DOI 10.1177/1947601912473305
   Mamula MJ, 1999, J BIOL CHEM, V274, P22321, DOI 10.1074/jbc.274.32.22321
   Massacesi C, 2016, ONCOtarget THER, V9, P203, DOI 10.2147/OTT.S89967
   MCKERROW JH, 1974, SCIENCE, V183, P85, DOI 10.1126/science.183.4120.85
   Muchmore SW, 1996, NATURE, V381, P335, DOI 10.1038/381335a0
   Nakamura M, 2016, JCI INSIGHT, V1, DOI 10.1172/jci.insight.86217
   Oltersdorf T, 2005, NATURE, V435, P677, DOI 10.1038/nature03579
   Park K, 2009, ONCOL REP, V21, P689, DOI 10.3892/or_00000272
   Petros AM, 2004, BBA-MOL CELL RES, V1644, P83, DOI 10.1016/j.bbamcr.2003.08.012
   Priault M, 2010, PLOS ONE, V5, DOI 10.1371/journal.pone.0008755
   Qin ZX, 2014, INVEST OPHTH VIS SCI, V55, P1572, DOI 10.1167/iovs.13-13668
   Reissner KJ, 2003, CELL MOL LIFE SCI, V60, P1281, DOI 10.1007/s00018-003-2287-5
   Ren HG, 2011, J BIOL CHEM, V286, P35308, DOI 10.1074/jbc.M110.207134
   Robinson N. E., 2004, MOL CLOCKS DEAMIDATI
   Robinson NE, 2002, P NATL ACAD SCI USA, V99, P5283, DOI 10.1073/pnas.082102799
   Robinson NE, 2001, P NATL ACAD SCI USA, V98, P944, DOI 10.1073/pnas.98.3.944
   Rudin CM, 2012, CLIN CANCER RES, V18, P3163, DOI 10.1158/1078-0432.CCR-11-3090
   Sanada T, 2012, NATURE, V483, P623, DOI 10.1038/nature10894
   Schmidt G, 1998, J BIOL CHEM, V273, P13669, DOI 10.1074/jbc.273.22.13669
   Schmidt G, 1997, NATURE, V387, P725, DOI 10.1038/42735
   Schmitt E, 2007, ONCOGENE, V26, P5851, DOI 10.1038/sj.onc.1210396
   Schousboe A, 2014, ADV NEUROBIOL, V11, P13, DOI 10.1007/978-3-319-08894-5_2
   Seng NS, 2016, CELL DEATH DISCOV, V2, DOI 10.1038/cddiscovery.2016.1
   Song XX, 2013, PLOS ONE, V8, DOI 10.1371/journal.pone.0073654
   Souers AJ, 2013, NAT MED, V19, P202, DOI 10.1038/nm.3048
   Sugai M, 1999, INFECT IMMUN, V67, P6550
   Takehara T, 2003, CANCER RES, V63, P3054
   Tsai CF, 2015, NAT COMMUN, V6, DOI 10.1038/ncomms7622
   Ubersax JA, 2007, NAT REV MOL CELL BIO, V8, P530, DOI 10.1038/nrm2203
   Upreti M, 2008, J BIOL CHEM, V283, P35517, DOI 10.1074/jbc.M805019200
   Wagner SA, 2011, MOL CELL PROTEOMICS, V10, DOI 10.1074/mcp.M111.013284
   Wang JF, 2012, CELL CYCLE, V11, P2159, DOI 10.4161/cc.20672
   Wang JF, 2011, CELL SIGNAL, V23, P2030, DOI 10.1016/j.cellsig.2011.07.017
   Wei ZL, 2009, CELL SIGNAL, V21, P161, DOI 10.1016/j.cellsig.2008.10.005
   Wilson WH, 2010, LANCET ONCOL, V11, P1149, DOI 10.1016/S1470-2045(10)70261-8
   WRIGHT HT, 1991, PROTEIN ENG, V4, P283, DOI 10.1093/protein/4.3.283
   Zhao J, 2016, CELL HOST MICROBE, V20, P770, DOI 10.1016/j.chom.2016.10.011
   Zhao J, 2016, J VIROL, V90, P4262, DOI 10.1128/JVI.01980-15
   Zhao R, 2004, CANCER CELL, V5, P37, DOI 10.1016/S1535-6108(03)00333-7
   Zhao R, 2007, PLOS BIOL, V5, P39, DOI 10.1371/journal.pbio.0050001
   Zhao R, 2008, NEW ENGL J MED, V359, P2778, DOI 10.1056/NEJMoa0804953
   Zhong DS, 2008, CANCER RES, V68, P7270, DOI 10.1158/0008-5472.CAN-08-1484
   Zhong DS, 2009, J BIOL CHEM, V284, P23225, DOI 10.1074/jbc.M109.005280
   Zhou WH, 2015, ONCOTARGET, V6, P21557, DOI 10.18632/oncotarget.5317
NR 88
TC 11
Z9 10
U1 0
U2 2
PU ELSEVIER SCIENCE BV
PI AMSTERDAM
PA PO BOX 211, 1000 AE AMSTERDAM, NETHERLANDS
SN 0167-4889
EI 1879-2596
J9 BBA-MOL CELL RES
JI Biochim. Biophys. Acta-Mol. Cell Res.
PD OCT
PY 2017
VL 1864
IS 10
BP 1734
EP 1745
DI 10.1016/j.bbamcr.2017.06.012
PG 12
WC Biochemistry & Molecular Biology; Cell Biology
WE Science Citation Index Expanded (SCI-EXPANDED)
SC Biochemistry & Molecular Biology; Cell Biology
GA FH4YG
UT WOS:000411168100018
PM 28645514
OA Bronze
DA 2022-04-10
ER

PT J
AU Shen, F
   Kirmani, KZ
   Xiao, ZM
   Thirlby, BH
   Hickey, RJ
   Malkas, LH
AF Shen, Fei
   Kirmani, Kashif Z.
   Xiao, Zhimin
   Thirlby, Benjamin H.
   Hickey, Robert J.
   Malkas, Linda H.
TI Nuclear Protein Isoforms: Implications for Cancer Diagnosis and Therapy
SO JOURNAL OF CELLULAR BIOCHEMISTRY
LA English
DT Article
DE NUCLEAR PROTEIN ISOFORMS; PHOSPHORYLATION; METHYLATION; ACETYLATION;
   UBIQUINTINATION; SUMOYLATION
ID HISTONE DEACETYLASE INHIBITOR; ACID INDUCES APOPTOSIS; BREAST-CANCER;
   SUMO-1 MODIFICATION; P53 ACETYLATION; GENE-EXPRESSION; C-MYC; CELLS;
   UBIQUITIN; METHYLATION
AB post-translational modification (PTMs) of nuclear proteins play essential roles in the regulation of gene transcription and signal transduction pathway. Numerous studies have demonstrated a correlation between specific nuclear protein isoforms and cellular malignant process. This communication reviews the impact of major PTM events such as phosphorylation, acetylation, methylation, ubiquitination, and sumoylation on several important nuclear proteins including p53, histones, proliferating cellular nuclear antigen (PCNA), and retinoblastoma protein (Rb) in the process. In addition, the implications of the PTMs as cancer biomarkers and therapeutic target are considered. J. Cell. Biochem. 112: 756-760, 2011. (C) 2010 Wiley-Liss, Inc.
C1 [Shen, Fei; Kirmani, Kashif Z.; Xiao, Zhimin; Thirlby, Benjamin H.; Malkas, Linda H.] Indiana Univ, Sch Med, Dept Pharmacol & Toxicol, Indianapolis, IN 46202 USA.
   [Hickey, Robert J.; Malkas, Linda H.] Indiana Univ, Sch Med, Dept Med, Indianapolis, IN 46202 USA.
   [Hickey, Robert J.; Malkas, Linda H.] Indiana Univ, Sch Med, Simon Canc Ctr, Indianapolis, IN 46202 USA.
   [Malkas, Linda H.] Indiana Univ, Sch Med, Dept Med & Mol Genet, Indianapolis, IN 46202 USA.
RP Malkas, LH (corresponding author), Indiana Univ, Sch Med, Dept Pharmacol & Toxicol, 980 W Walnut St,R3-C222, Indianapolis, IN 46202 USA.
EM lmalkas@iupui.edu
FU NIHUnited States Department of Health & Human ServicesNational
   Institutes of Health (NIH) - USA [R01CA121289]; NATIONAL CANCER
   INSTITUTEUnited States Department of Health & Human ServicesNational
   Institutes of Health (NIH) - USANIH National Cancer Institute (NCI)
   [R01CA121289] Funding Source: NIH RePORTER
FX Grant sponsor: NIH; Grant number: R01CA121289.
CR Aaronson DS, 2002, SCIENCE, V296, P1653, DOI 10.1126/science.1071545
   Ande SR, 2009, EUR J PHARMACOL, V625, P199, DOI 10.1016/j.ejphar.2009.08.042
   Best JL, 2004, P NATL ACAD SCI USA, V101, P17622, DOI 10.1073/pnas.0406374101
   Bienko M, 2005, SCIENCE, V310, P1821, DOI 10.1126/science.1120615
   Catalano MG, 2006, J ENDOCRINOL, V191, P465, DOI 10.1677/joe.1.06970
   Choudhary C, 2009, SCIENCE, V325, P834, DOI 10.1126/science.1175371
   Chow LQM, 2007, J CLIN ONCOL, V25, P884, DOI 10.1200/JCO.2006.06.3602
   Chuikov S, 2004, NATURE, V432, P353, DOI 10.1038/nature03117
   Driscoll JJ, 2010, BLOOD, V115, P2827, DOI 10.1182/blood-2009-03-211045
   Ellis L, 2009, MOL CANCER THER, V8, P1409, DOI 10.1158/1535-7163.MCT-08-0860
   Faivre S, 2007, NAT REV DRUG DISCOV, V6, P734, DOI 10.1038/nrd2380
   Friedberg EC, 2005, MOL CELL, V18, P499, DOI 10.1016/j.molcel.2005.03.032
   Gregory MA, 2000, MOL CELL BIOL, V20, P2423, DOI 10.1128/MCB.20.7.2423-2435.2000
   Gu W, 1997, NATURE, V387, P819, DOI 10.1038/42972
   Hoege C, 2002, NATURE, V419, P135, DOI 10.1038/nature00991
   Hoelz DJ, 2006, PROTEOMICS, V6, P4808, DOI 10.1002/pmic.200600142
   Horiuchi T, 2009, BIOORGAN MED CHEM, V17, P7850, DOI 10.1016/j.bmc.2009.10.039
   Hsi LC, 2004, CANCER RES, V64, P8778, DOI 10.1158/0008-5472.CAN-04-1867
   Humphries W, 2009, J TRANSL MED, V7, DOI 10.1186/1479-5876-7-92
   Ito A, 2001, EMBO J, V20, P1331, DOI 10.1093/emboj/20.6.1331
   Johannessen M, 2004, CELL SIGNAL, V16, P1211, DOI 10.1016/j.cellsig.2004.05.001
   KARIN M, 1995, CURR BIOL, V5, P747, DOI 10.1016/S0960-9822(95)00151-5
   Kurash JK, 2008, MOL CELL, V29, P392, DOI 10.1016/j.molcel.2007.12.025
   Liggett WH, 1998, J CLIN ONCOL, V16, P1197, DOI 10.1200/JCO.1998.16.3.1197
   Malkas LH, 2006, P NATL ACAD SCI USA, V103, P19472, DOI 10.1073/pnas.0604614103
   Meek DW, 2009, NAT REV CANCER, V9, P714, DOI 10.1038/nrc2716
   MEEK DW, 1992, BIOCHEM J, V287, P1
   Melnikova VO, 2009, J BIOL CHEM, V284, P28845, DOI 10.1074/jbc.M109.042150
   Muller S, 2000, J BIOL CHEM, V275, P13321, DOI 10.1074/jbc.275.18.13321
   Naryzhny SN, 2004, J BIOL CHEM, V279, P20194, DOI 10.1074/jbc.M312850200
   Olsen EA, 2007, J CLIN ONCOL, V25, P3109, DOI 10.1200/JCO.2006.10.2434
   Rodriguez MS, 1999, EMBO J, V18, P6455, DOI 10.1093/emboj/18.22.6455
   Seligson DB, 2005, NATURE, V435, P1262, DOI 10.1038/nature03672
   Shankar DB, 2005, CANCER CELL, V7, P351, DOI 10.1016/j.ccr.2005.02.018
   Shi XB, 2007, MOL CELL, V27, P636, DOI 10.1016/j.molcel.2007.07.012
   Stamatopoulos B, 2010, HAEMATOL-HEMATOL J, V95, P1136, DOI 10.3324/haematol.2009.013847
   Sun HX, 2008, CANCER PREV RES, V1, P316, DOI 10.1158/1940-6207.CAPR-07-0002
   Suzuki J, 2009, CLIN CANCER RES, V15, P3163, DOI 10.1158/1078-0432.CCR-08-2319
   TANG Y, 2008, CELL, V27, P133
   Tang Y, 2008, CELL, V133, P612, DOI 10.1016/j.cell.2008.03.025
   Wu FT, 2007, FRONT BIOSCI-LANDMRK, V12, P700, DOI 10.2741/2094
   Xin H, 2009, CANCER RES, V69, P2506, DOI 10.1158/0008-5472.CAN-08-4323
   Xu WS, 2007, ONCOGENE, V26, P5541, DOI 10.1038/sj.onc.1210620
   Yadav N, 2003, P NATL ACAD SCI USA, V100, P6464, DOI 10.1073/pnas.1232272100
   Yang F, 2010, MOL CANCER RES, V8, P35, DOI 10.1158/1541-7786.MCR-09-0220
   Zhang KL, 2005, BIOCHEM BIOPH RES CO, V336, P274, DOI 10.1016/j.bbrc.2005.08.075
   ZHANG Q, 2005, P AM ASSOC CANC RES, V46, P1280
   Zheng YG, 2008, MED RES REV, V28, P645, DOI 10.1002/med.20120
NR 48
TC 18
Z9 19
U1 1
U2 5
PU WILEY
PI HOBOKEN
PA 111 RIVER ST, HOBOKEN 07030-5774, NJ USA
SN 0730-2312
EI 1097-4644
J9 J CELL BIOCHEM
JI J. Cell. Biochem.
PD MAR
PY 2011
VL 112
IS 3
BP 756
EP 760
DI 10.1002/jcb.23002
PG 5
WC Biochemistry & Molecular Biology; Cell Biology
WE Science Citation Index Expanded (SCI-EXPANDED)
SC Biochemistry & Molecular Biology; Cell Biology
GA 728YK
UT WOS:000287910200004
PM 21328449
OA Green Accepted
DA 2022-04-10
ER

PT J
AU Baglo, Y
   Sousa, MML
   Slupphaug, G
   Hagen, L
   Havag, S
   Helander, L
   Zub, KA
   Krokan, HE
   Gederaas, OA
AF Baglo, Yan
   Sousa, Mirta M. L.
   Slupphaug, Geir
   Hagen, Lars
   Havag, Sissel
   Helander, Linda
   Zub, Kamila A.
   Krokan, Hans E.
   Gederaas, Odrun A.
TI Photodynamic therapy with hexyl aminolevulinate induces carbonylation,
   post-translational modification and changed expression of proteins in
   cell survival and cell death pathway
SO PHOTOCHEMICAL & PHOTOBIOLOGICAL SCIENCES
LA English
DT Article
ID 5-AMINOLEVULINIC ACID; OXIDATIVE STRESS; HUMAN SKIN; TOPICAL
   APPLICATION; APOPTOSIS; INDUCTION; ESTER; ALA; PHOTOSENSITIZATION;
   ILLUMINATION
AB Photodynamic therapy (PDT) using blue light and the potent precursor for protoporphyrin IX, hexyl aminolevulinate (HAL), has been shown to induce apoptosis and necrosis in cancer cells, but the mechanism remains obscure. In the present study, we examined protein carbonylation, expression levels and post-translational modification in rat bladder cells (AY-27) after PDT with HAL. Altered levels of expression and/or post-translational modification induced by PDT were observed for numerous proteins, including proteins required for cell mobility, energy supply, cell survival and cell death pathway, by using two-dimensional difference gel electrophoresis (2D-DIGE) and mass spectrometry (MS). Moreover, 10 carbonylated proteins associated with cytoskeleton, transport, oxidative stress response, protein biosynthesis and stability, and DNA repair were identified using immunoprecipitation, two-dimensional gel electrophoresis and MS. Overall, the results indicate that HAL-mediated PDT triggers a complex cellular response involving several biological pathway. Our findings may account for the elucidation of mechanism modulated by PDT, paving the way to improve clinic PDT-efficacy.
C1 [Baglo, Yan; Sousa, Mirta M. L.; Slupphaug, Geir; Hagen, Lars; Havag, Sissel; Helander, Linda; Zub, Kamila A.; Krokan, Hans E.; Gederaas, Odrun A.] Norwegian Univ Sci & Technol, Dept Canc Res & Mol Med, N-7491 Trondheim, Norway.
RP Gederaas, OA (corresponding author), Norwegian Univ Sci & Technol, Dept Canc Res & Mol Med, N-7491 Trondheim, Norway.
EM odrun.gederaas@ntnu.no
RI Slupphaug, Geir/AAN-3794-2020; Gederaas, Odrun Arna/ABE-4912-2020
OI Gederaas, Odrun Arna/0000-0003-4877-4729; Slupphaug,
   Geir/0000-0002-7498-3500
CR Ascencio M, 2008, LASER SURG MED, V40, P332, DOI 10.1002/lsm.20629
   Ascencio M, 2008, PHOTODIAGN PHOTODYN, V5, P210, DOI 10.1016/j.pdpdt.2008.09.004
   Belichenko I, 2001, ARCH BIOCHEM BIOPHYS, V390, P57, DOI 10.1006/abbi.2001.2365
   Berrahmoune S, 2008, PHOTOCH PHOTOBIO SCI, V7, P1018, DOI 10.1039/b804921a
   Burcham PC, 2010, ANTIOXID REDOX SIGN, V12, P337, DOI 10.1089/ars.2009.2817
   Casas A, 2002, BRIT J CANCER, V86, P837, DOI 10.1038/sj.bjc.6600144
   Cecic I, 2006, J ENVIRON PATHOL TOX, V25, P189
   CURRY PM, 1993, PHOTOCHEM PHOTOBIOL, V58, P374, DOI 10.1111/j.1751-1097.1993.tb09577.x
   Dalle-Donne I, 2009, FREE RADICAL BIO MED, V46, P1411, DOI 10.1016/j.freeradbiomed.2009.02.024
   Di Venosa G, 2006, J PHOTOCH PHOTOBIO B, V83, P129, DOI 10.1016/j.jphotobiol.2006.01.002
   Dognitz N, 2008, J PHOTOCH PHOTOBIO B, V93, P140, DOI 10.1016/j.jphotobiol.2008.07.012
   Dougherty TJ, 1998, JNCI-J NATL CANCER I, V90, P889, DOI 10.1093/jnci/90.12.889
   El Khatib S, 2004, J UROLOGY, V172, P2013, DOI 10.1097/01.ju.0000135816.46544.74
   England K, 2005, REDOX REP, V10, P237, DOI 10.1179/135100005X70224
   Furre IE, 2005, CANCER RES, V65, P11051, DOI 10.1158/0008-5472.CAN-05-0510
   Furre IE, 2006, APOPTOSIS, V11, P2031, DOI 10.1007/s10495-006-0190-x
   Gederaas OA, 1996, SCAND J CLIN LAB INV, V56, P583, DOI 10.3109/00365519609090592
   Gederaas OA, 2001, PHOTOCHEM PHOTOBIOL, V73, P164, DOI 10.1562/0031-8655(2001)073<0164:AAMETO>2.0.CO;2
   GEDERAAS OA, 2000, THESIS NTNU NORWEGIA
   GOMER CJ, 1991, CANCER RES, V51, P6574
   Gomer CJ, 1996, CANCER RES, V56, P2355
   GOMER GJ, 1988, LASER SURG MED, V8, P450, DOI 10.1002/lsm.1900080503
   Grebenova D, 2000, PHOTOCHEM PHOTOBIOL, V72, P16, DOI 10.1562/0031-8655(2000)072<0016:PCIHLC>2.0.CO;2
   Hanlon JG, 2001, J PHOTOCH PHOTOBIO B, V64, P55, DOI 10.1016/S1011-1344(01)00189-0
   Juzeniene A, 2006, BRIT J DERMATOL, V155, P791, DOI 10.1111/j.1365-2133.2006.07484.x
   Juzeniene A, 2008, PHOTODIAGN PHOTODYN, V5, P176, DOI 10.1016/j.pdpdt.2008.07.001
   Khidekel N, 2004, ORG BIOMOL CHEM, V2, P1, DOI 10.1039/b312466e
   Kirdaite G, 2002, ARTHRITIS RHEUM, V46, P1371, DOI 10.1002/art.10199
   Kjaersgard IVH, 2004, J AGR FOOD CHEM, V52, P7101, DOI 10.1021/jf049573b
   Kloek J, 1998, PHOTOCHEM PHOTOBIOL, V67, P150
   Korbelik M, 2005, CANCER RES, V65, P1018
   Lam M, 2001, J BIOL CHEM, V276, P47379, DOI 10.1074/jbc.M107678200
   Larsen ELP, 2008, J BIOMED OPT, V13, DOI 10.1117/1.2967909
   LEE C, 1995, CANCER RES, V55, P2063
   Magi B, 2004, CELL DEATH DIFFER, V11, P842, DOI 10.1038/sj.cdd.4401427
   Mann M, 2003, NAT BIOTECHNOL, V21, P255, DOI 10.1038/nbt0303-255
   Marti A, 2003, J UROLOGY, V170, P428, DOI 10.1097/01.ju.0000075054.38441.2d
   Moor ACE, 2000, J PHOTOCH PHOTOBIO B, V57, P1, DOI 10.1016/S1011-1344(00)00065-8
   Nonaka M, 2004, PHOTOCHEM PHOTOBIOL, V79, P94, DOI 10.1111/j.1751-1097.2004.tb09862.x
   Reinheckel T, 2000, ARCH BIOCHEM BIOPHYS, V376, P59, DOI 10.1006/abbi.1999.1680
   Reynaert NL, 2006, P NATL ACAD SCI USA, V103, P13086, DOI 10.1073/pnas.0603290103
   Rud E, 2000, PHOTOCHEM PHOTOBIOL, V71, P640, DOI 10.1562/0031-8655(2000)071<0640:AABNAA>2.0.CO;2
   Schoenebeck B, 2005, MOL CELL NEUROSCI, V30, P249, DOI 10.1016/j.mcn.2005.07.017
   SCHOENFELD N, 1988, CANCER LETT, V43, P43, DOI 10.1016/0304-3835(88)90211-X
   Selbo PK, 2010, J CONTROL RELEASE, V148, P2, DOI 10.1016/j.jconrel.2010.06.008
   Shahzidi S, 2006, J ENVIRON PATHOL TOX, V25, P159, DOI 10.1615/JEnvironPatholToxicolOncol.v25.i1-2.90
   Shevchenko A, 1996, ANAL CHEM, V68, P850, DOI 10.1021/ac950914h
   Soergel P, 2008, LASER SURG MED, V40, P611, DOI 10.1002/lsm.20686
   Stadtman ER, 2000, ANN NY ACAD SCI, V899, P191
   Tsaytler PA, 2008, J PROTEOME RES, V7, P3868, DOI 10.1021/pr800189q
   Vaucher L, 2007, LASER SURG MED, V39, P67, DOI 10.1002/lsm.20416
   Wadey AL, 2009, J NEUROCHEM, V109, P101, DOI 10.1111/j.1471-4159.2009.05936.x
   Wu RWK, 2006, CANCER LETT, V242, P112, DOI 10.1016/j.canlet.2005.10.048
   Wu SM, 2003, ACTA BIOCH BIOPH SIN, V35, P655
   Yanase S, 2005, INT J ONCOL, V27, P193
   Zenzen V, 2003, CANCER LETT, V202, P35, DOI 10.1016/j.canlet.2003.07.001
   Zhao L, 2006, J ENVIRON PATHOL TOX, V25, P307, DOI 10.1615/JEnvironPatholToxicolOncol.v25.i1-2.200
NR 57
TC 15
Z9 15
U1 0
U2 0
PU SPRINGERNATURE
PI LONDON
PA CAMPUS, 4 CRINAN ST, LONDON, N1 9XW, ENGLAND
SN 1474-905X
EI 1474-9092
J9 PHOTOCH PHOTOBIO SCI
JI Photochem. Photobiol. Sci.
PY 2011
VL 10
IS 7
BP 1137
EP 1145
DI 10.1039/c0pp00369g
PG 9
WC Biochemistry & Molecular Biology; Biophysics; Chemistry, Physical
WE Science Citation Index Expanded (SCI-EXPANDED)
SC Biochemistry & Molecular Biology; Biophysics; Chemistry
GA 785CZ
UT WOS:000292206300005
PM 21448498
DA 2022-04-10
ER

PT J
AU Wang, LQ
   Chim, CS
AF Wang, Lu Qian
   Chim, Chor Sang
TI DNA methylation of tumor-suppressor miRNA genes in chronic lymphocytic
   leukemia
SO EPIGENOMICS
LA English
DT Review
DE chronic lymphocytic leukemia; DNA methylation; miRNAs; tumor suppressor
ID WNT SIGNALING PATHWAY; EPIGENETIC INACTIVATION; DOWN-REGULATION; GENOMIC
   ABERRATIONS; MICRORNA EXPRESSION; TCL1 EXPRESSION; NONCODING RNAS;
   CANCER; HYPERMETHYLATION; SURVIVAL
AB DNA methylation is one of the most important epigenetic modifications of the genome involved in the regulation of numerous cellular processes through gene silencing without altering DNA sequences. miRNAs, a class of single-stranded noncoding RNAs of 19-25 nucleotides in length, function as post-transcriptional regulators of gene expression leading to mRNA cleavage or translational repression of their corresponding target protein-coding genes. Recently, dysregulation of tumor suppressor miRNAs mediated by promoter DNA hypermethylation is implicated in human cancers, including B-cell chronic lymphocytic leukemia (CLL). Moreover, it appears that methylated miRNA genes could be potential biomarkers for CLL diagnosis or therapy. This review will highlight the role of aberrant methylation of miRNA genes in the pathogenesis of CLL.
C1 [Wang, Lu Qian; Chim, Chor Sang] Univ Hong Kong, Queen Mary Hosp, Dept Med, Hong Kong, Hong Kong, Peoples R China.
RP Chim, CS (corresponding author), Univ Hong Kong, Queen Mary Hosp, Dept Med, Hong Kong, Hong Kong, Peoples R China.
EM jcschim@hku.hk
OI Chim, CS/0000-0003-2427-915X
CR Agirre X, 2009, CANCER RES, V69, P4443, DOI 10.1158/0008-5472.CAN-08-4025
   Baer C, 2012, CANCER RES, V72, P3775, DOI 10.1158/0008-5472.CAN-12-0803
   Bandres E, 2009, INT J CANCER, V125, P2737, DOI 10.1002/ijc.24638
   Bartel DP, 2009, CELL, V136, P215, DOI 10.1016/j.cell.2009.01.002
   Bartel DP, 2004, CELL, V116, P281, DOI 10.1016/S0092-8674(04)00045-5
   Berger AH, 2011, NATURE, V476, P163, DOI 10.1038/nature10275
   Bichi R, 2002, P NATL ACAD SCI USA, V99, P6955, DOI 10.1073/pnas.102181599
   Blum KA, 2010, BRIT J HAEMATOL, V150, P189, DOI 10.1111/j.1365-2141.2010.08213.x
   Bueno MJ, 2008, CANCER CELL, V13, P496, DOI 10.1016/j.ccr.2008.04.018
   Caligaris-Cappio F, 2014, SEMIN CANCER BIOL, V24, P43, DOI 10.1016/j.semcancer.2013.06.010
   Calin GA, 2002, P NATL ACAD SCI USA, V99, P15524, DOI 10.1073/pnas.242606799
   Calin GA, 2004, P NATL ACAD SCI USA, V101, P2999, DOI 10.1073/pnas.0307323101
   Calin GA, 2005, NEW ENGL J MED, V353, P1793, DOI 10.1056/NEJMoa050995
   Calin GA, 2004, P NATL ACAD SCI USA, V101, P11755, DOI 10.1073/pnas.0404432101
   Calin GA, 2008, P NATL ACAD SCI USA, V105, P5166, DOI 10.1073/pnas.0800121105
   Cardinaud B, 2009, LEUKEMIA, V23, P2174, DOI 10.1038/leu.2009.125
   Chen CZ, 2005, NEW ENGL J MED, V353, P1768, DOI 10.1056/NEJMp058190
   Chen SS, 2011, BLOOD, V117, P862, DOI 10.1182/blood-2010-05-284638
   Chen SS, 2009, P NATL ACAD SCI USA, V106, P13433, DOI 10.1073/pnas.0906455106
   Chim CS, 2008, J CLIN PATHOL, V61, P1214, DOI 10.1136/jcp.2008.060152
   Chim CS, 2007, LEUKEMIA, V21, P2527, DOI 10.1038/sj.leu.2404939
   Chim CS, 2006, J CLIN PATHOL, V59, P921, DOI 10.1136/jcp.2005.035089
   Chim CS, 2006, J HUM GENET, V51, P832, DOI 10.1007/s10038-006-0029-x
   Chim CS, 2010, CARCINOGENESIS, V31, P745, DOI 10.1093/carcin/bgq033
   Chim CS, 2011, J CELL MOL MED, V15, P2760, DOI 10.1111/j.1582-4934.2011.01274.x
   Chim CS, 2002, HEMATOL ONCOL, V20, P167, DOI 10.1002/hon.694
   Chim CS, 2004, BLOOD, V103, P4630, DOI 10.1182/blood-2003-06-2007
   Chiorazzi N, 2005, NEW ENGL J MED, V352, P804, DOI 10.1056/NEJMra041720
   Cimmino A, 2005, P NATL ACAD SCI USA, V102, P13944, DOI 10.1073/pnas.0506654102
   Corney DC, 2010, CLIN CANCER RES, V16, P1119, DOI 10.1158/1078-0432.CCR-09-2642
   Crespo M, 2003, NEW ENGL J MED, V348, P1764, DOI 10.1056/NEJMoa023143
   Croce CM, 2009, NAT REV GENET, V10, P704, DOI 10.1038/nrg2634
   Cuni S, 2004, LEUKEMIA, V18, P1391, DOI 10.1038/sj.leu.2403398
   Deneberg S, 2014, EPIGENETICS, V9
   Dohner H, 2000, NEW ENGL J MED, V343, P1910, DOI 10.1056/NEJM200012283432602
   Esteller M, 1999, CANCER RES, V59, P67
   Esteller M, 2008, NEW ENGL J MED, V358, P1148, DOI 10.1056/NEJMra072067
   Esteller M, 2007, HUM MOL GENET, V16, pR50, DOI 10.1093/hmg/ddm018
   Esteller M, 2011, NAT REV GENET, V12, P861, DOI 10.1038/nrg3074
   Fabbri G, 2011, J EXP MED, V208, P1389, DOI 10.1084/jem.20110921
   Fabbri M, 2011, JAMA-J AM MED ASSOC, V305, P59, DOI 10.1001/jama.2010.1919
   Fulci V, 2007, BLOOD, V109, P4944, DOI 10.1182/blood-2006-12-062398
   Furman RR, 2000, J IMMUNOL, V164, P2200, DOI 10.4049/jimmunol.164.4.2200
   Furuta M, 2010, CARCINOGENESIS, V31, P766, DOI 10.1093/carcin/bgp250
   Gallardo E, 2009, CARCINOGENESIS, V30, P1903, DOI 10.1093/carcin/bgp219
   GONZALEZZULUETA M, 1995, CANCER RES, V55, P4531
   Guo LM, 2009, FEBS J, V276, P5537, DOI 10.1111/j.1742-4658.2009.07237.x
   Haferlach C, 2007, LEUKEMIA, V21, P2442, DOI 10.1038/sj.leu.2404935
   Hamblin TJ, 1999, BLOOD, V94, P1848, DOI 10.1182/blood.V94.6.1848
   Heller G, 2012, CLIN CANCER RES, V18, P1619, DOI 10.1158/1078-0432.CCR-11-2450
   Hermeking H, 2010, CELL DEATH DIFFER, V17, P193, DOI 10.1038/cdd.2009.56
   Huang YW, 2009, CANCER RES, V69, P9038, DOI 10.1158/0008-5472.CAN-09-1499
   Jones PA, 2001, NATURE, V409, P141, DOI 10.1038/35051677
   Jones PA, 2007, CELL, V128, P683, DOI 10.1016/j.cell.2007.01.029
   Klein U, 2010, CANCER CELL, V17, P28, DOI 10.1016/j.ccr.2009.11.019
   Knudson AG, 1997, J CLIN ONCOL, V15, P3280, DOI 10.1200/JCO.1997.15.10.3280
   Krober A, 2002, BLOOD, V100, P1410, DOI 10.1182/blood.V100.4.1410.h81602001410_1410_1416
   Kulis M, 2012, NAT GENET, V44, P1236, DOI 10.1038/ng.2443
   Laird PW, 2005, HUM MOL GENET, V14, pR65, DOI 10.1093/hmg/ddi113
   Lee KH, 2009, PANCREATOLOGY, V9, P293, DOI 10.1159/000186051
   Li SQ, 2011, PLOS ONE, V6, DOI 10.1371/journal.pone.0016956
   Lodygin D, 2008, CELL CYCLE, V7, P2591, DOI 10.4161/cc.7.16.6533
   Longo PG, 2008, BLOOD, V111, P846, DOI 10.1182/blood-2007-05-089037
   Lu DS, 2004, P NATL ACAD SCI USA, V101, P3118, DOI 10.1073/pnas.0308648100
   Lujambio A, 2008, P NATL ACAD SCI USA, V105, P13556, DOI 10.1073/pnas.0803055105
   Ma L, 2010, NAT CELL BIOL, V12, P247, DOI 10.1038/ncb2024
   Mercer TR, 2009, NAT REV GENET, V10, P155, DOI 10.1038/nrg2521
   Mori T, 2005, J CLIN ONCOL, V23, P9351, DOI 10.1200/JCO.2005.02.9876
   Nass D, 2009, BRAIN PATHOL, V19, P375, DOI 10.1111/j.1750-3639.2008.00184.x
   Oscier DG, 2002, BLOOD, V100, P1177, DOI 10.1182/blood.V100.4.1177.h81602001177_1177_1184
   Pallasch CP, 2009, BLOOD, V114, P3255, DOI 10.1182/blood-2009-06-229898
   Pedersen IM, 2004, LEUKEMIA LYMPHOMA, V45, P2365, DOI 10.1080/10428190412331272703
   Pekarsky Y, 2006, CANCER RES, V66, P11590, DOI 10.1158/0008-5472.CAN-06-3613
   Pekarsky Y, 2008, P NATL ACAD SCI USA, V105, P19643, DOI 10.1073/pnas.0810965105
   Pigazzi M, 2009, CANCER RES, V69, P2471, DOI 10.1158/0008-5472.CAN-08-3404
   Pleyer L, 2009, NAT REV CLIN ONCOL, V6, P405, DOI 10.1038/nrclinonc.2009.72
   Portela A, 2010, NAT BIOTECHNOL, V28, P1057, DOI 10.1038/nbt.1685
   Prensner JR, 2011, CANCER DISCOV, V1, P391, DOI 10.1158/2159-8290.CD-11-0209
   Puente XS, 2011, NATURE, V475, P101, DOI 10.1038/nature10113
   Quesada V, 2012, NAT GENET, V44, P47, DOI 10.1038/ng.1032
   Raval A, 2007, CELL, V129, P879, DOI 10.1016/j.cell.2007.03.043
   Robertson KD, 2005, NAT REV GENET, V6, P597, DOI 10.1038/nrg1655
   Saini S, 2012, CANCER RES, V72, P3618, DOI 10.1158/0008-5472.CAN-12-0540
   Santanam U, 2010, P NATL ACAD SCI USA, V107, P12210, DOI 10.1073/pnas.1007186107
   Schraivogel D, 2011, EMBO J, V30, P4309, DOI 10.1038/emboj.2011.301
   Silber J, 2008, BMC MED, V6, DOI 10.1186/1741-7015-6-14
   Stamatopoulos B, 2009, BLOOD, V113, P5237, DOI 10.1182/blood-2008-11-189407
   Thiagalingam S, 2002, CURR OPIN ONCOL, V14, P65, DOI 10.1097/00001622-200201000-00012
   Toyota M, 2008, CANCER RES, V68, P4123, DOI 10.1158/0008-5472.CAN-08-0325
   Tsai KW, 2011, EPIGENETICS-US, V6, P1189, DOI 10.4161/epi.6.10.16535
   Tsai KW, 2011, INT J CANCER, V129, P2600, DOI 10.1002/ijc.25919
   Visone R, 2011, BLOOD, V118, P3072, DOI 10.1182/blood-2011-01-333484
   Visone R, 2009, BLOOD, V114, P3872, DOI 10.1182/blood-2009-06-229211
   Vogt M, 2011, VIRCHOWS ARCH, V458, P313, DOI 10.1007/s00428-010-1030-5
   Vousden KH, 2002, NAT REV CANCER, V2, P594, DOI 10.1038/nrc864
   Wang LL, 2011, NEW ENGL J MED, V365, P2497, DOI 10.1056/NEJMoa1109016
   Wang LQ, 2014, J TRANSL MED, V12, DOI 10.1186/1479-5876-12-52
   Wang LQ, 2013, MOL CANCER, V12, DOI 10.1186/1476-4598-12-173
   Wang LQ, 2012, EXPERT REV MOL DIAGN, V12, P755, DOI [10.1586/erm.12.64, 10.1586/ERM.12.64]
   Wang P, 2014, ONCOGENE, V33, P514, DOI 10.1038/onc.2012.598
   Wilting SM, 2010, MOL CANCER, V9, DOI 10.1186/1476-4598-9-167
   Wong KY, 2011, PLOS ONE, V6, DOI 10.1371/journal.pone.0019027
   Wong KY, 2011, EPIGENOMICS-UK, V3, P83, DOI 10.2217/EPI.10.74
   Wong KY, 2013, J HEMATOL ONCOL, V6, DOI 10.1186/1756-8722-6-16
   Wong KY, 2011, BRIT J HAEMATOL, V154, P569, DOI 10.1111/j.1365-2141.2011.08782.x
   Wu JJ, 2010, CELL CYCLE, V9, P1809, DOI 10.4161/cc.9.9.11535
   Xia JT, 2012, J PATHOL, V227, P470, DOI 10.1002/path.4030
   Yamakuchi M, 2009, CELL CYCLE, V8, P712, DOI 10.4161/cc.8.5.7753
   Yue ZY, 2003, P NATL ACAD SCI USA, V100, P15077, DOI 10.1073/pnas.2436255100
   Zenz T, 2010, J CLIN ONCOL, V28, P4473, DOI 10.1200/JCO.2009.27.8762
   Zhang HY, 2012, MOL CANCER THER, V11, P1454, DOI 10.1158/1535-7163.MCT-12-0001
   Zhang YJ, 2007, CLIN CANCER RES, V13, P2378, DOI 10.1158/1078-0432.CCR-06-1900
   Zhu DX, 2012, CARCINOGENESIS, V33, P1294, DOI 10.1093/carcin/bgs179
NR 113
TC 14
Z9 16
U1 1
U2 9
PU FUTURE MEDICINE LTD
PI LONDON
PA UNITEC HOUSE, 3RD FLOOR, 2 ALBERT PLACE, FINCHLEY CENTRAL, LONDON, N3
   1QB, ENGLAND
SN 1750-1911
EI 1750-192X
J9 EPIGENOMICS-UK
JI Epigenomics
PY 2015
VL 7
IS 3
BP 461
EP 473
DI 10.2217/epi.15.6
PG 13
WC Genetics & Heredity
WE Science Citation Index Expanded (SCI-EXPANDED)
SC Genetics & Heredity
GA CK5DF
UT WOS:000356241700011
PM 25650645
DA 2022-04-10
ER

PT J
AU Nawata, S
   Shi, HY
   Sugino, N
   Zhang, M
AF Nawata, Shugo
   Shi, Heidi Y.
   Sugino, Norihiro
   Zhang, Ming
TI Evidence of post-translational modification of the tumor suppressor
   maspin under oxidative stress
SO INTERNATIONAL JOURNAL OF MOLECULAR MEDICINE
LA English
DT Article
DE maspin; tumor suppressive serpin; oxidative stress; post-translational
   modification
ID PANCREATIC DUCTAL ADENOCARCINOMA; EXPRESSION PATTERNS; SERPIN; MAMMARY;
   CANCER; PROGRESSION; OXIDANTS; GENE
AB Maspin, identified as a 42 kDa unique tumor suppressive serine protease inhibitor (serpin), has multifaceted biological functions by interacting with various target molecules under physiological and pathological conditions including oxidative Stress. However, the type of post-translational modification that confers the specific binding affinity of maspin to target molecules, such as glutathione S-transferase (GST), has not been determined. The aim of this study, therefore, is to analyze the molecular heterogeneity of maspin and to identify its modifications in the normal mammary epithelial cell line, MCF-10A, which is known to express the maspin protein abundantly, using electrophoretic analysis. Conventional SDS-PAGE analysis of MCF-10A cell extracts showed that endogenous maspin is composed of both an intact form observed as a 42 kDa band and a smaller form observed as a 36 kDa band. Interestingly, a brief exposure of MCF-10A cells to 10 mM hydrogen peroxide (H2O2) led to the appearance of a novel endogenous maspin form, as demonstrated by non-denaturing PAGE and non-reducing SDS-PAGE. Two-dimensional sequential non-reducing/reducing SDS-PAGE supported that this novel form was generated by intramolecular disulfide-bonded linkage under oxidative stress, and this oxidized maspin form also existed under physiological conditions. Furthermore, a glutathione (GSH) bead pull-down assay revealed that the intramolecular disulfide-bonded maspin lost its binding activity to endogenous GST, indicating that intramolecular disulfide-bonded maspin might have some distinct properties under oxidative stress, although the precise biological significance of this modification remains elusive. In conclusion, we have shown that maspin undertakes different modifications under oxidative stress.
C1 [Nawata, Shugo; Sugino, Norihiro] Yamaguchi Univ, Sch Med, Dept Obstet & Gynecol, Ube, Yamaguchi 7558505, Japan.
   [Shi, Heidi Y.; Zhang, Ming] Northwestern Univ, Feinberg Sch Med, Robert H Lurie Comprehens Canc Ctr, Chicago, IL 60614 USA.
   [Shi, Heidi Y.; Zhang, Ming] Northwestern Univ, Feinberg Sch Med, Ctr Genet Med, Dept Mol Pharmacol & Biol Chem, Chicago, IL 60614 USA.
RP Nawata, S (corresponding author), Yamaguchi Univ, Sch Med, Dept Obstet & Gynecol, Minami Kogushi 1-1-1, Ube, Yamaguchi 7558505, Japan.
EM shugo@yamaguchi-u.ac.jp
FU Ministry of Education, Culture, Sports, Science and Technology,
   JapanMinistry of Education, Culture, Sports, Science and Technology,
   Japan (MEXT) [20591949]; NIHUnited States Department of Health & Human
   ServicesNational Institutes of Health (NIH) - USA [CA79736]; NATIONAL
   CANCER INSTITUTEUnited States Department of Health & Human
   ServicesNational Institutes of Health (NIH) - USANIH National Cancer
   Institute (NCI) [R01CA079736] Funding Source: NIH RePORTER
FX This study was supported in part by a Grant-in-Aid for Scientific
   Research (20591949) from the Ministry of Education, Culture, Sports,
   Science and Technology, Japan to S.N., and by the NIH CA79736 grant to
   M.Z.
CR Bailey CM, 2006, J CELL PHYSIOL, V209, P617, DOI 10.1002/jcp.20782
   BEATTY K, 1980, J BIOL CHEM, V255, P3931
   Brennan JP, 2004, J BIOL CHEM, V279, P41352, DOI 10.1074/jbc.M403827200
   Cao DF, 2007, MODERN PATHOL, V20, P570, DOI 10.1038/modpathol.3800772
   Cella N, 2006, FASEB J, V20, P1510, DOI 10.1096/fj.05-5500fje
   Cumming RC, 2004, J BIOL CHEM, V279, P21749, DOI 10.1074/jbc.M312267200
   Finkel T, 2000, NATURE, V408, P239, DOI 10.1038/35041687
   Forsberg L, 2001, ARCH BIOCHEM BIOPHYS, V389, P84, DOI 10.1006/abbi.2001.2295
   Hogg PJ, 2003, TRENDS BIOCHEM SCI, V28, P210, DOI 10.1016/S0968-0004(03)00057-4
   Hong SN, 2009, ONCOL REP, V21, P425, DOI 10.3892/or_00000240
   Janciauskiene S, 2001, BBA-MOL BASIS DIS, V1535, P221, DOI 10.1016/S0925-4439(01)00025-4
   Khalkhali-Ellis Z, 2006, CLIN CANCER RES, V12, P7279, DOI 10.1158/1078-0432.CCR-06-1589
   Latha K, 2005, MOL CELL BIOL, V25, P1737, DOI 10.1128/MCB.25.5.1737-1748.2005
   Law RHP, 2005, J BIOL CHEM, V280, P22356, DOI 10.1074/jbc.M412043200
   Lee HM, 2001, MECH AGEING DEV, V122, P355, DOI 10.1016/S0047-6374(00)00254-2
   Li ZJ, 2009, AM J PHYSIOL-LUNG C, V297, pL388, DOI 10.1152/ajplung.90373.2008
   Nawata S, 2001, ELECTROPHORESIS, V22, P161, DOI 10.1002/1522-2683(200101)22:1<161::AID-ELPS161>3.0.CO;2-X
   Nawata S, 2006, ONCOL REP, V16, P399
   Odero-Marah VA, 2002, BIOCHEM BIOPH RES CO, V295, P800, DOI 10.1016/S0006-291X(02)00764-7
   Seftor REB, 1998, CANCER RES, V58, P5681
   Sheng S, 1996, P NATL ACAD SCI USA, V93, P11669, DOI 10.1073/pnas.93.21.11669
   Sheng SJ, 2006, J CELL PHYSIOL, V209, P631, DOI 10.1002/jcp.20786
   Sies H, 1997, EXP PHYSIOL, V82, P291, DOI 10.1113/expphysiol.1997.sp004024
   Smith SL, 2003, ONCOGENE, V22, P8677, DOI 10.1038/sj.onc.1207127
   Sood AK, 2002, CLIN CANCER RES, V8, P2924
   Yin SP, 2005, J BIOL CHEM, V280, P34985, DOI 10.1074/jbc.M503522200
   Zhang M, 2004, FRONT BIOSCI, V9, P2218, DOI 10.2741/1392
   ZOU ZQ, 1994, SCIENCE, V263, P526, DOI 10.1126/science.8290962
NR 28
TC 8
Z9 8
U1 0
U2 2
PU SPANDIDOS PUBL LTD
PI ATHENS
PA POB 18179, ATHENS, 116 10, GREECE
SN 1107-3756
EI 1791-244X
J9 INT J MOL MED
JI Int. J. Mol. Med.
PD FEB
PY 2011
VL 27
IS 2
BP 249
EP 254
DI 10.3892/ijmm.2010.572
PG 6
WC Medicine, Research & Experimental
WE Science Citation Index Expanded (SCI-EXPANDED)
SC Research & Experimental Medicine
GA 714CN
UT WOS:000286785200012
PM 21132260
OA Bronze
DA 2022-04-10
ER

PT J
AU Gamage, DG
   Hendrickson, TL
AF Gamage, Dilani G.
   Hendrickson, Tamara L.
TI GPI Transamidase and GPI anchored proteins: Oncogenes and biomarkers for
   cancer
SO CRITICAL REVIEWS IN BIOCHEMISTRY AND MOLECULAR BIOLOGY
LA English
DT Review
DE Cancer; glycosylphosphatidylinositol anchor; GPI; GPI anchored proteins;
   post-translational protein modifications
ID GLYCOSYL-PHOSPHATIDYLINOSITOL-ANCHOR; COMPARATIVE GENOMIC HYBRIDIZATION;
   CDC91L1 PIG-U; UROKINASE PLASMINOGEN-ACTIVATOR; SULFATE PROTEOGLYCAN
   GLYPICAN-1; FOLATE RECEPTOR-ALPHA; GLYCOSYLPHOSPHATIDYLINOSITOL-ANCHOR;
   MEMBRANE-PROTEINS; TRYPANOSOMA-BRUCEI; DNA-SEQUENCES
AB Cancer is second only to heart disease as a cause of death in the US, with a further negative economic impact on society. Over the past decade, details have emerged which suggest that different glycosylphosphatidylinositol (GPI)-anchored proteins are fundamentally involved in a range of cancers. This post-translational glycolipid modification is introduced into proteins via the action of the enzyme GPI transamidase (GPI-T). In 2004, PIG-U, one of the subunits of GPI-T, was identified as an oncogene in bladder cancer, offering a direct connection between GPI-T and cancer. GPI-T is a membrane-bound, multi-subunit enzyme that is poorly understood, due to its structural complexity and membrane solubility. This review is divided into three sections. First, we describe our current understanding of GPI-T, including what is known about each subunit and their roles in the GPI-T reaction. Next, we review the literature connecting GPI-T to different cancers with an emphasis on the variations in GPI-T subunit over-expression. Finally, we discuss some of the GPI-anchored proteins known to be involved in cancer onset and progression and that serve as potential biomarkers for disease-selective therapies. Given that functions for only one of GPI-T's subunits have been robustly assigned, the separation between healthy and malignant GPI-T activity is poorly defined.
C1 [Gamage, Dilani G.; Hendrickson, Tamara L.] Wayne State Univ, Dept Chem, Detroit, MI 48202 USA.
RP Hendrickson, TL (corresponding author), Wayne State Univ, Dept Chem, 5101 Cass Ave, Detroit, MI 48202 USA.
EM Tamara.Hendrickson@chem.wayne.edu
CR Aceto J, 1999, BIOCHEMISTRY-US, V38, P992, DOI 10.1021/bi9810914
   Ak G, 2012, PREP BIOCHEM BIOTECH, V42, P551, DOI 10.1080/10826068.2012.662926
   Almasi CE, 2011, PROSTATE, V71, P899, DOI 10.1002/pros.21306
   Almeida A, 2009, BBA-MOL BASIS DIS, V1792, P874, DOI 10.1016/j.bbadis.2008.12.010
   Amato RJ, 2013, J IMMUNOTHER, V36, P268, DOI 10.1097/CJI.0b013e3182917f59
   American Cancer Society, 2011, GLOB CANC FACTS FIG
   Andres SA, 2012, J CLIN LAB ANAL, V26, P93, DOI 10.1002/jcla.21488
   Apweiler R, 2012, NUCLEIC ACIDS RES, V40, pD71, DOI 10.1093/nar/gkr981
   Ashida H, 2005, MOL BIOL CELL, V16, P1439, DOI 10.1091/mbc.E04-09-0802
   Ast T, 2013, CELL, V152, P1134, DOI 10.1016/j.cell.2013.02.003
   Asuthkar S, 2012, J BIOL CHEM, V287, P20576, DOI 10.1074/jbc.M112.348888
   Balsara BR, 1997, CANCER RES, V57, P2116
   Benghezal M, 1996, EMBO J, V15, P6575, DOI 10.1002/j.1460-2075.1996.tb01048.x
   BISHOP JM, 1991, CELL, V64, P235, DOI 10.1016/0092-8674(91)90636-D
   Brodsky RA, 2006, LEUKEMIA LYMPHOMA, V47, P1215, DOI 10.1080/10428190600555520
   Bujanda L, 2013, PLOS ONE, V8, DOI 10.1371/journal.pone.0051810
   Burgula S, 2012, CHEM-EUR J, V18, P1194, DOI 10.1002/chem.201102545
   Cagle PT, 2013, ARCH PATHOL LAB MED, V137, P241, DOI 10.5858/arpa.2012-0176-OA
   CARAS IW, 1989, J CELL BIOL, V108, P1387, DOI 10.1083/jcb.108.4.1387
   Chen HY, 2004, MOL CELL BIOL, V24, P10558, DOI 10.1128/MCB.24.24.10558-10572.2004
   Chen LM, 2001, J BIOL CHEM, V276, P21434, DOI 10.1074/jbc.M011423200
   Chen R, 2003, J CELL BIOCHEM, V88, P1025, DOI 10.1002/jcb.10439
   Chen R, 2009, J PROTEOME RES, V8, P651, DOI 10.1021/pr8008012
   Conway WC, 2006, J CELL BIOCHEM, V98, P1507, DOI 10.1002/jcb.20819
   CONZELMANN A, 1992, EMBO J, V11, P457, DOI 10.1002/j.1460-2075.1992.tb05075.x
   Costa FP, 2009, CLINICS, V64, P641, DOI 10.1590/S1807-59322009000700006
   COYNE KE, 1993, J BIOL CHEM, V268, P6689
   Dasgupta S, 2012, INT J ONCOL, V41, P1405, DOI 10.3892/ijo.2012.1567
   De Groot PWJ, 2005, FUNGAL GENET BIOL, V42, P657, DOI 10.1016/j.fgb.2005.04.002
   Eisenhaber B, 1998, PROTEIN ENG, V11, P1155, DOI 10.1093/protein/11.12.1155
   Eisenhaber B, 1999, J MOL BIOL, V292, P741, DOI 10.1006/jmbi.1999.3069
   Eisenhaber B, 2003, BIOESSAYS, V25, P367, DOI 10.1002/bies.10254
   Eisenhaber B, 2001, PROTEIN ENG, V14, P17, DOI 10.1093/protein/14.1.17
   ELLIS V, 1992, ANN NY ACAD SCI, V667, P13, DOI 10.1111/j.1749-6632.1992.tb51591.x
   ENGLUND PT, 1993, ANNU REV BIOCHEM, V62, P121, DOI 10.1146/annurev.bi.62.070193.001005
   Ertongur S, 2004, INT J CANCER, V110, P815, DOI 10.1002/ijc.20192
   Fani M, 2012, MOL PHARMACEUT, V9, P1136, DOI 10.1021/mp200418f
   Fankhauser N, 2005, BIOINFORMATICS, V21, P1846, DOI 10.1093/bioinformatics/bti299
   Ferguson MAJ, 1999, J CELL SCI, V112, P2799
   FERGUSON MAJ, 1988, SCIENCE, V239, P753, DOI 10.1126/science.3340856
   Filmus J, 2001, J CLIN INVEST, V108, P497, DOI 10.1172/JCI13712
   Fischer CR, 2012, BIOCONJUGATE CHEM, V23, P805, DOI 10.1021/bc200660z
   Fisher RE, 2008, J NUCL MED, V49, P899, DOI 10.2967/jnumed.107.049478
   Fraering P, 2001, MOL BIOL CELL, V12, P3295, DOI 10.1091/mbc.12.10.3295
   Fujita M, 2008, BBA-GEN SUBJECTS, V1780, P410, DOI 10.1016/j.bbagen.2007.08.009
   Fujita M, 2012, BBA-MOL CELL BIOL L, V1821, P1050, DOI 10.1016/j.bbalip.2012.01.004
   Fujita M, 2010, FEBS LETT, V584, P1670, DOI 10.1016/j.febslet.2009.10.079
   Galian C, 2012, J BIOL CHEM, V287, P16399, DOI 10.1074/jbc.M112.350009
   GERBER LD, 1992, J BIOL CHEM, V267, P12168
   Goren D, 2000, CLIN CANCER RES, V6, P1949
   Grimme SJ, 2004, MOL BIOL CELL, V15, P2758, DOI 10.1091/mbc.E04-01-0035
   Guan XY, 1996, CANCER RES, V56, P3446
   Guo ZM, 2004, NAT MED, V10, P374, DOI 10.1038/nm1010
   HAMBURGER D, 1995, J CELL BIOL, V129, P629, DOI 10.1083/jcb.129.3.629
   Hazenbos WLW, 2004, BLOOD, V104, P2825, DOI 10.1182/blood-2004-02-0671
   Hiroi Y, 1998, FEBS LETT, V421, P252, DOI 10.1016/S0014-5793(97)01576-7
   Ho JC, 2006, INT J CANCER, V119, P1330, DOI 10.1002/ijc.22005
   Ho M, 2011, EUR J CANCER, V47, P333, DOI 10.1016/j.ejca.2010.10.024
   Hong Y, 2000, J BIOL CHEM, V275, P20911, DOI 10.1074/jbc.M001913200
   Hong YJ, 1999, J BIOL CHEM, V274, P35099, DOI 10.1074/jbc.274.49.35099
   Hong YJ, 2003, MOL BIOL CELL, V14, P1780, DOI 10.1091/mbc.E02-12-0794
   Huang C, 2004, CELL CYCLE, V3, P4, DOI 10.4161/cc.3.1.601
   Inoue N, 1999, CYTOGENET CELL GENET, V84, P199, DOI 10.1159/000015258
   Ishiguro T, 2008, CANCER RES, V68, P9832, DOI 10.1158/0008-5472.CAN-08-1973
   JANKUN J, 1992, CANCER RES, V52, P5829
   Jiang WW, 2007, MOL CANCER, V6, DOI 10.1186/1476-4598-6-74
   John F, 2010, ORG LETT, V12, P2080, DOI 10.1021/ol100575q
   KALLIONIEMI A, 1994, P NATL ACAD SCI USA, V91, P2156, DOI 10.1073/pnas.91.6.2156
   KALLIONIEMI A, 1995, GENE CHROMOSOME CANC, V12, P213, DOI 10.1002/gcc.2870120309
   Kamena F, 2008, NAT CHEM BIOL, V4, P238, DOI 10.1038/nchembio.75
   Kang JY, 2005, J BIOL CHEM, V280, P9489, DOI 10.1074/jbc.M413867200
   Kang XD, 2002, J CELL SCI, V115, P2529
   Kawagoe K, 1996, BLOOD, V87, P3600, DOI 10.1182/blood.V87.9.3600.bloodjournal8793600
   Kim H, 2003, AM J RESP CELL MOL, V29, P694, DOI 10.1165/rcmb.2003-0061OC
   Kleeff J, 1998, J CLIN INVEST, V102, P1662, DOI 10.1172/JCI4105
   KODUKULA K, 1991, J BIOL CHEM, V266, P4464
   Konda SD, 2001, MAGN RESON MATER PHY, V12, P104, DOI 10.1016/S1352-8661(01)00106-5
   Koumarianou E, 2012, APPL RADIAT ISOTOPES, V70, P2669, DOI 10.1016/j.apradiso.2012.08.004
   Krawitz PM, 2013, AM J HUM GENET, V92, P584, DOI 10.1016/j.ajhg.2013.03.011
   Kurokawa Y, 2004, J EXP CLIN CANC RES, V23, P135
   Kvarnung M, 2013, J MED GENET, V50, P521, DOI 10.1136/jmedgenet-2013-101654
   LACEY SW, 1989, J CLIN INVEST, V84, P715, DOI 10.1172/JCI114220
   Leamon CP, 2002, BIOCONJUGATE CHEM, V13, P1200, DOI 10.1021/bc0200430
   LEIDICH SD, 1994, J BIOL CHEM, V269, P10193
   Leung F, 2013, CLIN BIOCHEM, DOI [10.1016/j.clinbiochem.2013.03.010, DOI 10.1016/J.CLINBI0CHEM.2013.03.010]
   Li M, 1997, EXP CELL RES, V235, P3, DOI 10.1006/excr.1997.3629
   Lidell ME, 2011, DIABETES, V60, P427, DOI 10.2337/db10-0409
   Litwack ED, 1998, DEV DYNAM, V211, P72, DOI 10.1002/(SICI)1097-0177(199801)211:1<72::AID-AJA7>3.0.CO;2-4
   LoRusso PM, 2012, J CLIN ONCOL, V30, P4011, DOI 10.1200/JCO.2011.41.4946
   LU CF, 1994, MOL CELL BIOL, V14, P4825, DOI 10.1128/MCB.14.7.4825
   Maeda Y, 2001, EMBO J, V20, P250, DOI 10.1093/emboj/20.1.250
   MASTERSON WJ, 1989, CELL, V56, P793, DOI 10.1016/0092-8674(89)90684-3
   MCCONVILLE MJ, 1993, BIOCHEM J, V294, P305, DOI 10.1042/bj2940305
   Meitzler JL, 2007, ARCH BIOCHEM BIOPHYS, V462, P83, DOI 10.1016/j.abb.2007.03.035
   Mekkawy AH, 2009, FUTURE ONCOL, V5, P1487, DOI 10.2217/FON.09.108
   Meyer U, 2000, BIOCHEMISTRY-US, V39, P3461, DOI 10.1021/bi992186o
   MICANOVIC R, 1990, P NATL ACAD SCI USA, V87, P7939, DOI 10.1073/pnas.87.20.7939
   MORAN P, 1991, J BIOL CHEM, V266, P1250
   MORAN P, 1994, J CELL BIOL, V125, P333, DOI 10.1083/jcb.125.2.333
   MORAN P, 1991, J CELL BIOL, V115, P329, DOI 10.1083/jcb.115.2.329
   Morissette R, 2012, BIOSCIENCE REP, V32, P577, DOI 10.1042/BSR20120064
   Muller C, 2012, J NUCL MED, V53, P1951, DOI 10.2967/jnumed.112.107540
   Mukai Y, 2010, TRENDS INFORM SCI CO, P106, DOI [10.1109/TISC.2010.5714617, DOI 10.1109/TISC.2010.5714617]
   Mukai Y, 2013, BIOSCI BIOTECH BIOCH, V77, P526, DOI 10.1271/bbb.120781
   Murakami Y, 2005, MOL BIOL CELL, V16, P5236, DOI 10.1091/mbc.E05-08-0743
   Murakami Y, 2003, MOL BIOL CELL, V14, P4285, DOI 10.1091/mbc.E03-03-0193
   Murthy SS, 2000, ONCOGENE, V19, P410, DOI 10.1038/sj.onc.1203322
   Nagamune K, 2003, P NATL ACAD SCI USA, V100, P10682, DOI 10.1073/pnas.1833260100
   Nagpal JK, 2008, MODERN PATHOL, V21, P979, DOI 10.1038/modpathol.2008.76
   Nakatsura T, 2003, BIOCHEM BIOPH RES CO, V306, P16, DOI 10.1016/S0006-291X(03)00908-2
   Nakatsura T, 2004, CLIN CANCER RES, V10, P8630, DOI 10.1158/1078-0432.CCR-04-1177
   Nozaki M, 1999, LAB INVEST, V79, P293
   O'Shannessy DJ, 2012, SPRINGERPLUS, V1, DOI 10.1186/2193-1801-1-22
   Ohishi K, 2000, MOL BIOL CELL, V11, P1523, DOI 10.1091/mbc.11.5.1523
   Ohishi K, 2003, J BIOL CHEM, V278, P13959, DOI 10.1074/jbc.M300586200
   Ohishi K, 2001, EMBO J, V20, P4088, DOI 10.1093/emboj/20.15.4088
   OSSOWSKI L, 1983, CELL, V35, P611, DOI 10.1016/0092-8674(83)90093-4
   Park JS, 2011, CARCINOGENESIS, V32, P175, DOI 10.1093/carcin/bgq241
   Paulick MG, 2008, BIOCHEMISTRY-US, V47, P6991, DOI 10.1021/bi8006324
   Paulick MG, 2007, J AM CHEM SOC, V129, P11543, DOI 10.1021/ja073271j
   Pere H, 1998, CANCER RES, V58, P892
   Pierleoni A, 2008, BMC BIOINFORMATICS, V9, DOI 10.1186/1471-2105-9-392
   Pilia G, 1996, NAT GENET, V12, P241, DOI 10.1038/ng0396-241
   Pittet M, 2007, BBA-MOL CELL BIOL L, V1771, P405, DOI 10.1016/j.bbalip.2006.05.015
   Ploug M, 2001, BIOCHEMISTRY-US, V40, P12157, DOI 10.1021/bi010662g
   PLOUG M, 1991, J BIOL CHEM, V266, P1926
   Poisson Guylaine, 2007, Genomics Proteomics & Bioinformatics, V5, P121, DOI 10.1016/S1672-0229(07)60022-9
   PRUSINER SB, 1991, SCIENCE, V252, P1515, DOI 10.1126/science.1675487
   Ramalingam S, 1996, P NATL ACAD SCI USA, V93, P7528, DOI 10.1073/pnas.93.15.7528
   Rea VEA, 2013, MOL CANCER THER, V12, P1402, DOI 10.1158/1535-7163.MCT-12-1249
   Rooney PH, 1999, BRIT J CANCER, V80, P862, DOI 10.1038/sj.bjc.6690433
   Rossier Bernard C, 2004, Proc Am Thorac Soc, V1, P4, DOI 10.1513/pats.2306007
   Sakashita K, 2008, J SURG ONCOL, V98, P559, DOI 10.1002/jso.21158
   Saw WG, 2013, BIOSCIENCE REP, V33, P361, DOI 10.1042/BSR20120107
   Schild L, 2001, ADV EXP MED BIOL, V502, P305
   Schoenberg M, 1996, J UROLOGY, V155, P1035, DOI 10.1016/S0022-5347(01)66380-8
   Schofield L, 2002, NATURE, V418, P785, DOI 10.1038/nature00937
   Schultz IJ, 2005, INT J CANCER, V116, P282, DOI 10.1002/ijc.21040
   Selzer-Plon J, 2009, BMC CANCER, V9, DOI 10.1186/1471-2407-9-201
   Shao N, 2004, ANGEW CHEM INT EDIT, V43, P1569, DOI 10.1002/anie.200353251
   SHEN F, 1995, BIOCHEMISTRY-US, V34, P5660, DOI 10.1021/bi00016a042
   Shen YJ, 2008, BJU INT, V101, P113, DOI 10.1111/j.1464-410X.2007.07192.x
   Siegel BA, 2003, J NUCL MED, V44, P700
   Solberg H, 2001, J HISTOCHEM CYTOCHEM, V49, P237, DOI 10.1177/002215540104900211
   Sonoda G, 1997, GENE CHROMOSOME CANC, V20, P320
   Takahashi M, 1996, EMBO J, V15, P4254, DOI 10.1002/j.1460-2075.1996.tb00800.x
   Takahashi S, 2003, PROSTATE, V54, P187, DOI 10.1002/pros.10178
   Takos AM, 2000, PLANT J, V21, P43, DOI 10.1046/j.1365-313x.2000.00651.x
   Taron BW, 2004, J BIOL CHEM, V279, P36083, DOI 10.1074/jbc.M405081200
   Tiede A, 2000, INT J BIOCHEM CELL B, V32, P339, DOI 10.1016/S1357-2725(99)00122-3
   Toh YK, 2011, J STRUCT BIOL, V173, P271, DOI 10.1016/j.jsb.2010.11.026
   Tsuchiya N, 2002, AM J PATHOL, V160, P1799, DOI 10.1016/S0002-9440(10)61126-1
   Ueda Y, 2007, J BIOL CHEM, V282, P30373, DOI 10.1074/jbc.M705601200
   Umezu T, 2010, CANCER SCI, V101, P143, DOI 10.1111/j.1349-7006.2009.01382.x
   Vainauskas S, 2004, J BIOL CHEM, V279, P6540, DOI 10.1074/jbc.M312191200
   Vainauskas S, 2002, J BIOL CHEM, V277, P30535, DOI 10.1074/jbc.M205402200
   Vainauskas S, 2012, CARBOHYD RES, V362, P62, DOI 10.1016/j.carres.2012.09.012
   Varma Y, 2010, CHEMBIOCHEM, V11, P623, DOI 10.1002/cbic.200900704
   Vastag B, 2000, J NATL CANCER I, V92, P1800, DOI 10.1093/jnci/92.22.1800
   Vishwakarma RA, 2005, CHEM COMMUN, P453, DOI 10.1039/b413196g
   Waldron NN, 2012, ORAL ONCOL, V48, P1202, DOI 10.1016/j.oraloncology.2012.06.002
   Watanabe R, 2000, EMBO J, V19, P4402, DOI 10.1093/emboj/19.16.4402
   Watanabe R, 1998, EMBO J, V17, P877, DOI 10.1093/emboj/17.4.877
   Watanabe R, 1999, BIOCHEM J, V339, P185, DOI 10.1042/0264-6021:3390185
   WILHELM O, 1994, FEBS LETT, V337, P131, DOI 10.1016/0014-5793(94)80259-9
   Wilting S, 2006, J PATHOL, V209, P220, DOI 10.1002/path.1966
   Wood LD, 2012, ONCOTARGET, V3, P668
   Wu GJ, 2006, CANCER RES, V66, P9829, DOI 10.1158/0008-5472.CAN-06-0506
   XIA MQ, 1993, BIOCHEM J, V293, P633, DOI 10.1042/bj2930633
   Xiang YY, 2001, ONCOGENE, V20, P7408, DOI 10.1038/sj.onc.1204925
   YAN W, 1995, BIOCHEMISTRY-US, V34, P14594, DOI 10.1021/bi00044a039
   Yiping H, 2009, J EPITH BIOL PHARM, V2, P14
   Yokota T, 1999, CANCER LETT, V139, P7, DOI 10.1016/S0304-3835(98)00329-2
   Zacks MA, 2006, MOL MEMBR BIOL, V23, P209, DOI 10.1080/09687860600601494
   Zhao P, 2012, J BIOL CHEM, V287, P25230, DOI 10.1074/jbc.M112.339465
   Zhu YH, 2005, BBA-MOL CELL BIOL L, V1735, P79, DOI 10.1016/j.bbalip.2005.05.001
NR 176
TC 31
Z9 32
U1 3
U2 19
PU TAYLOR & FRANCIS LTD
PI ABINGDON
PA 2-4 PARK SQUARE, MILTON PARK, ABINGDON OR14 4RN, OXON, ENGLAND
SN 1040-9238
EI 1549-7798
J9 CRIT REV BIOCHEM MOL
JI Crit. Rev. Biochem. Mol. Biol.
PD SEP-OCT
PY 2013
VL 48
IS 5
BP 446
EP 464
DI 10.3109/10409238.2013.831024
PG 19
WC Biochemistry & Molecular Biology
WE Science Citation Index Expanded (SCI-EXPANDED)
SC Biochemistry & Molecular Biology
GA 229PY
UT WOS:000325280700003
PM 23978072
DA 2022-04-10
ER

PT J
AU Betts, MJ
   Lu, QH
   Jiang, YY
   Drusko, A
   Wichmann, O
   Utz, M
   Valtierra-Gutierrez, IA
   Schlesner, M
   Jaeger, N
   Jones, DT
   Pfister, S
   Lichter, P
   Eils, R
   Siebert, R
   Bork, P
   Apic, G
   Gavin, AC
   Russell, RB
AF Betts, Matthew J.
   Lu, Qianhao
   Jiang, YingYing
   Drusko, Armin
   Wichmann, Oliver
   Utz, Mathias
   Valtierra-Gutierrez, Ilse A.
   Schlesner, Matthias
   Jaeger, Natalie
   Jones, David T.
   Pfister, Stefan
   Lichter, Peter
   Eils, Roland
   Siebert, Reiner
   Bork, Peer
   Apic, Gordana
   Gavin, Anne-Claude
   Russell, Robert B.
TI Mechismo: predicting the mechanistic impact of mutations and
   modifications on molecular interactions
SO NUCLEIC ACIDS RESEARCH
LA English
DT Article
ID INTERACTION DATABASE; STRUCTURAL CLASSIFICATION; PROTEIN; GENOME;
   NETWORKS; RECOGNITION; BINDING; GROWTH; SITES; SCOP
AB Systematic interrogation of mutation or protein modification data is important to identify sites with functional consequences and to deduce global consequences from large data sets. Mechismo (mechismo.russellab.org) enables simultaneous consideration of thousands of 3D structures and biomolecular interactions to predict rapidly mechanistic consequences for mutations and modifications. As useful functional information often only comes from homologous proteins, we benchmarked the accuracy of predictions as a function of protein/structure sequence similarity, which permits the use of relatively weak sequence similarities with an appropriate confidence measure. For protein-protein, protein-nucleic acid and a subset of protein-chemical interactions, we also developed and benchmarked a measure of whether modifications are likely to enhance or diminish the interactions, which can assist the detection of modifications with specific effects. Analysis of high-throughput sequencing data shows that the approach can identify interesting differences between cancers, and application to proteomics data finds potential mechanistic insights for how post-translational modification can alter biomolecular interactions.
C1 [Betts, Matthew J.; Lu, Qianhao; Jiang, YingYing; Drusko, Armin; Wichmann, Oliver; Utz, Mathias; Valtierra-Gutierrez, Ilse A.; Apic, Gordana; Russell, Robert B.] Heidelberg Univ, Cell Networks, D-69120 Heidelberg, Germany.
   [Betts, Matthew J.; Lu, Qianhao; Jiang, YingYing; Drusko, Armin; Wichmann, Oliver; Utz, Mathias; Valtierra-Gutierrez, Ilse A.; Eils, Roland; Apic, Gordana; Russell, Robert B.] Heidelberg Univ, Bioquant, D-69120 Heidelberg, Germany.
   [Schlesner, Matthias; Jaeger, Natalie; Jones, David T.; Pfister, Stefan; Lichter, Peter; Eils, Roland] Deutsch Krebsforschungszentrum, D-69120 Heidelberg, Germany.
   [Eils, Roland] Heidelberg Univ, Dept Bioinformat & Funct Genom, Inst Pharm & Mol Biotechnol, D-69120 Heidelberg, Germany.
   [Siebert, Reiner] Univ Kiel, Univ Klinikum Schleswig Holstein, Inst Humangenet, D-24105 Kiel, Germany.
   [Bork, Peer; Gavin, Anne-Claude] EMBL, D-69117 Heidelberg, Germany.
   [Apic, Gordana] Cambridge Cell Networks Ltd, St Johns Innovat Ctr, Cambridge CB3 0WS, England.
RP Russell, RB (corresponding author), Heidelberg Univ, Cell Networks, Neuenheimer Feld 267, D-69120 Heidelberg, Germany.
EM robertbrucerussell@gmail.com
RI Jones, David TW/G-9588-2013; Russell, Rob/AAH-9145-2019; Pfister, Stefan
   M/F-6860-2013; Jones, David T. W./Z-1963-2019; Eils, Roland/B-6121-2009;
   Schlesner, Matthias/I-4030-2013; Siebert, Reiner/A-8049-2010; Bork,
   Peer/F-1813-2013
OI Jones, David TW/0000-0002-2036-5141; Russell, Rob/0000-0002-1905-4717;
   Pfister, Stefan M/0000-0002-5447-5322; Eils, Roland/0000-0002-0034-4036;
   Schlesner, Matthias/0000-0002-5896-4086; Bork, Peer/0000-0002-2627-833X;
   Russell, Robert Bruce/0000-0002-7213-1398; Gavin,
   Anne-Claude/0000-0003-4917-2340; Jaeger, Natalie/0000-0002-9589-7580;
   Valtierra-Gutierrez, Ilse Ariadna/0000-0003-4128-5914; Betts,
   Matthew/0000-0003-4583-9814
FU European CommunityEuropean Commission [241955]; SYSCILIA; International
   Cancer Genome Sequencing (ICGC) MMML Seq project [01KU1002A, 01KU1002B,
   01KU1002C, 01KU1002D, 01KU1002E, 01KU1002F, 01KU1002G, 01KU1002H,
   01KU1002I, 01KU1002J]; DFG (Deutscheforschung gemeinschaft) - German
   Science Ministry as part of the Cell Networks Excellence
   InitiativeGerman Research Foundation (DFG)
FX European Community's Seventh Framework Programme FP7/2009 [241955];
   SYSCILIA; International Cancer Genome Sequencing (ICGC) MMML Seq project
   (grant 01KU1002A to 01KU1002J). Funding for open access charge: DFG
   (Deutscheforschung gemeinschaft) - German Science Ministry as part of
   the Cell Networks Excellence Initiative.
CR Adzhubei Ivan, 2013, Curr Protoc Hum Genet, VChapter 7, DOI 10.1002/0471142905.hg0720s76
   Aloy P, 2004, SCIENCE, V303, P2026, DOI 10.1126/science.1092645
   Aloy P, 2003, J MOL BIOL, V332, P989, DOI 10.1016/j.jmb.2003.07.006
   Aloy P, 2002, P NATL ACAD SCI USA, V99, P5896, DOI 10.1073/pnas.092147999
   Altschul SF, 1997, NUCLEIC ACIDS RES, V25, P3389, DOI 10.1093/nar/25.17.3389
   Anderson J, 1998, HUM MOL GENET, V7, P1475, DOI 10.1093/hmg/7.9.1475
   Andreeva A, 2008, NUCLEIC ACIDS RES, V36, pD419, DOI 10.1093/nar/gkm993
   Bader GD, 2003, NUCLEIC ACIDS RES, V31, P248, DOI 10.1093/nar/gkg056
   Bendl J, 2014, PLOS COMPUT BIOL, V10, DOI 10.1371/journal.pcbi.1003440
   Biankin AV, 2012, NATURE, V491, P399, DOI 10.1038/nature11547
   Bolser D, 2003, BMC BIOINFORMATICS, V4, DOI 10.1186/1471-2105-4-45
   Chatr-aryamontri A, 2013, NUCLEIC ACIDS RES, V41, pD816, DOI 10.1093/nar/gks1158
   Chen Jake Y., 2009, V541, P449, DOI 10.1007/978-1-59745-243-4_19
   Choudhary C, 2010, NAT REV MOL CELL BIO, V11, P427, DOI 10.1038/nrm2900
   Cote R, 2010, NUCLEIC ACIDS RES, V38, pW155, DOI 10.1093/nar/gkq331
   David A, 2012, HUM MUTAT, V33, P359, DOI 10.1002/humu.21656
   Dosztanyi Z, 2005, BIOINFORMATICS, V21, P3433, DOI 10.1093/bioinformatics/bti541
   Dutta S, 2010, J APPL CRYSTALLOGR, V43, P1224, DOI 10.1107/S002188981002371X
   Finn RD, 2014, NUCLEIC ACIDS RES, V42, pD222, DOI [10.1093/nar/gkt263, 10.1093/nar/gkt1223]
   Flicek P, 2014, NUCLEIC ACIDS RES, V42, pD749, DOI 10.1093/nar/gkt1196
   Fox NK, 2014, NUCLEIC ACIDS RES, V42, pD304, DOI 10.1093/nar/gkt1240
   Gonzalez-Perez A, 2011, AM J HUM GENET, V88, P440, DOI 10.1016/j.ajhg.2011.03.004
   Goyal K, 2008, PROTEINS, V70, P1206, DOI 10.1002/prot.21601
   Harding MM, 2004, ACTA CRYSTALLOGR D, V60, P849, DOI 10.1107/S0907444904004081
   Herz HM, 2014, SCIENCE, V345, P1065, DOI 10.1126/science.1255104
   Hubbard SJ., 1993, NACCESS COMPUT PROGR
   Jones DTW, 2012, NATURE, V488, P100, DOI 10.1038/nature11284
   KABSCH W, 1983, BIOPOLYMERS, V22, P2577, DOI 10.1002/bip.360221211
   Kalinina OV, 2011, PLOS COMPUT BIOL, V7, DOI 10.1371/journal.pcbi.1002043
   Kerrien S, 2012, NUCLEIC ACIDS RES, V40, pD841, DOI 10.1093/nar/gkr1088
   Kiefer Florian, 2009, Nucleic Acids Res, V37, pD387, DOI 10.1093/nar/gkn750
   Kilpivaara O, 2013, SCIENCE, V339, P1559, DOI 10.1126/science.1233899
   Kim MY, 2006, MOL ENDOCRINOL, V20, P1479, DOI 10.1210/me.2005-0531
   Kuhner S, 2009, SCIENCE, V326, P1235, DOI 10.1126/science.1176343
   Kumar P, 2009, NAT PROTOC, V4, P1073, DOI 10.1038/nprot.2009.86
   Laskowski RA, 1996, PROTEIN SCI, V5, P2438
   Law V, 2014, NUCLEIC ACIDS RES, V42, pD1091, DOI 10.1093/nar/gkt1068
   Licata L, 2012, NUCLEIC ACIDS RES, V40, pD857, DOI 10.1093/nar/gkr930
   Macek B, 2008, MOL CELL PROTEOMICS, V7, P299, DOI 10.1074/mcp.M700311-MCP200
   Moretti R, 2013, PROTEINS, V81, P1980, DOI 10.1002/prot.24356
   Mosca R, 2013, NAT METHODS, V10, P47, DOI [10.1038/nmeth.2289, 10.1038/NMETH.2289]
   Ng PC, 2006, ANNU REV GENOM HUM G, V7, P61, DOI 10.1146/annurev.genom.7.080505.115630
   O'Boyle NM, 2011, J CHEMINFORMATICS, V3, DOI 10.1186/1758-2946-3-33
   Ofran Y, 2003, J MOL BIOL, V325, P377, DOI 10.1016/S0022-2836(02)01223-8
   Pieper U, 2011, NUCLEIC ACIDS RES, V39, pD465, DOI 10.1093/nar/gkq1091
   Rajagopala SV, 2014, NAT BIOTECHNOL, V32, P285, DOI 10.1038/nbt.2831
   Reva B, 2011, NUCLEIC ACIDS RES, V39, pE118, DOI 10.1093/nar/gkr407
   Richter J, 2012, NAT GENET, V44, P1316, DOI 10.1038/ng.2469
   Rohde M, 2014, GENE CHROMOSOME CANC, V53, P911, DOI 10.1002/gcc.22202
   SALI A, 1993, J MOL BIOL, V234, P779, DOI 10.1006/jmbi.1993.1626
   Salwinski L, 2004, NUCLEIC ACIDS RES, V32, pD449, DOI 10.1093/nar/gkh086
   Shirohzu H, 2002, AM J MED GENET, V112, P31, DOI 10.1002/ajmg.10658
   SIPPL MJ, 1990, J MOL BIOL, V213, P859, DOI 10.1016/S0022-2836(05)80269-4
   Stein A, 2011, NUCLEIC ACIDS RES, V39, pD718, DOI 10.1093/nar/gkq962
   Tuncbag N, 2008, J MOL BIOL, V381, P785, DOI 10.1016/j.jmb.2008.04.071
   Wang XJ, 2012, NAT BIOTECHNOL, V30, P159, DOI 10.1038/nbt.2106
   Winter C, 2006, NUCLEIC ACIDS RES, V34, pD310, DOI 10.1093/nar/gkj099
   Wiszniewski W, 2003, IMMUNOGENETICS, V54, P747, DOI 10.1007/s00251-002-0521-1
   Wu CH, 2006, NUCLEIC ACIDS RES, V34, pD187, DOI 10.1093/nar/gkj161
   Yates CM, 2013, J MOL BIOL, V425, P3949, DOI 10.1016/j.jmb.2013.07.012
   Yu HY, 2008, SCIENCE, V322, P104, DOI 10.1126/science.1158684
   Zhang QC, 2012, NATURE, V490, P556, DOI 10.1038/nature11503
   Zhong Q, 2009, MOL SYST BIOL, V5, DOI 10.1038/msb.2009.80
NR 63
TC 50
Z9 50
U1 1
U2 12
PU OXFORD UNIV PRESS
PI OXFORD
PA GREAT CLARENDON ST, OXFORD OX2 6DP, ENGLAND
SN 0305-1048
EI 1362-4962
J9 NUCLEIC ACIDS RES
JI Nucleic Acids Res.
PD JAN 30
PY 2015
VL 43
IS 2
AR e10
DI 10.1093/nar/gku1094
PG 11
WC Biochemistry & Molecular Biology
WE Science Citation Index Expanded (SCI-EXPANDED)
SC Biochemistry & Molecular Biology
GA CC2XR
UT WOS:000350209000004
PM 25392414
OA gold, Green Published, Green Submitted
DA 2022-04-10
ER

PT J
AU Morey, L
   Helin, K
AF Morey, Lluis
   Helin, Kristian
TI Polycomb group protein-mediated repression of transcription
SO TRENDS IN BIOCHEMICAL SCIENCES
LA English
DT Review
ID TUMOR-SUPPRESSOR ACTIVITY; HISTONE H2A; TARGET GENES; CELL-CYCLE;
   METHYLTRANSFERASE ACTIVITY; CHROMATIN-ASSOCIATION; RESPONSE ELEMENTS;
   H3K4 DEMETHYLASE; NONCODING RNAS; X-CHROMOSOME
AB The polycomb group (PcG) proteins are essential for the normal development of multicellular organisms. They form multi-protein complexes that work as transcriptional repressors of several thousand genes controlling differentiation pathway during development. How the PcG proteins work as transcriptional repressors is incompletely understood, but involves post-translational modification of histones by two major PcG protein complexes: polycomb repressive complex 1 and polycomb repressive complex 2.
C1 [Morey, Lluis; Helin, Kristian] Univ Copenhagen, BRIC, DK-2200 Copenhagen, Denmark.
   [Morey, Lluis; Helin, Kristian] Ctr Epigenet, DK-2200 Copenhagen, Denmark.
RP Helin, K (corresponding author), Univ Copenhagen, BRIC, Ole Maaloes Vej 5, DK-2200 Copenhagen, Denmark.
EM kristian.helin@bric.ku.dk
RI Helin, Kristian/K-2526-2019
OI Helin, Kristian/0000-0003-1975-6097; Morey, Lluis/0000-0001-9851-4066
FU Danish National Research FoundationDanmarks Grundforskningsfond; Danish
   Cancer SocietyDanish Cancer Society; Lundbeck FoundationLundbeckfonden;
   Novo Nordisk FoundationNovo Nordisk FoundationNovocure Limited; Danish
   Medical Research CouncilDanish Medical Research CouncilUK Research &
   Innovation (UKRI)Medical Research Council UK (MRC); European Molecular
   Biology Organisation; Association for International Cancer Research;
   University of Copenhagen
FX We thank Itys Comet and Julian Walfridsson for their helpful comments on
   the manuscript and members of the Helin research team for discussions.
   The work in the Helin research team is supported by grants from the
   Danish National Research Foundation, the Danish Cancer Society, The
   Lundbeck Foundation, the Novo Nordisk Foundation, the Danish Medical
   Research Council, the European Molecular Biology Organisation, the
   Association for International Cancer Research, and the Excellence
   Program of the University of Copenhagen.
CR Banck MS, 2009, EPIGENETICS-US, V4, P100, DOI 10.4161/epi.4.2.7953
   Ben-Saadon R, 2006, MOL CELL, V24, P701, DOI 10.1016/j.molcel.2006.10.022
   Bernstein E, 2006, MOL CELL BIOL, V26, P2560, DOI 10.1128/MCB.26.7.2560-2569.2006
   Boukarabila H, 2009, GENE DEV, V23, P1195, DOI 10.1101/gad.512009
   Bracken AP, 2007, GENE DEV, V21, P525, DOI 10.1101/gad.415507
   Buchwald G, 2006, EMBO J, V25, P2465, DOI 10.1038/sj.emboj.7601144
   Buschbeck M, 2009, NAT STRUCT MOL BIOL, V16, P1074, DOI 10.1038/nsmb.1665
   Cao R, 2002, SCIENCE, V298, P1039, DOI 10.1126/science.1076997
   Cao R, 2005, MOL CELL, V20, P845, DOI 10.1016/j.molcel.2005.12.002
   Cao R, 2008, MOL CELL BIOL, V28, P1862, DOI 10.1128/MCB.01589-07
   Caretti G, 2004, GENE DEV, V18, P2627, DOI 10.1101/gad.1241904
   Cha TL, 2005, SCIENCE, V310, P306, DOI 10.1126/science.1118947
   Christensen J, 2007, CELL, V128, P1063, DOI 10.1016/j.cell.2007.02.003
   Classen AK, 2009, NAT GENET, V41, P1150, DOI 10.1038/ng.445
   Costanzi C, 1998, NATURE, V393, P599, DOI 10.1038/31275
   Creyghton MP, 2008, CELL, V135, P649, DOI 10.1016/j.cell.2008.09.056
   Czermin B, 2002, CELL, V111, P185, DOI 10.1016/S0092-8674(02)00975-3
   de Napoles M, 2004, DEV CELL, V7, P663, DOI 10.1016/j.devcel.2004.10.005
   Dent AL, 1997, SCIENCE, V276, P589, DOI 10.1126/science.276.5312.589
   Elderkin S, 2007, MOL CELL, V28, P107, DOI 10.1016/j.molcel.2007.08.009
   Fan ZP, 2009, NAT CELL BIOL, V11, P1002, DOI 10.1038/ncb1913
   FAUST C, 1995, DEVELOPMENT, V121, P273
   Fouse SD, 2008, CELL STEM CELL, V2, P160, DOI 10.1016/j.stem.2007.12.011
   Francis NJ, 2004, SCIENCE, V306, P1574, DOI 10.1126/science.1100576
   Gambetta MC, 2009, SCIENCE, V325, P93, DOI 10.1126/science.1169727
   Gearhart MD, 2006, MOL CELL BIOL, V26, P6880, DOI 10.1128/MCB.00630-06
   Guttman M, 2009, NATURE, V458, P223, DOI 10.1038/nature07672
   Henikoff S, 2008, NAT REV GENET, V9, P15, DOI 10.1038/nrg2206
   Hernadez-Munoz I, 2005, P NATL ACAD SCI USA, V102, P7635, DOI 10.1073/pnas.0408918102
   Herranz N, 2008, MOL CELL BIOL, V28, P4772, DOI 10.1128/MCB.00323-08
   Iwase S, 2007, CELL, V128, P1077, DOI 10.1016/j.cell.2007.02.017
   Jiang J, 2008, DEV CELL, V15, P801, DOI 10.1016/j.devcel.2008.11.010
   Kabil O, 2006, BIOCHEMISTRY-US, V45, P13528, DOI 10.1021/bi0615644
   Kagey MH, 2003, CELL, V113, P127, DOI 10.1016/S0092-8674(03)00159-4
   Kennison JA, 1995, ANNU REV GENET, V29, P289, DOI 10.1146/annurev.ge.29.120195.001445
   Khalil AM, 2009, P NATL ACAD SCI USA, V106, P11667, DOI 10.1073/pnas.0904715106
   Kim CA, 2005, J BIOL CHEM, V280, P27769, DOI 10.1074/jbc.M503055200
   Klose RJ, 2007, CELL, V128, P889, DOI 10.1016/j.cell.2007.02.013
   Ku M, 2008, PLOS GENET, V4, DOI 10.1371/journal.pgen.1000242
   Kuzmichev A, 2002, GENE DEV, V16, P2893, DOI 10.1101/gad.1035902
   Lee MG, 2007, CELL, V128, P877, DOI 10.1016/j.cell.2007.02.004
   Lessard J, 2003, NATURE, V423, P255, DOI 10.1038/nature01572
   Leung C, 2004, NATURE, V428, P337, DOI 10.1038/nature02385
   Li B, 2007, BIOCHEM J, V405, P369, DOI 10.1042/BJ20061873
   Li G, 2010, GENE DEV, V24, P368, DOI 10.1101/gad.1886410
   Long JY, 2005, J BIOL CHEM, V280, P35477, DOI 10.1074/jbc.M504477200
   Martinez AM, 2009, NAT GENET, V41, P1076, DOI 10.1038/ng.414
   Morey L, 2008, MOL CELL BIOL, V28, P5912, DOI 10.1128/MCB.00467-08
   Muller J, 2006, CURR OPIN GENET DEV, V16, P476, DOI 10.1016/j.gde.2006.08.005
   Nekrasov M, 2007, EMBO J, V26, P4078, DOI 10.1038/sj.emboj.7601837
   Ng D, 2004, NAT GENET, V36, P411, DOI 10.1038/ng1321
   O'Carroll D, 2001, MOL CELL BIOL, V21, P4330, DOI 10.1128/MCB.21.13.4330-4336.2001
   Oktaba K, 2008, DEV CELL, V15, P877, DOI 10.1016/j.devcel.2008.10.005
   Pandey RR, 2008, MOL CELL, V32, P232, DOI 10.1016/j.molcel.2008.08.022
   Pasini D, 2004, EMBO J, V23, P4061, DOI 10.1038/sj.emboj.7600402
   Pasini D, 2008, GENE DEV, V22, P1345, DOI 10.1101/gad.470008
   Pasini D, 2007, MOL CELL BIOL, V27, P3769, DOI 10.1128/MCB.01432-06
   Pasini D, 2010, NATURE, V464, P306, DOI 10.1038/nature08788
   Peng JC, 2009, CELL, V139, P1290, DOI 10.1016/j.cell.2009.12.002
   Riising EM, 2008, PLOS ONE, V3, DOI 10.1371/journal.pone.0002704
   Ringrose L, 2007, DEVELOPMENT, V134, P223, DOI 10.1242/dev.02723
   Rinn JL, 2007, CELL, V129, P1311, DOI 10.1016/j.cell.2007.05.022
   Roscic A, 2006, MOL CELL, V24, P77, DOI 10.1016/j.molcel.2006.08.004
   Sarma K, 2008, MOL CELL BIOL, V28, P2718, DOI 10.1128/MCB.02017-07
   Schlesinger Y, 2007, NAT GENET, V39, P232, DOI 10.1038/ng1950
   Schoeftner S, 2006, EMBO J, V25, P3110, DOI 10.1038/sj.emboj.7601187
   Shen XH, 2009, CELL, V139, P1303, DOI 10.1016/j.cell.2009.12.003
   Simon JA, 2009, NAT REV MOL CELL BIO, V10, P697, DOI 10.1038/nrm2763
   Sinclair DAR, 2009, P NATL ACAD SCI USA, V106, P13427, DOI 10.1073/pnas.0904638106
   Sing A, 2009, CELL, V138, P885, DOI 10.1016/j.cell.2009.08.020
   Sparmann A, 2006, NAT REV CANCER, V6, P846, DOI 10.1038/nrc1991
   Tahiliani M, 2007, NATURE, V447, P601, DOI 10.1038/nature05823
   Tibbles LA, 1999, CELL MOL LIFE SCI, V55, P1230, DOI 10.1007/s000180050369
   Tie F, 2001, DEVELOPMENT, V128, P275
   Villa R, 2007, CANCER CELL, V11, P513, DOI 10.1016/j.ccr.2007.04.009
   Vire E, 2006, NATURE, V439, P871, DOI 10.1038/nature04431
   Voncken JW, 1999, J CELL SCI, V112, P4627
   Voncken JW, 2005, J BIOL CHEM, V280, P5178, DOI 10.1074/jbc.M407155200
   Voncken JW, 2003, P NATL ACAD SCI USA, V100, P2468, DOI 10.1073/pnas.0434312100
   Wang HB, 2004, NATURE, V431, P873, DOI 10.1038/nature02985
   Wang JB, 2001, NAT GENET, V28, P371, DOI 10.1038/ng574
   Woo CJ, 2010, CELL, V140, P99, DOI 10.1016/j.cell.2009.12.022
   Yamane K, 2007, MOL CELL, V25, P801, DOI 10.1016/j.molcel.2007.03.001
   YE BH, 1993, SCIENCE, V262, P747, DOI 10.1126/science.8235596
   Zhao J, 2008, SCIENCE, V322, P750, DOI 10.1126/science.1163045
   Zhou W, 2008, MOL CELL, V29, P69, DOI 10.1016/j.molcel.2007.11.002
   Zilberman D, 2008, NATURE, V456, P125, DOI 10.1038/nature07324
NR 87
TC 281
Z9 295
U1 1
U2 34
PU ELSEVIER SCIENCE LONDON
PI LONDON
PA 84 THEOBALDS RD, LONDON WC1X 8RR, ENGLAND
SN 0968-0004
EI 1362-4326
J9 TRENDS BIOCHEM SCI
JI Trends Biochem.Sci.
PD JUN
PY 2010
VL 35
IS 6
BP 323
EP 332
DI 10.1016/j.tibs.2010.02.009
PG 10
WC Biochemistry & Molecular Biology
WE Science Citation Index Expanded (SCI-EXPANDED)
SC Biochemistry & Molecular Biology
GA 612ZZ
UT WOS:000278946700003
PM 20346678
DA 2022-04-10
ER

PT J
AU Yang, JH
   Chiou, YY
   Fu, SL
   Shih, IY
   Weng, TH
   Lin, WJ
   Lin, CH
AF Yang, Jen-Hao
   Chiou, Yi-Ying
   Fu, Shu-Ling
   Shih, I-Yun
   Weng, Tsai-Hsuan
   Lin, Wey-Jinq
   Lin, Chao-Hsiung
TI Arginine methylation of hnRNPK negatively modulates apoptosis upon DNA
   damage through local regulation of phosphorylation
SO NUCLEIC ACIDS RESEARCH
LA English
DT Article
ID KINASE-C-DELTA; NUCLEAR-RIBONUCLEOPROTEIN-K; P53 TRANSCRIPTIONAL
   ACTIVATION; MESSENGER-RNA TRANSLATION; SQUAMOUS-CELL CARCINOMA;
   PROTEIN-KINASE; ERYTHROID-DIFFERENTIATION; NASOPHARYNGEAL CARCINOMA;
   CYTOPLASMIC ACCUMULATION; THYMIDINE PHOSPHORYLASE
AB Heterogeneous nuclear ribonucleoprotein K (hnRNPK) is an RNA/DNA-binding protein involved in chromatin remodeling, RNA processing and the DNA damage response. In addition, increased hnRNPK expression has been associated with tumor development and progression. A variety of post-translational modification of hnRNPK have been identified and shown to regulate hnRNPK function, including phosphorylation, ubiquitination, sumoylation and methylation. However, the functional significance of hnRNPK arginine methylation remains unclear. In the present study, we demonstrated that the methylation of two essential arginines, Arg296 and Arg299, on hnRNPK inhibited a nearby Ser302 phosphorylation that was mediated through the pro-apoptotic kinase PKC delta. Notably, the engineered U2OS cells carrying an Arg296/Arg299 methylation-defective hnRNPK mutant exhibited increased apoptosis upon DNA damage. While such elevated apoptosis can be diminished through addition with wild-type hnRNPK, we further demonstrated that this increased apoptosis occurred through both intrinsic and extrinsic pathway and was p53 independent, at least in part. Here, we provide the first evidence that the arginine methylation of hnRNPK negatively regulates cell apoptosis through PKC delta-mediated signaling during DNA damage, which is essential for the antiapoptotic role of hnRNPK in apoptosis and the evasion of apoptosis in cancer cells.
C1 [Yang, Jen-Hao; Weng, Tsai-Hsuan; Lin, Chao-Hsiung] Natl Yang Ming Univ, Dept Life Sci, Taipei 11221, Taiwan.
   [Yang, Jen-Hao; Weng, Tsai-Hsuan; Lin, Chao-Hsiung] Natl Yang Ming Univ, Inst Genome Sci, Taipei 11221, Taiwan.
   [Chiou, Yi-Ying; Shih, I-Yun; Lin, Wey-Jinq; Lin, Chao-Hsiung] Natl Yang Ming Univ, Inst Biopharmaceut Sci, Taipei 11221, Taiwan.
   [Fu, Shu-Ling] Natl Yang Ming Univ, Inst Tradit Med, Taipei 11221, Taiwan.
   [Lin, Chao-Hsiung] Natl Yang Ming Univ, Prote Res Ctr, Taipei 11221, Taiwan.
RP Lin, CH (corresponding author), Natl Yang Ming Univ, Dept Life Sci, Taipei 11221, Taiwan.
EM chlin2@ym.edu.tw
RI 邱, 奕穎/E-8593-2018
OI 邱, 奕穎/0000-0002-8742-8848; Weng, Tsai-Hsuan/0000-0002-3708-6384
FU National Science CouncilMinistry of Science and Technology, Taiwan
   [101-2311-B-010-006, 101-2321-B-010-016, 102-2321-B-010-014]; Taipei
   Veteran's General HospitalTaipei Veterans General Hospital [100-G7-5-1];
   Cheng Hsin General Hospital [101F195CY21]; Ministry of Education, Aiming
   for the Top University Plan in Taiwan
FX National Science Council [101-2311-B-010-006, 101-2321-B-010-016,
   102-2321-B-010-014]; Taipei Veteran's General Hospital [100-G7-5-1];
   Cheng Hsin General Hospital [101F195CY21]; Ministry of Education, Aiming
   for the Top University Plan in Taiwan. Funding for open access charge:
   Personal expense.
CR Allocati N, 2012, EXP CELL RES, V318, P1285, DOI 10.1016/j.yexcr.2012.01.023
   Barboro P, 2009, BRIT J CANCER, V100, P1608, DOI 10.1038/sj.bjc.6605057
   Bedford MT, 2009, MOL CELL, V33, P1, DOI 10.1016/j.molcel.2008.12.013
   Bharti A, 1998, MOL CELL BIOL, V18, P6719, DOI 10.1128/MCB.18.11.6719
   Bomsztyk K, 2004, BIOESSAYS, V26, P629, DOI 10.1002/bies.20048
   Chang YI, 2010, J BIOL CHEM, V285, P20595, DOI 10.1074/jbc.M109.092411
   Charroux B, 1999, MOL CELL BIOL, V19, P7846, DOI 10.1128/mcb.19.11.7846
   Chen C, 2011, NAT REV MOL CELL BIO, V12, P629, DOI 10.1038/nrm3185
   Chen LC, 2010, CELL DEATH DIFFER, V17, P1463, DOI 10.1038/cdd.2010.24
   Chen LC, 2009, ONCOGENE, V28, P1904, DOI 10.1038/onc.2009.55
   Chen LC, 2008, CLIN CANCER RES, V14, P3807, DOI 10.1158/1078-0432.CCR-08-0155
   Chen YB, 2008, FEBS LETT, V582, P1761, DOI 10.1016/j.febslet.2008.04.051
   Chiou YY, 2007, PROTEIN J, V26, P87, DOI 10.1007/s10930-006-9049-9
   Daujat S, 2002, CURR BIOL, V12, P2090, DOI 10.1016/S0960-9822(02)01387-8
   DeVries TA, 2002, EMBO J, V21, P6050, DOI 10.1093/emboj/cdf606
   Di Lorenzo A, 2011, FEBS LETT, V585, P2024, DOI 10.1016/j.febslet.2010.11.010
   Emoto Y, 1995, EMBO J, V14, P6148, DOI 10.1002/j.1460-2075.1995.tb00305.x
   Feliers D, 2007, AM J PHYSIOL-RENAL, V293, pF607, DOI 10.1152/ajprenal.00497.2006
   Gao FH, 2009, EXP CELL RES, V315, P3250, DOI 10.1016/j.yexcr.2009.09.005
   Gao R, 2013, J BIOL CHEM, V288, P15046, DOI 10.1074/jbc.M113.466136
   Gates J, 2000, GENETICS, V156, P1765
   Ghayur T, 1996, J EXP MED, V184, P2399, DOI 10.1084/jem.184.6.2399
   Gong JG, 1999, NATURE, V399, P806
   Guo ZG, 2010, NAT CHEM BIOL, V6, P766, DOI [10.1038/nchembio.422, 10.1038/NCHEMBIO.422]
   Habelhah H, 2001, NAT CELL BIOL, V3, P325, DOI 10.1038/35060131
   Hsu JM, 2011, NAT CELL BIOL, V13, P174, DOI 10.1038/ncb2158
   Inoue A, 2007, P NATL ACAD SCI USA, V104, P8983, DOI 10.1073/pnas.0607595104
   Lagory EL, 2010, J BIOL CHEM, V285, P1879, DOI 10.1074/jbc.M109.055392
   Lee SW, 2012, EMBO J, V31, P4441, DOI 10.1038/emboj.2012.293
   Leitges M, 2001, J CLIN INVEST, V108, P1505
   Liu K, 2010, P NATL ACAD SCI USA, V107, P18398, DOI 10.1073/pnas.1013106107
   Matta A, 2009, INT J CANCER, V125, P1398, DOI 10.1002/ijc.24517
   Melino G, 2002, NAT REV CANCER, V2, P605, DOI 10.1038/nrc861
   Messias AC, 2006, J MOL BIOL, V361, P470, DOI 10.1016/j.jmb.2006.06.025
   Moumen A, 2005, CELL, V123, P1065, DOI 10.1016/j.cell.2005.09.032
   Moumen A, 2013, CELL CYCLE, V12, P698, DOI 10.4161/cc.23592
   Naarmann-de Vries IS, 2013, CELL DEATH DIS, V4, DOI 10.1038/cddis.2013.75
   Ng LFP, 2005, PLOS MED, V2, P673, DOI 10.1371/journal.pmed.0020163
   Ostareck DH, 2001, CELL, V104, P281, DOI 10.1016/S0092-8674(01)00212-4
   Ostareck DH, 1997, CELL, V89, P597, DOI 10.1016/S0092-8674(00)80241-X
   Ostareck-Lederer A, 2006, J BIOL CHEM, V281, P11115, DOI 10.1074/jbc.M513053200
   Pelisch F, 2012, J BIOL CHEM, V287, P30789, DOI 10.1074/jbc.M112.390120
   Piano F, 2002, CURR BIOL, V12, P1959, DOI 10.1016/S0960-9822(02)01301-5
   Pietsch EC, 2008, ONCOGENE, V27, P6507, DOI 10.1038/onc.2008.315
   Porter AG, 1999, CELL DEATH DIFFER, V6, P99, DOI 10.1038/sj.cdd.4400476
   Reyland ME, 2007, BIOCHEM SOC T, V35, P1001, DOI 10.1042/BST0351001
   Roychoudhury P, 2007, BRIT J CANCER, V97, P574, DOI 10.1038/sj.bjc.6603911
   Sakamaki J, 2011, P NATL ACAD SCI USA, V108, P6085, DOI 10.1073/pnas.1015328108
   Schullery DS, 1999, J BIOL CHEM, V274, P15101, DOI 10.1074/jbc.274.21.15101
   Sikorsky T, 2012, NUCLEIC ACIDS RES, V40, P11748, DOI 10.1093/nar/gks929
   Su PT, 2010, PLOS ONE, V5, DOI 10.1371/journal.pone.0009147
   Suganuma T, 2008, CELL, V135, P604, DOI 10.1016/j.cell.2008.10.036
   Urbani A, 2005, PROTEOMICS, V5, P796, DOI 10.1002/pmic.200401147
   van Domselaar R, 2013, CELL DEATH DIFFER, V20, P419, DOI 10.1038/cdd.2012.132
   van Domselaar R, 2012, J BIOL CHEM, V287, P22854, DOI 10.1074/jbc.M112.365692
   Wang F, 2012, MED ONCOL, V29, P1780, DOI 10.1007/s12032-011-0037-3
   WATANABE T, 1992, P NATL ACAD SCI USA, V89, P10159, DOI 10.1073/pnas.89.21.10159
   Wolf D, 2008, CELL HOST MICROBE, V4, P398, DOI 10.1016/j.chom.2008.08.013
   Xiao ZW, 2013, CARCINOGENESIS, V34, P1458, DOI 10.1093/carcin/bgt085
   Yamagata K, 2008, MOL CELL, V32, P221, DOI 10.1016/j.molcel.2008.09.013
   Yang A, 2000, NAT REV MOL CELL BIO, V1, P199, DOI 10.1038/35043127
   Yang YZ, 2013, NAT REV CANCER, V13, P37, DOI 10.1038/nrc3409
   Yoshida K, 2006, J BIOL CHEM, V281, P5734, DOI 10.1074/jbc.M512074200
   Yoshida K, 2003, EMBO J, V22, P1431, DOI 10.1093/emboj/cdg134
   Yoshida K, 2008, TRENDS MOL MED, V14, P305, DOI 10.1016/j.molmed.2008.05.003
   Yoshida K, 2007, CELL SIGNAL, V19, P892, DOI 10.1016/j.cellsig.2007.01.027
   Yuan ZM, 1998, ONCOGENE, V16, P1643, DOI 10.1038/sj.onc.1201698
   Zaika A, 2001, J BIOL CHEM, V276, P11310, DOI 10.1074/jbc.M005737200
   Zhang P, 2010, ELECTROPHORESIS, V31, P1731, DOI 10.1002/elps.200900495
   Zhao M, 2012, ARCH IMMUNOL THER EX, V60, P361, DOI 10.1007/s00005-012-0188-8
   Zhou RY, 2010, INT J CANCER, V126, P395, DOI 10.1002/ijc.24744
NR 71
TC 34
Z9 35
U1 4
U2 19
PU OXFORD UNIV PRESS
PI OXFORD
PA GREAT CLARENDON ST, OXFORD OX2 6DP, ENGLAND
SN 0305-1048
EI 1362-4962
J9 NUCLEIC ACIDS RES
JI Nucleic Acids Res.
PY 2014
VL 42
IS 15
BP 9908
EP 9924
DI 10.1093/nar/gku705
PG 17
WC Biochemistry & Molecular Biology
WE Science Citation Index Expanded (SCI-EXPANDED)
SC Biochemistry & Molecular Biology
GA AQ9ZO
UT WOS:000343220300037
PM 25104022
OA Green Submitted, gold, Green Published
DA 2022-04-10
ER

PT J
AU Jin, HJ
   Daly, DS
   Marks, JR
   Zangar, RC
AF Jin, Hongjun
   Daly, Don S.
   Marks, Jeffrey R.
   Zangar, Richard C.
TI Oxidatively modified proteins as plasma biomarkers in breast cancer
SO CANCER BIOMARKERS
LA English
DT Article
DE Breast cancer; biomarkers; reactive oxygen species; protein adducts;
   hydroxynonenal; glutathione; plasma
ID MAMMARY EPITHELIAL-CELLS; GROWTH-FACTOR RECEPTOR; POTENTIAL BIOMARKERS;
   AUTOCRINE; OXIDANTS; PROMAT
AB BACKGROUND: Post-translational protein modifications (PTMs) are increased in breast tumors.
   OBJECTIVE: We explored whether PTMs on proteins secreted by the breast could be detected in plasma and potentially used for the early detection of breast cancer.
   METHODS: We used a custom ELISA microarray platform to measure 4-hydroxynonenal (HNE), glutathione (GSH), nitrotyrosine and halotyrosine adducts in 27 secreted proteins, for a total of 108 candidate biomarkers. Two independent sets of human plasma samples were measured, for a total of 160 samples. The results were analyzed for consistent cancer-associated changes across the two sample sets. Plasma samples for both cases and benign controls were collected at the time of tissue diagnosis after referral from a positive screen (such as mammography). The results from both studies were evaluated using ANOVA and t-tests or receiver operator curves (ROC).
   RESULTS: Levels of GSH-modified ceruloplasmin and HNE-modified PDGF were significantly altered in plasma samples from cancer patients relative to benign controls. Healthy controls, which were only included in the first set of samples, were similar to the benign controls for both of these markers. A combination of three glutathionylated proteins produced the best area under the ROC curve, with a value of 76%.
   CONCLUSIONS: Specific PTMs in individual proteins may be useful for distinguishing between women with breast cancer and those with benign breast disease. These oxidative changes in plasma proteins may reflect redox changes in breast cancer. Additional studies on oxidative modifications in individual proteins are warranted.
C1 [Jin, Hongjun; Daly, Don S.; Zangar, Richard C.] Pacific NW Natl Lab, Richland, WA 99352 USA.
   [Jin, Hongjun] Washington Univ, Sch Med, Div Radiol Sci, St Louis, MO USA.
   [Marks, Jeffrey R.] Duke Univ, Med Ctr, Dept Surg, Durham, NC 27710 USA.
RP Zangar, RC (corresponding author), Pacific NW Natl Lab, POB 999, Richland, WA 99352 USA.
EM richard.zangar@pnnl.gov
FU NIHUnited States Department of Health & Human ServicesNational
   Institutes of Health (NIH) - USA [U01 CA117378, UO1 CA084955]; US
   Department of Defense BCRP Postdoctoral FellowshipUnited States
   Department of Defense [W81XWH-10-1-0031]; NATIONAL CANCER
   INSTITUTEUnited States Department of Health & Human ServicesNational
   Institutes of Health (NIH) - USANIH National Cancer Institute (NCI)
   [U01CA117378, U01CA084955] Funding Source: NIH RePORTER
FX This research was supported by NIH U01 CA117378 (RCZ), NIH UO1 CA084955
   (JRM), and a US Department of Defense BCRP Postdoctoral Fellowship
   W81XWH-10-1-0031 (HJ).
CR Ambrosone CB, 2000, ANTIOXID REDOX SIGN, V2, P903, DOI 10.1089/ars.2000.2.4-903
   Antelmann H, 2011, ANTIOXID REDOX SIGN, V14, P1049, DOI 10.1089/ars.2010.3400
   Chen WNU, 2004, J BIOL CHEM, V279, P18488, DOI 10.1074/jbc.M310874200
   Daly DS, 2010, STAT APPL GENET MOL, V9, DOI 10.2202/1544-6115.1506
   Gonzalez RM, 2008, J PROTEOME RES, V7, P2406, DOI 10.1021/pr700822t
   Gonzalez RM, 2011, CANCER EPIDEM BIOMAR, V20, P1543, DOI 10.1158/1055-9965.EPI-10-1248
   Gough DR, 2011, CELL DEATH DIS, V2, DOI 10.1038/cddis.2011.96
   Jin H., 2012, CURR PROTOC TOXICOL
   Jin HJ, 2011, ENVIRON HEALTH PERSP, V119, P1314, DOI 10.1289/ehp.1103745
   Jin HJ, 2009, BIOMARK INSIGHTS, V4, P191
   Karihtala P, 2004, ONCOL REP, V12, P755
   Karihtala P, 2006, EUR J CANCER, V42, P2653, DOI 10.1016/j.ejca.2006.05.037
   Karihtala P, 2011, HISTOPATHOLOGY, V58, P854, DOI 10.1111/j.1365-2559.2011.03835.x
   Maemura M, 1998, CANCER LETT, V126, P215, DOI 10.1016/S0304-3835(98)00014-7
   Marx J, 2004, SCIENCE, V306, P966, DOI 10.1126/science.306.5698.966
   MOSES LE, 1993, STAT MED, V12, P1293, DOI 10.1002/sim.4780121403
   R Development Team, 2010, LANG ENV STAT COMP
   Rodland KD, 2008, J BIOL CHEM, V283, P31477, DOI 10.1074/jbc.M800456200
   Samoszuk M, 2002, BREAST CANCER RES TR, V74, P271, DOI 10.1023/A:1016328526866
   Siegel R, 2012, CA-CANCER J CLIN, V62, P10, DOI 10.3322/caac.20138
   Sing T, 2005, BIOINFORMATICS, V21, P3940, DOI 10.1093/bioinformatics/bti623
   Varnum SM, 2003, BREAST CANCER RES TR, V80, P87, DOI 10.1023/A:1024479106887
   Venables W. N., 2002, MODERN APPL STAT S
   White AM, 2006, BIOINFORMATICS, V22, P1278, DOI 10.1093/bioinformatics/btl093
   Woodbury R.L., 2003, ELEVATED HGF LEVELS, P233
   World Health Organization, 2008, FACT SHEET
   Wu WS, 2006, CANCER METAST REV, V25, P695, DOI 10.1007/s10555-006-9037-8
   Wu WJ, 2000, J CLIN INVEST, V105, P1455, DOI 10.1172/JCI9702
   Zangar RC, 2009, J PROTEOME RES, V8, P3937, DOI 10.1021/pr900247n
   Zangar RC, 2011, FREE RADICAL BIO MED, V51, P2041, DOI 10.1016/j.freeradbiomed.2011.09.001
   Zhang Y, 2011, BMC CANCER, V11, DOI 10.1186/1471-2407-11-69
NR 31
TC 7
Z9 7
U1 0
U2 4
PU IOS PRESS
PI AMSTERDAM
PA NIEUWE HEMWEG 6B, 1013 BG AMSTERDAM, NETHERLANDS
SN 1574-0153
EI 1875-8592
J9 CANCER BIOMARK
JI Cancer Biomark.
PY 2013
VL 13
IS 3
BP 193
EP 200
DI 10.3233/CBM-130349
PG 8
WC Oncology
WE Science Citation Index Expanded (SCI-EXPANDED)
SC Oncology
GA 195QQ
UT WOS:000322719100008
PM 23912491
OA Green Accepted
DA 2022-04-10
ER

PT J
AU Cruz, J
   Lemos, B
AF Cruz, Jurandir
   Lemos, Bernardo
TI Post-transcriptional diversity in riboproteins and RNAs in aging and
   cancer
SO SEMINARS IN CANCER BIOLOGY
LA English
DT Article
DE rRNA; Ribosome; Cancer; Epigenetics
ID COPY NUMBER VARIATION; SMALL NUCLEOLAR RNAS; 5S RIBOSOMAL-RNA; CAJAL
   BODIES; HUMAN TELOMERASE; PROTEIN-SYNTHESIS; GENE-REGULATION;
   SPECIALIZED RIBOSOMES; NONCODING RNAS; POLYMERASE III
AB Post-transcriptional (PtscM) and post-translational (PtrnM) modifications of nucleotides and amino acids are covalent modifications able to change physio-chemical properties of RNAs and proteins. In the ribosome, the adequate assembly of rRNAs and ribosomal protein subunits in the nucleolus ensures suitable translational activity, with protein synthesis tuned according to intracellular demands of energy production, replication, proliferation, and growth. Disruption in the regulatory control of PtscM and PtrnM can impair ribosome biogenesis and ribosome function. Ribosomal impairment may, in turn, impact the synthesis of proteins engaged in functions as varied as telomere maintenance, apoptosis, and DNA repair, as well as intersect with mitochondria and telomerase activity. These cellular processes often malfunction in carcinogenesis and senescence. Here we discuss regulatory mechanism of PtscMs and PtrnMs on ribosomal function. We also address chemical modification in rRNAs and their impacts on cellular metabolism, replication control, and senescence. Further, we highlight similarities and differences of PtscMs and PtrnMs in ribosomal intermediates during aging and carcinogenesis. Understanding these regulatory mechanism may uncover critical steps for the development of more efficient oncologic and anti-aging therapies.
C1 [Cruz, Jurandir; Lemos, Bernardo] Harvard TH Chan Sch Publ Hlth, Dept Environm Hlth, Boston, MA 02115 USA.
   [Cruz, Jurandir] Univ Sao Paulo, Fac Med, BR-01246 Sao Paulo, SP, Brazil.
   [Lemos, Bernardo] Broad Inst Harvard & MIT, Cambridge, MA 02142 USA.
RP Lemos, B (corresponding author), Harvard TH Chan Sch Publ Hlth, Dept Environm Hlth, Boston, MA 02115 USA.
EM blemos@hsph.harvard.edu
FU Lemann fellowship; NIEHSUnited States Department of Health & Human
   ServicesNational Institutes of Health (NIH) - USANIH National Institute
   of Environmental Health Sciences (NIEHS) [R01ES027981, P30ES000002]
FX We thank Andrew Driscoll, Amanda Cerqueira, and members of the Lemos lab
   for comments and feedback throughout the writing of this review. JC was
   partially supported by a Lemann fellowship. Work in the Lemos laboratory
   has been supported by NIEHS grants R01ES027981 and P30ES000002.
CR Abdisalaam S, 2020, J BIOL CHEM, V295, P11144, DOI 10.1074/jbc.RA120.012962
   Achi MV, 2000, BIOL REPROD, V63, P591, DOI 10.1095/biolreprod63.2.591
   Anantharaman V, 2002, NUCLEIC ACIDS RES, V30, P1427, DOI 10.1093/nar/30.7.1427
   Baltanas FC, 2011, BRAIN PATHOL, V21, P374, DOI 10.1111/j.1750-3639.2010.00461.x
   Bastide A, 2018, BIOMOLECULES, V8, DOI 10.3390/biom8040100
   Benedetti E, 2015, ONCOTARGET, V6, P42091, DOI 10.18632/oncotarget.5990
   Berciano MT, 2007, J STRUCT BIOL, V158, P410, DOI 10.1016/j.jsb.2006.12.008
   BICKLE TA, 1973, J BIOL CHEM, V248, P4862
   Boguta M, 2013, BBA-GENE REGUL MECH, V1829, P376, DOI 10.1016/j.bbagrm.2012.11.004
   Bohnsack MT, 2018, CELL MOL LIFE SCI, V75, P241, DOI 10.1007/s00018-017-2598-6
   Bourgeois G, 2015, PLOS ONE, V10, DOI 10.1371/journal.pone.0133321
   BRUENGER E, 1993, FASEB J, V7, P196, DOI 10.1096/fasebj.7.1.8422966
   Buchhaupt M, 2014, PLOS ONE, V9, DOI 10.1371/journal.pone.0089640
   Caino MC, 2016, NAT COMMUN, V7, DOI 10.1038/ncomms13730
   Cavaille J, 2017, WIRES RNA, V8, DOI 10.1002/wrna.1417
   Cayir A, 2019, ENVIRON RES, V175, P228, DOI 10.1016/j.envres.2019.05.011
   Cerqueira AV, 2019, TRENDS GENET, V35, P710, DOI 10.1016/j.tig.2019.07.011
   Chen B, 2019, CHEM RES TOXICOL, V32, P2078, DOI 10.1021/acs.chemrestox.9b00249
   Chen CY, 2018, CELL REP, V24, P1852, DOI 10.1016/j.celrep.2018.07.046
   Concepcion CP, 2012, CANCER J, V18, P262, DOI 10.1097/PPO.0b013e318258b60a
   Cong R, 2012, NUCLEIC ACIDS RES, V40, P9441, DOI 10.1093/nar/gks720
   Cristofari G, 2007, MOL CELL, V27, P882, DOI 10.1016/j.molcel.2007.07.020
   Dang CV, 1999, MOL CELL BIOL, V19, P1
   Das S, 2014, PLOS ONE, V9, DOI 10.1371/journal.pone.0096820
   Dennis PP, 2015, BMC GENOMICS, V16, DOI 10.1186/s12864-015-1839-z
   Dominissini D, 2011, CARCINOGENESIS, V32, P1569, DOI 10.1093/carcin/bgr124
   Emmerechts G, 2007, NUCLEIC ACIDS RES, V35, P3494, DOI 10.1093/nar/gkm248
   Enwerem II, 2015, PLOS ONE, V10, DOI 10.1371/journal.pone.0122348
   ERARD MS, 1988, EUR J BIOCHEM, V175, P525, DOI 10.1111/j.1432-1033.1988.tb14224.x
   Fancello L, 2017, ONCOTARGET, V8, P14462, DOI 10.18632/oncotarget.14895
   FELLNER P, 1968, NATURE, V219, P236, DOI 10.1038/219236a0
   Fernandez-Medarde Alberto, 2011, Genes Cancer, V2, P344, DOI 10.1177/1947601911411084
   Ferretti MB, 2019, RNA, V25, P521, DOI 10.1261/rna.069823.118
   Frye M, 2016, DEVELOPMENT, V143, P3871, DOI 10.1242/dev.136556
   Fu LJ, 2014, J AM CHEM SOC, V136, P11582, DOI 10.1021/ja505305z
   Gardiner E, 2012, MOL PSYCHIATR, V17, P827, DOI 10.1038/mp.2011.78
   Genuth NR, 2018, MOL CELL, V71, P364, DOI 10.1016/j.molcel.2018.07.018
   Genuth NR, 2018, NAT REV GENET, V19, P431, DOI 10.1038/s41576-018-0008-z
   Ghoshal K, 2004, J BIOL CHEM, V279, P6783, DOI 10.1074/jbc.M309393200
   Gibbons JG, 2015, P NATL ACAD SCI USA, V112, P2485, DOI 10.1073/pnas.1416878112
   Gibbons JG, 2014, NAT COMMUN, V5, DOI 10.1038/ncomms5850
   GRAY MW, 1979, CAN J BIOCHEM CELL B, V57, P914, DOI 10.1139/o79-111
   GRAY PW, 1979, BIOCHEMISTRY-US, V18, P1820, DOI 10.1021/bi00576a029
   Haneji T, 2012, ACTA HISTOCHEM CYTOC, V45, P1, DOI 10.1267/ahc.11041
   Hartman Hyman, 2006, Archaea, V2, P1, DOI 10.1155/2006/431618
   Heath EM, 2017, LEUKEMIA, V31, P798, DOI 10.1038/leu.2017.30
   Helm M, 2006, NUCLEIC ACIDS RES, V34, P721, DOI 10.1093/nar/gkj471
   Hoeppner MP, 2012, BMC EVOL BIOL, V12, DOI 10.1186/1471-2148-12-183
   Hofman IJF, 2017, HAEMATOLOGICA, V102, pE317, DOI 10.3324/haematol.2016.162198
   Holzmann J, 2008, CELL, V135, P462, DOI 10.1016/j.cell.2008.09.013
   Howard MJ, 2012, P NATL ACAD SCI USA, V109, P16149, DOI 10.1073/pnas.1209062109
   Hubackova S, 2020, CELL DEATH DIS, V11, DOI 10.1038/s41419-020-2224-7
   Huber SM, 2015, CHEMBIOCHEM, V16, P752, DOI 10.1002/cbic.201500013
   Hussain S, 2009, J CELL BIOL, V186, P27, DOI 10.1083/jcb.200810180
   Jady BE, 2006, MOL BIOL CELL, V17, P944, DOI 10.1091/mbc.E05-09-0904
   Jafri MA, 2016, GENOME MED, V8, DOI 10.1186/s13073-016-0324-x
   Janas MM, 2012, MOL CELL, V46, P171, DOI 10.1016/j.molcel.2012.04.008
   Kammeyer A, 2015, AGEING RES REV, V21, P16, DOI 10.1016/j.arr.2015.01.001
   Kapranov P, 2007, SCIENCE, V316, P1484, DOI 10.1126/science.1138341
   Karbstein K, 2013, TRENDS CELL BIOL, V23, P242, DOI 10.1016/j.tcb.2013.01.004
   Khurts S, 2004, J BIOL CHEM, V279, P51508, DOI 10.1074/jbc.M407643200
   Kierzek E, 2014, NUCLEIC ACIDS RES, V42, P3492, DOI 10.1093/nar/gkt1330
   Kim SY, 2018, BIOMOL THER, V26, P39, DOI 10.4062/biomolther.2017.184
   Kiss AM, 2004, MOL CELL BIOL, V24, P5797, DOI 10.1128/MCB.24.13.5797-5807.2004
   Kiss T, 2002, CELL, V109, P145, DOI 10.1016/S0092-8674(02)00718-3
   Klinge S, 2019, NAT REV MOL CELL BIO, V20, P116, DOI 10.1038/s41580-018-0078-y
   Lafarga M, 2017, RNA BIOL, V14, P712, DOI 10.1080/15476286.2016.1231360
   Lafita-Navarro MC, 2020, PLOS GENET, V16, DOI 10.1371/journal.pgen.1009117
   Lafontaine DLJ, 2015, NAT STRUCT MOL BIOL, V22, P11, DOI 10.1038/nsmb.2939
   Landa I, 2013, J CLIN ENDOCR METAB, V98, pE1562, DOI 10.1210/jc.2013-2383
   Lecompte O, 2002, NUCLEIC ACIDS RES, V30, P5382, DOI 10.1093/nar/gkf693
   Lee B, 1996, P NATL ACAD SCI USA, V93, P11471, DOI 10.1073/pnas.93.21.11471
   Lee JH, 2014, HISTOCHEM CELL BIOL, V141, P137, DOI 10.1007/s00418-013-1166-x
   Letoquarta J, 2014, P NATL ACAD SCI USA, V111, pE5518, DOI 10.1073/pnas.1413089111
   Liao JM, 2014, ONCOGENE, V33, P4916, DOI 10.1038/onc.2013.430
   Licht K, 2019, NUCLEIC ACIDS RES, V47, P3, DOI 10.1093/nar/gky1163
   Lightowlers RN, 2014, FEBS LETT, V588, P2496, DOI 10.1016/j.febslet.2014.05.054
   Lin J, 2008, J CELL SCI, V121, P2169, DOI 10.1242/jcs.024091
   Lofgren LA, 2019, MOL ECOL, V28, P721, DOI 10.1111/mec.14995
   Lou JL, 2021, ENVIRON INT, V153, DOI 10.1016/j.envint.2021.106525
   Lu JH, 2020, FRONT ONCOL, V10, DOI 10.3389/fonc.2020.01105
   Lu QS, 2010, RNA, V16, P529, DOI 10.1261/rna.1893710
   Lu T, 2004, NATURE, V429, P883, DOI 10.1038/nature02661
   LYCKEGAARD EMS, 1989, P NATL ACAD SCI USA, V86, P1944, DOI 10.1073/pnas.86.6.1944
   Ma HH, 2019, NAT CHEM BIOL, V15, P88, DOI 10.1038/s41589-018-0184-3
   Ma XX, 2017, PLOS ONE, V12, DOI 10.1371/journal.pone.0169212
   Maciejowski J, 2017, NAT REV MOL CELL BIO, V18, P175, DOI 10.1038/nrm.2016.171
   Marbaniang CN, 2016, CURR OPIN MICROBIOL, V30, P50, DOI 10.1016/j.mib.2016.01.001
   Marcel V, 2015, MOL CELL ONCOL, V2, DOI 10.4161/23723556.2014.983755
   Martin AN, 2007, CELL RES, V17, P219, DOI 10.1038/sj.cr.7310120
   Meier UT, 2017, RNA BIOL, V14, P693, DOI 10.1080/15476286.2016.1249091
   Min KW, 2018, AGING CELL, V17, DOI 10.1111/acel.12753
   Moghaddam AD, 2015, DALTON T, V44, P3536, DOI 10.1039/c4dt02649g
   Molina-Pinelo S, 2018, ONCOTARGET, V9, P4395, DOI 10.18632/oncotarget.10611
   Monaco P.L., 2018, BIOMOLECULES, V8
   Mondragon A, 2013, ANNU REV BIOPHYS, V42, P537, DOI 10.1146/annurev-biophys-083012-130406
   Morita Y, 2013, NAT COMMUN, V4, DOI 10.1038/ncomms3273
   Motorin Y, 2018, GENES-BASEL, V9, DOI 10.3390/genes9120642
   Nachmani D, 2019, NAT GENET, V51, P1518, DOI 10.1038/s41588-019-0502-z
   Narla A, 2010, BLOOD, V115, P3196, DOI 10.1182/blood-2009-10-178129
   Nassour J, 2019, NATURE, V565, P659, DOI 10.1038/s41586-019-0885-0
   Natchiar SK, 2017, NATURE, V551, P472, DOI 10.1038/nature24482
   Tran NV, 2019, NUCLEIC ACIDS RES, V47, P7719, DOI 10.1093/nar/gkz619
   Noon KR, 1998, J BACTERIOL, V180, P2883, DOI 10.1128/JB.180.11.2883-2888.1998
   O'Sullivan M, 2015, HUM MOL GENET, V24, P1036, DOI 10.1093/hmg/ddu518
   Ohki R, 2001, MOL CELL BIOL, V21, P5753, DOI 10.1128/MCB.21.17.5753-5766.2001
   Olivier M, 2010, CSH PERSPECT BIOL, V2, DOI 10.1101/cshperspect.a001008
   Orsolic I, 2020, ONCOGENE, V39, P3443, DOI 10.1038/s41388-020-1231-6
   Ozturk S, 2015, BIOL REPROD, V92, DOI 10.1095/biolreprod.114.124008
   Percharde M, 2018, CELL, V174, P391, DOI 10.1016/j.cell.2018.05.043
   POLDERMANS B, 1979, J BIOL CHEM, V254, P9090
   Polikanov YS, 2015, NAT STRUCT MOL BIOL, V22, P342, DOI 10.1038/nsmb.2992
   POORT C, 1981, J CELL SCI, V50, P165
   Rainger J, 2012, HUM MOL GENET, V21, P3969, DOI 10.1093/hmg/dds218
   Rattan SIS, 1996, EXP GERONTOL, V31, P33, DOI 10.1016/0531-5565(95)02022-5
   Ridanpaa M, 2001, CELL, V104, P195, DOI 10.1016/S0092-8674(01)00205-7
   Rodwell GEJ, 2004, PLOS BIOL, V2, P2191, DOI 10.1371/journal.pbio.0020427
   Romano G, 2018, FRONT GENET, V9, DOI 10.3389/fgene.2018.00243
   RUSTCHENKO EP, 1993, J BACTERIOL, V175, P7189, DOI 10.1128/JB.175.22.7189-7199.1993
   Ruvinsky I, 2006, TRENDS BIOCHEM SCI, V31, P342, DOI 10.1016/j.tibs.2006.04.003
   Salomon W, 2010, NUCLEIC ACIDS RES, V38, P3771, DOI 10.1093/nar/gkq055
   Santos AL, 2017, OXID MED CELL LONGEV, V2017, DOI 10.1155/2017/5716409
   Sharma S, 2018, SCI REP-UK, V8, DOI 10.1038/s41598-018-30383-z
   Sharma S, 2017, SCI REP-UK, V7, DOI 10.1038/s41598-017-09734-9
   Sharma S, 2015, TRENDS BIOCHEM SCI, V40, P560, DOI 10.1016/j.tibs.2015.07.008
   Shay JW, 2019, NAT REV GENET, V20, P299, DOI 10.1038/s41576-019-0099-1
   Shay JW, 2000, NAT REV MOL CELL BIO, V1, P72, DOI 10.1038/35036093
   Shi Z, 2015, ANNU REV CELL DEV BI, V31, P31, DOI 10.1146/annurev-cellbio-100814-125346
   SIRUMCONNOLLY K, 1995, BIOCHIMIE, V77, P30, DOI 10.1016/0300-9084(96)88101-6
   SIRUMCONNOLLY K, 1993, SCIENCE, V262, P1886, DOI 10.1126/science.8266080
   Sloan KE, 2017, RNA BIOL, V14, P1138, DOI 10.1080/15476286.2016.1259781
   Spenkuch F, 2014, RNA BIOL, V11, P1540, DOI 10.4161/15476286.2014.992278
   Stage DE, 2007, GENOME RES, V17, P1888, DOI 10.1101/gr.6376807
   Stults DM, 2008, GENOME RES, V18, P13, DOI 10.1101/gr.6858507
   Tang H, 2018, NAT COMMUN, V9, DOI 10.1038/s41467-018-04617-7
   Tapia O, 2017, NEUROBIOL DIS, V108, P83, DOI 10.1016/j.nbd.2017.08.004
   Terns MP, 2002, GENE EXPRESSION, V10, P17
   Tomioka M, 2018, SCI REP-UK, V8, DOI 10.1038/s41598-018-19652-z
   Tomlinson RL, 2006, MOL BIOL CELL, V17, P955, DOI 10.1091/mbc.E05-09-0903
   Trainor PA, 2014, BBA-MOL BASIS DIS, V1842, P769, DOI 10.1016/j.bbadis.2013.11.010
   Trinkle-Mulcahy L, 2017, RNA BIOL, V14, P739, DOI 10.1080/15476286.2016.1236169
   Trixl L, 2019, WIRES RNA, V10, DOI 10.1002/wrna.1510
   Tsoi H, 2017, ONCOGENE, V36, P6109, DOI 10.1038/onc.2017.86
   Ugrinova I, 2007, BMC MOL BIOL, V8, DOI 10.1186/1471-2199-8-66
   Van Ly D, 2018, MOL CELL, V71, P510, DOI 10.1016/j.molcel.2018.06.025
   Venteicher AS, 2009, CELL CYCLE, V8, P1329, DOI 10.4161/cc.8.9.8288
   Venteicher AS, 2009, SCIENCE, V323, P644, DOI 10.1126/science.1165357
   Vlachos A, 2017, HEMATOL-AM SOC HEMAT, P716, DOI 10.1182/asheducation-2017.1.716
   von Morgen P, 2018, GENOME MED, V10, DOI 10.1186/s13073-018-0596-4
   Waku T, 2016, J CELL SCI, V129, P2382, DOI 10.1242/jcs.183723
   Walker SC, 2008, CELL, V135, P412, DOI 10.1016/j.cell.2008.10.010
   Wang M, 2019, GENOME RES, V29, P325, DOI 10.1101/gr.241745.118
   Wang M, 2017, PLOS GENET, V13, DOI 10.1371/journal.pgen.1006994
   Xiao S, 2014, PLOS ONE, V9, DOI 10.1371/journal.pone.0109858
   Xue SF, 2012, NAT REV MOL CELL BIO, V13, P355, DOI 10.1038/nrm3359
   Yao B, 2017, NAT COMMUN, V8, DOI 10.1038/s41467-017-01195-y
   Yen PS, 2000, BRIT J CANCER, V82, P514, DOI 10.1054/bjoc.1999.0955
   Yu Y, 2006, MOL CELL BIOL, V26, P3798, DOI 10.1128/MCB.26.10.3798-3809.2006
   Yue YN, 2015, GENE DEV, V29, P1343, DOI 10.1101/gad.262766.115
   Zahn JM, 2006, PLOS GENET, V2, P1058, DOI 10.1371/journal.pgen.0020115
   Zhang Q, 2011, P NATL ACAD SCI USA, V108, P20325, DOI 10.1073/pnas.1100279108
   Zhao BS, 2015, CELL RES, V25, P153, DOI 10.1038/cr.2014.143
   Zhou Y, 2021, CANCER METAB, V9, DOI 10.1186/s40170-021-00250-z
   Zhu YS, 2004, MOL BIOL CELL, V15, P81, DOI 10.1091/mbc.E03-07-0525
   Zlotorynski E, 2019, NAT REV MOL CELL BIO, V20, P133, DOI 10.1038/s41580-019-0105-7
NR 165
TC 0
Z9 0
U1 4
U2 4
PU ACADEMIC PRESS LTD- ELSEVIER SCIENCE LTD
PI LONDON
PA 24-28 OVAL RD, LONDON NW1 7DX, ENGLAND
SN 1044-579X
EI 1096-3650
J9 SEMIN CANCER BIOL
JI Semin. Cancer Biol.
PD NOV
PY 2021
VL 76
BP 292
EP 300
DI 10.1016/j.semcancer.2021.08.012
EA NOV 2021
PG 9
WC Oncology
WE Science Citation Index Expanded (SCI-EXPANDED)
SC Oncology
GA XD3FG
UT WOS:000722595800004
PM 34474152
DA 2022-04-10
ER

PT J
AU Tapia, JC
   Niechi, I
AF Tapia, Julio C.
   Niechi, Ignacio
TI Endothelin-converting enzyme-1 in cancer aggressiveness
SO CANCER LETTERS
LA English
DT Review
DE ECE-1; Phosphorylation; Stability; Malignant progression; Prognosis
ID PROTEIN-KINASE CK2; CELL INVASION; NUCLEAR-LOCALIZATION;
   CARCINOMA-CELLS; EXPRESSION; RECEPTOR; ECE-1; TRAFFICKING;
   PHOSPHORYLATION; APOPTOSIS
AB The endothelin-1 (ET-1) axis contributes to the pathophysiology of several cancers by promoting tumor development and progression. This peptide is activated from its precursor, big ET-1, by endothelin-converting enzyme-1 (ECE-1). Active ET-1 binds to its cognate G-coupled receptor, ETAR, which transduces the signal to the inside of the cell. ET-1 has a short half-life of about 90 s, so its biological effects are completely dependent on its enzymatic activation by ECE-1. Expression of ECE-1 is elevated in several tumors and cancer cell lines. There are four ECE-1 isoforms -ECE-1a, -1b, -1c, and -1d- which vary in terms of their subcellular localization and, in some cases, their effects on cancer-related properties such as proliferation and invasiveness. In this article, we review findings on the role of ECE-1, particularly isoform ECE-1c, in oncogenesis and malignant progression. We also review evidence regarding ECE-1 expression in several types of tumors and cancer cell lines. Recent findings from our laboratory and others allow us to speculate on the mechanism by which ECE-lc promotes cancer aggressiveness. Finally, we evaluate potential post-translational modification of ECE-1c, highlighting phosphorylation by several kinases, as well as evidence pointing to a putative, non-canonical, ET-1-independent mechanism for promoting invasiveness. Taken together, current evidence suggests that ECE-1c contributes to cancer aggressiveness and plays a putative role as a key regulator of cancer progression. Therefore, we propose that this protein is a promising target for prognostic and therapeutic purposes.
C1 [Tapia, Julio C.] Univ Chile, Fac Med, Dept Oncol Basico Clin, Santiago, Chile.
   [Niechi, Ignacio] Univ Austral Chile, Fac Ciencias, Inst Bioquim & Microbiol, Lab Patol Mol, Valdivia, Chile.
RP Tapia, JC (corresponding author), Univ Chile, Fac Med, Dept Oncol Basico Clin, Lab Transformac Celular, Av Independencia 1027, Santiago 8380453, Chile.
EM jtapia@med.uchile.cl
RI Pineda, Julio Tapia/AAW-8949-2020
OI Pineda, Julio Tapia/0000-0003-1678-2708; Niechi,
   Ignacio/0000-0003-1857-8698
FU Fondo Nacional de Desarrollo Cientifico y Tecnologico-ChileComision
   Nacional de Investigacion Cientifica y Tecnologica (CONICYT)CONICYT
   FONDECYT [FONDECYT 1160889]
FX The study was sponsored by the Fondo Nacional de Desarrollo Cientifico y
   Tecnologico-Chile (FONDECYT 1160889).
CR Ahmed SI, 2000, AM J RESP CELL MOL, V22, P422, DOI 10.1165/ajrcmb.22.4.3795
   Arun B, 2001, CANCER INVEST, V19, P779, DOI 10.1081/CNV-100107738
   Aubert JD, 2016, J MED CHEM, V59, P8168, DOI 10.1021/acs.jmedchem.5b01781
   Awano S, 2006, INT J CANCER, V118, P1645, DOI 10.1002/ijc.21525
   Bagnato A, 2008, INT J BIOCHEM CELL B, V40, P1443, DOI 10.1016/j.biocel.2008.01.022
   Barton M, 2008, CAN J PHYSIOL PHARM, V86, P485, DOI 10.1139/Y08-059
   Berger Y, 2005, J MED CHEM, V48, P483, DOI 10.1021/jm040857x
   Cianfrocca R, 2017, CELL DEATH DIFFER, V24, P1811, DOI 10.1038/cdd.2017.121
   Del Bufalo D, 2002, MOL PHARMACOL, V61, P524, DOI 10.1124/mol.61.3.524
   EMOTO N, 1995, J BIOL CHEM, V270, P15262, DOI 10.1074/jbc.270.25.15262
   Funke-Kaiser H, 2003, J HYPERTENS, V21, P2111, DOI 10.1097/00004872-200311000-00021
   Gray GK, 2014, ONCOTARGET, V5, P6484, DOI 10.18632/oncotarget.2248
   Gu HJ, 2008, EUR J CANCER, V44, P1253, DOI 10.1016/j.ejca.2007.09.013
   Hanahan D, 2011, CELL, V144, P646, DOI 10.1016/j.cell.2011.02.013
   Hasdemir B, 2012, MOL ENDOCRINOL, V26, P681, DOI 10.1210/me.2011-1361
   Hasegawa H, 1998, FEBS LETT, V428, P304, DOI 10.1016/S0014-5793(98)00554-7
   Hong Y, 2011, INT J CANCER, V129, P586, DOI 10.1002/ijc.25719
   Hsu Yung-Hsiang, 2003, Kaohsiung Journal of Medical Sciences, V19, P555
   Hwang DW, 2017, PANCREAS, V46, P575, DOI 10.1097/MPA.0000000000000780
   Irani S, 2014, CRIT REV ONCOL HEMAT, V89, P314, DOI 10.1016/j.critrevonc.2013.08.011
   Jafri F, 2003, ARTERIOSCL THROM VAS, V23, P2192, DOI 10.1161/01.ATV.0000099787.21778.55
   Kawanabe Y, 2011, CELL MOL LIFE SCI, V68, P195, DOI 10.1007/s00018-010-0518-0
   Khimji AK, 2010, CELL SIGNAL, V22, P1615, DOI 10.1016/j.cellsig.2010.05.002
   Klijn C, 2015, NAT BIOTECHNOL, V33, P306, DOI 10.1038/nbt.3080
   Kuruppu S, 2012, BIOCHEM BIOPH RES CO, V427, P606, DOI 10.1016/j.bbrc.2012.09.105
   Kuruppu S, 2012, FEBS LETT, V586, P2212, DOI 10.1016/j.febslet.2012.06.020
   Kuruppu S, 2010, BIOCHEM BIOPH RES CO, V398, P173, DOI 10.1016/j.bbrc.2010.06.045
   Lambert LA, 2008, BRIT J CANCER, V99, P1114, DOI 10.1038/sj.bjc.6604631
   Laramas M, 2007, EUR J CANCER, V43, P928, DOI 10.1016/j.ejca.2006.11.021
   Law IKM, 2012, J BIOL CHEM, V287, P15066, DOI 10.1074/jbc.M111.327262
   Liang L, 2007, CANCER INVEST, V25, P427, DOI 10.1080/07357900701512258
   Lin K, 2011, PLOS ONE, V6, DOI 10.1371/journal.pone.0018608
   MacLeod KJ, 2002, J BIOL CHEM, V277, P46355, DOI 10.1074/jbc.M207972200
   Maguire JJ, 2016, LIFE SCI, V159, P30, DOI 10.1016/j.lfs.2016.02.069
   McKenzie GAG, 2014, J ORAL PATHOL MED, V43, P395, DOI 10.1111/jop.12108
   McNeish AJ, 2012, BRIT J PHARMACOL, V167, P1679, DOI 10.1111/j.1476-5381.2012.02129.x
   Muller L, 2003, J BIOL CHEM, V278, P545, DOI 10.1074/jbc.M208949200
   Naidoo V, 2005, CANCER-AM CANCER SOC, V104, P1049, DOI 10.1002/cncr.21277
   Nelson JB, 2005, NEOPLASIA, V7, P631, DOI 10.1593/neo.04787
   Niechi I, 2015, ONCOTARGET, V6, P42749, DOI 10.18632/oncotarget.5722
   O-charoenrat P, 2004, CLIN CANCER RES, V10, P5792, DOI 10.1158/1078-0432.CCR-03-0317
   Pelayo JC, 2011, J PHYSIOL-LONDON, V589, P5213, DOI 10.1113/jphysiol.2011.214452
   Ponce DP, 2011, MOL CELL BIOCHEM, V356, P127, DOI 10.1007/s11010-011-0965-4
   Ponce DP, 2011, J CELL PHYSIOL, V226, P1953, DOI 10.1002/jcp.22527
   Rodriguez DA, 2009, MOL BIOL CELL, V20, P2297, DOI 10.1091/mbc.E08-09-0939
   Rosano L, 2016, J EXP CLIN CANC RES, V35, DOI 10.1186/s13046-016-0401-4
   Rosano L, 2016, AM J PHYSIOL-REG I, V310, pR469, DOI 10.1152/ajpregu.00532.2015
   Ruzzene M, 2010, BBA-PROTEINS PROTEOM, V1804, P499, DOI 10.1016/j.bbapap.2009.07.018
   Schulz H, 2009, J MOL BIOL, V385, P178, DOI 10.1016/j.jmb.2008.10.052
   Shimada K, 1996, BIOCHEM J, V315, P863, DOI 10.1042/bj3150863
   SHIMADA K, 1995, BIOCHEM BIOPH RES CO, V207, P807, DOI 10.1006/bbrc.1995.1258
   Smith AI, 2006, INT J PEPT RES THER, V12, P291, DOI 10.1007/s10989-006-9034-3
   Smollich M, 2007, BREAST CANCER RES TR, V106, P361, DOI 10.1007/s10549-007-9516-9
   Tapia JC, 2006, P NATL ACAD SCI USA, V103, P15079, DOI 10.1073/pnas.0606845103
   Van Beneden R, 2004, CLIN ENDOCRINOL, V60, P146, DOI 10.1111/j.1365-2265.2004.01959.x
   Wang SY, 2011, ANTI-CANCER AGENT ME, V11, P993, DOI 10.2174/187152011797927661
   Whyteside AR, 2010, CAN J PHYSIOL PHARM, V88, P850, DOI 10.1139/Y10-054
   Whyteside AR, 2014, PLOS ONE, V9, DOI 10.1371/journal.pone.0083260
   Wu C. F., 2017, TUMOR BIOL, V39
   XU D, 1994, CELL, V78, P473, DOI 10.1016/0092-8674(94)90425-1
   Xu E. S., 2018, ORAL DIS
   Zhao PS, 2013, J BIOL CHEM, V288, P25689, DOI 10.1074/jbc.M113.496414
   2013, NAT REV CANCER, V13, P637, DOI DOI 10.1038/NRC3546
   2017, EXPER OPIN THER TAR, V21, P925, DOI DOI 10.1080/14728222.2017.1361930
   1997, BIOCH J 3, V328, P871
   BIOCH J 3, V346, P611
   1999, J CELL SCI PT 18, V112, P3115
   2008, CANCER RES, V68, P9265, DOI DOI 10.1158/0008-5472.CAN-08-2093
   2006, GENE, V373, P109, DOI DOI 10.1016/J.GENE.2006.01.024
NR 69
TC 4
Z9 4
U1 0
U2 1
PU ELSEVIER IRELAND LTD
PI CLARE
PA ELSEVIER HOUSE, BROOKVALE PLAZA, EAST PARK SHANNON, CO, CLARE, 00000,
   IRELAND
SN 0304-3835
EI 1872-7980
J9 CANCER LETT
JI Cancer Lett.
PY 2019
VL 452
BP 152
EP 157
DI 10.1016/j.canlet.2019.03.033
PG 6
WC Oncology
WE Science Citation Index Expanded (SCI-EXPANDED)
SC Oncology
GA HW1PF
UT WOS:000466454100015
PM 30926432
OA hybrid
DA 2022-04-10
ER

PT J
AU Khanna, R
   Moutal, A
   Perez-Miller, S
   Chefdeville, A
   Boinon, L
   Patek, M
AF Khanna, Rajesh
   Moutal, Aubin
   Perez-Miller, Samantha
   Chefdeville, Aude
   Boinon, Lisa
   Patek, Marcel
TI Druggability of CRMP2 for Neurodegenerative Diseases
SO ACS CHEMICAL NEUROSCIENCE
LA English
DT Review
DE CRMP2; CBD3 peptide; edonerpic maleate; lanthionine ketimine ester;
   naringenin; lacosamide
ID RESPONSE MEDIATOR PROTEIN-2; GLYCOGEN-SYNTHASE KINASE-3; LANTHIONINE
   KETIMINE; NEUROPATHIC PAIN; post-translational modification; PROVIDES
   NEUROPROTECTION; BOVINE BRAIN; SPINAL-CORD; MOUSE MODEL; ANTINOCICEPTIVE
   EFFICACY
AB Collapsin response mediator proteins (CRMPs) are ubiquitously expressed phosphoproteins that coordinate cytoskeletal formation and regulate cellular division, migration, polarity, and synaptic connection. CRMP2, the most studied of the five family members, is best known for its affinity for tubulin heterodimers and function in regulating the microtubule network. Accumulating evidence has also demonstrated a key role for CRMP2 in trafficking of voltage-and ligand-gated ion channels. These functions are tightly regulated by post-translational modification including phosphorylation and SUMOylation (addition of a small ubiquitinationlike modifier). Over the past decade, it has become increasingly clear that dysregulated post-translational modification of CRMP2 contribute to the pathomechanism of diverse diseases, including cancer, neurodegenerative diseases, chronic pain, and bipolar disorder. Here, we review the discovery, functions, and current putative preclinical and clinical therapeutics targeting CRMP2. These potential therapeutics include CRMP2-based peptides that inhibit protein-protein interaction and small-molecule compounds. Capitalizing on the availability of structural information, we identify druggable pockets on CRMP2 and predict binding modes for five known CRMP2-targeting compounds, setting the stage for optimization and de novo drug discovery targeting this multifunctional protein.
C1 [Khanna, Rajesh; Moutal, Aubin; Perez-Miller, Samantha; Chefdeville, Aude; Boinon, Lisa] Univ Arizona, Coll Med, Dept Pharmacol, Tucson, AZ 85724 USA.
   [Patek, Marcel] BrightRock Path LLC, Tucson, AZ 85704 USA.
   [Khanna, Rajesh] Univ Arizona, Coll Med, Grad Interdisciplinary Program Neurosci, Tucson, AZ 85724 USA.
   [Khanna, Rajesh] Univ Arizona Hlth Sci, Ctr Innovat Brain Sci, Tucson, AZ 85724 USA.
   [Khanna, Rajesh] Regulonix LLC, Tucson, AZ 85718 USA.
RP Khanna, R (corresponding author), Univ Arizona, Coll Med, Dept Pharmacol, Tucson, AZ 85724 USA.; Khanna, R (corresponding author), Univ Arizona, Coll Med, Grad Interdisciplinary Program Neurosci, Tucson, AZ 85724 USA.; Khanna, R (corresponding author), Univ Arizona Hlth Sci, Ctr Innovat Brain Sci, Tucson, AZ 85724 USA.; Khanna, R (corresponding author), Regulonix LLC, Tucson, AZ 85718 USA.
EM rkhanna@arizona.edu
OI Khanna, Rajesh/0000-0002-9066-2969; Perez-Miller,
   Samantha/0000-0002-9034-3693
FU National Institutes of HealthUnited States Department of Health & Human
   ServicesNational Institutes of Health (NIH) - USA [R01NS098772,
   R01DA042852]
FX This work is supported by National Institutes of Health awards (Grants
   R01NS098772 and R01DA042852) to R.K.
CR Abe H, 2018, SCIENCE, V360, P50, DOI 10.1126/science.aao2300
   Amrutkar DV, 2011, NEUROSCIENCE, V172, P510, DOI 10.1016/j.neuroscience.2010.10.032
   Andurkar SV, 1999, BIOORGAN MED CHEM, V7, P2381, DOI 10.1016/S0968-0896(99)00186-8
   Ben Hamida S, 2019, ADDICT BIOL, V24, P908, DOI 10.1111/adb.12653
   Benedict JW, 2009, J NEUROSCI RES, V87, P2157, DOI 10.1002/jnr.22032
   Beyreuther B., 2009, EP Patent, Patent No. 1873527A1
   Beyreuther B., 2009, World Patent, Patent No. 2008000512A2
   Beyreuther B, 2006, EUR J PHARMACOL, V539, P64, DOI 10.1016/j.ejphar.2006.04.009
   Beyreuther BK, 2007, EUR J PHARMACOL, V565, P98, DOI 10.1016/j.ejphar.2007.02.041
   Beyreuther BK, 2007, NEUROPHARMACOLOGY, V52, P1312, DOI 10.1016/j.neuropharm.2007.01.012
   Beyreuther BK, 2007, CNS DRUG REV, V13, P21, DOI 10.1111/j.1527-3458.2007.00001.x
   Bourinet E, 2014, PHYSIOL REV, V94, P81, DOI 10.1152/physrev.00023.2013
   Bretin S, 2005, J COMP NEUROL, V486, P1, DOI 10.1002/cne.20465
   Brittain JM, 2012, FEBS LETT, V586, P3813, DOI 10.1016/j.febslet.2012.09.022
   Brittain JM, 2011, J BIOL CHEM, V286, P37778, DOI 10.1074/jbc.M111.255455
   Brittain JM, 2011, NAT MED, V17, P822, DOI 10.1038/nm.2345
   Brittain JM, 2009, J BIOL CHEM, V284, P31375, DOI 10.1074/jbc.M109.009951
   Brustovetsky T, 2014, J BIOL CHEM, V289, P7470, DOI 10.1074/jbc.M113.518472
   Buchta WC, 2020, MOL NEUROBIOL, V57, P346, DOI 10.1007/s12035-019-01711-9
   Byk T, 1996, J NEUROSCI, V16, P688
   Chang YH, 2020, INT J MOL SCI, V21, DOI 10.3390/ijms21062172
   Charrier E, 2003, MOL NEUROBIOL, V28, P51, DOI 10.1385/MN:28:1:51
   Chew L.A., 2018, NEURONAL SIGNAL, V2, DOI [10.1042/NS20, DOI 10.1042/NS20]
   Chi XX, 2009, J CELL SCI, V122, P4351, DOI 10.1242/jcs.053280
   Cizkova D, 2002, EXP BRAIN RES, V147, P456, DOI 10.1007/s00221-002-1217-3
   Cole AR, 2006, J BIOL CHEM, V281, P16591, DOI 10.1074/jbc.M513344200
   Cole AR, 2004, J BIOL CHEM, V279, P50176, DOI 10.1074/jbc.C400412200
   Dolphin AC, 2016, J PHYSIOL-LONDON, V594, P5369, DOI 10.1113/JP272262
   DUPRE S, 1993, BIOCHEM BIOPH RES CO, V195, P673, DOI 10.1006/bbrc.1993.2098
   Dupree JL, 2015, J NEUROCHEM, V134, P302, DOI 10.1111/jnc.13114
   Dustrude ET, 2016, P NATL ACAD SCI USA, V113, pE8443, DOI 10.1073/pnas.1610531113
   Dustrude ET, 2013, J BIOL CHEM, V288, P24316, DOI 10.1074/jbc.M113.474924
   Dustrude ET, 2017, CHANNELS, V11, P316, DOI 10.1080/19336950.2017.1299838
   Errington AC, 2008, MOL PHARMACOL, V73, P157, DOI 10.1124/mol.107.039867
   Errington AC, 2006, NEUROPHARMACOLOGY, V50, P1016, DOI 10.1016/j.neuropharm.2006.02.002
   Feldman P, 2013, NEUROSCI LETT, V557, P27, DOI 10.1016/j.neulet.2013.06.057
   FONTANA M, 1990, BIOCHEM BIOPH RES CO, V171, P480, DOI 10.1016/0006-291X(90)91418-R
   Francois-Moutal L, 2018, CHANNELS, V12, P219, DOI 10.1080/19336950.2018.1491244
   Francois-Moutal L, 2018, PAIN, V159, P2115, DOI 10.1097/j.pain.0000000000001294
   Francois-Moutal L, 2015, PAIN, V156, P1247, DOI 10.1097/j.pain.0000000000000147
   Fukata Y, 2002, NAT CELL BIOL, V4, P583, DOI 10.1038/ncb825
   GOADSBY PJ, 1990, ANN NEUROL, V28, P183, DOI 10.1002/ana.410280213
   GOSHIMA Y, 1995, NATURE, V376, P509, DOI 10.1038/376509a0
   Grant NJ, 2015, BMC CANCER, V15, DOI 10.1186/s12885-015-1691-1
   Hagenacker T, 2013, EUR J PAIN, V17, P881, DOI 10.1002/j.1532-2149.2012.00260.x
   Hamajima N, 1996, GENE, V180, P157, DOI 10.1016/S0378-1119(96)00445-3
   Hao JX, 2006, EUR J PHARMACOL, V553, P135, DOI 10.1016/j.ejphar.2006.09.040
   Hearn L, 2012, COCHRANE DB SYST REV, DOI 10.1002/14651858.CD009318.pub2
   HEDGECOCK EM, 1985, DEV BIOL, V111, P158, DOI 10.1016/0012-1606(85)90443-9
   Henley JM, 2014, PHYSIOL REV, V94, P1249, DOI 10.1152/physrev.00008.2014
   Hensley K, 2016, J ALZHEIMERS DIS, V53, P1, DOI 10.3233/JAD-160076
   Hensley K, 2013, J NEUROPATH EXP NEUR, V72, P955, DOI 10.1097/NEN.0b013e3182a74372
   Hensley K, 2011, MOL NEUROBIOL, V43, P180, DOI 10.1007/s12035-011-8166-4
   Hensley K, 2010, MOLECULES, V15, P5581, DOI 10.3390/molecules15085581
   Hensley K, 2010, J NEUROSCI, V30, P2979, DOI 10.1523/JNEUROSCI.5247-09.2010
   Hubbard C, 2013, J NEUROSCI RES, V91, P1183, DOI 10.1002/jnr.23239
   Hussein HA, 2015, NUCLEIC ACIDS RES, V43, pW436, DOI 10.1093/nar/gkv462
   Inagaki N, 2001, NAT NEUROSCI, V4, P781, DOI 10.1038/90476
   Ip JPK, 2014, NEUROSCIENTIST, V20, P589, DOI 10.1177/1073858413514278
   Isono T, 2013, NEUROSCI RES, V77, P180, DOI 10.1016/j.neures.2013.08.005
   Ito T, 2000, MECH DEVELOP, V97, P35, DOI 10.1016/S0925-4773(00)00401-9
   Jimenez J, 2017, BIOINFORMATICS, V33, P3036, DOI 10.1093/bioinformatics/btx350
   Ju WN, 2013, CHANNELS, V7, P153, DOI 10.4161/chan.24224
   Khanna R, 2012, FUTUR NEUROL, V7, P749, DOI 10.2217/FNL.12.68
   Kikuchi K, 2003, J BIOL CHEM, V278, P42985, DOI 10.1074/jbc.M302395200
   Kimura T, 2009, BRIT J PHARMACOL, V157, P451, DOI 10.1111/j.1476-5381.2009.00141.x
   Kitamura K, 1999, DNA Res, V6, P291, DOI 10.1093/dnares/6.5.291
   Koehler D, 2018, NEUROCHEM INT, V115, P61, DOI 10.1016/j.neuint.2018.02.002
   Kotaka K, 2017, BIOCHEM BIOPH RES CO, V483, P759, DOI 10.1016/j.bbrc.2016.12.069
   Lawal MF, 2018, CHEM BIODIVERS, V15, DOI 10.1002/cbdv.201800437
   LeTiran A, 2001, BIOORGAN MED CHEM, V9, P2693, DOI 10.1016/S0968-0896(01)00204-8
   Lim NKH, 2014, HUM MOL GENET, V23, P4051, DOI 10.1093/hmg/ddu119
   Liu F, 2017, MOL PSYCHIATR, V22, P89, DOI 10.1038/mp.2016.12
   Majava V, 2008, FEBS J, V275, P4583, DOI 10.1111/j.1742-4658.2008.06601.x
   Martins-de-Souza D, 2015, PROTEOM CLIN APPL, V9, P817, DOI 10.1002/prca.201500004
   MINTURN JE, 1995, J NEUROSCI, V15, P6757
   Morris GM, 2009, J COMPUT CHEM, V30, P2785, DOI 10.1002/jcc.21256
   Moutal A, 2018, MOL PSYCHIATR, V23, P2119, DOI 10.1038/mp.2017.117
   Moutal A, 2019, CHANNELS, V13, P498, DOI 10.1080/19336950.2019.1684608
   Moutal Aubin, 2019, Neurobiol Pain, V5, DOI 10.1016/j.ynpai.2018.07.003
   Moutal A, 2019, MOL NEUROBIOL, V56, P6736, DOI 10.1007/s12035-019-1568-4
   Moutal A, 2018, NEUROSCIENCE, V381, P79, DOI 10.1016/j.neuroscience.2018.04.002
   Moutal A, 2018, MOL NEUROBIOL, V55, P4403, DOI 10.1007/s12035-017-0653-9
   Moutal A, 2018, NEUROSCIENCE, V376, P224, DOI 10.1016/j.neuroscience.2018.02.025
   Moutal A, 2018, BRIT J PHARMACOL, V175, P2244, DOI 10.1111/bph.13737
   Moutal A, 2016, PAIN REP, V1, DOI 10.1097/PR9.0000000000000565
   Moutal A, 2017, PAIN, V158, P2301, DOI 10.1097/j.pain.0000000000001002
   Moutal A, 2017, PAIN, V158, P2203, DOI 10.1097/j.pain.0000000000001026
   Moutal A, 2016, PAIN, V157, P1448, DOI 10.1097/j.pain.0000000000000555
   Moutal A, 2016, MOL NEUROBIOL, V53, P1959, DOI 10.1007/s12035-015-9141-2
   Moutal A, 2015, FRONT CELL NEUROSCI, V8, DOI 10.3389/fncel.2014.00471
   Mu A, 2017, CAN FAM PHYSICIAN, V63, P844
   Myllykoski M, 2017, AMINO ACIDS, V49, P747, DOI 10.1007/s00726-016-2376-z
   Nada SE, 2012, NEUROCHEM INT, V61, P1357, DOI 10.1016/j.neuint.2012.09.013
   Nada SE, 2012, NEUROBIOL DIS, V46, P180, DOI 10.1016/j.nbd.2012.01.006
   Nakamura H, 2016, GENES CELLS, V21, P1059, DOI 10.1111/gtc.12403
   Nishimura T, 2003, NAT CELL BIOL, V5, P819, DOI 10.1038/ncb1039
   Numata-Uematsu Y, 2019, NEUROSCI RES, V139, P63, DOI 10.1016/j.neures.2018.08.016
   Olesen J, 2004, NEW ENGL J MED, V350, P1104, DOI 10.1056/NEJMoa030505
   Park KD, 2010, ORG BIOMOL CHEM, V8, P2803, DOI 10.1039/c000987c
   Patrakitkomjorn S, 2008, J BIOL CHEM, V283, P9399, DOI 10.1074/jbc.M708206200
   Perucca E, 2008, NAT REV DRUG DISCOV, V7, P973, DOI 10.1038/nrd2764
   Petratos S, 2012, BRAIN, V135, P1794, DOI 10.1093/brain/aws100
   Piekarz AD, 2012, MOL PAIN, V8, DOI 10.1186/1744-8069-8-54
   Ponnusamy R, 2014, ACTA CRYSTALLOGR D, V70, P1680, DOI 10.1107/S1399004714006634
   Quach TT, 2015, MOL PSYCHIATR, V20, P1037, DOI 10.1038/mp.2015.77
   Rauck RL, 2007, CLIN J PAIN, V23, P150, DOI 10.1097/01.ajp.0000210957.39621.b2
   Reynolds E, 2006, LANCET NEUROL, V5, P949, DOI 10.1016/S1474-4422(06)70598-1
   Ricard D, 2000, MOL CELL NEUROSCI, V16, P324, DOI 10.1006/mcne.2000.0888
   RICCI G, 1989, BIOCHIM BIOPHYS ACTA, V990, P211, DOI 10.1016/S0304-4165(89)80036-4
   Ripsch MS, 2012, TRANSL NEUROSCI, V3, P1, DOI 10.2478/s13380-012-0002-4
   Rogawski MA, 2015, EPILEPSY RES, V110, P189, DOI 10.1016/j.eplepsyres.2014.11.021
   Sampson DA, 2001, J BIOL CHEM, V276, P21664, DOI 10.1074/jbc.M100006200
   Sarchielli P, 2000, CEPHALALGIA, V20, P907, DOI 10.1046/j.1468-2982.2000.00146.x
   Schwarze SR, 1999, SCIENCE, V285, P1569, DOI 10.1126/science.285.5433.1569
   Shah K, 2017, MOL NEUROBIOL, V54, P2255, DOI 10.1007/s12035-016-9792-7
   Shaibani A, 2009, J PAIN, V10, P818, DOI 10.1016/j.jpain.2009.01.322
   Shimada K, 2014, BREAST CANCER-TOKYO, V21, P715, DOI 10.1007/s12282-013-0447-5
   Stohr T, 2006, EUR J PAIN, V10, P241, DOI 10.1016/j.ejpain.2005.04.002
   Tahimic CGT, 2006, BIOCHEM BIOPH RES CO, V340, P1244, DOI 10.1016/j.bbrc.2005.12.132
   Tobe BTD, 2017, P NATL ACAD SCI USA, V114, pE4462, DOI 10.1073/pnas.1700111114
   Togashi K, 2019, GENES CELLS, V24, P31, DOI 10.1111/gtc.12651
   Trott O, 2010, J COMPUT CHEM, V31, P455, DOI 10.1002/jcc.21334
   Uchida Y, 2005, GENES CELLS, V10, P165, DOI 10.1111/j.1365-2443.2005.00827.x
   Vincent P, 2005, J IMMUNOL, V175, P7650, DOI 10.4049/jimmunol.175.11.7650
   Wang LL, 2019, J MOL NEUROSCI, V69, P391, DOI 10.1007/s12031-019-01368-y
   Wang LH, 1997, J NEUROCHEM, V69, P2261
   Wang YY, 2010, J BIOL CHEM, V285, P25296, DOI 10.1074/jbc.M110.128801
   Wienken CJ, 2010, NAT COMMUN, V1, DOI 10.1038/ncomms1093
   Wilson SM, 2012, NEUROSCIENCE, V210, P451, DOI 10.1016/j.neuroscience.2012.02.038
   Wilson SM, 2015, MOL NEUROBIOL, V51, P599, DOI 10.1007/s12035-014-8775-9
   Wilson SM, 2014, FRONT CELL NEUROSCI, V8, DOI 10.3389/fncel.2014.00196
   Wilson SM, 2014, FRONT CELL NEUROSCI, V8, DOI 10.3389/fncel.2014.00135
   Wolff C, 2012, CNS NEUROSCI THER, V18, P493, DOI 10.1111/j.1755-5949.2012.00313.x
   Xie JY, 2016, PAIN, V157, P2124, DOI 10.1097/j.pain.0000000000000628
   Yang ZY, 2017, FRONT PHARMACOL, V8, DOI 10.3389/fphar.2017.00340
   Yoshida H, 1998, J BIOL CHEM, V273, P9761, DOI 10.1074/jbc.273.16.9761
   Yoshimura T, 2005, CELL, V120, P137, DOI 10.1016/j.cell.2004.11.012
   Yu J, 2019, MOL NEUROBIOL, V56, P5241, DOI 10.1007/s12035-018-1445-6
   Zhang JN, 2017, NEURAL REGEN RES, V12, P692, DOI 10.4103/1673-5374.206631
   Zhang ZQ, 2020, J MOL NEUROSCI, V70, P353, DOI 10.1007/s12031-019-01419-4
   Zheng YY, 2018, NAT COMMUN, V9, DOI 10.1038/s41467-017-02811-7
   Zhou Y, 2019, ACS CHEM NEUROSCI, V10, P4834, DOI 10.1021/acschemneuro.9b00547
   Ziegler D, 2010, DIABETES CARE, V33, P839, DOI 10.2337/dc09-1578
NR 144
TC 6
Z9 6
U1 3
U2 5
PU AMER CHEMICAL SOC
PI WASHINGTON
PA 1155 16TH ST, NW, WASHINGTON, DC 20036 USA
SN 1948-7193
J9 ACS CHEM NEUROSCI
JI ACS Chem. Neurosci.
PD SEP 2
PY 2020
VL 11
IS 17
BP 2492
EP 2505
DI 10.1021/acschemneuro.0c00307
PG 14
WC Biochemistry & Molecular Biology; Chemistry, Medicinal; Neurosciences
WE Science Citation Index Expanded (SCI-EXPANDED)
SC Biochemistry & Molecular Biology; Pharmacology & Pharmacy; Neurosciences
   & Neurology
GA NO1TL
UT WOS:000569269100004
PM 32693579
DA 2022-04-10
ER

PT J
AU Tonoli, H
   Barrett, JC
AF Tonoli, H
   Barrett, JC
TI CD82 metastasis suppressor gene: a potential target for new
   therapeutics?
SO TRENDS IN MOLECULAR MEDICINE
LA English
DT Review
ID CANCER-CELL-LINES; FREQUENT DOWN-REGULATION; nf-kappa b;
   prostate cancer; TETRASPANIN CD82; KAI1 EXPRESSION; PANCREATIC-CANCER;
   KAI1/CD82 GENE; T-LYMPHOCYTES; COLON-CANCER
AB The transmembrane glycoprotein CD82 is a member of the tetraspanin protein family and is a metastasis suppressor implicated in biological processes ranging from fusion, adhesion and migration to apoptosis and cell-morphology alterations. Downregulation of CD82 expression is associated with the advanced stages of many human cancers and correlates with the acquisition of metastatic potential. Recent studies suggest that complex mechanism underlie CD82 loss of function, including altered transcriptional regulation, splice variant production and post-translational protein modifications, and indicate a central role for CD82 in controlling metastasis as a 'molecular facilitator'. The diverse array of functions of CD82, the complexity of the regulation of CD82 and the prospects for targeting CD82 as a therapeutic approach for the treatment of a variety of metastatic cancers are discussed.
C1 Ctr Canc Res, Lab Biosyst & Canc, NCI, Bethesda, MD 20892 USA.
RP Barrett, JC (corresponding author), Ctr Canc Res, Lab Biosyst & Canc, NCI, Bethesda, MD 20892 USA.
EM barrett@mail.nih.gov
FU Intramural NIH HHSUnited States Department of Health & Human
   ServicesNational Institutes of Health (NIH) - USA Funding Source:
   Medline
CR Adachi M, 1996, CANCER RES, V56, P1751
   Adachi M, 1998, J CLIN ONCOL, V16, P1397, DOI 10.1200/JCO.1998.16.4.1397
   Akita H, 2000, CANCER LETT, V153, P79, DOI 10.1016/S0304-3835(00)00352-9
   Baek SH, 2002, CELL, V110, P55, DOI 10.1016/S0092-8674(02)00809-7
   Bass R, 2005, J BIOL CHEM, V280, P14811, DOI 10.1074/jbc.M414189200
   Berger JC, 2004, ANTI-CANCER DRUG, V15, P559, DOI 10.1097/01.cad.0000132233.36512.fa
   Bienstock RJ, 2001, MOL CARCINOGEN, V32, P139, DOI 10.1002/mc.1073
   Bouras T, 1999, J PATHOL, V188, P382, DOI 10.1002/(SICI)1096-9896(199908)188:4<382::AID-PATH365>3.0.CO;2-O
   Charrin S, 2003, EUR J IMMUNOL, V33, P2479, DOI 10.1002/eji.200323884
   Delaguillaumie A, 2004, J CELL SCI, V117, P5269, DOI 10.1242/jcs.01380
   Delaguillaumie A, 2002, J CELL SCI, V115, P433
   DONG JT, 1995, SCIENCE, V268, P884, DOI 10.1126/science.7754374
   Dong JT, 1996, CANCER RES, V56, P4387
   Duriez C, 2000, ONCOGENE, V19, P2461, DOI 10.1038/sj.onc.1203580
   ENGEL P, 1994, LEUKEMIA LYMPHOMA, V13, P61, DOI 10.3109/10428199409052677
   Escola JM, 1998, J BIOL CHEM, V273, P20121, DOI 10.1074/jbc.273.32.20121
   Friess H, 1998, INT J CANCER, V79, P349, DOI 10.1002/(SICI)1097-0215(19980821)79:4<349::AID-IJC7>3.0.CO;2-V
   Friess H, 2001, J CLIN ONCOL, V19, P2422, DOI 10.1200/JCO.2001.19.9.2422
   Gao AC, 2003, PROSTATE, V57, P256, DOI 10.1002/pros.10309
   Guo XZ, 1996, CANCER RES, V56, P4876
   He B, 2005, J BIOL CHEM, V280, P3346, DOI 10.1074/jbc.M406680200
   Huang CI, 1998, AM J PATHOL, V153, P973, DOI 10.1016/S0002-9440(10)65639-8
   Iwata S, 2002, EUR J IMMUNOL, V32, P1328, DOI 10.1002/1521-4141(200205)32:5<1328::AID-IMMU1328>3.0.CO;2-6
   Jackson P, 2005, INT J BIOCHEM CELL B, V37, P530, DOI 10.1016/j.biocel.2004.08.009
   Jackson P, 2002, UROL ONCOL, V7, P99, DOI 10.1016/S1078-1439(01)00175-2
   Jackson P, 2000, CANCER LETT, V157, P169, DOI 10.1016/S0304-3835(00)00483-3
   Jackson P, 2000, BIOCHEM BIOPH RES CO, V278, P499, DOI 10.1006/bbrc.2000.3799
   Jee B, 2003, EXP MOL MED, V35, P30, DOI 10.1038/emm.2003.5
   Joseph J, 2004, ONCOGENE, V23, P6304, DOI 10.1038/sj.onc.1207852
   Kauffman EC, 2003, J UROLOGY, V169, P1122, DOI 10.1097/01.ju.0000051580.89109.4b
   Kim JH, 2005, NATURE, V434, P921, DOI 10.1038/nature03452
   LEBELBINAY S, 1995, J LEUKOCYTE BIOL, V57, P956, DOI 10.1002/jlb.57.6.956
   Lee JH, 2004, CANCER RES, V64, P4235, DOI 10.1158/0008-5472.CAN-04-0275
   Lee JH, 2003, CANCER RES, V63, P7247
   Li J, 2001, J BIOL CHEM, V276, P18579, DOI 10.1074/jbc.M100846200
   Liu FS, 2000, GYNECOL ONCOL, V78, P10, DOI 10.1006/gyno.2000.5801
   Lombardi DP, 1999, CANCER RES, V59, P5724
   Marreiros A, 2005, ONCOGENE, V24, P637, DOI 10.1038/sj.onc.1208216
   Marreiros A, 2003, GENE, V302, P155, DOI 10.1016/S0378-1119(02)01101-0
   Mashimo T, 1998, P NATL ACAD SCI USA, V95, P11307, DOI 10.1073/pnas.95.19.11307
   Mashimo T, 2000, BIOCHEM BIOPH RES CO, V274, P370, DOI 10.1006/bbrc.2000.3139
   Maurer CA, 1999, SURGERY, V126, P869, DOI 10.1016/S0039-6060(99)70028-0
   Miyazaki T, 2000, CANCER-AM CANCER SOC, V89, P955, DOI 10.1002/1097-0142(20000901)89:5<955::AID-CNCR3>3.0.CO;2-Z
   Odintsova E, 2000, CURR BIOL, V10, P1009, DOI 10.1016/S0960-9822(00)00652-7
   Odintsova E, 2003, J CELL SCI, V116, P4557, DOI 10.1242/jcs.00793
   Ono M, 1999, CANCER RES, V59, P2335
   Ono M, 2000, BIOCHEM BIOPH RES CO, V279, P744, DOI 10.1006/bbrc.2000.4030
   Pique C, 2000, VIROLOGY, V276, P455, DOI 10.1006/viro.2000.0538
   Schoenfeld N, 2004, FASEB J, V18, P158, DOI 10.1096/fj.03-0420fje
   Sekita N, 2001, JPN J CANCER RES, V92, P947, DOI 10.1111/j.1349-7006.2001.tb01185.x
   Shevde LA, 2003, CANCER LETT, V198, P1, DOI 10.1016/S0304-3835(03)00304-5
   Shinohara T, 2001, CANCER RES, V61, P673
   Sigala S, 1999, CLIN CANCER RES, V5, P1211
   Song SW, 2005, CANCER RES, V65, P3562, DOI 10.1158/0008-5472.CAN-04-3392
   Su JS, 2004, INT J UROL, V11, P74, DOI 10.1111/j.1442-2042.2004.00752.x
   Tagawa K, 1999, JPN J CANCER RES, V90, P970, DOI 10.1111/j.1349-7006.1999.tb00843.x
   Takaoka A, 1998, ONCOGENE, V16, P1443, DOI 10.1038/sj.onc.1201648
   Takaoka A, 1998, JPN J CANCER RES, V89, P397, DOI 10.1111/j.1349-7006.1998.tb00577.x
   Telese F, 2005, EMBO REP, V6, P77, DOI 10.1038/sj.embor.7400309
   Vogt AB, 2002, IMMUNOL REV, V189, P136, DOI 10.1034/j.1600-065X.2002.18912.x
   White A, 1998, ONCOGENE, V16, P3143, DOI 10.1038/sj.onc.1201852
   Wu DH, 2004, WORLD J GASTROENTERO, V10, P2245
   Wu Q, 2003, CELL TISSUE RES, V314, P237, DOI 10.1007/s00441-003-0781-6
   Yang XH, 2001, CANCER RES, V61, P5284
   Zhang XA, 2003, J BIOL CHEM, V278, P27319, DOI 10.1074/jbc.M303039200
   Zhang XW, 2003, DIAM RELAT MATER, V12, P1, DOI 10.1016/S0925-9635(02)00246-7
   Zhou B, 2004, CANCER RES, V64, P7455, DOI 10.1158/0008-5472.CAN-04-1574
NR 67
TC 73
Z9 74
U1 0
U2 6
PU ELSEVIER SCI LTD
PI OXFORD
PA THE BOULEVARD, LANGFORD LANE, KIDLINGTON, OXFORD OX5 1GB, OXON, ENGLAND
SN 1471-4914
EI 1471-499X
J9 TRENDS MOL MED
JI Trends Mol. Med
PD DEC
PY 2005
VL 11
IS 12
BP 563
EP 570
DI 10.1016/j.molmed.2005.10.002
PG 8
WC Biochemistry & Molecular Biology; Cell Biology; Medicine, Research &
   Experimental
WE Science Citation Index Expanded (SCI-EXPANDED)
SC Biochemistry & Molecular Biology; Cell Biology; Research & Experimental
   Medicine
GA 998LS
UT WOS:000234320800007
PM 16271511
DA 2022-04-10
ER

PT J
AU Wade, JH
   Alsop, AT
   Vertin, NR
   Yang, HW
   Johnson, MD
   Bailey, RC
AF Wade, James H.
   Alsop, Aurora T.
   Vertin, Nicholas R.
   Yang, Hongwei
   Johnson, Mark D.
   Bailey, Ryan C.
TI Rapid, Multiplexed Phosphoprotein Profiling Using Silicon Photonic
   Sensor Arrays
SO ACS CENTRAL SCIENCE
LA English
DT Article
ID CENTRAL-NERVOUS-SYSTEM; RETINOBLASTOMA PROTEIN; signal transduction;
   mechanism; RESISTANCE; ANTIBODY; INHIBITION; CANCER
AB Extracellular signaling is commonly mediated through post-translational protein modifications that propagate messages from membrane-bound receptors to ultimately regulate gene expression. Signaling cascades are ubiquitously intertwined, and a full understanding of function can only be gleaned by observing dynamics across multiple key signaling nodes. Importantly, target within signaling cascades often represent opportunities for therapeutic development or can serve as diagnostic biomarkers. Protein phosphorylation is a particularly important post-translational modification that controls many essential cellular signaling pathway. Not surprisingly, aberrant phosphorylation is found in many human diseases, including cancer, and phosphoprotein-based biomarker signatures hold unrealized promise for disease monitoring. Moreover, phosphoprotein analysis has wide-ranging applications across fundamental chemical biology, as many drug discovery efforts seek to target nodes within kinase signaling pathway. For both fundamental and translational applications, the analysis of phosphoprotein biomarker target is limited by a reliance on labor-intensive and/or technically challenging methods, particularly when considering the simultaneous monitoring of multiplexed panels of phosphoprotein biomarkers. We have developed a technology based upon arrays of silicon photonic microring resonator sensors that fills this void, facilitating the rapid and automated analysis of multiple phosphoprotein levels from both cell lines and primary human tumor samples requiring only minimal sample preparation.
C1 [Wade, James H.; Alsop, Aurora T.; Vertin, Nicholas R.; Bailey, Ryan C.] Univ Illinois, Dept Chem, Urbana, IL 61801 USA.
   [Yang, Hongwei; Johnson, Mark D.] Brigham & Womens Hosp, Dept Neurol Surg, Boston, MA 02115 USA.
   [Yang, Hongwei; Johnson, Mark D.] Harvard Univ, Sch Med, Boston, MA 02115 USA.
RP Bailey, RC (corresponding author), Univ Illinois, Dept Chem, 600 South Mathews Ave, Urbana, IL 61801 USA.
EM baileyrc@illinois.edu
OI Wade, James/0000-0002-9740-1905
FU NCI NIH HHSUnited States Department of Health & Human ServicesNational
   Institutes of Health (NIH) - USANIH National Cancer Institute (NCI) [R33
   CA177462] Funding Source: Medline; NATIONAL CANCER INSTITUTEUnited
   States Department of Health & Human ServicesNational Institutes of
   Health (NIH) - USANIH National Cancer Institute (NCI) [R33CA177462]
   Funding Source: NIH RePORTER
CR Ajioka I, 2007, CELL, V131, P378, DOI 10.1016/j.cell.2007.09.036
   Akbani R, 2014, MOL CELL PROTEOMICS, V13, P1625, DOI 10.1074/mcp.O113.034918
   Anderson GJ, 2011, ANAL CHEM, V83, P1350, DOI 10.1021/ac102671n
   Bailey RC, 2007, J AM CHEM SOC, V129, P1959, DOI 10.1021/ja065930i
   Burkhart DL, 2008, NAT REV CANCER, V8, P671, DOI 10.1038/nrc2399
   BURNETTE WN, 1981, ANAL BIOCHEM, V112, P195, DOI 10.1016/0003-2697(81)90281-5
   Chung M, 2013, ANAL CHEM, V85, P7753, DOI 10.1021/ac401012j
   Corley R. B., 2005, GUIDE METHODS BIOMED, P1
   Diaz LA, 2012, NATURE, V486, P537, DOI 10.1038/nature11219
   Fan R, 2008, NAT BIOTECHNOL, V26, P1373, DOI 10.1038/nbt.1507
   Gomperts BD, 2009, SIGNAL TRANSDUCTION, 2ND EDITION, P243, DOI 10.1016/B978-0-12-369441-6.00009-X
   Hoyer S., 2004, EUR J PHARMACOL, V490, P115
   Hughes AJ, 2014, NAT METHODS, V11, P749, DOI [10.1038/nmeth.2992, 10.1038/NMETH.2992]
   Hughes AJ, 2012, P NATL ACAD SCI USA, V109, P21450, DOI 10.1073/pnas.1207754110
   Iqbal M, 2010, IEEE J SEL TOP QUANT, V16, P654, DOI 10.1109/JSTQE.2009.2032510
   Jin S, 2013, ANAL CHEM, V85, P6073, DOI 10.1021/ac400940x
   Kim JH, 2008, J NEURO-ONCOL, V87, P279, DOI 10.1007/s11060-008-9520-x
   Kim TM, 2011, CANCER RES, V71, P3387, DOI 10.1158/0008-5472.CAN-10-4117
   Kindt JT, 2013, ANAL CHEM, V85, P10653, DOI 10.1021/ac402972d
   Klempner SJ, 2013, CANCER DISCOV, V3, P1345, DOI 10.1158/2159-8290.CD-13-0063
   Krook A, 2000, DIABETES, V49, P284, DOI 10.2337/diabetes.49.2.284
   Luchansky MS, 2011, J AM CHEM SOC, V133, P20500, DOI 10.1021/ja2087618
   Niederst MJ, 2013, SCI SIGNAL, V6, DOI 10.1126/scisignal.2004652
   Pan WY, 2010, ANAL CHEM, V82, P3974, DOI 10.1021/ac1000493
   Pena LA, 2000, CANCER RES, V60, P321
   Pierobon M, 2015, ONCOGENE, V34, P805, DOI 10.1038/onc.2014.16
   Quaranta V, 2013, SCI SIGNAL, V6, DOI 10.1126/scisignal.2004715
   Rajer M., 2005, RADIOL ONCOL, V39, P269
   Rubin SM, 2013, TRENDS BIOCHEM SCI, V38, P12, DOI 10.1016/j.tibs.2012.10.007
   Santana P, 1996, CELL, V86, P189, DOI 10.1016/S0092-8674(00)80091-4
   Schweitzer B, 2002, NAT BIOTECHNOL, V20, P359, DOI 10.1038/nbt0402-359
   Siu A, 2012, ACTA NEUROCHIR, V154, P191, DOI 10.1007/s00701-011-1228-6
   Sliwkowski MX, 2013, SCIENCE, V341, P1192, DOI 10.1126/science.1241145
   Steeg PS, 2003, NAT REV CANCER, V3, P55, DOI 10.1038/nrc967
   Tibes R, 2006, MOL CANCER THER, V5, P2512, DOI 10.1158/1535-7163.MCT-06-0334
   Ullal AV, 2014, SCI TRANSL MED, V6, DOI 10.1126/scitranslmed.3007361
   Vivanco I, 2014, BRIT J CANCER, V111, P2033, DOI 10.1038/bjc.2014.461
   Washburn AL, 2010, ANAL CHEM, V82, P69, DOI 10.1021/ac902451b
   WEINBERG RA, 1995, CELL, V81, P323, DOI 10.1016/0092-8674(95)90385-2
   Wong CS, 2004, MOL INTERV, V4, P273, DOI 10.1124/mi.4.5.7
   Xue M, 2015, J AM CHEM SOC, V137, P4066, DOI 10.1021/jacs.5b00944
   Yen YK, 2014, ANAL CHEM, V86, P5164, DOI 10.1021/ac5010162
   Yu J, 2014, ANNU REV ANAL CHEM, V7, P275, DOI 10.1146/annurev-anchem-071213-020323
   Zhang JM, 2009, NAT REV CANCER, V9, P28, DOI 10.1038/nrc2559
   [No title captured]
NR 45
TC 20
Z9 22
U1 3
U2 14
PU AMER CHEMICAL SOC
PI WASHINGTON
PA 1155 16TH ST, NW, WASHINGTON, DC 20036 USA
SN 2374-7943
EI 2374-7951
J9 ACS CENTRAL SCI
JI ACS Central Sci.
PD OCT 28
PY 2015
VL 1
IS 7
BP 374
EP 382
DI 10.1021/acscentsci.5b00250
PG 9
WC Chemistry, Multidisciplinary
WE Science Citation Index Expanded (SCI-EXPANDED)
SC Chemistry
GA CX8QU
UT WOS:000365969500008
PM 26539563
OA Green Published, gold
DA 2022-04-10
ER

PT J
AU Scoumanne, A
   Harms, KL
   Chen, XB
AF Scoumanne, A
   Harms, KL
   Chen, XB
TI Structural basis for gene activation by p53 family members
SO CANCER BIOLOGY & THERAPY
LA English
DT Review
DE p53; p63; p73; functional domains; post-translational modification;
   protein-protein interaction
ID WILD-TYPE P53; UBIQUITIN-PROTEIN LIGASE; NUCLEAR EXPORT SIGNAL;
   TUMOR-SUPPRESSOR P53; TARGET GENES; DNA-DAMAGE; GROWTH SUPPRESSION;
   transcriptional regulation; CRYSTAL-STRUCTURE; C-TERMINUS
AB The p53 tumor suppressor is a modular transcription factor that determines cellular outcome ( cell cycle arrest and DNA repair vs. apoptosis) in response to stress signals. The two p53 homologues, p63 and p73 play an important role in development but also act as tumor suppressors. The p53 family members are highly homologous in the activation domain ( AD), the DNA-binding domain ( DBD) and the tetramerization domain ( TD) but differ in the C-terminus. Indeed, the p53 C-terminus contains a basic domain ( BD) whereas p63/p73 have a sterile a motif ( SAM) domain and an inhibitory domain ( ID). In addition to the full-length proteins, the p53 family genes produce multiple isoforms truncated at the NH2- and/or C-terminus. Importantly, every functional domain is a determinant in the transactivation of specific target genes by the p53 family members. Distinct post-translational modification and interactions with cofactors further modulate the transcriptional regulation of the p53 family members in response to particular stress signals. Therefore, divergence in the composition of the p53 family proteins is responsible for the diversity of p53 family functions.
C1 Univ Alabama Birmingham, Dept Cell Biol, Birmingham, AL USA.
RP Chen, XB (corresponding author), MCLM 660,1918 Univ Blvd, Birmingham, AL 35294 USA.
EM xchen@uab.edu
CR An W, 2004, CELL, V117, P735, DOI 10.1016/j.cell.2004.05.009
   Avantaggiati ML, 1997, CELL, V89, P1175, DOI 10.1016/S0092-8674(00)80304-9
   Ayed A, 2001, NAT STRUCT BIOL, V8, P756, DOI 10.1038/nsb0901-756
   Barlev NA, 2001, MOL CELL, V8, P1243, DOI 10.1016/S1097-2765(01)00414-2
   Bergamaschi D, 2004, MOL CELL BIOL, V24, P1341, DOI 10.1128/MCB.24.3.1341-1350.2004
   Bode AM, 2004, NAT REV CANCER, V4, P793, DOI 10.1038/nrc1455
   Bourdon JC, 2005, GENE DEV, V19, P2122, DOI 10.1101/gad.1339905
   Bruins W, 2004, MOL CELL BIOL, V24, P8884, DOI 10.1128/mcb.24.20.8884-8894.2004
   Buschmann T, 2001, MOL CELL BIOL, V21, P2743, DOI 10.1128/MCB.21.8.2743-2754.2001
   Candau R, 1997, ONCOGENE, V15, P807, DOI 10.1038/sj.onc.1201244
   Celli J, 1999, CELL, V99, P143, DOI 10.1016/S0092-8674(00)81646-3
   Chen DL, 2005, CELL, V121, P1071, DOI 10.1016/j.cell.2005.03.037
   CHEN JD, 1995, MOL MED, V1, P142, DOI 10.1007/BF03401562
   Chen XB, 1996, GENE DEV, V10, P2438, DOI 10.1101/gad.10.19.2438
   Chen XB, 2001, ONCOGENE, V20, P769, DOI 10.1038/sj.onc.1204149
   CHO YJ, 1994, SCIENCE, V265, P346, DOI 10.1126/science.8023157
   Contente A, 2002, NAT GENET, V30, P315, DOI 10.1038/ng836
   Courtois S, 2002, ONCOGENE, V21, P6722, DOI 10.1038/sj.onc.1205874
   De Laurenzi V, 1999, CELL DEATH DIFFER, V6, P389, DOI 10.1038/sj.cdd.4400521
   Derbyshire DJ, 2002, EMBO J, V21, P3863, DOI 10.1093/emboj/cdf383
   Dohn M, 2001, ONCOGENE, V20, P3193, DOI 10.1038/sj.onc.1204427
   DONEHOWER LA, 1992, NATURE, V356, P215, DOI 10.1038/356215a0
   Dornan D, 2004, CANCER RES, V64, P7226, DOI 10.1158/0008-5472.CAN-04-2601
   Dumont P, 2003, NAT GENET, V33, P357, DOI 10.1038/ng1093
   El-Deiry WS, 1998, SEMIN CANCER BIOL, V8, P345, DOI 10.1006/scbi.1998.0097
   ELDEIRY WS, 1992, NAT GENET, V1, P45, DOI 10.1038/ng0492-45
   Flores ER, 2005, CANCER CELL, V7, P363, DOI 10.1016/j.ccr.2005.02.019
   Ghioni P, 2002, MOL CELL BIOL, V22, P8659, DOI 10.1128/MCB.22.24.8659-8668.2002
   Gong JG, 1999, NATURE, V399, P806
   Gottifredi V, 2001, SCIENCE, V292, P1851, DOI 10.1126/science.1062238
   Harms K, 2004, CELL MOL LIFE SCI, V61, P822, DOI 10.1007/s00018-003-3304-4
   Harms KL, 2005, MOL CELL BIOL, V25, P2014, DOI 10.1128/MCB.25.5.2014-2030.2005
   Honda R, 1997, FEBS LETT, V420, P25, DOI 10.1016/S0014-5793(97)01480-4
   Inoue T, 2002, J BIOL CHEM, V277, P15053, DOI 10.1074/jbc.M200248200
   Irwin MS, 2001, CELL GROWTH DIFFER, V12, P337
   Ito A, 2002, EMBO J, V21, P6236, DOI 10.1093/emboj/cdf616
   JEFFREY PD, 1995, SCIENCE, V267, P1498, DOI 10.1126/science.7878469
   Johnson TM, 2005, NAT GENET, V37, P145, DOI 10.1038/ng1498
   Kaeser MD, 2004, ONCOGENE, V23, P4007, DOI 10.1038/sj.onc.1207536
   Kaghad M, 1997, CELL, V90, P809, DOI 10.1016/S0092-8674(00)80540-1
   Kong XT, 2001, J BIOL CHEM, V276, P32990, DOI 10.1074/jbc.M103681200
   Krummel KA, 2005, P NATL ACAD SCI USA, V102, P10188, DOI 10.1073/pnas.0503068102
   Leng RP, 2003, CELL, V112, P779, DOI 10.1016/S0092-8674(03)00193-4
   Liang SH, 1999, J BIOL CHEM, V274, P32699, DOI 10.1074/jbc.274.46.32699
   Liu G, 2005, J BIOL CHEM, V280, P20111, DOI 10.1074/jbc.M413889200
   Liu G, 2004, MOL CELL BIOL, V24, P487, DOI 10.1128/MCB.24.2.487-501.2004
   Lu XB, 2005, GENE DEV, V19, P1162, DOI 10.1101/gad.1291305
   MacPartlin M, 2005, J BIOL CHEM, V280, P30604, DOI 10.1074/jbc.M503352200
   Maier B, 2004, GENE DEV, V18, P306, DOI 10.1101/gad.1162404
   MALKIN D, 1990, SCIENCE, V250, P1233, DOI 10.1126/science.1978757
   Mantovani F, 2004, MOL CELL, V14, P625, DOI 10.1016/j.molcel.2004.05.007
   Mayo LD, 2005, J BIOL CHEM, V280, P25953, DOI 10.1074/jbc.M503026200
   McGrath JA, 2001, HUM MOL GENET, V10, P221, DOI 10.1093/hmg/10.3.221
   McKinney K, 2004, MOL CELL, V16, P413, DOI 10.1016/j.molcel.2004.09.032
   Mills AA, 1999, NATURE, V398, P708, DOI 10.1038/19531
   Murphy M, 1999, GENE DEV, V13, P2490, DOI 10.1101/gad.13.19.2490
   Nicholls CD, 2002, J BIOL CHEM, V277, P12937, DOI 10.1074/jbc.M108815200
   Nozell S, 2003, ONCOGENE, V22, P4333, DOI 10.1038/sj.onc.1206470
   O'Keefe K, 2003, MOL CELL BIOL, V23, P6396, DOI 10.1128/MCB.23.18.6396-6405.2003
   Oda K, 2000, CELL, V102, P849, DOI 10.1016/S0092-8674(00)00073-8
   Okorokov AL, 1997, EMBO J, V16, P6008, DOI 10.1093/emboj/16.19.6008
   Osada M, 2005, MOL CELL BIOL, V25, P6077, DOI 10.1128/MCB.25.14.6077-6089.2005
   Ozaki T, 1999, CANCER RES, V59, P5902
   Qian H, 2002, ONCOGENE, V21, P7901, DOI 10.1038/sj.onc.1205974
   Rohaly G, 2005, CELL, V122, P21, DOI 10.1016/j.cell.2005.04.032
   Rossi M, 2005, EMBO J, V24, P836, DOI 10.1038/sj.emboj.7600444
   Schmale H, 1997, ONCOGENE, V15, P1363, DOI 10.1038/sj.onc.1201500
   Schultz J, 1997, PROTEIN SCI, V6, P249
   Serber Z, 2002, MOL CELL BIOL, V22, P8601, DOI 10.1128/MCB.22.24.8601-8611.2002
   Stommel JM, 1999, EMBO J, V18, P1660, DOI 10.1093/emboj/18.6.1660
   Thomas M, 1999, MOL CELL BIOL, V19, P1092
   Ueda Y, 1999, ONCOGENE, V18, P4993, DOI 10.1038/sj.onc.1202817
   Vaziri H, 2001, CELL, V107, P149, DOI 10.1016/S0092-8674(01)00527-X
   Walker KK, 1996, P NATL ACAD SCI USA, V93, P15335, DOI 10.1073/pnas.93.26.15335
   Willis A, 2004, ONCOGENE, V23, P2330, DOI 10.1038/sj.onc.1207396
   Willis AC, 2003, ONCOGENE, V22, P5481, DOI 10.1038/sj.onc.1206505
   Yang A, 1999, NATURE, V398, P714, DOI 10.1038/19539
   Zaika AI, 2002, J EXP MED, V196, P765, DOI 10.1084/jem.20020179
   Zeng XY, 2000, MOL CELL BIOL, V20, P1299, DOI 10.1128/MCB.20.4.1299-1310.2000
   Zhang YP, 2001, SCIENCE, V292, P1910, DOI 10.1126/science.1058637
   Zhu JH, 1998, J BIOL CHEM, V273, P13030, DOI 10.1074/jbc.273.21.13030
   Zhu JH, 1999, ONCOGENE, V18, P2149, DOI 10.1038/sj.onc.1202533
NR 82
TC 44
Z9 44
U1 2
U2 8
PU TAYLOR & FRANCIS INC
PI PHILADELPHIA
PA 530 WALNUT STREET, STE 850, PHILADELPHIA, PA 19106 USA
SN 1538-4047
EI 1555-8576
J9 CANCER BIOL THER
JI Cancer Biol. Ther.
PD NOV
PY 2005
VL 4
IS 11
BP 1178
EP 1185
DI 10.4161/cbt.4.11.2254
PG 8
WC Oncology
WE Science Citation Index Expanded (SCI-EXPANDED)
SC Oncology
GA 022GS
UT WOS:000236044100009
PM 16294021
OA Bronze
DA 2022-04-10
ER

PT J
AU Yang, X
   Yu, QX
   Xu, H
   Zhou, JF
AF Yang, Xin
   Yu, Qiuxia
   Xu, Hao
   Zhou, Jianfeng
TI Upregulation of CD22 by Chidamide promotes CAR T cells functionality
SO SCIENTIFIC REPORTS
LA English
DT Article
ID CHIMERIC ANTIGEN RECEPTOR; TUMOR-ANTIGEN; B-ALL; CHILDHOOD; EFFICACY;
   LYMPHOMA
AB Treatment failure or relapse due to tumor escape caused by reduction in target antigen expression has become a challenge in the field of CART therapy. Target antigen density is closely related to the effectiveness of CART therapy, and reduced or lost target antigen expression limits the efficacy of CART therapy and hinders the durability of CAR T cells. Epigenetic drugs can regulate histones for molecular modifications to regulate the transcriptional, translational and post-translational modification processes of target agents, and we demonstrated for the first time the role in regulating CD22 expression and its effect on the efficacy of CD22 CART. In this paper, we found that Chidamide promoted the expression of CD22 on the surface of B-cell tumor cells in vitro and in vivo, and enhanced the function of CD22 CART. As for mechanism, we demonstrated that Chidamide did not affect CD22 mRNA transcription, but significantly increased the expression of total CD22 protein, indicating that Chidamide may upregulate cell surface CD22 expression by affecting the distribution of CD22 protein. In summary, our results suggest that Chidamide may enhance the efficacy of CD22 CART by inhibiting histone deacetylases to regulate post-transcriptional modifications that affect protein distribution to increase the expression of CD22 on the cell surface.
C1 [Yang, Xin; Yu, Qiuxia; Xu, Hao; Zhou, Jianfeng] Huazhong Univ Sci & Technol, Tongji Med Coll, Tongji Hosp, Dept Hematol, 1095 Jie Fang Ave, Wuhan 430030, Hubei, Peoples R China.
RP Xu, H (corresponding author), Huazhong Univ Sci & Technol, Tongji Med Coll, Tongji Hosp, Dept Hematol, 1095 Jie Fang Ave, Wuhan 430030, Hubei, Peoples R China.
EM zyxuhao@163.com
FU Key Program of National Natural Science Funds (NNSF) of ChinaNational
   Natural Science Foundation of China (NSFC) [81830008, 81630006]
FX This work was supported by the Key Program of National Natural Science
   Funds (NNSF) of China (J Zhou; 81830008 and 81630006).
CR Brentjens RJ, 2013, SCI TRANSL MED, V5, DOI 10.1126/scitranslmed.3005930
   Brudno JN, 2018, NAT REV CLIN ONCOL, V15, P31, DOI 10.1038/nrclinonc.2017.128
   Chmielewski M, 2011, GENE THER, V18, P62, DOI 10.1038/gt.2010.127
   Clark EA, 2018, FRONT IMMUNOL, V9, DOI 10.3389/fimmu.2018.02235
   Davila ML, 2014, SCI TRANSL MED, V6, DOI 10.1126/scitranslmed.3008226
   Fry TJ, 2018, NAT MED, V24, P20, DOI 10.1038/nm.4441
   Frys S, 2015, BRIT J HAEMATOL, V169, P506, DOI 10.1111/bjh.13318
   Gardner R, 2016, BLOOD, V127, P2406, DOI 10.1182/blood-2015-08-665547
   Guan XW, 2020, CELL DEATH DIS, V11, DOI 10.1038/s41419-019-2210-0
   Haso W, 2013, BLOOD, V121, P1165, DOI 10.1182/blood-2012-06-438002
   Hegde M, 2016, J CLIN INVEST, V126, P3036, DOI 10.1172/JCI83416
   James ST, 2008, J IMMUNOL, V180, P7028, DOI 10.4049/jimmunol.180.10.7028
   Lee DW, 2015, LANCET, V385, P517, DOI 10.1016/S0140-6736(14)61403-3
   Li SJ, 2019, ONCOtarget THER, V12, P5627, DOI 10.2147/OTT.S198567
   Maude SL, 2018, NEW ENGL J MED, V378, P439, DOI 10.1056/NEJMoa1709866
   Maude SL, 2014, NEW ENGL J MED, V371, P1507, DOI 10.1056/NEJMoa1407222
   McLellan AD, 2009, CRIT REV IMMUNOL, V29, P203, DOI 10.1615/CritRevImmunol.v29.i3.20
   O'Reilly MK, 2011, J IMMUNOL, V186, P1554, DOI 10.4049/jimmunol.1003005
   Pan J, 2019, LEUKEMIA, V33, P2854, DOI 10.1038/s41375-019-0488-7
   Pui CH, 2015, J CLIN ONCOL, V33, P2938, DOI 10.1200/JCO.2014.59.1636
   Ramakrishna S, 2019, CLIN CANCER RES, V25, P5329, DOI 10.1158/1078-0432.CCR-18-3784
   Shah NN, 2015, PEDIATR BLOOD CANCER, V62, P964, DOI 10.1002/pbc.25410
   SHAN DM, 1995, J IMMUNOL, V154, P4466
   Smith MA, 2014, CANCER-AM CANCER SOC, V120, P2497, DOI 10.1002/cncr.28748
   Tateno H, 2007, MOL CELL BIOL, V27, P5699, DOI 10.1128/MCB.00383-07
   Walker AJ, 2017, MOL THER, V25, P2189, DOI 10.1016/j.ymthe.2017.06.008
   Watanabe K, 2015, J IMMUNOL, V194, P911, DOI 10.4049/jimmunol.1402346
   Yoshida T, 2016, CLIN TRANSL IMMUNOL, V5, DOI 10.1038/cti.2016.73
NR 28
TC 0
Z9 0
U1 6
U2 6
PU NATURE PORTFOLIO
PI BERLIN
PA HEIDELBERGER PLATZ 3, BERLIN, 14197, GERMANY
SN 2045-2322
J9 SCI REP-UK
JI Sci Rep
PD OCT 19
PY 2021
VL 11
IS 1
AR 20637
DI 10.1038/s41598-021-00227-4
PG 9
WC Multidisciplinary Sciences
WE Science Citation Index Expanded (SCI-EXPANDED)
SC Science & Technology - Other Topics
GA WJ4XR
UT WOS:000709050100051
PM 34667217
OA Green Submitted, Green Published, gold
DA 2022-04-10
ER

PT J
AU Uen, YH
   Liao, CC
   Lin, JC
   Pan, YH
   Liu, YC
   Chen, YC
   Chen, WJ
   Tai, CC
   Lee, KW
   Liu, YR
   Lin, HT
   Lin, CY
AF Uen, Yih-Huei
   Liao, Chen-Chung
   Lin, Jung-Chun
   Pan, Yi-Hsuan
   Liu, Yi-Chung
   Chen, You-Chia
   Chen, Wei-Jung
   Tai, Chih-Chun
   Lee, Kuan-Wei
   Liu, Yun-Ru
   Lin, Hung-Tse
   Lin, Ching-Yu
TI Analysis of differentially expressed novel post-translational
   modifications of plasma apolipoprotein E in Taiwanese females with
   breast cancer
SO JOURNAL OF PROTEOMICS
LA English
DT Article
DE Breast cancer; Plasma; Apolipoprotein E; Post-translational
   modification; Label-free relative quantification; Extracted ion
   chromatogram
ID PROTEIN CARBOXYL METHYLTRANSFERASE; CYSTEINE-ARGININE INTERCHANGE;
   RECEPTOR-BINDING DOMAIN; N-TERMINAL DOMAIN; mass spectrometry;
   ALZHEIMER-DISEASE; EPSILON-4 ALLELE; E GENOTYPES; APOE; RISK
AB APOE epsilon 2 or epsilon 4 alleles being used as indicators of breast cancer risk are controversial in Taiwanese females. We provide a concept for relative comparisons of post-translational modification (PTMs) of plasma apolipoprotein E (ApoE) between normal controls and breast cancer patients to investigate the association of ApoE with breast cancer risk. APOE polymorphisms (ApoE isoforms) were not assessed in this study. The relative modification ratio (%) of 15 targeted and 21 modified peptides were evaluated by 1D SDS-PAGE, in-gel digestion, and label-free nano-LC/MS to compare normal controls with breast cancer patients. Plasma levels of the ApoE protein did not significantly differ between normal controls and breast cancer patients. Eleven sites with novel PTMs were identified from 7 pairs of differentially expressed targeted and modified peptides according to the relative modification ratio including methylation at the E3 (up arrow 1.45-fold), E7 (up arrow 1.45-fold), E11 (up arrow 1.19-fold), E77 (up arrow 2.02-fold), E87 (up arrow 2.02-fold), and Q98 (up arrow 1.62-fold) residues; dimethylation at the Q187 (up arrow 1.44-fold) residue; dihydroxylation at the R92 (up arrow 1.25-fold), K95 (up arrow 1.25-fold), and R103 (up arrow 1.25-fold) residues; and glycosylation at the S129 (up arrow 1.14-fold) residue. The clustered methylation and dihydroxylation of plasma ApoE proteins may play a role in breast cancer. (C) 2015 Elsevier B.V. All rights reserved.
C1 [Uen, Yih-Huei] Chi Mei Hosp Chiali, Superintendents Off, Tainan 722, Taiwan.
   [Uen, Yih-Huei] Chi Mei Med Ctr, Dept Surg, Div Gen Surg, Tainan 710, Taiwan.
   [Uen, Yih-Huei] Chi Mei Med Ctr, Dept Med Res, Tainan 710, Taiwan.
   [Liao, Chen-Chung] Natl Yang Ming Univ, Prote Res Ctr, Taipei 112, Taiwan.
   [Lin, Jung-Chun; Lee, Kuan-Wei; Lin, Hung-Tse; Lin, Ching-Yu] Taipei Med Univ, Coll Med Sci & Technol, Sch Med Lab Sci & Biotechnol, Taipei 11031, Taiwan.
   [Pan, Yi-Hsuan] E China Normal Univ, Lab Mol Ecol & Evolut, Inst Estuarine & Coastal Res, Shanghai 200062, Peoples R China.
   [Liu, Yi-Chung] Natl Hlth Res Inst, Natl Inst Canc Res, Miaoli 35053, Miaoli County, Taiwan.
   [Chen, You-Chia; Lin, Ching-Yu] Taipei Med Univ, Coll Med Sci & Technol, PhD Program Canc Biol & Drug Discovery, Taipei 11031, Taiwan.
   [Chen, You-Chia; Lin, Ching-Yu] Acad Sinica, Taipei 11031, Taiwan.
   [Chen, Wei-Jung] Natl Ilan Univ, Dept Biotechnol & Anim Sci, Ilan 26047, Taiwan.
   [Tai, Chih-Chun] Taipei Med Univ, Shuang Ho Hosp, Dept Lab Med, New Taipei City 23561, Taiwan.
   [Liu, Yun-Ru] Taipei Med Univ, Joint Biobank, Off Human Res, Taipei 11031, Taiwan.
RP Lin, CY (corresponding author), Taipei Med Univ, Coll Med Sci & Technol, Sch Med Lab Sci & Biotechnol, Taipei 11031, Taiwan.
EM cylin@tmu.edu.tw
RI Pan, Yi-Hsuan/ABG-6271-2020; Chen, Wei-Jung Chen/B-4910-2012
OI Pan, Yi-Hsuan/0000-0001-5156-9887; Lin, Ching-Yu/0000-0001-8269-797X
FU Foundation of Chi Mei Medical Center in Taiwan [100CM-TMU-10]
FX This study was supported by a grant (100CM-TMU-10) from the Foundation
   of Chi Mei Medical Center in Taiwan. We appreciate structural
   bioinformatics services provided by the TBI Core Facility
   (http://www.tbi.org.tw) and TMU Joint Biobank in Taiwan.
CR Abrams AJ, 2011, BIOCHEMISTRY-US, V50, P3405, DOI 10.1021/bi200266v
   Ahles TA, 2014, PSYCHO-ONCOLOGY, V23, P1382, DOI 10.1002/pon.3545
   Aleshkov SB, 1999, BIOCHEMISTRY-US, V38, P8918, DOI 10.1021/bi982002q
   Ali K, 2005, CIRC RES, V97, P922, DOI 10.1161/01.RES.0000187467.67684.43
   Bechinger B, 1997, J MEMBRANE BIOL, V156, P197, DOI 10.1007/s002329900201
   Bektasoglu B, 2006, BIOCHEM BIOPH RES CO, V345, P1194, DOI 10.1016/j.bbrc.2006.05.038
   Bettencourt C, 2011, ARCH NEUROL-CHICAGO, V68, P1580, DOI 10.1001/archneurol.2011.636
   Biggar KK, 2015, NAT REV MOL CELL BIO, V16, P5, DOI 10.1038/nrm3915
   Biterge B, 2014, SCI REP-UK, V4, DOI 10.1038/srep06674
   CARDIN AD, 1986, BIOCHEM BIOPH RES CO, V134, P783, DOI 10.1016/S0006-291X(86)80489-2
   Chang NW, 2009, CLIN CHIM ACTA, V401, P144, DOI 10.1016/j.cca.2008.12.005
   Chang NW, 2005, BREAST CANCER RES TR, V90, P257, DOI 10.1007/s10549-004-4656-7
   Chang SJ, 2006, BREAST CANCER RES TR, V98, P109, DOI 10.1007/s10549-005-9137-0
   Chen JL, 2011, P NATL ACAD SCI USA, V108, P14813, DOI 10.1073/pnas.1106420108
   Chen YC, 2005, CANCER RES, V65, P331
   Chen Y, 2009, P NATL ACAD SCI USA, V106, P761, DOI 10.1073/pnas.0811739106
   Chou CY, 2006, J BIOL CHEM, V281, P13333, DOI 10.1074/jbc.M511077200
   Choy N, 2003, J MOL BIOL, V334, P527, DOI 10.1016/j.jmb.2003.09.059
   Clarke SG, 2013, TRENDS BIOCHEM SCI, V38, P243, DOI 10.1016/j.tibs.2013.02.004
   Cox J, 2011, ANNU REV BIOCHEM, V80, P273, DOI 10.1146/annurev-biochem-061308-093216
   De Feo E, 2010, CANCER EPIDEM BIOMAR, V19, P2839, DOI 10.1158/1055-9965.EPI-10-0624
   Djordjevic S, 1998, NAT STRUCT BIOL, V5, P446, DOI 10.1038/nsb0698-446
   DONG LM, 1994, J BIOL CHEM, V269, P22358
   Dong LM, 1996, J BIOL CHEM, V271, P19053, DOI 10.1074/jbc.271.32.19053
   Figaro S, 2008, FEBS LETT, V582, P2352, DOI 10.1016/j.febslet.2008.05.045
   Frieden C, 2012, P NATL ACAD SCI USA, V109, P8913, DOI 10.1073/pnas.1207022109
   Geisel J, 2002, CLIN CHEM LAB MED, V40, P475, DOI 10.1515/CCLM.2002.082
   Genin E, 2011, MOL PSYCHIATR, V16, P903, DOI 10.1038/mp.2011.52
   Guttman M, 2010, J MOL BIOL, V398, P306, DOI 10.1016/j.jmb.2010.03.022
   Halim A, 2013, J PROTEOME RES, V12, P573, DOI 10.1021/pr300963h
   Hatters DM, 2006, TRENDS BIOCHEM SCI, V31, P445, DOI 10.1016/j.tibs.2006.06.008
   Hauser PS, 2011, PROG LIPID RES, V50, P62, DOI 10.1016/j.plipres.2010.09.001
   Higgs RE, 2005, J PROTEOME RES, V4, P1442, DOI 10.1021/pr050109b
   Holman Jerry D, 2013, Methods Mol Biol, V1002, P167, DOI 10.1007/978-1-62703-360-2_14
   Hsieh YH, 2011, J BIOMED SCI, V18, DOI 10.1186/1423-0127-18-4
   Huang B, 2009, J PROTEOME RES, V8, P4835, DOI 10.1021/pr9005662
   Huang RYC, 2011, BIOCHEMISTRY-US, V50, P9273, DOI 10.1021/bi2010027
   Huang WY, 2004, ARCH NEUROL-CHICAGO, V61, P1930, DOI 10.1001/archneur.61.12.1930
   Huang XM, 2004, NEUROLOGY, V62, P2198, DOI 10.1212/01.WNL.0000130159.28215.6A
   Huang ZH, 2004, J BIOL CHEM, V279, P29195, DOI 10.1074/jbc.M402631200
   HUSSAIN MM, 1988, J LIPID RES, V29, P915
   Jaros JAJ, 2012, J PROTEOMICS, V76, P43, DOI 10.1016/j.jprot.2012.05.027
   JOHNSON BA, 1985, J BIOL CHEM, V260, P913
   Karihtala P, 2006, EUR J CANCER, V42, P2653, DOI 10.1016/j.ejca.2006.05.037
   Karve Tejaswita M, 2011, J Amino Acids, V2011, P207691, DOI 10.4061/2011/207691
   LAEMMLI UK, 1970, NATURE, V227, P680, DOI 10.1038/227680a0
   Laskowski RA, 2011, J CHEM INF MODEL, V51, P2778, DOI 10.1021/ci200227u
   Lee S, 2013, J PROTEOME RES, V12, P1007, DOI 10.1021/pr300667e
   Lee Y, 2010, MOL CELL PROTEOMICS, V9, P1968, DOI 10.1074/mcp.M900430-MCP200
   Lehrer S, 1998, BRIT J CANCER, V78, P1398, DOI 10.1038/bjc.1998.695
   Liao CC, 2013, J AGR FOOD CHEM, V61, P12450, DOI 10.1021/jf404113k
   Lin HP, 2003, CLIN CHIM ACTA, V330, P173, DOI 10.1016/S0009-8981(03)00050-0
   Liu P, 2010, MOL CELL BIOL, V30, P4245, DOI 10.1128/MCB.00218-10
   Lund-Katz S, 2000, J BIOL CHEM, V275, P34459, DOI 10.1074/jbc.M005265200
   LUNDKATZ S, 1993, J BIOL CHEM, V268, P23008
   Mahley RW, 2009, J LIPID RES, V50, pS183, DOI 10.1194/jlr.R800069-JLR200
   MAHLEY RW, 1988, SCIENCE, V240, P622, DOI 10.1126/science.3283935
   Ministry of Health and Welfare, 2004, CANC REG ANN REP
   Moore RJ, 2004, ONCOLOGY-BASEL, V66, P79, DOI 10.1159/000077433
   Morrow JA, 2000, BIOCHEMISTRY-US, V39, P11657, DOI 10.1021/bi000099m
   Morrow JA, 2000, J BIOL CHEM, V275, P2576, DOI 10.1074/jbc.275.4.2576
   Moysich KB, 2000, MOL CARCINOGEN, V27, P2, DOI 10.1002/(SICI)1098-2744(200001)27:1<2::AID-MC2>3.0.CO;2-W
   NATHAN BP, 1994, SCIENCE, V264, P850, DOI 10.1126/science.8171342
   Ng SS, 2009, CELL MOL LIFE SCI, V66, P407, DOI 10.1007/s00018-008-8303-z
   Nguyen D, 2010, BIOCHEMISTRY-US, V49, P10881, DOI 10.1021/bi1017655
   Nguyen D, 2009, BIOCHEMISTRY-US, V48, P3025, DOI 10.1021/bi9000694
   Nilsson J, 2009, NAT METHODS, V6, P809, DOI [10.1038/NMETH.1392, 10.1038/nmeth.1392]
   Opstal-van Winden AWJ, 2011, BMC CANCER, V11, DOI 10.1186/1471-2407-11-381
   OSBAHR AJ, 1980, BIOMATERIALS, V1, P100, DOI 10.1016/0142-9612(80)90007-1
   Perry JJP, 2015, CELL REP, V10, P1288, DOI 10.1016/j.celrep.2015.01.054
   Pertovaara M, 2004, RHEUMATOLOGY, V43, P1484, DOI 10.1093/rheumatology/keh383
   Pham T, 2005, BIOCHEMISTRY-US, V44, P7577, DOI 10.1021/bi0472696
   Qian WJ, 2005, J PROTEOME RES, V4, P53, DOI 10.1021/pr0498638
   Raftery M, 2005, BIOCHEMISTRY-US, V44, P7346, DOI 10.1021/bi0504052
   Rajkumar R, 2010, RAPID COMMUN MASS SP, V24, P3248, DOI 10.1002/rcm.4766
   Ren XF, 2011, ENVIRON HEALTH PERSP, V119, P771, DOI 10.1289/ehp.1002733
   Ruan Q, 2011, ANAL CHEM, V83, P8937, DOI 10.1021/ac201540t
   RYHANEN L, 1975, BIOCHIM BIOPHYS ACTA, V397, P50
   Saadat M, 2012, CANCER RES TREAT, V44, P121, DOI 10.4143/crt.2012.44.2.121
   Sahr T, 2010, PLANT CELL PHYSIOL, V51, P2092, DOI 10.1093/pcp/pcq171
   Schubert HL, 2003, TRENDS BIOCHEM SCI, V28, P329, DOI 10.1016/S0968-0004(03)00090-2
   Schubert HL, 2003, BIOCHEMISTRY-US, V42, P5592, DOI 10.1021/bi034026p
   Seo J, 2004, J BIOCHEM MOL BIOL, V37, P35
   Seripa D, 2011, REJUV RES, V14, P491, DOI 10.1089/rej.2011.1169
   Seyfang A, 1997, J BIOL CHEM, V272, P24210, DOI 10.1074/jbc.272.39.24210
   Shuvaev VV, 1999, BBA-MOL BASIS DIS, V1454, P296, DOI 10.1016/S0925-4439(99)00047-2
   Sihlbom C, 2009, GLYCOBIOLOGY, V19, P375, DOI 10.1093/glycob/cwn144
   Sivashanmugam A, 2009, J BIOL CHEM, V284, P14657, DOI 10.1074/jbc.M901012200
   Song YQ, 2004, ANN INTERN MED, V141, P137, DOI 10.7326/0003-4819-141-2-200407200-00013
   Souza DRS, 2009, BRAZ J MED BIOL RES, V42, P397, DOI 10.1590/S0100-879X2009000500001
   Sprung R, 2008, J PROTEOME RES, V7, P1001, DOI [10.1021/pr0705338, 10.1021/pr8005155]
   Strahl BD, 2000, NATURE, V403, P41, DOI 10.1038/47412
   Taylor SW, 2000, J BIOL CHEM, V275, P38417, DOI 10.1074/jbc.M006762200
   Tessarz P, 2014, NATURE, V505, P564, DOI 10.1038/nature12819
   Tirona MT, 2010, CANCER INVEST, V28, P743, DOI 10.3109/07357907.2010.494321
   Tokura T, 2011, J ATHEROSCLER THROMB, V18, P536, DOI 10.5551/jat.8102
   van Beers JJBC, 2013, ARTHRITIS RHEUM-US, V65, P69, DOI 10.1002/art.37720
   Walsh CT, 2005, ANGEW CHEM INT EDIT, V44, P7342, DOI 10.1002/anie.200501023
   Wang CG, 2012, J CELL PHYSIOL, V227, P668, DOI 10.1002/jcp.22774
   WARDELL MR, 1991, J LIPID RES, V32, P521
   Wasinger V. C., 2013, INT J PROTEOMICS, DOI [10.1155/2013/180605, DOI 10.1155/2013/180605]
   Weers PMM, 2001, EUR J BIOCHEM, V268, P3728, DOI 10.1046/j.1432-1327.2001.02282.x
   WEISGRABER KH, 1982, J BIOL CHEM, V257, P2518
   WEISGRABER KH, 1986, J BIOL CHEM, V261, P2068
   WEISGRABER KH, 1990, J LIPID RES, V31, P1503
   WESTERLUND JA, 1993, J BIOL CHEM, V268, P15745
   WETTERAU JR, 1988, J BIOL CHEM, V263, P6240
   Wildsmith KR, 2009, ANAL BIOCHEM, V395, P116, DOI 10.1016/j.ab.2009.07.049
   WILSON C, 1991, SCIENCE, V252, P1817, DOI 10.1126/science.2063194
   Wu CT, 2012, J INVEST MED, V60, P1209, DOI 10.2310/JIM.0b013e31826be86a
   Yamauchi M, 2012, ESSAYS BIOCHEM, V52, P113, DOI [10.1042/BSE0520113, 10.1042/bse0520113]
   Youlden DR, 2012, CANCER EPIDEMIOL, V36, P237, DOI 10.1016/j.canep.2012.02.007
   Zaiou M, 2000, J LIPID RES, V41, P1087
   Zannis VI, 2004, CURR OPIN LIPIDOL, V15, P151, DOI 10.1097/00041433-200404000-00008
   Zhang GL, 2011, J PROTEOME RES, V10, P305, DOI 10.1021/pr1006203
   Zhang L, 2012, NATURE, V481, P204, DOI 10.1038/nature10690
   Zhang YH, 2007, BIOCHEMISTRY-US, V46, P10722, DOI 10.1021/bi700672v
   Zhu YJ, 2010, BIOCHEM J, V428, P47, DOI 10.1042/BJ20100016
NR 118
TC 13
Z9 13
U1 0
U2 17
PU ELSEVIER
PI AMSTERDAM
PA RADARWEG 29, 1043 NX AMSTERDAM, NETHERLANDS
SN 1874-3919
EI 1876-7737
J9 J PROTEOMICS
JI J. Proteomics
PD AUG 3
PY 2015
VL 126
BP 252
EP 262
DI 10.1016/j.jprot.2015.05.038
PG 11
WC Biochemical Research Methods
WE Science Citation Index Expanded (SCI-EXPANDED)
SC Biochemistry & Molecular Biology
GA CP4WZ
UT WOS:000359884600023
PM 26079612
DA 2022-04-10
ER

PT J
AU Doll, F
   Steimbach, RR
   Zumbusch, A
AF Doll, Franziska
   Steimbach, Raphael R.
   Zumbusch, Andreas
TI Direct Imaging of Protein-Specific Methylation in Mammalian Cells
SO CHEMBIOCHEM
LA English
DT Article
DE fluorescence; FRET; methylation; proteins; protein modifications
ID FOXO transcription factor; HISTONE METHYLATION; ARGININE METHYLATION;
   ADOMET ANALOG; VISUALIZATION; MARK
AB Abundant post-translational modification through methylation alters the function, stability, and/or localization of a protein. Malfunctions in post-translational modification are associated with severe diseases. To unravel protein methylation sites and their biological functions, chemical methylation reporters have been developed. However, until now, their usage was limited to cell lysates. Herein, we present the first generally applicable approach for imaging methylation of individual proteins in human cells, which is based on a combination of chemical reporter strategies, bioorthogonal ligation reactions, and FRET detected by means of fluorescence lifetime imaging microscopy. Through this approach, methylation of histone 4 and the non-histone proteins tumor suppressor p53, kinase Akt1, and transcription factor Foxo1 in two human cell lines has been successfully imaged. To further demonstrate its potential, the localization-dependent methylation state of Foxo1 in the cellular context has been visualized.
C1 [Doll, Franziska; Steimbach, Raphael R.; Zumbusch, Andreas] Univ Konstanz, Dept Chem, Univ Str 10, D-78457 Constance, Germany.
   [Doll, Franziska; Zumbusch, Andreas] Konstanz Res Sch Chem Biol, Univ Str 10, D-78457 Constance, Germany.
RP Zumbusch, A (corresponding author), Univ Konstanz, Dept Chem, Univ Str 10, D-78457 Constance, Germany.; Zumbusch, A (corresponding author), Konstanz Res Sch Chem Biol, Univ Str 10, D-78457 Constance, Germany.
EM andreas.zumbusch@uni-konstanz.de
OI Steimbach, Raphael/0000-0002-5509-3959
FU Deutsche ForschungsgemeinschaftGerman Research Foundation (DFG) [SFB
   969]; Konstanz Research School Chemical Biology; Zukunftskolleg Konstanz
FX This work was supported by the Deutsche Forschungsgemeinschaft (SFB
   969), the Konstanz Research School Chemical Biology, and the
   Zukunftskolleg Konstanz. We thank Arthur Fischbach and Aswin Mangerich
   (University of Konstanz, Germany) for the p53-EGFP plasmid; Julian
   Downward (University College London, UK) for the EGFP-Akt1 plasmid;
   Jurek Dobrucki (Jagiellonian University Krakow, Poland) for EGFP-H2B,
   H3-EGFP, and H4-EGFP plasmids; Tim Mitchison and Jennifer Tirnauer
   (Harvard Medical School, USA) for the EB1-EGFP plasmid; Domenico Accili
   (Columbia University, USA) for the Foxo1-EGFP plasmid; Lois Greene
   (National Heart, Lung, and Blood Institute, USA) for the EGFP-Hsp70
   plasmid; Harm Kampinga (University of Groningen, The Netherlands) for
   the EGFP-HSPA8 plasmid; Nico Dantuma (Karolinska Institute, Sweden) for
   the VCP-EGFP plasmid; and Michael Kastan (Duke University, USA) for the
   EGFP-Nucleolin plasmid. We are indebted to Thomas U. Mayer (University
   of Konstanz) for helpful discussions.
CR BARTEL RL, 1984, MOL PHARMACOL, V25, P418
   Bartova E, 2010, J HISTOCHEM CYTOCHEM, V58, P391, DOI 10.1369/jhc.2009.955435
   Bothwell IR, 2012, J AM CHEM SOC, V134, P14905, DOI 10.1021/ja304782r
   Cao XJ, 2013, EPIGENETICS-US, V8, P477, DOI 10.4161/epi.24547
   Chen C, 2006, MED BIOL ENG COMPUT, V44, P5, DOI 10.1007/s11517-005-0020-2
   Chuh KN, 2016, CELL CHEM BIOL, V23, P86, DOI 10.1016/j.chembiol.2015.11.006
   Doll F., 2016, ANGEW CHEM, V128, P2303
   Doll F, 2018, METHOD ENZYMOL, V598, P283, DOI 10.1016/bs.mie.2017.06.015
   Doll F, 2016, ANGEW CHEM INT EDIT, V55, P2262, DOI 10.1002/anie.201503183
   Frescas D, 2005, J BIOL CHEM, V280, P20589, DOI 10.1074/jbc.M412357200
   Gao XX, 2014, J AM CHEM SOC, V136, P4544, DOI 10.1021/ja410068g
   Greer EL, 2012, NAT REV GENET, V13, P343, DOI 10.1038/nrg3173
   Hageman J, 2009, CELL STRESS CHAPERON, V14, P1, DOI 10.1007/s12192-008-0060-2
   Hartstock K., 2018, ANGEW CHEM, V130, P6451
   Hartstock K, 2018, ANGEW CHEM INT EDIT, V57, P6342, DOI 10.1002/anie.201800188
   Huber TD, 2016, CURR OPIN BIOTECH, V42, P189, DOI 10.1016/j.copbio.2016.07.005
   Kimura H, 2015, HISTOCHEM CELL BIOL, V144, P101, DOI 10.1007/s00418-015-1344-0
   Koley D, 2010, P NATL ACAD SCI USA, V107, P16783, DOI 10.1073/pnas.1011614107
   Lin CW, 2004, J AM CHEM SOC, V126, P5982, DOI 10.1021/ja038854h
   Luo MK, 2012, ACS CHEM BIOL, V7, P443, DOI 10.1021/cb200519y
   Magde D, 2002, PHOTOCHEM PHOTOBIOL, V75, P327, DOI 10.1562/0031-8655(2002)075<0327:FQYATR>2.0.CO;2
   Martin M., 2013, THESIS
   Morris MC, 2001, NAT BIOTECHNOL, V19, P1173, DOI 10.1038/nbt1201-1173
   Paik WK, 2007, TRENDS BIOCHEM SCI, V32, P146, DOI 10.1016/j.tibs.2007.01.006
   Park J, 2005, P NATL ACAD SCI USA, V102, P8114, DOI 10.1073/pnas.0503141102
   ROBINS MJ, 1991, CAN J CHEM, V69, P1468, DOI 10.1139/v91-217
   Rouhanifard SH, 2013, CHEM SOC REV, V42, P4284, DOI 10.1039/c2cs35416k
   Schmitter T, 2004, J EXP MED, V199, P35, DOI 10.1084/jem.20030204
   Sekar TV, 2015, ANAL CHEM, V87, P892, DOI 10.1021/ac502629r
   Sekar TV, 2015, ACS CHEM BIOL, V10, P165, DOI 10.1021/cb5008037
   Sharei A, 2013, JOVE-J VIS EXP, DOI 10.3791/50980
   Shimazu T, 2014, PLOS ONE, V9, DOI 10.1371/journal.pone.0105394
   Sinha R, 2010, MOL CELL BIOL, V30, P2762, DOI 10.1128/MCB.01270-09
   Sohtome Y, 2018, CHEM REC, V18, P1660, DOI 10.1002/tcr.201800118
   Suhling K, 2005, PHOTOCH PHOTOBIO SCI, V4, P13, DOI 10.1039/b412924p
   Sun YS, 2011, NAT PROTOC, V6, P1324, DOI 10.1038/nprot.2011.364
   Tomkuviene M, 2012, NUCLEIC ACIDS RES, V40, P6765, DOI 10.1093/nar/gks381
   Tresse E, 2010, AUTOPHAGY, V6, P217, DOI 10.4161/auto.6.2.11014
   Tsusaka T, 2018, EPIGENET CHROMATIN, V11, DOI 10.1186/s13072-018-0231-z
   Tzivion G, 2011, BBA-MOL CELL RES, V1813, P1938, DOI 10.1016/j.bbamcr.2011.06.002
   van Munster EB, 2004, CYTOM PART A, V58A, P185, DOI 10.1002/cyto.a.20013
   Wallrodt S., 2016, ANGEW CHEM, V128, P7790
   Wallrodt S, 2016, ANGEW CHEM INT EDIT, V55, P7660, DOI 10.1002/anie.201600464
   Walsh C. T., 2005, ANGEW CHEM, V117, P7508
   Walsh CT, 2005, ANGEW CHEM INT EDIT, V44, P7342, DOI 10.1002/anie.200501023
   Wang R, 2013, J AM CHEM SOC, V135, P1048, DOI 10.1021/ja309412s
   Watton SJ, 1999, CURR BIOL, V9, P433, DOI 10.1016/S0960-9822(99)80192-4
   Wei H, 2014, CELL CYCLE, V13, P32, DOI 10.4161/cc.27353
   Werf P. V. D., 1977, J BIOL CHEM, V252, P2793
   Willnow S, 2012, CHEMBIOCHEM, V13, P1167, DOI 10.1002/cbic.201100781
   Yamagata K, 2008, MOL CELL, V32, P221, DOI 10.1016/j.molcel.2008.09.013
   Yang XD, 2009, EPIGENETICS-US, V4, P429, DOI 10.4161/epi.4.7.9787
   Yoshioka Y, 2016, ONCOTARGET, V7, P75023, DOI 10.18632/oncotarget.11898
   Zeng XC, 2004, J CELL SCI, V117, P4991, DOI 10.1242/jcs.01373
   Zhang J, 2016, ACS CHEM BIOL, V11, P583, DOI 10.1021/acschembio.5b00812
   Zhang L, 2012, NATURE, V481, P204, DOI 10.1038/nature10690
   Zhang Y, 2008, BIOESSAYS, V30, P606, DOI 10.1002/bies.20759
   Zhang YX, 2016, CHEM COMMUN, V52, P6689, DOI 10.1039/c6cc02386j
NR 58
TC 2
Z9 2
U1 3
U2 22
PU WILEY-V C H VERLAG GMBH
PI WEINHEIM
PA POSTFACH 101161, 69451 WEINHEIM, GERMANY
SN 1439-4227
EI 1439-7633
J9 CHEMBIOCHEM
JI ChemBioChem
PD MAY 15
PY 2019
VL 20
IS 10
BP 1315
EP 1325
DI 10.1002/cbic.201800787
PG 11
WC Biochemistry & Molecular Biology; Chemistry, Medicinal
WE Science Citation Index Expanded (SCI-EXPANDED)
SC Biochemistry & Molecular Biology; Pharmacology & Pharmacy
GA IC9PR
UT WOS:000471316400015
PM 30644160
DA 2022-04-10
ER

PT J
AU Abdelkarim, H
   Banerjee, A
   Grudzien, P
   Leschinsky, N
   Abushaer, M
   Gaponenko, V
AF Abdelkarim, Hazem
   Banerjee, Avik
   Grudzien, Patrick
   Leschinsky, Nicholas
   Abushaer, Mahmoud
   Gaponenko, Vadim
TI The Hypervariable Region of K-Ras4B Governs Molecular Recognition and
   Function
SO INTERNATIONAL JOURNAL OF MOLECULAR SCIENCES
LA English
DT Review
DE K-Ras4B; GTPases; hypervariable region; post-translational modification;
   autoinhibition; membrane binding motifs; protein-protein interaction
ID PROTEIN METHYL ESTERASE; SMALL GTPASE K-RAS4B; K-RAS; MEMBRANE
   ASSOCIATION; INTRINSIC DISORDER; post-translational modification;
   ONCOGENIC ACTIVITY; POLYBASIC DOMAIN; H-RAS; BINDING
AB The flexible C-terminal hypervariable region distinguishes K-Ras4B, an important proto-oncogenic GTPase, from other Ras GTPases. This unique lysine-rich portion of the protein harbors sites for post-translational modification, including cysteine prenylation, carboxymethylation, phosphorylation, and likely many others. The functions of the hypervariable region are diverse, ranging from anchoring K-Ras4B at the plasma membrane to sampling potentially auto-inhibitory binding sites in its GTPase domain and participating in isoform-specific protein-protein interaction and signaling. Despite much research, there are still many questions about the hypervariable region of K-Ras4B. For example, mechanistic details of its interaction with plasma membrane lipids and with the GTPase domain require further clarification. The roles of the hypervariable region in K-Ras4B-specific protein-protein interaction and signaling are incompletely defined. It is also unclear why post-translational modification frequently found in protein polylysine domains, such as acetylation, glycation, and carbamoylation, have not been observed in K-Ras4B. Expanding knowledge of the hypervariable region will likely drive the development of novel highly-efficient and selective inhibitors of K-Ras4B that are urgently needed by cancer patients.
C1 [Abdelkarim, Hazem; Grudzien, Patrick; Leschinsky, Nicholas; Abushaer, Mahmoud; Gaponenko, Vadim] UIC, Coll Med, Dept Biochem & Mol Genet, Chicago, IL 60607 USA.
   [Banerjee, Avik] UIC, Dept Chem, Chicago, IL 60612 USA.
RP Gaponenko, V (corresponding author), UIC, Coll Med, Dept Biochem & Mol Genet, Chicago, IL 60607 USA.
EM habdel3@uic.edu; abaner7@uic.edu; pgrudz2@uic.edu; nlesch3@uic.edu;
   mabush4@uic.edu; vadimg@uic.edu
OI Banerjee, Avik/0000-0002-0668-5480
FU American Cancer Society Postdoctoral FellowshipAmerican Cancer Society
   [PF-18-196-01-DMC]; Horizon award under the Congressionally Directed
   Medical Research Program (CDMPRP), Department of Defense (DoD)
   [W81XWH-38817-10509]; National Institutes of Health (NIH)-National
   Cancer Institute (NCI)United States Department of Health & Human
   ServicesNational Institutes of Health (NIH) - USANIH National Cancer
   Institute (NCI) [R01CA188427]; NATIONAL CANCER INSTITUTEUnited States
   Department of Health & Human ServicesNational Institutes of Health (NIH)
   - USANIH National Cancer Institute (NCI) [R01CA188427] Funding Source:
   NIH RePORTER
FX This work has been funded by the American Cancer Society Postdoctoral
   Fellowship (PF-18-196-01-DMC) to H.A., the Horizon award under the
   Congressionally Directed Medical Research Program (CDMPRP), Department
   of Defense (DoD) (W81XWH-38817-10509) to A.B., and the National
   Institutes of Health (NIH)-National Cancer Institute (NCI) R01CA188427
   grant to V.G.
CR Abraham SJ, 2009, BIOCHEMISTRY-US, V48, P7575, DOI 10.1021/bi900769j
   Adhikari H, 2018, NAT COMMUN, V9, DOI 10.1038/s41467-018-05692-6
   Agamasu C, 2019, BIOPHYS J, V116, P1049, DOI 10.1016/j.bpj.2019.02.004
   Agell N, 2002, CELL SIGNAL, V14, P649, DOI 10.1016/S0898-6568(02)00007-4
   Aguilar BJ, 2014, EUR J MED CHEM, V81, P323, DOI 10.1016/j.ejmech.2014.05.018
   Ahearn I, 2018, CSH PERSPECT MED, V8, DOI 10.1101/cshperspect.a031484
   Ahearn IM, 2012, NAT REV MOL CELL BIO, V13, P39, DOI 10.1038/nrm3255
   Alvarez-Moya B, 2010, ONCOGENE, V29, P5911, DOI 10.1038/onc.2010.298
   Alvarez-Moya Blanca, 2011, Small GTPases, V2, P99
   Ambrogio C, 2018, CELL, V172, P857, DOI 10.1016/j.cell.2017.12.020
   Amissah F, 2014, AM J CANCER RES, V4, P116
   Amissah F, 2013, BIOMED RES INT, V2013, DOI 10.1155/2013/416534
   Ansari NA, 2014, CELL BIOCHEM BIOPHYS, V70, P857, DOI 10.1007/s12013-014-9991-7
   Arozarena Imanol, 2011, Genes Cancer, V2, P182, DOI 10.1177/1947601911409213
   Bandaru P, 2019, CSH PERSPECT MED, V9, DOI 10.1101/cshperspect.a031534
   Banerjee A, 2016, CURR OPIN STRUC BIOL, V36, P10, DOI 10.1016/j.sbi.2015.11.010
   Barcelo C, 2014, CANCER RES, V74, P1190, DOI 10.1158/0008-5472.CAN-13-1750
   Barcelo C, 2013, J CELL SCI, V126, P4553, DOI 10.1242/jcs.123737
   Bigenzahn JW, 2018, SCIENCE, V362, P1171, DOI 10.1126/science.aap8210
   Bivona TG, 2006, MOL CELL, V21, P481, DOI 10.1016/j.molcel.2006.01.012
   CADWALLADER KA, 1994, MOL CELL BIOL, V14, P4722, DOI 10.1128/MCB.14.7.4722
   Chavan TS, 2015, BIOPHYS J, V109, P2602, DOI 10.1016/j.bpj.2015.09.034
   Chen Z, 2000, J BIOL CHEM, V275, P41251, DOI 10.1074/jbc.M006687200
   Cho KJ, 2016, MOL CELL BIOL, V36, P3086, DOI 10.1128/MCB.00365-16
   Colon-Bolea P, 2014, BIOESSAYS, V36, P1162, DOI 10.1002/bies.201400120
   Cox AD, 2015, CLIN CANCER RES, V21, P1819, DOI 10.1158/1078-0432.CCR-14-3214
   Darling AL, 2018, FRONT GENET, V9, DOI 10.3389/fgene.2018.00158
   Dharmaiah S, 2016, P NATL ACAD SCI USA, V113, pE6766, DOI 10.1073/pnas.1615316113
   Diver MM, 2018, NATURE, V553, P526, DOI 10.1038/nature25439
   Donninger H, 2007, J CELL SCI, V120, P3163, DOI 10.1242/jcs.010389
   Dunker A Keith, 2002, ScientificWorldJournal, V2, P49, DOI 10.1100/tsw.2002.25
   Dunker AK, 2002, BIOCHEMISTRY-US, V41, P6573, DOI 10.1021/bi012159+
   Duverna R, 2010, CURR CANCER DRUG TAR, V10, P634, DOI 10.2174/156800910791859443
   Eckfeld K, 2004, CANCER RES, V64, P8688, DOI 10.1158/0008-5472.CAN-04-2065
   Elad-Sfadia G, 2004, J BIOL CHEM, V279, P34922, DOI 10.1074/jbc.M312697200
   Fivaz M, 2005, J CELL BIOL, V170, P429, DOI 10.1083/jcb.200409157
   Garrido E, 2018, PLOS COMPUT BIOL, V14, DOI 10.1371/journal.pcbi.1006552
   HANCOCK JF, 1990, CELL, V63, P133, DOI 10.1016/0092-8674(90)90294-O
   HANCOCK JF, 1989, CELL, V57, P1167, DOI 10.1016/0092-8674(89)90054-8
   Heo WD, 2006, SCIENCE, V314, P1458, DOI 10.1126/science.1134389
   Hobbs GA, 2016, J CELL SCI, V129, P1287, DOI 10.1242/jcs.182873
   Hunter JC, 2015, MOL CANCER RES, V13, P1325, DOI 10.1158/1541-7786.MCR-15-0203
   Inder Kerry L, 2010, Commun Integr Biol, V3, P188
   JACKSON JH, 1994, P NATL ACAD SCI USA, V91, P12730, DOI 10.1073/pnas.91.26.12730
   Jang H, 2019, STRUCTURE, V27, P1647, DOI 10.1016/j.str.2019.08.009
   Jang H, 2016, FASEB J, V30, P1643, DOI 10.1096/fj.15-279091
   Jang H, 2015, J BIOL CHEM, V290, P9465, DOI 10.1074/jbc.M114.620724
   Janosi L, 2012, P NATL ACAD SCI USA, V109, P8097, DOI 10.1073/pnas.1200773109
   KAPLAN JB, 1991, CANCER COMMUN, V3, P383, DOI 10.3727/095535491820873704
   Kessler D, 2019, P NATL ACAD SCI USA, V116, P15823, DOI 10.1073/pnas.1904529116
   Keul ND, 2018, NATURE, V563, P584, DOI 10.1038/s41586-018-0699-5
   Kollar P, 2014, PHARM BIOL, V52, P237, DOI 10.3109/13880209.2013.804100
   Konstantinopoulos PA, 2007, NAT REV DRUG DISCOV, V6, P540, DOI 10.1038/nrd2221
   Lakshman B, 2019, J BIOL CHEM, V294, P2193, DOI 10.1074/jbc.RA118.005669
   Lamango Nazarius S, 2009, Open Enzym Inhib J, V2, P12
   Lanouette S, 2014, MOL SYST BIOL, V10, DOI 10.1002/msb.134974
   LEA MA, 1986, INT J PEPT PROT RES, V27, P251
   Li WQ, 2000, GENE DEV, V14, P895
   Li ZL, 2017, STRUCTURE, V25, P679, DOI 10.1016/j.str.2017.02.007
   Long SB, 2000, STRUCTURE, V8, P209, DOI 10.1016/S0969-2126(00)00096-4
   Lopez-Alcala C, 2008, J BIOL CHEM, V283, P10621, DOI 10.1074/jbc.M706238200
   Lu SY, 2016, CHEM SOC REV, V45, P4929, DOI 10.1039/c5cs00911a
   Lu SY, 2015, J BIOL CHEM, V290, P28887, DOI 10.1074/jbc.M115.664755
   Matsunaga H, 2014, BIOCHEM BIOPH RES CO, V444, P360, DOI 10.1016/j.bbrc.2014.01.041
   Mattiroli F, 2014, NAT STRUCT MOL BIOL, V21, P308, DOI 10.1038/nsmb.2792
   Mazhab-Jafari MT, 2015, P NATL ACAD SCI USA, V112, P6625, DOI 10.1073/pnas.1419895112
   Muratcioglu S, 2015, STRUCTURE, V23, P1325, DOI 10.1016/j.str.2015.04.019
   Nancy V, 2002, J BIOL CHEM, V277, P15076, DOI 10.1074/jbc.M109983200
   Nkembo AT, 2019, CURR CANCER DRUG TAR, V19, P838, DOI 10.2174/1568009619666190325144636
   Nkembo AT, 2016, AM J CANCER RES, V6, P2532
   Novotny CJ, 2017, ACS CHEM BIOL, V12, P1956, DOI 10.1021/acschembio.7b00374
   Ntai I, 2018, P NATL ACAD SCI USA, V115, P4140, DOI 10.1073/pnas.1716122115
   Ntantie E, 2017, ONCOTARGET, V8, P31739, DOI 10.18632/oncotarget.15956
   Nussinov R, 2018, CANCER RES, V78, P593, DOI 10.1158/0008-5472.CAN-17-2727
   Nussinov R, 2017, TRENDS CANCER, V3, P214, DOI 10.1016/j.trecan.2017.01.007
   Oboh OT, 2008, J BIOCHEM MOL TOXIC, V22, P51, DOI 10.1002/jbt.20214
   Orren DK, 2019, METHODS MOL BIOL, V1983, P107, DOI 10.1007/978-1-4939-9434-2_7
   Ostrem JM, 2013, NATURE, V503, P548, DOI 10.1038/nature12796
   Pleasance ED, 2010, NATURE, V463, P191, DOI 10.1038/nature08658
   Poku RA, 2017, AM J CANCER RES, V7, P1515
   Poku RA, 2014, ECANCERMEDICALSCIENC, V8, DOI 10.3332/ecancer.2014.459
   Prior IA, 2001, J CELL SCI, V114, P1603
   Prior IA, 2012, CANCER RES, V72, P2457, DOI 10.1158/0008-5472.CAN-11-2612
   Rabbani N, 2012, AMINO ACIDS, V42, P1087, DOI 10.1007/s00726-010-0782-1
   SAIKUMAR P, 1988, ONCOGENE RES, V3, P213
   Schuld NJ, 2014, J BIOL CHEM, V289, P6862, DOI 10.1074/jbc.M113.527192
   Sidhu RS, 2003, BIOCHEM BIOPH RES CO, V304, P655, DOI 10.1016/S0006-291X(03)00635-1
   Sieburth DS, 1998, CELL, V94, P119, DOI 10.1016/S0092-8674(00)81227-1
   Sperlich B, 2016, BIOPHYS J, V111, P113, DOI 10.1016/j.bpj.2016.05.042
   Steklov M, 2018, SCIENCE, V362, P1177, DOI 10.1126/science.aap7607
   Stephen AG, 2014, CANCER CELL, V25, P272, DOI 10.1016/j.ccr.2014.02.017
   Terrell EM, 2019, MOL CELL, V76, P872, DOI 10.1016/j.molcel.2019.09.004
   Villalonga P, 2001, MOL CELL BIOL, V21, P7345, DOI 10.1128/MCB.21.21.7345-7354.2001
   Vos MD, 2003, J BIOL CHEM, V278, P28045, DOI 10.1074/jbc.M300554200
   Wang DL, 2016, NATURE, V538, P118, DOI 10.1038/nature19759
   Wang MT, 2015, CELL, V163, P1237, DOI 10.1016/j.cell.2015.10.041
   Williams CL, 2013, CELL CYCLE, V12, P2933, DOI 10.4161/cc.26230
   Williams CL, 2003, CELL SIGNAL, V15, P1071, DOI 10.1016/S0898-6568(03)00098-6
   Wright LP, 2006, J LIPID RES, V47, P883, DOI 10.1194/jlr.R600004-JLR200
   Xie HB, 2007, J PROTEOME RES, V6, P1917, DOI 10.1021/pr060394e
   Yang MH, 2013, MOL CANCER RES, V11, P1072, DOI 10.1158/1541-7786.MCR-13-0040-T
   Yang MH, 2012, P NATL ACAD SCI USA, V109, P10843, DOI 10.1073/pnas.1201487109
   Ye N, 2019, CURR TOP MED CHEM, V19, P2114, DOI 10.2174/1568026619666190902145116
   Zhang SY, 2017, ACS CHEM BIOL, V12, P1703, DOI 10.1021/acschembio.7b00165
   Zhang XY, 2018, ACS CENTRAL SCI, V4, P71, DOI 10.1021/acscentsci.7b00440
   Zhao C, 2007, NAT CELL BIOL, V9, P706, DOI 10.1038/ncb1594
   Zhou Yong, 2020, Small GTPases, V11, P220, DOI 10.1080/21541248.2017.1379583
   Zhou Y, 2018, CSH PERSPECT MED, V8, DOI 10.1101/cshperspect.a031831
   Zhou Y, 2017, CELL, V168, P239, DOI 10.1016/j.cell.2016.11.059
NR 109
TC 7
Z9 7
U1 0
U2 4
PU MDPI
PI BASEL
PA ST ALBAN-ANLAGE 66, CH-4052 BASEL, SWITZERLAND
EI 1422-0067
J9 INT J MOL SCI
JI Int. J. Mol. Sci.
PD NOV
PY 2019
VL 20
IS 22
AR 5718
DI 10.3390/ijms20225718
PG 16
WC Biochemistry & Molecular Biology; Chemistry, Multidisciplinary
WE Science Citation Index Expanded (SCI-EXPANDED)
SC Biochemistry & Molecular Biology; Chemistry
GA JW0YW
UT WOS:000502786800200
PM 31739603
OA Green Published, gold
DA 2022-04-10
ER

PT J
AU Burbelo, PD
   Goldman, R
   Mattson, TL
AF Burbelo, PD
   Goldman, R
   Mattson, TL
TI A simplified immunoprecipitation method for quantitatively measuring
   antibody responses in clinical sera samples by using mammalian-produced
   Renilla luciferase-antigen fusion proteins
SO BMC BIOTECHNOLOGY
LA English
DT Article
ID P53 ANTIBODIES; MUTATIONAL ANALYSIS; CANCER-PATIENTS; GENE; PEPTIDES;
   PANEL
AB Background: Assays detecting human antigen-specific antibodies are medically useful. However, the usefulness of existing simple immunoassay formats is limited by technical considerations such as sera antibodies to contaminants in insufficiently pure antigen, a problem likely exacerbated when antigen panels are screened to obtain clinically useful data.
   Results: We developed a novel and simple immunoprecipitation technology for identifying clinical sera containing antigen-specific antibodies and for generating quantitative antibody response profiles. This method is based on fusing protein antigens to an enzyme reporter, Renilla luciferase (Ruc), and expressing these fusions in mammalian cells, where mammalian-specific post-translational modification can be added. After mixing crude extracts, sera and protein A/G beads together and incubating, during which the Ruc-antigen fusion become immobilized on the A/G beads, antigen-specific antibody is quantitated by washing the beads and adding coelenterazine substrate and measuring light production.
   We have characterized this technology with sera from patients having three different types of cancers. We show that 20 - 85% of these sera contain significant titers of antibodies against at least one of five frequently mutated and/or overexpressed tumor-associated proteins. Five of six colon cancer sera tested gave responses that were statistically significantly greater than the average plus three standard deviations of 10 control sera. The results of competition experiments, preincubating positive sera with unmodified E. coli-produced antigens, varied dramatically.
   Conclusion: This technology has several advantages over current quantitative immunoassays including its relative simplicity, its avoidance of problems associated with E. coli-produced antigens and its use of antigens that can carry mammalian or disease-specific post-translational modification. This assay should be generally useful for analyzing sera for antibodies recognizing any protein or its post-translational modification.
C1 Georgetown Univ, Med Ctr, Dept Oncol, Lombardi Comprehens Canc Ctr, Washington, DC 20057 USA.
RP Burbelo, PD (corresponding author), Georgetown Univ, Med Ctr, Dept Oncol, Lombardi Comprehens Canc Ctr, Washington, DC 20057 USA.
EM burbelpd@georgetown.edu; rg26@georgetown.edu; tommattson@yahoo.com
FU NATIONAL CANCER INSTITUTEUnited States Department of Health & Human
   ServicesNational Institutes of Health (NIH) - USANIH National Cancer
   Institute (NCI) [P30CA051008] Funding Source: NIH RePORTER; NATIONAL
   CENTER FOR RESEARCH RESOURCESUnited States Department of Health & Human
   ServicesNational Institutes of Health (NIH) - USANIH National Center for
   Research Resources (NCRR) [S10RR015768, M01RR020359] Funding Source: NIH
   RePORTER; NCI NIH HHSUnited States Department of Health & Human
   ServicesNational Institutes of Health (NIH) - USANIH National Cancer
   Institute (NCI) [P30 CA051008, 2P30-CA-51008] Funding Source: Medline;
   NCRR NIH HHSUnited States Department of Health & Human ServicesNational
   Institutes of Health (NIH) - USANIH National Center for Research
   Resources (NCRR) [M01 RR020359, M01 RR-020359, 1S10 RR15768-01] Funding
   Source: Medline
CR Bardelli A, 2003, SCIENCE, V300, P949, DOI 10.1126/science.1082596
   BJORCK L, 1984, J IMMUNOL, V133, P969
   Bode AM, 2004, NAT REV CANCER, V4, P793, DOI 10.1038/nrc1455
   Burbelo PD, 2002, BIOTECHNIQUES, V33, P1044, DOI 10.2144/02335st05
   CRAWFORD LV, 1982, INT J CANCER, V30, P403, DOI 10.1002/ijc.2910300404
   Fensterle J, 2004, BMC CANCER, V4, DOI 10.1186/1471-2407-4-62
   Hammel P, 1997, GUT, V40, P356, DOI 10.1136/gut.40.3.356
   Ishikawa T, 2003, CANCER RES, V63, P5564
   KOENEN M, 1982, EMBO J, V1, P509, DOI 10.1002/j.1460-2075.1982.tb01199.x
   Lim YP, 2005, CLIN CANCER RES, V11, P3163, DOI 10.1158/1078-0432.CCR-04-2243
   LUBIN R, 1993, CANCER RES, V53, P5872
   Old LJ, 1998, J EXP MED, V187, P1163, DOI 10.1084/jem.187.8.1163
   Perou CM, 2000, NATURE, V406, P747, DOI 10.1038/35021093
   PHIZICKY EM, 1995, MICROBIOL REV, V59, P94, DOI 10.1128/MMBR.59.1.94-123.1995
   Pirone DM, 2000, J BIOL CHEM, V275, P22650, DOI 10.1074/jbc.M002832200
   Preuss KD, 2002, IMMUNOL REV, V188, P43, DOI 10.1034/j.1600-065X.2002.18805.x
   Rajagopalan H, 2004, NATURE, V428, P77, DOI 10.1038/nature02313
   RUTHER U, 1982, P NATL ACAD SCI-BIOL, V79, P6852, DOI 10.1073/pnas.79.22.6852
   Samuels Y, 2004, SCIENCE, V304, P554, DOI 10.1126/science.1096502
   Schellekens GA, 1998, J CLIN INVEST, V101, P273, DOI 10.1172/JCI1316
   Sorlie T, 2003, P NATL ACAD SCI USA, V100, P8418, DOI 10.1073/pnas.0932692100
   Sorlie T, 2001, P NATL ACAD SCI USA, V98, P10869, DOI 10.1073/pnas.191367098
   Sotiriou C, 2003, P NATL ACAD SCI USA, V100, P10393, DOI 10.1073/pnas.1732912100
   Soussi T, 2000, CANCER RES, V60, P1777
   Stockert E, 1998, J EXP MED, V187, P1349, DOI 10.1084/jem.187.8.1349
   Takahashi M, 1995, CLIN CANCER RES, V1, P1071
   Utz PJ, 2000, ARTHRITIS RES, V2, P101, DOI 10.1186/ar75
   van't Veer LJ, 2002, NATURE, V415, P530, DOI 10.1038/415530a
   Vennegoor CJGM, 1997, CANCER LETT, V116, P93, DOI 10.1016/S0304-3835(97)00168-7
   Vogelstein B, 2004, NAT MED, V10, P789, DOI 10.1038/nm1087
   Wadhwa M, 1999, CLIN CANCER RES, V5, P1353
   Wang ZH, 2004, SCIENCE, V304, P1164, DOI 10.1126/science.1096096
   Wang ZH, 2004, CANCER RES, V64, P2998, DOI 10.1158/0008-5472.CAN-04-0587
   Yamada R, 2005, FRONT BIOSCI, V10, P54, DOI 10.2741/1506
   Zhang JY, 2003, CANCER EPIDEM BIOMAR, V12, P136
NR 35
TC 82
Z9 83
U1 0
U2 5
PU BMC
PI LONDON
PA CAMPUS, 4 CRINAN ST, LONDON N1 9XW, ENGLAND
EI 1472-6750
J9 BMC BIOTECHNOL
JI BMC Biotechnol.
PD AUG 18
PY 2005
VL 5
AR 22
DI 10.1186/1472-6750-5-22
PG 10
WC Biotechnology & Applied Microbiology
WE Science Citation Index Expanded (SCI-EXPANDED)
SC Biotechnology & Applied Microbiology
GA 964CE
UT WOS:000231855500001
PM 16109166
OA gold, Green Published
DA 2022-04-10
ER

PT J
AU Tudek, B
AF Tudek, Barbara
TI Base excision repair modulation as a risk factor for human cancers
SO MOLECULAR ASPECTS OF MEDICINE
LA English
DT Review
DE 8-oxoguanine; 1,N-6-ethenoadenine; 3,N-4-ethenocytosine; DNA repair;
   polymorphism; gene expression; lung cancer
ID OXIDATIVE DNA-DAMAGE; HUMAN 8-OXOGUANINE-DNA GLYCOSYLASE; CELL
   LUNG-CANCER; GENETIC POLYMORPHISMS; AP-ENDONUCLEASE; NITRIC-OXIDE;
   ALTERED EXPRESSION; XRCC1 INTERACTIONS; ESCHERICHIA-COLI; LIGASE-III
AB Oxidative DNA damage and DNA repair mediate the development of several human pathologies, including cancer. The major pathway for oxidative DNA damage repair is base excision repair (BER). Functional assays performed in blood leukocytes of cancer patients and matched controls show that specific BER pathway are decreased in cancer patients, and may be risk factors. These include 8-oxoguanine (8-oxoG) repair in lung and head and neck cancer patients and repair of lipid peroxidation (LPO) induced 1,N-6-ethenoadenine (epsilon A) in lung cancer patients. Decrease of excision of LPO-induced DNA damage, epsilon A and 3,N-4-ethenocytosine (epsilon C) was observed in blood leukocytes of patients developing lung adenocarcinoma, specific histological type of cancer related to inflammation and healing of scars. BER proteins activity depends on gene polymorphism, interactions between BER system partners and post-translational modification. Polymorphisms of DNA glycosylases may change their enzymatic activities, and some polymorphisms increase the risk of inflammation-related cancers, colorectal, lung and other types. Polymorphisms of BER platform protein, XRCCl are connected with increased risk of tobacco-related cancers. BER efficiency may also be changed by reactive oxygen species and some diet components, which induce transcription of several glycosylases as well as a major human AP-endonuclease, APEL BER is also changed in tumors in comparison to unaffected surrounding tissues, and this change may be due to transcription stimulation, post-translational modification of BER enzymes as well as protein-protein interaction. Modulation of BER enzymes activities may be, then, an important factor determining the risk of cancer and also may participate in cancer development. (C) 2007 Elsevier Ltd. All rights reserved.
C1 Polish Acad Sci, Inst Biochem & Biophys, Warsaw, Poland.
   Warsaw Univ, Inst Genet & Biotechnol, PL-02106 Warsaw, Poland.
RP Tudek, B (corresponding author), Polish Acad Sci, Inst Biochem & Biophys, Warsaw, Poland.
EM tudek@ibb.waw.pl
CR Arai K, 1997, ONCOGENE, V14, P2857, DOI 10.1038/sj.onc.1201139
   Bader SA, 2007, BRIT J CANCER, V96, P660, DOI 10.1038/sj.bjc.6603592
   Bartsch H, 2004, CANCER DETECT PREV, V28, P385, DOI 10.1016/j.cdp.2004.07.004
   BARTSCH H, 1994, DRUG METAB REV, V26, P349, DOI 10.3109/03602539409029802
   Bartsch H, 1999, IARC SCI PUBL, P1
   Bhakat KK, 2006, MOL CELL BIOL, V26, P1654, DOI 10.1128/MCB.26.5.1654-1665.2006
   Bhakat KK, 2004, NUCLEIC ACIDS RES, V32, P3033, DOI 10.1093/nar/gkh632
   Bouziane M, 2000, MUTAT RES-DNA REPAIR, V461, P15, DOI 10.1016/S0921-8777(00)00036-7
   Caldecott KW, 1996, NUCLEIC ACIDS RES, V24, P4387, DOI 10.1093/nar/24.22.4387
   Campalans A, 2005, DNA REPAIR, V4, P826, DOI 10.1016/j.dnarep.2005.04.014
   Cerda SR, 1998, FEBS LETT, V431, P12, DOI 10.1016/S0014-5793(98)00697-8
   Chatterjee A, 2005, FASEB J, V19, P112, DOI 10.1096/fj.04-3423fje
   Chen KH, 2000, CARCINOGENESIS, V21, P1017, DOI 10.1093/carcin/21.5.1017
   Chen L, 2003, J UROLOGY, V170, P2471, DOI 10.1097/01.ju.0000087498.23008.bb
   Chevillard S, 1998, ONCOGENE, V16, P3083, DOI 10.1038/sj.onc.1202096
   Cho EY, 2003, CANCER EPIDEM BIOMAR, V12, P1100
   Daviet S, 2007, DNA REPAIR, V6, P8, DOI 10.1016/j.dnarep.2006.08.001
   Didkowska J, 2002, CANC POLAND
   DIZDAROGLU M, 1993, CANCER RES, V53, P1269
   Fan CY, 2001, LAB INVEST, V81, P1429, DOI 10.1038/labinvest.3780356
   Fortini P, 2003, BIOCHIMIE, V85, P1053, DOI 10.1016/j.biochi.2003.11.003
   Fujimoto H, 1998, JPN J CANCER RES, V89, P696, DOI 10.1111/j.1349-7006.1998.tb03273.x
   Gackowski D, 2002, INT J CANCER, V101, P395, DOI 10.1002/ijc.10610
   Gackowski D, 2003, CANCER RES, V63, P4899
   Goode EL, 2002, CANCER EPIDEM BIOMAR, V11, P1513
   Graziewicz M, 1996, CARCINOGENESIS, V17, P2501, DOI 10.1093/carcin/17.11.2501
   Greenlee RT, 2000, CA-CANCER J CLIN, V50, P7, DOI 10.3322/canjclin.50.1.7
   Gros L, 2004, NUCLEIC ACIDS RES, V32, P73, DOI 10.1093/nar/gkh165
   Habib SL, 2003, CARCINOGENESIS, V24, P573, DOI 10.1093/carcin/24.3.573
   HAMMER SP, 1993, COMMON NEOPLASMA PUL, P1123
   Hansen R, 2005, CANCER LETT, V229, P85, DOI 10.1016/j.canlet.2005.04.019
   Hardie LJ, 2000, CARCINOGENESIS, V21, P167, DOI 10.1093/carcin/21.2.167
   Harrigan JA, 2006, NUCLEIC ACIDS RES, V34, P745, DOI 10.1093/nar/gkj475
   Hasan S, 2002, MOL CELL, V10, P1213, DOI 10.1016/S1097-2765(02)00745-1
   Hill JW, 2006, NUCLEIC ACIDS RES, V34, P1620, DOI 10.1093/nar/gkl060
   Hill JW, 2001, NUCLEIC ACIDS RES, V29, P430, DOI 10.1093/nar/29.2.430
   Hofseth LJ, 2004, J CLIN INVEST, V113, P490, DOI 10.1172/JCI200319757E1
   Hofseth LJ, 2003, J CLIN INVEST, V112, P1887, DOI 10.1172/JCI200319757
   HU J, 2005, NUCLEIC ACIDS RES, V33, P3371
   Hu JJ, 2001, CARCINOGENESIS, V22, P917, DOI 10.1093/carcin/22.6.917
   Hung RJ, 2005, AM J EPIDEMIOL, V162, P925, DOI 10.1093/aje/kwi318
   Ishchenko AA, 2005, MOL CELL BIOL, V25, P6380, DOI 10.1128/MCB.25.15.6380-6390.2005
   Jaiswal M, 2001, CANCER RES, V61, P6388
   Janssen K, 2001, MUTAT RES-DNA REPAIR, V486, P207, DOI 10.1016/S0921-8777(01)00096-9
   Jiao L, 2006, CANCER DETECT PREV, V30, P284, DOI 10.1016/j.cdp.2006.05.002
   Kelley MR, 2001, ANTIOXID REDOX SIGN, V3, P671, DOI 10.1089/15230860152543014
   Kennedy CH, 2003, FREE RADICAL BIO MED, V34, P1447, DOI 10.1016/S0891-5849(03)00176-X
   Kim HN, 2001, CARCINOGENESIS, V22, P265, DOI 10.1093/carcin/22.2.265
   Kohno T, 1998, ONCOGENE, V16, P3219, DOI 10.1038/sj.onc.1201872
   Krzesniak M, 2004, ANN HUM GENET, V68, P300, DOI 10.1046/j.1529-8817.2004.00079.x
   LAVAL F, 1994, CARCINOGENESIS, V15, P443, DOI 10.1093/carcin/15.3.443
   Leppard JB, 2003, MOL CELL BIOL, V23, P5919, DOI 10.1128/MCB.23.16.5919-5927.2003
   Levine RL, 2000, CANCER RES, V60, P4098
   Lu XB, 2004, MOL CELL, V15, P621, DOI 10.1016/j.molcel.2004.08.007
   Luna L, 2005, NUCLEIC ACIDS RES, V33, P1813, DOI 10.1093/nar/gki325
   MADRI JA, 1984, HUM PATHOL, V15, P625, DOI 10.1016/S0046-8177(84)80286-5
   Marsin S, 2003, J BIOL CHEM, V278, P44068, DOI 10.1074/jbc.M306160200
   MATTSON ME, 1987, AM J PUBLIC HEALTH, V77, P425, DOI 10.2105/AJPH.77.4.425
   Meyer F, 2000, TOXICOLOGY, V146, P83, DOI 10.1016/S0300-483X(00)00140-2
   Migliore L, 2002, MUTAT RES-REV MUTAT, V512, P135, DOI 10.1016/S1383-5742(02)00046-7
   Mishina Y, 2005, J AM CHEM SOC, V127, P14594, DOI 10.1021/ja055957m
   Moriya M, 1999, IARC SCI PUBL, P263
   Nair J, 2006, ANTIOXID REDOX SIGN, V8, P1003, DOI 10.1089/ars.2006.8.1003
   Nazarkina ZK, 2007, DNA REPAIR, V6, P254, DOI 10.1016/j.dnarep.2006.10.002
   Nohmi T, 2005, MUTAT RES-FUND MOL M, V591, P60, DOI 10.1016/j.mrfmmm.2005.03.033
   Olinski R, 2002, FREE RADICAL BIO MED, V33, P192, DOI 10.1016/S0891-5849(02)00878-X
   Parker AR, 2003, J BIOL CHEM, V278, P47937, DOI 10.1074/jbc.M306598200
   Paz-Elizur T, 2003, J NATL CANCER I, V95, P1312, DOI 10.1093/jnci/djg033
   Paz-Elizur T, 2006, CANCER RES, V66, P11683, DOI 10.1158/0008-5472.CAN-06-2294
   Petersen I, 1997, BRIT J CANCER, V75, P79, DOI 10.1038/bjc.1997.13
   Pines A, 2005, NUCLEIC ACIDS RES, V33, P4379, DOI 10.1093/nar/gki751
   Privezentzev CV, 2001, MUTAT RES-FUND MOL M, V480, P277, DOI 10.1016/S0027-5107(01)00186-5
   Robertson KA, 2001, CANCER RES, V61, P2220
   Rusin M, 1999, Hum Mutat, V14, P269, DOI 10.1002/(SICI)1098-1004(1999)14:3<269::AID-HUMU13>3.0.CO;2-6
   Russo MT, 2004, MOL CELL BIOL, V24, P465, DOI 10.1128/MCB.24.1.465-474.2004
   Saetta M, 1999, AM J RESP CRIT CARE, V160, pS17, DOI 10.1164/ajrccm.160.supplement_1.6
   Saparbaev M, 1998, P NATL ACAD SCI USA, V95, P8508, DOI 10.1073/pnas.95.15.8508
   SAPARBAEV M, 1995, NUCLEIC ACIDS RES, V23, P3750, DOI 10.1093/nar/23.18.3750
   Schreiber V, 2002, J BIOL CHEM, V277, P23028, DOI 10.1074/jbc.M202390200
   SHIMOSATO Y, 1995, LUNG CANCER, P28
   Speina E, 2005, JNCI-J NATL CANCER I, V97, P384, DOI 10.1093/jnci/dji058
   Speina E, 2003, CANCER RES, V63, P4351
   Steinacher R, 2005, CURR BIOL, V15, P616, DOI 10.1016/j.cub.2005.02.054
   Sugimura H, 1999, CANCER EPIDEM BIOMAR, V8, P669
   Tini M, 2002, MOL CELL, V9, P265, DOI 10.1016/S1097-2765(02)00453-7
   Todd S, 1997, CANCER RES, V57, P1344
   Touati E, 2006, HELICOBACTER, V11, P494, DOI 10.1111/j.1523-5378.2006.00442.x
   Tuimala J, 2004, MUTAT RES-FUND MOL M, V554, P319, DOI 10.1016/j.mrfmmm.2004.05.009
   Tuo JS, 2002, DNA REPAIR, V1, P913, DOI 10.1016/S1568-7864(02)00116-7
   Wiederhold L, 2004, MOL CELL, V15, P209, DOI 10.1016/j.molcel.2004.06.003
   WINK DA, 1994, CARCINOGENESIS, V15, P2125, DOI 10.1093/carcin/15.10.2125
   Winnepenninckx VR, 2006, JNCI-J NATL CANCER I, V98, P472, DOI 10.1093/jnci/djj103
   Wong E, 2002, P NATL ACAD SCI USA, V99, P14937, DOI 10.1073/pnas.232579299
   WOOD RD, 2001, MUTAT RES, V577, P275
   Zhou JM, 2001, EMBO J, V20, P914, DOI 10.1093/emboj/20.4.914
   Zienolddiny S, 2006, CARCINOGENESIS, V27, P560, DOI 10.1093/carcin/bgi232
NR 96
TC 135
Z9 139
U1 0
U2 13
PU ELSEVIER
PI AMSTERDAM
PA RADARWEG 29, 1043 NX AMSTERDAM, NETHERLANDS
SN 0098-2997
EI 1872-9452
J9 MOL ASPECTS MED
JI Mol. Asp. Med.
PD JUN-AUG
PY 2007
VL 28
IS 3-4
BP 258
EP 275
DI 10.1016/j.mam.2007.05.003
PG 18
WC Biochemistry & Molecular Biology; Medicine, Research & Experimental
WE Science Citation Index Expanded (SCI-EXPANDED)
SC Biochemistry & Molecular Biology; Research & Experimental Medicine
GA 217IQ
UT WOS:000249942000002
PM 17628657
DA 2022-04-10
ER

PT J
AU Gil, J
   Betancourt, LH
   Pla, I
   Sanchez, A
   Appelqvist, R
   Miliotis, T
   Kuras, M
   Oskolas, H
   Kim, Y
   Horvath, Z
   Eriksson, J
   Berge, E
   Burestedt, E
   Jonsson, G
   Baldetorp, B
   Ingvar, C
   Olsson, H
   Lundgren, L
   Horvatovich, P
   Murillo, JR
   Sugihara, Y
   Welinder, C
   Wieslander, E
   Lee, B
   Lindberg, H
   Pawlowski, K
   Kwon, HJ
   Doma, V
   Timar, J
   Karpati, S
   Szasz, AM
   Nemeth, IB
   Nishimura, T
   Corthals, G
   Rezeli, M
   Knudsen, B
   Malm, J
   Marko-Varga, G
AF Gil, Jeovanis
   Betancourt, Lazaro Hiram
   Pla, Indira
   Sanchez, Aniel
   Appelqvist, Roger
   Miliotis, Tasso
   Kuras, Magdalena
   Oskolas, Henriette
   Kim, Yonghyo
   Horvath, Zsolt
   Eriksson, Jonatan
   Berge, Ethan
   Burestedt, Elisabeth
   Jonsson, Goran
   Baldetorp, Bo
   Ingvar, Christian
   Olsson, Hakan
   Lundgren, Lotta
   Horvatovich, Peter
   Murillo, Jimmy Rodriguez
   Sugihara, Yutaka
   Welinder, Charlotte
   Wieslander, Elisabet
   Lee, Boram
   Lindberg, Henrik
   Pawlowski, Krzysztof
   Kwon, Ho Jeong
   Doma, Viktoria
   Timar, Jozsef
   Karpati, Sarolta
   Szasz, A. Marcell
   Nemeth, Istvan Balazs
   Nishimura, Toshihide
   Corthals, Garry
   Rezeli, Melinda
   Knudsen, Beatrice
   Malm, Johan
   Marko-Varga, Gyorgy
TI Clinical protein science in translational medicine targeting malignant
   melanoma
SO CELL BIOLOGY AND TOXICOLOGY
LA English
DT Article
DE Malignant melanoma; Translational medicine; Clinical proteomics;
   post-translational modification; Cancer moonshot
ID EPITHELIAL-MESENCHYMAL TRANSITION; AMERICAN JOINT COMMITTEE; CIRCULATING
   TUMOR DNA; PHOSPHOPEPTIDE ENRICHMENT; LIQUID-CHROMATOGRAPHY; INTEGRATIVE
   ANALYSIS; METASTATIC MELANOMA; CUTANEOUS MELANOMA; PRIMARY RESISTANCE;
   IMPROVED SURVIVAL
AB Melanoma of the skin is the sixth most common type of cancer in Europe and accounts for 3.4% of all diagnosed cancers. More alarming is the degree of recurrence that occurs with approximately 20% of patients lethally relapsing following treatment. Malignant melanoma is a highly aggressive skin cancer and metastases rapidly extend to the regional lymph nodes (stage 3) and to distal organs (stage 4). Targeted oncotherapy is one of the standard treatment for progressive stage 4 melanoma, and BRAF inhibitors (e.g. vemurafenib, dabrafenib) combined with MEK inhibitor (e.g. trametinib) can effectively counter BRAFV600E-mutated melanomas. Compared to conventional chemotherapy, targeted BRAFV600E inhibition achieves a significantly higher response rate. After a period of cancer control, however, most responsive patients develop resistance to the therapy and lethal progression. The many underlying factors potentially causing resistance to BRAF inhibitors have been extensively studied. Nevertheless, the remaining unsolved clinical questions necessitate alternative research approaches to address the molecular mechanism underlying metastatic and treatment-resistant melanoma. In broader terms, proteomics can address clinical questions far beyond the reach of genomics, by measuring, i.e. the relative abundance of protein products, post-translational modification (PTMs), protein localisation, turnover, protein interactions and protein function. More specifically, proteomic analysis of body fluids and tissues in a given medical and clinical setting can aid in the identification of cancer biomarkers and novel therapeutic target. Achieving this goal requires the development of a robust and reproducible clinical proteomic platform that encompasses automated biobanking of patient samples, tissue sectioning and histological examination, efficient protein extraction, enzymatic digestion, mass spectrometry-based quantitative protein analysis by label-free or labelling technologies and/or enrichment of peptides with specific PTMs. By combining data from, e.g. phosphoproteomics and acetylomics, the protein expression profiles of different melanoma stages can provide a solid framework for understanding the biology and progression of the disease. When complemented by proteogenomics, customised protein sequence databases generated from patient-specific genomic and transcriptomic data aid in interpreting clinical proteomic biomarker data to provide a deeper and more comprehensive molecular characterisation of cellular functions underlying disease progression. In parallel to a streamlined, patient-centric, clinical proteomic pipeline, mass spectrometry-based imaging can aid in interrogating the spatial distribution of drugs and drug metabolites within tissues at single-cell resolution. These developments are an important advancement in studying drug action and efficacy in vivo and will aid in the development of more effective and safer strategies for the treatment of melanoma. A collaborative effort of gargantuan proportions between academia and healthcare professionals has led to the initiation, establishment and development of a cutting-edge cancer research centre with a specialisation in melanoma and lung cancer. The primary research focus of the European Cancer Moonshot Lund Center is to understand the impact that drugs have on cancer at an individualised and personalised level. Simultaneously, the centre increases awareness of the relentless battle against cancer and attracts global interest in the exceptional research performed at the centre.
C1 [Gil, Jeovanis; Betancourt, Lazaro Hiram; Pla, Indira; Sanchez, Aniel; Appelqvist, Roger; Miliotis, Tasso; Kuras, Magdalena; Oskolas, Henriette; Kim, Yonghyo; Horvath, Zsolt; Eriksson, Jonatan; Berge, Ethan; Burestedt, Elisabeth; Murillo, Jimmy Rodriguez; Sugihara, Yutaka; Lee, Boram; Lindberg, Henrik; Pawlowski, Krzysztof; Kwon, Ho Jeong; Szasz, A. Marcell; Rezeli, Melinda; Marko-Varga, Gyorgy] Lund Univ, Biomed Ctr, Dept Biomed Engn, Clin Prot Sci & Imaging, BMC D13, S-22184 Lund, Sweden.
   [Pla, Indira; Sanchez, Aniel; Malm, Johan] Lund Univ, Skane Univ Hosp, Dept Translat Med, Sect Clin Chem, S-20502 Malmo, Sweden.
   [Miliotis, Tasso] AstraZeneca, IMED Biotech Unit, Translat Sci Cardiovasc Renal & Metab, Gothenburg, Sweden.
   [Jonsson, Goran; Baldetorp, Bo; Olsson, Hakan; Lundgren, Lotta; Welinder, Charlotte; Wieslander, Elisabet; Szasz, A. Marcell] Lund Univ, Dept Clin Sci Lund, Div Oncol & Pathol, S-22185 Lund, Sweden.
   [Ingvar, Christian] Lund Univ, Dept Surg, SUS, Clin Sci, Lund, Sweden.
   [Lundgren, Lotta] Skane Univ Hosp, Dept Haematol Oncol & Radiat Phys, Lund, Sweden.
   [Horvatovich, Peter] Univ Groningen, Fac Sci & Engn, Dept Analyt Biochem, Groningen, Netherlands.
   [Pawlowski, Krzysztof] Warsaw Univ Life Sci, Fac Agr & Biol, Dept Expt Design & Bioinformat, Warsaw, Poland.
   [Kwon, Ho Jeong; Marko-Varga, Gyorgy] Yonsei Univ, Coll Life Sci & Biotechnol, Dept Biotechnol, Chem Genom Global Res Lab, Seoul, South Korea.
   [Doma, Viktoria; Timar, Jozsef] Semmelweis Univ, Dept Pathol 2, Budapest, Hungary.
   [Karpati, Sarolta] Semmelweis Univ, Dept Dermatol, Budapest, Hungary.
   [Szasz, A. Marcell] Semmelweis Univ, Canc Ctr, H-1083 Budapest, Hungary.
   [Szasz, A. Marcell] Hungarian Acad Sci, MTA TTK Momentum Oncol Biomarker Res Grp, H-1117 Budapest, Hungary.
   [Nemeth, Istvan Balazs] Univ Szeged, Dept Dermatol & Allergol, H-6720 Szeged, Hungary.
   [Nishimura, Toshihide] St Marianna Univ, Clin Translat Med Informat, Sch Med, Kawasaki, Kanagawa, Japan.
   [Nishimura, Toshihide; Marko-Varga, Gyorgy] Tokyo Med Univ, Dept Surg, Shinjiku Ku, 6-7-1 Nishishinjiku, Tokyo, Japan.
   [Corthals, Garry] Vant Hoff Inst Mol Sci, NL-1090 GS Amsterdam, Netherlands.
   [Knudsen, Beatrice] Cedars Sinai Med Ctr, Biomed Sci & Pathol, Los Angeles, CA 90048 USA.
RP Gil, J; Betancourt, LH (corresponding author), Lund Univ, Biomed Ctr, Dept Biomed Engn, Clin Prot Sci & Imaging, BMC D13, S-22184 Lund, Sweden.
EM jeovanis.gil_valdes@med.lu.se; lazaro.betancourt@med.lu.se
RI Pla, Indira/AAI-4045-2020; Kim, Yonghyo/AAK-1779-2020; 권,
   호정/AAS-3642-2021; Pawlowski, Krzysztof/C-2949-2013; Gil Valdes,
   Jeovanis/G-6390-2016; Welinder, Charlotte/G-1144-2014
OI Pla, Indira/0000-0002-0839-7829; HORVATOVICH, PETER/0000-0003-2218-1140;
   Kuras, Magdalena/0000-0002-9479-423X; Pawlowski,
   Krzysztof/0000-0002-5367-0935; Olsson, Hakan/0000-0002-8794-9635; Gil
   Valdes, Jeovanis/0000-0003-3601-3893; Welinder,
   Charlotte/0000-0001-9626-0576
FU Berta Kamprad Foundation; ThermoFisher Scientific, Global, and Liconic
   Biobanking; National Research Foundation of Korea - Korean
   governmentNational Research Foundation of KoreaKorean Government
   [2015K1A1A2028365, 2016K2A9A1A03904900]; Brain Korea 21 Plus Project,
   Republic of Korea; NIH/NCI International Cancer Proteogenome Consortium
   [MOU NIH-LUND 2017-01]
FX This study was supported by the Berta Kamprad Foundation, ThermoFisher
   Scientific, Global, and Liconic Biobanking, and was also supported by
   grants from the National Research Foundation of Korea, funded by the
   Korean government (2015K1A1A2028365 and 2016K2A9A1A03904900) and Brain
   Korea 21 Plus Project, Republic of Korea, as well as the NIH/NCI
   International Cancer Proteogenome Consortium (MOU NIH-LUND 2017-01), and
   the Cancer Moonshot scientific and outreach activities, through where
   data will be made public.
CR Abelin JG, 2016, MOL CELL PROTEOMICS, V15, P1622, DOI 10.1074/mcp.M116.058354
   Aebersold R, 2018, NAT CHEM BIOL, V14, P206, DOI [10.1038/NCHEMBIO.2576, 10.1038/nchembio.2576]
   Akbani R, 2015, CELL, V161, P1681, DOI 10.1016/j.cell.2015.05.044
   Alexandrov T, 2012, BMC BIOINFORMATICS, V13, DOI 10.1186/1471-2105-13-S16-S11
   Alonso SR, 2007, CANCER RES, V67, P3450, DOI 10.1158/0008-5472.CAN-06-3481
   Ardito F, 2017, INT J MOL MED, V40, P271, DOI 10.3892/ijmm.2017.3036
   Arkenau HT, 2011, BRIT J CANCER, V104, P392, DOI 10.1038/sj.bjc.6606030
   Arrowsmith J, 2013, NAT REV DRUG DISCOV, V12, P568, DOI 10.1038/nrd4090
   Aung PP, 2015, HUM PATHOL, V46, P304, DOI 10.1016/j.humpath.2014.11.006
   Basken J, 2018, MOL CELL PROTEOMICS, V17, P550, DOI 10.1074/mcp.RA117.000335
   Batth TS, 2014, J PROTEOME RES, V13, P6176, DOI 10.1021/pr500893m
   Bauer J, 2011, PIGM CELL MELANOMA R, V24, P345, DOI 10.1111/j.1755-148X.2011.00837.x
   Bemis KD, 2015, BIOINFORMATICS, V31, P2418, DOI 10.1093/bioinformatics/btv146
   Bersanelli M, 2016, BMC BIOINFORMATICS, V17, DOI 10.1186/s12859-015-0857-9
   Boersema PJ, 2008, ANAL BIOANAL CHEM, V391, P151, DOI 10.1007/s00216-008-1865-7
   BRESLOW A, 1970, ANN SURG, V172, P902, DOI 10.1097/00000658-197011000-00017
   Broekaert SMC, 2010, PIGM CELL MELANOMA R, V23, P763, DOI 10.1111/j.1755-148X.2010.00778.x
   Buder-Bakhaya K, 2017, ONCOL RES TREAT, V40, P430, DOI 10.1159/000478893
   Burotto M, 2014, CANCER-AM CANCER SOC, V120, P3446, DOI 10.1002/cncr.28864
   Busam KJ, 2013, SEMIN DIAGN PATHOL, V30, P362, DOI 10.1053/j.semdp.2013.11.002
   Calapre L, 2017, CANCER LETT, V404, P62, DOI 10.1016/j.canlet.2017.06.030
   Caramel J, 2013, CANCER CELL, V24, P466, DOI 10.1016/j.ccr.2013.08.018
   Chapman PB, 2015, NEW ENGL J MED, V372, P2073, DOI 10.1056/NEJMc1501894
   Chapman PB, 2011, NEW ENGL J MED, V364, P2507, DOI 10.1056/NEJMoa1103782
   Charkoftaki G, 2018, HUM GENOMICS, V12, DOI 10.1186/s40246-018-0142-x
   Chelius D, 2002, J PROTEOME RES, V1, P317, DOI 10.1021/pr025517j
   Chiappetta C, 2015, APPL IMMUNOHISTO M M, V23, P172, DOI 10.1097/PAI.0000000000000071
   Connell JJ, 2015, ANAL BIOANAL CHEM, V407, P2245, DOI 10.1007/s00216-014-8350-2
   Cook D, 2014, NAT REV DRUG DISCOV, V13, P419, DOI 10.1038/nrd4309
   Cook JC, 2018, J TOXICOL SCI, V43, P565, DOI 10.2131/jts.43.565
   Cooper LAD, 2015, LAB INVEST, V95, P366, DOI 10.1038/labinvest.2014.153
   Curtin JA, 2005, NEW ENGL J MED, V353, P2135, DOI 10.1056/NEJMoa050092
   Curtin JA, 2006, J CLIN ONCOL, V24, P4340, DOI 10.1200/JCO.2006.06.2984
   Dagogo-Jack I, 2018, JCO PRECISION ONCOLO, P1
   de Graaf EL, 2016, J PROTEOME RES, V15, P4722, DOI 10.1021/acs.jproteome.6b00889
   de Lange MJ, 2018, MOL CANCER RES, V16, P1902, DOI 10.1158/1541-7786.MCR-18-0114
   Dimitrakopoulos C, 2018, BIOINFORMATICS, V34, P2441, DOI 10.1093/bioinformatics/bty148
   Dimitriou F, 2018, CURR ONCOL REP, V20, DOI 10.1007/s11912-018-0732-8
   Eichhoff OM, 2011, PIGM CELL MELANOMA R, V24, P631, DOI 10.1111/j.1755-148X.2011.00871.x
   El Ghissassi F, 2009, LANCET ONCOL, V10, P751, DOI 10.1016/S1470-2045(09)70213-X
   Emanuel PO, 2008, AM J DERMATOPATH, V30, P178, DOI 10.1097/DAD.0b013e318165641a
   Erdei E, 2010, EXPERT REV ANTICANC, V10, P1811, DOI [10.1586/era.10.170, 10.1586/ERA.10.170]
   Eroglu Z, 2018, NATURE, V553, P347, DOI 10.1038/nature25187
   Falzone L, 2018, FRONT PHARMACOL, V9, DOI 10.3389/fphar.2018.01300
   Fehniger T. E., 2013, EUPA OPEN PROTEOMICS, V1, P3
   Fehniger TE, 2011, ANAL CHEM, V83, P8329, DOI 10.1021/ac2014349
   Ferlay J, 2015, INT J CANCER, V136, pE359, DOI 10.1002/ijc.29210
   Fernandez AF, 2012, GENOME RES, V22, P407, DOI 10.1101/gr.119867.110
   Fitzmaurice C, 2018, JAMA ONCOL, V4, P1553, DOI 10.1001/jamaoncol.2018.2706
   Flaherty KT, 2012, NEW ENGL J MED, V367, P107, DOI 10.1056/NEJMoa1203421
   Forbes SA, 2017, NUCLEIC ACIDS RES, V45, pD777, DOI 10.1093/nar/gkw1121
   Fu SQ, 2017, ONCOTARGET, V8, P78163, DOI 10.18632/oncotarget.18293
   Galan JA, 2014, P NATL ACAD SCI USA, V111, pE2918, DOI 10.1073/pnas.1405601111
   Gara SK, 2018, NAT COMMUN, V9, DOI 10.1038/s41467-018-06366-z
   Gareau DS, 2017, EXP DERMATOL, V26, P615, DOI 10.1111/exd.13250
   Gerdes MJ, 2013, P NATL ACAD SCI USA, V110, P11982, DOI 10.1073/pnas.1300136110
   Gershenwald JE, 2017, CA-CANCER J CLIN, V67, P472, DOI 10.3322/caac.21409
   Gessel MM, 2014, J PROTEOMICS, V107, P71, DOI 10.1016/j.jprot.2014.03.021
   Giesen C, 2014, NAT METHODS, V11, P417, DOI [10.1038/NMETH.2869, 10.1038/nmeth.2869]
   Gil J, 2017, J BIOL CHEM, V292, P18129, DOI 10.1074/jbc.M117.784546
   Glazer AM, 2017, JAMA DERMATOL, V153, P225, DOI 10.1001/jamadermatol.2016.4512
   Goltsev Y, 2018, CELL, V174, P968, DOI 10.1016/j.cell.2018.07.010
   Gray ES, 2015, ONCOTARGET, V6, P42008, DOI 10.18632/oncotarget.5788
   Guo Y, 2018, J CELL PHYSL, V2018, P7356
   Haenssle HA, 2018, ANN ONCOL, V29, P1836, DOI 10.1093/annonc/mdy166
   Han JY, 2014, LUNG CANCER, V85, P161, DOI 10.1016/j.lungcan.2014.04.009
   Hanahan D, 2011, CELL, V144, P646, DOI 10.1016/j.cell.2011.02.013
   Hauschild A, 2012, LANCET, V380, P358, DOI 10.1016/S0140-6736(12)60868-X
   Helleday T, 2011, MOL ONCOL, V5, P387, DOI 10.1016/j.molonc.2011.07.001
   Hoek KS, 2008, CANCER RES, V68, P650, DOI 10.1158/0008-5472.CAN-07-2491
   Hu-Lieskovan S, 2014, J CLIN ONCOL, V32, P2248, DOI 10.1200/JCO.2013.52.1377
   Huang J, 2016, FRONT GENET, V7, DOI [10.3389/fgene.2016.00084, 10.3389/fgene.2017.00084]
   HUNTER T, 1995, CELL, V80, P225, DOI 10.1016/0092-8674(95)90405-0
   Hwang WL, 2019, JNCI-J NATL CANCER I, V111, P695, DOI 10.1093/jnci/djy157
   Ing N, 2017, SCI REP-UK, V7, DOI 10.1038/s41598-017-13196-4
   Jin Y, 2018, LUNG CANCER, V124, P110, DOI 10.1016/j.lungcan.2018.07.039
   Jones PA, 2002, NAT REV GENET, V3, P415, DOI 10.1038/nrg816
   Karpozilos A, 2004, EUR J CANCER, V40, P2033, DOI 10.1016/j.ejca.2004.04.036
   Kato H, 2011, J PROTEOME RES, V10, P51, DOI 10.1021/pr100859b
   Kaur C, 2008, J CLIN PATHOL, V61, P297, DOI 10.1136/jcp.2007.049411
   Kemper K, 2014, CANCER RES, V74, P5937, DOI 10.1158/0008-5472.CAN-14-1174
   Keohane SG, 2018, BRIT J DERMATOL, V179, P824, DOI 10.1111/bjd.16892
   Kim MS, 2014, NATURE, V509, P575, DOI 10.1038/nature13302
   Koga Y, 2009, GENOME RES, V19, P1462, DOI 10.1101/gr.091447.109
   Krumm A, 2016, CANCER RES, V76, P3067, DOI 10.1158/0008-5472.CAN-15-2680
   Kuras M, 2019, J PROTEOME RES, V18, P548, DOI 10.1021/acs.jproteome.8b00792
   Kwon HJ, 2015, ARCH PHARM RES, V38, P1718, DOI 10.1007/s12272-015-0627-2
   Larkin J, 2015, NEW ENGL J MED, V373, P1270, DOI [10.1056/NEJMoa1504030, 10.1056/NEJMc1509660]
   Fernandez-Coto DL, 2018, J PROTEOMICS, V186, P15, DOI 10.1016/j.jprot.2018.07.013
   Leonardi GC, 2018, INT J ONCOL, V52, P1071, DOI 10.3892/ijo.2018.4287
   Li FZ, 2015, FRONT ONCOL, V5, DOI 10.3389/fonc.2015.00031
   Li JC, 2018, NUCLEIC ACIDS RES, V46, pD1039, DOI 10.1093/nar/gkx1039
   Li J, 2010, HUM MUTAT, V31, P219, DOI 10.1002/humu.21176
   Lin Y, 2008, ANAL BIOCHEM, V377, P259, DOI 10.1016/j.ab.2008.03.009
   Linos E, 2009, J INVEST DERMATOL, V129, P1666, DOI 10.1038/jid.2008.423
   Litovkin K, 2015, PLOS ONE, V10, DOI 10.1371/journal.pone.0130651
   Litovkin K, 2014, J CANCER RES CLIN, V140, P1849, DOI 10.1007/s00432-014-1738-8
   Lobas AA, 2018, J PROTEOME RES, V17, P1801, DOI 10.1021/acs.jproteome.7b00841
   Lombardi Benedetta, 2015, EuPA Open Proteom, V6, P10
   Low TY, 2013, CELL REP, V5, P1469, DOI 10.1016/j.celrep.2013.10.041
   Madabhushi A, 2016, MED IMAGE ANAL, V33, P170, DOI 10.1016/j.media.2016.06.037
   Malm J, 2018, CLIN TRANSL MED, V7, DOI 10.1186/s40169-018-0203-8
   Malm J, 2015, CLIN TRANSL MED, V4, DOI 10.1186/s40169-015-0067-0
   Malm J, 2013, J PROTEOME RES, V12, P3087, DOI 10.1021/pr400131r
   Manadas B, 2010, EXPERT REV PROTEOMIC, V7, P655, DOI [10.1586/epr.10.46, 10.1586/EPR.10.46]
   Marko-Varga G, 2007, J PROTEOME RES, V6, P2925, DOI 10.1021/pr070046s
   Marko-Varga G, 2012, CLIN TRANSL MED, V1, DOI 10.1186/2001-1326-1-8
   Marko-Varga G, 2012, J PROTEOME RES, V11, P5124, DOI 10.1021/pr300185k
   Massi D, 2002, VIRCHOWS ARCH, V440, P22, DOI 10.1007/s004280100480
   Mertins P, 2016, NATURE, V534, P55, DOI 10.1038/nature18003
   Mertins P, 2013, NAT METHODS, V10, P634, DOI 10.1038/nmeth.2518
   Misra BB, 2019, J MOL ENDOCRINOL, V62, pR21, DOI 10.1530/JME-18-0055
   Mok TS, 2009, NEW ENGL J MED, V361, P947, DOI 10.1056/NEJMoa0810699
   Montoni A, 2013, FRONT PHARMACOL, V4, DOI 10.3389/fphar.2013.00018
   Murali R, 2010, CANCER-AM CANCER SOC, V116, P4130, DOI 10.1002/cncr.25148
   Musella A, 2018, CANCER TREAT REV, V66, P7, DOI 10.1016/j.ctrv.2018.03.004
   Nesvizhskii AI, 2014, NAT METHODS, V11, P1114, DOI [10.1038/NMETH.3144, 10.1038/nmeth.3144]
   Nogami N, 2019, RESPIR INVESTIG, V57, P27, DOI 10.1016/j.resinv.2018.09.003
   Nyberg F, 2011, PLOS ONE, V6, DOI 10.1371/journal.pone.0022062
   Olsen Thomas George, 2018, J Pathol Inform, V9, P32, DOI 10.4103/jpi.jpi_31_18
   Papeo G, 2013, EXPERT OPIN THER PAT, V23, P503, DOI 10.1517/13543776.2013.768615
   Paska AV, 2015, BIOCHEM MEDICA, V25, P161, DOI 10.11613/BM.2015.017
   Pasquali S, 2011, EJSO-EUR J SURG ONC, V37, P675, DOI 10.1016/j.ejso.2011.05.007
   Paul SM, 2010, NAT REV DRUG DISCOV, V9, P203, DOI 10.1038/nrd3078
   Piehowski PD, 2013, J PROTEOME RES, V12, P2128, DOI 10.1021/pr301146m
   Pierard GE, 2012, DERMAT RES PRACT, V2012, DOI 10.1155/2012/173491
   Pimiento JM, 2013, LAB INVEST, V93, P858, DOI 10.1038/labinvest.2013.84
   Plummer R, 2013, CANCER CHEMOTH PHARM, V71, P1191, DOI 10.1007/s00280-013-2113-1
   Post H, 2017, J PROTEOME RES, V16, P728, DOI 10.1021/acs.jproteome.6b00753
   Ray B, 2017, CANCER INFORM, V16, DOI 10.1177/1176935117725727
   Rigel DS, 2010, ARCH DERMATOL, V146, P318, DOI 10.1001/archdermatol.2009.379
   Robert C, 2015, NEW ENGL J MED, V372, P30, DOI 10.1056/NEJMoa1412690
   Robertson AG, 2017, CANCER CELL, V32, P204, DOI 10.1016/j.ccell.2017.07.003
   Rodriguez-Cerdeira C, 2018, J PROTEOMICS, V188, P152, DOI 10.1016/j.jprot.2017.11.005
   Rocken M, 2010, J CLIN INVEST, V120, P1800, DOI 10.1172/JCI43424
   Rohart F, 2017, PLOS COMPUT BIOL, V13, DOI 10.1371/journal.pcbi.1005752
   Salemi R, 2018, FRONT PHARMACOL, V9, DOI 10.3389/fphar.2018.00856
   Saltz J, 2018, CELL REP, V23, P181, DOI 10.1016/j.celrep.2018.03.086
   Sandru A, 2014, J Med Life, V7, P572
   Scaini MC, 2019, MELANOMA RES, V29, P89, DOI 10.1097/CMR.0000000000000510
   Schlacher K, 2017, NAT CELL BIOL, V19, P1309, DOI 10.1038/ncb3638
   Scholz C, 2015, NAT BIOTECHNOL, V33, P415, DOI 10.1038/nbt.3130
   Schwanhausser B, 2011, NATURE, V473, P337, DOI 10.1038/nature10098
   Schwarzenbach H, 2011, NAT REV CANCER, V11, P426, DOI 10.1038/nrc3066
   Sharma K, 2014, CELL REP, V8, P1583, DOI 10.1016/j.celrep.2014.07.036
   Smit MA, 2014, MOL SYST BIOL, V10, DOI 10.15252/msb.20145450
   SONDERGAARD K, 1985, PATHOLOGY, V17, P255, DOI 10.3109/00313028509063763
   Strauss DC, 2010, LANCET ONCOL, V11, P790, DOI 10.1016/S1470-2045(10)70024-3
   Sugihara Y, 2018, CLIN TRANSL MED, V7, DOI 10.1186/s40169-018-0201-x
   Sugihara Y, 2014, PROTEOMICS, V14, P1963, DOI 10.1002/pmic.201300476
   Suits F, 2013, ANAL CHEM, V85, P4398, DOI 10.1021/ac303658t
   Szasz AM, 2019, CELL BIOL TOXICOL, V35, P1, DOI 10.1007/s10565-018-9446-9
   Szasz AM, 2017, SEMIN CELL DEV BIOL, V64, P132, DOI 10.1016/j.semcdb.2016.08.026
   Tarrant MK, 2009, ANNU REV BIOCHEM, V78, P797, DOI 10.1146/annurev.biochem.78.070907.103047
   The International Agency for Research on Cancer (IARC), 2018, LAT GLOB CANC DAT 20
   Thingholm TE, 2016, METHODS MOL BIOL, V1355, P123, DOI 10.1007/978-1-4939-3049-4_8
   Thingholm TE, 2016, METHODS MOL BIOL, V1355, P135, DOI 10.1007/978-1-4939-3049-4_9
   Thorsson V, 2018, IMMUNITY, V48, P812, DOI 10.1016/j.immuni.2018.03.023
   Torok S, 2015, BRIT J PHARMACOL, V172, P1148, DOI 10.1111/bph.12990
   Torok S, 2017, THERANOSTICS, V7, P400, DOI 10.7150/thno.16767
   Tringali C, 2014, BMC CANCER, V14, DOI 10.1186/1471-2407-14-560
   Tsao HS, 1997, CANCER, V79, P2361
   Tseng WW, 2011, IMMUNOL LETT, V139, P117, DOI 10.1016/j.imlet.2011.04.008
   Ubersax JA, 2007, NAT REV MOL CELL BIO, V8, P530, DOI 10.1038/nrm2203
   Van Raamsdonk CD, 2010, NEW ENGL J MED, V363, P2191, DOI 10.1056/NEJMoa1000584
   Vegvari A, 2011, 2011 SIN S CLIN TRAN, P36
   Vegvari A, 2017, CURR ANAL CHEM, V13, P182, DOI 10.2174/1573411012666160211235640
   Vegvari A, 2010, CHEM REV, V110, P3278, DOI 10.1021/cr100011x
   Vreman RA, 2019, CLIN PHARMACOL THER, V105, P684, DOI 10.1002/cpt.1251
   WASINGER VC, 1995, ELECTROPHORESIS, V16, P1090, DOI 10.1002/elps.11501601185
   Weisenberger DJ, 2014, J CLIN INVEST, V124, P17, DOI 10.1172/JCI69740
   Welinder C, 2017, PLOS ONE, V12, DOI 10.1371/journal.pone.0176167
   Wels C, 2011, J INVEST DERMATOL, V131, P1877, DOI 10.1038/jid.2011.142
   Wilkins MR, 1996, BIOTECHNOL GENET ENG, V13, P19, DOI 10.1080/02648725.1996.10647923
   Wisniewski JR, 2009, NAT METHODS, V6, P359, DOI [10.1038/NMETH.1322, 10.1038/nmeth.1322]
   Wong SL, 2005, ANN SURG ONCOL, V12, P282, DOI 10.1245/ASO.2005.05.016
   World Health Organization, 2017, SKIN CANC
   Yang YD, 2015, GENOM PROTEOM BIOINF, V13, P46, DOI 10.1016/j.gpb.2015.01.005
   Zhang MH, 2017, J PROTEOME RES, V16, P421, DOI 10.1021/acs.jproteome.6b00505
   Zhang SH, 2012, NUCLEIC ACIDS RES, V40, P9379, DOI 10.1093/nar/gks725
   Zhang SH, 2011, BIOINFORMATICS, V27, pI401, DOI 10.1093/bioinformatics/btr206
   Zhu YF, 2018, NAT COMMUN, V9, DOI 10.1038/s41467-018-03311-y
   Ziani L, 2017, ONCOTARGET, V8, P19780, DOI 10.18632/oncotarget.15540
NR 183
TC 23
Z9 24
U1 4
U2 11
PU SPRINGER
PI DORDRECHT
PA VAN GODEWIJCKSTRAAT 30, 3311 GZ DORDRECHT, NETHERLANDS
SN 0742-2091
EI 1573-6822
J9 CELL BIOL TOXICOL
JI Cell Biol. Toxicol.
PD AUG
PY 2019
VL 35
IS 4
BP 293
EP 332
DI 10.1007/s10565-019-09468-6
PG 40
WC Cell Biology; Toxicology
WE Science Citation Index Expanded (SCI-EXPANDED)
SC Cell Biology; Toxicology
GA KJ8LB
UT WOS:000512306100004
PM 30900145
OA Green Published, hybrid
DA 2022-04-10
ER

PT J
AU Reymond, MA
   Steinert, R
   Kahne, T
   Sagynaliev, E
   Allal, AS
   Lippert, H
AF Reymond, MA
   Steinert, R
   Kahne, T
   Sagynaliev, E
   Allal, AS
   Lippert, H
TI Expression and functional proteomics studies in colorectal cancer
SO PATHOLOGY RESEARCH AND PRACTICE
LA English
DT Review
DE colorectal cancer; colon; protein array analysis; proteomics; genomics
ID POLYACRYLAMIDE-GEL ELECTROPHORESIS; INTESTINAL EPITHELIAL-CELLS; NORMAL
   COLON MUCOSA; 2-DIMENSIONAL ELECTROPHORESIS; GENE-EXPRESSION; MATCHED
   SETS; BETA-CATENIN; HUMAN TUMORS; CARCINOMA; PROTEINS
AB Cell dysfunction results from multiple rather than from single gene interactions in the majority of colorectal cancers (CRC). Proteins, not mRNA, are the functional molecules in the cell, and the relationship between gene expression measured at the mRNA level and the corresponding protein level is not linear. Current proteomics tools allow for the determination of post-translational modification, and hence the presence of protein isoforms-some of them being disease-relevant. Thus, proteomics approaches are a welcome complement to traditional genetic approaches. In CRC, expression proteomics studies were carried out with colorectal cell lines, whole tissue biopsies, and purified epithelial cells. For CRC, two-dimensional electrophoresis reference maps, protein, and membrane protein databases are available on the internet. Functional proteomics studies have been performed to better understand signaling pathway, to characterize the molecular target of novel drugs, and to identify tumor-associated antigens in CRC. The increasing use of proteomics technologies, when addressing clinical problems, will accelerate the evolution towards personalized medicine in CRC. (C) 2004 Elsevier GmbH. All rights reserved.
C1 Univ Magdeburg, Dept Surg, D-39120 Magdeburg, Germany.
   Univ Magdeburg, Div Expt Med, Prote Res Unit, D-39120 Magdeburg, Germany.
   Univ Hosp Geneva, Div Radio Oncol, Geneva, Switzerland.
RP Reymond, MA (corresponding author), Univ Magdeburg, Dept Surg, Leipziger Str 44, D-39120 Magdeburg, Germany.
EM marc.reymond@medizin.uni-magdeburg.de
RI André, Reymond Marc/C-3259-2011; Kaehne, Thilo/E-4858-2012
OI André, Reymond Marc/0000-0001-5521-6237; 
CR Alaiya AA, 1999, ELECTROPHORESIS, V20, P1039, DOI 10.1002/(SICI)1522-2683(19990101)20:4/5<1039::AID-ELPS1039>3.0.CO;2-4
   ALLAL AS, IN PRESS PROTEOMICS
   Barcelo-Batllori S, 2002, PROTEOMICS, V2, P551, DOI 10.1002/1615-9861(200205)2:5<551::AID-PROT551>3.0.CO;2-O
   Bender FC, 2000, CANCER RES, V60, P5870
   Birkenkamp-Demtroder K, 2002, CANCER RES, V62, P4352
   Chen GA, 2002, MOL CELL PROTEOMICS, V1, P304, DOI 10.1074/mcp.M200008-MCP200
   Chen SL, 2003, MOL CARCINOGEN, V36, P204, DOI 10.1002/mc.10110
   Craven RA, 2002, AM J PATHOL, V160, P815, DOI 10.1016/S0002-9440(10)64904-8
   Emmert-Buck MR, 2000, MOL CARCINOGEN, V27, P158, DOI 10.1002/(SICI)1098-2744(200003)27:3<158::AID-MC2>3.0.CO;2-2
   Felley-Bosco E, 1999, ELECTROPHORESIS, V20, P3508, DOI 10.1002/(SICI)1522-2683(19991201)20:18<3508::AID-ELPS3508>3.0.CO;2-7
   Felley-Bosco E, 2002, BIOL RES, V35, P169, DOI 10.4067/S0716-97602002000200007
   FRANZEN B, 1995, ELECTROPHORESIS, V16, P1087, DOI 10.1002/elps.11501601184
   JI H, 1993, J BIOL CHEM, V268, P13396
   JI H, 1994, ELECTROPHORESIS, V15, P391, DOI 10.1002/elps.1150150158
   Lawrie LC, 2001, LANCET ONCOL, V2, P270, DOI 10.1016/S1470-2045(00)00321-1
   Le Naour F, 2002, TECHNOL CANCER RES T, V1, P257, DOI 10.1177/153303460200100406
   Morin PJ, 1997, SCIENCE, V275, P1787, DOI 10.1126/science.275.5307.1787
   Muro S, 2003, GENOME BIOL, V4, DOI 10.1186/gb-2003-4-3-r21
   Ott V., 2001, Pharmacogenomics Journal, V1, P142
   Resing KA, 2002, ANN NY ACAD SCI, V971, P608, DOI 10.1111/j.1749-6632.2002.tb04537.x
   Reymond MA, 1997, ELECTROPHORESIS, V18, P2842, DOI 10.1002/elps.1150181520
   Sasatomi T, 2002, CANCER, V94, P1636, DOI 10.1002/cncr.10421
   Seike M, 2003, CANCER RES, V63, P4641
   Simpson RJ, 2000, ELECTROPHORESIS, V21, P1707, DOI 10.1002/(SICI)1522-2683(20000501)21:9<1707::AID-ELPS1707>3.0.CO;2-Q
   Soravia C, 1998, AM J HUM GENET, V62, P1290, DOI 10.1086/301883
   Steinert R, 2002, TECHNOL CANCER RES T, V1, P297, DOI 10.1177/153303460200100411
   Stremmel C, 2002, INT J COLORECTAL DIS, V17, P131, DOI 10.1007/s00384-001-0370-7
   Stulik J, 2001, ELECTROPHORESIS, V22, P3019, DOI 10.1002/1522-2683(200108)22:14<3019::AID-ELPS3019>3.0.CO;2-T
   Stulik J, 1999, ELECTROPHORESIS, V20, P3638, DOI 10.1002/(SICI)1522-2683(19991201)20:18<3638::AID-ELPS3638>3.0.CO;2-W
   Stulik J, 1999, ELECTROPHORESIS, V20, P1047, DOI 10.1002/(SICI)1522-2683(19990101)20:4/5<1047::AID-ELPS1047>3.0.CO;2-E
   Szymczyk P, 1996, TUMORI, V82, P376, DOI 10.1177/030089169608200416
   Takahashi K, 1996, J BIOL CHEM, V271, P9490, DOI 10.1074/jbc.271.16.9490
   VENNEN H, BACKGROUND INFORMATI
   VILLANUEVA J, 2003, P SWISS PROT SOC 200
   WARD LD, 1990, ELECTROPHORESIS, V11, P883, DOI 10.1002/elps.1150111019
   Weinberg RA, 1996, CELL, V85, P457, DOI 10.1016/S0092-8674(00)81244-1
   Wright George L Jr, 2002, Expert Rev Mol Diagn, V2, P549, DOI 10.1586/14737159.2.6.549
NR 37
TC 13
Z9 13
U1 0
U2 5
PU ELSEVIER GMBH, URBAN & FISCHER VERLAG
PI JENA
PA OFFICE JENA, P O BOX 100537, 07705 JENA, GERMANY
SN 0344-0338
J9 PATHOL RES PRACT
JI Pathol. Res. Pract.
PY 2004
VL 200
IS 2
BP 119
EP 127
DI 10.1016/j.prp.2004.02.001
PG 9
WC Pathology
WE Science Citation Index Expanded (SCI-EXPANDED)
SC Pathology
GA 825ZO
UT WOS:000221798300006
PM 15237920
DA 2022-04-10
ER

PT J
AU Favia, A
   Salvatori, L
   Nanni, S
   Iwamoto-Stohl, LK
   Valente, S
   Mai, A
   Scagnoli, F
   Fontanella, RA
   Totta, P
   Nasi, S
   Illi, B
AF Favia, Annarita
   Salvatori, Luisa
   Nanni, Simona
   Iwamoto-Stohl, Lisa K.
   Valente, Sergio
   Mai, Antonello
   Scagnoli, Fiorella
   Fontanella, Rosaria Anna
   Totta, Pierangela
   Nasi, Sergio
   Illi, Barbara
TI The Protein Arginine Methyltransferases 1 and 5 affect Myc properties in
   glioblastoma stem cells
SO SCIENTIFIC REPORTS
LA English
DT Article
ID C-MYC; EMBRYONIC STEM; METHYLATION; PRMT5; TRANSCRIPTION; DIMETHYLATION;
   EXPRESSION; GOVERNS; PATHWAY; BINDING
AB Protein Arginine (R) methylation is the most common post-translational methylation in mammalian cells. Protein Arginine Methyltransferases (PRMT) 1 and 5 dimethylate their substrates on R residues, asymmetrically and symmetrically, respectively. They are ubiquitously expressed and play fundamental roles in tumour malignancies, including glioblastoma multiforme (GBM) which presents largely deregulated Myc activity. Previously, we demonstrated that PRMT5 associates with Myc in GBM cells, modulating, at least in part, its transcriptional properties. Here we show that Myc/PRMT5 protein complex includes PRMT1, in both HEK293T and glioblastoma stem cells (GSCs). We demonstrate that Myc is both asymmetrically and symmetrically dimethylated by PRMT1 and PRMT5, respectively, and that these modifications differentially regulate its stability. Moreover, we show that the ratio between symmetrically and asymmetrically dimethylated Myc changes in GSCs grown in stem versus differentiating conditions. Finally, both PRMT1 and PRMT5 activity modulate Myc binding at its specific target promoters. To our knowledge, this is the first work reporting R asymmetrical and symmetrical dimethylation as novel Myc post-translational modification, with different functional properties. This opens a completely unexplored field of investigation in Myc biology and suggests symmetrically dimethylated Myc species as novel diagnostic and prognostic markers and druggable therapeutic target for GBM.
C1 [Favia, Annarita; Salvatori, Luisa; Scagnoli, Fiorella; Fontanella, Rosaria Anna; Nasi, Sergio; Illi, Barbara] CNR, IBPM, Rome, Italy.
   [Nanni, Simona] Univ Cattolica Sacro Cuore, Inst Med Pathol, Rome, Italy.
   [Nanni, Simona] Fdn Policlin Univ A Gemelli IRCCS, Rome, Italy.
   [Iwamoto-Stohl, Lisa K.] Univ Cambridge, Cambridge, England.
   [Valente, Sergio; Mai, Antonello] Sapienza Univ Rome, Dept Chem & Technol Drugs, Rome, Italy.
   [Mai, Antonello] Sapienza Univ Rome, Inst Pasteur, Cenci Bolognetti Fdn, Rome, Italy.
   [Scagnoli, Fiorella] Sapienza Univ Rome, Dept Biol & Biotechnol Charles Darwin, Rome, Italy.
   [Totta, Pierangela] Futura Stem Cells Srl, Rome, Italy.
RP Salvatori, L; Illi, B (corresponding author), CNR, IBPM, Rome, Italy.
EM luisa.salvatori@cnr.it; barbara.illi@cnr.it
RI Salvatori, Luisa/AAK-9365-2021; Illi, Barbara/AAY-8650-2020; VALENTE,
   Sergio/K-2198-2016
OI Scagnoli, Fiorella/0000-0002-7433-3655; VALENTE,
   Sergio/0000-0002-2241-607X; Totta, Pierangela/0000-0001-7826-4733; Mai,
   Antonello/0000-0001-9176-2382
FU AIRC IG grantFondazione AIRC per la ricerca sul cancro [15927]
FX We thank Dr. Andrea Levi who provided the PRMT5-6myc plasmid and Dr.
   Daniela Annibali for supplying the KRABshMyc lentivirus. This work has
   been supported by AIRC IG grant 15927 to B.I.
CR Altan B, 2016, GASTRIC CANCER, V19, P789, DOI 10.1007/s10120-015-0551-7
   Banasavadi-Siddegowda YK, 2017, ONCOGENE, V36, P263, DOI 10.1038/onc.2016.199
   Banasavadi-Siddegowda YK, 2018, NEURO-ONCOLOGY, V20, P753, DOI 10.1093/neuonc/nox206
   Bedford MT, 2009, MOL CELL, V33, P1, DOI 10.1016/j.molcel.2008.12.013
   Blanc RS, 2017, MOL CELL BIOL, V37, DOI 10.1128/MCB.00457-16
   Chittka A, 2012, J BIOL CHEM, V287, P42995, DOI 10.1074/jbc.M112.392746
   Dacwag CS, 2007, MOL CELL BIOL, V27, P384, DOI 10.1128/MCB.01528-06
   De Bacco F, 2012, CANCER RES, V72, P4537, DOI 10.1158/0008-5472.CAN-11-3490
   Eberhardt A, 2016, ONCOTARGET, V7, P63629, DOI 10.18632/oncotarget.11556
   Eilers M, 2008, GENE DEV, V22, P2755, DOI 10.1101/gad.1712408
   Faiola F, 2005, MOL CELL BIOL, V25, P10220, DOI 10.1128/MCB.25.23.10220-10234.2005
   Galardi S, 2016, EMBO REP, V17, P1872, DOI 10.15252/embr.201541489
   Gomes LR, 2017, AUTOPHAGY, V13, P928, DOI 10.1080/15548627.2017.1293767
   Han XS, 2014, J NEURO-ONCOL, V118, P61, DOI 10.1007/s11060-014-1419-0
   Honda M, 2017, J NEUROCHEM, V142, P901, DOI 10.1111/jnc.14123
   Infantino S, 2017, NAT COMMUN, V8, DOI 10.1038/s41467-017-01009-1
   Kim JY, 2013, P NATL ACAD SCI USA, V110, P6418, DOI 10.1073/pnas.1221799110
   Kim J, 2010, CELL, V143, P313, DOI 10.1016/j.cell.2010.09.010
   Kupp R, 2016, CELL REP, V16, P2838, DOI 10.1016/j.celrep.2016.08.040
   Lacroix M, 2008, EMBO REP, V9, P452, DOI 10.1038/embor.2008.45
   Li XG, 2010, BLOOD, V115, P2028, DOI 10.1182/blood-2009-07-236059
   Lin CY, 2012, CELL, V151, P56, DOI 10.1016/j.cell.2012.08.026
   Luo H, 2015, BRAIN, V138, P3654, DOI 10.1093/brain/awv287
   Madreiter-Sokolowski CT, 2017, ONCOTARGET, V8, P80278, DOI 10.18632/oncotarget.20571
   Mai A, 2007, CHEMMEDCHEM, V2, P987, DOI 10.1002/cmdc.200700023
   Migliori V, 2012, NAT STRUCT MOL BIOL, V19, P136, DOI 10.1038/nsmb.2209
   Mongiardi MP, 2015, SCI REP-UK, V5, DOI 10.1038/srep15494
   Nagamatsu G, 2011, J BIOL CHEM, V286, P10641, DOI 10.1074/jbc.M110.216390
   Nanni S, 2009, J CLIN INVEST, V119, P1093, DOI 10.1172/JCI35079
   Nicholson TB, 2009, PHARMACOL RES, V60, P466, DOI 10.1016/j.phrs.2009.07.006
   Nie ZQ, 2012, CELL, V151, P68, DOI 10.1016/j.cell.2012.08.033
   ORIAN JM, 1992, BRIT J CANCER, V66, P106, DOI 10.1038/bjc.1992.225
   Panicker SP, 2010, ONCOTARGET, V1, P289
   Park JH, 2015, MOL ONCOL, V9, P617, DOI 10.1016/j.molonc.2014.10.015
   Piccirillo SGM, 2007, EXPERT OPIN BIOL TH, V7, P1129, DOI 10.1517/14712598.7.8.1129
   Preusser M, 2011, ANN NEUROL, V70, P9, DOI 10.1002/ana.22425
   Rabellino A, 2016, CELL REP, V15, P2266, DOI 10.1016/j.celrep.2016.05.015
   Reintjes A, 2016, P NATL ACAD SCI USA, V113, P4326, DOI 10.1073/pnas.1522372113
   Takai H, 2014, CELL REP, V9, P48, DOI 10.1016/j.celrep.2014.08.071
   Tikhanovich I, 2017, J BIOL CHEM, V292, P13333, DOI 10.1074/jbc.M117.797928
   Wang Y, 2016, CANCER RES, V76, P7049, DOI 10.1158/0008-5472.CAN-16-0715
   Wei H, 2013, P NATL ACAD SCI USA, V110, P13516, DOI 10.1073/pnas.1311784110
   Wu Q, 2009, STEM CELLS, V27, P2637, DOI 10.1002/stem.131
   Zhang YL, 2018, EXP CELL RES, V362, P43, DOI 10.1016/j.yexcr.2017.10.035
   Zhao K, 2017, CANCER LETT, V406, P12, DOI 10.1016/j.canlet.2017.07.022
   Zheng SS, 2013, MOL CELL, V52, P37, DOI 10.1016/j.molcel.2013.08.039
NR 46
TC 15
Z9 15
U1 1
U2 5
PU NATURE PUBLISHING GROUP
PI LONDON
PA MACMILLAN BUILDING, 4 CRINAN ST, LONDON N1 9XW, ENGLAND
SN 2045-2322
J9 SCI REP-UK
JI Sci Rep
PD NOV 4
PY 2019
VL 9
AR 15925
DI 10.1038/s41598-019-52291-6
PG 13
WC Multidisciplinary Sciences
WE Science Citation Index Expanded (SCI-EXPANDED)
SC Science & Technology - Other Topics
GA JJ1CM
UT WOS:000493898100033
PM 31685892
OA Green Published, gold
DA 2022-04-10
ER

PT J
AU Vardabasso, C
   Hasson, D
   Ratnakumar, K
   Chung, CY
   Duarte, LF
   Bernstein, E
AF Vardabasso, Chiara
   Hasson, Dan
   Ratnakumar, Kajan
   Chung, Chi-Yeh
   Duarte, Luis F.
   Bernstein, Emily
TI Histone variants: emerging players in cancer biology
SO CELLULAR AND MOLECULAR LIFE SCIENCES
LA English
DT Review
DE Histone variants; Histone chaperones; Histone post-translational
   modifications; Cancer; Chromatin remodeler
ID DNA-DAMAGE-RESPONSE; CENTROMERE PROTEIN-A; GENE-EXPRESSION PROFILES;
   INACTIVE X-CHROMOSOME; NUCLEOSOME CORE PARTICLE; DOUBLE-STRAND BREAKS;
   CENP-A; CELL-CYCLE; H2A VARIANT; CRYSTAL-STRUCTURE
AB Histone variants are key players in shaping chromatin structure, and, thus, in regulating fundamental cellular processes such as chromosome segregation and gene expression. Emerging evidence points towards a role for histone variants in contributing to tumor progression, and, recently, the first cancer-associated mutation in a histone variant-encoding gene was reported. In addition, genetic alterations of the histone chaperones that specifically regulate chromatin incorporation of histone variants are rapidly being uncovered in numerous cancers. Collectively, these findings implicate histone variants as potential drivers of cancer initiation and/or progression, and, therefore, targeting histone deposition or the chromatin remodeling machinery may be of therapeutic value. Here, we review the mammalian histone variants of the H2A and H3 families in their respective cellular functions, and their involvement in tumor biology.
C1 [Vardabasso, Chiara; Hasson, Dan; Ratnakumar, Kajan; Chung, Chi-Yeh; Duarte, Luis F.; Bernstein, Emily] Icahn Sch Med Mt Sinai, Dept Oncol Sci, New York, NY 10029 USA.
   [Vardabasso, Chiara; Duarte, Luis F.; Bernstein, Emily] Icahn Sch Med Mt Sinai, Dept Dermatol, New York, NY 10029 USA.
   [Hasson, Dan; Ratnakumar, Kajan; Chung, Chi-Yeh; Duarte, Luis F.] Icahn Sch Med Mt Sinai, Grad Sch Biomed Sci, New York, NY 10029 USA.
RP Bernstein, E (corresponding author), Icahn Sch Med Mt Sinai, Dept Oncol Sci, 1425 Madison Ave, New York, NY 10029 USA.
EM emily.bernstein@mssm.edu
FU NCIUnited States Department of Health & Human ServicesNational
   Institutes of Health (NIH) - USANIH National Cancer Institute (NCI)
   [T32-CA078207]; Melanoma Research Development Award (Department of
   Dermatology, Mount Sinai); Ellison Medical Foundation New Scholar
   AwardLawrence Ellison Foundation; Association for International Cancer
   Research, Hirschl/Weill-Caulier Research Award; NCI/NIHUnited States
   Department of Health & Human ServicesNational Institutes of Health (NIH)
   - USANIH National Cancer Institute (NCI) [R01CA154683]; NATIONAL CANCER
   INSTITUTEUnited States Department of Health & Human ServicesNational
   Institutes of Health (NIH) - USANIH National Cancer Institute (NCI)
   [T32CA078207, R01CA154683] Funding Source: NIH RePORTER
FX The authors thank Zulekha Qadeer and Alexandre Gaspar-Maia for
   critically reading this manuscript. The authors thank Matthew O'Connell
   for microscopy assistance and Pablo DeIoannes for assistance with in
   silico homology modeling. This work is supported by an NCI T32-CA078207
   to L.F.D, a Melanoma Research Development Award (Department of
   Dermatology, Mount Sinai) to C.V., and The Ellison Medical Foundation
   New Scholar Award, Association for International Cancer Research,
   Hirschl/Weill-Caulier Research Award and NCI/NIH R01CA154683 to E.B.
CR Ahmad K, 2002, MOL CELL, V9, P1191, DOI 10.1016/S1097-2765(02)00542-7
   ALBIG W, 1995, GENOMICS, V30, P264, DOI 10.1006/geno.1995.9878
   ALLIS CD, 1986, J BIOL CHEM, V261, P1941
   ALLIS CD, 1980, CELL, V20, P609, DOI 10.1016/0092-8674(80)90307-4
   Andrews AJ, 2011, ANNU REV BIOPHYS, V40, P99, DOI 10.1146/annurev-biophys-042910-155329
   Angelov D, 2004, EMBO J, V23, P3815, DOI 10.1038/sj.emboj.7600400
   Angelov D, 2003, MOL CELL, V11, P1033, DOI 10.1016/S1097-2765(03)00100-X
   Arnaldi LAT, 2005, THYROID, V15, P210, DOI 10.1089/thy.2005.15.210
   Banaszynski LA, 2010, DEV CELL, V19, P662, DOI 10.1016/j.devcel.2010.10.014
   Barnhart MC, 2011, J CELL BIOL, V194, P229, DOI 10.1083/jcb.201012017
   Barski A, 2007, CELL, V129, P823, DOI 10.1016/j.cell.2007.05.009
   Bassett EA, 2012, DEV CELL, V22, P749, DOI 10.1016/j.devcel.2012.02.001
   Bassing CH, 2003, CELL, V114, P359, DOI 10.1016/S0092-8674(03)00566-X
   Bassing CH, 2002, P NATL ACAD SCI USA, V99, P8173, DOI 10.1073/pnas.122228699
   Bernstein E, 2008, P NATL ACAD SCI USA, V105, P1533, DOI 10.1073/pnas.0711632105
   Bernstein E, 2006, BIOCHEM CELL BIOL, V84, P505, DOI 10.1139/O06-085
   Berube NG, 2000, HUM MOL GENET, V9, P539, DOI 10.1093/hmg/9.4.539
   Bianco-Miotto T, 2010, CANCER EPIDEM BIOMAR, V19, P2611, DOI 10.1158/1055-9965.EPI-10-0555
   Biermann K, 2007, ANTICANCER RES, V27, P3091
   Black BE, 2007, P NATL ACAD SCI USA, V104, P5008, DOI 10.1073/pnas.0700390104
   Black BE, 2007, MOL CELL, V25, P309, DOI 10.1016/j.molcel.2006.12.018
   Black B, 2011, CELL, V144, P471, DOI 10.1016/j.cell.2011.02.002
   Bonisch C, 2012, NUCLEIC ACIDS RES, V40, P10719, DOI 10.1093/nar/gks865
   Bonisch C, 2012, NUCLEIC ACIDS RES, V40, P5951, DOI 10.1093/nar/gks267
   Bonner WM, 2008, NAT REV CANCER, V8, P957, DOI 10.1038/nrc2523
   Boulard M, 2010, EPIGENET CHROMATIN, V3, DOI 10.1186/1756-8935-3-8
   Brickner DG, 2007, PLOS BIOL, V5, P704, DOI 10.1371/journal.pbio.0050081
   Bruce K, 2005, NUCLEIC ACIDS RES, V33, P5633, DOI 10.1093/nar/gki874
   Bui M, 2012, CELL, V150, P317, DOI 10.1016/j.cell.2012.05.035
   Burma S, 2001, J BIOL CHEM, V276, P42462, DOI 10.1074/jbc.C100466200
   Buschbeck M, 2010, EPIGENETICS-US, V5, P118, DOI 10.4161/epi.5.2.11076
   Buschbeck M, 2009, NAT STRUCT MOL BIOL, V16, P1074, DOI 10.1038/nsmb.1665
   Cai Y, 2005, J BIOL CHEM, V280, P13665, DOI 10.1074/jbc.M500001200
   CARR AM, 1994, MOL GEN GENET, V245, P628, DOI 10.1007/BF00282226
   Carroll CW, 2009, NAT CELL BIOL, V11, P896, DOI 10.1038/ncb1899
   Celeste A, 2002, SCIENCE, V296, P922, DOI 10.1126/science.1069398
   Celeste A, 2003, CELL, V114, P371, DOI 10.1016/S0092-8674(03)00567-1
   Chakravarthy S, 2005, MOL CELL BIOL, V25, P7616, DOI 10.1128/MCB.25.17.7616-7624.2005
   Chakravarthy S, 2012, NUCLEIC ACIDS RES, V40, P8285, DOI 10.1093/nar/gks645
   Chan HM, 2005, GENE DEV, V19, P196, DOI 10.1101/gad.1280205
   Chang EY, 2008, BIOCHEMISTRY-US, V47, P13726, DOI 10.1021/bi8016944
   Changolkar LN, 2008, MOL CELL BIOL, V28, P2059, DOI 10.1128/MCB.01362-07
   Changolkar LN, 2007, MOL CELL BIOL, V27, P2758, DOI 10.1128/MCB.02334-06
   Changolkar LN, 2010, MOL CELL BIOL, V30, P5473, DOI 10.1128/MCB.00518-10
   Changolkar LN, 2002, BIOCHEMISTRY-US, V41, P179, DOI 10.1021/bi0157417
   Choo JH, 2006, HUM MOL GENET, V15, P717, DOI 10.1093/hmg/ddi485
   Chow CM, 2005, EMBO REP, V6, P354, DOI 10.1038/sj.embor.7400366
   Chu FX, 2006, MOL CELL PROTEOMICS, V5, P194, DOI 10.1074/mcp.M500285-MCP200
   Collado M, 2005, NATURE, V436, P642, DOI 10.1038/436642a
   Conerly ML, 2010, GENOME RES, V20, P1383, DOI 10.1101/gr.106542.110
   Cook PJ, 2009, NATURE, V458, P591, DOI 10.1038/nature07849
   Coon JJ, 2005, P NATL ACAD SCI USA, V102, P9463, DOI 10.1073/pnas.0503189102
   Costanzi C, 1998, NATURE, V393, P599, DOI 10.1038/31275
   Costanzi C, 2001, J BIOL CHEM, V276, P21776, DOI 10.1074/jbc.M010919200
   Couldrey C, 1999, HUM MOL GENET, V8, P2489, DOI 10.1093/hmg/8.13.2489
   Creppe C, 2012, MOL CELL BIOL, V32, P1442, DOI 10.1128/MCB.06323-11
   Creyghton MP, 2008, CELL, V135, P649, DOI 10.1016/j.cell.2008.09.056
   Csankovszki G, 1999, NAT GENET, V22, P323, DOI 10.1038/11887
   Cui BW, 2006, MOL CELL BIOL, V26, P7719, DOI 10.1128/MCB.01139-06
   Dai B, 2007, STEM CELLS, V25, P2567, DOI 10.1634/stemcells.2007-0131
   Dalal Y, 2007, PLOS BIOL, V5, P1798, DOI 10.1371/journal.pbio.0050218
   Dardenne E, 2012, NAT STRUCT MOL BIOL, V19, P1139, DOI 10.1038/nsmb.2390
   Das C., 2011, BIOCHIM BIOPHYS ACTA, V1819, P332
   Das C, 2010, TRENDS BIOCHEM SCI, V35, P476, DOI 10.1016/j.tibs.2010.04.001
   Dimitriadis EK, 2010, P NATL ACAD SCI USA, V107, P20317, DOI 10.1073/pnas.1009563107
   Doil C, 2009, CELL, V136, P435, DOI 10.1016/j.cell.2008.12.041
   Doyen CM, 2006, MOL CELL BIOL, V26, P1156, DOI 10.1128/MCB.26.3.1156-1164.2006
   Draker R, 2012, PLOS GENET, V8, DOI 10.1371/journal.pgen.1003047
   Draker R, 2011, NUCLEIC ACIDS RES, V39, P3529, DOI 10.1093/nar/gkq1352
   Drane P, 2010, GENE DEV, V24, P1253, DOI 10.1101/gad.566910
   Dryhurst D, 2012, CANCER LETT, V315, P38, DOI 10.1016/j.canlet.2011.10.003
   Dryhurst D, 2009, BMC BIOL, V7, DOI 10.1186/1741-7007-7-86
   Dunican DS, 2002, ONCOGENE, V21, P3253, DOI 10.1038/sj.onc.1205431
   Dunleavy EM, 2011, NUCLEUS-PHILA, V2, P146, DOI 10.4161/nucl.2.2.15211
   Dunleavy EM, 2009, CELL, V137, P485, DOI 10.1016/j.cell.2009.02.040
   Dutta D, 2010, J BIOL CHEM, V285, P41567, DOI 10.1074/jbc.M110.190025
   Eirin-Lopez JM, 2009, BMC EVOL BIOL, V9, DOI 10.1186/1471-2148-9-31
   Elsasser SJ, 2012, NATURE, V491, P560, DOI 10.1038/nature11608
   Elsaesser SJ, 2010, CURR OPIN GENET DEV, V20, P110, DOI 10.1016/j.gde.2010.01.003
   Faast R, 2001, CURR BIOL, V11, P1183, DOI 10.1016/S0960-9822(01)00329-3
   Fernandez-Capetillo O, 2003, DEV CELL, V4, P497, DOI 10.1016/S1534-5807(03)00093-5
   Fernandez-Capetillo O, 2004, DNA REPAIR, V3, P959, DOI 10.1016/j.dnarep.2004.03.024
   Fernandez-Capetillo O, 2003, CELL CYCLE, V2, P426, DOI 10.4161/cc.2.5.509
   Firestein R, 2008, NATURE, V455, P547, DOI 10.1038/nature07179
   Foltz DR, 2009, CELL, V137, P472, DOI 10.1016/j.cell.2009.02.039
   Foltz DR, 2006, NAT CELL BIOL, V8, P458, DOI 10.1038/ncb1397
   Frank D, 2003, GENE, V312, P135, DOI 10.1016/S0378-1119(03)00609-7
   Friedmann-Morvinski D, 2012, SCIENCE, V338, P1080, DOI 10.1126/science.1226929
   Fuchs M, 2001, CELL, V106, P297, DOI 10.1016/S0092-8674(01)00450-0
   Fujita Y, 2007, DEV CELL, V12, P17, DOI 10.1016/j.devcel.2006.11.002
   Fullgrabe J, 2011, ONCOGENE, V30, P3391, DOI 10.1038/onc.2011.121
   Gamble MJ, 2010, CELL CYCLE, V9, P2568, DOI 10.4161/cc.9.13.12144
   Gamble MJ, 2010, GENE DEV, V24, P21, DOI 10.1101/gad.1876110
   Gevry N, 2007, GENE DEV, V21, P1869, DOI 10.1101/gad.1545707
   Gevry N, 2009, GENE DEV, V23, P1522, DOI 10.1101/gad.1787109
   Gibbons RJ, 2003, NAT GENET, V34, P446, DOI 10.1038/ng1213
   Goldberg AD, 2010, CELL, V140, P678, DOI 10.1016/j.cell.2010.01.003
   Gorrini C, 2007, NATURE, V448, P1063, DOI 10.1038/nature06055
   Graber MW, 1996, ANN SURG ONCOL, V3, P192, DOI 10.1007/BF02305800
   Greaves IK, 2007, P NATL ACAD SCI USA, V104, P525, DOI 10.1073/pnas.0607870104
   Guerra C, 2003, CANCER CELL, V4, P111, DOI 10.1016/S1535-6108(03)00191-0
   Guillemette B, 2005, PLOS BIOL, V3, P2100, DOI 10.1371/journal.pbio.0030384
   Hake SB, 2006, P NATL ACAD SCI USA, V103, P6428, DOI 10.1073/pnas.0600803103
   Hake SB, 2006, J BIOL CHEM, V281, P559, DOI 10.1074/jbc.M509266200
   Han WD, 2011, MUTAT RES-REV MUTAT, V727, P86, DOI 10.1016/j.mrrev.2011.03.001
   Hasson D, 2013, NAT STRUCT IN PRESS
   Heaphy CM, 2011, SCIENCE, V333, P425, DOI 10.1126/science.1207313
   Heo K, 2008, MOL CELL, V30, P86, DOI 10.1016/j.molcel.2008.02.029
   Hernadez-Munoz I, 2005, P NATL ACAD SCI USA, V102, P7635, DOI 10.1073/pnas.0408918102
   Heyn H, 2012, NAT REV GENET, V13, P679, DOI 10.1038/nrg3270
   Hodl M, 2009, CURR BIOL, V19, P1221, DOI 10.1016/j.cub.2009.05.048
   Hollenbach AD, 2002, J CELL SCI, V115, P3319
[truncated: 4,781,935 more chars]
