# Supplementary material for: The Global research of protein post-translational modifications in the cancer field: A bibliometric and visualized study
Source: Frontiers journal article supplement (doi:10.3389/fonc.2022.978464), 2022-11-03
Supplement: Data_Sheet_1.zip [file Editorial 3.DOC]

FN Clarivate Analytics Web of Science
VR 1.0
PT J
AU Gonzalez-Prieto, R
   Cuijpers, SAG
   Kumar, R
   Hendriks, IA
   Vertegaal, ACO
AF Gonzalez-Prieto, Roman
   Cuijpers, Sabine A. G.
   Kumar, Ramesh
   Hendriks, Ivo A.
   Vertegaal, Alfred C. O.
TI c-Myc is targeted to the proteasome for degradation in a
   SUMOylation-dependent manner, regulated by PIAS1, SENP7 and RNF4
SO CELL CYCLE
LA English
DT Article
DE c-Myc; PIAS1; proteasome; SUMO; RNF4; SENP7
ID UBIQUITIN-LIKE PROTEIN; NEDD8-ACTIVATING ENZYME; SIGNALING NETWORKS;
   sumoylationMODIFICATION; PML DEGRADATION; CANCER-THERAPY; DRUG target;
   IN-VIVO; IDENTIFICATION; LIGASE
AB c-Myc is the most frequently overexpressed oncogene in tumors, including breast cancer, colon cancer and lung cancer. post-translational modification comprising phosphorylation, acetylation and ubiquitination regulate the activity of c-Myc. Recently, it was shown that c-Myc-driven tumors are strongly dependent on the sumoylationpathway. Currently, the relevant sumoylationtarget proteins in this pathway are unknown. Here we show that c-Myc is a target protein for SUMOylation, and that SUMOylated c-Myc is subsequently ubiquitylated and degraded by the proteasome. sumoylationchains appeared to be dispensable for this process, polymerization-deficient sumoylationmutants supported proteolysis of SUMOylated c-Myc. These results indicate that multiple sumoylationmonomers conjugated to c-Myc could be sufficient to direct SUMOylated c-Myc to the ubiquitin-proteasome pathway. Knocking down the SUMO-targeted ubiquitinationligase RNF4 enhanced the levels of SUMOylated c-Myc, indicating that RNF4 could recognize a multi-SUMOylated protein as a substrate in addition to poly-SUMOylated proteins. Knocking down the sumoylationE3 ligase PIAS1 resulted in reduced c-Myc SUMOylation and increased c-Myc transcriptional regulation, indicating that PIAS1 mediates c-Myc SUMOylation. Increased SUMOylation of c-Myc was noted upon knockdown of the sumoylationprotease SENP7, indicating that it also could regulate a multi-SUMOylated protein in addition to poly-SUMOylated proteins. C-Myc lacks KxE-type SUMOylation consensus motifs. We used mass spectrometry to identify 10 sumoylationacceptor lysines: K52, K148, K157, K317, K323, K326, K389, K392, K398 and K430. Intriguingly, mutating all 10 sumoylationacceptor lysines did not reduce c-Myc SUMOylation, suggesting that sumoylationacceptor lysines in c-Myc act promiscuously. Our results provide novel insight into the complexity of c-Myc post-translational regulation.
C1 [Gonzalez-Prieto, Roman; Cuijpers, Sabine A. G.; Kumar, Ramesh; Hendriks, Ivo A.; Vertegaal, Alfred C. O.] Leiden Univ, Med Ctr, Dept Mol Cell Biol, Leiden, Netherlands.
RP Vertegaal, ACO (corresponding author), Leiden Univ, Med Ctr, Dept Mol Cell Biol, Leiden, Netherlands.
EM vertegaal@lumc.nl
RI González-Prieto, Román/O-4132-2014; Vertegaal, Alfred/ABG-8141-2021;
   Vertegaal, Alfred CO/Y-3875-2018
OI González-Prieto, Román/0000-0001-8997-2321; Vertegaal,
   Alfred/0000-0002-7989-0493; Vertegaal, Alfred CO/0000-0002-7989-0493;
   Hendriks, Ivo/0000-0002-1439-3701
FU Netherlands Organization for Scientific Research (NWO)Netherlands
   Organization for Scientific Research (NWO); European Research Council
   (ACOV)
FX This work was supported by the Netherlands Organization for Scientific
   Research (NWO) and the European Research Council (ACOV).
CR Alegre KO, 2014, PROTEIN SCI, V23, P433, DOI 10.1002/pro.2425
   ALITALO K, 1983, NATURE, V306, P274, DOI 10.1038/306274a0
   Becker J, 2013, NAT STRUCT MOL BIOL, V20, P525, DOI 10.1038/nsmb.2526
   Bedford L, 2011, NAT REV DRUG DISCOV, V10, P29, DOI 10.1038/nrd3321
   Beroukhim R, 2010, NATURE, V463, P899, DOI 10.1038/nature08822
   Cohen P, 2010, CELL, V143, P686, DOI 10.1016/j.cell.2010.11.016
   COLBY WW, 1983, NATURE, V301, P722, DOI 10.1038/301722a0
   COLLINS S, 1982, NATURE, V298, P679, DOI 10.1038/298679a0
   Danielsen JMR, 2011, MOL CELL PROTEOMICS, V10, DOI 10.1074/mcp.M110.003590
   Erker Y, 2013, MOL CELL BIOL, V33, P2163, DOI 10.1128/MCB.01019-12
   Flotho A, 2013, ANNU REV BIOCHEM, V82, P357, DOI 10.1146/annurev-biochem-061909-093311
   Gareau JR, 2010, NAT REV MOL CELL BIO, V11, P861, DOI 10.1038/nrm3011
   Gill G, 2005, CURR OPIN GENET DEV, V15, P536, DOI 10.1016/j.gde.2005.07.004
   Golebiowski F, 2009, SCI SIGNAL, V2, DOI 10.1126/scisignal.2000282
   HEIKKILA R, 1987, NATURE, V328, P445, DOI 10.1038/328445a0
   Hendriks IA, 2014, NAT STRUCT MOL BIOL, V21, P927, DOI 10.1038/nsmb.2890
   Hermeking H, 2000, P NATL ACAD SCI USA, V97, P2229, DOI 10.1073/pnas.050586197
   Hickey CM, 2012, NAT REV MOL CELL BIO, V13, P755, DOI 10.1038/nrm3478
   Hietakangas V, 2006, P NATL ACAD SCI USA, V103, P45, DOI 10.1073/pnas.0503698102
   Hochstrasser M, 2001, CELL, V107, P5, DOI 10.1016/S0092-8674(01)00519-0
   HOU D, 1994, J BIOL CHEM, V269, P14244
   Kessler JD, 2012, SCIENCE, V335, P348, DOI 10.1126/science.1212728
   King RW, 1996, MOL BIOL CELL, V7, P1343, DOI 10.1091/mbc.7.9.1343
   Lallemand-Breitenbach V, 2008, NAT CELL BIOL, V10, P547, DOI 10.1038/ncb1717
   Lima CD, 2008, J BIOL CHEM, V283, P32045, DOI 10.1074/jbc.M805655200
   Luo J, 2009, CELL, V136, P823, DOI 10.1016/j.cell.2009.02.024
   LUTTERBACH B, 1994, MOL CELL BIOL, V14, P5510, DOI 10.1128/MCB.14.8.5510
   Matic I, 2010, MOL CELL, V39, P641, DOI 10.1016/j.molcel.2010.07.026
   Mattiroli F, 2014, NAT STRUCT MOL BIOL, V21, P308, DOI 10.1038/nsmb.2792
   Meulmeester E, 2003, MOL CELL BIOL, V23, P4929, DOI 10.1128/MCB.23.14.4929-4938.2003
   Mukhopadhyay D, 2007, TRENDS BIOCHEM SCI, V32, P286, DOI 10.1016/j.tibs.2007.05.002
   Nawrocki ST, 2012, EXPERT OPIN INV DRUG, V21, P1563, DOI 10.1517/13543784.2012.707192
   Ott G, 2013, BLOOD, V122, P3884, DOI 10.1182/blood-2013-05-498329
   Perry JJP, 2008, TRENDS BIOCHEM SCI, V33, P201, DOI 10.1016/j.tibs.2008.02.001
   Poulsen SL, 2013, J CELL BIOL, V201, P797, DOI 10.1083/jcb.201212075
   PRENDERGAST GC, 1991, SCIENCE, V251, P186, DOI 10.1126/science.1987636
   Prudden J, 2007, EMBO J, V26, P4089, DOI 10.1038/sj.emboj.7601838
   Psakhye I, 2012, CELL, V151, P807, DOI 10.1016/j.cell.2012.10.021
   Rodriguez MS, 2001, J BIOL CHEM, V276, P12654, DOI 10.1074/jbc.M009476200
   Rojas-Fernandez A, 2014, MOL CELL, V53, P880, DOI 10.1016/j.molcel.2014.02.031
   Roukens MG, 2008, MOL CELL BIOL, V28, P2342, DOI 10.1128/MCB.01159-07
   Sabo A, 2014, PLOS ONE, V9, DOI 10.1371/journal.pone.0091072
   Schimmel J, 2008, MOL CELL PROTEOMICS, V7, P2107, DOI 10.1074/mcp.M800025-MCP200
   Schimmel J, 2014, MOL CELL, V53, P1053, DOI 10.1016/j.molcel.2014.02.001
   Sears R, 2000, GENE DEV, V14, P2501, DOI 10.1101/gad.836800
   Shen LN, 2009, BIOCHEM J, V421, P223, DOI 10.1042/BJ20090246
   Soucy TA, 2009, NATURE, V458, P732, DOI 10.1038/nature07884
   Sun H, 2007, EMBO J, V26, P4102, DOI 10.1038/sj.emboj.7601839
   Sun HY, 2012, J BIOL CHEM, V287, P42071, DOI 10.1074/jbc.M112.410985
   Tatham MH, 2008, NAT CELL BIOL, V10, P538, DOI 10.1038/ncb1716
   Ulrich HD, 2008, MOL CELL, V32, P301, DOI 10.1016/j.molcel.2008.10.010
   Vellinga J, 2006, J GENE MED, V8, P147, DOI 10.1002/jgm.844
   Vertegaal ACO, 2011, CHEM REV, V111, P7923, DOI 10.1021/cr200187e
   Vertegaal ACO, 2010, BIOCHEM SOC T, V38, P46, DOI 10.1042/BST0380046
   Vyas R, 2013, CELL DEATH DIFFER, V20, P490, DOI 10.1038/cdd.2012.145
   Yunus AA, 2009, MOL CELL, V35, P669, DOI 10.1016/j.molcel.2009.07.013
NR 56
TC 53
Z9 53
U1 2
U2 17
PU TAYLOR & FRANCIS INC
PI PHILADELPHIA
PA 530 WALNUT STREET, STE 850, PHILADELPHIA, PA 19106 USA
SN 1538-4101
EI 1551-4005
J9 CELL CYCLE
JI Cell Cycle
PD JUN 18
PY 2015
VL 14
IS 12
BP 1859
EP 1872
DI 10.1080/15384101.2015.1040965
PG 14
WC Cell Biology
WE Science Citation Index Expanded (SCI-EXPANDED)
SC Cell Biology
GA CK6YI
UT WOS:000356374600015
PM 25895136
OA Bronze, Green Published, Green Submitted
DA 2022-04-10
ER

PT J
AU Martino-Echarri, E
   Fernandez-Rodriguez, R
   Bech-Serra, JJ
   Plaza-Calonge, MD
   Vidal, N
   Casal, C
   Colome, N
   Seoane, J
   Canals, F
   Rodriguez-Manzaneque, JC
AF Martino-Echarri, Estefania
   Fernandez-Rodriguez, Ruben
   Josep Bech-Serra, Joan
   del Carmen Plaza-Calonge, Maria
   Vidal, Noemi
   Casal, Carmen
   Colome, Nuria
   Seoane, Joan
   Canals, Francesc
   Carlos Rodriguez-Manzaneque, Juan
TI Relevance of IGFBP2 proteolysis in glioma and contribution of the
   extracellular protease ADAMTS1
SO ONCOTARGET
LA English
DT Article
DE ADAMTS; extracellular proteolysis; glioma; IGFBP2; proteomics
ID FACTOR-BINDING PROTEIN-2; STEM-LIKE CELLS; IN-VIVO; INSULIN; GROWTH;
   GLIOBLASTOMA; CLEAVAGE; METALLOPROTEINASE; EXPRESSION; INVASION
AB Expression of IGFBP2 (Insulin-like Growth Factor Binding Protein 2) has been positively correlated with glioma progression. Although the proteolysis of IGFBP2 has been widely recognized, with consequences as a major modulator of IGFII signaling, the relevance of this post-translational modification has not been well studied in tumors. Using an in vivo proteomic approach by Isotope-Coded Protein Label (ICPL), we identified IGFBP2 as a target of the extracellular protease ADAMTS1 (A Disintegrin And Metalloproteinase with ThromboSpondin motifs 1). Notably, the proteolytic pattern of IGFBP2 was also detected in human glioma culture cells and, more importantly, in all glioma samples evaluated. In addition, high expression of ADAMTS1 correlates with higher levels of cleaved IGFBP2 in glioblastoma multiforme cases. Using gene expression public databases, we confirmed that IGFBP2 is a poor prognosis marker for gliomas, and we also observed an important contribution of ADAMTS1. Finally, we showed the impact of ADAMTS1 on IGFII-mediated IGF1R phosphorylation and cellular migration. Our results support a functional interaction between IGFBP2 and ADAMTS1 and suggest the need to evaluate post-translational modification of IGFBP2 in glioma, in order to approach new therapies.
C1 [Martino-Echarri, Estefania; Fernandez-Rodriguez, Ruben; del Carmen Plaza-Calonge, Maria; Casal, Carmen; Carlos Rodriguez-Manzaneque, Juan] Pfizer Univ Granada Junta de Andalucia, GENYO Ctr Genom & Oncol Res, Granada, Spain.
   [Josep Bech-Serra, Joan; Colome, Nuria; Seoane, Joan; Canals, Francesc] Vall dHebron Univ Hosp, Vall dHebron Inst Oncol VHIO, Barcelona, Spain.
   [Vidal, Noemi] Hosp Univ Bellvitge, Inst Neuropatol, Lhospitalet De Llobregat, Spain.
   [Seoane, Joan] ICREA, Barcelona, Spain.
RP Rodriguez-Manzaneque, JC (corresponding author), Pfizer Univ Granada Junta de Andalucia, GENYO Ctr Genom & Oncol Res, Granada, Spain.
EM juancarlos.rodriguez@genyo.es
RI Seoane, Joan/AAG-9173-2019; Bech-Serra, Joan Josep/AAA-2330-2020;
   Rodriguez-Manzaneque, Juan Carlos/F-3899-2012; Fernandez-Rodriguez,
   Ruben/ABE-7567-2021
OI Seoane, Joan/0000-0002-6541-5974; Bech-Serra, Joan
   Josep/0000-0003-3486-781X; Rodriguez-Manzaneque, Juan
   Carlos/0000-0001-5951-7029; Fernandez-Rodriguez,
   Ruben/0000-0001-9127-1735; Casal Moreno, Carmen/0000-0002-4898-7671;
   Vidal, Noemi/0000-0002-2852-6667
FU Plan Nacional I+D+i; Ministerio de SanidadInstituto de Salud Carlos
   IIISpanish Government; Instituto de Salud Carlos III from SpainInstituto
   de Salud Carlos III; FEDEREuropean Commission [PI10/00883, PI07/1058,
   PI10/01847]; Consejeria de Economia, Innovacion y Ciencia-Junta de
   AndaluciaJunta de Andalucia [P10-CTS5865]; ICREAICREA Funding Source:
   Custom
FX 3T3-IGF1R cells were kindly provided by Prof. Axel Ullrich (Max Planck
   Institute of Biochemistry, Martinsried, Germany). ADAMTS1 antibody
   (clone 5D4E11B5) was a generous gift by Prof. M. L. Iruela-Arispe (UCLA,
   USA). We thank Dr. Shelley N. Thai for the English editing. The
   Proteomics Laboratory at VHIO is a member of the Carlos III Networked
   Proteomics Platform ProteoRed-ISCIII. This work was supported by grants
   from the Plan Nacional I+D+i 2008-2011, Ministerio de Sanidad and
   Instituto de Salud Carlos III from Spain, co-financed by FEDER
   (PI10/00883 to J.C.R.M.; PI07/1058 and PI10/01847 to F. C.) and from the
   Consejeria de Economia, Innovacion y Ciencia-Junta de Andalucia
   (P10-CTS5865 to J.C.R.M.).
CR Apte SS, 2009, J BIOL CHEM, V284, P31493, DOI 10.1074/jbc.R109.052340
   Bunn RC, 2003, TRENDS ENDOCRIN MET, V14, P176, DOI 10.1016/S1043-2760(03)00049-3
   Canals F, 2006, PROTEOMICS, V6, pS28, DOI 10.1002/pmic.200500446
   Rodriguez-Manzaneque JC, 2009, INT J BIOCHEM CELL B, V41, P800, DOI 10.1016/j.biocel.2008.08.014
   Casal C, 2010, CANCER RES, V70, P4676, DOI 10.1158/0008-5472.CAN-09-4197
   Elmlinger MW, 2001, ENDOCRINOLOGY, V142, P1652, DOI 10.1210/en.142.4.1652
   Esselens C, 2010, J BIOL CHEM, V285, P2463, DOI 10.1074/jbc.M109.055129
   Firth SM, 2002, ENDOCR REV, V23, P824, DOI 10.1210/er.2001-0033
   Fukushima T, 2007, ANTICANCER RES, V27, P3685
   Holmes KM, 2012, P NATL ACAD SCI USA, V109, P3475, DOI 10.1073/pnas.1120375109
   Hsieh D, 2010, BIOCHEM BIOPH RES CO, V397, P367, DOI 10.1016/j.bbrc.2010.05.145
   Lin Y, 2009, NEURO-ONCOLOGY, V11, P468, DOI 10.1215/15228517-2008-114
   Liu YJ, 2006, ONCOGENE, V25, P2452, DOI 10.1038/sj.onc.1209287
   Lopez-Otin C, 2002, NAT REV MOL CELL BIO, V3, P509, DOI 10.1038/nrm858
   Martino-Echarri E, 2013, INT J CANCER, V133, P2315, DOI 10.1002/ijc.28271
   Matthews RT, 2000, J BIOL CHEM, V275, P22695, DOI 10.1074/jbc.M909764199
   Nakamura M, 2005, BIOCHEM BIOPH RES CO, V333, P1011, DOI 10.1016/j.bbrc.2005.06.010
   Pollak M, 2008, NAT REV CANCER, V8, P915, DOI 10.1038/nrc2536
   Reynolds LE, 2010, NATURE, V465, P813
   Ricci-Vitiani L, 2010, NATURE, V468, P824, DOI 10.1038/nature09557
   Ricciardelli C, 2011, AM J PATHOL
   Rocks N, 2008, CANCER RES, V68, P9541, DOI 10.1158/0008-5472.CAN-08-0548
   Rodriguez-Manzaneque JC, 2002, BIOCHEM BIOPH RES CO, V293, P501
   Ryan AJ, 2009, BRIT J CANCER, V101, P278, DOI 10.1038/sj.bjc.6605141
   Sandy JD, 2001, J BIOL CHEM, V276, P13372, DOI 10.1074/jbc.M009737200
   Schmidt A, 2005, PROTEOMICS, V5, P4, DOI 10.1002/pmic.200400873
   Torres-Collado AX, 2006, J BIOL CHEM, V281, P17827, DOI 10.1074/jbc.M513465200
   Varga I, 2011, PATHOL ONCOL RES
   Vazquez F, 1999, J BIOL CHEM, V274, P23349, DOI 10.1074/jbc.274.33.23349
   Viapiano MS, 2008, J NEURO-ONCOL, V88, P261, DOI 10.1007/s11060-008-9575-8
   Wang H, 2003, CANCER RES, V63, P4315
   Wang R, 2010, NATURE, V468, P829, DOI 10.1038/nature09624
   Werb Z, 1997, CELL, V91, P439, DOI 10.1016/S0092-8674(00)80429-8
NR 33
TC 9
Z9 9
U1 0
U2 18
PU IMPACT JOURNALS LLC
PI ORCHARD PARK
PA 6666 E QUAKER ST, STE 1, ORCHARD PARK, NY 14127 USA
EI 1949-2553
J9 ONCOTARGET
JI Oncotarget
PD JUN
PY 2014
VL 5
IS 12
BP 4295
EP 4304
DI 10.18632/oncotarget.2009
PG 10
WC Oncology; Cell Biology
WE Science Citation Index Expanded (SCI-EXPANDED)
SC Oncology; Cell Biology
GA AL3UM
UT WOS:000339055200027
PM 24962328
OA Green Published, gold
DA 2022-04-10
ER

PT J
AU Lence, T
   Paolantoni, C
   Worpenberg, L
   Roignant, JY
AF Lence, Tina
   Paolantoni, Chiara
   Worpenberg, Lina
   Roignant, Jean-Yves
TI Mechanistic insights into m(6)A RNA enzymes
SO BIOCHIMICA ET BIOPHYSICA ACTA-GENE REGULATORY MECHANISMS
LA English
DT Review
DE RNA modifications; m(6)A; MAC; MACOM; Mettl3; Mettl16; RlmJ
ID MESSENGER-RNA; RIBOSOMAL-RNA; ESCHERICHIA-COLI; SEX DETERMINATION;
   CRYSTAL-STRUCTURE; METHYLTRANSFERASE; METHYLATION; GENE; PROTEIN; HAKAI
AB The field of RNA modifications, so-called epitranscriptomics, has flourished over the past years owing to improvements of detection methods and the identification of important regulatory players. N6-methyladenosine (m(6)A) is the most abundant internal modification in messenger (mRNA) and long non-coding (IncRNA), and controls most steps of RNA metabolism. Its physiological roles range from gametogenesis, stem cell differentiation to immunity, neuronal development and functions, while its alterations are associated with cancer development and progression. In this review we focus on the proteins that catalyze formation of m(6)A (also called writers) on RNA. Interestingly, distinct proteins deposit m(6)A on different classes of RNA, indicating that specific RNA features dictate recognition mechanisms. Associated factors and post-translational modification can also alter m(6)A enzyme activity. A better understanding of the underlying regulation involved in m(6)A deposition is the first step towards developing tools for cancer therapy and for treatment of other m(6)A-associated diseases.
C1 [Lence, Tina; Paolantoni, Chiara; Worpenberg, Lina; Roignant, Jean-Yves] IMB, Lab RNA Epigenet, D-55128 Mainz, Germany.
RP Roignant, JY (corresponding author), IMB, Lab RNA Epigenet, D-55128 Mainz, Germany.
EM j.roignant@imb-mainz.de
OI Roignant, Jean-Yves/0000-0003-1395-2150; Lence, Tina/0000-0001-9377-546X
FU DFGGerman Research Foundation (DFG)European Commission [RO4681/5-1];
   DIPEuropean Commission [RO4681/6-1]; Boehringer Ingelheim
   FondsBoehringer Ingelheim
FX This work was supported by the DFG (RO4681/5-1) and the DIP (RO4681/6-1)
   to JYR, and by the Boehringer Ingelheim Fonds to CP. JYR is a member of
   the European Epitranscriptomic COST Action (CAI6120).
CR Agarwala SD, 2012, PLOS GENET, V8, DOI 10.1371/journal.pgen.1002732
   AGRIS PF, 1986, BIOCHEMISTRY-US, V25, P5126, DOI 10.1021/bi00366a022
   Angelova MT, 2018, FRONT BIOENG BIOTECH, V6, DOI 10.3389/fbioe.2018.00046
   Aparicio LA, 2012, CANCER METAST REV, V31, P375, DOI 10.1007/s10555-012-9348-x
   Bailey AS, 2017, ELIFE, V6, DOI 10.7554/eLife.26116
   Batista PJ, 2014, CELL STEM CELL, V15, P707, DOI 10.1016/j.stem.2014.09.019
   Bell DW, 2014, EXPERT OPIN THER TAR, V18, P725, DOI 10.1517/14728222.2014.909414
   Boccaletto P, 2018, NUCLEIC ACIDS RES, V46, pD303, DOI 10.1093/nar/gkx1030
   Bodi Z, 2015, PLOS ONE, V10, DOI 10.1371/journal.pone.0132090
   Bokar JA, 1997, RNA, V3, P1233
   BOKAR JA, 1994, J BIOL CHEM, V269, P17697
   BRINGMANN P, 1987, FEBS LETT, V213, P309, DOI 10.1016/0014-5793(87)81512-0
   Brocard M, 2017, J GEN VIROL, V98, P2207, DOI 10.1099/jgv.0.000910
   Brown JA, 2016, P NATL ACAD SCI USA, V113, P14013, DOI 10.1073/pnas.1614759113
   Bussiere DE, 1998, BIOCHEMISTRY-US, V37, P7103, DOI 10.1021/bi973113c
   Castosa R, 2018, SCI REP-UK, V8, DOI 10.1038/s41598-018-21808-w
   CRICK FHC, 1966, J MOL BIOL, V19, P548, DOI 10.1016/S0022-2836(66)80022-0
   Dai DJ, 2018, CELL DEATH DIS, V9, DOI 10.1038/s41419-017-0129-x
   Deplus R, 2014, CELL REP, V8, P743, DOI 10.1016/j.celrep.2014.06.048
   Dominissini D, 2012, NATURE, V485, P201, DOI 10.1038/nature11112
   Du YZ, 2018, NUCLEIC ACIDS RES, V46, P5195, DOI 10.1093/nar/gky156
   Dumelin CE, 2012, NAT CHEM BIOL, V8, P913, DOI [10.1038/nchembio.1070, 10.1038/NCHEMBIO.1070]
   Dunin-Horkawicz S, 2006, NUCLEIC ACIDS RES, V34, pD145, DOI 10.1093/nar/gkj084
   Edupuganti RR, 2017, NAT STRUCT MOL BIOL, V24, P870, DOI 10.1038/nsmb.3462
   Engel M, 2018, GENES BRAIN BEHAV, V17, DOI 10.1111/gbb.12428
   Figueroa A, 2009, CELL CYCLE, V8, P3648, DOI 10.4161/cc.8.22.9909
   Figueroa A, 2009, MOL BIOL CELL, V20, P3533, DOI 10.1091/mbc.E08-08-0845
   Forbes SA, 2015, NUCLEIC ACIDS RES, V43, pD805, DOI 10.1093/nar/gku1075
   Fujita Y, 2002, NAT CELL BIOL, V4, P222, DOI 10.1038/ncb758
   Fustin JM, 2018, P NATL ACAD SCI USA, V115, P5980, DOI 10.1073/pnas.1721371115
   Fustin JM, 2013, CELL, V155, P793, DOI 10.1016/j.cell.2013.10.026
   Geula S, 2015, SCIENCE, V347, P1002, DOI 10.1126/science.1261417
   Gokhale NS, 2017, PLOS PATHOG, V13, DOI 10.1371/journal.ppat.1006188
   Golovina AY, 2012, RNA, V18, P1725, DOI 10.1261/rna.034207.112
   Guo J, 2018, P NATL ACAD SCI USA, V115, P3674, DOI 10.1073/pnas.1720945115
   Haussmann IU, 2016, NATURE, V540, P301, DOI 10.1038/nature20577
   He LJ, 2018, J CELL MOL MED, V22, P4630, DOI 10.1111/jcmm.13804
   Hervouet E, 2010, PLOS ONE, V5, DOI 10.1371/journal.pone.0011333
   Horiuchi K, 2013, J BIOL CHEM, V288, P33292, DOI 10.1074/jbc.M113.500397
   Huang J, 2019, PROTEIN CELL, V10, P272, DOI 10.1007/s13238-018-0518-7
   Ito T, 2001, P NATL ACAD SCI USA, V98, P4569, DOI 10.1073/pnas.061034498
   Ivanova I, 2017, MOL CELL, V67, P1059, DOI 10.1016/j.molcel.2017.08.003
   Jain D., 2018, ELIFE, V7
   Kan LJ, 2017, NAT COMMUN, V8, DOI 10.1038/ncomms15737
   Kellner S, 2010, RNA BIOL, V7, P237, DOI 10.4161/rna.7.2.11468
   Knuckles P, 2018, FEBS LETT, V592, P2845, DOI 10.1002/1873-3468.13107
   Knuckles P, 2018, GENE DEV, V32, P415, DOI 10.1101/gad.309146.117
   Konevega AL, 2004, RNA, V10, P90, DOI 10.1261/rna.5142404
   Lavoie G, 2011, BIOCHEM BIOPH RES CO, V409, P187, DOI 10.1016/j.bbrc.2011.04.115
   Lence T., 2017, RNA BIOL, P1
   Lence T, 2016, NATURE, V540, P242, DOI 10.1038/nature20568
   Liao SH, 2018, GENOM PROTEOM BIOINF, V16, P99, DOI 10.1016/j.gpb.2018.04.002
   Liu JZ, 2014, NAT CHEM BIOL, V10, P93, DOI 10.1038/nchembio.1432
   Liu N, 2015, NATURE, V518, P560, DOI 10.1038/nature14234
   Liu ZX, 2018, FRONT BIOENG BIOTECH, V6, DOI 10.3389/fbioe.2018.00089
   McCulloch V, 2002, MOL CELL BIOL, V22, P1116, DOI 10.1128/MCB.22.4.1116-1125.2002
   Meyer KD, 2014, NAT REV MOL CELL BIO, V15, P313, DOI 10.1038/nrm3785
   Morena F, 2018, GENES-BASEL, V9, DOI 10.3390/genes9070329
   Mukherjee M, 2012, EMBO J, V31, P1308, DOI 10.1038/emboj.2011.496
   Noack F, 2018, FRONT NEUROSCI-SWITZ, V12, DOI 10.3389/fnins.2018.00085
   O'Farrell HC, 2004, J MOL BIOL, V339, P337, DOI 10.1016/j.jmb.2004.02.068
   Pan T, 2018, CELL RES, V28, P395, DOI 10.1038/s41422-018-0013-y
   Pan YT, 2018, J HEMATOL ONCOL, V11, DOI 10.1186/s13045-018-0590-8
   PARKER KA, 1989, METHOD ENZYMOL, V180, P454
   Patil DP, 2018, TRENDS CELL BIOL, V28, P113, DOI 10.1016/j.tcb.2017.10.001
   Patil DP, 2016, NATURE, V537, P369, DOI 10.1038/nature19342
   Pendleton KE, 2017, CELL, V169, P824, DOI 10.1016/j.cell.2017.05.003
   Ping XL, 2014, CELL RES, V24, P177, DOI 10.1038/cr.2014.3
   Punekar AS, 2013, NUCLEIC ACIDS RES, V41, P9537, DOI 10.1093/nar/gkt719
   REDDY R, 1981, J BIOL CHEM, V256, P3532
   Riquelme-Barrios S, 2018, FRONT MICROBIOL, V8, DOI 10.3389/fmicb.2018.00576
   Roignant JY, 2017, TRENDS GENET, V33, P380, DOI 10.1016/j.tig.2017.04.003
   Roundtree IA, 2017, CELL, V169, P1187, DOI 10.1016/j.cell.2017.05.045
   Ruszkowska A, 2018, SCI REP-UK, V8, DOI 10.1038/s41598-018-23608-8
   Sanchez-Vasquez E., 2018, MECH DEVELOP, P30005
   SANEYOSHI M, 1969, BIOCHIM BIOPHYS ACTA, V190, P264, DOI 10.1016/0005-2787(69)90078-1
   Scholler E, 2018, RNA, V24, P499, DOI 10.1261/rna.064063.117
   Schwartz S, 2014, CELL REP, V8, P284, DOI 10.1016/j.celrep.2014.05.048
   Schwartz S, 2013, CELL, V155, P1409, DOI 10.1016/j.cell.2013.10.047
   Sergiev PV, 2008, J MOL BIOL, V375, P291, DOI 10.1016/j.jmb.2007.10.051
   Sergiev PV, 2016, J MOL BIOL, V428, P2134, DOI 10.1016/j.jmb.2015.12.013
   Shima H, 2017, CELL REP, V21, P3354, DOI 10.1016/j.celrep.2017.11.092
   Sledz P, 2016, ELIFE, V5, DOI 10.7554/eLife.18434
   Stuart JW, 2000, BIOCHEMISTRY-US, V39, P13396, DOI 10.1021/bi0013039
   Sugiyama Y, 2010, BIOCHEM J, V427, P489, DOI 10.1042/BJ20091856
   Tan B, 2018, REV MED VIROL, V28, DOI 10.1002/rmv.1983
   Urbonavicius J, 2003, RNA, V9, P760, DOI 10.1261/rna.5210803
   Urbonavicius J, 2001, EMBO J, V20, P4863, DOI 10.1093/emboj/20.17.4863
   Wang CY, 2015, BIOCHEM BIOPH RES CO, V465, P88, DOI 10.1016/j.bbrc.2015.07.135
   Wang P, 2016, MOL CELL, V63, P306, DOI 10.1016/j.molcel.2016.05.041
   Wang SY, 2018, MOL CANCER, V17, DOI 10.1186/s12943-018-0847-4
   Wang X, 2016, NATURE, V534, P575, DOI 10.1038/nature18298
   Warda AS, 2017, EMBO REP, V18, P2004, DOI 10.15252/embr.201744940
   Wen J, 2018, MOL CELL, V69, P1028, DOI 10.1016/j.molcel.2018.02.015
   Widagdo J, 2018, J NEUROCHEM, V147, P137, DOI 10.1111/jnc.14481
   Wojtas MN, 2017, MOL CELL, V68, P374, DOI 10.1016/j.molcel.2017.09.021
   Xu K, 2017, CELL RES, V27, P1100, DOI 10.1038/cr.2017.100
   Yang Y, 2018, CELL RES, V28, P616, DOI 10.1038/s41422-018-0040-8
   Yoon KJ, 2018, NEURON, V99, P243, DOI 10.1016/j.neuron.2018.07.019
   Yue YA, 2018, CELL DISCOV, V4, DOI 10.1038/s41421-018-0019-0
   Zhang CX, 2017, NATURE, V549, P273, DOI 10.1038/nature23883
   Zhao BXS, 2017, NAT REV MOL CELL BIO, V18, P31, DOI 10.1038/nrm.2016.132
   Zhong SL, 2008, PLANT CELL, V20, P1278, DOI 10.1105/tpc.108.058883
NR 103
TC 53
Z9 53
U1 6
U2 49
PU ELSEVIER SCIENCE BV
PI AMSTERDAM
PA PO BOX 211, 1000 AE AMSTERDAM, NETHERLANDS
SN 1874-9399
EI 1876-4320
J9 BBA-GENE REGUL MECH
JI Biochim. Biophys. Acta-Gene Regul. Mech.
PD MAR
PY 2019
VL 1862
IS 3
SI SI
BP 222
EP 229
DI 10.1016/j.bbagrm.2018.10.014
PG 8
WC Biochemistry & Molecular Biology; Biophysics
WE Science Citation Index Expanded (SCI-EXPANDED)
SC Biochemistry & Molecular Biology; Biophysics
GA HQ0SE
UT WOS:000462104500002
PM 30395944
DA 2022-04-10
ER

PT J
AU Thompson, NJ
   Rosati, S
   Rose, RJ
   Heck, AJR
AF Thompson, Natalie J.
   Rosati, Sara
   Rose, Rebecca J.
   Heck, Albert J. R.
TI The impact of mass spectrometry on the study of intact antibodies: from
   post-translational modification to structural analysis
SO CHEMICAL COMMUNICATIONS
LA English
DT Article
ID ELECTRON-TRANSFER DISSOCIATION; RECOMBINANT MONOCLONAL-ANTIBODY;
   protein-protein interaction; CHEMICAL CROSS-LINKING; FAB-ARM EXCHANGE;
   HYDROGEN/DEUTERIUM EXCHANGE; HYDROGEN-EXCHANGE; THERAPEUTIC ANTIBODIES;
   LIQUID-CHROMATOGRAPHY; MACROMOLECULAR ASSEMBLIES
AB Monoclonal antibodies (mAbs) are important therapeutics, targeting a variety of diseases ranging from cancers to neurodegenerative disorders. In developmental stages and prior to clinical use, these molecules require thorough structural characterisation, but their large size and heterogeneity present challenges for most analytical techniques. Over the past 20 years, mass spectrometry (MS) has transformed from a tool for small molecule analysis to a technique that can be used to study large intact proteins and non-covalent protein complexes. Here, we review several MS-based techniques that have emerged for the analysis of intact mAbs and discuss the prospects of using these technologies for the analysis of biopharmaceuticals.
C1 [Thompson, Natalie J.; Rosati, Sara; Rose, Rebecca J.; Heck, Albert J. R.] Univ Utrecht, Bijvoet Ctr Biomol Res, NL-3584 CH Utrecht, Netherlands.
   [Thompson, Natalie J.; Rosati, Sara; Rose, Rebecca J.; Heck, Albert J. R.] Univ Utrecht, Utrecht Inst Pharmaceut Sci, NL-3584 CH Utrecht, Netherlands.
   [Thompson, Natalie J.; Rosati, Sara; Rose, Rebecca J.; Heck, Albert J. R.] Netherlands Prote Ctr, NL-3584 CH Utrecht, Netherlands.
RP Heck, AJR (corresponding author), Univ Utrecht, Bijvoet Ctr Biomol Res, Padualaan 8, NL-3584 CH Utrecht, Netherlands.
EM A.J.R.Heck@uu.nl
RI Heck, Albert/D-7098-2011
OI Heck, Albert/0000-0002-2405-4404
FU Dutch Foundation of Technical Sciences [10805]; Netherlands Proteomics
   Centre embedded in the Netherlands Genomics Initiative
FX This work was supported by the Dutch Foundation of Technical Sciences
   (STW: project 10805). We thank the Netherlands Proteomics Centre
   embedded in the Netherlands Genomics Initiative for additional support.
   We appreciate the input of many industrial collaborators with whom we
   worked over the years on the structural analysis of antibodies (in
   particular Roche, Genmab, and Merus) and on the redesign of instruments
   for optimal analysis of intact protein assemblies (notably MSVision,
   Waters, and Thermo Fisher).
CR Abzalimov RR, 2009, J AM SOC MASS SPECTR, V20, P1514, DOI 10.1016/j.jasms.2009.04.006
   ALEXANDER AJ, 1995, ANAL CHEM, V67, P3626, DOI 10.1021/ac00116a002
   Atmanene C, 2009, ANAL CHEM, V81, P6364, DOI 10.1021/ac9007557
   Aye TT, 2005, ANAL CHEM, V77, P5814, DOI 10.1021/ac050353m
   Baerga-Ortiz A, 2002, PROTEIN SCI, V11, P1300, DOI 10.1110/ps.4670102
   Bagal D, 2010, ANAL CHEM, V82, P6751, DOI 10.1021/ac1013139
   BAI YW, 1993, PROTEINS, V17, P75, DOI 10.1002/prot.340170110
   Beck A, 2005, J CHROMATOGR B, V819, P203, DOI 10.1016/j.jchromb.2004.06.052
   Beck A, 2010, NAT REV IMMUNOL, V10, P345, DOI 10.1038/nri2747
   Beck A, 2008, CURR PHARM BIOTECHNO, V9, P482, DOI 10.2174/138920108786786411
   Bich C, 2010, ANAL CHEM, V82, P172, DOI 10.1021/ac901651r
   Brekke OH, 2003, NAT REV DRUG DISCOV, V2, P52, DOI 10.1038/nrd984
   Breuker K, 2008, J AM SOC MASS SPECTR, V19, P1045, DOI 10.1016/j.jasms.2008.05.013
   Burkitt W, 2010, PROTEIN SCI, V19, P826, DOI 10.1002/pro.362
   Chu GC, 2007, PHARM RES-DORDR, V24, P1145, DOI 10.1007/s11095-007-9241-4
   Coales SJ, 2009, RAPID COMMUN MASS SP, V23, P639, DOI 10.1002/rcm.3921
   de Kruif J, 2010, BIOTECHNOL BIOENG, V106, P741, DOI 10.1002/bit.22763
   Dillon TM, 2006, J CHROMATOGR A, V1120, P112, DOI 10.1016/j.chroma.2006.01.016
   Dillon TM, 2004, J CHROMATOGR A, V1053, P299, DOI 10.1016/j.chroma.2004.08.058
   Engen JR, 2009, ANAL CHEM, V81, P7870, DOI 10.1021/ac901154s
   Falconer RJ, 2011, J CHEM TECHNOL BIOT, V86, P915, DOI 10.1002/jctb.2629
   FENG R, 1992, ANAL CHEM, V64, P2090, DOI 10.1021/ac00042a012
   FENN JB, 1989, SCIENCE, V246, P64, DOI 10.1126/science.2675315
   Gadgil HS, 2007, J PHARM SCI-US, V96, P2607, DOI 10.1002/jps.20966
   Gadgil HS, 2006, J AM SOC MASS SPECTR, V17, P867, DOI 10.1016/j.jasms.2006.02.023
   Garcia RA, 2004, ASSAY DRUG DEV TECHN, V2, P81, DOI 10.1089/154065804322966342
   Gotz J, 2012, BRIT J PHARMACOL, V165, P1246, DOI 10.1111/j.1476-5381.2011.01713.x
   Gunasekaran K, 2010, J BIOL CHEM, V285, P19637, DOI 10.1074/jbc.M110.117382
   Hambly DM, 2005, J AM SOC MASS SPECTR, V16, P2057, DOI 10.1016/j.jasms.2005.09.008
   Heck AJR, 2008, NAT METHODS, V5, P927, DOI 10.1038/nmeth.1265
   Hoofnagle AN, 2003, ANNU REV BIOPH BIOM, V32, P1, DOI 10.1146/annurev.biophys.32.110601.142417
   Houde D, 2010, MOL CELL PROTEOMICS, V9, P1716, DOI 10.1074/mcp.M900540-MCP200
   Houde D, 2009, ANAL CHEM, V81, P5966, DOI 10.1021/ac9009287
   Huang RYC, 2011, BIOCHEMISTRY-US, V50, P9273, DOI 10.1021/bi2010027
   Jackson SN, 2009, J AM SOC MASS SPECTR, V20, P176, DOI 10.1016/j.jasms.2008.08.021
   Johnson KA, 2007, ANAL BIOCHEM, V360, P75, DOI 10.1016/j.ab.2006.10.012
   Jones LM, 2011, ANAL CHEM, V83, P7657, DOI 10.1021/ac2007366
   KARAS M, 1987, INT J MASS SPECTROM, V78, P53, DOI 10.1016/0168-1176(87)87041-6
   Krapp S, 2003, J MOL BIOL, V325, P979, DOI 10.1016/S0022-2836(02)01250-0
   Kubota T, 2009, CANCER SCI, V100, P1566, DOI 10.1111/j.1349-7006.2009.01222.x
   Kukrer B, 2010, PHARM RES-DORDR, V27, P2197, DOI 10.1007/s11095-010-0224-5
   Labrijn AF, 2011, J IMMUNOL, V187, P3238, DOI 10.4049/jimmunol.1003336
   Labrijn AF, 2009, NAT BIOTECHNOL, V27, P767, DOI 10.1038/nbt.1553
   Landgraf RR, 2012, J AM SOC MASS SPECTR, V23, P301, DOI 10.1007/s13361-011-0298-2
   Lazar AC, 2005, RAPID COMMUN MASS SP, V19, P1806, DOI 10.1002/rcm.1987
   Liu HC, 2006, J CHROMATOGR B, V837, P35, DOI 10.1016/j.jchromb.2006.03.053
   Loo JA, 2000, INT J MASS SPECTROM, V200, P175, DOI 10.1016/S1387-3806(00)00298-0
   Lu JR, 2005, BIOCHEMISTRY-US, V44, P11106, DOI 10.1021/bi0505464
   Lyubarskaya Y, 2006, ANAL BIOCHEM, V348, P24, DOI 10.1016/j.ab.2005.10.003
   Maple HJ, 2012, J MED CHEM, V55, P837, DOI 10.1021/jm201347k
   MAYO SL, 1993, SCIENCE, V262, P873, DOI 10.1126/science.8235609
   Mikesh LM, 2006, BBA-PROTEINS PROTEOM, V1764, P1811, DOI 10.1016/j.bbapap.2006.10.003
   Milla CE, 2012, DRUG FUTURE, V37, P33, DOI 10.1358/dof.2012.037.01.1688497
   Moore GL, 2010, MABS-AUSTIN, V2, P181, DOI 10.4161/mabs.2.2.11158
   Nallet S, 2012, NEW BIOTECHNOL, V29, P471, DOI 10.1016/j.nbt.2012.02.003
   Oda M, 2006, FEBS J, V273, P1476, DOI 10.1111/j.1742-4658.2006.05168.x
   Oda M, 2009, MOL IMMUNOL, V47, P357, DOI 10.1016/j.molimm.2009.09.009
   Pan JX, 2009, J AM CHEM SOC, V131, P12801, DOI 10.1021/ja904379w
   Pandit D, 2012, J MOL RECOGNIT, V25, P114, DOI 10.1002/jmr.1169
   Quiles S, 2010, J MED CHEM, V53, P586, DOI 10.1021/jm900899g
   Rand KD, 2009, ANAL CHEM, V81, P5577, DOI 10.1021/ac9008447
   Reichert JM, 2012, MABS-AUSTIN, V4, P1, DOI 10.4161/mabs.4.1.18719
   Reichert JM, 2011, MABS-AUSTIN, V3, P76, DOI 10.4161/mabs.3.1.13895
   Remmele RL, 2006, J PHARM SCI-US, V95, P126, DOI 10.1002/jps.20515
   Rosati S, 2012, ANGEW CHEM INT EDIT, V51, P12992, DOI 10.1002/anie.201206745
   Rosati S, 2012, ANAL CHEM, V84, P7227, DOI 10.1021/ac301611d
   Rose R. J., 2012, UNPUB
   Rose RJ, 2012, NAT METHODS, V9, P1084, DOI [10.1038/nmeth.2208, 10.1038/NMETH.2208]
   Rose RJ, 2011, STRUCTURE, V19, P1274, DOI 10.1016/j.str.2011.06.016
   Safavy A, 2003, BIOCONJUGATE CHEM, V14, P302, DOI 10.1021/bc020033z
   Schreiber A, 2011, NATURE, V470, P227, DOI 10.1038/nature09756
   Scott AM, 2012, NAT REV CANCER, V12, P278, DOI 10.1038/nrc3236
   Sharon M, 2007, ANNU REV BIOCHEM, V76, P167, DOI 10.1146/annurev.biochem.76.061005.090816
   Shoemaker GK, 2010, MOL CELL PROTEOMICS, V9, P1742, DOI 10.1074/mcp.M900620-MCP200
   SIEGEL MM, 1991, ANAL CHEM, V63, P2470, DOI 10.1021/ac00021a016
   Siemiatkoski J, 2006, CARBOHYD RES, V341, P410, DOI 10.1016/j.carres.2005.11.024
   Sinz A, 2006, MASS SPECTROM REV, V25, P663, DOI 10.1002/mas.20082
   Smith DL, 1997, J MASS SPECTROM, V32, P135, DOI 10.1002/(SICI)1096-9888(199702)32:2<135::AID-JMS486>3.0.CO;2-M
   Sobott F, 2002, ANAL CHEM, V74, P1402, DOI 10.1021/ac0110552
   Barnes CAS, 2007, MASS SPECTROM REV, V26, P370, DOI 10.1002/mas.20129
   Strickland I., 2012, WORLD PREVIEW 2018 E
   Syka JEP, 2004, P NATL ACAD SCI USA, V101, P9528, DOI 10.1073/pnas.0402700101
   Tang XT, 2010, MOL BIOSYST, V6, P939, DOI 10.1039/b920876c
   Tito MA, 2001, BIOPHYS J, V81, P3503, DOI 10.1016/S0006-3495(01)75981-4
   Tseng YH, 2011, ANAL CHEM, V83, P1960, DOI 10.1021/ac102676z
   Tsybin YO, 2011, ANAL CHEM, V83, P8919, DOI 10.1021/ac201293m
   Tu TT, 2010, J AM SOC MASS SPECTR, V21, P1660, DOI 10.1016/j.jasms.2010.03.030
   Uetrecht C, 2008, P NATL ACAD SCI USA, V105, P9216, DOI 10.1073/pnas.0800406105
   Uetrecht C, 2010, CHEM SOC REV, V39, P1633, DOI 10.1039/b914002f
   Uetrecht C, 2011, ANGEW CHEM INT EDIT, V50, P8248, DOI 10.1002/anie.201008120
   Valeja SG, 2011, ANAL CHEM, V83, P8391, DOI 10.1021/ac202429c
   Valliere-Douglass JF, 2012, ANAL CHEM, V84, P2843, DOI 10.1021/ac203346c
   van den Heuvel RHH, 2006, ANAL CHEM, V78, P7473, DOI 10.1021/ac061039a
   Wagner-Rousset E, 2008, J CHROMATOGR B, V872, P23, DOI 10.1016/j.jchromb.2008.03.032
   Wakankar A, 2011, MABS-AUSTIN, V3, P161, DOI 10.4161/mabs.3.2.14960
   Wales TE, 2006, MASS SPECTROM REV, V25, P158, DOI 10.1002/mas.20064
   Wales TE, 2008, ANAL CHEM, V80, P6815, DOI 10.1021/ac8008862
   Wang LT, 2005, PROTEIN SCI, V14, P2436, DOI 10.1110/ps.051478705
   Wang LT, 2005, PHARM RES-DORDR, V22, P1338, DOI 10.1007/s11095-005-5267-7
   Weis DD, 2006, J AM SOC MASS SPECTR, V17, P1700, DOI 10.1016/j.jasms.2006.07.025
   Winkler R, 2010, RAPID COMMUN MASS SP, V24, P285, DOI 10.1002/rcm.4384
   Wu Y, 2006, J AM SOC MASS SPECTR, V17, P163, DOI 10.1016/j.jasms.2005.10.009
   Xiao G, 2008, J PHARMACEUT BIOMED, V47, P23, DOI 10.1016/j.jpba.2007.11.050
   Xu K, 2011, ANAL BIOCHEM, V412, P56, DOI 10.1016/j.ab.2011.01.004
   Zhang A, 2012, PHARM RES-DORDR, V29, P236, DOI 10.1007/s11095-011-0538-y
   Zhang HZ, 2009, MOL CELL PROTEOMICS, V8, P409, DOI 10.1074/mcp.M800232-MCP200
   Zhang HM, 2009, J AM SOC MASS SPECTR, V20, P520, DOI 10.1016/j.jasms.2008.11.010
   Zhang Q, 2011, ANAL CHEM, V83, P7129, DOI 10.1021/ac201501z
   Zhang S, 2003, ANAL CHEM, V75, P3010, DOI 10.1021/ac034089d
   Zhang ZQ, 2012, ANAL CHEM, V84, P4942, DOI 10.1021/ac300535r
   Zhang ZQ, 2009, MASS SPECTROM REV, V28, P147, DOI 10.1002/mas.20190
NR 111
TC 39
Z9 39
U1 0
U2 74
PU ROYAL SOC CHEMISTRY
PI CAMBRIDGE
PA THOMAS GRAHAM HOUSE, SCIENCE PARK, MILTON RD, CAMBRIDGE CB4 0WF, CAMBS,
   ENGLAND
SN 1359-7345
EI 1364-548X
J9 CHEM COMMUN
JI Chem. Commun.
PY 2013
VL 49
IS 6
BP 538
EP 548
DI 10.1039/c2cc36755f
PG 11
WC Chemistry, Multidisciplinary
WE Science Citation Index Expanded (SCI-EXPANDED)
SC Chemistry
GA 052JN
UT WOS:000312194000001
PM 23183499
OA Green Published
DA 2022-04-10
ER

PT J
AU Reyes, GR
AF Reyes, GR
TI The nonstructural NS5A protein of hepatitis C virus: An expanding,
   multifunctional role in enhancing hepatitis C virus pathogenesis
SO JOURNAL OF BIOMEDICAL SCIENCE
LA English
DT Review
DE hepatitis C virus; NS5A; interferon-alpha; PKR; interferon
   sensitivity-determining region; viral pathogenesis
ID SENSITIVITY DETERMINING REGION; MAJOR PHOSPHORYLATION SITE; P53
   TUMOR-SUPPRESSOR; 5A PROTEIN; INTERFERON RESISTANCE;
   NUCLEAR-LOCALIZATION; signal transduction; ANTIVIRAL ACTION;
   GENE-EXPRESSION; CELL-LINE
AB The hepatitis C virus (HCV) NS5A gene product is a phosphorylated 56- to 58-kD nonstructural protein that displays a multitude of activities related to enhancement of viral pathogenesis. Although associated with other viral encoded proteins as part of the viral replicase complex positioned on the cytoplasmic side of the endoplasmic reticulum, a role for NS6A in viral replication has not been defined. post-translational modification of NS5A include phosphorylation and potential proteolytic processing to smaller molecular weight forms able to translocate to the nucleus. Both the identification of a putative interferon (IFN) sensitivity-determining region within NS5A, as well as the direct interaction with and inhibition of the IFN-induced double-stranded RNA-dependent protein kinase (PKR) by NS5A remain controversial. Truncated versions of NS5A can act as transcriptional activators, while other recently characterized interactions of NS5A with cellular proteins indicate its pleiotropic role in HCV-host interactions. NS5A itself has no direct effect on IFN-alpha signaling or activation, but other abundant interactions with members of the cellular signaling apparatus, transcription activation machinery and cell cycle-regulatory kinases have been described (e.g. growth factor receptor-bound protein 2, p53, p21/waf and cyclins). Many of these interactions block the apoptotic cellular response to persistent HCV infection. More recently, another altogether different mechanism attenuating the IFN-a response was reported based on induction of interleukin (IL)-8. IL-8, in model systems, potentiates viral replication and mutes the nonspecific intracellular IFN antiviral response. Evidence supporting a complex multimechanistic role of NS5A in promoting viral persistence, pathogenesis and, indirectly, viral-related hepatocarcinogenesis indicates its key role in HCV pathobiology. Copyright (C) 2002 National Science Council, ROC and S. Karger AG, Basel.
C1 Schering Plough Corp, Infect Dis Oncol, Kenilworth, NJ 07033 USA.
RP Reyes, GR (corresponding author), Schering Plough Corp, Infect Dis Oncol, 2015 Galloping Hill Rd, Kenilworth, NJ 07033 USA.
EM gregory.reyes@spcorp.com
CR Alter HJ, 2000, SEMIN LIVER DIS, V20, P17, DOI 10.1055/s-2000-9505
   Arima N, 2001, J BIOL CHEM, V276, P12675, DOI 10.1074/jbc.M008329200
   Asabe SI, 1997, J VIROL, V71, P790, DOI 10.1128/JVI.71.1.790-796.1997
   Balachandran S, 2000, J VIROL, V74, P1513, DOI 10.1128/JVI.74.3.1513-1523.2000
   Blight KJ, 2000, SCIENCE, V290, P1972, DOI 10.1126/science.290.5498.1972
   CHOO QL, 1989, SCIENCE, V244, P359, DOI 10.1126/science.2523562
   Chung KM, 1997, MOL CELLS, V7, P661
   DAVID M, 1995, SCIENCE, V269, P1721, DOI 10.1126/science.7569900
   Enomoto N, 1996, NEW ENGL J MED, V334, P77, DOI 10.1056/NEJM199601113340203
   ENOMOTO N, 1995, J CLIN INVEST, V96, P224, DOI 10.1172/JCI118025
   FATH I, 1994, SCIENCE, V264, P971, DOI 10.1126/science.8178156
   Francois C, 2000, J VIROL, V74, P5587, DOI 10.1128/JVI.74.12.5587-5596.2000
   Fretz H, 2000, CURR PHARM DESIGN, V6, P1777, DOI 10.2174/1381612003398546
   Fukuma T, 1998, HEPATOLOGY, V28, P1147, DOI 10.1002/hep.510280433
   Gale M, 1999, J VIROL, V73, P6506, DOI 10.1128/JVI.73.8.6506-6516.1999
   Gale MJ, 1997, VIROLOGY, V230, P217, DOI 10.1006/viro.1997.8493
   Ghosh AK, 2000, VIRUS RES, V67, P173, DOI 10.1016/S0168-1702(00)00141-6
   Ghosh AK, 1999, J GEN VIROL, V80, P1179, DOI 10.1099/0022-1317-80-5-1179
   Ghosh AK, 2000, J BIOL CHEM, V275, P7184, DOI 10.1074/jbc.275.10.7184
   Gong GZ, 2001, P NATL ACAD SCI USA, V98, P9599, DOI 10.1073/pnas.171311298
   Guo JT, 2001, J VIROL, V75, P8516, DOI 10.1128/JVI.75.18.8516-8523.2001
   He YP, 2001, J VIROL, V75, P5090, DOI 10.1128/JVI.75.11.5090-5098.2001
   Heim MH, 1999, J VIROL, V73, P8469, DOI 10.1128/JVI.73.10.8469-8475.1999
   Herion D, 1997, HEPATOLOGY, V25, P769, DOI 10.1002/hep.510250346
   HIJIKATA M, 1993, P NATL ACAD SCI USA, V90, P10773, DOI 10.1073/pnas.90.22.10773
   Hirota M, 1999, VIROLOGY, V257, P130, DOI 10.1006/viro.1999.9658
   Hu KQ, 2001, J VIRAL HEPATITIS, V8, P1, DOI 10.1046/j.1365-2893.2001.00253.x
   Hummer BT, 2001, J VIROL, V75, P7774, DOI 10.1128/JVI.75.16.7774-7777.2001
   Ide Y, 1997, GENE, V201, P151, DOI 10.1016/S0378-1119(97)00440-X
   Ide Y, 1996, GENE, V182, P203, DOI 10.1016/S0378-1119(96)00555-0
   Jaeckel E, 2001, NEW ENGL J MED, V345, P1452, DOI 10.1056/NEJMoa011232
   Johnston H, 1999, J BIOL CHEM, V274, P16370, DOI 10.1074/jbc.274.23.16370
   KANEKO T, 1994, BIOCHEM BIOPH RES CO, V205, P320, DOI 10.1006/bbrc.1994.2667
   KAPOOR M, 1995, J BIOL CHEM, V270, P19100, DOI 10.1074/jbc.270.32.19100
   Kato N, 1997, J VIROL, V71, P8856, DOI 10.1128/JVI.71.11.8856-8859.1997
   Kato Nobuyuki, 2000, Microbial and Comparative Genomics, V5, P129, DOI 10.1089/omi.1.2000.5.129
   Katze MG, 2000, VIROLOGY, V278, P501, DOI 10.1006/viro.2000.0662
   Khabar KSA, 1997, BIOCHEM BIOPH RES CO, V235, P774, DOI 10.1006/bbrc.1997.6872
   Khabar KSA, 1997, J EXP MED, V186, P1077, DOI 10.1084/jem.186.7.1077
   Kim J, 1999, BIOCHEM BIOPH RES CO, V257, P777, DOI 10.1006/bbrc.1999.0460
   Lane BR, 2001, J VIROL, V75, P5812, DOI 10.1128/JVI.75.13.5812-5822.2001
   Lemon S M, 2000, Trans Am Clin Climatol Assoc, V111, P146
   Lohmann V, 2001, J VIROL, V75, P1437, DOI 10.1128/JVI.75.3.1437-1449.2001
   Lohmann V, 1999, SCIENCE, V285, P110, DOI 10.1126/science.285.5424.110
   Majumder M, 2001, J VIROL, V75, P1401, DOI 10.1128/JVI.75.3.1401-1407.2001
   Manns MP, 2001, LANCET, V358, P958, DOI 10.1016/S0140-6736(01)06102-5
   MILLER RH, 1990, P NATL ACAD SCI USA, V87, P2057, DOI 10.1073/pnas.87.6.2057
   Mukaida N, 1998, CYTOKINE GROWTH F R, V9, P9, DOI 10.1016/S1359-6101(97)00022-1
   Murayama T, 1997, J VIROL, V71, P5692, DOI 10.1128/JVI.71.7.5692-5695.1997
   Nakamura H, 2001, J VIROL, V75, P7572, DOI 10.1128/JVI.75.16.7572-7582.2001
   Neddermann P, 1999, J VIROL, V73, P9984, DOI 10.1128/JVI.73.12.9984-9991.1999
   Neuman MG, 2001, CLIN BIOCHEM, V34, P173, DOI 10.1016/S0009-9120(01)00212-0
   Parcells MS, 2001, J VIROL, V75, P5159, DOI 10.1128/JVI.75.11.5159-5173.2001
   Pawlotsky JM, 1999, J VIRAL HEPATITIS, V6, P343, DOI 10.1046/j.1365-2893.1999.00185.x
   Podevin P, 2001, HEPATOLOGY, V33, P1503, DOI 10.1053/jhep.2001.24749
   Polyak SJ, 2001, J VIROL, V75, P6095, DOI 10.1128/JVI.75.13.6095-6106.2001
   Polyak SJ, 2001, J VIROL, V75, P6209, DOI 10.1128/JVI.75.13.6209-6211.2001
   Reed KE, 1999, J BIOL CHEM, V274, P28011, DOI 10.1074/jbc.274.39.28011
   Reed KE, 1997, J VIROL, V71, P7187, DOI 10.1128/JVI.71.10.7187-7197.1997
   Satoh S, 2000, VIROLOGY, V270, P476, DOI 10.1006/viro.2000.0287
   Song J, 2000, VIRUS RES, V69, P109, DOI 10.1016/S0168-1702(00)00206-9
   SUN Y, 1990, FREE RADICAL BIO MED, V8, P583, DOI 10.1016/0891-5849(90)90156-D
   Tai DI, 2000, HEPATOLOGY, V31, P656, DOI 10.1002/hep.510310316
   Takada S, 1997, ONCOGENE, V15, P1895, DOI 10.1038/sj.onc.1201369
   Tan SL, 1999, P NATL ACAD SCI USA, V96, P5533, DOI 10.1073/pnas.96.10.5533
   Tan SL, 2001, VIROLOGY, V284, P1, DOI 10.1006/viro.2001.0885
   Tanimoto A, 1997, BIOCHEM BIOPH RES CO, V236, P360, DOI 10.1006/bbrc.1997.6967
   TANJI Y, 1995, J VIROL, V69, P3980, DOI 10.1128/JVI.69.7.3980-3986.1995
   Taylor DR, 1999, SCIENCE, V285, P107, DOI 10.1126/science.285.5424.107
   Taylor DR, 2001, HEPATOLOGY, V33, P1547, DOI 10.1053/jhep.2001.25447
   Terrault N A, 2000, Semin Gastrointest Dis, V11, P96
   Tu H, 1999, VIROLOGY, V263, P30, DOI 10.1006/viro.1999.9893
   Vogelstein B, 2000, NATURE, V408, P307, DOI 10.1038/35042675
   Walewski JL, 2001, RNA, V7, P710, DOI 10.1017/S1355838201010111
   Wasley A, 2000, SEMIN LIVER DIS, V20, P1, DOI 10.1055/s-2000-9506
   Xu ZM, 2001, EMBO J, V20, P3840, DOI 10.1093/emboj/20.14.3840
NR 76
TC 77
Z9 82
U1 0
U2 6
PU BMC
PI LONDON
PA CAMPUS, 4 CRINAN ST, LONDON N1 9XW, ENGLAND
SN 1021-7770
EI 1423-0127
J9 J BIOMED SCI
JI J. Biomed. Sci.
PD MAY-JUN
PY 2002
VL 9
IS 3
BP 187
EP 197
DI 10.1159/000059419
PG 11
WC Cell Biology; Medicine, Research & Experimental
WE Science Citation Index Expanded (SCI-EXPANDED)
SC Cell Biology; Research & Experimental Medicine
GA 563DJ
UT WOS:000176239500001
PM 12065893
DA 2022-04-10
ER

PT J
AU Bilotta, A
   Dattilo, V
   D'Agostino, S
   Belviso, S
   Scalise, S
   Bilotta, M
   Gaudio, E
   Paduano, F
   Perrotti, N
   Florio, T
   Fusco, A
   Iuliano, R
   Trapasso, F
AF Bilotta, Anna
   Dattilo, Vincenzo
   D'Agostino, Sabrina
   Belviso, Stefania
   Scalise, Stefania
   Bilotta, Mariaconcetta
   Gaudio, Eugenio
   Paduano, Francesco
   Perrotti, Nicola
   Florio, Tullio
   Fusco, Alfredo
   Iuliano, Rodolfo
   Trapasso, Francesco
TI A novel splice variant of the protein tyrosine phosphatase PTPRJ that
   encodes for a soluble protein involved in angiogenesis
SO ONCOTARGET
LA English
DT Article
DE protein tyrosine phosphatase; soluble isoform; angiogenesis;
   glioblastoma; angiogenic factor
ID IN-VITRO; SOMATOSTATIN INHIBITION; ETA SUPPRESSES; CELL-GROWTH;
   RECEPTOR; EXPRESSION; GLYCOSYLATION; CD148; GAMMA; VEGF
AB PTPRJ is a receptor protein tyrosine phosphatase with tumor suppressor activity. Very little is known about the role of PTPRJ ectodomain, although recently both physiological and synthetic PTPRJ ligands have been identified. A putative shorter spliced variant, coding for a 539 aa protein corresponding to the extracellular N-terminus of PTPRJ, is reported in several databases but, currently, no further information is available.
   Here, we confirmed that the PTPRJ short isoform (named sPTPRJ) is a soluble protein secreted into the supernatant of both endothelial and tumor cells. Like PTPRJ, also sPTPRJ undergoes post-translational modification such as glycosylation, as assessed by sPTPRJ immunoprecipitation. To characterize its functional activity, we performed an endothelial cell tube formation assay and a wound healing assay on HUVEC cells overexpressing sPTPRJ and we found that sPTPRJ has a proangiogenic activity. We also showed that sPTPRJ expression down-regulates endothelial adhesion molecules, that is a hallmark of proangiogenic activity. Moreover, sPTPRJ mRNA levels in human high-grade glioma, one of the most angiogenic tumors, are higher in tumor samples compared to controls. Further studies will be helpful not only to clarify the way sPTPRJ works but also to supply clues to circumvent its activity in cancer therapy.
C1 [Bilotta, Anna; D'Agostino, Sabrina; Belviso, Stefania; Scalise, Stefania; Bilotta, Mariaconcetta; Gaudio, Eugenio; Paduano, Francesco; Iuliano, Rodolfo; Trapasso, Francesco] Magna Graecia Univ Catanzaro, Dept Med Sperimentale & Clin, Catanzaro, Italy.
   [Dattilo, Vincenzo; Perrotti, Nicola] Magna Graecia Univ Catanzaro, Dept Sci Salute, Catanzaro, Italy.
   [Gaudio, Eugenio] IOR, Lymphoma & Genom Res Program, Bellinzona, Switzerland.
   [Paduano, Francesco] Tecnol Res Inst, Biomed Sect, Crotone, Italy.
   [Florio, Tullio] Univ Genoa, Dept Internal Med, Pharmacol Lab, Genoa, Italy.
   [Florio, Tullio] Univ Genoa, CEBR, Genoa, Italy.
   [Fusco, Alfredo] Univ Federico II Napoli, CNR, Ist Endocrinol & Oncol Sperimentale, Dipartimento Med Mol & Biotecnol Med, Naples, Italy.
RP Iuliano, R; Trapasso, F (corresponding author), Magna Graecia Univ Catanzaro, Dept Med Sperimentale & Clin, Catanzaro, Italy.
EM iuliano@unicz.it; trapasso@unicz.it
RI Florio, Tullio/A-2211-2012; FLORIO, TULLIO/ABG-3182-2020; BILOTTA,
   Mariaconcetta/Y-7508-2019; Scalise, Stefania/ABC-5704-2021; Paduano,
   Francesco/A-2548-2015; Dattilo, Vincenzo/AAB-3167-2020
OI Florio, Tullio/0000-0002-2394-996X; BILOTTA,
   Mariaconcetta/0000-0002-1156-4878; Scalise,
   Stefania/0000-0001-6979-1486; Paduano, Francesco/0000-0003-0916-8101;
   Dattilo, Vincenzo/0000-0001-8493-6188; D'Agostino,
   Sabrina/0000-0002-4858-8873
FU Fondazione Universita Magna Graecia of Catanzaro
FX The present study was supported by the Fondazione Universita Magna
   Graecia of Catanzaro. This paper is dedicated to the memory of C.
   Stillitani; a special thanks is addressed to his family that has
   sustained research.
CR Autschbach F, 1999, TISSUE ANTIGENS, V54, P485, DOI 10.1034/j.1399-0039.1999.540506.x
   BARNEA G, 1993, MOL CELL BIOL, V13, P1497, DOI 10.1128/MCB.13.3.1497
   Berset TA, 2005, GENE DEV, V19, P1328, DOI 10.1101/gad.333505
   Brunner PM, 2011, BLOOD, V117, P4154, DOI 10.1182/blood-2010-09-307694
   Chabot C, 2009, MOL CELL BIOL, V29, P241, DOI 10.1128/MCB.01374-08
   Chaudhry IH, 2001, HISTOPATHOLOGY, V39, P409, DOI 10.1046/j.1365-2559.2001.01230.x
   Das S, 2013, NEW ENGL J MED, V369, P1561, DOI 10.1056/NEJMcibr1309402
   Dieterich LC, 2012, J PATHOL, V228, P378, DOI 10.1002/path.4072
   DUKSIN D, 1977, J BIOL CHEM, V252, P955
   Dwyer CA, 2012, NEUROSCIENCE, V220, P47, DOI 10.1016/j.neuroscience.2012.06.026
   Fournier P, 2016, CANCER RES, V76, P5080, DOI 10.1158/0008-5472.CAN-16-1071
   GAHMBERG CG, 1980, J BIOL CHEM, V255, P2169
   Gaudio E, 2016, ONCOTARGET, V7, P29927, DOI 10.18632/oncotarget.9179
   Griffioen AW, 1996, CANCER RES, V56, P1111
   HEANEY ML, 1993, BLOOD, V82, P1945, DOI 10.1182/blood.V82.7.1945.bloodjournal8271945
   Heaney ML, 1998, J LEUKOCYTE BIOL, V64, P135, DOI 10.1002/jlb.64.2.135
   HONDA H, 1994, BLOOD, V84, P4186, DOI 10.1182/blood.V84.12.4186.bloodjournal84124186
   Iervolino A, 2006, CANCER RES, V66, P6280, DOI 10.1158/0008-5472.CAN-06-0228
   Iruela-Arispe ML, 1999, CIRCULATION, V100, P1423, DOI 10.1161/01.CIR.100.13.1423
   Iuliano R, 2003, CANCER RES, V63, P882
   Iuliano R, 2009, J BIOCHEM, V145, P377, DOI 10.1093/jb/mvn175
   Jain RK, 2007, NAT REV NEUROSCI, V8, P610, DOI 10.1038/nrn2175
   Kovalenko M, 2000, J BIOL CHEM, V275, P16219, DOI 10.1074/jbc.275.21.16219
   Lampugnani MG, 2006, J CELL BIOL, V174, P593, DOI 10.1083/jcb.200602080
   Lampugnani MG, 2003, J CELL BIOL, V161, P793, DOI 10.1083/jcb.200209019
   Levine SJ, 2004, J IMMUNOL, V173, P5343, DOI 10.4049/jimmunol.173.9.5343
   Lund EL, 2004, INT J CANCER, V108, P833, DOI 10.1002/ijc.11662
   Massa A, 2004, ANN NY ACAD SCI, V1030, P264, DOI 10.1196/annals.1329.033
   Massa A, 2004, J BIOL CHEM, V279, P29004, DOI 10.1074/jbc.M403573200
   Modrek B, 2002, NAT GENET, V30, P13, DOI 10.1038/ng0102-13
   Moratti E, 2015, PLOS ONE, V10, DOI 10.1371/journal.pone.0119110
   MullerNewen G, 1996, INT ARCH ALLERGY IMM, V111, P99, DOI 10.1159/000237353
   Ortuso F, 2013, ACS CHEM BIOL, V8, P1497, DOI 10.1021/cb3007192
   Ostman A, 2006, NAT REV CANCER, V6, P307, DOI 10.1038/nrc1837
   OSTMAN A, 1994, P NATL ACAD SCI USA, V91, P9680, DOI 10.1073/pnas.91.21.9680
   Paduano F, 2013, FEBS J, V280, P401, DOI 10.1111/j.1742-4658.2012.08624.x
   Paduano F, 2012, ACS CHEM BIOL, V7, P1666, DOI 10.1021/cb300281t
   Palka HL, 2003, J BIOL CHEM, V278, P5728, DOI 10.1074/jbc.M210656200
   Pinho SS, 2015, NAT REV CANCER, V15, P540, DOI 10.1038/nrc3982
   Rodriguez F, 2008, DEV BIOL, V324, P122, DOI 10.1016/j.ydbio.2008.09.011
   Sakurai T, 1996, J NEUROSCI RES, V43, P694, DOI 10.1002/(SICI)1097-4547(19960315)43:6<694::AID-JNR6>3.3.CO;2-9
   SARENEVA T, 1994, BIOCHEM J, V303, P831, DOI 10.1042/bj3030831
   Schlesinger M, 2015, INT J CANCER, V136, P2504, DOI 10.1002/ijc.28927
   Shintani T, 1997, BIOCHEM BIOPH RES CO, V230, P419, DOI 10.1006/bbrc.1996.5973
   Soller M, 2006, CELL MOL LIFE SCI, V63, P796, DOI 10.1007/s00018-005-5391-x
   SORIO C, 1995, CANCER RES, V55, P4855
   Spring K, 2012, BLOOD, V120, P2745, DOI 10.1182/blood-2011-12-398040
   Takahashi K, 2012, P NATL ACAD SCI USA, V109, P1985, DOI 10.1073/pnas.1106171109
   Takahashi T, 2006, BLOOD, V108, P1234, DOI 10.1182/blood-2005-10-4296
   Trapasso F, 2004, CARCINOGENESIS, V25, P2107, DOI 10.1093/carcin/bgh224
   Trapasso F, 2000, MOL CELL BIOL, V20, P9236, DOI 10.1128/MCB.20.24.9236-9246.2000
   Vandesompele J, 2002, GENOME BIOL, V3, DOI 10.1186/gb-2002-3-7-research0034
   Weathers SP, 2015, ONCOLOGY-NY, V29, P720
   Whiteford JR, 2011, MOL BIOL CELL, V22, P3609, DOI 10.1091/mbc.E11-02-0099
   Xu CC, 2015, NAT REV MOL CELL BIO, V16, P742, DOI 10.1038/nrm4073
   Zhang L, 1997, EXP CELL RES, V235, P62, DOI 10.1006/excr.1997.3659
NR 56
TC 3
Z9 3
U1 0
U2 4
PU IMPACT JOURNALS LLC
PI ORCHARD PARK
PA 6666 E QUAKER ST, STE 1, ORCHARD PARK, NY 14127 USA
EI 1949-2553
J9 ONCOTARGET
JI Oncotarget
PD FEB 7
PY 2017
VL 8
IS 6
BP 10091
EP 10102
DI 10.18632/oncotarget.14350
PG 12
WC Oncology; Cell Biology
WE Science Citation Index Expanded (SCI-EXPANDED)
SC Oncology; Cell Biology
GA EK8NX
UT WOS:000394181800097
PM 28052032
OA Green Published, gold, Green Submitted
DA 2022-04-10
ER

PT J
AU Goncalves, V
   Pereira, JFS
   Jordan, P
AF Goncalves, Vania
   Pereira, Joana F. S.
   Jordan, Peter
TI signaling pathway Driving Aberrant Splicing in Cancer Cells
SO GENES
LA English
DT Review
DE alternative splicing; cancer cell; genetic program; signaling pathway;
   tumorigenesis; tumor microenvironment
ID C-BETA-II; SR PROTEIN-PHOSPHORYLATION; KLF6 TUMOR-SUPPRESSOR;
   MESSENGER-RNA; HNRNP A1; DEPENDENT REGULATION; NUCLEAR; BINDING;
   EXPRESSION; GROWTH
AB Aberrant profiles of pre-mRNA splicing are frequently observed in cancer. At the molecular level, an altered profile results from a complex interplay between chromatin modifications, the transcriptional elongation rate of RNA polymerase, and effective binding of the spliceosome to the generated transcripts. Key players in this interplay are regulatory splicing factors (SFs) that bind to gene-specific splice-regulatory sequence elements. Although mutations in genes of some SFs were described, a major driver of aberrant splicing profiles is oncogenic signal transduction pathways. Signaling can affect either the transcriptional expression levels of SFs or the post-translational modification of SF proteins, and both modulate the ratio of nuclear versus cytoplasmic SFs in a given cell. Here, we will review currently known mechanisms by which cancer cell signaling, including the mitogen-activated protein kinases (MAPK), phosphatidylinositol 3 (PI3)-kinase pathway (PI3K) and wingless (Wnt) pathways but also signals from the tumor microenvironment, modulate the activity or subcellular localization of the Ser/Arg rich (SR) proteins and heterogeneous nuclear ribonucleoproteins (hnRNPs) families of SFs.
C1 [Goncalves, Vania; Pereira, Joana F. S.; Jordan, Peter] Inst Nacl Saude Doutor Ricardo Jorge, Dept Human Genet, Ave Padre Cruz, P-1649016 Lisbon, Portugal.
   [Goncalves, Vania; Pereira, Joana F. S.; Jordan, Peter] Univ Lisbon, Fac Sci, BioISI Biosyst & Integrat Sci Inst, P-1649004 Lisbon, Portugal.
RP Jordan, P (corresponding author), Inst Nacl Saude Doutor Ricardo Jorge, Dept Human Genet, Ave Padre Cruz, P-1649016 Lisbon, Portugal.; Jordan, P (corresponding author), Univ Lisbon, Fac Sci, BioISI Biosyst & Integrat Sci Inst, P-1649004 Lisbon, Portugal.
EM vania.goncalves@insa.min-saude.pt; joana.pereira@insa.min-saude.pt;
   peter.jordan@insa.min-saude.pt
RI Sousa Pereira, Joana Filipa de Filipa/AAW-4272-2021; Jordan,
   Peter/G-9335-2012; Gonçalves, Vânia Marina Cristóvão/Q-1749-2015
OI Sousa Pereira, Joana Filipa de Filipa/0000-0001-7463-1137; Jordan,
   Peter/0000-0002-1425-9211; Gonçalves, Vânia Marina
   Cristóvão/0000-0003-1934-4279
FU Fundacao para a Ciencia e Tecnologia (FCT)Portuguese Foundation for
   Science and TechnologyEuropean Commission [UID/MULTI/04046/2013,
   SFRH/BD/109162/2015]; Portuguese association Maratona da Saude - Cancro
FX Work in the authors' laboratory was supported by Fundacao para a Ciencia
   e Tecnologia (FCT) [plurianual grant UID/MULTI/04046/2013 to the
   research unit BioISI and fellowship SFRH/BD/109162/2015 to JFSP] and by
   the Portuguese association Maratona da Saude - Cancro 2014 to PJ.
CR Abdel-Wahab O, 2011, CANCER CELL, V20, P420, DOI 10.1016/j.ccr.2011.10.004
   Aguilera O, 2016, ONCOTARGET, V7, P47954, DOI 10.18632/oncotarget.10087
   Al-Ayoubi AM, 2012, MOL CELL BIOL, V32, P2880, DOI 10.1128/MCB.06327-11
   Allemand E, 2005, P NATL ACAD SCI USA, V102, P3605, DOI 10.1073/pnas.0409889102
   Amin EM, 2011, CANCER CELL, V20, P768, DOI 10.1016/j.ccr.2011.10.016
   Aung CS, 2009, CARCINOGENESIS, V30, P1962, DOI 10.1093/carcin/bgp223
   Barash Y, 2010, NATURE, V465, P53, DOI 10.1038/nature09000
   Barbosa-Morais NL, 2006, GENOME RES, V16, P66, DOI 10.1101/gr.3936206
   Biamonti G, 2012, CELL MOL LIFE SCI, V69, P2515, DOI 10.1007/s00018-012-0931-7
   Bissell MJ, 2011, NAT MED, V17, P320, DOI 10.1038/nm.2328
   Blaustein M, 2005, NAT STRUCT MOL BIOL, V12, P1037, DOI 10.1038/nsmb1020
   Bonomi S, 2013, NUCLEIC ACIDS RES, V41, P8665, DOI 10.1093/nar/gkt579
   Bordeleau F, 2015, P NATL ACAD SCI USA, V112, P8314, DOI 10.1073/pnas.1505421112
   Braunschweig U, 2014, GENOME RES, V24, P1774, DOI 10.1101/gr.177790.114
   Buljan M, 2012, MOL CELL, V46, P871, DOI 10.1016/j.molcel.2012.05.039
   Caretta Antonio, 2011, Cancers (Basel), V3, P913, DOI 10.3390/cancers3010913
   Castello A, 2012, CELL, V149, P1393, DOI 10.1016/j.cell.2012.04.031
   Castle JC, 2008, NAT GENET, V40, P1416, DOI 10.1038/ng.264
   Chandra M, 2012, MOL CELL BIOL, V32, P2183, DOI 10.1128/MCB.00320-12
   Chen M, 2009, NAT REV MOL CELL BIO, V10, P741, DOI 10.1038/nrm2777
   Convertini P, 2014, NUCLEIC ACIDS RES, V42, P4947, DOI 10.1093/nar/gku151
   Cornu M, 2013, CURR OPIN GENET DEV, V23, P53, DOI 10.1016/j.gde.2012.12.005
   David CJ, 2010, GENE DEV, V24, P2343, DOI 10.1101/gad.1973010
   de Miguel FJ, 2014, CANCER RES, V74, P1105, DOI 10.1158/0008-5472.CAN-13-1481
   Dery KJ, 2014, MOL CANCER, V13, DOI 10.1186/1476-4598-13-64
   Diederichs S, 2016, EMBO MOL MED, V8, P442, DOI 10.15252/emmm.201506055
   Dvinge H, 2016, NAT REV CANCER, V16, P413, DOI 10.1038/nrc.2016.51
   Edmond V, 2011, EMBO J, V30, P510, DOI 10.1038/emboj.2010.333
   Eissa NT, 1996, J BIOL CHEM, V271, P27184, DOI 10.1074/jbc.271.43.27184
   Ellis JD, 2012, MOL CELL, V46, P884, DOI 10.1016/j.molcel.2012.05.037
   Gallego-Paez LM, 2017, HUM GENET, V136, P1015, DOI 10.1007/s00439-017-1790-y
   Ghigna C, 1998, CANCER RES, V58, P5818
   Ghigna C, 2008, CURR GENOMICS, V9, P556, DOI 10.2174/138920208786847971
   Ghosh G, 2011, FEBS J, V278, P587, DOI 10.1111/j.1742-4658.2010.07992.x
   Goehe RW, 2010, J CLIN INVEST, V120, P3923, DOI 10.1172/JCI43552
   Gokmen-Polar Y, 2001, CANCER RES, V61, P1375
   Goncalves V., IBUPROFEN DOWNREGULA
   Goncalves V, 2014, RNA, V20, P474, DOI 10.1261/rna.041376.113
   Goncalves V, 2009, HUM MOL GENET, V18, P3696, DOI 10.1093/hmg/ddp317
   Goncalves V, 2008, RNA, V14, P2538, DOI 10.1261/rna.1253408
   Grosso AR, 2008, EMBO REP, V9, P1087, DOI 10.1038/embor.2008.189
   Grosso AR, 2008, NUCLEIC ACIDS RES, V36, P4823, DOI 10.1093/nar/gkn463
   Guil S, 2006, MOL CELL BIOL, V26, P5744, DOI 10.1128/MCB.00224-06
   Hanahan D, 2011, CELL, V144, P646, DOI 10.1016/j.cell.2011.02.013
   Hernandez F, 2004, J BIOL CHEM, V279, P3801, DOI 10.1074/jbc.M311512200
   Heyd F, 2010, MOL CELL, V40, P126, DOI 10.1016/j.molcel.2010.09.013
   Himeji D, 2002, BLOOD, V99, P4070, DOI 10.1182/blood.V99.11.4070
   Hollander D, 2016, GENOME RES, V26, P541, DOI 10.1101/gr.193169.115
   Horiguchi K, 2012, ONCOGENE, V31, P3190, DOI 10.1038/onc.2011.493
   Ishii H, 2014, J BIOL CHEM, V289, P27386, DOI 10.1074/jbc.M114.589432
   Jacob AG, 2014, PLOS ONE, V9, DOI 10.1371/journal.pone.0104444
   Jakubauskiene E, 2015, J BIOL CHEM, V290, P18079, DOI 10.1074/jbc.M115.639690
   Jiang K, 2009, ENDOCRINOLOGY, V150, P2087, DOI 10.1210/en.2008-0818
   Karakas B, 2006, BRIT J CANCER, V94, P455, DOI 10.1038/sj.bjc.6602970
   Karni R, 2007, NAT STRUCT MOL BIOL, V14, P185, DOI 10.1038/nsmb1209
   Lareau LF, 2007, NATURE, V446, P926, DOI 10.1038/nature05676
   Lee G, 2017, CELL, V171, P1545, DOI 10.1016/j.cell.2017.10.037
   Lee Y, 2015, ANNU REV BIOCHEM, V84, P291, DOI 10.1146/annurev-biochem-060614-034316
   Leight JL, 2017, ANNU REV CANC BIOL, V1, P313, DOI 10.1146/annurev-cancerbio-050216-034431
   Li CY, 2004, CELL RES, V14, P473, DOI 10.1038/sj.cr.7290250
   Liu GD, 2012, J BIOL CHEM, V287, P22709, DOI 10.1074/jbc.M112.357343
   Logue JS, 2012, GENE DEV, V26, P641, DOI 10.1101/gad.186965.112
   Lu PF, 2012, J CELL BIOL, V196, P395, DOI 10.1083/jcb.201102147
   Madan V, 2015, NAT COMMUN, V6, DOI 10.1038/ncomms7042
   Malakar P, 2016, SCI REP-UK, V6, DOI 10.1038/srep31222
   Matera AG, 2014, NAT REV MOL CELL BIO, V15, P108, DOI 10.1038/nrm3742
   Matos P, 2008, GASTROENTEROLOGY, V135, P899, DOI 10.1053/j.gastro.2008.05.052
   Matos P, 2013, NEOPLASIA, V15, P102, DOI 10.1593/neo.121890
   Matter N, 2002, NATURE, V420, P691, DOI 10.1038/nature01153
   Mayr C, 2009, CELL, V138, P673, DOI 10.1016/j.cell.2009.06.016
   Monteith GR, 2012, J BIOL CHEM, V287, P31666, DOI 10.1074/jbc.R112.343061
   Munoz MJ, 2017, CELL REP, V18, P2868, DOI 10.1016/j.celrep.2017.02.066
   Munoz U, 2012, MOL CANCER RES, V10, P1216, DOI 10.1158/1541-7786.MCR-12-0213
   Mylonis I, 2003, BIOCHEM BIOPH RES CO, V301, P650, DOI 10.1016/S0006-291X(02)03055-3
   Ngo JCK, 2005, MOL CELL, V20, P77, DOI 10.1016/j.molcel.2005.08.025
   Ni JZ, 2007, GENE DEV, V21, P708, DOI 10.1101/gad.1525507
   Nilsen TW, 2010, NATURE, V463, P457, DOI 10.1038/nature08909
   Nowak DG, 2010, J BIOL CHEM, V285, P5532, DOI 10.1074/jbc.M109.074930
   Ogorodnikov A, 2016, PFLUG ARCH EUR J PHY, V468, P993, DOI 10.1007/s00424-016-1828-3
   Ortis F, 2010, DIABETES, V59, P358, DOI 10.2337/db09-1159
   Pan Q, 2008, NAT GENET, V40, P1413, DOI 10.1038/ng.259
   Pandit S, 2013, MOL CELL, V50, P223, DOI 10.1016/j.molcel.2013.03.001
   Patel NA, 2005, J BIOL CHEM, V280, P14302, DOI 10.1074/jbc.M411485200
   Patel NA, 2001, J BIOL CHEM, V276, P22648, DOI 10.1074/jbc.M101260200
   Pelisch F, 2005, J BIOL CHEM, V280, P25461, DOI 10.1074/jbc.M412007200
   Pelisch F, 2012, J CELL BIOCHEM, V113, P2319, DOI 10.1002/jcb.24103
   Prasad S, 2016, OXID MED CELL LONGEV, V2016, DOI 10.1155/2016/5010423
   Radisky DC, 2005, NATURE, V436, P123, DOI 10.1038/nature03688
   Rubashkin MG, 2014, BIOCHEMISTRY-US, V53, P2078, DOI 10.1021/bi401710d
   Saitoh N, 2012, MOL BIOL CELL, V23, P1115, DOI 10.1091/mbc.E11-09-0783
   Sakamoto Y, 1997, ONCOGENE, V15, P2001, DOI 10.1038/sj.onc.1201391
   Scott LM, 2013, JNCI-J NATL CANCER I, V105, P1540, DOI 10.1093/jnci/djt257
   Scotti MM, 2016, NAT REV GENET, V17, P19, DOI 10.1038/nrg.2015.3
   Semenza GL, 2013, J CLIN INVEST, V123, P3664, DOI 10.1172/JCI67230
   Sena JA, 2014, MOL CANCER RES, V12, P1233, DOI 10.1158/1541-7786.MCR-14-0149
   Shilo A, 2014, RNA, V20, P505, DOI 10.1261/rna.042259.113
   Shinde MY, 2017, J BIOL CHEM, V292, P18240, DOI 10.1074/jbc.M117.813527
   Shultz JC, 2010, CANCER RES, V70, P9185, DOI 10.1158/0008-5472.CAN-10-1545
   Srebrow A, 2006, J CELL SCI, V119, P2635, DOI 10.1242/jcs.03053
   Sveen A, 2016, ONCOGENE, V35, P2413, DOI 10.1038/onc.2015.318
   Takahashi H, 2015, MOL CANCER THER, V14, P1705, DOI 10.1158/1535-7163.MCT-14-0142
   Takeo K, 2009, AM J PHYSIOL-CELL PH, V297, pC330, DOI 10.1152/ajpcell.00009.2009
   Thorsen K, 2011, MOL CELL PROTEOMICS, V10, DOI 10.1074/mcp.M110.002998
   Trembley JH, 2009, CELL MOL LIFE SCI, V66, P1858, DOI 10.1007/s00018-009-9154-y
   Valacca C, 2010, J CELL BIOL, V191, P87, DOI 10.1083/jcb.201001073
   van Oordt WV, 2000, J CELL BIOL, V149, P307, DOI 10.1083/jcb.149.2.307
   Vecchione L, 2016, CELL, V165, P317, DOI 10.1016/j.cell.2016.02.059
   Venables JP, 2006, BIOESSAYS, V28, P378, DOI 10.1002/bies.20390
   Voukkalis N, 2016, PLOS ONE, V11, DOI 10.1371/journal.pone.0154198
   Vu NT, 2013, J BIOL CHEM, V288, P8575, DOI 10.1074/jbc.M112.443333
   Wahl MC, 2009, CELL, V136, P701, DOI 10.1016/j.cell.2009.02.009
   Wang ET, 2008, NATURE, V456, P470, DOI 10.1038/nature07509
   Warzecha CC, 2010, EMBO J, V29, P3286, DOI 10.1038/emboj.2010.195
   Weatheritt RJ, 2016, NAT STRUCT MOL BIOL, V23, P1117, DOI 10.1038/nsmb.3317
   Weg-Remers S, 2001, EMBO J, V20, P4194, DOI 10.1093/emboj/20.15.4194
   Witsch E, 2010, PHYSIOLOGY, V25, P85, DOI 10.1152/physiol.00045.2009
   Xargay-Torrent S, 2015, ONCOTARGET, V6, P22734, DOI 10.18632/oncotarget.4212
   Xie JY, 2003, P NATL ACAD SCI USA, V100, P8776, DOI 10.1073/pnas.1432696100
   Yang L, 2007, LEUKEMIA, V21, P868, DOI 10.1038/sj.leu.2404624
   Yea S, 2008, GASTROENTEROLOGY, V134, P1521, DOI 10.1053/j.gastro.2008.02.015
   Yu JK, 2009, J BIOL CHEM, V284, P1505, DOI 10.1074/jbc.M805113200
   Zhan T, 2017, ONCOGENE, V36, P1461, DOI 10.1038/onc.2016.304
   Zhong XY, 2009, GENE DEV, V23, P482, DOI 10.1101/gad.1752109
   Zhou ZH, 2012, MOL CELL, V47, P422, DOI 10.1016/j.molcel.2012.05.014
NR 124
TC 28
Z9 28
U1 0
U2 5
PU MDPI
PI BASEL
PA ST ALBAN-ANLAGE 66, CH-4052 BASEL, SWITZERLAND
SN 2073-4425
J9 GENES-BASEL
JI Genes
PD JAN
PY 2018
VL 9
IS 1
AR 9
DI 10.3390/genes9010009
PG 17
WC Genetics & Heredity
WE Science Citation Index Expanded (SCI-EXPANDED)
SC Genetics & Heredity
GA FU8PQ
UT WOS:000424116500009
PM 29286307
OA Green Published, gold, Green Submitted
DA 2022-04-10
ER

PT J
AU Tng, SS
   Le, NQK
   Yeh, HY
   Chua, MCH
AF Tng, Sian Soo
   Le, Nguyen Quoc Khanh
   Yeh, Hui-Yuan
   Chua, Matthew Chin Heng
TI Improved Prediction Model of Protein Lysine Crotonylation Sites Using
   Bidirectional Recurrent Neural Networks
SO JOURNAL OF PROTEOME RESEARCH
LA English
DT Article
DE lysine crotonylation pathway; deep learning; recurrent neural network;
   bidirectional long short-term memory; gated recurrent unit;
   post-translational modification; protein sequence; bioinformatics;
   computational biology
ID post-translational modification; HISTONE CROTONYLATION; SEQUENCE
AB Histone lysine crotonylation (Kcr) is a post-translational modification of histone proteins that is involved in the regulation of gene transcription, acute and chronic kidney injury, spermatogenesis, depression, cancer, and so forth. The identification of Kcr sites in proteins is important for characterizing and regulating primary biological mechanisms. The use of computational approaches such as machine learning and deep learning algorithms have emerged in recent years as the traditional wet-lab experiments are time-consuming and costly. We propose as part of this study a deep learning model based on a recurrent neural network (RNN) termed as Sohoko-Kcr for the prediction of Kcr sites. Through the embedded encoding of the peptide sequences, we investigate the efficiency of RNN-based models such as long short-term memory (LSTM), bidirectional LSTM (BiLSTM), and bidirectional gated recurrent unit (BiGRU) networks using cross-validation and independent tests. We also established the comparison between Sohoko-Kcr and other published tools to verify the efficiency of our model based on 3-fold, 5-fold, and 10-fold cross-validations using independent set tests. The results then show that the BiGRU model has consistently displayed outstanding performance and computational efficiency. Based on the proposed model, a webserver called Sohoko-Kcr was deployed for free use and is accessible at https://sohoko-research-9uu23.ondigitalocean.app.
C1 [Tng, Sian Soo; Chua, Matthew Chin Heng] Natl Univ Singapore, Inst Syst Sci, Singapore 119620, Singapore.
   [Yeh, Hui-Yuan] Nanyang Technol Univ, Sch Humanities, Med Humanities Res Cluster, Singapore 639818, Singapore.
   [Le, Nguyen Quoc Khanh] Taipei Med Univ, Coll Med, Profess Master Program Artificial Intelligence Me, Taipei 106, Taiwan.
   [Le, Nguyen Quoc Khanh] Taipei Med Univ, Res Ctr Artificial Intelligence Med, Taipei 106, Taiwan.
   [Le, Nguyen Quoc Khanh] Taipei Med Univ Hosp, Translat Imaging Res Ctr, Taipei 110, Taiwan.
RP Chua, MCH (corresponding author), Natl Univ Singapore, Inst Syst Sci, Singapore 119620, Singapore.; Le, NQK (corresponding author), Taipei Med Univ, Coll Med, Profess Master Program Artificial Intelligence Me, Taipei 106, Taiwan.; Le, NQK (corresponding author), Taipei Med Univ, Res Ctr Artificial Intelligence Med, Taipei 106, Taiwan.; Le, NQK (corresponding author), Taipei Med Univ Hosp, Translat Imaging Res Ctr, Taipei 110, Taiwan.
EM khanhlee@tmu.edu.tw; mattchua@nus.edu.sg
RI , Le Nguyen Quoc Khanh/H-2057-2017
OI , Le Nguyen Quoc Khanh/0000-0003-4896-7926
FU Ministry of Science and Technology, TaiwanMinistry of Science and
   Technology, Taiwan [MOST110-2221-E-038-001-MY2]
FX This work was supported by the Ministry of Science and Technology,
   Taiwan (grant number MOST110-2221-E-038-001-MY2).
CR Bao XC, 2014, ELIFE, V3, DOI 10.7554/eLife.02999
   Berger K, 2014, SEMIN NEPHROL, V34, P394, DOI 10.1016/j.semnephrol.2014.06.006
   Cai LJ, 2021, BRIEF BIOINFORM, V22, DOI 10.1093/bib/bbaa367
   Chen YZ, 2021, BRIEF BIOINFORM, V22, DOI 10.1093/bib/bbab146
   Chen Y, 2007, MOL CELL PROTEOMICS, V6, P812, DOI 10.1074/mcp.M700021-MCP200
   Cho K., 2014, P C EMP METH NAT LAN, P1724
   Cui FF, 2021, BRIEF FUNCT GENOMICS, V20, P61, DOI 10.1093/bfgp/elaa030
   Dai LZ, 2014, NAT CHEM BIOL, V10, P365, DOI [10.1038/NCHEMBIO.1497, 10.1038/nchembio.1497]
   Dutta A, 2016, MOL CELL, V63, P547, DOI 10.1016/j.molcel.2016.06.038
   Fu HF, 2018, STEM CELL REP, V11, P70, DOI 10.1016/j.stemcr.2018.05.003
   Fu HL, 2019, BMC BIOINFORMATICS, V20, DOI 10.1186/s12859-019-2677-9
   Gong CX, 2005, J NEURAL TRANSM, V112, P813, DOI 10.1007/s00702-004-0221-0
   Hochreiter S, 1997, NEURAL COMPUT, V9, P1735, DOI 10.1162/neco.1997.9.8.1735
   HOPFIELD JJ, 1982, P NATL ACAD SCI-BIOL, V79, P2554, DOI 10.1073/pnas.79.8.2554
   Jiang GC, 2018, J CLIN INVEST, V128, P1190, DOI 10.1172/JCI98071
   Jin HJ, 2009, BIOMARK INSIGHTS, V4, P191
   Ju Z, 2017, J MOL GRAPH MODEL, V77, P200, DOI 10.1016/j.jmgm.2017.08.020
   Kouzarides T, 2007, CELL, V128, P693, DOI 10.1016/j.cell.2007.02.005
   Kulmanov M, 2018, BIOINFORMATICS, V34, P660, DOI 10.1093/bioinformatics/btx624
   Li GB, 2021, PEERJ, V9, DOI 10.7717/peerj.11262
   Li K, 2021, EPIGENET CHROMATIN, V14, DOI 10.1186/s13072-021-00385-9
   Lin X, 2020, BRIEF BIOINFORM, V21, P2099, DOI 10.1093/bib/bbz125
   Liu SM, 2017, MOL CELL, V67, P853, DOI 10.1016/j.molcel.2017.07.011
   Liu XG, 2017, CELL DISCOV, V3, DOI 10.1038/celldisc.2017.16
   Liu YN, 2020, ANAL BIOCHEM, V609, DOI 10.1016/j.ab.2020.113903
   Liu YQ, 2019, BIOL PSYCHIAT, V85, P635, DOI 10.1016/j.biopsych.2018.11.025
   Long HX, 2020, CURR BIOINFORM, V15, P300, DOI 10.2174/1574893614666190902154332
   Lv H, 2021, BRIEF BIOINFORM, V22, DOI 10.1093/bib/bbaa255
   Malebary SJ, 2019, PLOS ONE, V14, DOI 10.1371/journal.pone.0223993
   Manayalan B, 2018, J PROTEOME RES, V17, P2715, DOI 10.1021/acs.jproteome.8b00148
   Meyer J. G., 2021, CELL REP METHODS, V1
   Morino K, 2005, J CLIN INVEST, V115, P3587, DOI 10.1172/JCI25151
   Le NQK, 2019, J PROTEOME RES, V18, P3503, DOI 10.1021/acs.jproteome.9b00411
   Qiao YH, 2022, BIOINFORMATICS, V38, P648, DOI 10.1093/bioinformatics/btab712
   Qiu WR, 2018, GENOMICS, V110, P239, DOI 10.1016/j.ygeno.2017.10.008
   Qiu WR, 2017, ARTIF INTELL MED, V83, P75, DOI 10.1016/j.artmed.2017.02.007
   RUMELHART DE, 1986, NATURE, V323, P533, DOI 10.1038/323533a0
   Sabari BR, 2017, NAT REV MOL CELL BIO, V18, P90, DOI 10.1038/nrm.2016.140
   Sabari BR, 2015, MOL CELL, V58, P203, DOI 10.1016/j.molcel.2015.02.029
   Siraj A, 2021, IEEE ACCESS, V9, P6674, DOI 10.1109/ACCESS.2021.3049142
   Sun B, 2021, J PROTEOME RES, V20, P3749, DOI 10.1021/acs.jproteome.1c00346
   Tan MJ, 2011, CELL, V146, P1015, DOI 10.1016/j.cell.2011.08.008
   Verdin E, 2015, NAT REV MOL CELL BIO, V16, P258, DOI 10.1038/nrm3931
   Wan JH, 2019, J CELL MOL MED, V23, P7163, DOI 10.1111/jcmm.14650
   Wan JH, 2019, BIOMED PHARMACOTHER, V111, P976, DOI 10.1016/j.biopha.2018.12.148
   Wei W, 2017, CELL RES, V27, P898, DOI 10.1038/cr.2017.68
   Wei XL, 2021, IEEE ACCESS, V9, P49504, DOI 10.1109/ACCESS.2021.3068413
   Wen B, 2020, PROTEOMICS, V20, DOI 10.1002/pmic.201900335
   Xiu QX, 2019, PROCEEDINGS OF 2019 IEEE 7TH INTERNATIONAL CONFERENCE ON COMPUTER SCIENCE AND NETWORK TECHNOLOGY (ICCSNT 2019), P179, DOI 10.1109/ICCSNT47585.2019.8962485
   Xu WZ, 2017, CELL RES, V27, P946, DOI 10.1038/cr.2017.60
   Yu HJ, 2020, SCI ADV, V6, DOI 10.1126/sciadv.aay4697
   Zhao YM, 2020, IEEE ACCESS, V8, P14244, DOI 10.1109/ACCESS.2020.2966592
NR 52
TC 2
Z9 2
U1 8
U2 8
PU AMER CHEMICAL SOC
PI WASHINGTON
PA 1155 16TH ST, NW, WASHINGTON, DC 20036 USA
SN 1535-3893
EI 1535-3907
J9 J PROTEOME RES
JI J. Proteome Res.
PD JAN 7
PY 2022
VL 21
IS 1
BP 265
EP 273
DI 10.1021/acs.jproteome.1c00848
PG 9
WC Biochemical Research Methods
WE Science Citation Index Expanded (SCI-EXPANDED)
SC Biochemistry & Molecular Biology
GA YI8MT
UT WOS:000744097700025
PM 34812044
DA 2022-04-10
ER

PT J
AU Bennun, SV
   Hizal, DB
   Heffner, K
   Can, O
   Zhang, H
   Betenbaugh, MJ
AF Bennun, Sandra V.
   Hizal, Deniz Baycin
   Heffner, Kelley
   Can, Ozge
   Zhang, Hui
   Betenbaugh, Michael J.
TI Systems Glycobiology: Integrating Glycogenomics, Glycoproteomics,
   Glycomics, and Other 'Omics Data Sets to Characterize Cellular
   Glycosylation Processes
SO JOURNAL OF MOLECULAR BIOLOGY
LA English
DT Review
DE glycoinformatics; systems biology; N-glycosylation; glycans; Chinese
   hamster ovary
ID MASS-SPECTROMETRIC DATA; N-LINKED GLYCOPROTEINS; GLYCAN-RELATED-GENES;
   PROTEIN GLYCOSYLATION; BIOMARKER DISCOVERY; HUMAN-DISEASE;
   MATHEMATICAL-MODEL; CANCER BIOMARKERS; ENZYME DATABASE; prostate cancer
AB The number of proteins encoded in the human genome has been estimated at between 20,000 and 25,000, despite estimates that the entire proteome contains more than a million proteins. One reason for this difference is due to many post-translational modification of protein that contribute to proteome complexity. Among these, glycosylation is of particular relevance because it serves to modify a large number of cellular proteins. Glycogenomics, glycoproteomics, glycomics, and glycoinformatics are helping to accelerate our understanding of the cellular events involved in generating the glycoproteome, the variety of glycan structures possible, and the importance of roles that glycans play in therapeutics and disease. Indeed, interest in glycosylation has expanded rapidly over the past decade, as large amounts of experimental 'omics data relevant to glycosylation processing have accumulated. Furthermore, new and more sophisticated glycoinformatics tools and databases are now available for glycan and glycosylation pathway analysis. Here, we summarize some of the recent advances in both experimental profiling and analytical methods involving N- and O-linked glycosylation processing for biotechnological and medically relevant cells together with the unique opportunities and challenges associated with interrogating and assimilating multiple, disparate high-throughput glycosylation data sets. This emerging era of advanced glycomics will lead to the discovery of key glycan biomarkers linked to diseases and help establish a better understanding of physiology and improved control of glycosylation processing in diverse cells and tissues important to disease and production of recombinant therapeutics. Furthermore, methodologies that facilitate the integration of glycomics measurements together with other 'omics data sets will lead to a deeper understanding and greater insights into the nature of glycosylation as a complex cellular process. (C) 2016 Elsevier Ltd. All rights reserved.
C1 [Bennun, Sandra V.; Hizal, Deniz Baycin; Heffner, Kelley; Betenbaugh, Michael J.] Johns Hopkins Univ, Dept Chem & Biomol Engn, Baltimore, MD 21218 USA.
   [Can, Ozge] Acibadem Univ, Dept Med Engn, Istanbul, Turkey.
   [Zhang, Hui] Johns Hopkins Univ, Sch Med, Baltimore, MD 21287 USA.
RP Betenbaugh, MJ (corresponding author), Johns Hopkins Univ, Dept Chem & Biomol Engn, Baltimore, MD 21218 USA.
EM beten@jhu.edu
RI Can, Ozge/G-9355-2015
FU National Cancer InstituteUnited States Department of Health & Human
   ServicesNational Institutes of Health (NIH) - USANIH National Cancer
   Institute (NCI) [5R41CA127885-02, R01CA112314]; Consortium of Functional
   Glycomics: Bridging Grant [U54-GM062116-10]; NIH/NIGMSUnited States
   Department of Health & Human ServicesNational Institutes of Health (NIH)
   - USANIH National Institute of General Medical Sciences (NIGMS)
   [8P41GM103490]; NATIONAL CANCER INSTITUTEUnited States Department of
   Health & Human ServicesNational Institutes of Health (NIH) - USANIH
   National Cancer Institute (NCI) [R41CA127885, R01CA112314] Funding
   Source: NIH RePORTER; NATIONAL INSTITUTE OF GENERAL MEDICAL
   SCIENCESUnited States Department of Health & Human ServicesNational
   Institutes of Health (NIH) - USANIH National Institute of General
   Medical Sciences (NIGMS) [U54GM062116, P41GM103490] Funding Source: NIH
   RePORTER
FX This work was supported by the National Cancer Institute: Awards
   5R41CA127885-02 and R01CA112314, the Consortium of Functional Glycomics:
   Bridging Grant Number U54-GM062116-10, and NIH/NIGMS funding the
   National Center for Glycomics and Glycoproteomics (8P41GM103490). The
   content is solely the responsibility of the authors and does not
   necessarily represent the official views of the National Cancer
   Institute and the Consortium of Functional Glycomics.
CR Adamczyk B, 2012, BBA-GEN SUBJECTS, V1820, P1347, DOI 10.1016/j.bbagen.2011.12.001
   Agrawal P, 2014, P NATL ACAD SCI USA, V111, P4338, DOI 10.1073/pnas.1321524111
   Ahn JM, 2014, MOL CELL PROTEOMICS, V13, P30, DOI 10.1074/mcp.M113.028621
   Akune Y, 2010, OMICS, V14, P475, DOI 10.1089/omi.2009.0129
   An HJ, 2010, METHODS MOL BIOL, V600, P199, DOI 10.1007/978-1-60761-454-8_14
   Aoki-Kinoshita K.F., 2012, DATA MIN SYST BIOL, V939, P87
   Aoki-Kinoshita Kiyoko Flora, 2013, Methods Mol Biol, V939, P87, DOI 10.1007/978-1-62703-107-3_8
   Apweiler R, 1999, BBA-GEN SUBJECTS, V1473, P4, DOI 10.1016/S0304-4165(99)00165-8
   Arnold JN, 2011, J PROTEOME RES, V10, P1755, DOI 10.1021/pr101034t
   Bairoch A, 2000, NUCLEIC ACIDS RES, V28, P304, DOI 10.1093/nar/28.1.304
   Bennun SV, 2013, PLOS COMPUT BIOL, V9, DOI 10.1371/journal.pcbi.1002813
   Brockhausen I, 1998, ACTA ANAT, V161, P36
   Brockhausen I, 2006, EMBO REP, V7, P599, DOI 10.1038/sj.embor.7400705
   Buskas T, 2009, CHEM COMMUN, P5335, DOI 10.1039/b908664c
   Campbell MP, 2008, BIOINFORMATICS, V24, P1214, DOI 10.1093/bioinformatics/btn090
   Campbell MP, 2014, NUCLEIC ACIDS RES, V42, pD215, DOI 10.1093/nar/gkt1128
   Ceroni A, 2008, J PROTEOME RES, V7, P1650, DOI 10.1021/pr7008252
   Comelli EM, 2006, GLYCOBIOLOGY, V16, P117, DOI 10.1093/glycob/cwj048
   Cooper CA, 2001, PROTEOMICS, V1, P340, DOI 10.1002/1615-9861(200102)1:2<340::AID-PROT340>3.3.CO;2-2
   Cooper CA, 2001, NUCLEIC ACIDS RES, V29, P332, DOI 10.1093/nar/29.1.332
   Coutinho PM, 2003, J MOL BIOL, V328, P307, DOI 10.1016/S0022-2836(03)00307-3
   Damodaran D, 2008, GLYCOCONJUGATE J, V25, P191, DOI 10.1007/s10719-007-9085-5
   DeMarco ML, 2008, GLYCOBIOLOGY, V18, P426, DOI 10.1093/glycob/cwn026
   DOUBET S, 1989, TRENDS BIOCHEM SCI, V14, P475, DOI 10.1016/0968-0004(89)90175-8
   Eshghi ST, 2015, ANAL CHEM, V87, P5181, DOI 10.1021/acs.analchem.5b00024
   Frank M, 2010, CELL MOL LIFE SCI, V67, P2749, DOI 10.1007/s00018-010-0352-4
   Furukawa J, 2015, ANAL CHEM, V87, P7524, DOI 10.1021/acs.analchem.5b02155
   Furukawa JI, 2013, BIOMOLECULES, V3, P198, DOI 10.3390/biom3010198
   Furukawa Kiyoshi, 1992, Current Opinion in Biotechnology, V3, P554, DOI 10.1016/0958-1669(92)90085-W
   Fuster MM, 2005, NAT REV CANCER, V5, P526, DOI 10.1038/nrc1649
   Garces F, 2015, IMMUNITY, V43, P1053, DOI 10.1016/j.immuni.2015.11.007
   Goldberg D, 2005, PROTEOMICS, V5, P865, DOI 10.1002/pmic.200401071
   Goldman R, 2009, CLIN CANCER RES, V15, P1808, DOI 10.1158/1078-0432.CCR-07-5261
   Hakomori S, 2002, P NATL ACAD SCI USA, V99, P10231, DOI 10.1073/pnas.172380699
   Hansen L, 2015, GLYCOBIOLOGY, V25, P211, DOI 10.1093/glycob/cwu104
   Hashimoto K, 2006, GLYCOBIOLOGY, V16, p63R, DOI 10.1093/glycob/cwj010
   Hashimoto K, 2008, BIOINFORMATICS, V24, pI167, DOI 10.1093/bioinformatics/btn293
   Hayes CA, 2011, BIOINFORMATICS, V27, P1343, DOI 10.1093/bioinformatics/btr137
   Herget S, 2008, CARBOHYD RES, V343, P2162, DOI 10.1016/j.carres.2008.03.011
   Hirabayashi J, 2004, GLYCOCONJUGATE J, V21, P35, DOI 10.1023/B:GLYC.0000043745.18988.a1
   Hizukuri Y, 2005, CARBOHYD RES, V340, P2270, DOI 10.1016/j.carres.2005.07.012
   Hua S, 2012, BMB REP, V45, P323, DOI 10.5483/BMBRep.2012.45.6.132
   Huffman JE, 2011, HUM MOL GENET, V20, P5000, DOI 10.1093/hmg/ddr414
   Ito H, 2009, J PROTEOME RES, V8, P1358, DOI 10.1021/pr800735j
   Ito Shigeyasu, 2009, V534, P195, DOI 10.1007/978-1-59745-022-5_14
   Joshi HJ, 2004, PROTEOMICS, V4, P1650, DOI 10.1002/pmic.200300784
   Ju TZ, 2013, PROTEOM CLIN APPL, V7, P618, DOI 10.1002/prca.201300024
   Kaji H, 2003, NAT BIOTECHNOL, V21, P667, DOI 10.1038/nbt829
   Kanehisa M, 2004, NUCLEIC ACIDS RES, V32, pD277, DOI 10.1093/nar/gkh063
   Kang XN, 2012, EXP THER MED, V3, P415, DOI 10.3892/etm.2011.430
   Kashyap MK, 2010, CANCER BIOL THER, V10, P796, DOI 10.4161/cbt.10.8.12914
   Kawano S, 2005, BIOINFORMATICS, V21, P3976, DOI 10.1093/bioinformatics/bti666
   Kawano S, 2004, GLYCOBIOLOGY, V14, P1204
   Kim YJ, 1997, GLYCOCONJUGATE J, V14, P569, DOI 10.1023/A:1018580324971
   Krambeck FJ, 2005, BIOTECHNOL BIOENG, V92, P711, DOI 10.1002/bit.20645
   Krambeck FJ, 2009, GLYCOBIOLOGY, V19, P1163, DOI 10.1093/glycob/cwp081
   Kronewitter SR, 2012, PROTEOMICS, V12, P2523, DOI 10.1002/pmic.201100273
   Kuboyama Tetsuji, 2006, Genome Inform, V17, P25
   Lauc G, 2010, PLOS GENET, V6, DOI 10.1371/journal.pgen.1001256
   Li LM, 2010, BMC BIOINFORMATICS, V11, DOI 10.1186/1471-2105-11-S1-S33
   Li QK, 2012, PROTEOM CLIN APPL, V6, P244, DOI 10.1002/prca.201100042
   Li Y, 2011, ANAL CHEM, V83, P240, DOI 10.1021/ac102319g
   Lutteke T, 2006, GLYCOBIOLOGY, V16, p71R, DOI 10.1093/glycob/cwj049
   Maass K, 2007, PROTEOMICS, V7, P4435, DOI 10.1002/pmic.200700253
   Megger DA, 2013, BBA-PROTEINS PROTEOM, V1834, P1581, DOI 10.1016/j.bbapap.2013.04.001
   Mickum ML, 2014, FRONT GENET, V5, DOI 10.3389/fgene.2014.00262
   Nairn AV, 2008, J BIOL CHEM, V283, P17298, DOI 10.1074/jbc.M801964200
   Nairn AV, 2012, J BIOL CHEM, V287, DOI 10.1074/jbc.M112.405233
   North SJ, 2010, J BIOL CHEM, V285, P5759, DOI 10.1074/jbc.M109.068353
   Packer NH, 2008, PROTEOMICS, V8, P8, DOI 10.1002/pmic.200700917
   Rabbani B, 2014, J HUM GENET, V59, P5, DOI 10.1038/jhg.2013.114
   Rakus JF, 2011, ANNU REV ANAL CHEM, V4, P367, DOI 10.1146/annurev-anchem-061010-113951
   Raman R, 2005, NAT METHODS, V2, P817, DOI 10.1038/NMETH807
   Raman R, 2006, GLYCOBIOLOGY, V16, p82R, DOI 10.1093/glycob/cwj080
   Ranzinger R., 2011, GLYCO BIOINFORMATICS
   Ranzinger R, 2011, NUCLEIC ACIDS RES, V39, pD373, DOI 10.1093/nar/gkq1014
   Ranzinger R, 2008, BMC BIOINFORMATICS, V9, DOI 10.1186/1471-2105-9-384
   Raso C, 2012, J PROTEOME RES, V11, P3199, DOI 10.1021/pr2012347
   Saldova R, 2011, EPIGENETICS-US, V6, P1362, DOI 10.4161/epi.6.11.17977
   Schomburg I, 2004, NUCLEIC ACIDS RES, V32, pD431, DOI 10.1093/nar/gkh081
   Suga A, 2007, GENOME INFORM SER, V18, P237
   Sun SS, 2016, NAT BIOTECHNOL, V34, P84, DOI 10.1038/nbt.3403
   Tan ZQ, 2014, J PROTEOME RES, V13, P2783, DOI 10.1021/pr401185z
   Taniguchi N, 2007, PROTEOMICS, V7, P1360, DOI 10.1002/pmic.200700123
   Tian Y., 2012, MOL CELL PROTEOMICS, V11
   Tian Y, 2011, PROTEOMICS, V11, P4677, DOI 10.1002/pmic.201000811
   Tian Y, 2011, ANAL CHEM, V83, P7013, DOI 10.1021/ac200815q
   Tian Y, 2010, PROTEOM CLIN APPL, V4, P124, DOI 10.1002/prca.200900161
   TOMIYA N, 1988, ANAL BIOCHEM, V171, P73, DOI 10.1016/0003-2697(88)90126-1
   Tong L, 2003, BIOTECHNOL GENET ENG, V20, P199, DOI 10.1080/02648725.2003.10648044
   Tousi F., 2011, ANAL METHODS, V3, P195
   VANKUIK JA, 1992, CARBOHYD RES, V235, P53, DOI 10.1016/0008-6215(92)80078-F
   von der Lieth CW, 2011, GLYCOBIOLOGY, V21, P493, DOI 10.1093/glycob/cwq188
   von der Lieth CW, 2004, BRIEF BIOINFORM, V5, P164, DOI 10.1093/bib/5.2.164
   Xu X, 2011, NAT BIOTECHNOL, V29, P735, DOI 10.1038/nbt.1932
   Yamanishi Y, 2007, BIOINFORMATICS, V23, P1211, DOI 10.1093/bioinformatics/btm090
   Yang S, 2016, PROTEOMICS, V16, P241, DOI 10.1002/pmic.201500266
   Yang S, 2015, SCI REP-UK, V5, DOI 10.1038/srep17585
   Yang S, 2015, PROTEOMICS, V15, P567, DOI 10.1002/pmic.201400151
   Yang Shuang, 2014, Curr Protoc Chem Biol, V6, P191, DOI 10.1002/9780470559277.ch140085
   Yang WM, 2014, THERANOSTICS, V4, P1153, DOI 10.7150/thno.9510
   Yang Z, 2015, NAT BIOTECHNOL, V33, P842, DOI 10.1038/nbt.3280
   Yoshida Keiichi, 2004, Tanpakushitsu Kakusan Koso, V49, P2313
   Zabczynska Marta, 2015, Postepy Biochem, V61, P129
   Zhang H, 2003, NAT BIOTECHNOL, V21, P660, DOI 10.1038/nbt827
   Zhang Y, 2014, CLIN PROTEOM, V11, DOI 10.1186/1559-0275-11-18
   Zhang Y, 2012, GLYCOCONJUGATE J, V29, P249, DOI 10.1007/s10719-012-9398-x
   Zoldos V, 2013, CURR OPIN CHEM BIOL, V17, P34, DOI 10.1016/j.cbpa.2012.12.007
   Zoldos V, 2012, EPIGENETICS-US, V7, P164, DOI 10.4161/epi.7.2.18918
NR 109
TC 33
Z9 35
U1 1
U2 62
PU ACADEMIC PRESS LTD- ELSEVIER SCIENCE LTD
PI LONDON
PA 24-28 OVAL RD, LONDON NW1 7DX, ENGLAND
SN 0022-2836
EI 1089-8638
J9 J MOL BIOL
JI J. Mol. Biol.
PD AUG 14
PY 2016
VL 428
IS 16
SI SI
BP 3337
EP 3352
DI 10.1016/j.jmb.2016.07.005
PG 16
WC Biochemistry & Molecular Biology
WE Science Citation Index Expanded (SCI-EXPANDED)
SC Biochemistry & Molecular Biology
GA DU7QE
UT WOS:000382408900015
PM 27423401
DA 2022-04-10
ER

PT J
AU Sharma, P
   Murillas, R
   Zhang, HF
   Kuehn, MR
AF Sharma, Prashant
   Murillas, Rodolfo
   Zhang, Huafeng
   Kuehn, Michael R.
TI N4BP1 is a newly identified nucleolar protein that undergoes
   SUMO-regulated polyubiquitination and proteasomal turnover at
   promyelocytic leukemia nuclear bodies
SO JOURNAL OF CELL SCIENCE
LA English
DT Article
DE N4BP1; PML nuclear bodies; SUMO; Nucleolus; Ubiquitin
ID BODY FORMATION; INTRACELLULAR-LOCALIZATION; SUBNUCLEAR LOCALIZATION;
   CELL-NUCLEUS; PML PROTEIN; UBIQUITIN; DEGRADATION; INHIBITION; TUMOR;
   DAXX
AB A number of proteins can be conjugated with both ubiquitinationand the small ubiquitin-related modifier (SUMO), with crosstalk between these two post-translational modification serving to regulate protein function and stability. We previously identified N4BP1 as a substrate for monoubiquitination by the E3 ubiquitinationligase Nedd4. Here, we describe Nedd4-mediated polyubiquitination and proteasomal degradation of N4BP1. In addition, we show that N4BP1 can be conjugated with SUMO1 and that this abrogates N4BP1 ubiquitination. Consistent with this, endogenous N4BP1 is stabilized in primary embryonic fibroblasts from mutants of the desumoylating enzyme SENP1, which show increased steady-state sumoylation levels. We have localized endogenous N4BP1 predominantly to the nucleolus in primary cells. However, a small fraction is found at promyelocytic leukemia (PML) nuclear bodies (NBs). In cells deficient for SENP1 or in wild-type cells treated with the proteasome inhibitor MG132, there is considerable accumulation of N4BP1 at PML NBs. These findings suggest a dynamic interaction between subnuclear compartments, and a role for post-translational modification by ubiquitinationand sumoylationin the regulation of nucleolar protein turnover.
C1 [Sharma, Prashant; Zhang, Huafeng; Kuehn, Michael R.] NCI, Lab Prot Dynam & Signaling, Ctr Canc Res, NCI Frederick, Frederick, MD 21702 USA.
   [Murillas, Rodolfo] CIBERER U714, Ctr Invest Energet Medioambientales & Tecnol, Epithelial Biomed Div, Madrid, Spain.
RP Kuehn, MR (corresponding author), NCI, Lab Prot Dynam & Signaling, Ctr Canc Res, NCI Frederick, Frederick, MD 21702 USA.
EM mkuehn@mail.nih.gov
RI Zhang, Huafeng/A-7188-2012; Sharma, Prashant/ABH-2407-2021; Sharma,
   Prashant/ABH-1968-2021; MURILLAS, RODOLFO/H-8121-2017; Kuehn, Michael
   R/A-4573-2014
OI MURILLAS, RODOLFO/0000-0001-9813-1006; Kuehn, Michael
   R/0000-0002-7703-9160
FU National Institutes of Health, National Cancer Institute, Center for
   Cancer ResearchUnited States Department of Health & Human
   ServicesNational Institutes of Health (NIH) - USANIH National Cancer
   Institute (NCI); NATIONAL CANCER INSTITUTEUnited States Department of
   Health & Human ServicesNational Institutes of Health (NIH) - USANIH
   National Cancer Institute (NCI) [ZIABC009297] Funding Source: NIH
   RePORTER
FX We thank Margaret Lualdi for expert technical assistance, Mary Dasso and
   Deborah Morrison for antibodies and reagents, Stephen Lockett for
   assistance with imaging, and Oyvind Dahle, Alessandra Mazzoni and Allan
   Weissman for critically reading the manuscript. This research was
   supported by the Intramural Research Program of the National Institutes
   of Health, National Cancer Institute, Center for Cancer Research. The
   content of this publication does not necessarily reflect the views or
   policies of the Department of Health and Human Services and nor does
   mention of trade names, commercial products or organizations imply
   endorsement by the US Government. Deposited in PMC for release after 12
   months.
CR Anantharaman Vivek, 2006, RNA Biol, V3, P18
   Anton LC, 1999, J CELL BIOL, V146, P113, DOI 10.1083/jcb.146.1.113
   Bailey D, 2005, BIOCHEM J, V392, P271, DOI 10.1042/BJ20050873
   Bailey D, 2004, J BIOL CHEM, V279, P692, DOI 10.1074/jbc.M306195200
   Bernardi R, 2008, ONCOGENE, V27, P6299, DOI 10.1038/onc.2008.305
   Bernardi R, 2007, NAT REV MOL CELL BIO, V8, P1006, DOI 10.1038/nrm2277
   Boisvert FM, 2007, NAT REV MOL CELL BIO, V8, P574, DOI 10.1038/nrm2184
   Borden KLB, 2008, BBA-MOL CELL RES, V1783, P2145, DOI 10.1016/j.bbamcr.2008.06.005
   Borden KLB, 2002, MOL CELL BIOL, V22, P5259, DOI 10.1128/MCB.22.15.5259-5269.2002
   Chen M, 2002, MOL BIOL CELL, V13, P3576, DOI 10.1091/mbc.02-05-0083
   Condemine W, 2007, J CELL SCI, V120, P3219, DOI 10.1242/jcs.007492
   Desterro JMP, 1998, MOL CELL, V2, P233, DOI 10.1016/S1097-2765(00)80133-1
   Dundr M, 2001, BIOCHEM J, V356, P297, DOI 10.1042/0264-6021:3560297
   Evdokimov E, 2008, J CELL SCI, V121, P4106, DOI 10.1242/jcs.038570
   Fabunmi RP, 2001, J CELL SCI, V114, P29
   Hamilton MH, 2001, J BIOL CHEM, V276, P26324, DOI 10.1074/jbc.M101205200
   Handwerger KE, 2006, TRENDS CELL BIOL, V16, P19, DOI 10.1016/j.tcb.2005.11.005
   Hershko A, 1998, ANNU REV BIOCHEM, V67, P425, DOI 10.1146/annurev.biochem.67.1.425
   Holzmann J, 2008, CELL, V135, P462, DOI 10.1016/j.cell.2008.09.013
   Ishov AM, 1999, J CELL BIOL, V147, P221, DOI 10.1083/jcb.147.2.221
   Janderovd-Rossmeislova L, 2007, J STRUCT BIOL, V159, P56, DOI 10.1016/j.jsb.2007.02.008
   Lafarga M, 2002, MOL BIOL CELL, V13, P2771, DOI 10.1091/mbc.E02-03-0122
   Lallemand-Breitenbach V, 2001, J EXP MED, V193, P1361, DOI 10.1084/jem.193.12.1361
   Lin DY, 2006, MOL CELL, V24, P341, DOI 10.1016/j.molcel.2006.10.019
   Magnifico A, 2003, J BIOL CHEM, V278, P43169, DOI 10.1074/jbc.M308009200
   Matafora V, 2009, MOL CELL PROTEOMICS, V8, P2243, DOI 10.1074/mcp.M900079-MCP200
   Matsushita K, 2009, NATURE, V458, P1185, DOI 10.1038/nature07924
   Mattsson K, 2001, P NATL ACAD SCI USA, V98, P1012, DOI 10.1073/pnas.031566998
   Murillas R, 2002, J BIOL CHEM, V277, P2897, DOI 10.1074/jbc.M110047200
   Nefkens I, 2003, J CELL SCI, V116, P513, DOI 10.1242/jcs.00253
   Oberst A, 2007, P NATL ACAD SCI USA, V104, P11280, DOI 10.1073/pnas.0701773104
   Ogiso Y, 2000, CANCER RES, V60, P2429
   Olson MOJ, 2000, TRENDS CELL BIOL, V10, P189, DOI 10.1016/S0962-8924(00)01738-4
   Parrinello S, 2003, NAT CELL BIOL, V5, P741, DOI 10.1038/ncb1024
   Pederson T, 1998, NUCLEIC ACIDS RES, V26, P3871, DOI 10.1093/nar/26.17.3871
   Pederson T, 2009, J CELL BIOL, V184, P771, DOI 10.1083/jcb.200812014
   Raska I, 2006, CURR OPIN CELL BIOL, V18, P325, DOI 10.1016/j.ceb.2006.04.008
   Rego EM, 2001, J EXP MED, V193, P521, DOI 10.1084/jem.193.4.521
   Rockel TD, 2005, J CELL SCI, V118, P5231, DOI 10.1242/jcs.02642
   Rockel TD, 2002, J STRUCT BIOL, V140, P189
   Rodriguez MS, 2001, J BIOL CHEM, V276, P12654, DOI 10.1074/jbc.M009476200
   Rokaeus N, 2007, ONCOGENE, V26, P982, DOI 10.1038/sj.onc.1209858
   Sampson DA, 2001, J BIOL CHEM, V276, P21664, DOI 10.1074/jbc.M100006200
   Shen TH, 2006, MOL CELL, V24, P331, DOI 10.1016/j.molcel.2006.09.013
   Sirri V, 2008, HISTOCHEM CELL BIOL, V129, P13, DOI 10.1007/s00418-007-0359-6
   Spector David L, 2006, Cell, V127, P1071, DOI 10.1016/j.cell.2006.11.026
   Spector DL, 2001, J CELL SCI, V114, P2891
   Strudwick S, 2002, LEUKEMIA, V16, P1906, DOI 10.1038/sj.leu.2402724
   Torok D, 2009, FRONT BIOSCI-LANDMRK, V14, P1325, DOI 10.2741/3311
   Ulrich HD, 2005, TRENDS CELL BIOL, V15, P525, DOI 10.1016/j.tcb.2005.08.002
   Weidtkamp-Peters S, 2008, J CELL SCI, V121, P2731, DOI 10.1242/jcs.031922
   Wojcik C, 2003, INT J BIOCHEM CELL B, V35, P579, DOI 10.1016/S1357-2725(02)00380-1
   Yamaguchi T, 2005, MOL CELL BIOL, V25, P5171, DOI 10.1128/MCB.25.12.5171-5182.2005
   Zaidi SK, 2007, NAT REV CANCER, V7, P454, DOI 10.1038/nrc2149
   Zhong S, 2000, BLOOD, V95, P2748, DOI 10.1182/blood.V95.9.2748.009k31a_2748_2752
   Zimber A, 2004, CELL SIGNAL, V16, P1085, DOI 10.1016/j.cellsig.2004.03.020
NR 56
TC 24
Z9 26
U1 1
U2 5
PU COMPANY OF BIOLOGISTS LTD
PI CAMBRIDGE
PA BIDDER BUILDING CAMBRIDGE COMMERCIAL PARK COWLEY RD, CAMBRIDGE CB4 4DL,
   CAMBS, ENGLAND
SN 0021-9533
J9 J CELL SCI
JI J. Cell Sci.
PD APR 15
PY 2010
VL 123
IS 8
BP 1227
EP 1234
DI 10.1242/jcs.060160
PG 8
WC Cell Biology
WE Science Citation Index Expanded (SCI-EXPANDED)
SC Cell Biology
GA 582AU
UT WOS:000276568200006
PM 20233849
OA Green Published, Bronze
DA 2022-04-10
ER

PT J
AU Kracun, SK
   Clo, E
   Clausen, H
   Levery, SB
   Jensen, KJ
   Blixt, O
AF Kracun, Stjepan K.
   Clo, Emiliano
   Clausen, Henrik
   Levery, Steven B.
   Jensen, Knud J.
   Blixt, Ola
TI Random Glycopeptide Bead Libraries for Seromic Biomarker Discovery
SO JOURNAL OF PROTEOME RESEARCH
LA English
DT Article
DE glycopeptide; post translational modification (PTM);
   one-bead-one-compound (OBOC); split-mix; microarray; O-glycosylation;
   autoantibodies; enzymatic; electron transfer dissociation (ETD)
ID ELECTRON-TRANSFER DISSOCIATION; CANCER-IMMUNOTHERAPY; MASS-SPECTROMETER;
   C-TRAP; PEPTIDE; MUC1; PROTEIN; ANTIBODIES; EPITOPES; GLYCOSYLATION
AB Identification of disease-specific biomarkers is important to address early diagnosis and management of disease Aberrant post translational modifications (PTM) of proteins such as O-glycosylations (0 PTMs) are emerging as triggers of autoantibodies that can serve as sensitive biomarkers Here we have developed a random glycopeptide bead library screening platform for detection of autoantibodies and other binding proteins Libraries were build on biocompatible PEGA beads including a safety-catch C terminal amide linker (SCAL) that allowed mild cleavage conditions (I-2/NaBH4 and TFA) for release of glycopeptides and sequence determination by ESI Orbitrap-MSn As proof of-principle tumor specific glycopeptide reporter epitopes were built-in into the libraries and were detected by tumor specific monoclonal antibodies and autoantibodies from cancer patients Sequenced and identified glycopeptides were resynthesized at the preparative scale by automated parallel peptide synthesis and printed on microarrays for validation and broader analysis with larger sets of sera We further showed that chemical synthesis of the monosaccharide O glycopeptide library (Tn glycoform) could be diversified to other tumor glycoforms by on bead enzymatic glycosylation reactions with recombinant glycosyltransferases Hence, we have developed a high throughput flexible platform for rapid discovery of O glycopeptide biomarkers and the method has applicability in other types of assays such as lectin/antibody/enzyme specificity studies as well as investigation of other PTMs
C1 [Kracun, Stjepan K.; Clo, Emiliano; Clausen, Henrik; Levery, Steven B.; Blixt, Ola] Univ Copenhagen, Dept Cellular & Mol Med, Copenhagen Ctr Glyc, DK-2200 Copenhagen N, Denmark.
   [Jensen, Knud J.] Univ Copenhagen, Dept Basic Sci & Environm Bioorgan Chem, DK-1871 Frederiksberg, Denmark.
RP Blixt, O (corresponding author), Univ Copenhagen, Dept Cellular & Mol Med, Copenhagen Ctr Glyc, Blegdamsvej 3B, DK-2200 Copenhagen N, Denmark.
RI Jensen, Knud J/D-1145-2016; Kracun, Stjepan Kresimir/F-7651-2014;
   clausen, henrik/AAD-8016-2021
OI Jensen, Knud J/0000-0003-3525-5452; Kracun, Stjepan
   Kresimir/0000-0002-5795-1320; Clausen, Henrik/0000-0002-0915-5055;
   Blixt, Ola/0000-0003-4143-6276
FU Benzon Foundation; Carlsberg FoundationCarlsberg Foundation; Danish
   Research CouncilsDet Frie Forskningsrad (DFF); Danish Agency for Science
   Technology and Innovation (FTP); NIHUnited States Department of Health &
   Human ServicesNational Institutes of Health (NIH) - USA [P01 CA 052477,
   1U01CA128437 01]; EUEuropean Commission [201381]; University of
   Copenhagen; NATIONAL CANCER INSTITUTEUnited States Department of Health
   & Human ServicesNational Institutes of Health (NIH) - USANIH National
   Cancer Institute (NCI) [P01CA052477, U01CA128437] Funding Source: NIH
   RePORTER
FX This work was supported by The Benzon Foundation The Carlsberg
   Foundation The Danish Research Councils, Danish Agency for Science
   Technology and Innovation (FTP), NIH P01 CA 052477 NIH (1U01CA128437 01)
   EU FP7 HEALTH 2007 A 201381 EU Marie Curie programme EuroGlycoArrays ITN
   and University of Copenhagen Programme of Excellence
CR Auzanneau F I, 1995, J Pept Sci, V1, P31, DOI 10.1002/psc.310010106
   Blixt O, 2004, P NATL ACAD SCI USA, V101, P17033, DOI 10.1073/pnas.0407902101
   Blixt O, 1998, J ORG CHEM, V63, P2705, DOI 10.1021/jo980074h
   Blixt O, 2006, METHOD ENZYMOL, V415, P137, DOI 10.1016/S0076-6879(06)15009-0
   Blixt O, 2010, J PROTEOME RES, V9, P5250, DOI 10.1021/pr1005229
   Brockhausen I, 1999, BBA-GEN SUBJECTS, V1473, P67, DOI 10.1016/S0304-4165(99)00170-1
   Brust A, 2007, J PEPT SCI, V13, P133, DOI 10.1002/psc.825
   BURCHELL J, 1993, EPITHELIAL CELL BIOL, V2, P155
   Chan W. C., 2000, FMOC SOLID PHASE SYN
   Chapman C, 2007, ANN ONCOL, V18, P868, DOI 10.1093/annonc/mdm007
   Iwai T, 2002, J BIOL CHEM, V277, P12802, DOI 10.1074/jbc.M112457200
   Karimi B, 2003, SYNTHESIS-STUTTGART, P335
   Karsten U, 2005, TUMOR BIOL, V26, P217, DOI 10.1159/000086956
   Krueger KE, 2006, MOL CELL PROTEOMICS, V5, P1799, DOI 10.1074/mcp.R600009-MCP200
   Lam KS, 1997, CHEM REV, V97, P411, DOI 10.1021/cr9600114
   Lam KS, 2003, METHOD ENZYMOL, V369, P298
   LAM KS, 1991, NATURE, V354, P82, DOI 10.1038/354082a0
   Laurent N, 2008, CHEMBIOCHEM, V9, P883, DOI 10.1002/cbic.200700692
   Makarov A, 2006, ANAL CHEM, V78, P2113, DOI 10.1021/ac0518811
   Meldal Morten, 1994, Methods (Orlando), V6, P417, DOI 10.1006/meth.1994.1044
   Mintz PJ, 2003, NAT BIOTECHNOL, V21, P57, DOI 10.1038/nbt774
   Nestler Hans Peter, 2005, Curr Drug Discov Technol, V2, P1, DOI 10.2174/1570163053175484
   Ninkovic T, 2007, J IMMUNOL, V179, P2380, DOI 10.4049/jimmunol.179.4.2380
   Olsen JV, 2007, NAT METHODS, V4, P709, DOI 10.1038/NMETH1060
   Olsen JV, 2005, MOL CELL PROTEOMICS, V4, P2010, DOI 10.1074/mcp.T500030-MCP200
   Paulson JC, 2006, NAT CHEM BIOL, V2, P238, DOI 10.1038/nchembio785
   Price MR, 1998, TUMOR BIOL, V19, P1, DOI 10.1159/000056500
   Reuschenbach M, 2009, CANCER IMMUNOL IMMUN, V58, P1535, DOI 10.1007/s00262-009-0733-4
   Rudd PM, 2001, SCIENCE, V291, P2370, DOI 10.1126/science.291.5512.2370
   Sabbatini PJ, 2007, CLIN CANCER RES, V13, P4170, DOI 10.1158/1078-0432.CCR-06-2949
   Schietinger A, 2006, SCIENCE, V314, P304, DOI 10.1126/science.1129200
   Schietinger A, 2008, SEMIN IMMUNOL, V20, P276, DOI 10.1016/j.smim.2008.07.001
   Sorensen AL, 2006, GLYCOBIOLOGY, V16, P96, DOI 10.1093/glycob/cwj044
   Springer GF, 1997, J MOL MED, V75, P594, DOI 10.1007/s001090050144
   Swaney DL, 2007, ANAL CHEM, V79, P477, DOI 10.1021/ac061457f
   Syka JEP, 2004, P NATL ACAD SCI USA, V101, P9528, DOI 10.1073/pnas.0402700101
   Tarp MA, 2007, GLYCOBIOLOGY, V17, P197, DOI 10.1093/glycob/cwl061
   Tolborg JF, 2002, J ORG CHEM, V67, P4143, DOI 10.1021/jo0163445
   von Gunten S, 2009, J ALLERGY CLIN IMMUN, V123
   Wandall HH, 2010, CANCER RES, V70, P1306, DOI 10.1158/0008-5472.CAN-09-2893
   Zhang Y, 2009, J AM SOC MASS SPECTR, V20, P1425, DOI 10.1016/j.jasms.2009.03.019
NR 41
TC 28
Z9 28
U1 1
U2 24
PU AMER CHEMICAL SOC
PI WASHINGTON
PA 1155 16TH ST, NW, WASHINGTON, DC 20036 USA
SN 1535-3893
J9 J PROTEOME RES
JI J. Proteome Res.
PD DEC
PY 2010
VL 9
IS 12
BP 6705
EP 6714
DI 10.1021/pr1008477
PG 10
WC Biochemical Research Methods
WE Science Citation Index Expanded (SCI-EXPANDED)
SC Biochemistry & Molecular Biology
GA 688NI
UT WOS:000284856200053
PM 20886906
OA Green Accepted
DA 2022-04-10
ER

PT J
AU Fardini, Y
   Dehennaut, V
   Lefebvre, T
   Issad, T
AF Fardini, Yann
   Dehennaut, Vanessa
   Lefebvre, Tony
   Issad, Tarik
TI O-GlcNAcylation: a new cancer hallmark?
SO FRONTIERS IN ENDOCRINOLOGY
LA English
DT Review
DE O-glycosylation; O-GlcNAc; post-translational modification; cancer;
   metastasis; cell cycle; epigenetics; transcription factor
AB O-linked N-acetylglucosaminylation (O-GlcNAcylation) is a reversible post-translational modification consisting in the addition of a sugar moiety to serine/threonine residues of cytosolic or nuclear proteins. Catalyzed by O-GlcNAc-transferase (OGT) and removed by O-GlcNAcase, this dynamic modification is dependent on environmental glucose concentration. O-GlcNAcylation regulates the activities of a wide panel of proteins involved in almost all aspects of cell biology. As a nutrient sensor, O-GlcNAcylation can relay the effects of excessive nutritional intake, an important cancer risk factor, on protein activities and cellular functions. Indeed, O-GlcNAcylation has been shown to play a significant role in cancer development through different mechanisms. O-GlcNAcylation and OGT levels are increased in different cancers (breast, prostate, colon...) and vary during cell cycle progression. Modulating their expression or activity can alter cancer cell proliferation and/or invasion. Interestingly, major oncogenic factors have been shown to be directly O-GlcNAcylated (p53, MYC, NF kappa B, beta-catenin...). Furthermore, chromatin dynamics is modulated by O-GlcNAc. DNA methylation enzymes of the Tet family, involved epigenetic alterations associated with cancer, were recently found to interact with and target OGT to multi-molecular chromatin-remodeling complexes. Consistently, histones are subjected to O-GlcNAc modifications which regulate their function. Increasing number of evidences point out the central involvement of O-GlcNAcylation in tumorigenesis, justifying the attention received as a potential new approach for cancer treatment. However, comprehension of the underlying mechanism remains at its beginnings. Future challenge will be to address directly the role of O-GlcNAc-modified residues in oncogenic-related proteins to eventually propose novel strategies to alter cancer development and/or progression.
C1 [Fardini, Yann; Issad, Tarik] Univ Paris 05, Inst Cochin, CNRS, UMR8104, Paris, France.
   [Fardini, Yann; Issad, Tarik] INSERM, U1016, Paris, France.
   [Dehennaut, Vanessa; Lefebvre, Tony] Lille 1 Univ, Inst Federatif Rech IFR 147, CNRS UMR 8576, Unit Struct & Funct Glycobiol, Villeneuve Dascq, France.
RP Issad, T (corresponding author), Inst Cochin, Dept Endocrinol Metab & Diabet, 22 Rue Mechain, F-75014 Paris, France.
EM tarik.issad@inserm.fr
RI Lefebvre, Tony/AAW-9169-2021; Lefebvre, Tony/AAZ-1724-2021; dehennaut,
   vanessa/I-7435-2018
OI Lefebvre, Tony/0000-0001-9883-2240; dehennaut,
   vanessa/0000-0001-6421-0793; Issad, Tarik/0000-0002-2638-6330; FARDINI,
   Yann/0000-0002-6800-1777
FU Association pour la Recherche sur le CancerFondation ARC pour la
   Recherche sur le CancerAustralian Research CouncilEuropean Commission
   [1069, 75958]; Ligue contre le CancerLigue nationale contre le cancer
   [RS10/75-46]; ANR (ANR grant GenopathDiab-O-Glyc)French National
   Research Agency (ANR)
FX Our work was supported by the"Association pour la Recherche sur le
   Cancer" (Grant no. 1069 and Grant no. 75958), the "Ligue contre le
   Cancer" (Comite de Paris, Grant no. RS10/75-46, and Comite Scientifique
   du Septentrion), and by the ANR (ANR grant GenopathDiab-O-Glyc).
CR Anagnostou SH, 2008, BIOCHEM J, V416, P211, DOI 10.1042/BJ20081426
   Ashrafian H, 2011, CANCER-AM CANCER SOC, V117, P1788, DOI 10.1002/cncr.25738
   Bachmaier R, 2009, ONCOGENE, V28, P1280, DOI 10.1038/onc.2008.484
   Baylin SB, 2011, NAT REV CANCER, V11, P726, DOI 10.1038/nrc3130
   Bech-Otschir D, 2001, EMBO J, V20, P1630, DOI 10.1093/emboj/20.7.1630
   Berger SL, 2007, NATURE, V447, P407, DOI 10.1038/nature05915
   Caldwell SA, 2010, ONCOGENE, V29, P2831, DOI 10.1038/onc.2010.41
   Calle EE, 2004, NAT REV CANCER, V4, P579, DOI 10.1038/nrc1408
   Champattanachai V, 2013, PROTEOMICS, V13, P2088, DOI 10.1002/pmic.201200126
   Chen Q, 2013, NATURE, V493, P561, DOI 10.1038/nature11742
   Chen YX, 2006, CHEM BIOL, V13, P937, DOI 10.1016/j.chembiol.2006.06.017
   Cheung WD, 2008, J BIOL CHEM, V283, P13009, DOI 10.1074/jbc.M801222200
   CHOU TY, 1995, P NATL ACAD SCI USA, V92, P4417, DOI 10.1073/pnas.92.10.4417
   Chou TY, 2001, ADV EXP MED BIOL, V491, P413
   CHOU TY, 1995, J BIOL CHEM, V270, P18961, DOI 10.1074/jbc.270.32.18961
   Cirillo D, 2008, J CELL BIOCHEM, V105, P956, DOI 10.1002/jcb.21911
   Colman RJ, 2009, SCIENCE, V325, P201, DOI 10.1126/science.1173635
   Cooks T, 2013, CANCER CELL, V23, P634, DOI 10.1016/j.ccr.2013.03.022
   Copeland RJ, 2013, PROTEOM CLIN APPL, V7, P597, DOI 10.1002/prca.201300001
   Crosio C, 2002, MOL CELL BIOL, V22, P874, DOI 10.1128/MCB.22.3.874-885.2002
   Dahl E, 2005, J PATHOL, V205, P21, DOI 10.1002/path.1687
   Dai C, 2010, TRENDS MOL MED, V16, P528, DOI 10.1016/j.molmed.2010.09.002
   Dajee M, 2003, NATURE, V421, P639, DOI 10.1038/nature01283
   DeBerardinis RJ, 2008, CURR OPIN GENET DEV, V18, P54, DOI 10.1016/j.gde.2008.02.003
   Dehennaut V, 2008, MOL CELL PROTEOMICS, V7, P2229, DOI 10.1074/mcp.M700494-MCP200
   Dehennaut V, 2008, BIOCHEM BIOPH RES CO, V369, P539, DOI 10.1016/j.bbrc.2008.02.063
   Dehennaut V, 2007, J BIOL CHEM, V282, P12527, DOI 10.1074/jbc.M700444200
   Dehennaut V, 2009, GLYCOCONJUGATE J, V26, P301, DOI 10.1007/s10719-008-9166-0
   Deplus R, 2013, EMBO J, V32, P645, DOI 10.1038/emboj.2012.357
   Dogan S, 2007, BREAST CANCER RES, V9, DOI 10.1186/bcr1840
   Dorfmueller HC, 2011, AMINO ACIDS, V40, P781, DOI 10.1007/s00726-010-0688-y
   Dossus L, 2008, BEST PRACT RES CL EN, V22, P551, DOI 10.1016/j.beem.2008.08.003
   Drougat L, 2012, BBA-GEN SUBJECTS, V1820, P1839, DOI 10.1016/j.bbagen.2012.08.024
   Engelman JA, 2009, NAT REV CANCER, V9, P550, DOI 10.1038/nrc2664
   Fang B, 2001, EXP CELL RES, V263, P243, DOI 10.1006/excr.2000.5110
   Fong JJ, 2012, J BIOL CHEM, V287, P12195, DOI 10.1074/jbc.M111.315804
   Fujiki R, 2011, NATURE, V480, P557, DOI 10.1038/nature10656
   Fujiki R, 2009, NATURE, V459, P455, DOI 10.1038/nature07954
   Garofalo C, 2006, CLIN CANCER RES, V12, P1447, DOI 10.1158/1078-0432.CCR-05-1913
   Gialeli C, 2011, FEBS J, V278, P16, DOI 10.1111/j.1742-4658.2010.07919.x
   Gillette CA, 1997, CARCINOGENESIS, V18, P1183, DOI 10.1093/carcin/18.6.1183
   Goto H, 2002, GENES CELLS, V7, P11, DOI 10.1046/j.1356-9597.2001.00498.x
   Gregory MA, 2003, J BIOL CHEM, V278, P51606, DOI 10.1074/jbc.M310722200
   Greten FR, 2004, CELL, V118, P285, DOI 10.1016/j.cell.2004.07.013
   Gu YC, 2010, CANCER RES, V70, P6344, DOI 10.1158/0008-5472.CAN-09-1887
   Guo K, 2012, ONCOL REP, V28, P494, DOI 10.3892/or.2012.1844
   Haltiwanger RS, 1997, J BIOL CHEM, V272, P8752, DOI 10.1074/jbc.272.13.8752
   Hanover JA, 2001, FASEB J, V15, P1865, DOI 10.1096/fj.01-0094rev
   Hanover JA, 2012, NAT REV MOL CELL BIO, V13, P312, DOI 10.1038/nrm3334
   Hart GW, 2007, NATURE, V446, P1017, DOI 10.1038/nature05815
   Hart GW, 2011, ANNU REV BIOCHEM, V80, P825, DOI 10.1146/annurev-biochem-060608-102511
   Hursting SD, 2003, ANNU REV MED, V54, P131, DOI 10.1146/annurev.med.54.101601.152156
   Hurvitz SA, 2008, CANCER-AM CANCER SOC, V113, P2385, DOI 10.1002/cncr.23875
   Issad T, 2010, DIABETES METAB, V36, P423, DOI 10.1016/j.diabet.2010.09.001
   Issad T, 2008, TRENDS ENDOCRIN MET, V19, P380, DOI 10.1016/j.tem.2008.09.001
   Itkonen HM, 2013, CANCER RES, V73, P5277, DOI 10.1158/0008-5472.CAN-13-0549
   Ito S, 2011, SCIENCE, V333, P1300, DOI 10.1126/science.1210597
   Jiang MS, 1997, J BIOL CHEM, V272, P2421
   Jin FZ, 2013, EXP CELL RES, V319, P1482, DOI 10.1016/j.yexcr.2013.03.013
   Kalaany NY, 2009, NATURE, V458, P725, DOI 10.1038/nature07782
   Kalo E, 2012, J CELL SCI, V125, P5578, DOI 10.1242/jcs.106815
   Kanwal S, 2013, PLOS ONE, V8, DOI 10.1371/journal.pone.0069150
   Kawauchi K, 2008, NAT CELL BIOL, V10, P611, DOI 10.1038/ncb1724
   Kawauchi K, 2009, P NATL ACAD SCI USA, V106, P3431, DOI 10.1073/pnas.0813210106
   KEARSE KP, 1991, P NATL ACAD SCI USA, V88, P1701, DOI 10.1073/pnas.88.5.1701
   Koo CY, 2012, BBA-GENE REGUL MECH, V1819, P28, DOI 10.1016/j.bbagrm.2011.09.004
   Krzeslak A, 2012, GINEKOL POL, V83, P22
   Krzeslak A, 2012, CLIN EXP MED, V12, P61, DOI 10.1007/s10238-011-0138-5
   Krzeslak A, 2010, INT J MOL MED, V25, P643, DOI 10.3892/ijmm_00000387
   Kuo M, 2008, BIOCHIMIE, V90, P679, DOI 10.1016/j.biochi.2008.03.005
   Kuo M, 2008, FEBS LETT, V582, P829, DOI 10.1016/j.febslet.2008.02.010
   Kwei KA, 2012, PLOS ONE, V7, DOI 10.1371/journal.pone.0046518
   Lee TI, 2013, CELL, V152, P1237, DOI 10.1016/j.cell.2013.02.014
   Lefebvre T, 2004, EUR J BIOCHEM, V271, P3843, DOI 10.1111/j.1432-1033.2004.04316.x
   Lefebvre T, 2010, BBA-GEN SUBJECTS, V1800, P67, DOI 10.1016/j.bbagen.2009.08.008
   Lynch TP, 2012, J BIOL CHEM, V287, P11070, DOI 10.1074/jbc.M111.302547
   Ma ZY, 2013, J BIOL CHEM, V288, P15121, DOI 10.1074/jbc.M113.470047
   Mariappa D, 2013, EMBO J, V32, P612, DOI 10.1038/emboj.2013.26
   Masui Y, 2001, DIFFERENTIATION, V69, P1, DOI 10.1046/j.1432-0436.2001.690101.x
   MASUI Y, 1971, J EXP ZOOL, V177, P129, DOI 10.1002/jez.1401770202
   Mauro C, 2011, NAT CELL BIOL, V13, P1272, DOI 10.1038/ncb2324
   Meyer N, 2008, NAT REV CANCER, V8, P976, DOI 10.1038/nrc2231
   Meylan E, 2009, NATURE, V462, P104, DOI 10.1038/nature08462
   Mi WY, 2011, BBA-MOL BASIS DIS, V1812, P514, DOI 10.1016/j.bbadis.2011.01.009
   Murnion ME, 2001, J BIOL CHEM, V276, P26656, DOI 10.1074/jbc.M102288200
   Olivier-Van Stichelen S, 2012, ONCOGENESIS, V1, DOI 10.1038/oncsis.2012.36
   Olivier-Van Stichelen Stephanie, 2012, Am J Physiol Endocrinol Metab, V302, pE417, DOI 10.1152/ajpendo.00390.2011
   Oren M, 2010, CSH PERSPECT BIOL, V2, DOI 10.1101/cshperspect.a001107
   Ozcan S, 2010, BBA-GENE REGUL MECH, V1799, P353, DOI 10.1016/j.bbagrm.2010.02.005
   Pais R, 2009, WORLD J GASTROENTERO, V15, P5141, DOI 10.3748/wjg.15.5141
   Park SY, 2010, EMBO J, V29, P3787, DOI 10.1038/emboj.2010.254
   PATERSON AJ, 1995, ENDOCRINOLOGY, V136, P2809, DOI 10.1210/en.136.7.2809
   Perez-Cervera Y, 2013, FASEB J, V27, P3478, DOI 10.1096/fj.12-217984
   Perkins ND, 2012, NAT REV CANCER, V12, P121, DOI 10.1038/nrc3204
   Pichard C, 2008, MATURITAS, V60, P19, DOI 10.1016/j.maturitas.2008.03.002
   Pierre-Eugene C, 2012, PLOS ONE, V7, DOI 10.1371/journal.pone.0041992
   Rambaruth NDS, 2012, GLYCOBIOLOGY, V22, P839, DOI 10.1093/glycob/cws051
   Roberts DL, 2010, ANNU REV MED, V61, P301, DOI 10.1146/annurev.med.080708.082713
   Rozanski W, 2012, CLIN LAB, V58, P579
   Ruan HB, 2013, TRENDS ENDOCRIN MET, V24, P301, DOI 10.1016/j.tem.2013.02.002
   Sakabe K, 2010, P NATL ACAD SCI USA, V107, P19915, DOI 10.1073/pnas.1009023107
   Sakabe K, 2010, J BIOL CHEM, V285, P34460, DOI 10.1074/jbc.M110.158170
   Schlummer S, 2006, CHEMBIOCHEM, V7, P88, DOI 10.1002/cbic.200500212
   Shi Y, 2010, LEUKEMIA, V24, P1588, DOI 10.1038/leu.2010.152
   Simon D, 2010, DIABETES METAB, V36, P182, DOI 10.1016/j.diabet.2010.04.001
   Slawson C, 2005, J BIOL CHEM, V280, P32944, DOI 10.1074/jbc.M503396200
   Slawson C, 2010, TRENDS BIOCHEM SCI, V35, P547, DOI 10.1016/j.tibs.2010.04.005
   Slawson C, 2002, BBA-GEN SUBJECTS, V1573, P121, DOI 10.1016/S0304-4165(02)00369-0
   Slawson C, 2001, BBA-MOL BASIS DIS, V1537, P147, DOI 10.1016/S0925-4439(01)00067-9
   Slawson C, 2008, MOL BIOL CELL, V19, P4130, DOI 10.1091/mbc.E07-11-1146
   Slawson C, 2011, NAT REV CANCER, V11, P678, DOI 10.1038/nrc3114
   Soussi T, 2007, CANCER CELL, V12, P303, DOI 10.1016/j.ccr.2007.10.001
   Tai HC, 2004, J AM CHEM SOC, V126, P10500, DOI 10.1021/ja047872b
   Tornatore L, 2012, TRENDS CELL BIOL, V22, P557, DOI 10.1016/j.tcb.2012.08.001
   Valenta T, 2012, EMBO J, V31, P2714, DOI 10.1038/emboj.2012.150
   Vella P, 2013, MOL CELL, V49, P645, DOI 10.1016/j.molcel.2012.12.019
   Whelan SA, 2008, J BIOL CHEM, V283, P21411, DOI 10.1074/jbc.M800677200
   Willcox BJ, 2007, ANN NY ACAD SCI, V1114, P434, DOI 10.1196/annals.1396.037
   Willcox DC, 2009, J AM COLL NUTR, V28, p500S, DOI 10.1080/07315724.2009.10718117
   Yang WH, 2008, P NATL ACAD SCI USA, V105, P17345, DOI 10.1073/pnas.0806198105
   Yang WH, 2006, NAT CELL BIOL, V8, P1074, DOI 10.1038/ncb1470
   Yang XY, 2008, NATURE, V451, P964, DOI 10.1038/nature06668
   Yang YR, 2012, AGING CELL, V11, P439, DOI 10.1111/j.1474-9726.2012.00801.x
   Yi W, 2012, SCIENCE, V337, P975, DOI 10.1126/science.1222278
   Zhang SS, 2011, J BIOL CHEM, V286, P37483, DOI 10.1074/jbc.M111.284885
   Zhang ZJ, 2012, J CLIN ENDOCR METAB, V97, P2347, DOI 10.1210/jc.2012-1267
   Zhu QQ, 2012, MED ONCOL, V29, P985, DOI 10.1007/s12032-011-9912-1
NR 127
TC 163
Z9 169
U1 2
U2 29
PU FRONTIERS MEDIA SA
PI LAUSANNE
PA PO BOX 110, EPFL INNOVATION PARK, BUILDING I, LAUSANNE, 1015,
   SWITZERLAND
SN 1664-2392
J9 FRONT ENDOCRINOL
JI Front. Endocrinol.
PD AUG 12
PY 2013
VL 4
AR 99
DI 10.3389/fendo.2013.00099
PG 14
WC Endocrinology & Metabolism
WE Science Citation Index Expanded (SCI-EXPANDED)
SC Endocrinology & Metabolism
GA V03AH
UT WOS:000213709800001
PM 23964270
OA Green Published, gold
DA 2022-04-10
ER

PT J
AU Gygi, SP
   Han, DKM
   Gingras, AC
   Sonenberg, N
   Aebersold, R
AF Gygi, SP
   Han, DKM
   Gingras, AC
   Sonenberg, N
   Aebersold, R
TI Protein analysis by mass spectrometry and sequence database searching:
   Tools for cancer research in the post-genomic era
SO ELECTROPHORESIS
LA English
DT Article
DE cancer; immunoprecipitation; mass spectrometry; protein identification;
   phosphorylation
ID AMINO-ACID-SEQUENCES; POLYACRYLAMIDE GELS; T-CELLS; IDENTIFICATION;
   ELECTROPHORESIS; PHOSPHORYLATION; PEPTIDES; SITES; PHOSPHOPEPTIDES
AB The post-genomic era is characterized by the deposition of sequence information for entire genomes in databases. Currently, besides the protein sequences for known human proteins, there are partial sequences from thousands more human proteins for which no biological function has been assigned. A powerful new tool for the unambiguous identification and characterization of gel-separated proteins is accomplished by the combination of mass spectrometry and sequence database searching. This combination provides the cancer biologist with the ability to (i) identify the potential protein:protein associations and (ii) fully characterize function-critical post-translational modification, both directly from silver-stained polyacrylamide gels. In this report we describe the application of tandem mass spectrometry and database searching to two problems which are prototypical for cancer research and indeed for biomedical research in general. The first is the identification of gel-separated, low abundance proteins based on amino acid sequence composition following coimmunoprecipitation with the human apoptosis inhibitor protein BclX(L). The second is the determination of the precise sites of phosphorylation of the human regulatory protein 4E-BP1, which controls mRNA translation.
C1 Univ Washington, Dept Mol Biotechnol, Seattle, WA 98195 USA.
   McGill Univ, Dept Biochem, Montreal, PQ, Canada.
RP Aebersold, R (corresponding author), Univ Washington, Dept Mol Biotechnol, Box 357730, Seattle, WA 98195 USA.
EM ruedi@u.washington.edu
RI Gingras, Anne-Claude/ABA-8341-2020; Gingras, Anne-Claude/E-9982-2010
OI Gingras, Anne-Claude/0000-0002-6090-4437; Gingras,
   Anne-Claude/0000-0002-6090-4437
FU NHGRI NIH HHSUnited States Department of Health & Human ServicesNational
   Institutes of Health (NIH) - USANIH National Human Genome Research
   Institute (NHGRI) [T32HG00035-3] Funding Source: Medline; NATIONAL HUMAN
   GENOME RESEARCH INSTITUTEUnited States Department of Health & Human
   ServicesNational Institutes of Health (NIH) - USANIH National Human
   Genome Research Institute (NHGRI) [T32HG000035] Funding Source: NIH
   RePORTER
CR AEBERSOLD RH, 1987, P NATL ACAD SCI USA, V84, P6970, DOI 10.1073/pnas.84.20.6970
   AEBERSOLD RH, 1986, J BIOL CHEM, V261, P4229
   AMANKWA LN, 1995, PROTEIN SCI, V4, P113
   BISHOP JM, 1991, CELL, V64, P235, DOI 10.1016/0092-8674(91)90636-D
   Carr SA, 1996, ANAL BIOCHEM, V239, P180, DOI 10.1006/abio.1996.0313
   Dongre AR, 1997, TRENDS BIOTECHNOL, V15, P418, DOI 10.1016/S0167-7799(97)01110-4
   Ducret A, 1998, PROTEIN SCI, V7, P706, DOI 10.1002/pro.5560070320
   ENG JK, 1994, J AM SOC MASS SPECTR, V5, P976, DOI 10.1016/1044-0305(94)80016-2
   FIELDS S, 1989, NATURE, V340, P245, DOI 10.1038/340245a0
   Figeys D, 1996, NAT BIOTECHNOL, V14, P1579, DOI 10.1038/nbt1196-1579
   Gingras AC, 1998, GENE DEV, V12, P502, DOI 10.1101/gad.12.4.502
   Han DKM, 1997, P NATL ACAD SCI USA, V94, P11333, DOI 10.1073/pnas.94.21.11333
   Haynes PA, 1998, ELECTROPHORESIS, V19, P939, DOI 10.1002/elps.1150190609
   HOCKENBERY DM, 1994, J CELL SCI, P51
   HUNTER AP, 1994, RAPID COMMUN MASS SP, V8, P559, DOI 10.1002/rcm.1290080713
   Hunter T, 1997, CELL, V88, P333, DOI 10.1016/S0092-8674(00)81872-3
   Link AJ, 1997, ELECTROPHORESIS, V18, P1314, DOI 10.1002/elps.1150180808
   Olopade OI, 1997, CANCER J SCI AM, V3, P230
   PATTERSON SD, 1995, ELECTROPHORESIS, V16, P1791, DOI 10.1002/elps.11501601299
   Rao PH, 1998, BLOOD, V92, P234, DOI 10.1182/blood.V92.1.234.413k22_234_240
   RODRIGUES CA, 1994, CURR OPIN GENET DEV, V4, P15, DOI 10.1016/0959-437X(94)90086-8
   Shevchenko A, 1996, ANAL CHEM, V68, P850, DOI 10.1021/ac950914h
   Sonenberg N, 1993, CURR OPIN CELL BIOL, V5, P955, DOI 10.1016/0955-0674(93)90076-3
   Stefanaki K, 1998, ANTICANCER RES, V18, P1167
   Svitkin YV, 1998, J VIROL, V72, P5811, DOI 10.1128/JVI.72.7.5811-5819.1998
   Vallorani L, 1998, ANAL BIOCHEM, V258, P376, DOI 10.1006/abio.1998.2593
   VANDERGEER P, 1994, ELECTROPHORESIS, V15, P544, DOI 10.1002/elps.1150150173
   Watts JD, 1996, ACS SYM SER, V619, P381
   WATTS JD, 1994, J BIOL CHEM, V269, P29520
   WETTENHALL REH, 1991, METHOD ENZYMOL, V201, P186
   Yan JX, 1996, J CHROMATOGR A, V736, P291, DOI 10.1016/0021-9673(95)01285-0
   YATES JR, 1995, ANAL CHEM, V67, P1426, DOI 10.1021/ac00104a020
   Zhang L, 1997, SCIENCE, V276, P1268, DOI 10.1126/science.276.5316.1268
NR 33
TC 83
Z9 88
U1 0
U2 10
PU WILEY
PI HOBOKEN
PA 111 RIVER ST, HOBOKEN 07030-5774, NJ USA
SN 0173-0835
EI 1522-2683
J9 ELECTROPHORESIS
JI Electrophoresis
PD FEB
PY 1999
VL 20
IS 2
BP 310
EP 319
DI 10.1002/(SICI)1522-2683(19990201)20:2<310::AID-ELPS310>3.0.CO;2-M
PG 10
WC Biochemical Research Methods; Chemistry, Analytical
WE Science Citation Index Expanded (SCI-EXPANDED)
SC Biochemistry & Molecular Biology; Chemistry
GA 176KD
UT WOS:000079149500013
PM 10197438
DA 2022-04-10
ER

PT J
AU Gao, CX
   Xiao, GT
   Hu, J
AF Gao, Chenxi
   Xiao, Gutian
   Hu, Jing
TI Regulation of Wnt/beta-catenin signaling by posttranslational
   modifications
SO CELL AND BIOSCIENCE
LA English
DT Review
DE The Wnt/beta-catenin pathway; post-translational modification;
   Phosphorylaiton; Ubiquitination; Sumoylation; Acetylation;
   ADP-ribosylation
ID GLYCOGEN-SYNTHASE KINASE-3; ADENOMATOUS POLYPOSIS-COLI; WNT CORECEPTOR
   LRP6; E3 ubiquitinationLIGASE; F-BOX PROTEIN; TRANSCRIPTION FACTOR TCF;
   AXIN-BINDING PROTEIN; BETA-CATENIN; TUMOR-SUPPRESSOR; DEPENDENT
   PHOSPHORYLATION
AB The canonical Wnt signaling pathway (or Wnt/beta-catenin pathway) plays a pivotal role in embryonic development and adult homeostasis; deregulation of the Wnt pathway contributes to the initiation and progression of human diseases including cancer. Despite its importance in human biology and disease, how regulation of the Wnt/beta-catenin pathway is achieved remains largely undefined. Increasing evidence suggests that post-translational modification (PTMs) of Wnt pathway components are essential for the activation of the Wnt/beta-catenin pathway. PTMs create a highly dynamic relay system that responds to Wnt stimulation without requiring de novo protein synthesis and offer a platform for non-Wnt pathway components to be involved in the regulation of Wnt signaling, hence providing alternative opportunities for targeting the Wnt pathway. This review highlights the current status of PTM-mediated regulation of the Wnt/beta-catenin pathway with a focus on factors involved in Wnt-mediated stabilization of beta-catenin.
C1 [Gao, Chenxi; Hu, Jing] Univ Pittsburgh, Dept Pharmacol & Chem Biol, Sch Med, Pittsburgh, PA 15213 USA.
   [Xiao, Gutian] Univ Pittsburgh, Dept Microbiol & Mol Genet, Sch Med, Pittsburgh, PA 15213 USA.
   [Gao, Chenxi; Xiao, Gutian; Hu, Jing] Univ Pittsburgh, Inst Canc, Hillman Canc Ctr, Pittsburgh, PA 15213 USA.
RP Hu, J (corresponding author), Univ Pittsburgh, Dept Pharmacol & Chem Biol, Sch Med, Pittsburgh, PA 15213 USA.
EM huj3@upmc.edu
FU USPHSUnited States Department of Health & Human ServicesUnited States
   Public Health Service [CA166197]; NATIONAL CANCER INSTITUTEUnited States
   Department of Health & Human ServicesNational Institutes of Health (NIH)
   - USANIH National Cancer Institute (NCI) [R21CA175202, R01CA166197]
   Funding Source: NIH RePORTER
FX This work was supported in part by USPHS grant CA166197 awarded to Jing
   Hu.
CR Aberle H, 1997, EMBO J, V16, P3797, DOI 10.1093/emboj/16.13.3797
   Abrami L, 2008, P NATL ACAD SCI USA, V105, P5384, DOI 10.1073/pnas.0710389105
   Anastas JN, 2013, NAT REV CANCER, V13, P11, DOI 10.1038/nrc3419
   Angers S, 2006, NAT CELL BIOL, V8, P348, DOI 10.1038/ncb1381
   Angers S, 2009, NAT REV MOL CELL BIO, V10, P468, DOI 10.1038/nrm2717
   Arce L, 2009, BMC CANCER, V9, DOI 10.1186/1471-2407-9-159
   Ballou LM, 2001, J BIOL CHEM, V276, P40910, DOI 10.1074/jbc.M103480200
   Behrens J, 1998, SCIENCE, V280, P596, DOI 10.1126/science.280.5363.596
   Bignell GR, 2000, NAT GENET, V25, P160, DOI 10.1038/76006
   Bikkavilli RK, 2008, J CELL SCI, V121, P3598, DOI 10.1242/jcs.032854
   Bilic J, 2007, SCIENCE, V316, P1619, DOI 10.1126/science.1137065
   Buescher JL, 2010, J BIOL CHEM, V285, P7957, DOI 10.1074/jbc.M109.091603
   Cadigan KM, 2009, CSH PERSPECT BIOL, V1, DOI 10.1101/cshperspect.a002881
   Cadigan KM, 1998, CELL, V93, P767, DOI 10.1016/S0092-8674(00)81438-5
   Callow MG, 2011, PLOS ONE, V6, DOI 10.1371/journal.pone.0022595
   Carter S, 2008, CELL CYCLE, V7, P2519, DOI 10.4161/cc.7.16.6422
   Cervenka I, 2011, MOL CELL BIOL, V31, P179, DOI 10.1128/MCB.00550-10
   Chen MY, 2009, J BIOL CHEM, V284, P35040, DOI 10.1074/jbc.M109.047456
   Chen ZJJ, 2009, MOL CELL, V33, P275, DOI 10.1016/j.molcel.2009.01.014
   Chitalia VC, 2008, NAT CELL BIOL, V10, P1208, DOI 10.1038/ncb1781
   Choi HK, 2011, MOL CELL, V43, P203, DOI 10.1016/j.molcel.2011.05.027
   Choi J, 2004, J BIOL CHEM, V279, P49188, DOI 10.1074/jbc.M404655200
   Choudhary C, 2009, SCIENCE, V325, P834, DOI 10.1126/science.1175371
   Clevers H, 2006, CELL, V127, P469, DOI 10.1016/j.cell.2006.10.018
   Clevers H, 2012, CELL, V149, P1192, DOI 10.1016/j.cell.2012.05.012
   Cohen P, 2001, EUR J BIOCHEM, V268, P5001, DOI 10.1046/j.0014-2956.2001.02473.x
   Cohen P, 2001, NAT REV MOL CELL BIO, V2, P769, DOI 10.1038/35096075
   Cole A, 2004, BIOCHEM J, V377, P249, DOI 10.1042/BJ20031259
   Cong F, 2004, DEVELOPMENT, V131, P5103, DOI 10.1242/dev.01318
   CROSS DAE, 1995, NATURE, V378, P785, DOI 10.1038/378785a0
   Cruciat CM, 2013, SCIENCE, V339, P1436, DOI 10.1126/science.1231499
   Cselenyi CS, 2008, P NATL ACAD SCI USA, V105, P8032, DOI 10.1073/pnas.0803025105
   Dajani R, 2001, CELL, V105, P721, DOI 10.1016/S0092-8674(01)00374-9
   Dajani R, 2003, EMBO J, V22, P494, DOI 10.1093/emboj/cdg068
   Daniels DL, 2005, NAT STRUCT MOL BIOL, V12, P364, DOI 10.1038/nsmb912
   Dao KHT, 2012, BLOOD, V120, P323, DOI 10.1182/blood-2011-11-388355
   Davidson G, 2005, NATURE, V438, P867, DOI 10.1038/nature04170
   Davidson G, 2009, DEV CELL, V17, P788, DOI 10.1016/j.devcel.2009.11.006
   De A, 2011, ACTA BIOCH BIOPH SIN, V43, P745, DOI 10.1093/abbs/gmr079
   Deribe YL, 2010, NAT STRUCT MOL BIOL, V17, P666, DOI 10.1038/nsmb.1842
   Desbois-Mouthon C, 2001, ONCOGENE, V20, P252, DOI 10.1038/sj.onc.1204064
   Ding QQ, 2005, MOL CELL, V19, P159, DOI 10.1016/j.molcel.2005.06.009
   Ding VW, 2000, J BIOL CHEM, V275, P32475, DOI 10.1074/jbc.M005342200
   Ding Y, 2013, J BIOL CHEM, V288, P8289, DOI 10.1074/jbc.M112.433185
   Djiane A, 2005, CELL, V121, P621, DOI 10.1016/j.cell.2005.03.014
   Doble BW, 2007, DEV CELL, V12, P957, DOI 10.1016/j.devcel.2007.04.001
   Doble BW, 2003, J CELL SCI, V116, P1175, DOI 10.1242/jcs.00384
   Dohmen RJ, 2004, BBA-MOL CELL RES, V1695, P113, DOI 10.1016/j.bbamcr.2004.09.021
   Du C, 2012, PLOS ONE, V7, DOI 10.1371/journal.pone.0033830
   Elfert S, 2013, PLOS ONE, V8, DOI 10.1371/journal.pone.0061867
   Eun Jeoung Lee, 2008, Open Biochem J, V2, P67, DOI 10.2174/1874091X00802010067
   Failor KL, 2007, MOL ENDOCRINOL, V21, P2403, DOI 10.1210/me.2007-0143
   Fang DX, 2007, J BIOL CHEM, V282, P11221, DOI 10.1074/jbc.M611871200
   Fang XJ, 2000, P NATL ACAD SCI USA, V97, P11960, DOI 10.1073/pnas.220413597
   Fei C, 2013, MOL CELL BIOL, V33, P4095, DOI 10.1128/MCB.00418-13
   Feijs KLH, 2013, CELL COMMUN SIGNAL, V11, DOI 10.1186/1478-811X-11-5
   Fiedler M, 2011, P NATL ACAD SCI USA, V108, P1937, DOI 10.1073/pnas.1017063108
   Firestein R, 2008, PLOS ONE, V3, DOI 10.1371/journal.pone.0002020
   Frame S, 2001, MOL CELL, V7, P1321, DOI 10.1016/S1097-2765(01)00253-2
   Fraser E, 2002, J BIOL CHEM, V277, P2176, DOI 10.1074/jbc.M109462200
   Fuchs SY, 2004, ONCOGENE, V23, P2028, DOI 10.1038/sj.onc.1207389
   Fukumoto S, 2001, J BIOL CHEM, V276, P17479, DOI 10.1074/jbc.C000880200
   Gao C, 2010, NAT CELL BIOL, V12, P781, DOI 10.1038/ncb2082
   Gao C, 2010, CELL SIGNAL, V22, P717, DOI 10.1016/j.cellsig.2009.11.021
   Gareau JR, 2010, NAT REV MOL CELL BIO, V11, P861, DOI 10.1038/nrm3011
   Gay F, 2003, GENE DEV, V17, P717, DOI 10.1101/gad.1042403
   Ge XJ, 2009, MOL BIOL CELL, V20, P419, DOI 10.1091/mbc.E08-08-0792
   Gerard B, 2012, BBA-MOL CELL RES, V1823, P1686, DOI 10.1016/j.bbamcr.2012.05.032
   Glickman MH, 2002, PHYSIOL REV, V82, P373, DOI 10.1152/physrev.00027.2001
   Glozak MA, 2005, GENE, V363, P15, DOI 10.1016/j.gene.2005.09.010
   Gonzalez-Sancho JM, 2004, MOL CELL BIOL, V24, P4757, DOI 10.1128/MCB.24.11.4757-4768.2004
   Gonzalez-Sancho JM, 2013, J BIOL CHEM, V288, P9428, DOI 10.1074/jbc.M112.448480
   Guan KL, 2011, TRENDS BIOCHEM SCI, V36, P108, DOI 10.1016/j.tibs.2010.09.003
   Guo ZG, 2012, MOL CELL, V47, P444, DOI 10.1016/j.molcel.2012.05.042
   Ha NC, 2004, MOL CELL, V15, P511, DOI 10.1016/j.molcel.2004.08.010
   Habas R, 2006, DEV CELL, V11, P138, DOI 10.1016/j.devcel.2006.07.009
   Haglund K, 2012, J CELL SCI, V125, P265, DOI 10.1242/jcs.091280
   Hammerlein A, 2005, CELL MOL LIFE SCI, V62, P606, DOI 10.1007/s00018-005-4507-7
   Hao HX, 2012, NATURE, V485, P195, DOI 10.1038/nature11019
   Hart M, 1999, CURR BIOL, V9, P207, DOI 10.1016/S0960-9822(99)80091-8
   Hart MJ, 1998, CURR BIOL, V8, P573, DOI 10.1016/S0960-9822(98)70226-X
   Hassa PO, 2006, MICROBIOL MOL BIOL R, V70, P789, DOI 10.1128/MMBR.00040-05
   Hay-Koren A, 2011, MOL BIOL CELL, V22, P399, DOI 10.1091/mbc.E10-05-0440
   Hernandez AR, 2012, SCIENCE, V338, P1337, DOI 10.1126/science.1228734
   Hershko A, 1998, ANNU REV BIOCHEM, V67, P425, DOI 10.1146/annurev.biochem.67.1.425
   Hikasa H, 2011, J BIOL CHEM, V286, DOI 10.1074/jbc.M110.185280
   Hikasa H, 2010, DEV CELL, V19, P521, DOI 10.1016/j.devcel.2010.09.005
   Hino S, 2003, J BIOL CHEM, V278, P14066, DOI 10.1074/jbc.M213265200
   Hino S, 2005, MOL CELL BIOL, V25, P9063, DOI 10.1128/MCB.25.20.9063-9072.2005
   Hinoi T, 2000, J BIOL CHEM, V275, P34399, DOI 10.1074/jbc.M003997200
   Tran H, 2013, J BIOL CHEM, V288, P3753, DOI 10.1074/jbc.M112.415240
   Tran H, 2012, J BIOL CHEM, V287, P28552, DOI 10.1074/jbc.M112.387878
   Hsu SC, 1998, MOL CELL BIOL, V18, P4807, DOI 10.1128/MCB.18.8.4807
   Huang H, 2008, CURR OPIN CELL BIOL, V20, P119, DOI 10.1016/j.ceb.2008.01.009
   Huang J, 2012, NAT COMMUN, V3, DOI 10.1038/ncomms1919
   Huang SMA, 2009, NATURE, V461, P614, DOI 10.1038/nature08356
   Huang XD, 2013, SCIENCE, V339, P1441, DOI 10.1126/science.1232253
   Huang XH, 2009, J MOL BIOL, V391, P691, DOI 10.1016/j.jmb.2009.06.066
   HUGHES K, 1993, EMBO J, V12, P803, DOI 10.1002/j.1460-2075.1993.tb05715.x
   Hunter T, 2007, MOL CELL, V28, P730, DOI 10.1016/j.molcel.2007.11.019
   Ikeda F, 2008, EMBO REP, V9, P536, DOI 10.1038/embor.2008.93
   Ikeda S, 1998, EMBO J, V17, P1371, DOI 10.1093/emboj/17.5.1371
   Ikeda S, 2000, ONCOGENE, V19, P537, DOI 10.1038/sj.onc.1203359
   Ishitani T, 2005, NAT CELL BIOL, V7, P1106, DOI 10.1038/ncb1311
   Ishitani T, 2003, MOL CELL BIOL, V23, P1379, DOI 10.1128/MCB.23.4.1379-1389.2003
   Ishitani T, 1999, NATURE, V399, P798, DOI 10.1038/21674
   Itoh K, 1995, DEVELOPMENT, V121, P3979
   James RG, 2012, PLOS ONE, V7, DOI 10.1371/journal.pone.0050457
   Jensen ON, 2006, NAT REV MOL CELL BIO, V7, P391, DOI 10.1038/nrm1939
   Jho EH, 1999, BIOCHEM BIOPH RES CO, V266, P28, DOI 10.1006/bbrc.1999.1760
   Jiang J, 1998, NATURE, V391, P493, DOI 10.1038/35154
   Johnson ES, 2004, ANNU REV BIOCHEM, V73, P355, DOI 10.1146/annurev.biochem.73.011303.074118
   Jung H, 2013, ONCOGENESIS, V2, DOI 10.1038/oncsis.2013.28
   Kadoya T, 2000, J BIOL CHEM, V275, P37030, DOI 10.1074/jbc.M005984200
   Kadoya T, 2002, MOL CELL BIOL, V22, P3803, DOI 10.1128/MCB.22.11.3803-3819.2002
   Kang HC, 2011, P NATL ACAD SCI USA, V108, P14103, DOI 10.1073/pnas.1108799108
   Ke JY, 2013, CURR OPIN LIPIDOL, V24, P129, DOI 10.1097/MOL.0b013e32835df2bf
   Kerscher O, 2007, EMBO REP, V8, P550, DOI 10.1038/sj.embor.7400980
   Kim MJ, 2008, FASEB J, V22, P3785, DOI 10.1096/fj.08-113910
   Kim MY, 2005, GENE DEV, V19, P1951, DOI 10.1101/gad.1331805
   Kim S, 2010, J BIOL CHEM, V285, P36420, DOI 10.1074/jbc.M110.137471
   Kim SE, 2013, SCIENCE, V340, P867, DOI 10.1126/science.1232389
   Kirisako T, 2006, EMBO J, V25, P4877, DOI 10.1038/sj.emboj.7601360
   Kishida M, 1999, ONCOGENE, V18, P979, DOI 10.1038/sj.onc.1202388
   Kishida S, 1999, MOL CELL BIOL, V19, P4414
   Kitagawa M, 1999, EMBO J, V18, P2401, DOI 10.1093/emboj/18.9.2401
   Klein TJ, 2006, CURR BIOL, V16, P1337, DOI 10.1016/j.cub.2006.06.030
   Klimowski LK, 2006, FEBS J, V273, P4594, DOI 10.1111/j.1742-4658.2006.05462.x
   Kohn AD, 2005, CELL CALCIUM, V38, P439, DOI 10.1016/j.ceca.2005.06.022
   Komander D, 2009, BIOCHEM SOC T, V37, P937, DOI 10.1042/BST0370937
   Koo BK, 2012, NATURE, V488, P665, DOI 10.1038/nature11308
   Kravtsova-Ivantsiv Y, 2012, J CELL SCI, V125, P539, DOI 10.1242/jcs.093567
   Kubota Y, 2011, NAT CELL BIOL, V13, P282, DOI 10.1038/ncb2169
   Kulathu Y, 2012, NAT REV MOL CELL BIO, V13, P508, DOI 10.1038/nrm3394
   Latres E, 1999, ONCOGENE, V18, P849, DOI 10.1038/sj.onc.1202653
   Lee E, 2003, PLOS BIOL, V1, P116, DOI 10.1371/journal.pbio.0000010
   Lee E, 2001, J CELL BIOL, V154, P983, DOI 10.1083/jcb.200102074
   Lee JS, 1999, J BIOL CHEM, V274, P21464, DOI 10.1074/jbc.274.30.21464
   Levy L, 2004, MOL CELL BIOL, V24, P3404, DOI 10.1128/MCB.24.8.3404-3414.2004
   Li J, 2008, NAT CELL BIOL, V10, P160, DOI 10.1038/ncb1684
   Li MY, 2003, SCIENCE, V302, P1972, DOI 10.1126/science.1091362
   Li VSW, 2012, CELL, V149, P1245, DOI 10.1016/j.cell.2012.05.002
   Liu CM, 2002, CELL, V108, P837, DOI 10.1016/S0092-8674(02)00685-2
   Liu CM, 1999, P NATL ACAD SCI USA, V96, P6273, DOI 10.1073/pnas.96.11.6273
   Liu XX, 2005, CURR BIOL, V15, P1989, DOI 10.1016/j.cub.2005.10.050
   Logan CY, 2004, ANNU REV CELL DEV BI, V20, P781, DOI 10.1146/annurev.cellbio.20.010403.113126
   Lui TTH, 2011, MOL CELL BIOL, V31, P2053, DOI 10.1128/MCB.01094-10
   Lundby A, 2012, CELL REP, V2, P419, DOI 10.1016/j.celrep.2012.07.006
   Luo JY, 2007, LAB INVEST, V87, P97, DOI 10.1038/labinvest.3700509
   Luo W, 2007, EMBO J, V26, P1511, DOI 10.1038/sj.emboj.7601607
   MacDonald BT, 2008, J BIOL CHEM, V283, P16115, DOI 10.1074/jbc.M800327200
   MacDonald BT, 2011, PLOS ONE, V6, DOI 10.1371/journal.pone.0023537
   MacDonald BT, 2009, DEV CELL, V17, P9, DOI 10.1016/j.devcel.2009.06.016
   Mahmoudi T, 2009, EMBO J, V28, P3329, DOI 10.1038/emboj.2009.285
   Mao JH, 2001, MOL CELL, V7, P801, DOI 10.1016/S1097-2765(01)00224-6
   Matunis MJ, 1996, J CELL BIOL, V135, P1457, DOI 10.1083/jcb.135.6.1457
   McManus EJ, 2005, EMBO J, V24, P1571, DOI 10.1038/sj.emboj.7600633
   Mi KH, 2006, J BIOL CHEM, V281, P4787, DOI 10.1074/jbc.M508657200
   Miyazaki K, 2004, J BIOL CHEM, V279, P11327, DOI 10.1074/jbc.M312389200
   Mukai A, 2010, EMBO J, V29, P2114, DOI 10.1038/emboj.2010.100
   Mukhopadhyay D, 2007, SCIENCE, V315, P201, DOI 10.1126/science.1127085
   Murr R, 2010, ADV GENET, V70, P101, DOI [10.1016/S0065-2660(10)70005-5, 10.1016/B978-0-12-380866-0.60005-8]
   Niehrs C, 2010, CELL MOL LIFE SCI, V67, P2551, DOI 10.1007/s00018-010-0329-3
   Nusse R, 2012, EMBO J, V31, P2670, DOI 10.1038/emboj.2012.146
   Pan WJ, 2008, SCIENCE, V321, P1350, DOI 10.1126/science.1160741
   Panchenko MV, 2004, J BIOL CHEM, V279, P56032, DOI 10.1074/jbc.M410487200
   Papkoff J, 1996, MOL CELL BIOL, V16, P2128
   Peifer M, 2000, SCIENCE, V287, P1606, DOI 10.1126/science.287.5458.1606
   PEIFER M, 1994, DEV BIOL, V166, P543, DOI 10.1006/dbio.1994.1336
   Petroski MD, 2005, NAT REV MOL CELL BIO, V6, P9, DOI 10.1038/nrm1547
   Piao S, 2008, PLOS ONE, V3, DOI 10.1371/journal.pone.0004046
   Pickart CM, 2004, BBA-MOL CELL RES, V1695, P55, DOI 10.1016/j.bbamcr.2004.09.019
   Polakis P, 2000, GENE DEV, V14, P1837
   Polakis P, 2012, EMBO J, V31, P2737, DOI 10.1038/emboj.2012.126
   Roose J, 1998, NATURE, V395, P608, DOI 10.1038/26989
   Rubinfeld B, 2001, J BIOL CHEM, V276, P39037, DOI 10.1074/jbc.M105148200
   Rubinfeld B, 1996, SCIENCE, V272, P1023, DOI 10.1126/science.272.5264.1023
   Rui HL, 2002, J BIOL CHEM, V277, P42981, DOI 10.1074/jbc.M208099200
   Sachdev S, 2001, GENE DEV, V15, P3088, DOI 10.1101/gad.944801
   Salic A, 2000, MOL CELL, V5, P523, DOI 10.1016/S1097-2765(00)80446-3
   Sayas CL, 2006, MOL BIOL CELL, V17, P1834, DOI 10.1091/mbc.E05-07-0688
   Schnell JD, 2003, J BIOL CHEM, V278, P35857, DOI 10.1074/jbc.R300018200
   Schreiber V, 2006, NAT REV MOL CELL BIO, V7, P517, DOI 10.1038/nrm1963
   Schwarz-Romond T, 2007, J CELL SCI, V120, P2402, DOI 10.1242/jcs.002956
   Schwarz-Romond T, 2007, NAT STRUCT MOL BIOL, V14, P484, DOI 10.1038/nsmb1247
   Sharma J, 2012, J BIOL CHEM, V287, P6830, DOI 10.1074/jbc.M111.315135
   Shekhar MPV, 2008, CANCER RES, V68, P1741, DOI 10.1158/0008-5472.CAN-07-2111
   Shitashige M, 2010, CANCER RES, V70, P5024, DOI 10.1158/0008-5472.CAN-10-0306
   Smalley MJ, 1999, EMBO J, V18, P2823, DOI 10.1093/emboj/18.10.2823
   Sorkin A, 2009, RES PER ALZ, P141, DOI 10.1007/978-3-540-87941-1_11
   Spange S, 2009, INT J BIOCHEM CELL B, V41, P185, DOI 10.1016/j.biocel.2008.08.027
   Stamos JL, 2013, CSH PERSPECT BIOL, V5, DOI 10.1101/cshperspect.a007898
   Sterner DE, 2000, MICROBIOL MOL BIOL R, V64, P435, DOI 10.1128/MMBR.64.2.435-459.2000
   Strahl BD, 2000, NATURE, V403, P41, DOI 10.1038/47412
   Strovel ET, 2000, J BIOL CHEM, V275, P2399, DOI 10.1074/jbc.275.4.2399
   Struhl K, 1998, GENE DEV, V12, P599, DOI 10.1101/gad.12.5.599
   Sun TQ, 2001, NAT CELL BIOL, V3, P628, DOI 10.1038/35083016
   Swiatek W, 2006, J BIOL CHEM, V281, P12233, DOI 10.1074/jbc.M510580200
   Tamai K, 2004, MOL CELL, V13, P149, DOI 10.1016/S1097-2765(03)00484-2
   Tauriello DVF, 2010, CELL CYCLE, V9, P3700, DOI 10.4161/cc.9.18.13204
   Tauriello DVF, 2010, MOL CELL, V37, P607, DOI 10.1016/j.molcel.2010.01.035
   Thornton TM, 2008, SCIENCE, V320, P667, DOI 10.1126/science.1156037
   Tokunaga F, 2009, NAT CELL BIOL, V11, P123, DOI 10.1038/ncb1821
   Tran H, 2008, GENE DEV, V22, P528, DOI 10.1101/gad.463208
   Veeman MT, 2003, DEV CELL, V5, P367, DOI 10.1016/S1534-5807(03)00266-1
   Waltzer L, 1998, NATURE, V395, P521, DOI 10.1038/26785
   Wan M, 2008, GENE DEV, V22, P2968, DOI 10.1101/gad.1702708
   Wang S, 2006, CURR BIOL, V16, P2239, DOI 10.1016/j.cub.2006.09.034
   Wang YF, 2006, J BIOL CHEM, V281, P11603, DOI 10.1074/jbc.M600713200
   Wang ZZ, 2012, GENE DEV, V26, P235, DOI 10.1101/gad.182618.111
   Wei W, 2012, MOL CELL BIOL, V32, P3903, DOI 10.1128/MCB.00251-12
   Willert K, 1997, EMBO J, V16, P3089, DOI 10.1093/emboj/16.11.3089
   Willert K, 1999, GENE DEV, V13, P1768, DOI 10.1101/gad.13.14.1768
   Willert K, 2012, CSH PERSPECT BIOL, V4, DOI 10.1101/cshperspect.a007864
   Winer IS, 2006, J BIOL CHEM, V281, P26181, DOI 10.1074/jbc.M604217200
   Winston JT, 1999, GENE DEV, V13, P270, DOI 10.1101/gad.13.3.270
   Wodarz A, 1998, ANNU REV CELL DEV BI, V14, P59, DOI 10.1146/annurev.cellbio.14.1.59
   Wolf D, 2002, J BIOL CHEM, V277, P25562, DOI 10.1074/jbc.M201196200
   Wu G, 2003, MOL CELL, V11, P1445, DOI 10.1016/S1097-2765(03)00234-X
   Wu G, 2009, PLOS ONE, V4, DOI 10.1371/journal.pone.0004926
   Wu XM, 2008, CELL, V133, P340, DOI 10.1016/j.cell.2008.01.052
   Wu ZQ, 2012, P NATL ACAD SCI USA, V109, P11312, DOI 10.1073/pnas.1203015109
   Yamada M, 2006, J BIOL CHEM, V281, P20749, DOI 10.1074/jbc.M602089200
   Yamamoto A, 2005, CELL, V120, P223, DOI 10.1016/j.cell.2004.11.051
   Yamamoto H, 2003, EMBO J, V22, P2047, DOI 10.1093/emboj/cdg204
   Yamamoto H, 1999, J BIOL CHEM, V274, P10681, DOI 10.1074/jbc.274.16.10681
   Yang XJ, 2008, MOL CELL, V31, P449, DOI 10.1016/j.molcel.2008.07.002
   Yang XJ, 2004, NUCLEIC ACIDS RES, V32, P959, DOI 10.1093/nar/gkh252
   Yeh ETH, 2009, J BIOL CHEM, V284, P8223, DOI 10.1074/jbc.R800050200
   Yost C, 1996, GENE DEV, V10, P1443, DOI 10.1101/gad.10.12.1443
   Yurchenko V, 2006, MOL CELL BIOL, V26, P1786, DOI 10.1128/MCB.26.5.1786-1794.2006
   Zeng X, 2005, NATURE, V438, P873, DOI 10.1038/nature04185
   Zeng X, 2008, DEVELOPMENT, V135, P367, DOI 10.1242/dev.013540
   Zhang HH, 2006, MOL CELL, V24, P185, DOI 10.1016/j.molcel.2006.09.019
   Zhang J, 2010, ONCOGENE, V29, P539, DOI 10.1038/onc.2009.339
   Zhang Y, 2001, J BIOL CHEM, V276, P32152, DOI 10.1074/jbc.M104451200
   Zhang Y, 2011, NAT CELL BIOL, V13, P623, DOI 10.1038/ncb2222
   Zhou MI, 2002, J BIOL CHEM, V277, P39887, DOI 10.1074/jbc.M205040200
NR 238
TC 133
Z9 137
U1 4
U2 42
PU BIOMED CENTRAL LTD
PI LONDON
PA 236 GRAYS INN RD, FLOOR 6, LONDON WC1X 8HL, ENGLAND
SN 2045-3701
J9 CELL BIOSCI
JI Cell Biosci.
PD MAR 4
PY 2014
VL 4
AR 13
DI 10.1186/2045-3701-4-13
PG 20
WC Biochemistry & Molecular Biology
WE Science Citation Index Expanded (SCI-EXPANDED)
SC Biochemistry & Molecular Biology
GA AE9ZZ
UT WOS:000334372400003
PM 24594309
OA Green Published, gold, Green Accepted
DA 2022-04-10
ER

PT J
AU Blalock, WL
   Bavelloni, A
   Piazzi, M
   Tagliavini, F
   Faenza, I
   Martelli, AM
   Follo, MY
   Cocco, L
AF Blalock, W. L.
   Bavelloni, A.
   Piazzi, M.
   Tagliavini, F.
   Faenza, I.
   Martelli, A. M.
   Follo, M. Y.
   Cocco, L.
TI Multiple forms of PKR present in the nuclei of acute leukemia cells
   represent an active kinase that is responsive to stress
SO LEUKEMIA
LA English
DT Article
DE PKR; acute leukemia; post-translational modification; nucleus; mass
   spectrometry
ID DEPENDENT PROTEIN-KINASE; DOUBLE-STRANDED-RNA; ACTIVATION;
   AUTOPHOSPHORYLATION; PHOSPHORYLATION; GROWTH; LOCALIZATION;
   DIMERIZATION; INHIBITION; APOPTOSIS
AB A number of cancers possess constitutive activity of the dsRNA-dependent kinase, PKR. Inhibition of PKR in these cancers leads to tumor cell death. We recently reported the increased presence of PKR phosphorylated on Thr451 (p-T451 PKR) in clinical samples from myelodysplastic syndrome (MDS) patients and acute leukemia cell lines. Whereas p-T451 PKR in low-risk patient samples or PTEN-positive acute leukemia cell lines was mostly cytoplasmic, in high-risk patient samples and acute leukemia cell lines deficient in PTEN, p-T451 PKR was mainly nuclear. As nuclear activity of PKR has not been previously characterized, we examined the status of nuclear PKR in acute leukemia cell lines. Using antibodies to N-terminus, C-terminus and the kinase domain in conjunction with a proteomics approach, we found that PKR exists in diverse molecular weight forms in the nucleus. Analysis of PKR transcripts by reverse transcriptase-PCR, and PKR-derived peptides by MS/MS revealed that these forms were the result of post-translational modification (PTMs). Biochemical analysis demonstrated that nuclear PKR is an active kinase that can respond to stress. Given the association of PKR with PTEN and the Fanconi complex, these results indicate that PKR likely has other previously unrecognized roles in nuclear signaling that may contribute to leukemic development. Leukemia (2011) 25, 236-245; doi:10.1038/leu.2010.264; published online 12 November 2010
C1 [Blalock, W. L.; Piazzi, M.; Tagliavini, F.; Faenza, I.; Martelli, A. M.; Follo, M. Y.; Cocco, L.] Univ Bologna, Dept Human Anat Sci, Cell Signalling Lab, I-40128 Bologna, Italy.
   [Bavelloni, A.] Rizzoli Orthoped Inst, Cell Biol Lab, Bologna, Italy.
   [Piazzi, M.] Univ Modena, Dept Histol & Embryol, I-41100 Modena, Italy.
   [Martelli, A. M.] Rizzoli Orthoped Inst, Bologna Unit, IGM CNR, Bologna, Italy.
RP Cocco, L (corresponding author), Univ Bologna, Dept Human Anat Sci, Cell Signalling Lab, Via Irnerio 48, I-40128 Bologna, Italy.
EM lucio.cocco@unibo.it
RI Bavelloni, Alberto/E-5726-2019; Piazzi, Manuela/K-2147-2016; Blalock,
   William L/C-6959-2019; Faenza, Irene/AAC-4606-2022; Piazzi,
   Manuela/AAD-5016-2020; Cocco, Lucio/AAI-2206-2020; Tagliavini,
   Francesca/N-5154-2015
OI Bavelloni, Alberto/0000-0002-6467-1431; Piazzi,
   Manuela/0000-0002-9072-2757; Blalock, William L/0000-0002-8045-4840;
   Faenza, Irene/0000-0002-5227-3567; Piazzi, Manuela/0000-0002-9072-2757;
   Cocco, Lucio/0000-0002-9206-8277; Tagliavini,
   Francesca/0000-0001-5679-2156
FU Italian MIUR-FIRB Human ProteomeNetMinistry of Education, Universities
   and Research (MIUR)Fund for Investment in Basic Research (FIRB); Italian
   MIUR-PRINMinistry of Education, Universities and Research (MIUR)Research
   Projects of National Relevance (PRIN); CARISBO FoundationFondazione
   Carisbo
FX We thank the Cassa di Risparmio di Modena (CARISMO) for purchasing the
   Chip Cube-QTOF Instrumentation (Agilent). This work was supported by the
   Italian MIUR-FIRB Human ProteomeNet, Italian MIUR-PRIN, and CARISBO
   Foundation (to L.C.).
CR Basu S, 1997, CANCER RES, V57, P943
   Bennett RL, 2006, BLOOD, V108, P821, DOI 10.1182/blood-2005-11-006817
   Blalock WL, 2010, J CELL PHYSIOL, V223, P572, DOI 10.1002/jcp.22092
   Blalock WL, 2009, J CELL PHYSIOL, V221, P232, DOI 10.1002/jcp.21848
   Dahia PLM, 1999, HUM MOL GENET, V8, P185, DOI 10.1093/hmg/8.2.185
   Dephoure N, 2008, P NATL ACAD SCI USA, V105, P10762, DOI 10.1073/pnas.0805139105
   Dey M, 2005, CELL, V122, P901, DOI 10.1016/j.cell.2005.06.041
   Eley HL, 2009, CANCER CHEMOTH PHARM, V63, P651, DOI 10.1007/s00280-008-0782-y
   Fan C, 2009, MOL CANCER, V8, DOI 10.1186/1476-4598-8-98
   Follo MY, 2008, LEUKEMIA, V22, P2267, DOI 10.1038/leu.2008.122
   Follo MY, 2007, CANCER RES, V67, P4287, DOI 10.1158/0008-5472.CAN-06-4409
   Garcia MA, 2006, EMBO J, V25, P4284, DOI 10.1038/sj.emboj.7601302
   Jammi NV, 2003, BIOCHEM BIOPH RES CO, V308, P50, DOI 10.1016/S0006-291X(03)01318-4
   JEFFREY IW, 1995, EXP CELL RES, V218, P17, DOI 10.1006/excr.1995.1126
   Kim SH, 2002, ONCOGENE, V21, P8741, DOI 10.1038/sj.onc.1205987
   Kim SH, 2000, ONCOGENE, V19, P3086, DOI 10.1038/sj.onc.1203632
   Li SY, 2001, J BIOL CHEM, V276, P13881, DOI 10.1074/jbc.M008140200
   Liu TC, 2000, AM J HEMATOL, V63, P170, DOI 10.1002/(SICI)1096-8652(200004)63:4<170::AID-AJH2>3.0.CO;2-0
   McCubrey JA, 1998, LEUKEMIA, V12, P1903, DOI 10.1038/sj.leu.2401215
   Mounir Z, 2009, SCI SIGNAL, V2, DOI 10.1126/scisignal.2000389
   Nakamura T, 2010, CELL, V140, P338, DOI 10.1016/j.cell.2010.01.001
   Nyakern M, 2006, LEUKEMIA, V20, P230, DOI 10.1038/sj.leu.2404057
   Onuki R, 2004, EMBO J, V23, P959, DOI 10.1038/sj.emboj.7600049
   Paquet C, 2009, J NEUROPATH EXP NEUR, V68, P190, DOI 10.1097/NEN.0b013e318196cd7c
   Pataer A, 2009, CANCER BIOL THER, V8, P241
   Planchon SM, 2008, J CELL SCI, V121, P249, DOI 10.1242/jcs.022459
   ROBERTS WK, 1976, P NATL ACAD SCI USA, V73, P3136, DOI 10.1073/pnas.73.9.3136
   Romano PR, 1998, MOL CELL BIOL, V18, P2282, DOI 10.1128/MCB.18.4.2282
   Sadler AJ, 2009, PLOS PATHOG, V5, DOI 10.1371/journal.ppat.1000311
   Sakai A, 1998, BLOOD, V92, P3410, DOI 10.1182/blood.V92.9.3410.421a06_3410_3415
   Su QZ, 2006, P NATL ACAD SCI USA, V103, P63, DOI 10.1073/pnas.0508207103
   Taylor DR, 2001, J VIROL, V75, P1265, DOI 10.1128/JVI.75.3.1265-1273.2001
   von Holzen U, 2007, CLIN CANCER RES, V13, P6032, DOI 10.1158/1078-0432.CCR-06-2932
   Williams BRG, 1999, ONCOGENE, V18, P6112, DOI 10.1038/sj.onc.1203127
   Yoon CH, 2010, EMBO REP, V11, P393, DOI 10.1038/embor.2010.45
   Zhang F, 2001, J BIOL CHEM, V276, P24946, DOI 10.1074/jbc.M102108200
   Zhang XL, 2004, J BIOL CHEM, V279, P43910, DOI 10.1074/jbc.M403884200
   Zhao C, 2005, P NATL ACAD SCI USA, V102, P10200, DOI 10.1073/pnas.0504754102
NR 38
TC 34
Z9 37
U1 0
U2 6
PU NATURE PUBLISHING GROUP
PI LONDON
PA MACMILLAN BUILDING, 4 CRINAN ST, LONDON N1 9XW, ENGLAND
SN 0887-6924
EI 1476-5551
J9 LEUKEMIA
JI Leukemia
PD FEB
PY 2011
VL 25
IS 2
BP 236
EP 245
DI 10.1038/leu.2010.264
PG 10
WC Oncology; Hematology
WE Science Citation Index Expanded (SCI-EXPANDED)
SC Oncology; Hematology
GA 719GC
UT WOS:000287188600006
PM 21072047
OA Bronze
DA 2022-04-10
ER

PT J
AU Choi, WJ
AF Choi, Won Jun
TI The Heterochromatin-1 Phosphorylation Contributes to TPA-Induced AP-1
   Expression
SO BIOMOLECULES & THERAPEUTICS
LA English
DT Article
DE Activator protein-1 (AP-1); Heterochromatin 1 (HP1); Histones
ID COVALENT HISTONE MODIFICATIONS; CHROMATIN MODIFICATIONS;
   MOLECULAR-BASIS; H3; CHEMOPREVENTION; METHYLATION; MODULATION; target;
   CANCER; CODE
AB Activator protein-1 (AP-1) is an inducible transcription factor that contributes to the generation of chronic inflammation in response to oxidative and electrophilic stress. Previous studies have demonstrated that the PI3K/Akt1 pathway plays an important role in the transcriptional regulation of AP-1 expression. Although the histone post-translational modification (PTMs) are assumed to affect the AP-1 transcriptional regulation by the PI3K/Akt pathway, the detailed mechanisms are completely unknown. In the present study, we show that heterochromatin 1 gamma (HP1 gamma) plays a negative role in TPA-induced c-Jun and c-Fos expression. We show that TPA-induced Akt1 directly phosphorylates HP1 gamma, abrogates its suppressive function and increases the interaction between histone H3 and 14-3-3 epsilon. Collectively, these our data illustrate that the activation of PI3K/Akt pathway may play a permissive role in the recruitment of histone readers or other coactivators on the chromatin, thereby affecting the degree of AP-1 transcription.
C1 Dongguk Univ, Coll Pharm, Goyang 410820, South Korea.
RP Choi, WJ (corresponding author), Dongguk Univ, Coll Pharm, Goyang 410820, South Korea.
EM mp89@dongguk.edu
FU GRRC program of Gyeonggi province [GRRC-DONGGUK2013-B02]; National
   Research Foundation [2011-0011699]
FX This work was supported by the GRRC program of Gyeonggi province.
   [(GRRC-DONGGUK2013-B02), Development and discovery of new therapeutic
   target modulators], and National Research Foundation (2011-0011699).
CR Allis CD, 2007, CELL, V131, P633, DOI 10.1016/j.cell.2007.10.039
   ANGEL P, 1991, BIOCHIM BIOPHYS ACTA, V1072, P129, DOI 10.1016/0304-419X(91)90011-9
   Calixto Joao B., 2004, Planta Medica, V70, P93, DOI 10.1055/s-2004-815483
   Cardesa A, 2011, VIRCHOWS ARCH, V458, P649, DOI 10.1007/s00428-011-1075-0
   Chinenov Y, 2001, ONCOGENE, V20, P2438, DOI 10.1038/sj.onc.1204385
   Clayton AL, 2003, FEBS LETT, V546, P51, DOI 10.1016/S0014-5793(03)00451-4
   Fischle W, 2005, NATURE, V438, P1116, DOI 10.1038/nature04219
   Jenuwein T, 2001, SCIENCE, V293, P1074, DOI 10.1126/science.1063127
   KARIN M, 1995, J BIOL CHEM, V270, P16483, DOI 10.1074/jbc.270.28.16483
   Keum YS, 2013, ONCOGENE, V32, P444, DOI 10.1038/onc.2012.71
   Kong ANT, 2001, MUTAT RES-FUND MOL M, V480, P231, DOI 10.1016/S0027-5107(01)00182-8
   Kouzarides T, 2007, CELL, V128, P693, DOI 10.1016/j.cell.2007.02.005
   Kundu JK, 2004, MUTAT RES-FUND MOL M, V555, P65, DOI 10.1016/j.mrfmmm.2004.05.019
   Kwon SH, 2011, BIOESSAYS, V33, P280, DOI 10.1002/bies.201000138
   Lomberk G, 2006, NAT CELL BIOL, V8, P407, DOI 10.1038/ncb1383
   Luger K, 1997, NATURE, V389, P251, DOI 10.1038/38444
   MacDonald N, 2005, MOL CELL, V20, P199, DOI 10.1016/j.molcel.2005.08.032
   Nowak SJ, 2004, TRENDS GENET, V20, P214, DOI 10.1016/j.tig.2004.02.007
   Shilatifard A, 2006, ANNU REV BIOCHEM, V75, P243, DOI 10.1146/annurev.biochem.75.103004.142422
   Strahl BD, 2000, NATURE, V403, P41, DOI 10.1038/47412
   Surh YJ, 2005, J NUTR, V135, p2993S, DOI 10.1093/jn/135.12.2993S
   Wang GG, 2007, TRENDS MOL MED, V13, P363, DOI 10.1016/j.molmed.2007.07.003
   Winter S, 2008, CELL CYCLE, V7, P1336, DOI 10.4161/cc.7.10.5946
   Wisdom R, 1999, EXP CELL RES, V253, P180, DOI 10.1006/excr.1999.4685
   Yaffe MB, 2002, FEBS LETT, V513, P53, DOI 10.1016/S0014-5793(01)03288-4
NR 25
TC 3
Z9 4
U1 0
U2 1
PU KOREAN SOC APPLIED PHARMACOLOGY
PI SEOUL
PA RM 805, KOREAN FEDERATION SCIENCE & TECHNOLOGY B/D, 635-4 YEOKSAM-DONG,
   KANGNAM-GU, SEOUL, 135-703, SOUTH KOREA
SN 1976-9148
EI 2005-4483
J9 BIOMOL THER
JI Biomol. Ther.
PD JUL 31
PY 2014
VL 22
IS 4
BP 308
EP 313
DI 10.4062/biomolther.2014.057
PG 6
WC Biochemistry & Molecular Biology; Pharmacology & Pharmacy
WE Science Citation Index Expanded (SCI-EXPANDED)
SC Biochemistry & Molecular Biology; Pharmacology & Pharmacy
GA AM7BV
UT WOS:000340020600007
PM 25143809
OA Green Published, Green Submitted
DA 2022-04-10
ER

PT J
AU Mulder, MPC
   Merkx, R
   Witting, KF
   Hameed, DS
   El Atmioui, D
   Lelieveld, L
   Liebelt, F
   Neefjes, J
   Berlin, I
   Vertegaal, ACO
   Ovaa, H
AF Mulder, Monique P. C.
   Merkx, Remco
   Witting, Katharina F.
   Hameed, Dharjath S.
   El Atmioui, Dris
   Lelieveld, Lindsey
   Liebelt, Frauke
   Neefjes, Jacques
   Berlin, Ilana
   Vertegaal, Alfred C. O.
   Ovaa, Huib
TI Total Chemical Synthesis of sumoylationand SUMO-Based Probes for Profiling the
   Activity of SUMO-Specific Proteases
SO ANGEWANDTE CHEMIE-INTERNATIONAL EDITION
LA English
DT Article
DE activity-based protein profiling; post-translational modification;
   proteolysis; solid-phase peptide synthesis; SUMO
ID UBIQUITIN; DIUBIQUITIN; GLYCINE; FAMILY; CANCER; CHAINS; SENP6
AB sumoylationis a post-translational modifier critical for cell cycle progression and genome stability that plays a role in tumorigenesis, thus rendering SUMO-specific enzymes potential pharmacological target. However, the systematic generation of tools for the activity profiling of SUMO-specific enzymes has proven challenging. We developed a diversifiable synthetic platform for SUMO-based probes by using a direct linear synthesis method, which permits N- and C-terminal labelling to incorporate dyes and reactive warheads, respectively. In this manner, activity-based probes (ABPs) for SUMO-1, SUMO-2, and SUMO-3-specific proteases were generated and validated in cells using gel-based assays and confocal microscopy. We further expanded our toolbox with the synthesis of a K11-linked diSUMO-2 probe to study the proteolytic cleavage of sumoylationchains. Together, these ABPs demonstrate the versatility and specificity of our synthetic sumoylationplatform for invitro and invivo characterization of the sumoylationprotease family.
C1 [Mulder, Monique P. C.; Merkx, Remco; Witting, Katharina F.; Hameed, Dharjath S.; El Atmioui, Dris; Lelieveld, Lindsey; Neefjes, Jacques; Berlin, Ilana; Ovaa, Huib] Netherlands Canc Inst NKI, Div Cell Biol, Plesmanlaan 121, NL-1066 CX Amsterdam, Netherlands.
   [Mulder, Monique P. C.; Witting, Katharina F.; Hameed, Dharjath S.; El Atmioui, Dris; Neefjes, Jacques; Berlin, Ilana; Ovaa, Huib] LUMC, Oncode Inst, Einthovenweg 20, NL-2333 ZC Leiden, Netherlands.
   [Mulder, Monique P. C.; Witting, Katharina F.; Hameed, Dharjath S.; El Atmioui, Dris; Liebelt, Frauke; Neefjes, Jacques; Berlin, Ilana; Vertegaal, Alfred C. O.; Ovaa, Huib] LUMC, Dept Cell & Chem Biol, Einthovenweg 20, NL-2333 ZC Leiden, Netherlands.
   [Merkx, Remco] Med Evaluat Board, Graadt van Roggenweg 500, NL-3531 AH Utrecht, Netherlands.
   [Lelieveld, Lindsey] Leiden Univ, Leiden Inst Chem, Einsteinweg 55, NL-2300 RA Leiden, Netherlands.
RP Mulder, MPC; Ovaa, H (corresponding author), Netherlands Canc Inst NKI, Div Cell Biol, Plesmanlaan 121, NL-1066 CX Amsterdam, Netherlands.; Mulder, MPC; Ovaa, H (corresponding author), LUMC, Oncode Inst, Einthovenweg 20, NL-2333 ZC Leiden, Netherlands.; Mulder, MPC; Ovaa, H (corresponding author), LUMC, Dept Cell & Chem Biol, Einthovenweg 20, NL-2333 ZC Leiden, Netherlands.
EM M.P.C.Mulder@lumc.nl; h.ovaa@lumc.nl
RI Vertegaal, Alfred/ABG-8141-2021; Neefjes, Jacques J.C./H-8780-2017;
   Hameed, Dharjath Ahamed Shahul/AAV-9531-2021; Mulder, Monique Priscilla
   Catharina/AAA-4990-2022; Vertegaal, Alfred CO/Y-3875-2018; ovaa,
   huib/M-2334-2016
OI Vertegaal, Alfred/0000-0002-7989-0493; Neefjes, Jacques
   J.C./0000-0001-6763-2211; Hameed, Dharjath Ahamed
   Shahul/0000-0001-5727-5003; Mulder, Monique Priscilla
   Catharina/0000-0001-5386-7132; Vertegaal, Alfred CO/0000-0002-7989-0493;
   ovaa, huib/0000-0002-0068-054X; Witting, Katharina/0000-0002-9736-0373
FU VICI grant from the Netherlands Organization for Scientific Research
   (N.W.O)
FX We would like to thank Patrick Celie at the NKI protein facility for the
   expression and purification of the catalytic domains of SENP1-8, and
   Jonas Dorr at Utrecht University for help with CD measurements. This
   work was supported by a VICI grant from the Netherlands Organization for
   Scientific Research (N.W.O).
CR Bayer P, 1998, J MOL BIOL, V280, P275, DOI 10.1006/jmbi.1998.1839
   BLAAKMEER J, 1991, INT J PEPT PROT RES, V37, P556
   Boll E, 2015, NAT PROTOC, V10, P269, DOI 10.1038/nprot.2015.013
   Bondalapati S, 2017, CHEM SCI, V8, P4027, DOI 10.1039/c7sc00488e
   Cappadocia L, 2018, CHEM REV, V118, P889, DOI 10.1021/acs.chemrev.6b00737
   de Jong A., 2017, ANGEW CHEM, V129, P13147
   de Jong A, 2017, ANGEW CHEM INT EDIT, V56, P12967, DOI 10.1002/anie.201706738
   Dobrota C, 2012, CHEMBIOCHEM, V13, P80, DOI 10.1002/cbic.201100645
   Ekkebus R, 2013, J AM CHEM SOC, V135, P2867, DOI 10.1021/ja309802n
   Gan-Erdene T, 2003, J BIOL CHEM, V278, P28892, DOI 10.1074/jbc.M302890200
   Geurink PP, 2016, CHEMBIOCHEM, V17, P816, DOI 10.1002/cbic.201600017
   Gong L, 2006, J BIOL CHEM, V281, P15869, DOI 10.1074/jbc.M511658200
   HAACK T, 1992, TETRAHEDRON LETT, V33, P1589, DOI 10.1016/S0040-4039(00)91681-2
   Hameed DS, 2017, BIOCONJUGATE CHEM, V28, P805, DOI 10.1021/acs.bioconjchem.6b00140
   Khoury GA, 2011, SCI REP-UK, V1, DOI 10.1038/srep00090
   Komander D, 2012, ANNU REV BIOCHEM, V81, P203, DOI 10.1146/annurev-biochem-060310-170328
   Lima CD, 2008, J BIOL CHEM, V283, P32045, DOI 10.1074/jbc.M805655200
   Mali SM, 2017, J AM CHEM SOC, V139, P4971, DOI 10.1021/jacs.7b00089
   Melnyk O, 2016, TETRAHEDRON LETT, V57, P4319, DOI 10.1016/j.tetlet.2016.08.035
   Mukhopadhyay D, 2010, J CELL BIOL, V188, P681, DOI 10.1083/jcb.200909008
   Mulder MPC, 2016, NAT CHEM BIOL, V12, P523, DOI 10.1038/nchembio.2084
   Mulder MPC, 2014, CHEMBIOCHEM, V15, P946, DOI 10.1002/cbic.201402012
   Nayak A, 2014, GENOME BIOL, V15, DOI 10.1186/s13059-014-0422-2
   Pao KC, 2016, NAT CHEM BIOL, V12, P324, DOI [10.1038/NCHEMBIO.2045, 10.1038/nchembio.2045]
   Pinto MP, 2012, BBA-MOL CELL RES, V1823, P1958, DOI 10.1016/j.bbamcr.2012.07.010
   Saitoh H, 2000, J BIOL CHEM, V275, P6252, DOI 10.1074/jbc.275.9.6252
   Seeler JS, 2017, NAT REV CANCER, V17, P184, DOI 10.1038/nrc.2016.143
   Shen LN, 2009, BIOCHEM J, V421, P223, DOI 10.1042/BJ20090246
   Sommer S, 2013, BIOORGAN MED CHEM, V21, P2511, DOI 10.1016/j.bmc.2013.02.039
   Tatham MH, 2001, J BIOL CHEM, V276, P35368, DOI 10.1074/jbc.M104214200
   Ward JA, 2016, ACS CHEM BIOL, V11, P3268, DOI 10.1021/acschembio.6b00766
   Weber A, 2017, CELL CHEM BIOL, V24, P1299, DOI 10.1016/j.chembiol.2017.08.006
   Wucherpfennig T.G., 2014, ANGEW CHEM, V126, P12445, DOI [10.1002/ange.201407014, DOI 10.1002/ANGE.201407014]
   Wucherpfennig TG, 2014, ANGEW CHEM INT EDIT, V53, P12248, DOI 10.1002/anie.201407014
NR 34
TC 24
Z9 24
U1 1
U2 23
PU WILEY-V C H VERLAG GMBH
PI WEINHEIM
PA POSTFACH 101161, 69451 WEINHEIM, GERMANY
SN 1433-7851
EI 1521-3773
J9 ANGEW CHEM INT EDIT
JI Angew. Chem.-Int. Edit.
PD JUL 16
PY 2018
VL 57
IS 29
BP 8958
EP 8962
DI 10.1002/anie.201803483
PG 5
WC Chemistry, Multidisciplinary
WE Science Citation Index Expanded (SCI-EXPANDED)
SC Chemistry
GA GM5QO
UT WOS:000438195200027
PM 29771001
OA Green Published, hybrid
DA 2022-04-10
ER

PT J
AU Park, HJ
   Zheng, HY
   Kulkarni, D
   Kerrigan, J
   Pungaliya, P
   Saleem, A
   Rubin, EH
AF Park, Hye-Jin
   Zheng, Haiyan
   Kulkarni, Diptee
   Kerrigan, John
   Pungaliya, Pooja
   Saleem, Ahamed
   Rubin, Eric H.
TI Identification of Phosphorylation Sites of TOPORS and a Role for Serine
   98 in the Regulation of ubiquitinationbut Not sumoylationE3 Ligase Activity
SO BIOCHEMISTRY
LA English
DT Article
ID TOPOISOMERASE-I-BINDING; PARTICLE MESH EWALD; RING FINGER PROTEIN;
   C-CBL; TUMOR-SUPPRESSOR; LOCALIZATION; SPECIFICITY; TYROSINE; MAPK; P53
AB TOPORS is the first example of a protein that possesses both ubiquitinationand sumoylationE3 ligase activity. The ubiquitination activity maps to a conserved RING domain in the N-terminal region of the protein, which is not required for sumoylation activity. Similar to other E3 ligases, it is likely that the ubiquitinationand sumoylation activities of TOPORS are regulated by post-translational modification. Therefore, we employed mass spectrometry to identify post-translational modification of TOPORS. Several putative phosphorylated regions were identified in conserved regions of the protein. We investigated the role of phosphorylation of serine 98, which is adjacent to the RING domain, in both cells and in vitro. Mutation of serine 98 to aspartic acid resulted in an increase in the ubiquitinationligase activity of TOPORS both in cells and in vitro. In addition, this mutation increased the binding of TOPORS to the E2 enzyme UbcH5a both in vitro and in cells. Conversely, a phospho-deficient mutant (S98A) exhibited little change in ubiquitinationligase activity compared to wild-type TOPORS, both in cells and in vitro. Neither of the mutants affected the localization of TOPORS to punctate nuclear regions. In addition, neither mutant affected the sumoylationligase activity of TOPORS in cells or in vitro. Molecular modeling studies support a role for serine 98 in regulating TOPORS-E2 interactions. Our findings indicate that phosphorylation of serine 98 regulates the ubiquitinationbut not the sumoylationligase activity of TOPORS, consistent with a potential binary switch function for TOPORS in protein ubiquitination versus sumoylation.
C1 [Rubin, Eric H.] Univ Med & Dent New Jersey, Robert Wood Johnson Med Sch, Canc Inst New Jersey, Dept Pharmacol, New Brunswick, NJ 08901 USA.
   Univ Med & Dent New Jersey, Robert Wood Johnson Med Sch, Canc Inst New Jersey, Dept Med, New Brunswick, NJ 08901 USA.
RP Rubin, EH (corresponding author), Univ Med & Dent New Jersey, Robert Wood Johnson Med Sch, Canc Inst New Jersey, Dept Pharmacol, 195 Little Albany St, New Brunswick, NJ 08901 USA.
EM eric_rubin@merck.com
FU United States Public Health ServiceUnited States Department of Health &
   Human ServicesUnited States Public Health Service [CA99951]; National
   Cancer InstituteUnited States Department of Health & Human
   ServicesNational Institutes of Health (NIH) - USANIH National Cancer
   Institute (NCI); NATIONAL CANCER INSTITUTEUnited States Department of
   Health & Human ServicesNational Institutes of Health (NIH) - USANIH
   National Cancer Institute (NCI) [R01CA099951] Funding Source: NIH
   RePORTER
FX This work was supported by United States Public Health Service Grant
   CA99951 (E.H.R.) awarded by the National Cancer Institute.
CR BARLOW PN, 1994, J MOL BIOL, V237, P201, DOI 10.1006/jmbi.1994.1222
   Beausoleil SA, 2004, P NATL ACAD SCI USA, V101, P12130, DOI 10.1073/pnas.0404720101
   Beausoleil SA, 2006, NAT BIOTECHNOL, V24, P1285, DOI 10.1038/nbt1240
   BERENDSEN HJC, 1987, J PHYS CHEM-US, V91, P6269, DOI 10.1021/j100308a038
   Bredel M, 2005, CANCER RES, V65, P4088, DOI 10.1158/0008-5472.CAN-04-4229
   Case DA, 2005, J COMPUT CHEM, V26, P1668, DOI 10.1002/jcc.20290
   DARDEN T, 1993, J CHEM PHYS, V98, P10089, DOI 10.1063/1.464397
   DODD RB, 2006, STRUCTURES 2 H UNPUB
   Duan Y, 2003, J COMPUT CHEM, V24, P1999, DOI 10.1002/jcc.10349
   Eletr ZM, 2007, J MOL BIOL, V369, P419, DOI 10.1016/j.jmb.2007.03.026
   ESSMANN U, 1995, J CHEM PHYS, V103, P8577, DOI 10.1063/1.470117
   Freemont PS, 2000, CURR BIOL, V10, pR84, DOI 10.1016/S0960-9822(00)00287-6
   Guan B, 2008, J BIOL CHEM, V283, P4834, DOI 10.1074/jbc.M708630200
   Haluska P, 1999, NUCLEIC ACIDS RES, V27, P2538, DOI 10.1093/nar/27.12.2538
   Hammer E, 2007, FEBS LETT, V581, P5418, DOI 10.1016/j.febslet.2007.10.040
   He HB, 2007, MOL CELL BIOCHEM, V295, P179, DOI 10.1007/s11010-006-9287-3
   Hecker CM, 2006, J BIOL CHEM, V281, P16117, DOI 10.1074/jbc.M512757200
   HUMPHREY W, 1996, J MOL GRAPHICS, V14, P1, DOI DOI 10.1016/0263-7855(96)00018-5
   Jerkic M, 2006, CARDIOVASC RES, V69, P845, DOI 10.1016/j.cardiores.2005.11.020
   Joazeiro CAP, 2000, CELL, V102, P549, DOI 10.1016/S0092-8674(00)00077-5
   Joazeiro CAP, 1999, SCIENCE, V286, P309, DOI 10.1126/science.286.5438.309
   Johnson ES, 2004, ANNU REV BIOCHEM, V73, P355, DOI 10.1146/annurev.biochem.73.011303.074118
   Kannan N, 2004, PROTEIN SCI, V13, P2059, DOI 10.1110/ps.04637904
   Kassenbrock CK, 2004, J BIOL CHEM, V279, P28017, DOI 10.1074/jbc.M404114200
   Kassenbrock CK, 2002, J BIOL CHEM, V277, P24967, DOI 10.1074/jbc.M201026200
   Khurana A, 2006, J BIOL CHEM, V281, P35316, DOI 10.1074/jbc.M606568200
   Levkowitz G, 1999, MOL CELL, V4, P1029, DOI 10.1016/S1097-2765(00)80231-2
   Lin L, 2005, ONCOGENE, V24, P3385, DOI 10.1038/sj.onc.1208554
   Ma CT, 2008, J MOL BIOL, V376, P55, DOI 10.1016/j.jmb.2007.08.029
   Mao DYL, 2008, MOL CELL, V29, P535, DOI 10.1016/j.molcel.2008.02.009
   Marti-Renom MA, 2002, STRUCTURE, V10, P435, DOI 10.1016/S0969-2126(02)00731-1
   Martinez GL, 2000, J ELECTRON MATER, V29, P325, DOI 10.1007/s11664-000-0072-x
   Melchior F, 2002, CELL CYCLE, V1, P243, DOI 10.4161/cc.1.4.131
   MIYAMOTO S, 1992, J COMPUT CHEM, V13, P952, DOI 10.1002/jcc.540130805
   Muller S, 1998, EMBO J, V17, P61, DOI 10.1093/emboj/17.1.61
   Mylonis I, 2006, J BIOL CHEM, V281, P33095, DOI 10.1074/jbc.M605058200
   Oyanagi H, 2004, LUNG CANCER, V46, P21, DOI 10.1016/j.lungcan.2004.03.009
   Pang YP, 2000, PROTEIN SCI, V9, P1857
   Pettersen EF, 2004, J COMPUT CHEM, V25, P1605, DOI 10.1002/jcc.20084
   Rajendra R, 2004, J BIOL CHEM, V279, P36440, DOI 10.1074/jbc.C400300200
   Rasheed ZA, 2002, EXP CELL RES, V277, P152, DOI 10.1006/excr.2002.5550
   Roscic A, 2006, MOL CELL, V24, P77, DOI 10.1016/j.molcel.2006.08.004
   Saleem A, 2004, ONCOGENE, V23, P5293, DOI 10.1038/sj.onc.1207700
   SALI A, 1993, J MOL BIOL, V234, P779, DOI 10.1006/jmbi.1993.1626
   Seol JH, 1999, GENE DEV, V13, P1614, DOI 10.1101/gad.13.12.1614
   Swaminathan G, 2006, J CELL PHYSIOL, V209, P21, DOI 10.1002/jcp.20694
   Weger S, 2005, FEBS LETT, V579, P5007, DOI 10.1016/j.febslet.2005.07.088
   Weger S, 2003, EXP CELL RES, V290, P13, DOI 10.1016/S0014-4827(03)00292-1
   Winkler GS, 2004, J MOL BIOL, V337, P157, DOI 10.1016/j.jmb.2004.01.031
   Yokouchi M, 2001, J BIOL CHEM, V276, P35185, DOI 10.1074/jbc.M102219200
   Zheng N, 2000, CELL, V102, P533, DOI 10.1016/S0092-8674(00)00057-X
NR 51
TC 8
Z9 9
U1 0
U2 0
PU AMER CHEMICAL SOC
PI WASHINGTON
PA 1155 16TH ST, NW, WASHINGTON, DC 20036 USA
SN 0006-2960
J9 BIOCHEMISTRY-US
JI Biochemistry
PD DEC 30
PY 2008
VL 47
IS 52
BP 13887
EP 13896
DI 10.1021/bi801904q
PG 10
WC Biochemistry & Molecular Biology
WE Science Citation Index Expanded (SCI-EXPANDED)
SC Biochemistry & Molecular Biology
GA 388PV
UT WOS:000262032600017
PM 19053840
DA 2022-04-10
ER

PT J
AU Zhang, XB
   Tang, NM
   Hadden, TJ
   Rishi, AK
AF Zhang, Xinbo
   Tang, Naimei
   Hadden, Timothy J.
   Rishi, Arun K.
TI Akt, FoxO and regulation of apoptosis
SO BIOCHIMICA ET BIOPHYSICA ACTA-MOLECULAR CELL RESEARCH
LA English
DT Review
DE PKB/Akt; FoxO; Tumor suppression
ID FORKHEAD TRANSCRIPTION FACTOR; prostate cancer CELLS; BREAST-CANCER;
   GENE-EXPRESSION; DEPENDENT REGULATION; TUMOR SUPPRESSORS;
   DOWN-REGULATION; CYCLIN G2; PROMOTES TUMORIGENESIS; MYELOGENOUS-LEUKEMIA
AB Forkhead box O (FoxO) transcription factor are downstream target of the serine/threonine protein kinase B (PKB)/Akt The Akt kinase regulates processes of cellular proliferation and survival. Phosphorylation of FoxOs by Akt inhibits transcriptional functions of FoxOs and contributes to cell survival, growth and proliferation. Emerging evidence suggests involvement of FoxOs in diverse intracellular signaling pathway with critical roles in a number of physiological as well as pathological conditions including cancer. The FoxO signaling is regulated by their interactions with other intracellular proteins as well as their post-translational modification such as phosphorylation. FoxOs promote cell growth inhibitory and/or apoptosis signaling by either inducing expression of multiple pro-apoptotic members of the Bcl2-family of mitochondria-targeting proteins, stimulating expression of death receptor ligands such as Fas ligand and tumor necrosis factor-related apoptosis-inducing ligand (TRAIL), or enhancing levels of various cyclin-dependent kinase inhibitors (CDKIs). Coupled with their ability to cross-talk with p53. FoxOs represent an important class of tumor suppressors in a variety of cancers. This review summarizes our current understanding of mechanisms by which Akt and FoxOs regulate cell growth and survival that in turn offers opportunities for development of novel strategies to combat cancer. This article is part of a Special Issue entitled: P13K-AKT-FOxO axis in cancer and aging. (C) 2011 Elsevier B.V. All rights reserved.
C1 [Hadden, Timothy J.; Rishi, Arun K.] Wayne State Univ, John A Dingell VA Med Ctr, Detroit, MI 48201 USA.
   [Zhang, Xinbo; Tang, Naimei; Rishi, Arun K.] Wayne State Univ, Karmanos Canc Inst, Detroit, MI 48201 USA.
   [Rishi, Arun K.] Wayne State Univ, Dept Oncol, Detroit, MI 48201 USA.
   [Zhang, Xinbo; Tang, Naimei; Hadden, Timothy J.] Wayne State Univ, Dept Internal Med, Detroit, MI 48201 USA.
RP Rishi, AK (corresponding author), VA Med Ctr, Room B4334,4646 John R, Detroit, MI 48201 USA.
EM Rishia@Karmanos.org
FU Department of Veterans AffairsUS Department of Veterans Affairs
FX Supported by the Department of Veterans Affairs Merit Review grant to
   AKR.
CR Allen KE, 2010, MOL CANCER THER, V9, P3126, DOI 10.1158/1535-7163.MCT-10-0397
   Alvarez B, 2001, NATURE, V413, P744, DOI 10.1038/35099574
   Anderson MJ, 1998, GENOMICS, V47, P187, DOI 10.1006/geno.1997.5122
   Arden KC, 2004, MOL CELL, V14, P416, DOI 10.1016/S1097-2765(04)00213-8
   Bar N, 2010, PLOS ONE, V5, DOI 10.1371/journal.pone.0010859
   Barnett SF, 2005, CURR TOP MED CHEM, V5, P109, DOI 10.2174/1568026053507714
   Barr FG, 2001, ONCOGENE, V20, P5736, DOI 10.1038/sj.onc.1204599
   Bartel DP, 2004, CELL, V116, P281, DOI 10.1016/S0092-8674(04)00045-5
   Belletti B, 2005, CURR MED CHEM, V12, P1589, DOI 10.2174/0929867054367149
   Blake DC, 2010, LUNG CANCER, V67, P37, DOI 10.1016/j.lungcan.2009.03.013
   Borkhardt A, 1997, ONCOGENE, V14, P195, DOI 10.1038/sj.onc.1200814
   Brunet A, 1999, CELL, V96, P857, DOI 10.1016/S0092-8674(00)80595-4
   Brunet A, 2004, SCIENCE, V303, P2011, DOI 10.1126/science.1094637
   Burgering BMT, 2002, TRENDS BIOCHEM SCI, V27, P352, DOI 10.1016/S0968-0004(02)02113-8
   Chapuis N, 2010, BLOOD, V116, P4240, DOI 10.1182/blood-2009-12-260711
   Chiacchiera F, 2010, CELL CYCLE, V9, P1091, DOI 10.4161/cc.9.6.11035
   Chipuk JE, 2009, CELL CYCLE, V8, P2692, DOI 10.4161/cc.8.17.9412
   Choi MG, 2009, J SURG RES, V157, P168, DOI 10.1016/j.jss.2008.06.020
   CHUNZHI Z, 2010, BMC CANC, V12
   Cornforth AN, 2008, ONCOGENE, V27, P4422, DOI 10.1038/onc.2008.80
   Dabrowska A, 2008, J IMMUNOL, V181, P8460, DOI 10.4049/jimmunol.181.12.8460
   Dan HC, 2008, GENE DEV, V22, P1490, DOI 10.1101/gad.1662308
   Dansen TB, 2008, TRENDS CELL BIOL, V18, P421, DOI 10.1016/j.tcb.2008.07.004
   Datta SR, 1997, CELL, V91, P231, DOI 10.1016/S0092-8674(00)80405-5
   DAVIS RJ, 1994, CANCER RES, V54, P2869
   Deng R, 2010, INT J CANCER, V127, P220, DOI 10.1002/ijc.25032
   Di Cosimo S, 2008, EUR J CANCER, V44, P2781, DOI 10.1016/j.ejca.2008.09.026
   Dijkers PF, 2000, MOL CELL BIOL, V20, P9138, DOI 10.1128/MCB.20.24.9138-9148.2000
   Dijkers PF, 2002, J CELL BIOL, V156, P531, DOI 10.1083/jcb.200108084
   Dijkers PF, 2000, CURR BIOL, V10, P1201, DOI 10.1016/S0960-9822(00)00728-4
   DONEHOWER LA, 1992, NATURE, V356, P215, DOI 10.1038/356215a0
   Ernst A, 2010, ONCOGENE, V29, P3411, DOI 10.1038/onc.2010.83
   Essafi A, 2005, ONCOGENE, V24, P2317, DOI 10.1038/sj.onc.1208421
   Filipowicz W, 2008, NAT REV GENET, V9, P102, DOI 10.1038/nrg2290
   Foulstone E, 2005, J PATHOL, V205, P145, DOI 10.1002/path.1712
   Franke TF, 2003, ONCOGENE, V22, P8983, DOI 10.1038/sj.onc.1207115
   Frasor J, 2003, ENDOCRINOLOGY, V144, P4562, DOI 10.1210/en.2003-0567
   Fritz RD, 2010, ONCOGENE, V29, P3575, DOI 10.1038/onc.2010.104
   Fritz RD, 2010, MOL CANCER RES, V8, P395, DOI 10.1158/1541-7786.MCR-09-0296
   Fu Z, 2008, ONCOGENE, V27, P2312, DOI 10.1038/onc.2008.24
   Garcia-Echeverria C, 2008, ONCOGENE, V27, P5511, DOI 10.1038/onc.2008.246
   Gilley J, 2003, J CELL BIOL, V162, P613, DOI 10.1083/jcb.200303026
   Gomez-Gutierrez JG, 2006, CANCER BIOL THER, V5, P875, DOI 10.4161/cbt.5.7.2911
   Gopinath S, 2010, PLOS ONE, V5, DOI 10.1371/journal.pone.0011668
   Greer EL, 2005, ONCOGENE, V24, P7410, DOI 10.1038/sj.onc.1209086
   Griffiths-Jones S, 2004, NUCLEIC ACIDS RES, V32, pD109, DOI 10.1093/nar/gkh023
   Griffiths-Jones S, 2008, NUCLEIC ACIDS RES, V36, pD154, DOI 10.1093/nar/gkm952
   Griffiths-Jones S, 2006, NUCLEIC ACIDS RES, V34, pD140, DOI 10.1093/nar/gkj112
   He L, 2010, SCI SIGNAL, V3, DOI 10.1126/scisignal.3146pe39
   Herzog CR, 2009, ONCOL REP, V22, P837, DOI 10.3892/or_00000507
   Hu MCT, 2004, CELL, V117, P225, DOI 10.1016/S0092-8674(04)00302-2
   Hudes G, 2007, NEW ENGL J MED, V356, P2271, DOI 10.1056/NEJMoa066838
   Huse JT, 2009, GENE DEV, V23, P1327, DOI 10.1101/gad.1777409
   Ihle NT, 2010, MOL ASPECTS MED, V31, P135, DOI 10.1016/j.mam.2010.02.003
   Ihle NT, 2009, MOL CANCER THER, V8, P1, DOI 10.1158/1535-7163.MCT-08-0801
   Ito K, 2009, CURR OPIN GENET DEV, V19, P51, DOI 10.1016/j.gde.2009.01.004
   Ito Y, 2003, ANTICANCER RES, V23, P2335
   JACKS T, 1994, CURR BIOL, V4, P1, DOI 10.1016/S0960-9822(00)00002-6
   Jagani Z, 2008, BBA-REV CANCER, V1785, P63, DOI 10.1016/j.bbcan.2007.10.003
   Jagani Z, 2009, CANCER RES, V69, P6546, DOI 10.1158/0008-5472.CAN-09-0605
   Jin GS, 2004, ACTA MED OKAYAMA, V58, P197
   Kato M, 2009, NAT CELL BIOL, V11, P881, DOI 10.1038/ncb1897
   Kau TR, 2003, CANCER CELL, V4, P463, DOI 10.1016/S1535-6108(03)00303-9
   Keniry M, 2008, ONCOGENE, V27, P5477, DOI 10.1038/onc.2008.248
   Kiechle FL, 2002, CLIN CHIM ACTA, V326, P27, DOI 10.1016/S0009-8981(02)00297-8
   Kikuchi S, 2007, CANCER SCI, V98, P1949, DOI 10.1111/j.1349-7006.2007.00623.x
   Kikuno N, 2007, ONCOGENE, V26, P7647, DOI 10.1038/sj.onc.1210572
   Kim Y, 2004, CANCER RES, V64, P8980, DOI 10.1158/0008-5472.CAN-04-1926
   Kolanus W, 2007, IMMUNOL REV, V218, P102, DOI 10.1111/j.1600-065X.2007.00542.x
   Kondapaka SB, 2003, MOL CANCER THER, V2, P1093
   Konings IRHM, 2009, CURR CANCER DRUG TAR, V9, P439, DOI 10.2174/156800909788166556
   Kops GJPL, 2002, MOL CELL BIOL, V22, P2025, DOI 10.1128/MCB.22.7.2025-2036.2002
   Lam EWF, 2006, BIOCHEM SOC T, V34, P722, DOI 10.1042/BST0340722
   Lee J, 2009, EXP MOL MED, V41, P765, DOI 10.3858/emm.2009.41.11.102
   Levine Arnold J., 2004, Cell, VS116, pS67, DOI 10.1016/S0092-8674(04)00036-4
   Li JS, 2009, CLIN CANCER RES, V15, P3998, DOI 10.1158/1078-0432.CCR-08-3053
   Li PF, 2003, MOL CELL BIOL, V23, P104, DOI 10.1128/MCB.23.1.104-118.2003
   Lim J, 2010, GENE DEV, V24, P1496, DOI 10.1101/gad.1904610
   Liu LH, 2010, LIFE SCI, V86, P192, DOI 10.1016/j.lfs.2009.12.002
   Liu P, 2008, ONCOGENE, V27, P4733, DOI 10.1038/onc.2008.104
   Lomonosova E, 2008, ONCOGENE, V27, pS2, DOI 10.1038/onc.2009.39
   Ma WW, 2009, CA-CANCER J CLIN, V59, P111, DOI 10.3322/caac.20003
   MacFarlane M, 2009, XENOBIOTICA, V39, P616, DOI 10.1080/00498250903137990
   Malumbres M, 2001, NAT REV CANCER, V1, P222, DOI 10.1038/35106065
   Matsuzaki H, 2003, P NATL ACAD SCI USA, V100, P11285, DOI 10.1073/pnas.1934283100
   Medema RH, 2000, NATURE, V404, P782, DOI 10.1038/35008115
   Meng FY, 2007, GASTROENTEROLOGY, V133, P647, DOI 10.1053/j.gastro.2007.05.022
   Mikse OR, 2010, CANCER RES, V70, P6205, DOI 10.1158/0008-5472.CAN-09-4008
   Modur V, 2002, J BIOL CHEM, V277, P47928, DOI 10.1074/jbc.M207509200
   MORGAN DO, 1995, NATURE, V374, P131, DOI 10.1038/374131a0
   Motzer RJ, 2008, LANCET, V372, P449, DOI 10.1016/S0140-6736(08)61039-9
   Nemoto S, 2004, SCIENCE, V306, P2105, DOI 10.1126/science.1101731
   O'Reilly KE, 2006, CANCER RES, V66, P1500, DOI 10.1158/0008-5472.CAN-05-2925
   Paik JH, 2007, CELL, V128, P309, DOI 10.1016/j.cell.2006.12.029
   Pal SK, 2010, EXPERT OPIN INV DRUG, V19, P1355, DOI 10.1517/13543784.2010.520701
   Pandini G, 2003, J BIOL CHEM, V278, P42178, DOI 10.1074/jbc.M304980200
   Park JK, 2009, PANCREAS, V38, pE190, DOI 10.1097/MPA.0b013e3181ba82e1
   Park SJ, 2009, CELL SIGNAL, V21, P1495, DOI 10.1016/j.cellsig.2009.05.008
   Pezzolesi MG, 2008, AM J HUM GENET, V82, P1141, DOI 10.1016/j.ajhg.2008.04.005
   Pollak M, 2008, NAT REV CANCER, V8, P915, DOI 10.1038/nrc2536
   Ramaswamy S, 2002, CANCER CELL, V2, P81, DOI 10.1016/S1535-6108(02)00086-7
   Raymond E, 2004, J CLIN ONCOL, V22, P2336, DOI 10.1200/JCO.2004.08.116
   Ren Y, 2010, BMC CANCER, V10, DOI 10.1186/1471-2407-10-27
   Rishi AK, 2009, PHARMACEUTICAL PERSPECTIVES OF CANCER THERAPEUTICS, P149, DOI 10.1007/978-1-4419-0131-6_5
   Schmidt M, 2002, MOL CELL BIOL, V22, P7842, DOI 10.1128/MCB.22.22.7842-7852.2002
   Seoane J, 2004, CELL, V117, P211, DOI 10.1016/S0092-8674(04)00298-3
   So CW, 2002, MOL CELL BIOL, V22, P6542, DOI 10.1128/MCB.22.18.6542-6552.2002
   Song LB, 2010, J PATHOL, V222, P227, DOI 10.1002/path.2751
   Stahl M, 2002, J IMMUNOL, V168, P5024, DOI 10.4049/jimmunol.168.10.5024
   Sunters A, 2006, CANCER RES, V66, P212, DOI 10.1158/0008-5472.CAN-05-1997
   Sunters A, 2003, J BIOL CHEM, V278, P49795, DOI 10.1074/jbc.M309523200
   Taguchi A, 2008, ANNU REV PHYSIOL, V70, P191, DOI 10.1146/annurev.physiol.70.113006.100533
   Tang TTL, 2003, J BIOL CHEM, V278, P30125, DOI 10.1074/jbc.M302042200
   Tang TTL, 2002, J BIOL CHEM, V277, P14255, DOI 10.1074/jbc.M110901200
   Tothova Z, 2007, CELL STEM CELL, V1, P140, DOI 10.1016/j.stem.2007.07.017
   Tothova Z, 2007, CELL, V128, P325, DOI 10.1016/j.cell.2007.01.003
   Trotman LC, 2006, NATURE, V441, P523, DOI 10.1038/nature04809
   Tuteja G, 2007, CELL, V130, DOI 10.1016/j.cell.2007.09.005
   Urbich C, 2005, FASEB J, V19, P974, DOI 10.1096/fj.04-2727fje
   van der Horst A, 2007, NAT REV MOL CELL BIO, V8, P440, DOI 10.1038/nrm2190
   van Duijn PW, 2010, PROSTATE, V70, P135, DOI 10.1002/pros.21045
   Vink SR, 2007, CANCER TREAT REV, V33, P191, DOI 10.1016/j.ctrv.2006.12.001
   Ward EC, 2008, ENDOCRINOLOGY, V149, P1942, DOI 10.1210/en.2007-0756
   Wesierska-Gadek J, 2011, J CELL PHYSIOL, V226, P341, DOI 10.1002/jcp.22426
   Xiao CC, 2008, NAT IMMUNOL, V9, P405, DOI 10.1038/ni1575
   Yang H, 2008, CANCER RES, V68, P425, DOI 10.1158/0008-5472.CAN-07-2488
   Yang JY, 2008, NAT CELL BIOL, V10, P138, DOI 10.1038/ncb1676
   You H, 2006, J EXP MED, V203, P1657, DOI 10.1084/jem.20060353
   Zeng ZH, 2006, CANCER RES, V66, P3737, DOI 10.1158/0008-5472.CAN-05-1278
   Zhang Haitao, 2005, Cancer Genomics & Proteomics, V2, P97
   Zhang HT, 2010, PROSTATE, V70, P1265, DOI 10.1002/pros.21162
   Zhang SY, 2010, CLIN CANCER RES, V16, P4325, DOI 10.1158/1078-0432.CCR-09-2990
NR 132
TC 643
Z9 668
U1 10
U2 101
PU ELSEVIER SCIENCE BV
PI AMSTERDAM
PA PO BOX 211, 1000 AE AMSTERDAM, NETHERLANDS
SN 0167-4889
EI 0006-3002
J9 BBA-MOL CELL RES
JI Biochim. Biophys. Acta-Mol. Cell Res.
PD NOV
PY 2011
VL 1813
IS 11
SI SI
BP 1978
EP 1986
DI 10.1016/j.bbamcr.2011.03.010
PG 9
WC Biochemistry & Molecular Biology; Cell Biology
WE Science Citation Index Expanded (SCI-EXPANDED)
SC Biochemistry & Molecular Biology; Cell Biology
GA 831YE
UT WOS:000295766200009
PM 21440011
OA Bronze
HC Y
HP N
DA 2022-04-10
ER

PT J
AU Lonn, P
   Moren, A
   Raja, E
   Dahl, M
   Moustakas, A
AF Lonn, Peter
   Moren, Anita
   Raja, Erna
   Dahl, Markus
   Moustakas, Aristidis
TI Regulating the stability of TGF beta receptors and Smads
SO CELL RESEARCH
LA English
DT Review
DE lysosome; phosphorylation; proteasome; Smad; SUMO; TGF beta; ubiquitin
ID UBIQUITIN-DEPENDENT DEGRADATION; TUMOR-SUPPRESSOR SMAD4;
   ANAPHASE-PROMOTING COMPLEX; MAD-RELATED PROTEIN; NEGATIVE REGULATION;
   MEDIATED DEGRADATION; NUCLEAR EXPORT; I RECEPTOR; TRANSCRIPTIONAL
   ACTIVITY; OBSTRUCTIVE NEPHROPATHY
AB Transforming growth factor beta (TGF beta) controls cellular behavior in embryonic and adult tissues. TGF beta binding to serine/threonine kinase receptors on the plasma membrane activates Smad molecules and additional signaling proteins that together regulate gene expression. In this review, mechanisms and models that aim at explaining the coordination between several components of the signaling network downstream of TGF beta are presented. We discuss how the activity and duration of TGF beta receptor/Smad signaling can be regulated by post-translational modification that affect the stability of key proteins in the pathway. We highlight links between these mechanisms and human diseases, such as tissue fibrosis and cancer.
C1 [Lonn, Peter; Moren, Anita; Raja, Erna; Dahl, Markus; Moustakas, Aristidis] Uppsala Univ, Ludwig Inst Canc Res, SE-75124 Uppsala, Sweden.
RP Moustakas, A (corresponding author), Uppsala Univ, Ludwig Inst Canc Res, Box 595 Biomed Ctr, SE-75124 Uppsala, Sweden.
EM aris.moustakas@licr.uu.se
FU Ludwig Institute for Cancer Research; Atlantic Philanthropies/Ludwig
   Institute for Cancer Research Clinical Discovery Program; Swedish Cancer
   SocietySwedish Cancer Society; Swedish Research CouncilSwedish Research
   CouncilEuropean Commission; Marie Curie Research Training Network (RTN)
   "EpiPlastCarcinoma"European Commission; Network of Excellence "ENFIN"
   under the European Union FP6 programEuropean Commission
FX We acknowledge funding by the Ludwig Institute for Cancer Research, the
   Atlantic Philanthropies/Ludwig Institute for Cancer Research Clinical
   Discovery Program, the Swedish Cancer Society, the Swedish Research
   Council, the Marie Curie Research Training Network (RTN)
   "EpiPlastCarcinoma" and the Network of Excellence "ENFIN" under the
   European Union FP6 program. We thank all past and present members of the
   TGF beta signaling group for their contributions to the scientific work
   emanating from our laboratory. A Moustakas wishes to dedicate this
   article to the impact that 10 years of support by the Ludwig Institute
   for Cancer Research and in particular by Carl-Henrik Heldin, a true
   promoter of scientific enthusiasm, had on his scientific evolution.
CR Anumanthan G, 2006, CANCER RES, V66, P10824, DOI 10.1158/0008-5472.CAN-06-1599
   Asano Y, 2004, J CLIN INVEST, V113, P253, DOI 10.1172/JCI200416269
   Bai ST, 2002, J BIOL CHEM, V277, P4176, DOI 10.1074/jbc.M105105200
   Bai YL, 2004, MOL CELL, V15, P825, DOI 10.1016/j.molcel.2004.07.021
   Bierie B, 2006, NAT REV CANCER, V6, P506, DOI 10.1038/nrc1926
   Bonni S, 2001, NAT CELL BIOL, V3, P587, DOI 10.1038/35078562
   Cai Yu, 2006, Chin J Dig Dis, V7, P237, DOI 10.1111/j.1443-9573.2006.00275.x
   Camoretti-Mercado B, 2006, J BIOL CHEM, V281, P20383, DOI 10.1074/jbc.M602748200
   Chang CC, 2005, J BIOL CHEM, V280, P10164, DOI 10.1074/jbc.M409161200
   Chen C, 2007, ONCOGENE, V26, P2386, DOI 10.1038/sj.onc.1210021
   Chen C, 2007, CANCER METAST REV, V26, P587, DOI 10.1007/s10555-007-9091-x
   Chen CS, 2007, INT J CANCER, V121, P80, DOI 10.1002/ijc.22653
   Datta PK, 2000, MOL CELL BIOL, V20, P3157, DOI 10.1128/MCB.20.9.3157-3167.2000
   Di Guglielmo GM, 2003, NAT CELL BIOL, V5, P410, DOI 10.1038/ncb975
   Dumont E, 2003, J BIOL CHEM, V278, P24881, DOI 10.1074/jbc.M212496200
   Dupont S, 2005, CELL, V121, P87, DOI 10.1016/j.cell.2005.01.033
   Ebisawa T, 2001, J BIOL CHEM, V276, P12477, DOI 10.1074/jbc.C100008200
   Eppert K, 1996, CELL, V86, P543, DOI 10.1016/S0092-8674(00)80128-2
   Feng XH, 2005, ANNU REV CELL DEV BI, V21, P659, DOI 10.1146/annurev.cellbio.21.022404.142018
   Fuentealba LC, 2007, CELL, V131, P980, DOI 10.1016/j.cell.2007.09.027
   Fukasawa H, 2004, P NATL ACAD SCI USA, V101, P8687, DOI 10.1073/pnas.0400035101
   Fukuchi M, 2002, CANCER RES, V62, P7162
   Fukuchi M, 2001, MOL BIOL CELL, V12, P1431, DOI 10.1091/mbc.12.5.1431
   Geiss-Friedlander R, 2007, NAT REV MOL CELL BIO, V8, P947, DOI 10.1038/nrm2293
   Glasgow E, 2008, ENDOCR-RELAT CANCER, V15, P59, DOI 10.1677/ERC-07-0168
   Gordon KJ, 2008, BBA-MOL BASIS DIS, V1782, P197, DOI 10.1016/j.bbadis.2008.01.006
   Gronroos E, 2002, MOL CELL, V10, P483, DOI 10.1016/S1097-2765(02)00639-1
   Guo X, 2008, GENE DEV, V22, P106, DOI 10.1101/gad.1590908
   Haider SK, 2006, CANCER RES, V66, P6156, DOI 10.1158/0008-5472.CAN-05-3261
   Hayashi H, 1997, CELL, V89, P1165, DOI 10.1016/S0092-8674(00)80303-7
   He J, 2003, J BIOL CHEM, V278, P30540, DOI 10.1074/jbc.M304016200
   Heldin CH, 2006, DEV CELL, V10, P685, DOI 10.1016/j.devcel.2006.05.006
   Hershko A, 1998, ANNU REV BIOCHEM, V67, P425, DOI 10.1146/annurev.biochem.67.1.425
   Hicke L, 2001, NAT REV MOL CELL BIO, V2, P195, DOI 10.1038/35056583
   Imoto S, 2003, J BIOL CHEM, V278, P34253, DOI 10.1074/jbc.M304961200
   Imoto S, 2008, BIOCHEM BIOPH RES CO, V370, P359, DOI 10.1016/j.bbrc.2008.03.116
   Inamitsu M, 2006, FEBS LETT, V580, P6603, DOI 10.1016/j.febslet.2006.11.008
   Inoue Y, 2004, J INTERF CYTOK RES, V24, P43, DOI 10.1089/107999004772719909
   Itoh S, 1998, J BIOL CHEM, V273, P29195, DOI 10.1074/jbc.273.44.29195
   Itoh S, 2007, CURR OPIN CELL BIOL, V19, P176, DOI 10.1016/j.ceb.2007.02.015
   Izzi L, 2004, ONCOGENE, V23, P2071, DOI 10.1038/sj.onc.1207412
   Izzi L, 2006, NEOPLASIA, V8, P677, DOI 10.1593/neo.06472
   Kang JS, 2008, NAT CELL BIOL, V10, P654, DOI 10.1038/ncb1728
   Kavsak P, 2000, MOL CELL, V6, P1365, DOI 10.1016/S1097-2765(00)00134-9
   Koinuma D, 2003, EMBO J, V22, P6458, DOI 10.1093/emboj/cdg632
   Komuro A, 2004, ONCOGENE, V23, P6914, DOI 10.1038/sj.onc.1207885
   Konikoff CE, 2008, J MOL EVOL, V67, P323, DOI 10.1007/s00239-008-9159-4
   Kowanetz M, 2008, J CELL BIOL, V182, P655, DOI 10.1083/jcb.200804107
   Krakowski AR, 2005, P NATL ACAD SCI USA, V102, P12437, DOI 10.1073/pnas.0504107102
   Kuratomi G, 2005, BIOCHEM J, V386, P461, DOI 10.1042/BJ20040738
   Lallemand F, 2005, J BIOL CHEM, V280, P27645, DOI 10.1074/jbc.M500188200
   Le Roy C, 2005, NAT REV MOL CELL BIO, V6, P112, DOI 10.1038/nrm1571
   Le Scolan E, 2008, CANCER RES, V68, P3277, DOI 10.1158/0008-5472.CAN-07-6793
   Lee PSW, 2003, J BIOL CHEM, V278, P27853, DOI 10.1074/jbc.M301755200
   Levy L, 2007, MOL CELL BIOL, V27, P6068, DOI 10.1128/MCB.00664-07
   Li LY, 2004, MOL CELL BIOL, V24, P856, DOI 10.1128/MCB.24.2.856-864.2004
   Liang M, 2004, MOL CELL BIOL, V24, P7524, DOI 10.1128/MCB.24.17.7524-7537.2004
   Liang M, 2004, J BIOL CHEM, V279, P22857, DOI 10.1074/jbc.M401554200
   Lin X, 2003, J BIOL CHEM, V278, P31043, DOI 10.1074/jbc.C300112200
   Lin X, 2003, J BIOL CHEM, V278, P18714, DOI 10.1074/jbc.M302243200
   Lin X, 2000, J BIOL CHEM, V275, P36818, DOI 10.1074/jbc.C000580200
   Liu FY, 2008, KIDNEY INT, V73, P588, DOI 10.1038/sj.ki.5002713
   Liu FY, 2007, AM J NEPHROL, V27, P176, DOI 10.1159/000100518
   Liu W, 2006, EMBO J, V25, P1646, DOI 10.1038/sj.emboj.7601057
   Lo RS, 1999, NAT CELL BIOL, V1, P472, DOI 10.1038/70258
   Long JY, 2004, BIOCHEM J, V379, P23, DOI 10.1042/BJ20031867
   Long JY, 2003, P NATL ACAD SCI USA, V100, P9791, DOI 10.1073/pnas.1733973100
   Luo KX, 1999, GENE DEV, V13, P2196, DOI 10.1101/gad.13.17.2196
   Massague J, 2008, CELL, V134, P215, DOI 10.1016/j.cell.2008.07.001
   Maurice D, 2001, J BIOL CHEM, V276, P43175, DOI 10.1074/jbc.M105895200
   Mavrakis KJ, 2007, PLOS BIOL, V5, P586, DOI 10.1371/journal.pbio.0050067
   Miyazono K, 2005, CYTOKINE GROWTH F R, V16, P251, DOI 10.1016/j.cytogfr.2005.01.009
   Monteleone G, 2005, GASTROENTEROLOGY, V129, P1420, DOI 10.1053/j.gastro.2005.09.005
   Moren A, 2000, ONCOGENE, V19, P4396, DOI 10.1038/sj.onc.1203798
   Moren A, 2005, J BIOL CHEM, V280, P22115, DOI 10.1074/jbc.M414027200
   Moren A, 2003, J BIOL CHEM, V278, P33571, DOI 10.1074/jbc.M300159200
   Moustakas A, 2005, J CELL SCI, V118, P3573, DOI 10.1242/jcs.02554
   Murakami G, 2003, MOL BIOL CELL, V14, P2809, DOI 10.1091/mbc.E02-07-0441
   Nagano Y, 2007, J BIOL CHEM, V282, P20492, DOI 10.1074/jbc.M701294200
   Nakao A, 1997, NATURE, V389, P631, DOI 10.1038/39369
   Nakao A, 2002, TRENDS MOL MED, V8, P361, DOI 10.1016/S1471-4914(02)02376-6
   Ogunjimi AA, 2005, MOL CELL, V19, P297, DOI 10.1016/j.molcel.2005.06.028
   Ohshima T, 2003, J BIOL CHEM, V278, P50833, DOI 10.1074/jbc.M307533200
   Pardali K, 2007, BBA-REV CANCER, V1775, P21, DOI 10.1016/j.bbcan.2006.06.004
   Ross S, 2008, INT J BIOCHEM CELL B, V40, P383, DOI 10.1016/j.biocel.2007.09.006
   Sahai E, 2007, J CELL BIOL, V176, P35, DOI 10.1083/jcb.200605135
   Sapkota G, 2007, MOL CELL, V25, P441, DOI 10.1016/j.molcel.2007.01.006
   Shen R, 2006, J BIOL CHEM, V281, P3569, DOI 10.1074/jbc.M506761200
   Simonsson M, 2005, J BIOL CHEM, V280, P21797, DOI 10.1074/jbc.M503134200
   Stroschein SL, 2001, GENE DEV, V15, P2822
   Stroschein SL, 1999, SCIENCE, V286, P771, DOI 10.1126/science.286.5440.771
   Su Y, 2007, FASEB J, V21, P682, DOI 10.1096/fj.06-6246com
   Sun Y, 1999, P NATL ACAD SCI USA, V96, P12442, DOI 10.1073/pnas.96.22.12442
   Sun Y, 1999, MOL CELL, V4, P499, DOI 10.1016/S1097-2765(00)80201-4
   Suzuki A, 2008, CANCER SCI, V99, P986, DOI 10.1111/j.1349-7006.2008.00779.x
   Suzuki C, 2002, J BIOL CHEM, V277, P39919, DOI 10.1074/jbc.M201901200
   Tajima Y, 2003, J BIOL CHEM, V278, P10716, DOI 10.1074/jbc.M212663200
   Tan RY, 2008, AM J PHYSIOL-RENAL, V294, pF1076, DOI 10.1152/ajprenal.00323.2007
   Tan RY, 2006, J AM SOC NEPHROL, V17, P2781, DOI 10.1681/ASN.2005101055
   ten Dijke P, 2004, TRENDS BIOCHEM SCI, V29, P265, DOI 10.1016/j.tibs.2004.03.008
   Wan M, 2004, J BIOL CHEM, V279, P14484, DOI 10.1074/jbc.C400005200
   Wan M, 2002, EMBO REP, V3, P171, DOI 10.1093/embo-reports/kvf024
   Wan Y, 2001, MOL CELL, V8, P1027, DOI 10.1016/S1097-2765(01)00382-3
   Wang B, 2008, BIOCHEM BIOPH RES CO, V376, P288, DOI 10.1016/j.bbrc.2008.08.143
   Wang HR, 2003, SCIENCE, V302, P1775, DOI 10.1126/science.1090772
   Wang TW, 2003, FRONT BIOSCI, V8, pD1109, DOI 10.2741/1057
   Welchman RL, 2005, NAT REV MOL CELL BIO, V6, P599, DOI 10.1038/nrm1700
   Wicks SJ, 2005, ONCOGENE, V24, P8080, DOI 10.1038/sj.onc.1208944
   Wiesner S, 2007, CELL, V130, P651, DOI 10.1016/j.cell.2007.06.050
   Wohlfert EA, 2006, J IMMUNOL, V176, P1316, DOI 10.4049/jimmunol.176.3.1316
   Wrightont KH, 2008, P NATL ACAD SCI USA, V105, P9244, DOI 10.1073/pnas.0800163105
   Xin H, 2005, J BIOL CHEM, V280, P20842, DOI 10.1074/jbc.M412275200
   Xu J, 2000, P NATL ACAD SCI USA, V97, P4820, DOI 10.1073/pnas.97.9.4820
   Zhang H, 2004, GENE DEV, V18, P3028, DOI 10.1101/gad.1253004
   Zhang LX, 2004, SCIENCE, V306, P114, DOI 10.1126/science.1100569
   Zhang SP, 2007, MOL CELL BIOL, V27, P4488, DOI 10.1128/MCB.01636-06
   Zhang Y, 2001, P NATL ACAD SCI USA, V98, P974, DOI 10.1073/pnas.98.3.974
   Zhu HT, 1999, NATURE, V400, P687, DOI 10.1038/23293
   Zhu QW, 2007, MOL CELL BIOL, V27, P324, DOI 10.1128/MCB.01394-06
   Zhu QW, 2005, MOL CELL BIOL, V25, P10731, DOI 10.1128/MCB.25.24.10731-10744.2005
NR 120
TC 137
Z9 148
U1 0
U2 13
PU INST BIOCHEMISTRY & CELL BIOLOGY
PI SHANGHAI
PA SIBS, CAS, 319 YUEYANG ROAD, SHANGHAI, 200031, PEOPLES R CHINA
SN 1001-0602
EI 1748-7838
J9 CELL RES
JI Cell Res.
PD JAN
PY 2009
VL 19
IS 1
BP 21
EP 35
DI 10.1038/cr.2008.308
PG 15
WC Cell Biology
WE Science Citation Index Expanded (SCI-EXPANDED)
SC Cell Biology
GA 406ID
UT WOS:000263287300005
PM 19030025
DA 2022-04-10
ER

PT J
AU Bernardi, R
   Pandolfi, PP
AF Bernardi, Rosa
   Pandolfi, Pier Paolo
TI Structure, dynamics and functions of promyelocytic leukaemia nuclear
   bodies
SO NATURE REVIEWS MOLECULAR CELL BIOLOGY
LA English
DT Review
ID MULTIPLE APOPTOTIC PATHWAYS; NEOPLASTIC HUMAN TISSUES; PML
   GROWTH-SUPPRESSOR; FAS-INDUCED APOPTOSIS; CLASS-I EXPRESSION; INDUCED
   DNA-DAMAGE; PROTEIN PML; PREMATURE SENESCENCE; CELLULAR SENESCENCE;
   TUMOR-SUPPRESSOR
AB The promyelocytic leukaemia (PML) tumour suppressor protein epitomizes the PML-nuclear body (PML-NB) and is crucially required for the proper assembly of this macromolecular nuclear structure. Unlike other, more specialized subnuclear structures such as Cajal and Polycomb group bodies, PML-NBs are functionally promiscuous and have been implicated in the regulation of diverse cellular functions. PML-NBs are dynamic structures that favour the sequestration and release of proteins, mediate their post-translational modification and promote specific nuclear events in response to various cellular stresses. Recent data suggest that PML-NBs may be heterogeneous in composition, mobility and function.
C1 Beth Israel Deaconess Med Ctr, Beth Israel Deaconess Canc Ctr, Harvard Med Sch, Dept Med,Canc Genet Program, Boston, MA 02215 USA.
RP Pandolfi, PP (corresponding author), Beth Israel Deaconess Med Ctr, Beth Israel Deaconess Canc Ctr, Harvard Med Sch, Dept Med,Canc Genet Program, Boston, MA 02215 USA.
EM ppandolf@bidmc.harvard.edu
RI bernardi, rosa/B-1650-2013
OI bernardi, rosa/0000-0002-3607-6336
CR Anton LC, 1999, J CELL BIOL, V146, P113, DOI 10.1083/jcb.146.1.113
   Aoto T, 2006, DEV BIOL, V298, P354, DOI 10.1016/j.ydbio.2006.04.450
   Ayaydin F, 2004, MOL BIOL CELL, V15, P5208, DOI 10.1091/mbc.E04-07-0589
   Bardos JI, 2004, BIOESSAYS, V26, P262, DOI 10.1002/bies.20002
   Beech SJ, 2005, EXP CELL RES, V307, P109, DOI 10.1016/j.yexcr.2005.03.012
   Bernardi R, 2004, NAT CELL BIOL, V6, P665, DOI 10.1038/ncb1147
   Bernardi R, 2003, ONCOGENE, V22, P9048, DOI 10.1038/sj.onc.1207106
   Bernardi R, 2006, NATURE, V442, P779, DOI 10.1038/nature05029
   Best JL, 2002, MOL CELL, V10, P843, DOI 10.1016/S1097-2765(02)00699-8
   Bischof O, 2001, J CELL BIOL, V153, P367, DOI 10.1083/jcb.153.2.367
   Bischof O, 2002, EMBO J, V21, P3358, DOI 10.1093/emboj/cdf341
   Boe SO, 2006, J CELL SCI, V119, P3284, DOI 10.1242/jcs.03068
   Boisvert FM, 2000, J CELL BIOL, V148, P283, DOI 10.1083/jcb.148.2.283
   Borden KLB, 2002, MOL CELL BIOL, V22, P5259, DOI 10.1128/MCB.22.15.5259-5269.2002
   Bruno S, 2003, BLOOD, V101, P3514, DOI 10.1182/blood-2002-11-3335
   Buschbeck M, 2007, ONCOGENE, V26, P3415, DOI 10.1038/sj.onc.1210128
   Cabrera CM, 2004, TISSUE ANTIGENS, V63, P446, DOI 10.1111/j.0001-2815.2004.00204.x
   Carbone R, 2002, ONCOGENE, V21, P1633, DOI 10.1038/sj.onc.1205227
   CHANG KS, 1995, BLOOD, V85, P3646, DOI 10.1182/blood.V85.12.3646.bloodjournal85123646
   Chang SK, 2002, MOL CELLS, V14, P130
   Chen LY, 2003, MOL CELL BIOL, V23, P7108, DOI 10.1128/MCB.23.20.7108-7121.2003
   Ching RW, 2005, J CELL SCI, V118, P847, DOI 10.1242/jcs.01700
   Cho YM, 1998, INT J MOL MED, V1, P717
   Choi YH, 2006, P NATL ACAD SCI USA, V103, P18715, DOI 10.1073/pnas.0604800103
   Condemine W, 2006, CANCER RES, V66, P6192, DOI 10.1158/0008-5472.CAN-05-3792
   Conlan LA, 2004, ONCOGENE, V23, P307, DOI 10.1038/sj.onc.1207119
   Costa A, 2006, CANCER RES, V66, P8918, DOI 10.1158/0008-5472.CAN-06-0273
   Croxton R, 2006, CANCER RES, V66, P9026, DOI 10.1158/0008-5472.CAN-06-1047
   de Stanchina E, 2004, MOL CELL, V13, P523, DOI 10.1016/S1097-2765(04)00062-0
   Dellaire G, 2006, J CELL SCI, V119, P1026, DOI 10.1242/jcs.02816
   Dellaire G, 2006, J CELL SCI, V119, P1034, DOI 10.1242/jcs.02817
   Dellaire G, 2004, BIOESSAYS, V26, P963, DOI 10.1002/bies.20089
   Dellaire G, 2003, NUCLEIC ACIDS RES, V31, P328, DOI 10.1093/nar/gkg018
   Dellaire G, 2006, J CELL BIOL, V175, P55, DOI 10.1083/jcb.200604009
   Dror N, 2007, J BIOL CHEM, V282, P5633, DOI 10.1074/jbc.M607825200
   Dunham MA, 2000, NAT GENET, V26, P447, DOI 10.1038/82586
   Duprez E, 1999, J CELL SCI, V112, P381
   Eskiw CH, 2004, J BIOL CHEM, V279, P9577, DOI 10.1074/jbc.M312580200
   Eskiw CH, 2003, J CELL SCI, V116, P4455, DOI 10.1242/jcs.00758
   Everett RD, 1999, J CELL SCI, V112, P3443
   Everett RD, 1999, J CELL SCI, V112, P4581
   Everett RD, 2007, BIOCHIMIE, V89, P819, DOI 10.1016/j.biochi.2007.01.004
   Fasching CL, 2005, CANCER RES, V65, P2722, DOI 10.1158/0008-5472.CAN-04-2881
   Ferbeyre G, 2000, GENE DEV, V14, P2015
   Ferbeyre G, 2002, LEUKEMIA, V16, P1918, DOI 10.1038/sj.leu.2402722
   FLENGHI L, 1995, BLOOD, V85, P1871, DOI 10.1182/blood.V85.7.1871.bloodjournal8571871
   Fogal V, 2000, EMBO J, V19, P6185, DOI 10.1093/emboj/19.22.6185
   Fu CH, 2005, ONCOGENE, V24, P5401, DOI 10.1038/sj.onc.1208714
   Gambacorta M, 1996, AM J PATHOL, V149, P2023
   Grande MA, 1996, J CELL BIOCHEM, V63, P280, DOI 10.1002/(SICI)1097-4644(19961201)63:3<280::AID-JCB3>3.0.CO;2-T
   Gurrieri C, 2004, JNCI-J NATL CANCER I, V96, P269, DOI 10.1093/jnci/djh043
   Hayakawa F, 2004, CANCER CELL, V5, P389, DOI 10.1016/S1535-6108(04)00082-0
   Henson JD, 2005, CLIN CANCER RES, V11, P217
   Heun P, 2007, CURR OPIN CELL BIOL, V19, P350, DOI 10.1016/j.ceb.2007.04.014
   Ishov AM, 2004, J CELL SCI, V117, P3807, DOI 10.1242/jcs.01230
   Ishov AM, 1999, J CELL BIOL, V147, P221, DOI 10.1083/jcb.147.2.221
   Janderovd-Rossmeislova L, 2007, J STRUCT BIOL, V159, P56, DOI 10.1016/j.jsb.2007.02.008
   Jensen K, 2001, ONCOGENE, V20, P7223, DOI 10.1038/sj.onc.1204765
   Jiang WQ, 2007, ONCOGENE, V26, P4635, DOI 10.1038/sj.onc.1210260
   Jiang WQ, 1997, CELL GROWTH DIFFER, V8, P513
   Kamitani T, 1998, J BIOL CHEM, V273, P3117, DOI 10.1074/jbc.273.6.3117
   Kiesslich A, 2002, J STRUCT BIOL, V140, P167, DOI 10.1016/S1047-8477(02)00571-3
   KOKEN MHM, 1995, ONCOGENE, V10, P1315
   Kumar P, 2007, NAT CELL BIOL, V9, P45, DOI 10.1038/ncb1516
   Kurki S, 2003, J CELL SCI, V116, P3917, DOI 10.1242/jcs.00714
   Lallemand-Breitenbach V, 2001, J EXP MED, V193, P1361, DOI 10.1084/jem.193.12.1361
   Larghero J, 1999, LEUKEMIA, V13, P1295, DOI 10.1038/sj.leu.2401464
   Lin DY, 2006, MOL CELL, V24, P341, DOI 10.1016/j.molcel.2006.10.019
   Lin HK, 2004, NATURE, V431, P205, DOI 10.1038/nature02783
   Luciani JJ, 2006, J CELL SCI, V119, P2518, DOI 10.1242/jcs.02965
   Maul GG, 1995, J CELL BIOCHEM, V59, P498, DOI 10.1002/jcb.240590410
   Meinecke I, 2007, P NATL ACAD SCI USA, V104, P5073, DOI 10.1073/pnas.0608773104
   Melnick A, 1999, BLOOD, V93, P3167, DOI 10.1182/blood.V93.10.3167.410k44_3167_3215
   Milovic-Holm K, 2007, EMBO J, V26, P391, DOI 10.1038/sj.emboj.7601504
   Mukhopadhyay D, 2006, J CELL BIOL, V174, P939, DOI 10.1083/jcb.200510103
   Muntoni A, 2005, HUM MOL GENET, V14, pR191, DOI 10.1093/hmg/ddi266
   Muratani M, 2002, NAT CELL BIOL, V4, P106, DOI 10.1038/ncb740
   Nacerddine K, 2005, DEV CELL, V9, P769, DOI 10.1016/j.devcel.2005.10.007
   Narita M, 2003, CELL, V113, P703, DOI 10.1016/S0092-8674(03)00401-X
   Nefkens I, 2003, J CELL SCI, V116, P513, DOI 10.1242/jcs.00253
   Nguyen LA, 2005, BLOOD, V105, P292, DOI 10.1182/blood-2004-03-1185
   Nisole S, 2005, NAT REV MICROBIOL, V3, P799, DOI 10.1038/nrmicro1248
   Pearson M, 2000, NATURE, V406, P207, DOI 10.1038/35018127
   Potts PR, 2007, NAT STRUCT MOL BIOL, V14, P581, DOI 10.1038/nsmb1259
   Quimby BB, 2006, ONCOGENE, V25, P2999, DOI 10.1038/sj.onc.1209335
   Rockel TD, 2002, J STRUCT BIOL, V140, P189
   Saitoh N, 2006, EXP CELL RES, V312, P1418, DOI 10.1016/j.yexcr.2006.01.013
   Salomoni P, 2005, BLOOD, V105, P3686, DOI 10.1182/blood-2004-09-3782
   Salomoni P, 2002, CELL, V108, P165, DOI 10.1016/S0092-8674(02)00626-8
   Salomoni P, 2006, TRENDS CELL BIOL, V16, P97, DOI 10.1016/j.tcb.2005.12.002
   Scaglioni PP, 2006, CELL, V126, P269, DOI 10.1016/j.cell.2006.05.041
   Seeler JS, 2003, NAT REV MOL CELL BIO, V4, P690, DOI 10.1038/nrm1200
   Seeler JS, 1998, P NATL ACAD SCI USA, V95, P7316, DOI 10.1073/pnas.95.13.7316
   Seker H, 2003, ONCOGENE, V22, P1620, DOI 10.1038/sj.onc.1206140
   Shen TH, 2006, MOL CELL, V24, P331, DOI 10.1016/j.molcel.2006.09.013
   Shiels C, 2001, J CELL SCI, V114, P3705
   Stadler M, 1995, ONCOGENE, V11, P2565
   Sternsdorf T, 1997, J CELL BIOL, V139, P1621, DOI 10.1083/jcb.139.7.1621
   STUURMAN N, 1992, J CELL SCI, V101, P773
   Sun YJ, 2003, GENOMICS, V82, P250, DOI 10.1016/S0888-7543(03)00075-2
   Takahashi Y, 2004, ONCOGENE, V23, P2819, DOI 10.1038/sj.onc.1207533
   Tashiro S, 2004, MOL CELL BIOL, V24, P3473, DOI 10.1128/MCB.24.8.3473-3484.2004
   TERRIS B, 1995, CANCER RES, V55, P1590
   Torii S, 1999, EMBO J, V18, P6037, DOI 10.1093/emboj/18.21.6037
   Trotman LC, 2006, NATURE, V441, P523, DOI 10.1038/nature04809
   Tsukamoto T, 2000, NAT CELL BIOL, V2, P871, DOI 10.1038/35046510
   Wang J, 2004, J CELL BIOL, V164, P515, DOI 10.1083/jcb.200305142
   Wang XW, 2001, J BIOL CHEM, V276, P32948, DOI 10.1074/jbc.M103298200
   Wang ZG, 1998, NAT GENET, V20, P266, DOI 10.1038/3073
   Wiesmeijer K, 2002, J STRUCT BIOL, V140, P180, DOI 10.1016/S1047-8477(02)00529-4
   Xu ZX, 2005, MOL CELL, V17, P721, DOI 10.1016/j.molcel.2005.02.014
   Xu ZX, 2003, MOL CELL BIOL, V23, P4247, DOI 10.1128/MCB.23.12.4247-4256.2003
   Yang ST, 2006, J BIOL CHEM, V281, P26645, DOI 10.1074/jbc.M604391200
   Yang ST, 2002, NAT CELL BIOL, V4, P865, DOI 10.1038/ncb869
   Ye XF, 2007, MOL CELL BIOL, V27, P2452, DOI 10.1128/MCB.01592-06
   Yeager TR, 1999, CANCER RES, V59, P4175
   Yoshida H, 2007, MOL CELL BIOL, V27, P5819, DOI 10.1128/MCB.02422-06
   Zhang Huiming, 2003, Cancer Immun, V3, P2
   Zhang RG, 2005, DEV CELL, V8, P19, DOI 10.1016/j.devcel.2004.10.019
   Zhong S, 2000, NAT CELL BIOL, V2, pE85, DOI 10.1038/35010583
   Zhong S, 2000, J EXP MED, V191, P631, DOI 10.1084/jem.191.4.631
   Zhong S, 2000, BLOOD, V95, P2748, DOI 10.1182/blood.V95.9.2748.009k31a_2748_2752
   Zong S, 1999, ONCOGENE, V18, P7941, DOI 10.1038/sj.onc.1203367
NR 123
TC 663
Z9 691
U1 8
U2 51
PU NATURE PUBLISHING GROUP
PI LONDON
PA MACMILLAN BUILDING, 4 CRINAN ST, LONDON N1 9XW, ENGLAND
SN 1471-0072
EI 1471-0080
J9 NAT REV MOL CELL BIO
JI Nat. Rev. Mol. Cell Biol.
PD DEC
PY 2007
VL 8
IS 12
BP 1006
EP 1016
DI 10.1038/nrm2277
PG 11
WC Cell Biology
WE Science Citation Index Expanded (SCI-EXPANDED)
SC Cell Biology
GA 234OO
UT WOS:000251173600013
PM 17928811
DA 2022-04-10
ER

PT J
AU Dani, N
   Barbosa, AJM
   Del Rio, A
   Di Girolamo, M
AF Dani, Nadia
   Barbosa, Armenio Jorge Moura
   Del Rio, Alberto
   Di Girolamo, Maria
TI ADP-Ribosylated Proteins as Old and New Drug target for Anticancer
   Therapy: The Example of ARF6
SO CURRENT PHARMACEUTICAL DESIGN
LA English
DT Article
DE ADP-ribosyltransferase; ARTD; ARTC; post-translational modification;
   mono-ADP-ribosylation; poly-ADP-ribosylpolymerase; PARP;
   NAD-glycohydrolase; NAD; ARF6; protein-protein docking
ID NUCLEOTIDE-BINDING PROTEINS; RIBOSE GLYCOHYDROLASE PARG; ELONGATION
   FACTOR-II; POLY(ADP-RIBOSE) POLYMERASE; CHOLERA-TOXIN; STRUCTURAL BASIS;
   PLASMA-MEMBRANE; BREAST-CANCER; BREFELDIN-A; SIGNALING PATHWAY
AB post-translational modification of cellular proteins by mono-or poly-ADP-ribosylation are associated with numerous cellular processes. ADP-ribosylation reactions are important in the nucleus, and in mitochondrial activity, stress response signaling, intracellular trafficking, and cell senescence and apoptosis decisions. These reversible reactions add ADP-ribose to target proteins via specific enzymes to form the ADP-ribosylated protein; the cleaveage of this covalent bond is performed via hydrolases. Deficiencies in these enzymatic activities lead to cell death or tumor formation, thus defining their functional roles and impact on human disease. Unlike mono-ADP-ribosyltransferases, poly-ADP-ribose polymerases (PARPs) have been at the frontline of drug discovery since the 1980s. PARP1 is a valuable therapeutic target, with a central role in responses to DNA damage. With mono-ADP-ribosylation now linked to human diseases, such as inflammation, diabetes, neurodegeneration and cancer metastasis, novel and equally important functions of mono-ADP-ribosylation in cell signaling pathway can now be defined. Recently, we reported mono-ADP-ribosylation of ADP-ribosylation factor 6 (ARF6), a small G-protein of the Ras superfamily. In addition to its involvement in actin remodeling, plasma membrane reorganization and vesicular transport, ARF6 contributes to cancer progression through activation of cell motility and invasion. Consequently, targeting this modification will counteract the pro-invasive effects of ARF6, providing innovative anti-tumor therapy. This review summarizes our present knowledge of the enzymes and target involved in ADP-ribosylation reactions, and describes in silico approaches to visualize their site of interaction and to identify the precise site for ADP-ribosylation. This should ultimately improve pharmacological strategies to enhance both anti-tumor efficacy and treatment of a number of inflammatory and neurodegenerative disorders.
C1 [Dani, Nadia; Di Girolamo, Maria] Consorzio Mario Negri Sud, Lab G Prot Mediated Signalling, I-66030 Chieti, Italy.
   [Barbosa, Armenio Jorge Moura; Del Rio, Alberto] Univ Bologna, Dept Expt Pathol Alma Mater Studiorum, BioChemoInformat Lab, I-40126 Bologna, Italy.
   [Dani, Nadia] Bioclarma Srl, I-10126 Turin, Italy.
RP Di Girolamo, M (corresponding author), Consorzio Mario Negri Sud, Lab G Prot Mediated Signalling, Via Nazl 8-A, I-66030 Chieti, Italy.
EM mdigirolamo@negrisud.it
RI Moura Barbosa, Arménio/O-2456-2015; Del Rio, Alberto/F-5230-2010;
   Barbosa, Arménio Moura/AAO-1899-2020
OI Moura Barbosa, Arménio/0000-0002-9756-4958; Del Rio,
   Alberto/0000-0002-1890-6797; Barbosa, Arménio Moura/0000-0002-9756-4958
FU Banca Popolare di Lanciano e Sulmona; Italian Association for Cancer
   Research (AIRC)Fondazione AIRC per la ricerca sul cancro [6266]
FX This paper is dedicated to the memory of Nicoletta Schips. We thank
   Elena Fontana for preparation of Figures and Christopher Paul Berrie for
   editorial assistance. We acknowledge the financial support of the Banca
   Popolare di Lanciano e Sulmona and the Italian Association for Cancer
   Research (AIRC), Emilia Romagna Start-up grant 6266.
CR Aktories K, 2011, FEBS J, V278, P4526, DOI 10.1111/j.1742-4658.2011.08113.x
   Ame JC, 2004, BIOESSAYS, V26, P882, DOI 10.1002/bies.20085
   Andreoli F, 2013, CURR PHARM DESIGN, V19, P578, DOI 10.2174/138161213804581918
   [Anonymous], 2011, SCHROD SUIT 2011 PRO
   [Anonymous], 2011, SCHROD SUIT 2011 PRO
   Apweiler R, 2012, NUCLEIC ACIDS RES, V40, pD71, DOI 10.1093/nar/gkr981
   Barbosa AJM, 2012, CURR TOP MED CHEM, V12, P866
   Bazan JF, 1997, ADV EXP MED BIOL, V419, P99
   Bellocchi D, 2005, BIOORGAN MED CHEM, V13, P1151, DOI 10.1016/j.bmc.2004.11.024
   Berman HM, 2000, NUCLEIC ACIDS RES, V28, P235, DOI 10.1093/nar/28.1.235
   Boehler C, 2011, CELL CYCLE, V10, P1023, DOI 10.4161/cc.10.7.15169
   Bruzzone S, 2013, CURR PHARM DESIGN, V19, P614, DOI 10.2174/138161213804581954
   Caporuscio F, 2011, J MED CHEM, V54, P4006, DOI 10.1021/jm2000689
   CASSEL D, 1978, P NATL ACAD SCI USA, V75, P2669, DOI 10.1073/pnas.75.6.2669
   Cerbinskaite A, 2012, CANCER TREAT REV, V38, P89, DOI 10.1016/j.ctrv.2011.04.015
   Chang P, 2005, NAT CELL BIOL, V7, P1133, DOI 10.1038/ncb1322
   Chen YB, 1997, P NATL ACAD SCI USA, V94, P2711, DOI 10.1073/pnas.94.6.2711
   Citarelli M, 2010, BMC EVOL BIOL, V10, DOI 10.1186/1471-2148-10-308
   Claing A, 2004, BIOCHEM CELL BIOL, V82, P610, DOI 10.1139/O04-113
   Corda D, 2003, EMBO J, V22, P1953, DOI 10.1093/emboj/cdg209
   Corda Daniela, 2002, Sci STKE, V2002, ppe53, DOI 10.1126/stke.2002.163.pe53
   Costantino G, 2001, J MED CHEM, V44, P3786, DOI 10.1021/jm010116l
   Cousins KR, 2011, J AM CHEM SOC, V133, P8388, DOI 10.1021/ja204075s
   Curtin NJ, 2012, DRUG DISCOV TODAY, pe51
   D'Souza-Schorey C, 1998, J CELL BIOL, V140, P603, DOI 10.1083/jcb.140.3.603
   D'Souza-Schorey C, 2006, NAT REV MOL CELL BIO, V7, P347, DOI 10.1038/nrm1910
   Dani N, 2011, J BIOL CHEM, V286, P5995, DOI 10.1074/jbc.M110.112466
   Dania N, 2009, P NATL ACAD SCI USA, V106, P4243, DOI 10.1073/pnas.0900066106
   Del Rio A, 2011, J CHEMINFORMATICS
   DEMATTEIS MA, 1994, P NATL ACAD SCI USA, V91, P1114, DOI 10.1073/pnas.91.3.1114
   Deveze-Alvarez M, 2001, MICROBIOL-SGM, V147, P2579, DOI 10.1099/00221287-147-9-2579
   Di Girolamo M, 2005, FEBS J, V272, P4565, DOI 10.1111/j.1742-4658.2005.04876.x
   Di Girolamo M, 2009, MONO ADP RIBOSYLATIO
   Di Paola S, 2012, PLOS ONE IN PRESS
   DIGIROLAMO M, 1995, P NATL ACAD SCI USA, V92, P7065, DOI 10.1073/pnas.92.15.7065
   Dolle C, 2010, CELL MOL LIFE SCI, V67, P433, DOI 10.1007/s00018-009-0190-4
   DOMENIGHINI M, 1994, MOL MICROBIOL, V14, P41, DOI 10.1111/j.1365-2958.1994.tb01265.x
   Donaldson JG, 2003, J BIOL CHEM, V278, P41573, DOI 10.1074/jbc.R300026200
   Du LN, 2003, J BIOL CHEM, V278, P18426, DOI 10.1074/jbc.M301295200
   Du XL, 2003, J CLIN INVEST, V112, P1049, DOI 10.1172/JCI200318127
   Dudek J, 2009, CELL MOL LIFE SCI, V66, P1556, DOI 10.1007/s00018-009-8745-y
   Fathers C, 2012, CELL CYCLE, V11
   Fauzee NJS, 2012, PATHOL ONCOL RES, V18, P191, DOI 10.1007/s12253-011-9428-1
   FENDRICK JL, 1992, EUR J BIOCHEM, V205, P25, DOI 10.1111/j.1432-1033.1992.tb16748.x
   FENDRICK JL, 1989, P NATL ACAD SCI USA, V86, P554, DOI 10.1073/pnas.86.2.554
   Ferraris DV, 2010, J MED CHEM, V53, P4561, DOI 10.1021/jm100012m
   Finch KE, 2012, ACS CHEM BIOL, V7, P563, DOI 10.1021/cb200506t
   Frye RA, 2000, BIOCHEM BIOPH RES CO, V273, P793, DOI 10.1006/bbrc.2000.3000
   Gandhi VB, 2010, BIOORG MED CHEM LETT, V20, P1023, DOI 10.1016/j.bmcl.2009.12.042
   Gillingham AK, 2007, ANNU REV CELL DEV BI, V23, P579, DOI 10.1146/annurev.cellbio.23.090506.123209
   Glowacki G, 2002, PROTEIN SCI, V11, P1657, DOI 10.1110/ps.0200602
   Goenka S, 2006, P NATL ACAD SCI USA, V103, P4210, DOI 10.1073/pnas.0506981103
   Goldberg J, 1999, CELL, V96, P893, DOI 10.1016/S0092-8674(00)80598-X
   Goldberg J, 1998, CELL, V95, P237, DOI 10.1016/S0092-8674(00)81754-7
   Guha M, 2011, NAT BIOTECHNOL, V29, P373, DOI 10.1038/nbt0511-373
   Haigis MC, 2006, CELL, V126, P941, DOI 10.1016/j.cell.2006.06.057
   Hakme A, 2008, EMBO REP, V9, P1094, DOI 10.1038/embor.2008.191
   Hanai S, 2004, P NATL ACAD SCI USA, V101, P82, DOI 10.1073/pnas.2237114100
   Hashimoto S, 2004, P NATL ACAD SCI USA, V101, P6647, DOI 10.1073/pnas.0401753101
   Herrero-Yraola A, 2001, EMBO J, V20, P2404, DOI 10.1093/emboj/20.10.2404
   Honda A, 1999, CELL, V99, P521, DOI 10.1016/S0092-8674(00)81540-8
   Hosaka M, 1996, J BIOCHEM-TOKYO, V120, P813
   Hottiger MO, 2010, TRENDS BIOCHEM SCI, V35, P208, DOI 10.1016/j.tibs.2009.12.003
   Jagtap P, 2005, NAT REV DRUG DISCOV, V4, P421, DOI 10.1038/nrd1718
   Kanai M, 2003, MOL CELL BIOL, V23, P2451, DOI 10.1128/MCB.23.7.2451-2462.2003
   Kato J, 2011, CANCER RES, V71, P5327, DOI 10.1158/0008-5472.CAN-10-0733
   Kim SW, 2003, J BIOL CHEM, V278, P2661, DOI 10.1074/jbc.M205819200
   Kleine H, 2008, MOL CELL, V32, P57, DOI 10.1016/j.molcel.2008.08.009
   Knizhnik A V, 2011, Mol Biol (Mosk), V45, P307
   KRUEGER KM, 1995, CLIN MICROBIOL REV, V8, P34, DOI 10.1128/CMR.8.1.34
   Laitusis AL, 1999, J BIOL CHEM, V274, P486, DOI 10.1074/jbc.274.1.486
   LEDFORD BE, 1994, MOL CELL BIOCHEM, V138, P141, DOI 10.1007/BF00928456
   LENO GH, 1989, EUR J BIOCHEM, V186, P205, DOI 10.1111/j.1432-1033.1989.tb15196.x
   Leung M, 2011, MOL MED, V17, P854, DOI 10.2119/molmed.2010.00240
   Liszt G, 2005, J BIOL CHEM, V280, P21313, DOI 10.1074/jbc.M413296200
   Lodhi IJ, 2001, ARCH BIOCHEM BIOPHYS, V387, P66, DOI 10.1006/abbi.2000.2215
   Lupi R, 2000, J BIOL CHEM, V275, P9418, DOI 10.1074/jbc.275.13.9418
   Lupi R, 2002, BIOCH J, P30
   Maattanen P, 2010, SEMIN CELL DEV BIOL
   Macia E, 2004, J CELL SCI, V117, P2389, DOI 10.1242/jcs.01090
   Menetrey J, 2000, NAT STRUCT BIOL, V7, P466
   Min W, 2009, FRONT BIOSCI-LANDMRK, V14, P1619, DOI 10.2741/3329
   Miwa M, 2007, CANCER SCI, V98, P1528, DOI 10.1111/j.1349-7006.2007.00567.x
   MOSS J, 1991, MOL MICROBIOL, V5, P2621, DOI 10.1111/j.1365-2958.1991.tb01971.x
   MOSS J, 1994, METHOD ENZYMOL, V237, P44
   Moss J, 1998, J BIOL CHEM, V273, P21431, DOI 10.1074/jbc.273.34.21431
   Mueller-Dieckmann C, 2002, J MOL BIOL, V322, P687, DOI 10.1016/S0022-2836(02)00818-5
   Muralidharan-Chari V, 2009, CURR BIOL, V19, P1875, DOI 10.1016/j.cub.2009.09.059
   Muralidharan-Chari V, 2009, CANCER RES, V69, P2201, DOI 10.1158/0008-5472.CAN-08-1301
   Nachury MV, 2001, CELL, V104, P95, DOI 10.1016/S0092-8674(01)00194-5
   Narwal M, 2012, J MED CHEM, V55, P1360, DOI 10.1021/jm201510p
   O'Neal CJ, 2005, SCIENCE, V309, P1093, DOI 10.1126/science.1113398
   O'Shaughnessy J, 2011, NEW ENGL J MED, V364, P205, DOI 10.1056/NEJMoa1011418
   Ohno K, 2011, J MOL MODEL, V17, P383, DOI 10.1007/s00894-010-0728-2
   Okazaki IJ, 1999, ANNU REV NUTR, V19, P485, DOI 10.1146/annurev.nutr.19.1.485
   Okazaki IJ, 1998, J BIOL CHEM, V273, P23617, DOI 10.1074/jbc.273.37.23617
   Paone G, 2002, P NATL ACAD SCI USA, V99, P8231, DOI 10.1073/pnas.122238899
   Pasqualato S, 2001, EMBO REP, V2, P234, DOI 10.1093/embo-reports/kve043
   Pfaffenbach KT, 2010, CURR OPIN CELL BIOL
   Plummer R, 2008, CLIN CANCER RES, V14, P7917, DOI 10.1158/1078-0432.CCR-08-1223
   Radhakrishna H, 1996, J CELL BIOL, V134, P935, DOI 10.1083/jcb.134.4.935
   Ritter H, 2003, BIOCHEMISTRY-US, V42, P10155, DOI 10.1021/bi034625w
   Sabe H, 2003, J BIOCHEM, V134, P485, DOI 10.1093/jb/mvg181
   Sabe H, 2009, TRAFFIC, V10, P982, DOI 10.1111/j.1600-0854.2009.00917.x
   Sanders MP, 2012, J CHEM INF MODEL
   Seman M, 2004, CURR MED CHEM, V11, P857, DOI 10.2174/0929867043455611
   Seman M, 2003, IMMUNITY, V19, P571, DOI 10.1016/S1074-7613(03)00266-8
   Slade D, 2011, NATURE, V477, P616, DOI 10.1038/nature10404
   Stilla A, 2011, EUR J CELL BIOL, V90, P665, DOI 10.1016/j.ejcb.2011.03.007
   Tague SE, 2004, P NATL ACAD SCI USA, V101, P9671, DOI 10.1073/pnas.0403531101
   Tanner KG, 2000, P NATL ACAD SCI USA, V97, P14178, DOI 10.1073/pnas.250422697
   Tentori L, 2005, PHARMACOL RES, V52, P25, DOI 10.1016/j.phrs.2005.02.010
   TERASHIMA M, 1995, EUR J BIOCHEM, V231, P242, DOI 10.1111/j.1432-1033.1995.0242f.x
   Terashima M, 1999, BIOCHEM MOL BIOL INT, V47, P615
   Tovchigrechko A, 2005, PROTEINS, V60, P296, DOI 10.1002/prot.20573
   Tovchigrechko A, 2006, NUCLEIC ACIDS RES, V34, pW310, DOI 10.1093/nar/gkl206
   TSAI SC, 1992, P NATL ACAD SCI USA, V89, P9272, DOI 10.1073/pnas.89.19.9272
   TSUCHIYA M, 1991, J BIOL CHEM, V266, P2772
   Tsuyama S, 1999, INT J BIOCHEM CELL B, V31, P601, DOI 10.1016/S1357-2725(99)00007-2
   Virag L, 2002, PHARMACOL REV, V54, P375, DOI 10.1124/pr.54.3.375
   Wahlberg E, 2012, NAT BIOTECHNOL, V30, P283, DOI 10.1038/nbt.2121
   Weigert R, 1997, J BIOL CHEM, V272, P14200, DOI 10.1074/jbc.272.22.14200
   WELSH CF, 1994, MOL CELL BIOCHEM, V138, P157, DOI 10.1007/BF00928458
   WHITNEY JA, 1995, CELL, V83, P703
   Yang CZ, 1998, J BIOL CHEM, V273, P4006, DOI 10.1074/jbc.273.7.4006
   Yu M, 2005, ONCOGENE, V24, P1982, DOI 10.1038/sj.onc.1208410
   ZOLKIEWSKA A, 1993, J BIOL CHEM, V268, P25273
NR 127
TC 17
Z9 19
U1 0
U2 16
PU BENTHAM SCIENCE PUBL LTD
PI SHARJAH
PA EXECUTIVE STE Y-2, PO BOX 7917, SAIF ZONE, 1200 BR SHARJAH, U ARAB
   EMIRATES
SN 1381-6128
EI 1873-4286
J9 CURR PHARM DESIGN
JI Curr. Pharm. Design
PD FEB
PY 2013
VL 19
IS 4
BP 624
EP 633
DI 10.2174/138161213804581882
PG 10
WC Pharmacology & Pharmacy
WE Science Citation Index Expanded (SCI-EXPANDED)
SC Pharmacology & Pharmacy
GA 110MS
UT WOS:000316448200005
PM 23016858
DA 2022-04-10
ER

PT S
AU Lee, JS
   Choi, HJ
   Baek, SH
AF Lee, Jason S.
   Choi, Hee June
   Baek, Sung Hee
BE Wilson, V
TI Sumoylation and Its Contribution to Cancer
SO sumoylationREGULATION OF CELLULAR PROCESSES, 2ND EDITION
SE Advances in Experimental Medicine and Biology
LA English
DT Article; Book Chapter
DE SUMO; Sumoylation; Cancer; Metastasis; Ubc9; PIAS1; SENP; PML; TEL; p53;
   Reptin; Pontin; I.Ba; NEMO
ID NF-KAPPA-B; ACUTE PROMYELOCYTIC LEUKEMIA; NUCLEAR-BODY FORMATION;
   CHROMATIN-REMODELING COMPLEX; PUTATIVE TUMOR-SUPPRESSOR; CONJUGATING
   ENZYME UBC9; SUMO-1 MODIFICATION; COVALENT MODIFICATION; TRANSCRIPTIONAL
   ACTIVITY; DEPENDENT ACTIVATION
AB post-translational modification play an important role in regulating protein activity by altering their functions. Sumoylation is a highly dynamic process which is tightly regulated by a fine balance between conjugating and deconjugating enzyme activities. It affects intracellular localization and their interaction with their binding partners, thereby changing gene expression. Consequently, these changes in turn affect signaling mechanisms that regulate many cellular functions, such as cell growth, proliferation, apoptosis, DNA repair, and cell survival. It is becoming apparent that deregulation in the sumoylationpathway contributes to oncogenic transformation by affecting sumoylation/desumoylation of many oncoproteins and tumor suppressors. Loss of balance between sumoylation and desumoylation has been reported in a number of studies in a variety of disease types including cancer. This chapter summarizes the mechanisms and functions of the deregulated sumoylationpathway affecting oncogenes and tumor suppressor genes.
C1 [Lee, Jason S.; Choi, Hee June; Baek, Sung Hee] Seoul Natl Univ, Dept Biol Sci, Seoul 151742, South Korea.
RP Baek, SH (corresponding author), Seoul Natl Univ, Dept Biol Sci, Seoul 151742, South Korea.
EM sbaek@snu.ac.kr
CR Anckar J, 2007, BIOCHEM SOC T, V35, P1409, DOI 10.1042/BST0351409
   Baek SH, 2002, CELL, V110, P55, DOI 10.1016/S0092-8674(02)00809-7
   Bernardi R, 2007, NAT REV MOL CELL BIO, V8, P1006, DOI 10.1038/nrm2277
   Bischof O, 2007, CELL CYCLE, V6, P677, DOI 10.4161/cc.6.6.4021
   Bischof O, 2006, MOL CELL, V22, P783, DOI 10.1016/j.molcel.2006.05.016
   Bode AM, 2004, NAT REV CANCER, V4, P793, DOI 10.1038/nrc1455
   Boggio R, 2004, MOL CELL, V16, P549, DOI 10.1016/j.molcel.2004.11.007
   Bossis G, 2005, MOL CELL BIOL, V25, P6964, DOI 10.1128/MCB.25.16.6964-6979.2005
   Bossis G, 2006, MOL CELL, V21, P349, DOI 10.1016/j.molcel.2005.12.019
   Brooks CL, 2006, MOL CELL, V21, P307, DOI 10.1016/j.molcel.2006.01.020
   Buschmann T, 2000, CELL, V101, P753, DOI 10.1016/S0092-8674(00)80887-9
   Carbia-Nagashima A, 2007, CELL, V131, P309, DOI 10.1016/j.cell.2007.07.044
   Chakrabarti SR, 2000, P NATL ACAD SCI USA, V97, P13281, DOI 10.1073/pnas.240315897
   Chakrabarti SR, 1999, P NATL ACAD SCI USA, V96, P7467, DOI 10.1073/pnas.96.13.7467
   Chen LH, 2003, ONCOGENE, V22, P5348, DOI 10.1038/sj.onc.1206851
   Cheng JK, 2006, NEOPLASIA, V8, P667, DOI 10.1593/neo.06445
   Cheng Z, 2008, ONCOGENE, V27, P931, DOI 10.1038/sj.onc.1210710
   Dai MS, 2006, NEOPLASIA, V8, P630, DOI 10.1593/neo.06334
   Dawlaty MM, 2008, CELL, V133, P103, DOI 10.1016/j.cell.2008.01.045
   Depaux A, 2007, ONCOGENE, V26, P6665, DOI 10.1038/sj.onc.1210486
   Desterro JMP, 1998, MOL CELL, V2, P233, DOI 10.1016/S1097-2765(00)80133-1
   Duprez E, 1999, J CELL SCI, V112, P381
   Faus H, 2006, BIOMED PHARMACOTHER, V60, P520, DOI 10.1016/j.biopha.2006.07.082
   Fenrick R, 2000, MOL CELL BIOL, V20, P5828, DOI 10.1128/MCB.20.16.5828-5839.2000
   Fogal V, 2000, EMBO J, V19, P6185, DOI 10.1093/emboj/19.22.6185
   Gambacorta M, 1996, AM J PATHOL, V149, P2023
   Geiss-Friedlander R, 2007, NAT REV MOL CELL BIO, V8, P947, DOI 10.1038/nrm2293
   Geletu M, 2007, BLOOD, V110, P3301, DOI 10.1182/blood-2007-01-071035
   Ghosh S, 2002, CELL, V109, pS81, DOI 10.1016/S0092-8674(02)00703-1
   Golub TR, 1997, CURR TOP MICROBIOL, V220, P67
   Gostissa M, 1999, EMBO J, V18, P6462, DOI 10.1093/emboj/18.22.6462
   Gregoire S, 2006, J BIOL CHEM, V281, P4423, DOI 10.1074/jbc.M509471200
   Gresko E, 2005, BIOCHEM BIOPH RES CO, V329, P1293, DOI 10.1016/j.bbrc.2005.02.113
   Gutierrez GJ, 2006, TRENDS BIOCHEM SCI, V31, P324, DOI 10.1016/j.tibs.2006.04.001
   Hardeland U, 2002, EMBO J, V21, P1456, DOI 10.1093/emboj/21.6.1456
   Hietakangas V, 2006, P NATL ACAD SCI USA, V103, P45, DOI 10.1073/pnas.0503698102
   Hilgarth RS, 2003, BIOCHEM BIOPH RES CO, V303, P196, DOI 10.1016/S0006-291X(03)00312-7
   Hirvonen-Santti SJ, 2003, EUR UROL, V44, P742, DOI 10.1016/S0302-2838(03)00382-8
   Hoege C, 2002, NATURE, V419, P135, DOI 10.1038/nature00991
   Huang TT, 2003, CELL, V115, P565, DOI 10.1016/S0092-8674(03)00895-X
   Ihara M, 2005, MOL CELL BIOL, V25, P3506, DOI 10.1128/MCB.25.9.3506-3518.2005
   Ishov AM, 1999, J CELL BIOL, V147, P221, DOI 10.1083/jcb.147.2.221
   Jacques C, 2005, J CLIN ENDOCR METAB, V90, P2314, DOI 10.1210/jc.2004-1337
   Jang MS, 2002, BIOCHEM BIOPH RES CO, V295, P495, DOI 10.1016/S0006-291X(02)00699-X
   Johnson ES, 2004, ANNU REV BIOCHEM, V73, P355, DOI 10.1146/annurev.biochem.73.011303.074118
   Kamitani T, 1998, J BIOL CHEM, V273, P26675, DOI 10.1074/jbc.273.41.26675
   Karin M, 2006, NATURE, V441, P431, DOI 10.1038/nature04870
   Kim JH, 2005, NATURE, V434, P921, DOI 10.1038/nature03452
   Kim JH, 2007, P NATL ACAD SCI USA, V104, P20793, DOI 10.1073/pnas.0710343105
   Kim JH, 2006, NAT CELL BIOL, V8, P631, DOI 10.1038/ncb1415
   Kim YH, 1999, P NATL ACAD SCI USA, V96, P12350, DOI 10.1073/pnas.96.22.12350
   Knipscheer P, 2008, MOL CELL, V31, P371, DOI 10.1016/j.molcel.2008.05.022
   KOKEN MHM, 1995, ONCOGENE, V10, P1315
   Kurepa J, 2003, J BIOL CHEM, V278, P6862, DOI 10.1074/jbc.M209694200
   Kwek SSS, 2001, ONCOGENE, V20, P2587, DOI 10.1038/sj.onc.1204362
   Lallemand-Breitenbach V, 2005, NAT REV CANCER, V5, P821, DOI 10.1038/nrc1719
   Lallemand-Breitenbach V, 2001, J EXP MED, V193, P1361, DOI 10.1084/jem.193.12.1361
   Ledl A, 2005, ONCOGENE, V24, P3810, DOI 10.1038/sj.onc.1208539
   Lee HE, 2007, CANCER LETT, V247, P103, DOI 10.1016/j.canlet.2006.03.034
   Lee JS, 2004, GASTROENTEROLOGY, V127, pS51, DOI 10.1053/j.gastro.2004.09.015
   Lee Y, 2007, J CEREBR BLOOD F MET, V27, P950, DOI 10.1038/sj.jcbfm.9600395
   Lee YK, 2007, J BIOL CHEM, V282, P1595, DOI 10.1074/jbc.M606306200
   Lehembre F, 2001, ONCOGENE, V20, P1, DOI 10.1038/sj.onc.1204063
   Li H, 2000, MOL CELL BIOL, V20, P1784, DOI 10.1128/MCB.20.5.1784-1796.2000
   Li J, 2001, J BIOL CHEM, V276, P18579, DOI 10.1074/jbc.M100846200
   Lin DY, 2006, MOL CELL, V24, P341, DOI 10.1016/j.molcel.2006.10.019
   Lin JY, 2004, FEBS LETT, V573, P15, DOI 10.1016/j.febslet.2004.07.059
   Liu B, 2007, CELL, V129, P903, DOI 10.1016/j.cell.2007.03.056
   Mabb AM, 2007, CELL MOL LIFE SCI, V64, P1979, DOI 10.1007/s00018-007-7005-2
   Mao Y, 2000, P NATL ACAD SCI USA, V97, P4046, DOI 10.1073/pnas.080536597
   McDoniels-Silvers AL, 2002, CLIN CANCER RES, V8, P1127
   Meinecke I, 2007, P NATL ACAD SCI USA, V104, P5073, DOI 10.1073/pnas.0608773104
   Minty A, 2000, J BIOL CHEM, V275, P36316, DOI 10.1074/jbc.M004293200
   Mo YY, 2005, ONCOGENE, V24, P2677, DOI 10.1038/sj.onc.1208210
   Mo YY, 2004, CANCER RES, V64, P2793, DOI 10.1158/0008-5472.CAN-03-2410
   Mo YY, 2002, J BIOL CHEM, V277, P2958, DOI 10.1074/jbc.M108263200
   Moilanen AM, 1998, MOL CELL BIOL, V18, P5128, DOI 10.1128/MCB.18.9.5128
   Moschos SJ, 2006, J MOL HISTOL, V37, P309, DOI 10.1007/s10735-006-9030-0
   Mullen JR, 2001, GENETICS, V157, P103
   Muller S, 2000, J BIOL CHEM, V275, P13321, DOI 10.1074/jbc.275.18.13321
   Muller S, 1998, EMBO J, V17, P61, DOI 10.1093/emboj/17.1.61
   Negorev D, 2001, ONCOGENE, V20, P7234, DOI 10.1038/sj.onc.1204764
   Nelson V, 2001, APOPTOSIS, V6, P221, DOI 10.1023/A:1011392811628
   Park J, 2005, MOL CELL BIOL, V25, P8202, DOI 10.1128/MCB.25.18.8202-8214.2005
   Paul Robert H., 2007, Journal of Integrative Neuroscience, V6, P191, DOI 10.1142/S0219635207001386
   Pearson M, 2000, NATURE, V406, P207, DOI 10.1038/35018127
   Pero R, 2001, AM J PATHOL, V159, P1225, DOI 10.1016/S0002-9440(10)62508-4
   Poukka H, 2000, P NATL ACAD SCI USA, V97, P14145, DOI 10.1073/pnas.97.26.14145
   Prudden J, 2007, EMBO J, V26, P4089, DOI 10.1038/sj.emboj.7601838
   Qu J, 2007, PLOS ONE, V2, DOI 10.1371/journal.pone.0001085
   Rizos H, 2005, CELL CYCLE, V4, P597, DOI 10.4161/cc.4.4.1588
   Rodriguez MS, 1999, EMBO J, V18, P6455, DOI 10.1093/emboj/18.22.6455
   Rodriguez MS, 2001, J BIOL CHEM, V276, P12654, DOI 10.1074/jbc.M009476200
   Roscic A, 2006, MOL CELL, V24, P77, DOI 10.1016/j.molcel.2006.08.004
   Rowley JD, 1999, SEMIN HEMATOL, V36, P59
   Saitoh H, 2000, J BIOL CHEM, V275, P6252, DOI 10.1074/jbc.275.9.6252
   Schmidt D, 2002, P NATL ACAD SCI USA, V99, P2872, DOI 10.1073/pnas.052559499
   Shalizi A, 2006, SCIENCE, V311, P1012, DOI 10.1126/science.1122513
   Shen TH, 2006, MOL CELL, V24, P331, DOI 10.1016/j.molcel.2006.09.013
   Shen ZX, 2004, P NATL ACAD SCI USA, V101, P5328, DOI 10.1073/pnas.0400053101
   Shinbo Y, 2006, CELL DEATH DIFFER, V13, P96, DOI 10.1038/sj.cdd.4401704
   Stankovic-Valentin N, 2007, MOL CELL BIOL, V27, P2661, DOI 10.1128/MCB.01098-06
   Sternsdorf T, 1999, J BIOL CHEM, V274, P12555, DOI 10.1074/jbc.274.18.12555
   Sternsdorf T, 1997, J CELL BIOL, V139, P1621, DOI 10.1083/jcb.139.7.1621
   Swaminathan S, 2004, J CELL BIOL, V164, P965, DOI 10.1083/jcb.200309126
   Tagawa H, 2002, GENE CHROMOSOME CANC, V34, P175, DOI 10.1002/gcc.10057
   Takahashi Y, 2003, J BIOCHEM, V133, P415, DOI 10.1093/jb/mvg054
   Ueda M, 2003, BRIT J HAEMATOL, V123, P288, DOI 10.1046/j.1365-2141.2003.04601.x
   Ulrich HD, 2007, BIOCHEM SOC T, V35, P1385, DOI 10.1042/BST0351385
   Uzunova K, 2007, J BIOL CHEM, V282, P34167, DOI 10.1074/jbc.M706505200
   Van Rompaey L., 1999, Neoplasia (New York), V1, P526
   Van Rompaey L, 2000, ONCOGENE, V19, P5244, DOI 10.1038/sj.onc.1203899
   Veltman IM, 2005, HUM MOL GENET, V14, P1955, DOI 10.1093/hmg/ddi200
   Villalva C, 2002, BRIT J HAEMATOL, V118, P791, DOI 10.1046/j.1365-2141.2002.03671.x
   Wang LM, 2004, ONCOL REP, V11, P1319
   Wood LD, 2003, P NATL ACAD SCI USA, V100, P3257, DOI 10.1073/pnas.0637114100
   Yamamoto H, 2003, EMBO J, V22, P2047, DOI 10.1093/emboj/cdg204
   Yang SH, 2003, MOL CELL, V12, P63, DOI 10.1016/S1097-2765(03)00265-X
   Yang SH, 2006, MOL CELL, V22, P477, DOI 10.1016/j.molcel.2006.03.037
   Zhang CY, 2006, DNA REPAIR, V5, P336, DOI 10.1016/j.dnarep.2005.10.010
   Zhang P, 2000, INT J CANCER, V85, P599, DOI 10.1002/(SICI)1097-0215(20000301)85:5<599::AID-IJC1>3.3.CO;2-R
   Zhao X, 2005, MOL CELL BIOL, V25, P8456, DOI 10.1128/MCB.25.19.8456-8464.2005
   Zhong S, 2000, BLOOD, V95, P2748, DOI 10.1182/blood.V95.9.2748.009k31a_2748_2752
   Zhu J, 2002, NAT REV CANCER, V2, P705, DOI 10.1038/nrc887
   Zhu J, 1997, P NATL ACAD SCI USA, V94, P3978, DOI 10.1073/pnas.94.8.3978
NR 125
TC 20
Z9 22
U1 0
U2 15
PU SPRINGER INTERNATIONAL PUBLISHING AG
PI CHAM
PA GEWERBESTRASSE 11, CHAM, CH-6330, SWITZERLAND
SN 0065-2598
EI 2214-8019
BN 978-3-319-50044-7; 978-3-319-50043-0
J9 ADV EXP MED BIOL
JI Adv.Exp.Med.Biol.
PY 2017
VL 963
BP 283
EP 298
DI 10.1007/978-3-319-50044-7_17
D2 10.1007/978-3-319-50044-7
PG 16
WC Cell Biology; Medicine, Research & Experimental
WE Book Citation Index – Science (BKCI-S); Science Citation Index Expanded (SCI-EXPANDED)
SC Cell Biology; Research & Experimental Medicine
GA BI3RG
UT WOS:000411389900017
PM 28197919
DA 2022-04-10
ER

PT J
AU Selby, TL
   Biel, N
   Varn, M
   Patel, S
   Patel, A
   Hilding, L
   Ray, A
   Ross, T
   Cramblet, WT
   Moss, CR
   Lowrey, AJ
   Bentz, GL
AF Selby, Thomas L.
   Biel, Natalie
   Varn, Matthew
   Patel, Sheetal
   Patel, Akash
   Hilding, Leslie
   Ray, Ashley
   Ross, Tabithia
   Cramblet, Wyatt T.
   Moss, C. Randall
   Lowrey, Angela J.
   Bentz, Gretchen L.
TI The Epstein-Barr Virus Oncoprotein, LMP1, Regulates the Function of
   SENP2, a SUMO-protease
SO SCIENTIFIC REPORTS
LA English
DT Article
ID CONJUGATING ENZYME UBC9; GENE-EXPRESSION; UBIQUITIN; E1; SUMOYLATION;
   ACTIVATION; CANCER; PROTEINS; RTA; COACTIVATION
AB Epstein-Barr virus (EBV) latent membrane protein-1 (LMP1) activates numerous signal transduction pathways using its C-terminal activating regions. We reported that LMP1 increased global levels of sumoylated proteins, which aided the oncogenic nature of LMP1. Because increased protein sumoylation is detected in numerous cancers, we wanted to elucidate additional mechanisms by which LMP1 modulates the sumoylation machinery. Results indicated that SUMO-protease activity decreased in a LMP1-dependent manner, so we hypothesized that LMP1 inhibits SUMO-protease activity, resulting in reduced de-sumoylation of cellular proteins, which contributes to the detected accumulation of sumoylated proteins in EBV-positive lymphomas. Focusing on SENP2, findings revealed that LMP1 expression corresponded with increased sumoylation of SENP2 at K48 and K447 in a CTAR-dependent manner. Interestingly, independent of LMP1-induced sumoylation of SENP2, LMP1 also decreased SENP2 activity, decreased SENP2 turnover, and altered the localization of SENP2, which led us to investigate if LMP1 regulated the biology of SENP2 by a different post-translational modification, specifically ubiquitination. Data showed that expression of LMP1 inhibited the ubiquitination of SENP2, and inhibition of ubiquitination was sufficient to mimic LMP1-induced changes in SENP2 activity and trafficking. Together, these findings suggest that LMP1 modulates different post-translational modification of SENP2 in order to modulate its biology and identify a third member of the sumoylation machinery that is manipulated by LMP1 during latent EBV infections, which can affect oncogenesis.
C1 [Selby, Thomas L.; Biel, Natalie; Varn, Matthew; Patel, Sheetal; Patel, Akash; Hilding, Leslie; Ray, Ashley; Ross, Tabithia; Cramblet, Wyatt T.; Moss, C. Randall; Lowrey, Angela J.; Bentz, Gretchen L.] Mercer Univ, Sch Med, Div Biomed Sci, Macon, GA 31207 USA.
RP Bentz, GL (corresponding author), Mercer Univ, Sch Med, Div Biomed Sci, Macon, GA 31207 USA.
EM bentz_GL@mercer.edu
OI Patel, Sheetal/0000-0002-9748-7593; Biel, Natalie/0000-0002-1021-2934
FU NCIUnited States Department of Health & Human ServicesNational
   Institutes of Health (NIH) - USANIH National Cancer Institute (NCI)
   [CA160786]; NATIONAL CANCER INSTITUTEUnited States Department of Health
   & Human ServicesNational Institutes of Health (NIH) - USANIH National
   Cancer Institute (NCI) [R00CA160786] Funding Source: NIH RePORTER
FX GB was supported by a grant from NCI (CA160786).
CR Adamson AL, 2005, BIOCHEM BIOPH RES CO, V336, P22, DOI 10.1016/j.bbrc.2005.08.036
   Adamson AL, 2001, J VIROL, V75, P2388, DOI 10.1128/JVI.75.5.2388-2399.2001
   Alarcon-Vargas D, 2002, CANCER BIOL THER, V1, P237, DOI 10.4161/cbt.74
   Andres G, 2001, J BIOL CHEM, V276, P780, DOI 10.1074/jbc.M006844200
   Bailey D, 2004, J BIOL CHEM, V279, P692, DOI 10.1074/jbc.M306195200
   Bentz GL, 2015, J VIROL, V89, P7465, DOI 10.1128/JVI.00711-15
   Bentz GL, 2014, VIROLOGY, V448, P293, DOI 10.1016/j.virol.2013.10.018
   Bentz GL, 2012, J VIROL, V86, P12251, DOI 10.1128/JVI.01407-12
   Bentz GL, 2011, J VIROL, V85, P10144, DOI 10.1128/JVI.05035-11
   Bernier-Villamor V, 2002, CELL, V108, P345, DOI 10.1016/S0092-8674(02)00630-X
   Boutell C, 2002, J VIROL, V76, P841, DOI 10.1128/JVI.76.2.841-850.2002
   CALENDER A, 1987, P NATL ACAD SCI USA, V84, P8060, DOI 10.1073/pnas.84.22.8060
   CALENDER A, 1990, INT J CANCER, V46, P658, DOI 10.1002/ijc.2910460418
   Castoralova M, 2012, BIOTECHNIQUES, V53, P1, DOI 10.2144/000113925
   Chang LK, 2008, J MOL BIOL, V379, P231, DOI 10.1016/j.jmb.2008.04.011
   Chang LK, 2004, J BIOL CHEM, V279, P38803, DOI 10.1074/jbc.M405470200
   Chen C, 2014, IMMUNOLOGY, V142, P307, DOI 10.1111/imm.12255
   Cherney BW, 1998, BLOOD, V91, P2491, DOI 10.1182/blood.V91.7.2491.2491_2491_2500
   Domingues P, 2015, CELL REP, V13, P1467, DOI 10.1016/j.celrep.2015.10.001
   Duan XY, 2009, ANTI-CANCER AGENT ME, V9, P51, DOI 10.2174/187152009787047716
   Gires O, 1999, EMBO J, V18, P3064, DOI 10.1093/emboj/18.11.3064
   Hagemeier SR, 2010, J VIROL, V84, P4383, DOI 10.1128/JVI.02369-09
   Hickey CM, 2012, NAT REV MOL CELL BIO, V13, P755, DOI 10.1038/nrm3478
   Hille A, 2002, J GEN VIROL, V83, P1037, DOI 10.1099/0022-1317-83-5-1037
   Itahana Y, 2006, MOL CELL BIOL, V26, P4675, DOI 10.1128/MCB.01830-05
   Jin JP, 2007, NATURE, V447, P1135, DOI 10.1038/nature05902
   Johnson ES, 2004, ANNU REV BIOCHEM, V73, P355, DOI 10.1146/annurev.biochem.73.011303.074118
   KANE EM, 1993, J VIROL, V67, P2689, DOI 10.1128/JVI.67.5.2689-2698.1993
   Katayama A, 2007, INT J ONCOL, V31, P517
   Kerscher O, 2007, EMBO REP, V8, P550, DOI 10.1038/sj.embor.7400980
   Kerscher O, 2006, ANNU REV CELL DEV BI, V22, P159, DOI 10.1146/annurev.cellbio.22.010605.093503
   Kieser A., 2008, 13 BIENN C INT ASS R
   Kotaja N, 2002, MOL CELL BIOL, V22, P5222, DOI 10.1128/MCB.22.14.5222-5234.2002
   Kroetz Mary B, 2005, Yale J Biol Med, V78, P197
   Kumar A, 2015, COMPUT STRUCT BIOTEC, V13, P204, DOI 10.1016/j.csbj.2015.03.001
   Li HP, 2003, J BIOMED SCI, V10, P490, DOI 10.1159/000072376
   Liebelt F, 2016, AM J PHYSIOL-CELL PH, V311, pC284, DOI 10.1152/ajpcell.00091.2016
   Lin J, 2002, J VIROL, V76, P232, DOI 10.1128/JVI.76.1.232-242.2002
   Liu ST, 2006, VIRUS RES, V119, P163, DOI 10.1016/j.virusres.2006.01.004
   Lowrey AJ, 2017, CELL COMMUN SIGNAL, V15, DOI 10.1186/s12964-017-0183-0
   Madu IG, 2015, SCI REP-UK, V5, DOI 10.1038/srep17808
   Miller WE, 1997, J VIROL, V71, P586, DOI 10.1128/JVI.71.1.586-594.1997
   Mo YY, 2005, EXPERT OPIN THER TAR, V9, P1203, DOI 10.1517/14728222.9.6.1203
   Pagano Joseph S., 2009, P217, DOI 10.1007/978-0-387-68945-6_10
   Pagano JS, 2004, SEMIN CANCER BIOL, V14, P453, DOI 10.1016/j.semcancer.2004.06.009
   Pal S, 2011, VIRUS RES, V158, P12, DOI 10.1016/j.virusres.2011.02.017
   Pelzer C, 2010, SUBCELL BIOCHEM, V54, P238, DOI 10.1007/978-1-4419-6676-6_19
   Pichler A, 2002, CELL, V108, P109, DOI 10.1016/S0092-8674(01)00633-X
   Reverter D, 2004, STRUCTURE, V12, P1519, DOI 10.1016/j.str.2004.05.023
   Rosendorff A, 2004, J VIROL, V78, P367, DOI 10.1128/JVI.78.1.367-377.2004
   Salahuddin S., 2019, SCI REPORTS
   Salahuddin S, 2019, SCI REP-UK, V9, DOI 10.1038/s41598-018-36312-4
   Schulman BA, 2009, NAT REV MOL CELL BIO, V10, P319, DOI 10.1038/nrm2673
   Shen LN, 2006, NAT STRUCT MOL BIOL, V13, P1069, DOI 10.1038/nsmb1172
   Sloan E, 2015, PLOS PATHOG, V11, DOI 10.1371/journal.ppat.1005059
   Stewart MJ, 2005, J VIROL, V79, P2979, DOI 10.1128/JVI.79.5.2979-2987.2005
   Ungermannova D, 2012, J BIOMOL SCREEN, V17, P421, DOI 10.1177/1087057111433843
   Whitehurst CB, 2009, J VIROL, V83, P4345, DOI 10.1128/JVI.02195-08
   Wilkinson KA, 2010, BIOCHEM J, V428, P133, DOI 10.1042/BJ20100158
   Wimmer P, 2015, VIRUSES-BASEL, V7, P4854, DOI 10.3390/v7092849
   Yang YL, 2007, CANCER RES, V67, P9472, DOI 10.1158/0008-5472.CAN-07-0568
   Zhang H, 2002, MOL CELL BIOL, V22, P6498, DOI 10.1128/MCB.22.18.6498-6508.2002
NR 62
TC 8
Z9 8
U1 0
U2 1
PU NATURE RESEARCH
PI BERLIN
PA HEIDELBERGER PLATZ 3, BERLIN, 14197, GERMANY
SN 2045-2322
J9 SCI REP-UK
JI Sci Rep
PD JUL 2
PY 2019
VL 9
AR 9523
DI 10.1038/s41598-019-45825-5
PG 16
WC Multidisciplinary Sciences
WE Science Citation Index Expanded (SCI-EXPANDED)
SC Science & Technology - Other Topics
GA IF9MK
UT WOS:000473417000014
PM 31266997
OA Green Published, gold
DA 2022-04-10
ER

PT J
AU Illiano, A
   Pinto, G
   Melchiorre, C
   Carpentieri, A
   Faraco, V
   Amoresano, A
AF Illiano, Anna
   Pinto, Gabriella
   Melchiorre, Chiara
   Carpentieri, Andrea
   Faraco, Vincenza
   Amoresano, Angela
TI Protein Glycosylation Investigated by Mass Spectrometry: An Overview
SO CELLS
LA English
DT Review
DE glycosylation; post-translational modification (PTM); mass
   spectrometry; quantitative analysis; glycosylation and diseases
   correlation
ID PEPTIDE IMMUNOAFFINITY ENRICHMENT; IMMUNOGLOBULIN VARIABLE REGION;
   PROSTATE-SPECIFIC ANTIGEN; LOW-ABUNDANCE PROTEINS; HIGH-THROUGHPUT;
   N-GLYCOSYLATION; CONGENITAL DISORDERS; SIALIC-ACID;
   QUANTITATIVE-ANALYSIS; HYDRAZIDE CHEMISTRY
AB The protein glycosylation is a post-translational modification of crucial importance for its involvement in molecular recognition, protein trafficking, regulation, and inflammation. Indeed, abnormalities in protein glycosylation are correlated with several disease states such as cancer, inflammatory diseases, and congenial disorders. The understanding of cellular mechanisms through the elucidation of glycan composition encourages researchers to find analytical solutions for their detection. Actually, the multiplicity and diversity of glycan structures bond to the proteins, the variations in polarity of the individual saccharide residues, and the poor ionization efficiencies make their detection much trickier than other kinds of biopolymers. An overview of the most prominent techniques based on mass spectrometry (MS) for protein glycosylation (glycoproteomics) studies is here presented. The tricks and pre-treatments of samples are discussed as a crucial step prodromal to the MS analysis to improve the glycan ionization efficiency. Therefore, the different instrumental MS mode is also explored for the qualitative and quantitative analysis of glycopeptides and the glycans structural composition, thus contributing to the elucidation of biological mechanisms.
C1 [Illiano, Anna; Pinto, Gabriella; Melchiorre, Chiara; Carpentieri, Andrea; Faraco, Vincenza; Amoresano, Angela] Univ Naples Federico II, Dept Chem Sci, Via Cinthia 26, I-80126 Naples, Italy.
   [Illiano, Anna] Univ Naples Federico II, CEINGE Adv Biotechnol, Via Cinthia 26, I-80126 Naples, Italy.
   [Amoresano, Angela] Consorzio Interuniv, Ist Nazl Biostrutture & Biosistemi, Viale Medaglie dOro 305, I-00136 Rome, Italy.
RP Faraco, V (corresponding author), Univ Naples Federico II, Dept Chem Sci, Via Cinthia 26, I-80126 Naples, Italy.
EM anna.illiano@unina.it; gabriella.pinto@unina.it;
   chiara.melchiorre@unina.it; acarpent@unina.it; vfaraco@unina.it;
   angamor@unina.it
OI Pinto, Gabriella/0000-0001-9169-3452; MELCHIORRE,
   Chiara/0000-0001-7912-6543
FU European Union (FSE, PON Ricerca e Innovazione)
FX Authors wish to thank European Union (FSE, PON Ricerca e Innovazione
   2014-2020, "Dottorati Innovativi con caratterizzazione Industriale").
   This research received no external funding.
CR Abrahams JL, 2020, CURR OPIN STRUC BIOL, V62, P56, DOI 10.1016/j.sbi.2019.11.009
   Affolter M, 2010, J PROTEOMICS, V73, P1079, DOI 10.1016/j.jprot.2009.11.008
   Agrawal P, 2017, CANCER CELL, V31, P804, DOI 10.1016/j.ccell.2017.05.007
   Akmacic IT, 2015, BIOCHEMISTRY-MOSCOW+, V80, P934, DOI 10.1134/S0006297915070123
   Al Teneiji A, 2017, MOL GENET METAB, V120, P235, DOI 10.1016/j.ymgme.2016.12.014
   Alagesan K., 2019, BIORXIV853036, DOI [10.1101/853036, DOI 10.1101/853036]
   Alley WR, 2013, ANNU REV ANAL CHEM, V6, P237, DOI 10.1146/annurev-anchem-062012-092609
   Amore A, 2015, BIOTECHNOL APPL BIOC, V62, P727, DOI 10.1002/bab.1325
   An HJ, 2006, J PROTEOME RES, V5, P1626, DOI 10.1021/pr060010k
   An HJ, 2011, MASS SPECTROM REV, V30, P560, DOI 10.1002/mas.20283
   Anders N, 2012, P NATL ACAD SCI USA, V109, P989, DOI 10.1073/pnas.1115858109
   Bratanis E, 2019, THESIS
   Breitling J, 2013, CSH PERSPECT BIOL, V5, DOI 10.1101/cshperspect.a013359
   Bresalier RS, 1996, GASTROENTEROLOGY, V110, P1354, DOI 10.1053/gast.1996.v110.pm8613039
   Bretthauer R.K, 2017, PICHIA PROTOCOLS, P107
   Buchanan B. B., 2015, BIOCH MOL BIOL PLANT
   Campbell MP, 2017, TRENDS GLYCOSCI GLYC, V29, pE51, DOI 10.4052/tigg.1601.1E
   Carperntieri A, 2010, EUR J MASS SPECTROM, V16, P123, DOI 10.1255/ejms.1035
   Chen R, 2009, J PROTEOME RES, V8, P651, DOI 10.1021/pr8008012
   Choudhary G, 2003, J PROTEOME RES, V2, P59, DOI 10.1021/pr025557n
   Clark MC, 2012, ANN NY ACAD SCI, V1253, P58, DOI 10.1111/j.1749-6632.2011.06304.x
   Cuccui J, 2015, J PHARM PHARMACOL, V67, P338, DOI 10.1111/jphp.12321
   Cummings R.D, 2017, FUNGI ESSENTIALS GLY
   Cummings RD, 2009, MOL BIOSYST, V5, P1087, DOI 10.1039/b907931a
   Cutalo JM, 2004, J AM SOC MASS SPECTR, V15, P1545, DOI 10.1016/j.jasms.2004.07.008
   Datta P, 2013, BIOTECHNOL BIOENG, V110, P1255, DOI 10.1002/bit.24841
   de Oliveira RM, 2018, FRONT ONCOL, V7, DOI 10.3389/fonc.2017.00328
   Dell A, 2001, SCIENCE, V291, P2351, DOI 10.1126/science.1058890
   Dell Anne, 2010, Int J Microbiol, V2010, P148178, DOI 10.1155/2010/148178
   Deshpande N, 2008, GLYCOBIOLOGY, V18, P626, DOI 10.1093/glycob/cwn044
   Drabovich AP, 2010, J PROTEOME RES, V9, P1236, DOI 10.1021/pr900729g
   Durham M, 2006, J CHROMATOGR A, V1132, P165, DOI 10.1016/j.chroma.2006.07.070
   Fitchette AC, 1999, PLANT PHYSIOL, V121, P333, DOI 10.1104/pp.121.2.333
   Frank J, 2008, PLANT PHYSIOL, V148, P1354, DOI 10.1104/pp.108.127027
   Freeze Hudson H, 2006, Curr Protoc Protein Sci, VChapter 12, DOI 10.1002/0471140864.ps1204s45
   Fuster MM, 2005, NAT REV CANCER, V5, P526, DOI 10.1038/nrc1649
   Geyer H, 2006, BBA-PROTEINS PROTEOM, V1764, P1853, DOI 10.1016/j.bbapap.2006.10.007
   Gianazza E, 2018, EXPERT REV PROTEOMIC, V15, P477, DOI 10.1080/14789450.2018.1484283
   Goldman R, 2015, PROTEOM CLIN APPL, V9, P17, DOI 10.1002/prca.201400152
   Gomord V, 2010, PLANT BIOTECHNOL J, V8, P564, DOI 10.1111/j.1467-7652.2009.00497.x
   Gorelik E, 2001, CANCER METAST REV, V20, P245, DOI 10.1023/A:1015535427597
   Gornik O, 2008, DIS MARKERS, V25, P267, DOI 10.1155/2008/493289
   Gray CJ, 2016, BBA-GEN SUBJECTS, V1860, P1688, DOI 10.1016/j.bbagen.2016.02.003
   Hammad LA, 2009, J AM SOC MASS SPECTR, V20, P1224, DOI 10.1016/j.jasms.2009.02.022
   Harvey DJ, 1996, J CHROMATOGR A, V720, P429, DOI 10.1016/0021-9673(95)00307-X
   Hennet T, 2015, TRENDS BIOCHEM SCI, V40, P377, DOI 10.1016/j.tibs.2015.03.002
   Hoja-Lukowicz D, 2013, GLYCOCONJUGATE J, V30, P205, DOI 10.1007/s10719-012-9374-5
   Holland M, 2002, CLIN EXP IMMUNOL, V129, P183, DOI 10.1046/j.1365-2249.2002.01864.x
   Hollander N, 2017, FRONT IMMUNOL, V8, DOI 10.3389/fimmu.2017.00912
   Hong QT, 2015, J PROTEOME RES, V14, P5179, DOI 10.1021/acs.jproteome.5b00756
   Hong QT, 2013, ANAL CHEM, V85, P8585, DOI 10.1021/ac4009995
   Horn C, 1999, J BIOL CHEM, V274, P32023, DOI 10.1074/jbc.274.45.32023
   Hu H, 2016, GLYCOCONJUGATE J, V33, P285, DOI 10.1007/s10719-015-9633-3
   Huang JC, 2017, ANAL BIOANAL CHEM, V409, P589, DOI 10.1007/s00216-016-0029-4
   Isailovic D, 2008, J PROTEOME RES, V7, P1109, DOI 10.1021/pr700702r
   Ishida H, 2005, FEBS LETT, V579, P71, DOI 10.1016/j.febslet.2004.11.037
   Jarrell KF, 2014, MICROBIOL MOL BIOL R, V78, P304, DOI 10.1128/MMBR.00052-13
   Jiang SB, 2012, EMERG MICROBES INFEC, V1, DOI 10.1038/emi.2012.1
   Julien S, 2011, CANCER RES, V71, P7683, DOI 10.1158/0008-5472.CAN-11-1139
   Kamiyama T, 2013, HEPATOLOGY, V57, P2314, DOI 10.1002/hep.26262
   Kannagi R, 2008, BBA-GEN SUBJECTS, V1780, P525, DOI 10.1016/j.bbagen.2007.10.007
   Keating CL, 2020, J PROTEOME RES, V19, P733, DOI 10.1021/acs.jproteome.9b00620
   Kerntke C, 2020, FRONT IMMUNOL, V11, DOI 10.3389/fimmu.2020.00118
   Keshishian H, 2007, MOL CELL PROTEOMICS, V6, P2212, DOI 10.1074/mcp.M700354-MCP200
   Kolli V, 2014, ANALYST, V139, P2144, DOI 10.1039/c3an02342g
   Kotsias M, 2019, PLOS ONE, V14, DOI 10.1371/journal.pone.0210759
   Kuai R, 2018, J CONTROL RELEASE, V282, P131, DOI 10.1016/j.jconrel.2018.04.041
   Kulasingam V, 2008, J PROTEOME RES, V7, P640, DOI 10.1021/pr7005999
   Kulasingam V, 2011, METHODS MOL BIOL, V728, P207, DOI 10.1007/978-1-61779-068-3_13
   Kumpel BM, 2020, SCI REP-UK, V10, DOI 10.1038/s41598-019-57393-9
   Kurogochi M, 2010, MOL CELL PROTEOMICS, V9, P2354, DOI 10.1074/mcp.M110.000430
   Kuzmanov U, 2013, BMC MED, V11, DOI 10.1186/1741-7015-11-31
   Lange V, 2008, MOL CELL PROTEOMICS, V7, P1489, DOI 10.1074/mcp.M800032-MCP200
   Lengqvist Johan, 2013, Methods Mol Biol, V1023, P21, DOI 10.1007/978-1-4614-7209-4_3
   Li Y, 2011, ANAL CHEM, V83, P240, DOI 10.1021/ac102319g
   Liang SY, 2014, BIOINFORMATICS, V30, P1908, DOI 10.1093/bioinformatics/btu139
   Liu T, 2005, J PROTEOME RES, V4, P2070, DOI 10.1021/pr0502065
   Lombard J, 2016, BIOL DIRECT, V11, DOI 10.1186/s13062-016-0137-2
   Lopez MF, 2010, CLIN CHEM, V56, P281, DOI 10.1373/clinchem.2009.137323
   Magalhaes A, 2017, CANCER CELL, V31, P733, DOI 10.1016/j.ccell.2017.05.012
   Maresca B, 2010, BIOL CHEM, V391, P1429, DOI 10.1515/BC.2010.146
   Marino K, 2010, NAT CHEM BIOL, V6, P713, DOI [10.1038/nchembio.437, 10.1038/NCHEMBIO.437]
   Matsubara N, 2018, FRONT IMMUNOL, V9, DOI 10.3389/fimmu.2018.00820
   Mayampurath AM, 2011, RAPID COMMUN MASS SP, V25, P2007, DOI 10.1002/rcm.5059
   McCann KJ, 2008, MOL IMMUNOL, V45, P1567, DOI 10.1016/j.molimm.2007.10.009
   Medina-Cano D, 2018, ELIFE, V7, DOI 10.7554/eLife.38309
   Monticelli M, 2016, J INHERIT METAB DIS, V39, P765, DOI 10.1007/s10545-016-9954-9
   Moreira IB, 2020, CELLS-BASEL, V9, DOI 10.3390/cells9020264
   Morelle W, 2007, NAT PROTOC, V2, P1585, DOI 10.1038/nprot.2007.227
   Moremen KW, 2012, NAT REV MOL CELL BIO, V13, P448, DOI 10.1038/nrm3383
   Nakano M, 2008, INT J CANCER, V122, P2301, DOI 10.1002/ijc.23364
   Neefjes J, 2011, NAT REV IMMUNOL, V11, P823, DOI 10.1038/nri3084
   Neelamegham S, 2011, GLYCOBIOLOGY, V21, P1541, DOI 10.1093/glycob/cwr036
   Nimmerjahn F, 2007, P NATL ACAD SCI USA, V104, P8433, DOI 10.1073/pnas.0702936104
   Nothaft H, 2013, J BIOL CHEM, V288, P6912, DOI 10.1074/jbc.R112.417857
   O'Flaherty R, 2019, MOL CELL PROTEOMICS, V18, P2191, DOI 10.1074/mcp.RA119.001531
   Ongay S, 2012, J SEP SCI, V35, P2341, DOI 10.1002/jssc.201200434
   Peanne R, 2018, EUR J MED GENET, V61, P643, DOI 10.1016/j.ejmg.2017.10.012
   Peixoto A, 2019, FRONT ONCOL, V9, DOI 10.3389/fonc.2019.00380
   Peixoto A, 2016, ONCOTARGET, V7, P63138, DOI 10.18632/oncotarget.11257
   Piacente F, 2017, J BIOL CHEM, V292, P7385, DOI 10.1074/jbc.M117.783217
   Pierce J.M, 2010, HDB GLYCOMICS, P397
   Pinho SS, 2015, NAT REV CANCER, V15, P540, DOI 10.1038/nrc3982
   Pinto G, 2015, EXPERT REV PROTEOMIC, V12, P61, DOI 10.1586/14789450.2015.1002474
   Pinto G, 2014, J PROTEOME RES, V13, P1112, DOI 10.1021/pr4012359
   Plasencia MD, 2008, J AM SOC MASS SPECTR, V19, P1706, DOI 10.1016/j.jasms.2008.07.020
   Pochec E, 2003, BBA-MOL CELL RES, V1643, P113, DOI 10.1016/j.bbamcr.2003.10.004
   Qiu RQ, 2005, ANAL CHEM, V77, P7225, DOI 10.1021/ac050554q
   Quan M.L.L., 2013, MOD CHEM APPL, V1, DOI [10.4172/2329-6798.1000e102, DOI 10.4172/2329-6798.1000E102]
   Radcliffe CM, 2007, J BIOL CHEM, V282, P7405, DOI 10.1074/jbc.M602690200
   Reiding KR, 2019, MOL CELL PROTEOMICS, V18, P3, DOI 10.1074/mcp.RA117.000454
   Reily C, 2019, NAT REV NEPHROL, V15, P346, DOI 10.1038/s41581-019-0129-4
   Ritchie G, 2010, VIROLOGY, V399, P257, DOI 10.1016/j.virol.2009.12.020
   Ruhaak LR, 2015, CHROMATOGRAPHIA, V78, P335, DOI 10.1007/s10337-014-2783-9
   Saldova R, 2008, DIS MARKERS, V25, P219, DOI 10.1155/2008/601583
   Sanda M, 2013, MOL CELL PROTEOMICS, V12, P1294, DOI 10.1074/mcp.M112.023325
   Schneider D, 2015, BLOOD, V125, P3287, DOI 10.1182/blood-2014-11-609404
   Scott DW, 2013, J AM HEART ASSOC, V2, DOI 10.1161/JAHA.113.000263
   Shi TJ, 2012, PROTEOMICS, V12, P1074, DOI 10.1002/pmic.201100436
   Sola RJ, 2009, J PHARM SCI-US, V98, P1223, DOI 10.1002/jps.21504
   Song EW, 2012, RAPID COMMUN MASS SP, V26, P1941, DOI 10.1002/rcm.6290
   Song EY, 2001, CANCER INVEST, V19, P799, DOI 10.1081/CNV-100107741
   Spiro RG, 2002, GLYCOBIOLOGY, V12, p43R, DOI 10.1093/glycob/12.4.43R
   Stanley P., 2017, N GLYCANS ESSENTIALS, V3rd
   Stockmann H, 2015, INTEGR BIOL-UK, V7, P1026, DOI 10.1039/c5ib00130g
   Stowell SR, 2015, ANNU REV PATHOL-MECH, V10, P473, DOI 10.1146/annurev-pathol-012414-040438
   Strasser R, 2004, FEBS LETT, V561, P132, DOI 10.1016/S0014-5793(04)00150-4
   Strasser R, 2016, GLYCOBIOLOGY, V26, P926, DOI 10.1093/glycob/cww023
   Strasser R, 2014, FRONT PLANT SCI, V5, DOI 10.3389/fpls.2014.00363
   Su ZP, 2020, INT J MOL SCI, V21, DOI 10.3390/ijms21062045
   Sun LN, 2016, GLYCOBIOLOGY, V26, P1029, DOI 10.1093/glycob/cww062
   Taylor N, 2012, TROP PLANT BIOL, V5, P127, DOI 10.1007/s12042-012-9099-4
   Trinchera M, 2017, BIOLOGY-BASEL, V6, DOI 10.3390/biology6010016
   Upreti RK, 2003, PROTEOMICS, V3, P363, DOI 10.1002/pmic.200390052
   Vankadari N, 2020, EMERG MICROBES INFEC, V9, P601, DOI 10.1080/22221751.2020.1739565
   Varki A., 2017, GLYCOSYLATION CHANGE
   Vietor R, 2003, PLANTA, V218, P269, DOI 10.1007/s00425-003-1099-z
   Vletter EM, 2020, FRONT IMMUNOL, V11, DOI 10.3389/fimmu.2020.00241
   Vreeker GCM, 2017, ANAL BIOANAL CHEM, V409, P359, DOI 10.1007/s00216-016-0073-0
   Walsh I, 2016, CURR OPIN STRUC BIOL, V40, P70, DOI 10.1016/j.sbi.2016.07.022
   WARBURG O, 1956, SCIENCE, V123, P309, DOI 10.1126/science.123.3191.309
   Watanabe Y, 2019, BBA-GEN SUBJECTS, V1863, P1480, DOI 10.1016/j.bbagen.2019.05.012
   Whiteaker JR, 2011, CLIN LAB MED, V31, P385, DOI 10.1016/j.cll.2011.07.004
   Whiteaker JR, 2010, MOL CELL PROTEOMICS, V9, P184, DOI 10.1074/mcp.M900254-MCP200
   Wilson IBH, 2001, GLYCOBIOLOGY, V11, P261, DOI 10.1093/glycob/11.4.261
   Wisniewski JR, 2012, ANAL CHEM, V84, P2631, DOI 10.1021/ac300006b
   Wuhrer M, 2013, GLYCOCONJUGATE J, V30, P11, DOI 10.1007/s10719-012-9376-3
   Xiang Y, 2010, J VIROL, V84, P12265, DOI 10.1128/JVI.01303-10
   Xie YM, 2004, ANAL CHEM, V76, P5186, DOI 10.1021/ac0496953
   Xu CC, 2015, NAT REV MOL CELL BIO, V16, P742, DOI 10.1038/nrm4073
   Yang ZP, 2004, J CHROMATOGR A, V1053, P79, DOI 10.1016/j.chroma.2004.08.150
   Yocum Anastasia K., 2009, Briefings in Functional Genomics & Proteomics, V8, P145, DOI 10.1093/bfgp/eln056
   Zaia J, 2010, OMICS, V14, P401, DOI 10.1089/omi.2009.0146
   Zhang H, 2003, NAT BIOTECHNOL, V21, P660, DOI 10.1038/nbt827
   Zhang HQ, 2012, PROTEOMICS, V12, P2510, DOI 10.1002/pmic.201100567
   Zhang JS, 2012, ANAL CHIM ACTA, V727, P47, DOI 10.1016/j.aca.2012.03.034
   Zhang TW, 2020, MOL BIOL REP, V47, P3025, DOI 10.1007/s11033-020-05373-y
   Zhao J, 2006, J PROTEOME RES, V5, P1792, DOI 10.1021/pr060034r
   Zhao Y, 2011, ANAL CHEM, V83, P8802, DOI 10.1021/ac201676a
   Zhu DL, 2002, BLOOD, V99, P2562, DOI 10.1182/blood.V99.7.2562
   Zhu FF, 2015, J AM SOC MASS SPECTR, V26, P1092, DOI 10.1007/s13361-015-1110-5
   Zhu R, 2017, METHOD ENZYMOL, V585, P397, DOI 10.1016/bs.mie.2016.11.009
   Zhu R, 2017, METHODS MOL BIOL, V1598, P213, DOI 10.1007/978-1-4939-6952-4_9
NR 163
TC 11
Z9 11
U1 9
U2 30
PU MDPI
PI BASEL
PA ST ALBAN-ANLAGE 66, CH-4052 BASEL, SWITZERLAND
EI 2073-4409
J9 CELLS-BASEL
JI Cells
PD SEP
PY 2020
VL 9
IS 9
AR 1986
DI 10.3390/cells9091986
PG 22
WC Cell Biology
WE Science Citation Index Expanded (SCI-EXPANDED)
SC Cell Biology
GA OG7CO
UT WOS:000582037700001
PM 32872358
OA Green Published, gold
DA 2022-04-10
ER

PT J
AU Chen, X
   Shen, JJ
   Li, XY
   Wang, X
   Long, M
   Lin, F
   Wei, JX
   Yang, LF
   Yang, CL
   Dong, K
   Zhang, HZ
AF Chen, Xi
   Shen, Jianjun
   Li, Xingyu
   Wang, Xi
   Long, Min
   Lin, Fang
   Wei, Junxia
   Yang, Longfei
   Yang, Chinglai
   Dong, Ke
   Zhang, Huizhong
TI Rlim, an E3 ubiquitinationligase, influences the stability of Stathmin
   protein in human osteosarcoma cells
SO CELLULAR SIGNALLING
LA English
DT Article
DE Stathmin; Rlim; E3 ubiquitin-protein ligase; Degradation
ID MITOTIC SPINDLE; DOWN-REGULATION; TRANSCRIPTION; EXPRESSION; GENE;
   DOMAIN; CHFR; TRANSACTIVATION; DIFFERENTIATION; PROLIFERATION
AB Stathmin is an oncoprotein and is expressed at high levels in a wide variety of human malignancies, which plays important roles in maintenance of malignant phenotypes. The regulation of Stathmin gene overexpression has been wildly explored, but the exact mechanism still needs to be elucidated. It is believed that regulation of an oncogene protein abundance through post-translational modification is essential for maintenance of malignant phenotypes. Here we identified the Rlim, a Ring H2 zinc finger protein with intrinsic ubiquitinationligase activity, as a Stathmin-interacting protein that could increase Stathmin turnover through binding with this targeted protein and then induce its degradation by proteasome in a ubiquitin-dependent manner. Inhibition of endogenous Rlim expression by siRNA could increase the level of Stathmin protein, which further led to cell proliferation and cell cycle changes in human osteosarcoma cell lines. On the other hand, forced overexpression of Rlim could decrease the level of Stathmin protein. These results demonstrate that Rlim is involved in the negative regulation of Stathmin protein level through physical interaction and ubiquitin-mediated proteolysis. Hence, Rlim is a novel regulator of Stathmin protein in a ubiquitin-dependent manner, and represents a new pathway for malignant phenotype turnover by modulating the level of Stathmin protein in human osteosarcomas. (C) 2014 Elsevier Inc. All rights reserved.
C1 [Chen, Xi; Shen, Jianjun; Wang, Xi; Long, Min; Lin, Fang; Wei, Junxia; Yang, Longfei; Dong, Ke; Zhang, Huizhong] Fourth Mil Med Univ, Tangdu Hosp, Dept Lab Med, Xian 710038, Shaanxi, Peoples R China.
   [Chen, Xi; Shen, Jianjun; Wang, Xi; Long, Min; Lin, Fang; Wei, Junxia; Yang, Longfei; Dong, Ke; Zhang, Huizhong] Fourth Mil Med Univ, Tangdu Hosp, Res Ctr, Xian 710038, Shaanxi, Peoples R China.
   [Li, Xingyu] Xian Hosp 4, Dept Ophthalmol, Xian, Peoples R China.
   [Yang, Chinglai] Emory Univ, Sch Med, Dept Microbiol & Immunol, Atlanta, GA 30322 USA.
RP Dong, K (corresponding author), Fourth Mil Med Univ, Tangdu Hosp, Dept Lab Med, Xinsi Rd, Xian 710038, Shaanxi, Peoples R China.
EM tddk01@126.com; td_zhz@163.com
FU National Natural Science Foundation of ChinaNational Natural Science
   Foundation of China (NSFC) [81001195]
FX Thanks to everyone from the Department of Clinical Laboratory for their
   sincere help and excellent technical assistance. This study was
   supported by a grant from the National Natural Science Foundation of
   China (No. 81001195).
CR Ahmed SF, 2012, J BIOL CHEM, V287, P15996, DOI 10.1074/jbc.M111.321083
   Bach I, 1999, NAT GENET, V22, P394, DOI 10.1038/11970
   Bach I, 2012, CELL RES, V22, P1524, DOI 10.1038/cr.2012.98
   Belletti B, 2011, EXPERT OPIN THER TAR, V15, P1249, DOI 10.1517/14728222.2011.620951
   Benlhabib H, 2006, GENE, V377, P177, DOI 10.1016/j.gene.2006.04.004
   Cassimeris L, 2002, CURR OPIN CELL BIOL, V14, P18, DOI 10.1016/S0955-0674(01)00289-7
   Chen G, 2003, MOL CELL PROTEOMICS, V2, P107, DOI 10.1074/mcp.M200055-MCP200
   Chen X, 2012, ONCOL LETT, V4, P319, DOI 10.3892/ol.2012.734
   Fan CD, 2009, CHEM RES TOXICOL, V22, P1517, DOI 10.1021/tx900111y
   Gao P., 2006, J MODERN ONCOL, V2, P210
   Gungor C, 2007, P NATL ACAD SCI USA, V104, P15000, DOI 10.1073/pnas.0703738104
   Her YR, 2009, J BIOL CHEM, V284, P8557, DOI 10.1074/jbc.M806702200
   Idogawa M, 2007, CANCER RES, V67, P911, DOI 10.1158/0008-5472.CAN-06-2360
   Johnsen SA, 2009, CANCER RES, V69, P128, DOI 10.1158/0008-5472.CAN-08-1630
   Jonkers I, 2009, CELL, V139, P999, DOI 10.1016/j.cell.2009.10.034
   Kashima L, 2009, ONCOGENE, V28, P2643, DOI 10.1038/onc.2009.123
   Kashima L, 2012, J BIOL CHEM, V287, P12975, DOI 10.1074/jbc.M111.321828
   Lee L, 2000, SCIENCE, V287, P2260, DOI 10.1126/science.287.5461.2260
   Li X, 2011, J BIOL CHEM, V286, P32344, DOI 10.1074/jbc.M111.249003
   Lin F., 2007, J MOD ONCOL, V15, P485
   Lin F, 2010, CELL SIGNAL, V22, P166, DOI 10.1016/j.cellsig.2009.09.030
   Mistry SJ, 2002, MT SINAI J MED, V69, P299
   Niethammer P, 2004, SCIENCE, V303, P1862, DOI 10.1126/science.1094108
   Nikolay R, 2004, J BIOL CHEM, V279, P2673, DOI 10.1074/jbc.M311112200
   Ogi K, 2005, CANCER BIOL THER, V4, P773, DOI 10.4161/cbt.4.7.1896
   Ostendorff HP, 2000, GENOMICS, V69, P120, DOI 10.1006/geno.2000.6311
   Ostendorff HP, 2002, NATURE, V416, P99, DOI 10.1038/416099a
   Polager S, 2003, J BIOL CHEM, V278, P1443, DOI 10.1074/jbc.M210327200
   Polzin RG, 2004, GENE, V341, P209, DOI 10.1016/j.gene.2004.06.052
   Rana S, 2008, EXPERT REV ANTICANC, V8, P1461, DOI 10.1586/14737140.8.9.1461
   Rubin CI, 2004, J CELL BIOCHEM, V93, P242, DOI 10.1002/jcb.20187
   Singh RR, 2005, CANCER RES, V65, P10594, DOI 10.1158/0008-5472.CAN-05-2268
   Steinmetz MO, 2007, J STRUCT BIOL, V158, P137, DOI 10.1016/j.jsb.2006.07.018
   Wang R, 2007, MOL MED, V13, P567, DOI 10.2119/2007-00046.Wang
   Wang X, 2010, CANCER BIOL THER, V10, P632, DOI 10.4161/cbt.10.6.12654
   Zhang HZ, 2006, CANCER BIOL THER, V5, P1457, DOI 10.4161/cbt.5.11.3272
   Zhao XD, 2008, NAT CELL BIOL, V10, P643, DOI 10.1038/ncb1727
NR 37
TC 12
Z9 15
U1 1
U2 17
PU ELSEVIER SCIENCE INC
PI NEW YORK
PA STE 800, 230 PARK AVE, NEW YORK, NY 10169 USA
SN 0898-6568
EI 1873-3913
J9 CELL SIGNAL
JI Cell. Signal.
PD JUL
PY 2014
VL 26
IS 7
BP 1532
EP 1538
DI 10.1016/j.cellsig.2014.03.018
PG 7
WC Cell Biology
WE Science Citation Index Expanded (SCI-EXPANDED)
SC Cell Biology
GA AI4FB
UT WOS:000336820000019
PM 24686088
DA 2022-04-10
ER

PT J
AU Mantovani, F
   Tocco, F
   Girardini, J
   Smith, P
   Gasco, M
   Lu, X
   Crook, T
   Del Sal, G
AF Mantovani, Fiamma
   Tocco, Francesca
   Girardini, Javier
   Smith, Paul
   Gasco, Milena
   Lu, Xin
   Crook, Tim
   Del Sal, Giannino
TI The prolyl isomerase Pin1 orchestrates p53 acetylation and dissociation
   from the apoptosis inhibitor iASPP
SO NATURE STRUCTURAL & MOLECULAR BIOLOGY
LA English
DT Article
ID DNA-DEPENDENT ACETYLATION; INTERACTING PROTEIN KINASE-2; IN-VIVO;
   GENE-EXPRESSION; CELL-CYCLE; PHOSPHORYLATES P53; FUNCTIONAL DOMAIN;
   COACTIVATOR P300; ACTIVATION; BINDING
AB The tumor-suppressor function of p53 relies on its transcriptional regulation, which is modulated by post-translational modification and interactions with regulatory proteins. The prolyl isomerase Pin1 has a central role in transducing phosphorylation of p53 into conformational changes that affect p53 stability and function. We found that Pin1 is required for efficient loading of p53 on target promoters upon stress. In addition, Pin1 is recruited to chromatin by p53 and stimulates binding of the p300 acetyltransferase and consequent p53 acetylation. Accordingly, tumor-associated mutations at Pin1-binding residues within the p53 proline-rich domain hamper acetylation of p53 by p300. After phosphorylation of p53 at Ser46 triggered by cytotoxic stimuli, Pin1 also mediates p53's dissociation from the apoptosis inhibitor iASPP, promoting cell death. In tumors bearing wild-type p53, expression of Pin1 and iASPP are inversely correlated, supporting the clinical relevance of these interactions.
C1 Univ Trieste, Dipartimento Biochim Biofis & Chim Macromol, Lab Nazl Consorz Interuniv Biotechnol, I-34100 Trieste, Italy.
   Breast Canc Res Ctr, Inst Canc Res, London SW3 6JB, England.
   Croce & Carle Hosp, Dept Med Oncol, I-12100 Cuneo, Italy.
   UCL, Ludwig Inst Canc Res, London W1W 7BS, England.
RP Del Sal, G (corresponding author), Univ Trieste, Dipartimento Biochim Biofis & Chim Macromol, Lab Nazl Consorz Interuniv Biotechnol, Area Sci Pk, I-34100 Trieste, Italy.
EM delsal@lncib.trieste.it
OI Lu, Xin/0000-0002-6587-1152
FU Breast Cancer Now [BREAST CANCER NOW RESEARCH CENTRE] Funding Source:
   Medline
CR Appella E, 2001, EUR J BIOCHEM, V268, P2764, DOI 10.1046/j.1432-1327.2001.02225.x
   Ard PG, 2002, MOL CELL BIOL, V22, P5650, DOI 10.1128/MCB.22.16.5650-5661.2002
   Bao L, 2004, AM J PATHOL, V164, P1727, DOI 10.1016/S0002-9440(10)63731-5
   Barlev NA, 2001, MOL CELL, V8, P1243, DOI 10.1016/S1097-2765(01)00414-2
   Bergamaschi D, 2003, NAT GENET, V33, P162, DOI 10.1038/ng1070
   Bergamaschi D, 2006, NAT GENET, V38, P1133, DOI 10.1038/ng1879
   Berger M, 2005, MOL CELL BIOL, V25, P5380, DOI 10.1128/MCB.25.13.5380-5388.2005
   Berger M, 2001, J BIOL CHEM, V276, P3785, DOI 10.1074/jbc.M008879200
   Bulavin DV, 1999, EMBO J, V18, P6845, DOI 10.1093/emboj/18.23.6845
   Buschmann T, 2001, MOL CELL BIOL, V21, P2743, DOI 10.1128/MCB.21.8.2743-2754.2001
   Ceskova P, 2006, J MOL BIOL, V357, P442, DOI 10.1016/j.jmb.2005.12.026
   Chipuk JE, 2004, SCIENCE, V303, P1010, DOI 10.1126/science.1092734
   D'Orazi G, 2002, NAT CELL BIOL, V4, P11, DOI 10.1038/ncb714
   Dornan D, 2001, EMBO REP, V2, P139, DOI 10.1093/embo-reports/kve025
   Dornan D, 2003, J BIOL CHEM, V278, P13431, DOI 10.1074/jbc.M211460200
   Dornan D, 2003, MOL CELL BIOL, V23, P8846, DOI 10.1128/MCB.23.23.8846-8861.2003
   Geng Y, 2003, CELL, V114, P431, DOI 10.1016/S0092-8674(03)00645-7
   Gu W, 1997, CELL, V90, P595, DOI 10.1016/S0092-8674(00)80521-8
   Hofmann TG, 2002, NAT CELL BIOL, V4, P1, DOI 10.1038/ncb715
   Kaeser MD, 2002, P NATL ACAD SCI USA, V99, P95, DOI 10.1073/pnas.012283399
   KERN SE, 1992, SCIENCE, V256, P827, DOI 10.1126/science.1589764
   Knights CD, 2006, J CELL BIOL, V173, P533, DOI 10.1083/jcb.200512059
   Lavin MF, 2006, CELL DEATH DIFFER, V13, P941, DOI 10.1038/sj.cdd.4401925
   Livak KJ, 2001, METHODS, V25, P402, DOI 10.1006/meth.2001.1262
   Luo JY, 2004, P NATL ACAD SCI USA, V101, P2259, DOI 10.1073/pnas.0308762101
   Mantovani F, 2004, MOL CELL, V14, P625, DOI 10.1016/j.molcel.2004.05.007
   MATLASHEWSKI GJ, 1987, MOL CELL BIOL, V7, P961, DOI 10.1128/MCB.7.2.961
   Mayo LD, 2005, J BIOL CHEM, V280, P25953, DOI 10.1074/jbc.M503026200
   Monte M, 2006, P NATL ACAD SCI USA, V103, P11160, DOI 10.1073/pnas.0510834103
   Oda K, 2000, CELL, V102, P849, DOI 10.1016/S0092-8674(00)00073-8
   Radhakrishnan SK, 2006, CELL CYCLE, V5, P519, DOI 10.4161/cc.5.5.2514
   Samuels-Lev Y, 2001, MOL CELL, V8, P781, DOI 10.1016/S1097-2765(01)00367-7
   Sullivan A, 2004, ONCOGENE, V23, P3328, DOI 10.1038/sj.onc.1207428
   Sun XF, 1996, ONCOGENE, V13, P407
   Sykes SM, 2006, MOL CELL, V24, P841, DOI 10.1016/j.molcel.2006.11.026
   Tang Y, 2006, MOL CELL, V24, P827, DOI 10.1016/j.molcel.2006.11.021
   Thomas M, 1999, MOL CELL BIOL, V19, P1092
   Toledo F, 2006, CANCER CELL, V9, P273, DOI 10.1016/j.ccr.2006.03.014
   Uchida T, 2003, CHEM BIOL, V10, P15, DOI 10.1016/S1074-5521(02)00310-1
   Vassilev LT, 2004, SCIENCE, V303, P844, DOI 10.1126/science.1092472
   Venot C, 1998, EMBO J, V17, P4668, DOI 10.1093/emboj/17.16.4668
   Walker KK, 1996, P NATL ACAD SCI USA, V93, P15335, DOI 10.1073/pnas.93.26.15335
   WANG Y, 1995, NATURE, V376, P88, DOI 10.1038/376088a0
   Wulf G, 2005, NAT CELL BIOL, V7, P435, DOI 10.1038/ncb0505-435
   Wulf GM, 2002, J BIOL CHEM, V277, P47976, DOI 10.1074/jbc.C200538200
   Xu YX, 2003, GENE DEV, V17, P2765, DOI 10.1101/gad.1135503
   Yaffe MB, 1997, SCIENCE, V278, P1957, DOI 10.1126/science.278.5345.1957
   Yeh ES, 2007, NAT REV CANCER, V7, P381, DOI 10.1038/nrc2107
   Zacchi P, 2002, NATURE, V419, P853, DOI 10.1038/nature01120
   Zhao Y, 2006, MOL CELL BIOL, V26, P2782, DOI 10.1128/MCB.26.7.2782-2790.2006
   Zheng HW, 2002, NATURE, V419, P849, DOI 10.1038/nature01116
   Zhou XZ, 2000, MOL CELL, V6, P873, DOI 10.1016/S1097-2765(00)00085-X
   Zhu JH, 1999, ONCOGENE, V18, P2149, DOI 10.1038/sj.onc.1202533
NR 53
TC 127
Z9 134
U1 0
U2 8
PU NATURE PUBLISHING GROUP
PI NEW YORK
PA 75 VARICK ST, 9TH FLR, NEW YORK, NY 10013-1917 USA
SN 1545-9993
EI 1545-9985
J9 NAT STRUCT MOL BIOL
JI Nat. Struct. Mol. Biol.
PD OCT
PY 2007
VL 14
IS 10
BP 912
EP 920
DI 10.1038/nsmb1306
PG 9
WC Biochemistry & Molecular Biology; Biophysics; Cell Biology
WE Science Citation Index Expanded (SCI-EXPANDED)
SC Biochemistry & Molecular Biology; Biophysics; Cell Biology
GA 221KR
UT WOS:000250226700013
PM 17906639
DA 2022-04-10
ER

PT J
AU Xu, YM
   Wu, DD
   Zheng, W
   Yu, FY
   Yang, F
   Yao, Y
   Zhou, Y
   Ching, YP
   Lau, ATY
AF Xu, Yan-Ming
   Wu, Dan-Dan
   Zheng, Wei
   Yu, Fei-Yuan
   Yang, Feng
   Yao, Yue
   Zhou, Yuan
   Ching, Yick-Pang
   Lau, Andy T. Y.
TI Proteome profiling of cadmium-induced apoptosis by antibody array
   analyses in human bronchial epithelial cells
SO ONCOTARGET
LA English
DT Article
DE cadmium; human lung cells; antibody array; post-translational
   modifications; mitochondrial pathway
ID OXIDATIVE STRESS; MALIGNANT-TRANSFORMATION; HEME OXYGENASE-1;
   CYTOTOXICITY; EXPRESSION; CLUSTERIN; EXPOSURE; PATHWAY
AB Protein array technology is a powerful platform for the simultaneous determination of the expression levels of a number of proteins as well as post-translational modification such as phosphorylation. Here, we screen and report for the first time, the dominant signaling cascades and apoptotic mediators during the course of cadmium (Cd)-induced cytotoxicity in human bronchial epithelial cells (BEAS-2B) by antibody array analyses. Proteins from control and Cd-treated cells were captured on Proteome Profiler T Arrays for the parallel determination of the relative levels of protein phosphorylation and proteins associated with apoptosis. Our results indicated that the p38 MAPK-and JNK-related signal transduction pathways were dramatically activated by Cd treatment. Cd potently stimulates the phosphorylations of p38a (MAPK14), JNK1/2 (MAPK8/9), and JUN; while the phosphorylations of Akt1, ERK1/2 (MAPK3/1), GSK3, and mTOR were suppressed. Moreover, there was an induction of proapoptotic protein BAX, release of cytochrome c (CYCS) from mitochondria, activation of caspase-3/9 (CASP3/9); as well as decreased expression of cell cycle checkpoint proteins (TP53, p21, and p27) and several inhibitors of apoptosis proteins (IAPs) [including cIAP-1/2 (BIRC2/3), XIAP (BIRC4), and survivin (BIRC5)]. Pretreatment of cells with the thiol antioxidant glutathione or p38 MAPK/JNK inhibitors before Cd treatment effectively abrogated ROS activation of p38 MAPK/JNK pathways and apoptosis-related proteins. Taken together, our results demonstrate that Cd causes oxidative stress-induced apoptosis; and the p38 MAPK/JNK and mitochondrial pathways are more importantly participated for signal transduction and the induction of apoptosis in Cd-exposed human lung cells.
C1 [Xu, Yan-Ming; Wu, Dan-Dan; Zheng, Wei; Yu, Fei-Yuan; Yang, Feng; Yao, Yue; Lau, Andy T. Y.] Shantou Univ, Coll Med, Dept Cell Biol & Genet, Lab Canc Biol & Epigenet, Shantou 515041, Guangdong, Peoples R China.
   [Zhou, Yuan; Ching, Yick-Pang] Univ Hong Kong, Li Ka Shing Fac Med, Sch Biomed Sci, Hong Kong, Hong Kong, Peoples R China.
RP Lau, ATY (corresponding author), Shantou Univ, Coll Med, Dept Cell Biol & Genet, Lab Canc Biol & Epigenet, Shantou 515041, Guangdong, Peoples R China.
EM andytylau@stu.edu.cn
RI Xu, yanming/Q-4931-2019; Lau, Andy Tao Yin/AAX-9980-2021
OI Lau, Andy Tao Yin/0000-0002-7146-7789; Wu, Dan-Dan/0000-0002-8515-2614;
   CHING, Yick Pang/0000-0002-6461-8358; Yang, Feng/0000-0002-7976-1640
FU National Natural Science Foundation of ChinaNational Natural Science
   Foundation of China (NSFC) [31170785, 81101785, 30870497, 31271445];
   Fund for University Talents of Guangdong Province; Guangdong Natural
   Science Foundation of ChinaNational Natural Science Foundation of
   Guangdong Province [S2012030006289]; Department of Education, Guangdong
   Government under the Top-tier University Development Scheme for Research
   and Control of Infectious Diseases
FX This work was supported by the grants from the National Natural Science
   Foundation of China (Nos. 31170785, 81101785, 30870497 and 31271445),
   the Fund for University Talents of Guangdong Province, the Guangdong
   Natural Science Foundation of China (No. S2012030006289), and the
   Department of Education, Guangdong Government under the Top-tier
   University Development Scheme for Research and Control of Infectious
   Diseases. We would like to thank members of the Lau And Xu laboratory
   for critical reading of this manuscript.
CR Almenara CCP, 2013, PLOS ONE, V8, DOI 10.1371/journal.pone.0068418
   Andrew AS, 2003, ENVIRON HEALTH PERSP, V111, P825, DOI 10.1289/ehp.111-1241504
   Chen DJ, 2014, BIOCHEM BIOPH RES CO, V445, P95, DOI 10.1016/j.bbrc.2014.01.146
   Durante W, 2003, J CELL PHYSIOL, V195, P373, DOI 10.1002/jcp.10274
   Galano E, 2014, METALLOMICS, V6, P587, DOI 10.1039/c3mt00344b
   Gillet S, 2006, PHOTOSYNTH RES, V89, P201, DOI 10.1007/s11120-006-9108-2
   Hartwig A., 2013, FREE RADIC BIOL MED, V55, P63
   Hartwig A, 2013, METAL IONS LIFE SCI, V11, P491, DOI 10.1007/978-94-007-5179-8_15
   Hartwig A, 2010, BIOMETALS, V23, P951, DOI 10.1007/s10534-010-9330-4
   Jing Y, 2012, TOXICOL SCI, V125, P10, DOI 10.1093/toxsci/kfr256
   Kaisman-Elbaz T, 2009, J CELL PHYSIOL, V220, P222, DOI 10.1002/jcp.21754
   Kampa M, 2008, ENVIRON POLLUT, V151, P362
   Lau ATY, 2007, CANCER RES, V67, P2107, DOI 10.1158/0008-5472.CAN-06-3771
   Lau ATY, 2006, TOXICOL APPL PHARM, V215, P1, DOI 10.1016/j.taap.2006.01.011
   Lau ATY, 2004, BIOCHEM J, V382, P641, DOI 10.1042/BJ20040224
   MARCOVECCHIO JE, 1993, ENVIRON MONIT ASSESS, V25, P119, DOI 10.1007/BF00549133
   Morse D, 2002, AM J RESP CELL MOL, V27, P8, DOI 10.1165/ajrcmb.27.1.4862
   Nakagawa J, 2007, ENVIRON TOXICOL PHAR, V24, P252, DOI 10.1016/j.etap.2007.06.002
   OBERDORSTER G, 1986, SCAND J WORK ENV HEA, V12, P523, DOI 10.5271/sjweh.2104
   Park EJ, 2008, TOXICOL LETT, V180, P222, DOI 10.1016/j.toxlet.2008.06.869
   PEI J, 1990, J BIOL CHEM, V265, P14061
   Prins JM, 2014, J PROTEOME RES, V13, P1677, DOI 10.1021/pr401159f
   Qu W, 2006, MOL CARCINOGEN, V45, P561, DOI 10.1002/mc.20185
   REDDEL RR, 1988, CANCER RES, V48, P1904
   Souza V, 2009, TOXICOL LETT, V187, P180, DOI 10.1016/j.toxlet.2009.02.021
   Stojanov Silvia, 2005, Expert Reviews in Molecular Medicine, V7, P1, DOI 10.1017/S1462399405009749
   Vido K, 2001, J BIOL CHEM, V276, P8469, DOI 10.1074/jbc.M008708200
   Wang B, 2012, PLOS ONE, V7, DOI 10.1371/journal.pone.0033853
   Wang Z, 1998, J BIOL CHEM, V273, P73, DOI 10.1074/jbc.273.1.73
   Xu GG, 1999, BIOMETALS, V12, P131, DOI 10.1023/A:1009273711068
   Xu YM, 2013, TOXICOL RES-UK, V2, P280, DOI 10.1039/c3tx50014d
   Yang CF, 1997, ENVIRON HEALTH PERSP, V105, P712, DOI 10.2307/3433726
   Yuan DX, 2013, MUTAT RES-GEN TOX EN, V757, P125, DOI 10.1016/j.mrgentox.2013.07.007
   Zhang HL, 2005, NAT CELL BIOL, V7, P909, DOI 10.1038/ncb1291
   Zhu JY, 2012, METALLOMICS, V4, P1064, DOI 10.1039/c2mt20134h
NR 35
TC 19
Z9 19
U1 3
U2 9
PU IMPACT JOURNALS LLC
PI ORCHARD PARK
PA 6666 E QUAKER ST, STE 1, ORCHARD PARK, NY 14127 USA
EI 1949-2553
J9 ONCOTARGET
JI Oncotarget
PD FEB 2
PY 2016
VL 7
IS 5
BP 6146
EP 6158
DI 10.18632/oncotarget.6738
PG 13
WC Oncology; Cell Biology
WE Science Citation Index Expanded (SCI-EXPANDED)
SC Oncology; Cell Biology
GA DD5HD
UT WOS:000369952800075
PM 26716417
OA Green Published, gold, Green Submitted
DA 2022-04-10
ER

PT J
AU Garcia-Garcia, A
   Rodriguez-Rocha, H
   Madayiputhiya, N
   Pappa, A
   Panayiotidis, MI
   Franco, R
AF Garcia-Garcia, A.
   Rodriguez-Rocha, H.
   Madayiputhiya, N.
   Pappa, A.
   Panayiotidis, M. I.
   Franco, R.
TI Biomarkers of Protein Oxidation in Human Disease
SO CURRENT MOLECULAR MEDICINE
LA English
DT Review
DE Alzheimer's disease; cancer; neurodegenerative diseases; oxidative
   post-translational modification; oxidative protein damage; oxidative
   stress; Parkinson's disease; reactive oxygen species; redox proteomics;
   redox signaling; RNS; ROS
ID MANGANESE SUPEROXIDE-DISMUTASE; METHIONINE SULFOXIDE REDUCTASE;
   PEROXIREDOXIN-I EXPRESSION; THIOL-SPECIFIC ANTIOXIDANT; METAL-CATALYZED
   OXIDATION; OXIDIZED PLASMA-PROTEINS; CYSTEINE-SULFINIC ACID; HUMAN BJ
   FIBROBLASTS; SRC TYROSINE KINASE; NITRIC-OXIDE
AB Oxidative stress is caused by an imbalance between the production of reactive species of oxygen and nitrogen (RS) and the ability to either detoxify the reactive intermediates produced or repair the resulting damage. Ultimately, oxidative stress conveys the alteration in cellular function caused by the reaction of RS with cellular constituents. Oxidative stress has been extensively reported to participate in the progression of a variety of human diseases including cancer, neurodegenerative disorders and diabetes. Oxidation of proteins is thought to be one of the major mechanisms by which oxidative stress is integrated into cellular signal transduction pathways. Thus, recent research efforts have been aimed to identify the role of specific oxidative protein modifications in the signal transduction events mediating the etiology of human diseases progression. The identification of these oxidative modifications has also raised the possibility of using this knowledge to develop new methods to diagnose diseases before they are clinically evident. In this work, we summarize the mechanisms by which RS generate distinct oxidative modifications. Furthermore, we also review the potential of these oxidative modifications to be used as early biomarkers of human disease.
C1 [Garcia-Garcia, A.; Rodriguez-Rocha, H.; Madayiputhiya, N.; Franco, R.] Univ Nebraska, Redox Biol Ctr, Lincoln, NE 68583 USA.
   [Garcia-Garcia, A.; Rodriguez-Rocha, H.; Franco, R.] Univ Nebraska, Sch Vet Med & Biomed Sci, Lincoln, NE 68583 USA.
   [Madayiputhiya, N.] Univ Nebraska, Dept Biochem, Lincoln, NE 68583 USA.
   [Pappa, A.] Democritus Univ Thrace, Dept Mol Biol & Genet, Alexandroupolis 68100, Greece.
   [Panayiotidis, M. I.] Univ Ioannina, Sch Med, Dept Pathol, GR-45110 Ioannina, Greece.
RP Franco, R (corresponding author), Univ Nebraska, Redox Biol Ctr, 114 VBS 0905, Lincoln, NE 68583 USA.
EM rfrancocruz2@unl.edu
RI Panagiotidis, Mihalis/AAG-6274-2020; Pappa, Aglaia/E-8663-2011; Franco,
   Rodrigo/D-9470-2013; Garcia-Garcia, Aracely/ABC-8905-2021; Pappa,
   Aglaia/P-4663-2019; RODRIGUEZ-ROCHA, HUMBERTO/K-4562-2019
OI Panagiotidis, Mihalis/0000-0002-1450-3552; Franco,
   Rodrigo/0000-0003-3241-8615; Garcia-Garcia, Aracely/0000-0002-1699-9678;
   Pappa, Aglaia/0000-0003-0913-4315; RODRIGUEZ-ROCHA,
   HUMBERTO/0000-0003-0486-7448; Panagiotidis, Mihalis/0000-0002-1130-5972
FU National Institutes of Health Grant Centers of Biomedical Research
   Excellence (COBRE) [P20RR17675]; Layman Award; Life Sciences Grant
   Program of the University of Nebraska-Lincoln; Alzheimer's
   AssociationAlzheimer's Association [NIRGD-10-172826]; Marie Curie
   International Reintegration Grant within the 6th and 7th European
   Community Framework Program [MIRG-CT-2006-036585,
   PIRG05-GA-2009-249315]; NATIONAL CENTER FOR RESEARCH RESOURCESUnited
   States Department of Health & Human ServicesNational Institutes of
   Health (NIH) - USANIH National Center for Research Resources (NCRR)
   [P20RR017675] Funding Source: NIH RePORTER
FX This work was supported by the National Institutes of Health Grant
   P20RR17675 Centers of Biomedical Research Excellence (COBRE), the Layman
   Award and the Life Sciences Grant Program of the University of
   Nebraska-Lincoln, the Alzheimer's Association (NIRGD-10-172826) (Franco
   R.); a Marie Curie International Reintegration Grant within the 6th and
   7th European Community Framework Program (MIRG-CT-2006-036585 Pappa A.
   and PIRG05-GA-2009-249315 Panayiotidis M.I.).
CR ADACHI T, 1992, CLIN CHIM ACTA, V212, P89, DOI 10.1016/0009-8981(92)90176-Q
   Ahmed N, 2005, J NEUROCHEM, V92, P255, DOI 10.1111/j.1471-4159.2004.02864.x
   Ahn JY, 2004, CANCER RES, V64, P7634, DOI 10.1158/0008-5472.CAN-04-1843
   Alam ZI, 1997, J NEUROCHEM, V69, P1326
   Ambrosone CB, 2005, CANCER RES, V65, P1105
   AMICI A, 1989, J BIOL CHEM, V264, P3341
   Aoyama K, 2000, ANN NEUROL, V47, P524, DOI 10.1002/1531-8249(200004)47:4<524::AID-ANA19>3.3.CO;2-X
   Arnold RS, 2001, P NATL ACAD SCI USA, V98, P5550, DOI 10.1073/pnas.101505898
   Azad N, 2006, J BIOL CHEM, V281, P34124, DOI 10.1074/jbc.M602551200
   Azad N, 2010, AM J RESP CELL MOL, V42, P578, DOI 10.1165/rcmb.2009-0094OC
   Bahar G, 2007, CANCER, V109, P54, DOI 10.1002/cncr.22386
   Basu S, 2004, FREE RADICAL RES, V38, P105, DOI 10.1080/10715760310001646895
   Batthyany C, 2006, J BIOL CHEM, V281, P20450, DOI 10.1074/jbc.M602814200
   Baynes JW, 1999, DIABETES, V48, P1, DOI 10.2337/diabetes.48.1.1
   BAYNES JW, 1991, DIABETES, V40, P405, DOI 10.2337/diabetes.40.4.405
   BECKMAN JS, 1992, ARCH BIOCHEM BIOPHYS, V298, P438, DOI 10.1016/0003-9861(92)90432-V
   Beckman KB, 1998, PHYSIOL REV, V78, P547, DOI 10.1152/physrev.1998.78.2.547
   Bedard K, 2007, PHYSIOL REV, V87, P245, DOI 10.1152/physrev.00044.2005
   Beer SM, 2004, J BIOL CHEM, V279, P47939, DOI 10.1074/jbc.M408011200
   Berlett BS, 1997, J BIOL CHEM, V272, P20313, DOI 10.1074/jbc.272.33.20313
   BEUTLER E, 1989, ANNU REV NUTR, V9, P287, DOI 10.1146/annurev.nu.09.070189.001443
   Bhandari V, 2006, P NATL ACAD SCI USA, V103, P11021, DOI 10.1073/pnas.0601057103
   Biteau B, 2003, NATURE, V425, P980, DOI 10.1038/nature02075
   Bjorklund A, 2010, PROG BRAIN RES, V184, P17, DOI 10.1016/S0079-6123(10)84002-6
   Boschi-Muller S, 2000, J BIOL CHEM, V275, P35908, DOI 10.1074/jbc.M006137200
   Botti H, 2004, FREE RADICAL BIO MED, V36, P152, DOI 10.1016/j.freeradbiomed.2003.10.006
   Bove Jordi, 2005, NeuroRx, V2, P484, DOI 10.1602/neurorx.2.3.484
   Brandon M, 2006, ONCOGENE, V25, P4647, DOI 10.1038/sj.onc.1209607
   Brennan ML, 2002, J BIOL CHEM, V277, P17415, DOI 10.1074/jbc.M112400200
   Brock JWC, 2008, J LIPID RES, V49, P847, DOI 10.1194/jlr.M800015-JLR200
   Brookes PS, 2004, AM J PHYSIOL-CELL PH, V287, pC817, DOI 10.1152/ajpcell.00139.2004
   Brown DI, 2009, FREE RADICAL BIO MED, V47, P1239, DOI 10.1016/j.freeradbiomed.2009.07.023
   Bryk R, 2000, NATURE, V407, P211, DOI 10.1038/35025109
   Butterfield DA, 2007, FREE RADICAL BIO MED, V43, P658, DOI 10.1016/j.freeradbiomed.2007.05.037
   Butterfield DA, 2001, CURR MED CHEM, V8, P815, DOI 10.2174/0929867013373048
   Cairns RA, 2011, NAT REV CANCER, V11, P85, DOI 10.1038/nrc2981
   Carini M, 2004, MASS SPECTROM REV, V23, P281, DOI 10.1002/mas.10076
   Cascorbi I, 2000, CANCER RES, V60, P644
   CHAE HZ, 1994, J BIOL CHEM, V269, P27670
   CHAE HZ, 1994, BIOFACTORS, V4, P177
   Chang JW, 2001, BIOCHEM BIOPH RES CO, V289, P507, DOI 10.1006/bbrc.2001.5989
   Chang TS, 2004, J BIOL CHEM, V279, P50994, DOI 10.1074/jbc.M409482200
   Chang XZ, 2007, BREAST CANCER RES, V9, DOI 10.1186/bcr1789
   Chanvorachote P, 2005, J BIOL CHEM, V280, P42044, DOI 10.1074/jbc.M510080200
   Chanvorachote P, 2006, CANCER RES, V66, P6353, DOI 10.1158/0008-5472.CAN-05-4533
   Chanvorachote P, 2009, J BIOL CHEM, V284, P28476, DOI 10.1074/jbc.M109.050864
   Chinta SJ, 2006, NEUROSCI LETT, V402, P137, DOI 10.1016/j.neulet.2006.03.056
   Choi JG, 2002, BIOCHEM BIOPH RES CO, V293, P1566, DOI 10.1016/S0006-291X(02)00420-5
   Clark CM, 2003, ARCH NEUROL-CHICAGO, V60, P1696, DOI 10.1001/archneur.60.12.1696
   Cobbs CS, 1996, CANCER RES, V56, P3192
   Colombo G, 2010, ANTIOXID REDOX SIGN, V12, P349, DOI 10.1089/ars.2009.2806
   Connor KM, 2007, CANCER RES, V67, P10260, DOI 10.1158/0008-5472.CAN-07-1204
   Constantin A, 2005, J CELL MOL MED, V9, P683, DOI 10.1111/j.1582-4934.2005.tb00498.x
   Costa C, 2002, J CLIN PATHOL, V55, P429, DOI 10.1136/jcp.55.6.429
   Cross JV, 2004, J CELL BIOCHEM, V93, P104, DOI 10.1002/jcb.20202
   Cross JV, 2004, BIOCHEM J, V381, P675, DOI 10.1042/BJ20040591
   Dalle-Donne I, 2005, MASS SPECTROM REV, V24, P55, DOI 10.1002/mas.20006
   Dalle-Donne I, 2006, CLIN CHEM, V52, P601, DOI 10.1373/clinchem.2005.061408
   Dalle-Donne I, 2003, CLIN CHIM ACTA, V329, P23, DOI 10.1016/S0009-8981(03)00003-2
   Dalle-Donne I, 2003, TRENDS MOL MED, V9, P169, DOI 10.1016/S1471-4914(03)00031-5
   Dattilo JB, 1997, ANN VASC SURG, V11, P307, DOI 10.1007/s100169900052
   Davies KJA, 2001, BIOCHIMIE, V83, P301, DOI 10.1016/S0300-9084(01)01250-0
   Davies MJ, 2005, BBA-PROTEINS PROTEOM, V1703, P93, DOI 10.1016/j.bbapap.2004.08.007
   Denicola A, 1996, ARCH BIOCHEM BIOPHYS, V328, P208, DOI 10.1006/abbi.1996.0162
   Dever JT, 2006, DRUG METAB DISPOS, V34, P2036, DOI 10.1124/dmd.106.012104
   Devi L, 2008, J BIOL CHEM, V283, P9089, DOI 10.1074/jbc.M710012200
   DIILIO C, 1995, CANCER LETT, V91, P19
   Ding QX, 2006, ANTIOXID REDOX SIGN, V8, P130, DOI 10.1089/ars.2006.8.130
   Ding QX, 2006, ANTIOXID REDOX SIGN, V8, P163, DOI 10.1089/ars.2006.8.163
   Donnelly PS, 2007, CURR OPIN CHEM BIOL, V11, P128, DOI 10.1016/j.cbpa.2007.01.678
   Droge W, 2002, PHYSIOL REV, V82, P47, DOI 10.1152/physrev.00018.2001
   Ellis HR, 1997, BIOCHEMISTRY-US, V36, P15013, DOI 10.1021/bi972191x
   ELSHARABASY MMH, 1993, CANCER LETT, V72, P11, DOI 10.1016/0304-3835(93)90004-S
   Ergen HA, 2007, ANTICANCER RES, V27, P1227
   ESTERBAUER H, 1991, FREE RADICAL BIO MED, V11, P81, DOI 10.1016/0891-5849(91)90192-6
   ESTERBAUER H, 1991, AM J CLIN NUTR, V53, pS314, DOI 10.1093/ajcn/53.1.314S
   Estrela JM, 2006, CRIT REV CL LAB SCI, V43, P143, DOI 10.1080/10408360500523878
   ESWORTHY RS, 1995, CANCER RES, V55, P957
   Finkel T, 2000, NATURE, V408, P239, DOI 10.1038/35041687
   FLOHE L, 1973, FEBS LETT, V32, P132, DOI 10.1016/0014-5793(73)80755-0
   Floor E, 1998, J NEUROCHEM, V70, P268
   Foster MW, 2009, TRENDS MOL MED, V15, P391, DOI 10.1016/j.molmed.2009.06.007
   Foster MW, 2003, TRENDS MOL MED, V9, P160, DOI 10.1016/S1471-4914(03)00028-5
   Franco R., 2007, Archives of Physiology and Biochemistry, V113, P234, DOI 10.1080/13813450701661198
   Franco R, 2009, CELL DEATH DIFFER, V16, P1303, DOI 10.1038/cdd.2009.107
   FRIGUET B, 1994, J BIOL CHEM, V269, P21639
   Fukumura D, 2006, NAT REV CANCER, V6, P521, DOI 10.1038/nrc1910
   GARRISON WM, 1962, RADIAT RES, V16, P483, DOI 10.2307/3571084
   GARRISON WM, 1987, CHEM REV, V87, P381, DOI 10.1021/cr00078a006
   Ghezzi P, 2005, FREE RADICAL RES, V39, P573, DOI 10.1080/10715760500072172
   Godon C, 1998, J BIOL CHEM, V273, P22480, DOI 10.1074/jbc.273.35.22480
   Gow A, 1996, ARCH BIOCHEM BIOPHYS, V333, P42, DOI 10.1006/abbi.1996.0362
   GRANDHEE SK, 1991, J BIOL CHEM, V266, P11649
   Grimsrud PA, 2008, J BIOL CHEM, V283, P21837, DOI 10.1074/jbc.R700019200
   Grune T, 1997, FASEB J, V11, P526, DOI 10.1096/fasebj.11.7.9212076
   Gunther MR, 1997, J BIOL CHEM, V272, P17086, DOI 10.1074/jbc.272.27.17086
   Guo Z, 2010, CELL CYCLE, V9, P4805, DOI 10.4161/cc.9.24.14323
   Guo Z, 2010, SCIENCE, V330, P517, DOI 10.1126/science.1192912
   Guzy RD, 2008, MOL CELL BIOL, V28, P718, DOI 10.1128/MCB.01338-07
   Hao G, 2006, P NATL ACAD SCI USA, V103, P1012, DOI 10.1073/pnas.0508412103
   HARRISON JE, 1976, J BIOL CHEM, V251, P1371
   Hasegawa Y, 2002, CANCER LETT, V182, P69, DOI 10.1016/S0304-3835(02)00069-1
   Hawkins CL, 1998, BIOCHEM J, V332, P617, DOI 10.1042/bj3320617
   HECKL K, 1988, NUCLEIC ACIDS RES, V16, P6224, DOI 10.1093/nar/16.13.6224
   Henchcliffe C, 2008, NAT CLIN PRACT NEURO, V4, P600, DOI 10.1038/ncpneuro0924
   HENSLEY K, 1995, J NEUROCHEM, V65, P2146
   Hess DT, 2005, NAT REV MOL CELL BIO, V6, P150, DOI 10.1038/nrm1569
   HIROSE K, 1993, FASEB J, V7, P361, DOI 10.1096/fasebj.7.2.8440412
   Hirotsu S, 1999, P NATL ACAD SCI USA, V96, P12333, DOI 10.1073/pnas.96.22.12333
   HJALMARSSON K, 1987, P NATL ACAD SCI USA, V84, P6340, DOI 10.1073/pnas.84.18.6340
   Hoshi T, 2001, J PHYSIOL-LONDON, V531, P1, DOI 10.1111/j.1469-7793.2001.0001j.x
   Huang P, 2000, NATURE, V407, P390, DOI 10.1038/35030140
   Huang XD, 1999, BIOCHEMISTRY-US, V38, P7609, DOI 10.1021/bi990438f
   Huang ZS, 2007, INT J CANCER, V120, P1396, DOI 10.1002/ijc.22525
   HUIE RE, 1993, FREE RADICAL RES COM, V18, P195, DOI 10.3109/10715769309145868
   HULKA BS, 1988, ARCH ENVIRON HEALTH, V43, P83, DOI 10.1080/00039896.1988.9935831
   Hur GC, 2003, CLIN CANCER RES, V9, P5768
   Ilic TV, 1999, FUNCT NEUROL, V14, P141
   Ioannidis JPA, 2011, JAMA-J AM MED ASSOC, V305, P2200, DOI 10.1001/jama.2011.713
   ISCHIROPOULOS H, 1992, ARCH BIOCHEM BIOPHYS, V298, P431, DOI 10.1016/0003-9861(92)90431-U
   Ishii N, 2007, MITOCHONDRION, V7, P24, DOI 10.1016/j.mito.2006.11.012
   Iyer AKV, 2008, NITRIC OXIDE-BIOL CH, V19, P146, DOI 10.1016/j.niox.2008.04.019
   JAIN A, 1991, P NATL ACAD SCI USA, V88, P1913, DOI 10.1073/pnas.88.5.1913
   Jana A, 2004, J BIOL CHEM, V279, P51451, DOI 10.1074/jbc.M404635200
   Jarvela S, 2010, BMC CANCER, V10, DOI 10.1186/1471-2407-10-104
   Jerlich A, 2000, INT J CLIN LAB RES, V30, P33, DOI 10.1007/s005990070031
   Jung S, 2002, FEBS LETT, V527, P91, DOI 10.1016/S0014-5793(02)03171-X
   Kadirvel R, 2007, HUM EXP TOXICOL, V26, P939, DOI 10.1177/0960327107087909
   Karihtala P, 2003, CLIN CANCER RES, V9, P3418
   KEILIN D, 1945, BIOCHEM J, V39, P148, DOI 10.1042/bj0390148
   Keller JN, 2000, FREE RADICAL BIO MED, V29, P1037, DOI 10.1016/S0891-5849(00)00412-3
   KHARITONOV VG, 1995, J BIOL CHEM, V270, P28158
   Kim JH, 2008, CLIN CANCER RES, V14, P2326, DOI 10.1158/1078-0432.CCR-07-4457
   Kim K, 2009, ONCOL REP, V21, P1391, DOI 10.3892/or_00000366
   Kinnula VL, 2004, AM J RESP CELL MOL, V31, P147, DOI 10.1165/rcmb.2003-0409OC
   Kinnula VL, 2002, J PATHOL, V196, P316, DOI 10.1002/path.1042
   Klatt P, 2000, EUR J BIOCHEM, V267, P4928, DOI 10.1046/j.1432-1327.2000.01601.x
   Klaunig JE, 2010, TOXICOL PATHOL, V38, P96, DOI 10.1177/0192623309356453
   Knott AB, 2008, NAT REV NEUROSCI, V9, P505, DOI 10.1038/nrn2417
   KNOX WE, 1948, J BACTERIOL, V55, P451, DOI 10.1128/JB.55.4.451-458.1948
   KRISTAL BS, 1992, J GERONTOL, V47, pB107, DOI 10.1093/geronj/47.4.B107
   Kryston TB, 2011, MUTAT RES-FUND MOL M, V711, P193, DOI 10.1016/j.mrfmmm.2010.12.016
   Kuninaka S, 2000, BRIT J CANCER, V83, P928, DOI 10.1054/bjoc.2000.1367
   Kwong JQ, 2006, J NEUROCHEM, V97, P1659, DOI 10.1111/j.1471-4159.2006.03990.x
   Lahdenranta J, 2009, CANCER RES, V69, P2801, DOI 10.1158/0008-5472.CAN-08-4051
   Lambeth JD, 2004, NAT REV IMMUNOL, V4, P181, DOI 10.1038/nri1312
   LANCASTER JR, 1994, P NATL ACAD SCI USA, V91, P8137, DOI 10.1073/pnas.91.17.8137
   Laurent A, 2005, CANCER RES, V65, P948
   Le DT, 2009, J BIOL CHEM, V284, P4354, DOI 10.1074/jbc.M805891200
   Lee SR, 1999, J BIOL CHEM, V274, P4722, DOI 10.1074/jbc.274.8.4722
   Lenaz G, 2002, ANN NY ACAD SCI, V959, P199, DOI 10.1111/j.1749-6632.2002.tb02094.x
   Lessene G, 2008, NAT REV DRUG DISCOV, V7, P989, DOI 10.1038/nrd2658
   Levine RL, 1996, P NATL ACAD SCI USA, V93, P15036, DOI 10.1073/pnas.93.26.15036
   LI YB, 1995, NAT GENET, V11, P376, DOI 10.1038/ng1295-376
   Lin CC, 2009, CHEM RES TOXICOL, V22, P1232, DOI 10.1021/tx900008h
   Lin ZD, 2007, P NATL ACAD SCI USA, V104, P9597, DOI 10.1073/pnas.0703774104
   Liu L, 2004, CELL, V116, P617, DOI 10.1016/S0092-8674(04)00131-X
   Lozano-Juste J, 2011, J EXP BOT
   LYNCH RE, 1978, J BIOL CHEM, V253, P4697
   MacMillan-Crow LA, 2000, ARCH BIOCHEM BIOPHYS, V377, P350, DOI 10.1006/abbi.2000.1799
   Mak S, 2001, CHEST, V120, P2035, DOI 10.1378/chest.120.6.2035
   Mannello F, 2009, CELL ONCOL, V31, P383, DOI 10.3233/CLO-2009-0483
   Mantymaa P, 2000, BRIT J HAEMATOL, V108, P574, DOI 10.1046/j.1365-2141.2000.01852.x
   Markesbery WR, 2006, ANTIOXID REDOX SIGN, V8, P2039, DOI 10.1089/ars.2006.8.2039
   Markesbery WR, 1997, FREE RADICAL BIO MED, V23, P134, DOI 10.1016/S0891-5849(96)00629-6
   Martin-Gallan P, 2003, FREE RADICAL BIO MED, V34, P1563, DOI 10.1016/S0891-5849(03)00185-0
   Mattagajasingh SN, 2008, J APPL TOXICOL, V28, P987, DOI 10.1002/jat.1364
   Mayeux Richard, 2004, NeuroRx, V1, P182, DOI 10.1602/neurorx.1.2.182
   MCCORD JM, 1969, J BIOL CHEM, V244, P6056
   Menter DG, 2010, CLIN CANCER RES, V16, P1384, DOI 10.1158/1078-0432.CCR-09-0788
   Michell AW, 2004, BRAIN, V127, P1693, DOI 10.1093/brain/awh198
   MICHELSON AM, 1977, PHOTOCHEM PHOTOBIOL, V25, P55, DOI 10.1111/j.1751-1097.1977.tb07424.x
   Mieyal JJ, 2008, ANTIOXID REDOX SIGN, V10, P1941, DOI 10.1089/ars.2008.2089
   Moore K, 1998, FREE RADICAL RES, V28, P659, DOI 10.3109/10715769809065821
   Morabito F, 2004, MEDIAT INFLAMM, V13, P381, DOI 10.1080/09629350400008760
   MORROW JD, 1992, P NATL ACAD SCI USA, V89, P10721, DOI 10.1073/pnas.89.22.10721
   MORROW JD, 1990, P NATL ACAD SCI USA, V87, P9383, DOI 10.1073/pnas.87.23.9383
   Moskovitz J, 1996, P NATL ACAD SCI USA, V93, P2095, DOI 10.1073/pnas.93.5.2095
   Muscat JE, 2004, FREE RADICAL BIO MED, V36, P464, DOI 10.1016/j.freeradbiomed.2003.11.018
   Narko K, 1997, J BIOL CHEM, V272, P21455, DOI 10.1074/jbc.272.34.21455
   Navarro J, 1999, FREE RADICAL BIO MED, V26, P410, DOI 10.1016/S0891-5849(98)00213-5
   Naylor S, 2003, EXPERT REV MOL DIAGN, V3, P525, DOI 10.1586/14737159.3.5.525
   Nelson KK, 2003, CLIN CANCER RES, V9, P424
   Netto LES, 1996, J BIOL CHEM, V271, P15315, DOI 10.1074/jbc.271.26.15315
   Noh DY, 2001, ANTICANCER RES, V21, P2085
   Nowsheen S, 2009, MUTAT RES-GEN TOX EN, V674, P131, DOI 10.1016/j.mrgentox.2008.09.010
   Nystrom T, 2005, EMBO J, V24, P1311, DOI 10.1038/sj.emboj.7600599
   Ogasawara Y, 2010, TOXICOL LETT, V195, P1, DOI 10.1016/j.toxlet.2010.03.001
   Olson SY, 2008, NITRIC OXIDE-BIOL CH, V19, P170, DOI 10.1016/j.niox.2008.04.005
   Oltra AM, 2001, FREE RADICAL BIO MED, V30, P1286, DOI 10.1016/S0891-5849(01)00521-4
   OMAYE ST, 1975, RES COMMUN CHEM PATH, V12, P695
   Orhan H, 2004, FREE RADICAL RES, V38, P1269, DOI 10.1080/10715760400013763
   OSHINO N, 1973, BIOCHEM J, V131, P555, DOI 10.1042/bj1310555
   Pandey KB, 2010, CLIN BIOCHEM, V43, P508, DOI 10.1016/j.clinbiochem.2009.11.011
   Park HS, 2004, J BIOL CHEM, V279, P7584, DOI 10.1074/jbc.M304183200
   Park SG, 2000, J BIOL CHEM, V275, P5723, DOI 10.1074/jbc.275.8.5723
   PARKER WD, 1989, ANN NEUROL, V26, P719, DOI 10.1002/ana.410260606
   Pattison DI, 2001, CHEM RES TOXICOL, V14, P1453, DOI 10.1021/tx0155451
   Pennathur S, 2004, FRONT BIOSCI-LANDMRK, V9, P565, DOI 10.2741/1257
   Perera FP, 2000, CARCINOGENESIS, V21, P517, DOI 10.1093/carcin/21.3.517
   Perluigi M, 2010, PROTEOME SCI, V8, DOI 10.1186/1477-5956-8-13
   Pfeiffer S, 2000, J BIOL CHEM, V275, P6346, DOI 10.1074/jbc.275.9.6346
   Pfeiffer S, 1998, J BIOL CHEM, V273, P27280, DOI 10.1074/jbc.273.42.27280
   Pignatelli B, 2001, CANCER RES, V61, P778
   Poole LB, 2004, ANNU REV PHARMACOL, V44, P325, DOI 10.1146/annurev.pharmtox.44.101802.121735
   Przedborski S, 2005, ANTIOXID REDOX SIGN, V7, P685, DOI 10.1089/ars.2005.7.685
   Ptolemy AS, 2007, AMINO ACIDS, V33, P3, DOI 10.1007/s00726-007-0542-z
   Qiu HM, 2003, AM J PATHOL, V162, P403, DOI 10.1016/S0002-9440(10)63835-7
   Quinn MT, 2006, CLIN SCI, V111, P1, DOI 10.1042/cs20060059
   Rabilloud T, 2002, J BIOL CHEM, V277, P19396, DOI 10.1074/jbc.M106585200
   RADI R, 1991, J BIOL CHEM, V266, P22028
   RADI R, 1994, ARCH BIOCHEM BIOPHYS, V308, P89, DOI 10.1006/abbi.1994.1013
   Radi R, 2004, P NATL ACAD SCI USA, V101, P4003, DOI 10.1073/pnas.0307446101
   Raftery MJ, 2001, J BIOL CHEM, V276, P33393, DOI 10.1074/jbc.M101566200
   Rahman MA, 2010, J BIOL CHEM, V285, P3806, DOI 10.1074/jbc.M109.059782
   RAMASARMA T, 1982, BIOCHIM BIOPHYS ACTA, V694, P69, DOI 10.1016/0304-4157(82)90014-4
   Refsgaard HHF, 2000, P NATL ACAD SCI USA, V97, P611, DOI 10.1073/pnas.97.2.611
   REMMER H, 1984, XENOBIOTICA, V14, P207, DOI 10.3109/00498258409151406
   Requena JR, 2001, P NATL ACAD SCI USA, V98, P69, DOI 10.1073/pnas.011526698
   Ridnour LA, 2006, ANTIOXID REDOX SIGN, V8, P1329, DOI 10.1089/ars.2006.8.1329
   Ripp SL, 1999, ARCH BIOCHEM BIOPHYS, V367, P322, DOI 10.1006/abbi.1999.1247
   Roberts LJ, 2000, FREE RADICAL BIO MED, V28, P505, DOI 10.1016/S0891-5849(99)00264-6
   Rodgers KJ, 2006, J NEUROCHEM, V98, P1061, DOI 10.1111/j.1471-4159.2006.03941.x
   Roos WP, 2006, TRENDS MOL MED, V12, P440, DOI 10.1016/j.molmed.2006.07.007
   Rosen P, 2001, DIABETES-METAB RES, V17, P189, DOI 10.1002/dmrr.196
   Roshchupkina GI, 2008, FREE RADICAL BIO MED, V45, P312, DOI 10.1016/j.freeradbiomed.2008.04.019
   Rossner P, 2007, J CELL MOL MED, V11, P1138, DOI 10.1111/j.1582-4934.2007.00097.x
   Salvi M, 2007, J BIOL CHEM, V282, P24407, DOI 10.1074/jbc.M701589200
   Sastre J, 2003, FREE RADICAL BIO MED, V35, P1, DOI 10.1016/S0891-5849(03)00184-9
   SCHAPIRA AHV, 1990, J NEUROCHEM, V54, P823, DOI 10.1111/j.1471-4159.1990.tb02325.x
   Schapira AHV, 2008, LANCET NEUROL, V7, P97, DOI 10.1016/S1474-4422(07)70327-7
   Schneider C, 2001, J BIOL CHEM, V276, P20831, DOI 10.1074/jbc.M101821200
   Schonhoff CM, 2002, BIOCHEMISTRY-US, V41, P13570, DOI 10.1021/bi026262q
   Schroder E, 2000, STRUCTURE, V8, P605, DOI 10.1016/S0969-2126(00)00147-7
   SCHUESSLER H, 1984, INT J RADIAT BIOL, V45, P267, DOI 10.1080/09553008414550381
   SCHULTE PA, 1992, ENVIRON HEALTH PERSP, V98, P143, DOI 10.2307/3431261
   Sedelnikova OA, 2010, MUTAT RES-REV MUTAT, V704, P152, DOI 10.1016/j.mrrev.2009.12.005
   Selkoe DJ, 2001, PHYSIOL REV, V81, P741, DOI 10.1152/physrev.2001.81.2.741
   Sharov VS, 1999, FEBS LETT, V455, P247, DOI 10.1016/S0014-5793(99)00888-1
   Sherer TB, 2005, ANTIOXID REDOX SIGN, V7, P627, DOI 10.1089/ars.2005.7.627
   Sherer TB, 2007, J NEUROCHEM, V100, P1469, DOI 10.1111/j.1471-4159.2006.04333.x
   SIES H, 1995, AM J CLIN NUTR, V62, P1315
   Simola N, 2007, NEUROTOX RES, V11, P151, DOI 10.1007/BF03033565
   Sitte N, 2000, FASEB J, V14, P2503, DOI 10.1096/fj.00-0210com
   Sitte N, 2000, FASEB J, V14, P2495, DOI 10.1096/fj.00-0209com
   Slane BG, 2006, CANCER RES, V66, P7615, DOI 10.1158/0008-5472.CAN-06-0833
   Smith MA, 1998, J HISTOCHEM CYTOCHEM, V46, P731, DOI 10.1177/002215549804600605
   Stadtman ER, 1998, DRUG METAB REV, V30, P225, DOI 10.3109/03602539808996310
   Stadtman ER, 2003, AMINO ACIDS, V25, P207, DOI 10.1007/s00726-003-0011-2
   Su B, 2010, BBA-MOL BASIS DIS, V1802, P135, DOI 10.1016/j.bbadis.2009.09.013
   Sudarshan S, 2009, MOL CELL BIOL, V29, P4080, DOI 10.1128/MCB.00483-09
   Sultana R, 2006, ANTIOXID REDOX SIGN, V8, P2021, DOI 10.1089/ars.2006.8.2021
   Sultana R, 2011, J ALZHEIMERS DIS, V24, P77, DOI 10.3233/JAD-2011-101425
   Suresh A, 2003, BRIT J HAEMATOL, V120, P457, DOI 10.1046/j.1365-2141.2003.04074.x
   Swallow A., 1960, RAD CHEM ORGANIC COM
   SZATROWSKI TP, 1991, CANCER RES, V51, P794
   Szeto SSW, 2007, J BIOL CHEM, V282, P27518, DOI 10.1074/jbc.M700601200
   TAKAHASHI MA, 1983, ARCH BIOCHEM BIOPHYS, V226, P558, DOI 10.1016/0003-9861(83)90325-9
   Tamura S, 2006, FREE RADICAL RES, V40, P1198, DOI 10.1080/10715760600895191
   Tang CH., 2011, BIOCH BIOPHYS ACTA
   Tanriover N, 2008, NEUROL RES, V30, P940, DOI 10.1179/174313208X319099
   Tanriverdi T, 2007, J CANCER RES CLIN, V133, P627, DOI 10.1007/s00432-007-0212-2
   Thomas DD, 2002, P NATL ACAD SCI USA, V99, P12691, DOI 10.1073/pnas.202312699
   Torok NJ, 2002, CANCER RES, V62, P1648
   Torres CA, 2008, FREE RADICAL BIO MED, V44, P403, DOI 10.1016/j.freeradbiomed.2007.10.002
   Trachootham D, 2009, NAT REV DRUG DISCOV, V8, P579, DOI 10.1038/nrd2803
   UCHIDA K, 1990, BIOCHEM BIOPH RES CO, V169, P265, DOI 10.1016/0006-291X(90)91463-3
   Uchida K, 2000, FREE RADICAL BIO MED, V28, P1685, DOI 10.1016/S0891-5849(00)00226-4
   Uchida K, 2003, PROG LIPID RES, V42, P318, DOI 10.1016/S0163-7827(03)00014-6
   UCHIDA K, 1993, J BIOL CHEM, V268, P6388
   Ushio-Fukai M, 2009, ANTIOXID REDOX SIGN, V11, P1289, DOI [10.1089/ars.2008.2333, 10.1089/ARS.2008.2333]
   Valko M, 2007, INT J BIOCHEM CELL B, V39, P44, DOI 10.1016/j.biocel.2006.07.001
   van der Vliet A, 1998, J BIOL CHEM, V273, P30255, DOI 10.1074/jbc.273.46.30255
   Velu CS, 2007, BIOCHEMISTRY-US, V46, P7765, DOI 10.1021/bi700425y
   Verzijl N, 2000, BIOCHEM J, V350, P381, DOI 10.1042/0264-6021:3500381
   Vina J, 2007, J ALZHEIMERS DIS, V11, P175
   Wang LI, 2001, J NATL CANCER I, V93, P1818, DOI 10.1093/jnci/93.23.1818
   Wang Liwei, 2005, Gastric Cancer, V8, P18, DOI 10.1007/s10120-004-0310-7
   Wang TC, 2007, MUTAT RES-FUND MOL M, V615, P75, DOI 10.1016/j.mrfmmm.2006.10.003
   Wei W, 2011, CARCINOGENESIS, V32, P973, DOI 10.1093/carcin/bgr041
   Wei W, 2010, SCI TRANSL MED, V2, DOI 10.1126/scitranslmed.3000328
   WELLSKNECHT KJ, 1995, BIOCHEMISTRY-US, V34, P3702, DOI 10.1021/bi00011a027
   Wheatley-Price P, 2008, CANCER-AM CANCER SOC, V112, P1037, DOI 10.1002/cncr.23267
   WINK DA, 1994, CHEM RES TOXICOL, V7, P519, DOI 10.1021/tx00040a007
   WINTERBOURN CC, 1985, BIOCHIM BIOPHYS ACTA, V840, P204, DOI 10.1016/0304-4165(85)90120-5
   Woo HA, 2005, J BIOL CHEM, V280, P3125, DOI 10.1074/jbc.C400496200
   Wu H, 2007, J ALLERGY CLIN IMMUN, V120, P322, DOI 10.1016/j.jaci.2007.04.022
   Xu Y, 2008, MOL CANCER RES, V6, P1881, DOI 10.1158/1541-7786.MCR-08-0253
   Yanagawa T, 2000, CANCER LETT, V156, P27, DOI 10.1016/S0304-3835(00)00434-1
   Yanagawa T, 1999, CANCER LETT, V145, P127, DOI 10.1016/S0304-3835(99)00243-8
   Yeh CC, 2010, CARCINOGENESIS, V31, P228, DOI 10.1093/carcin/bgp286
   Yeung BHY, 2008, BRIT J CANCER, V99, P283, DOI 10.1038/sj.bjc.6604477
   Yilmaz Ilker A., 2003, International Urology and Nephrology, V35, P345, DOI 10.1023/B:UROL.0000022920.93994.ba
   Yoshida Y, 2009, NEUROBIOL AGING, V30, P174, DOI 10.1016/j.neurobiolaging.2007.06.012
   Yusuf MA, 2010, FREE RADICAL BIO MED, V49, P908, DOI 10.1016/j.freeradbiomed.2010.06.020
   Zeng BY, 2005, MECH AGEING DEV, V126, P760, DOI 10.1016/j.mad.2005.01.008
   Zhang B, 2009, CANCER LETT, V286, P154, DOI 10.1016/j.canlet.2009.04.043
   Zhang HJ, 1999, CANCER RES, V59, P6276
   ZIGLER JS, 1985, ARCH BIOCHEM BIOPHYS, V241, P163, DOI 10.1016/0003-9861(85)90372-8
NR 299
TC 26
Z9 29
U1 0
U2 33
PU BENTHAM SCIENCE PUBL LTD
PI SHARJAH
PA EXECUTIVE STE Y-2, PO BOX 7917, SAIF ZONE, 1200 BR SHARJAH, U ARAB
   EMIRATES
SN 1566-5240
EI 1875-5666
J9 CURR MOL MED
JI Curr. Mol. Med.
PD JUL
PY 2012
VL 12
IS 6
BP 681
EP 697
DI 10.2174/156652412800792543
PG 17
WC Medicine, Research & Experimental
WE Science Citation Index Expanded (SCI-EXPANDED)
SC Research & Experimental Medicine
GA 962XP
UT WOS:000305583400004
PM 22292436
DA 2022-04-10
ER

PT J
AU Sarto, C
   Marocchi, A
   Sanchez, JC
   Giannone, D
   Frutiger, S
   Golaz, O
   Wilkins, MR
   Doro, G
   Cappellano, F
   Hughes, G
   Hochstrasser, DF
   Mocarelli, P
AF Sarto, C
   Marocchi, A
   Sanchez, JC
   Giannone, D
   Frutiger, S
   Golaz, O
   Wilkins, MR
   Doro, G
   Cappellano, F
   Hughes, G
   Hochstrasser, DF
   Mocarelli, P
TI Renal cell carcinoma and normal kidney protein expression
SO ELECTROPHORESIS
LA English
DT Article; Proceedings Paper
CT 2nd Siena 2D Electrophoresis - From Genome to Proteome
CY SEP 16-18, 1996
CL SIENA, ITALY
DE kidney; two-dimensional polyacrylamide gel electrophoresis; renal cell
   carcinoma; database
ID POLYACRYLAMIDE-GEL ELECTROPHORESIS; INTERCELLULAR-ADHESION MOLECULE-1;
   POLYMERASE CHAIN-REACTION; 2-DIMENSIONAL ELECTROPHORESIS; CANCER; GENE;
   TUMORS; MAP; METASTASIS; DATABASE
AB Renal cell carcinoma (RCC), a human kidney cancer from the proximal tubular epithelium, accounts for about 3% of adult malignancies. Molecular and cytogenetic analysis have highlighted deletions, translocations, or loss of heterozygosity in the 3p21-p26, a putative RCC locus, as well as in 6q, 8p, 9pq, and 14pq. Studies on phenotypic expression of human kidney tissue and on post-translational modification in RCC have not yet provided a marker for early renal cell carcinoma diagnosis. Current dignostic methods do not help to detect the tumor before advanced stages. We therefore used two-dimensional polyacrylamide gel electrophoresis (2-D PAGE) to study normal and tumor kidney tissues in ten patients suffering from RCC. A human kidney protein map in the SWISS-2DPAGE database accessible through the ExPASy WWW Molecular Biology Server was established. Of 2789 separated polypeptides, 43 were identified by gel comparison, amino acid analysis, N-terminal sequencing, and/or immunodetection. The comparison between normal and tumor kidney tissues showed four polypeptides to be absent in RCC. One of them was identified as ubiquinol cytochrome c reductase (UQCR), whose locus has elsewhere been tentatively assigned to chromosome 19p12 or chromosome 22. A second polypeptide was identified as mitochondrial NADH-ubiquinone oxidoreductase complex I whose locus is located on chromosome 18p11.2 and chromosome 19q13.3. These result suggest that the lack of UQCR and of mitochondrial NADH-ubiquinone oxidoreductase complex I expression in RCC may be caused by unknown deletions, or by changes in gene transcription or translation. It might indicate that mitochondrial disfunction plays a major role in RCC genesis or evolution.
C1 OSPED NIGUARDA CA GRANDA,CLIN CHEM & HEMATOL LAB,MILAN,ITALY.
   UNIV HOSP GENEVA,CLIN CHEM LAB,GENEVA,SWITZERLAND.
   UNIV GENEVA,DEPT BIOCHEM MED,GENEVA,SWITZERLAND.
   DESIO HOSP,DEPT UROL,DESIO,ITALY.
RP Sarto, C (corresponding author), UNIV DESIO,DEPT CLIN PATHOL,DESIO HOSP,VIA MAZZINI 1,I-20033 DESIO,MILAN,ITALY.
CR AUGLAND P, 1991, CANCER RES, V51, P1071
   BJELLQVIST B, 1993, ELECTROPHORESIS, V14, P1375, DOI 10.1002/elps.11501401212
   BJELLQVIST B, 1993, ELECTROPHORESIS, V14, P1357, DOI 10.1002/elps.11501401209
   BRADFORD MM, 1976, ANAL BIOCHEM, V72, P248, DOI 10.1016/0003-2697(76)90527-3
   CELIS JE, 1984, 2 DIMENSIONAL GEL EL, P3
   DELAHUNT B, 1995, CANCER, V75, P2714, DOI 10.1002/1097-0142(19950601)75:11<2714::AID-CNCR2820751113>3.0.CO;2-X
   DEVINE PL, 1993, CANCER BIOCHEM BIOPH, V13, P221
   DUNCAN AMV, 1994, GENOMICS, V21, P281, DOI 10.1006/geno.1994.1260
   ENDICOTT JA, 1989, ANNU REV BIOCHEM, V58, P137, DOI 10.1146/annurev.bi.58.070189.001033
   FAVORT RJ, 1991, INT J CANCER, V48, P502
   FRANZEN B, 1995, ELECTROPHORESIS, V16, P1087, DOI 10.1002/elps.11501601184
   GORG A, 1988, ELECTROPHORESIS, V9, P531, DOI 10.1002/elps.1150090913
   GOTTESMAN MM, 1993, ANNU REV BIOCHEM, V62, P385, DOI 10.1146/annurev.bi.62.070193.002125
   GRAVEL P, 1995, ELECTROPHORESIS, V16, P1152, DOI 10.1002/elps.11501601191
   GROSS AJ, 1994, CLIN INVESTIGATOR, V72, P337
   GUNTHERT U, 1995, CANCER SURV, V24, P19
   HEICAPPELL R, 1994, UROL RES, V22, P9, DOI 10.1007/BF00431542
   HERMAN JG, 1994, P NATL ACAD SCI USA, V91, P9700, DOI 10.1073/pnas.91.21.9700
   Hochstrasser D F, 1988, Appl Theor Electrophor, V1, P35
   HOCHSTRASSER DF, 1992, ELECTROPHORESIS, V13, P992, DOI 10.1002/elps.11501301201
   Hofmann R, 1996, J UROLOGY, V155, P858, DOI 10.1016/S0022-5347(01)66328-6
   HUGHES GJ, 1993, ELECTROPHORESIS, V14, P1216, DOI 10.1002/elps.11501401181
   Jin Yi, 1992, Applied and Theoretical Electrophoresis, V3, P85
   JOHNSON JP, 1989, P NATL ACAD SCI USA, V86, P641, DOI 10.1073/pnas.86.2.641
   KEESEE SK, 1994, P NATL ACAD SCI USA, V91, P1913, DOI 10.1073/pnas.91.5.1913
   KEYOMARSI K, 1994, CANCER RES, V54, P380
   KOVACS G, 1994, WORLD J UROL, V12, P64
   OAKLEY BR, 1980, ANAL BIOCHEM, V105, P361, DOI 10.1016/0003-2697(80)90470-4
   OKUZAWA K, 1994, ELECTROPHORESIS, V15, P382, DOI 10.1002/elps.1150150157
   PENNACCHIO LA, 1995, GENE, V155, P207, DOI 10.1016/0378-1119(94)00683-J
   PETERSEN RO, 1986, UROLOGIC PATHOLOGY, P69
   PINDER SE, 1994, J PATHOL, V174, P209, DOI 10.1002/path.1711740310
   RABILLOUD T, 1992, ELECTROPHORESIS, V13, P429, DOI 10.1002/elps.1150130190
   SANCHEZ JC, 1992, ELECTROPHORESIS, V13, P715, DOI 10.1002/elps.11501301151
   SANCHEZ JC, 1995, ELECTROPHORESIS, V16, P1131, DOI 10.1002/elps.11501601190
   SCHAPIRA AHV, 1988, LANCET, V8584, P500
   SUZUKI Y, 1992, JPN J CANCER RES, V83, P233, DOI 10.1111/j.1349-7006.1992.tb00091.x
   TALAMINI R, 1990, CANCER CAUSE CONTROL, V1, P125, DOI 10.1007/BF00053163
   Tannenbaum M, 1971, Pathol Annu, V6, P249
   TOMITA Y, 1995, INT J CANCER, V60, P753, DOI 10.1002/ijc.2910600604
   WALKER JE, 1992, J MOL BIOL, V226, P1051, DOI 10.1016/0022-2836(92)91052-Q
   Wilkins MR, 1996, BIO-TECHNOL, V14, P61, DOI 10.1038/nbt0196-61
NR 42
TC 118
Z9 131
U1 0
U2 4
PU VCH PUBLISHERS INC
PI DEERFIELD BEACH
PA 303 NW 12TH AVE, DEERFIELD BEACH, FL 33442-1788
SN 0173-0835
J9 ELECTROPHORESIS
JI Electrophoresis
PD MAR-APR
PY 1997
VL 18
IS 3-4
BP 599
EP 604
DI 10.1002/elps.1150180343
PG 6
WC Biochemical Research Methods; Chemistry, Analytical
WE Conference Proceedings Citation Index - Science (CPCI-S); Science Citation Index Expanded (SCI-EXPANDED)
SC Biochemistry & Molecular Biology; Chemistry
GA WW358
UT WOS:A1997WW35800042
PM 9150947
DA 2022-04-10
ER

PT J
AU Blixt, O
   Clo, E
   Nudelman, AS
   Sorensen, KK
   Clausen, T
   Wandall, HH
   Livingston, PO
   Clausen, H
   Jensen, KJ
AF Blixt, Ola
   Clo, Emiliano
   Nudelman, Aaron S.
   Sorensen, Kasper Kildegaard
   Clausen, Thomas
   Wandall, Hans H.
   Livingston, Philip O.
   Clausen, Henrik
   Jensen, Knud J.
TI A High-Throughput O-Glycopeptide Discovery Platform for Seromic
   Profiling
SO JOURNAL OF PROTEOME RESEARCH
LA English
DT Article
DE Glycopeptide; synthesis; chemoenzymatic; enzyme; microarray; glycan
   array; autoantibodies; post-translational modification
ID MUC1 TANDEM-REPEAT; N-ACETYLGALACTOSAMINYLTRANSFERASE; AUTOANTIBODY
   SIGNATURES; MONOCLONAL-ANTIBODIES; ANTIGENIC STRUCTURES; AMINO-ACIDS;
   T-N; CANCER; MICROARRAYS; PEPTIDE
AB Biomarker microarrays are becoming valuable tools for serological screening of disease-associated autoantibodies. post-translational modification (PTMs) such as glycosylation extend the range of protein function, and a variety of glycosylated proteins are known to be altered in disease progression. Here, we have developed a synthetic screening microarray platform for facile display of O-glycosylated peptides (O-PTMs). By introduction of a capping step during chemical solid-phase glycopeptide synthesis, selective enrichment of N-terminal glycopeptide end products was achieved on an amine-reactive hydrogel-coated microarray glass surface, allowing high-throughput display of large numbers of glycopeptides. Utilizing a repertoire of recombinant glycosyltransferases enabled further diversification of the array libraries in situ and display of a new level of potential biomarker candidates for serological screening. As proof-of-concept, we have demonstrated that MUC1 glycopeptides could be assembled and used to detect autoantibodies in vaccine-induced disease-free breast cancer patients and in patients with confirmed disease at time of diagnosis.
C1 [Blixt, Ola; Clo, Emiliano; Nudelman, Aaron S.; Clausen, Thomas; Wandall, Hans H.; Clausen, Henrik] Univ Copenhagen, Dept Cellular & Mol Med, Copenhagen Ctr Glyc, DK-2200 Copenhagen N, Denmark.
   [Livingston, Philip O.] Mem Sloan Kettering Canc Ctr, Dept Med Melanoma & Sarcoma Serv, New York, NY 10021 USA.
   [Sorensen, Kasper Kildegaard; Jensen, Knud J.] Univ Copenhagen, Dept Basic Sci & Environm Bioorgan Chem, DK-2200 Copenhagen N, Denmark.
RP Blixt, O (corresponding author), Univ Copenhagen, Dept Cellular & Mol Med, Copenhagen Ctr Glyc, Blegdamsvej 3B, DK-2200 Copenhagen N, Denmark.
EM olablixt@sund.ku.dk
RI clausen, henrik/AAD-8016-2021; Jensen, Knud J/D-1145-2016
OI Jensen, Knud J/0000-0003-3525-5452; Clausen, Henrik/0000-0002-0915-5055;
   Wandall, Hans H./0000-0003-0240-9232; Blixt, Ola/0000-0003-4143-6276
FU Carlsberg FoundationCarlsberg Foundation; Benzon Foundation; Velux
   FoundationVelux Fonden; Danish Research CouncilsDet Frie Forskningsrad
   (DFF); Danish Agency for Science, Technology and Innovation; NIHUnited
   States Department of Health & Human ServicesNational Institutes of
   Health (NIH) - USA [PO1 CA 052477, 1U01CA128437-01]; EUEuropean
   Commission [FP7-HEALTH-2007-A 201381]; University of Copenhagen;
   NATIONAL CANCER INSTITUTEUnited States Department of Health & Human
   ServicesNational Institutes of Health (NIH) - USANIH National Cancer
   Institute (NCI) [P01CA052477, U01CA128437] Funding Source: NIH RePORTER
FX The authors thank Mrs Susanne Johannesen for excellent technical
   support. This work was supported by The Carlsberg Foundation, The Benzon
   Foundation, The Velux Foundation, The Danish Research Councils, Danish
   Agency for Science, Technology and Innovation (FTP), NIH Grant PO1 CA
   052477, NIH (Grant 1U01CA128437-01), EU FP7-HEALTH-2007-A 201381, and
   University of Copenhagen Programme of Excellence.
CR Bennett EP, 1998, J BIOL CHEM, V273, P30472, DOI 10.1074/jbc.273.46.30472
   Bennett EP, 1999, J BIOL CHEM, V274, P25362, DOI 10.1074/jbc.274.36.25362
   Blixt O, 2004, P NATL ACAD SCI USA, V101, P17033, DOI 10.1073/pnas.0407902101
   Blixt O, 2009, AM J TRANSPLANT, V9, P83, DOI 10.1111/j.1600-6143.2008.02471.x
   Blixt O, 1998, J ORG CHEM, V63, P2705, DOI 10.1021/jo980074h
   Blixt O, 2008, GLYCOCONJUGATE J, V25, P59, DOI 10.1007/s10719-007-9062-z
   Blixt O, 2008, GLYCOCONJUGATE J, V25, P27, DOI 10.1007/s10719-007-9045-0
   Brocke C, 2002, BIOORGAN MED CHEM, V10, P3085, DOI 10.1016/S0968-0896(02)00135-9
   Brockhausen I, 1999, BBA-GEN SUBJECTS, V1473, P67, DOI 10.1016/S0304-4165(99)00170-1
   Brockhausen I, 1996, GLYCOCONJUGATE J, V13, P849, DOI 10.1007/BF00702349
   Clausen H, 1996, GLYCOBIOLOGY, V6, P635, DOI 10.1093/glycob/6.6.635
   Coenen D, 2007, CLIN CHEM, V53, P498, DOI 10.1373/clinchem.2006.078063
   Danielczyk A, 2006, CANCER IMMUNOL IMMUN, V55, P1337, DOI 10.1007/s00262-006-0135-9
   DeFrees S, 2006, GLYCOBIOLOGY, V16, P833, DOI 10.1093/glycob/cwl004
   Desmetz C, 2009, J PROTEOMICS, V72, P982, DOI 10.1016/j.jprot.2009.06.004
   Desmetz C, 2009, EXPERT REV PROTEOMIC, V6, P377, DOI 10.1586/EPR.09.56
   Hakomori S, 2002, P NATL ACAD SCI USA, V99, P10231, DOI 10.1073/pnas.172380699
   Hassan H, 2000, J BIOL CHEM, V275, P38197, DOI 10.1074/jbc.M005783200
   Hiki Y, 2009, CLIN EXP NEPHROL, V13, P415, DOI 10.1007/s10157-009-0173-7
   Kihlberg J, 1997, METHOD ENZYMOL, V289, P221
   KJELDSEN T, 1988, CANCER RES, V48, P2214
   Klich G, 1997, CARBOHYD RES, V299, P33, DOI 10.1016/S0008-6215(96)00337-0
   Kohn M, 2009, J PEPT SCI, V15, P393, DOI 10.1002/psc.1130
   Krueger KE, 2006, MOL CELL PROTEOMICS, V5, P1799, DOI 10.1074/mcp.R600009-MCP200
   Laurent N, 2008, CHEMBIOCHEM, V9, P2592, DOI 10.1002/cbic.200800481
   Miwa HE, 2010, J BIOL CHEM, V285, P1208, DOI 10.1074/jbc.M109.035436
   Ohyabu N, 2009, J AM CHEM SOC, V131, P17102, DOI 10.1021/ja903361f
   Oyelaran O, 2009, J PROTEOME RES, V8, P3529, DOI 10.1021/pr9002245
   PAULSEN H, 1982, CARBOHYD RES, V109, P89, DOI 10.1016/0008-6215(82)84033-0
   PAULSEN H, 1995, CARBOHYD RES, V268, P17, DOI 10.1016/0008-6215(94)00292-N
   Price MR, 1998, TUMOR BIOL, V19, P1, DOI 10.1159/000056500
   Ramachandran Niroshan, 2006, V328, P1
   Reis CA, 1998, GLYCOCONJUGATE J, V15, P51, DOI 10.1023/A:1006939432665
   Reuschenbach M, 2009, CANCER IMMUNOL IMMUN, V58, P1535, DOI 10.1007/s00262-009-0733-4
   Robinson WH, 2002, NAT MED, V8, P295, DOI 10.1038/nm0302-295
   Rychlewski L, 2004, J MOL BIOL, V336, P307, DOI 10.1016/j.jmb.2003.12.052
   Sabbatini PJ, 2007, CLIN CANCER RES, V13, P4170, DOI 10.1158/1078-0432.CCR-06-2949
   Schietinger A, 2006, SCIENCE, V314, P304, DOI 10.1126/science.1129200
   Schwientek T, 2002, J BIOL CHEM, V277, P22623, DOI 10.1074/jbc.M202684200
   Smorodin EP, 2001, EXP ONCOL, V23, P109
   Sorensen AL, 2006, GLYCOBIOLOGY, V16, P96, DOI 10.1093/glycob/cwj044
   Springer GF, 1997, J MOL MED, V75, P594, DOI 10.1007/s001090050144
   Tainsky MA, 2009, BBA-REV CANCER, V1796, P176, DOI 10.1016/j.bbcan.2009.04.004
   Tan EM, 2008, IMMUNOL REV, V222, P328, DOI 10.1111/j.1600-065X.2008.00611.x
   Tarp MA, 2007, GLYCOBIOLOGY, V17, P197, DOI 10.1093/glycob/cwl061
   Taylor-Papadimitriou J, 2002, J MAMMARY GLAND BIOL, V7, P209, DOI 10.1023/A:1020360121451
   Uttamchandani M, 2008, CURR PHARM DESIGN, V14, P2428, DOI 10.2174/138161208785777450
   von Mensdorff-Pouilly S, 2000, INT J CANCER, V86, P702, DOI 10.1002/(SICI)1097-0215(20000601)86:5<702::AID-IJC16>3.0.CO;2-1
   Wandall HH, 2010, CANCER RES, V70, P1306, DOI 10.1158/0008-5472.CAN-09-2893
   Wandall HH, 1997, J BIOL CHEM, V272, P23503, DOI 10.1074/jbc.272.38.23503
   Westerlind U, 2009, ANGEW CHEM INT EDIT, V48, P8263, DOI 10.1002/anie.200902963
NR 52
TC 74
Z9 75
U1 0
U2 44
PU AMER CHEMICAL SOC
PI WASHINGTON
PA 1155 16TH ST, NW, WASHINGTON, DC 20036 USA
SN 1535-3893
J9 J PROTEOME RES
JI J. Proteome Res.
PD OCT
PY 2010
VL 9
IS 10
BP 5250
EP 5261
DI 10.1021/pr1005229
PG 12
WC Biochemical Research Methods
WE Science Citation Index Expanded (SCI-EXPANDED)
SC Biochemistry & Molecular Biology
GA 655NX
UT WOS:000282257800035
PM 20726594
OA Green Accepted
DA 2022-04-10
ER

PT J
AU Dang, XB
   Singh, A
   Spetman, BD
   Nolan, KD
   Isaacs, JS
   Dennis, JH
   Dalton, S
   Marshall, AG
   Young, NL
AF Dang, Xibei
   Singh, Amar
   Spetman, Brian D.
   Nolan, Krystal D.
   Isaacs, Jennifer S.
   Dennis, Jonathan H.
   Dalton, Stephen
   Marshall, Alan G.
   Young, Nicolas L.
TI Label-Free Relative Quantitation of Isobaric and Isomeric Human Histone
   H2A and H2B Variants by Fourier Transform Ion Cyclotron Resonance
   Top-Down MS/MS
SO JOURNAL OF PROTEOME RESEARCH
LA English
DT Article
DE FT-ICR; FTMS; proteoform; histone; post-translational modification;
   sequence variants
ID ELECTRON-CAPTURE DISSOCIATION; MASS-SPECTROMETRY; MAMMALIAN DEVELOPMENT;
   DNA-REPLICATION; prostate cancer; GENE-REGULATION; SECRETED HSP90;
   CHROMATIN; PROTEOMICS; PHOSPHORYLATION
AB Histone variants are known to play a central role in genome regulation and maintenance. However, many variants are inaccessible by antibody-based methods or bottom-up tandem mass spectrometry due to their highly similar sequences. For many, the only tractable approach is with intact protein top-down tandem mass spectrometry. Here, ultra-high-resolution FT-ICR MS and MS/MS yield quantitative relative abundances of all detected HeLa H2A and H2B isobaric and isomeric variants with a label-free approach. We extend the analysis to identify and relatively quantitate 16 proteoforms from 12 sequence variants of histone H2A and 10 proteoforms of histone H2B from three other cell lines: human embryonic stem cells (WA09), U937, and a prostate cancer cell line LaZ. The top-down MS/MS approach provides a path forward for more extensive elucidation of the biological role of many previously unstudied histone variants and post-translational modification.
C1 [Dang, Xibei; Marshall, Alan G.] Florida State Univ, Dept Chem & Biochem, 95 Chieftain Way, Tallahassee, FL 32306 USA.
   [Singh, Amar; Dalton, Stephen] Univ Georgia, Dept Biochem & Mol Biol, 724 Biol Sci Bldg, Athens, GA 30602 USA.
   [Spetman, Brian D.; Dennis, Jonathan H.] Florida State Univ, Dept Biol Sci, 319 Stadium Dr, Tallahassee, FL 32306 USA.
   [Nolan, Krystal D.; Isaacs, Jennifer S.] Med Univ South Carolina, Cell & Mol Pharmacol & Expt Therapeut, 173 Ashley Ave, Charleston, SC 29425 USA.
   [Marshall, Alan G.; Young, Nicolas L.] Natl High Magnet Field Lab, Ion Cyclotron Resonance Program, 1800 East Paul Dirac Dr, Tallahassee, FL 32310 USA.
   [Young, Nicolas L.] Baylor Coll Med, Verna & Marrs McLean Dept Biochem & Mol Biol, One Baylor Plaza, Houston, TX 77030 USA.
RP Young, NL (corresponding author), Natl High Magnet Field Lab, Ion Cyclotron Resonance Program, 1800 East Paul Dirac Dr, Tallahassee, FL 32310 USA.; Young, NL (corresponding author), Baylor Coll Med, Verna & Marrs McLean Dept Biochem & Mol Biol, One Baylor Plaza, Houston, TX 77030 USA.
EM nicolas.young@bcm.edu
OI Young, Nicolas/0000-0002-3323-2815; Dalton, Stephen/0000-0002-3450-1263
FU NSF Division of Materials ResearchNational Science Foundation (NSF)
   [DMR-06-54118]; NIH General Medical SciencesUnited States Department of
   Health & Human ServicesNational Institutes of Health (NIH) - USANIH
   National Institute of General Medical Sciences (NIGMS) [P01GM85354];
   State of Florida; NATIONAL INSTITUTE OF GENERAL MEDICAL SCIENCESUnited
   States Department of Health & Human ServicesNational Institutes of
   Health (NIH) - USANIH National Institute of General Medical Sciences
   (NIGMS) [P01GM085354] Funding Source: NIH RePORTER
FX This work was supported by NSF Division of Materials Research through
   DMR-06-54118, NIH General Medical Sciences through P01GM85354, and the
   State of Florida.
CR Anderson L. C., 2016, SAN C CHAR PROT THER
   Anderson LC, 2016, MOL CELL PROTEOMICS, V15, P975, DOI 10.1074/mcp.O115.053843
   Angel TE, 2012, CHEM SOC REV, V41, P3912, DOI 10.1039/c2cs15331a
   Banaszynski LA, 2010, DEV CELL, V19, P662, DOI 10.1016/j.devcel.2010.10.014
   Bannister AJ, 2011, CELL RES, V21, P381, DOI 10.1038/cr.2011.22
   Biel M, 2005, ANGEW CHEM INT EDIT, V44, P3186, DOI 10.1002/anie.200461346
   Bonisch C, 2012, NUCLEIC ACIDS RES, V40, P10719, DOI 10.1093/nar/gks865
   Boyne MT, 2006, J PROTEOME RES, V5, P248, DOI 10.1021/pr050269n
   Catherman AD, 2014, BIOCHEM BIOPH RES CO, V445, P683, DOI 10.1016/j.bbrc.2014.02.041
   Dang XB, 2014, PROTEOMICS, V14, P1130, DOI 10.1002/pmic.201300438
   Fischle W, 2005, NATURE, V438, P1116, DOI 10.1038/nature04219
   Groth A, 2007, CELL, V128, P721, DOI 10.1016/j.cell.2007.01.030
   Guan SH, 1996, INT J MASS SPECTROM, V157, P5, DOI 10.1016/S0168-1176(96)04461-8
   Hance MW, 2012, J BIOL CHEM, V287, DOI 10.1074/jbc.M112.389015
   Jenuwein T., 2001, CURR OPIN GENE DEV, V293, P1074
   Kaiser NK, 2011, J AM SOC MASS SPECTR, V22, P1343, DOI 10.1007/s13361-011-0141-9
   Kalli A, 2013, ANAL CHEM, V85, P3501, DOI 10.1021/ac303103b
   Kimura H, 2001, J CELL BIOL, V153, P1341, DOI 10.1083/jcb.153.7.1341
   LEDFORD EB, 1984, ANAL CHEM, V56, P2744, DOI 10.1021/ac00278a027
   Liu CG, 2013, CANCER LETT, V339, P60, DOI 10.1016/j.canlet.2013.07.022
   Mahajan K, 2012, NAT STRUCT MOL BIOL, V19, P930, DOI 10.1038/nsmb.2356
   Maze I, 2014, NAT REV GENET, V15, P259, DOI 10.1038/nrg3673
   Molden RC, 2015, EPIGENET CHROMATIN, V8, DOI 10.1186/s13072-015-0006-8
   Nolan KD, 2015, J BIOL CHEM, V290, P8271, DOI 10.1074/jbc.M115.637496
   Reik W, 2007, NATURE, V447, P425, DOI 10.1038/nature05918
   Santoro SW, 2012, ELIFE, V1, DOI 10.7554/eLife.00070
   Shi SDH, 2000, INT J MASS SPECTROM, V195, P591, DOI 10.1016/S1387-3806(99)00226-2
   Singh AM, 2016, METHODS, V101, P4, DOI 10.1016/j.ymeth.2015.09.020
   Singh AM, 2013, STEM CELL REP, V1, P532, DOI 10.1016/j.stemcr.2013.10.009
   Siuti N, 2006, J PROTEOME RES, V5, P233, DOI 10.1021/pr050268v
   Smith LM, 2013, NAT METHODS, V10, P186, DOI 10.1038/nmeth.2369
   Tafrova JI, 2014, MOL CELL BIOCHEM, V392, P259, DOI 10.1007/s11010-014-2036-0
   Tessarz P, 2014, NATURE, V505, P564, DOI 10.1038/nature12819
   Xu M, 2010, SCIENCE, V328, P94, DOI 10.1126/science.1178994
   Zhang Y, 2004, J BIOL CHEM, V279, P21866, DOI 10.1074/jbc.M400099200
   Zhau HYE, 1996, P NATL ACAD SCI USA, V93, P15152, DOI 10.1073/pnas.93.26.15152
NR 36
TC 19
Z9 19
U1 0
U2 28
PU AMER CHEMICAL SOC
PI WASHINGTON
PA 1155 16TH ST, NW, WASHINGTON, DC 20036 USA
SN 1535-3893
EI 1535-3907
J9 J PROTEOME RES
JI J. Proteome Res.
PD SEP
PY 2016
VL 15
IS 9
BP 3196
EP 3203
DI 10.1021/acs.jproteome.6b00414
PG 8
WC Biochemical Research Methods
WE Science Citation Index Expanded (SCI-EXPANDED)
SC Biochemistry & Molecular Biology
GA DV1WR
UT WOS:000382713300025
PM 27431976
OA Green Accepted
DA 2022-04-10
ER

PT J
AU Nie, Q
   Gong, XD
   Liu, M
   Li, DWC
AF Nie, Q.
   Gong, X. -D.
   Liu, M.
   Li, D. W. -C.
TI Effects of Crosstalks Between Sumoylation and Phosphorylation in Normal
   Cellular Physiology and Human Diseases
SO CURRENT MOLECULAR MEDICINE
LA English
DT Review
DE PTM; phosphorylation; sumoylation; protein functions
ID PROTEIN-PHOSPHORYLATION; DEPENDENT SUMOYLATION; sumoylationMODIFICATION;
   KINASE HASPIN; CANCER-CELLS; E3 LIGASE; UBIQUITIN; PATHWAY; STRESS; P53
AB post-translational modification (PTMs) such as phosphorylation, acetylation, methylation, ubiquitination, sumoylation are important mechanisms to regulate functions of different proteins. Among various PTMs, phosphorylation, discovered about 60 years ago, is probably the most common modification. In contrast, sumoylation, identified about two decades ago is emerging as a key regulatory mechanism modulating protein functions. Although studies on protein phosphorylation and sumoylation have been extensively reviewed, much less attention has been paid to their cross-talk and their co-regulation of the same protein target. Here we summarize various examples of the cross-talks between protein phosphorylation and sumoylation, and discuss their functions in regulating normal physiology and pathogenesis.
C1 [Nie, Q.; Gong, X. -D.; Li, D. W. -C.] Sun Yat Sen Univ, State Key Lab Ophthalmol, Zhongshan Ophthalm Ctr, Xianlie Rd 54, Guangzhou 510060, Guangdong, Peoples R China.
   [Liu, M.] China Univ Geosci, Key Lab Mol Biophys, Minist Educ, Coll Life Sci & Technol,Ctr Human Genome Res, Wuhan 430074, Peoples R China.
RP Li, DWC (corresponding author), Sun Yat Sen Univ, State Key Lab Ophthamol, Zhongshan Ophthalm Ctr, 54 Xianlie South Rd, Guangzhou 510060, Guangdong, Peoples R China.
EM dwli1688@hotmail.com
RI Li, David/AAN-9205-2021
FU National Natural Science Foundation of ChinaNational Natural Science
   Foundation of China (NSFC) [81570824]; fundamental research funds from
   the State Key Laboratory of Ophthalmology in Zhongshan Ophthalmic Center
   of the Sun Yat-sen University
FX This work was supported by the grant (No. 81570824) from the National
   Natural Science Foundation of China, and the fundamental research funds
   from the State Key Laboratory of Ophthalmology in Zhongshan Ophthalmic
   Center of the Sun Yat-sen University.
CR Anamika, 2016, J BIOL CHEM, V291, P4417, DOI 10.1074/jbc.M115.705061
   Belletti B, 2005, CURR MED CHEM, V12, P1589, DOI 10.2174/0929867054367149
   Bennett RL, 2012, CELL CYCLE, V11, P407, DOI 10.4161/cc.11.2.18999
   Bergink S, 2009, NATURE, V458, P461, DOI 10.1038/nature07963
   Bies J, 2013, J BIOL CHEM, V288, P36983, DOI 10.1074/jbc.M113.500264
   Chamberlain SEL, 2012, NAT NEUROSCI, V15, P845, DOI 10.1038/nn.3089
   Chang E, 2011, BLOOD, V117, P2527, DOI 10.1182/blood-2010-08-302281
   Chen C, 2015, NAT COMMUN, V6, DOI 10.1038/ncomms9899
   Chen YC, 2014, J NEUROSCI, V34, P9574, DOI 10.1523/JNEUROSCI.4302-13.2014
   Choi JH, 2016, NEUROPHARMACOLOGY, V102, P229, DOI 10.1016/j.neuropharm.2015.11.021
   Cohen P, 2002, NAT CELL BIOL, V4, pE127, DOI 10.1038/ncb0502-e127
   Dai J, 2005, GENE DEV, V19, P472, DOI 10.1101/gad.1267105
   Daniel AR, 2007, MOL ENDOCRINOL, V21, P2890, DOI 10.1210/me.2007-0248
   de la Cruz-Herrera CF, 2015, ONCOGENE, V34, P1442, DOI 10.1038/onc.2014.48
   Dimitrova V, 2015, CURR MOL MED, V15, P82, DOI 10.2174/1566524015666150114115427
   FISCHER EH, 1955, J BIOL CHEM, V216, P121
   Gareau JR, 2010, NAT REV MOL CELL BIO, V11, P861, DOI 10.1038/nrm3011
   Gartel AL, 2002, MOL CANCER THER, V1, P639
   Geiss-Friedlander R, 2007, NAT REV MOL CELL BIO, V8, P947, DOI 10.1038/nrm2293
   Gu Y, 2015, ONCOTARGET, V6, P15111, DOI 10.18632/oncotarget.3615
   Hashimoto R, 2015, CURR MOL MED, V15, P168, DOI 10.2174/1566524015666150303104159
   Hendriks IA, 2016, NAT REV MOL CELL BIO, V17, P581, DOI 10.1038/nrm.2016.81
   Hietakangas V, 2006, P NATL ACAD SCI USA, V103, P45, DOI 10.1073/pnas.0503698102
   Ho J, 2015, METHODS, V77-78, P104, DOI 10.1016/j.ymeth.2015.01.006
   Huang C, 2009, EMBO J, V28, P2748, DOI 10.1038/emboj.2009.210
   Humphrey SJ, 2015, TRENDS ENDOCRIN MET, V26, P676, DOI 10.1016/j.tem.2015.09.013
   Huot J, 1998, J CELL BIOL, V143, P1361, DOI 10.1083/jcb.143.5.1361
   HYMAN C, 1991, NATURE, V350, P230, DOI 10.1038/350230a0
   Kahyo T, 2001, MOL CELL, V8, P713, DOI 10.1016/S1097-2765(01)00349-5
   Kaikkonen S, 2010, BBA-GENE REGUL MECH, V1799, P555, DOI 10.1016/j.bbagrm.2010.07.001
   Kerscher O, 2006, ANNU REV CELL DEV BI, V22, P159, DOI 10.1146/annurev.cellbio.22.010605.093503
   Khan M, 2014, NAT COMMUN, V5, DOI 10.1038/ncomms5687
   Knutson TP, 2012, BREAST CANCER RES, V14, DOI 10.1186/bcr3211
   Konopacki FA, 2011, P NATL ACAD SCI USA, V108, P19772, DOI 10.1073/pnas.1111575108
   Landry J, 1999, BIOCHEM SOC SYMP, P79
   Li W, 2014, CURR MOL MED, V14, P185, DOI 10.2174/1566524013666131203103147
   Li X, 2007, J BIOL CHEM, V282, P36177, DOI 10.1074/jbc.M706912200
   Li X, 2010, SCI SIGNAL, V3, DOI 10.1126/scisignal.2000781
   Lin C, 2016, ONCOGENE, V35, P595, DOI 10.1038/onc.2015.115
   Loriol C, 2014, NAT COMMUN, V5, DOI 10.1038/ncomms6113
   Loughery J, 2014, NUCLEIC ACIDS RES, V42, P7664, DOI 10.1093/nar/gku501
   Lovisa S, 2016, J MOL CELL BIOL, V8, P17, DOI 10.1093/jmcb/mjv056
   Luo HB, 2014, P NATL ACAD SCI USA, V111, P16586, DOI 10.1073/pnas.1417548111
   Maarifi G, 2015, J IMMUNOL, V195, P2312, DOI 10.4049/jimmunol.1500035
   Manning G, 2002, SCIENCE, V298, P1912, DOI 10.1126/science.1075762
   Matunis MJ, 1996, J CELL BIOL, V135, P1457, DOI 10.1083/jcb.135.6.1457
   Meng FX, 2016, CELL CYCLE, V15, P1724, DOI 10.1080/15384101.2016.1182267
   Muller S, 2008, CELL CYCLE, V7, P754, DOI 10.4161/cc.7.6.5495
   Nacmias B, 2014, CURR MOL MED, V14, P993, DOI 10.2174/1566524014666141010152143
   Pennella MA, 2010, J VIROL, V84, P12210, DOI 10.1128/JVI.01442-10
   Petrucci S, 2014, CURR MOL MED, V14, P1079, DOI 10.2174/1566524014666141010155509
   Picard N, 2012, MOL CELL BIOL, V32, P2709, DOI 10.1128/MCB.06624-11
   Qi Q, 2014, ONCOGENE, V33, P4893, DOI 10.1038/onc.2013.438
   Ramsay RG, 2008, NAT REV CANCER, V8, P523, DOI 10.1038/nrc2439
   Reinhardt HC, 2013, NAT REV MOL CELL BIO, V14, P563, DOI 10.1038/nrm3640
   Reinhardt HC, 2009, CURR OPIN CELL BIOL, V21, P245, DOI 10.1016/j.ceb.2009.01.018
   Risso G, 2013, CELL CYCLE, V12, P3165, DOI 10.4161/cc.26183
   Ruvolo PP, 2001, LEUKEMIA, V15, P515, DOI 10.1038/sj.leu.2402090
   Saha S, 2014, METHODS, V65, P201, DOI 10.1016/j.ymeth.2013.09.012
   Satpathy S, 2014, CARCINOGENESIS, V35, P2214, DOI 10.1093/carcin/bgu126
   Shahpasandzadeh H, 2014, J BIOL CHEM, V289, P31224, DOI 10.1074/jbc.M114.559237
   Sheu YJ, 2006, MOL CELL, V24, P101, DOI 10.1016/j.molcel.2006.07.033
   Siafakas AR, 2009, INT J BIOCHEM CELL B, V41, P986, DOI 10.1016/j.biocel.2008.06.018
   Su YF, 2012, PLOS ONE, V7, DOI 10.1371/journal.pone.0044608
   Su YF, 2012, PLOS ONE, V7, DOI 10.1371/journal.pone.0034250
   Sun HB, 2015, BIOCHEM BIOPH RES CO, V463, P377, DOI 10.1016/j.bbrc.2015.04.152
   Sun Y, 2015, ONCOGENE, V34, P2527, DOI 10.1038/onc.2014.179
   Tai DJC, 2016, NAT COMMUN, V7, DOI 10.1038/ncomms10552
   Tamura Y, 2004, FEBS LETT, V569, P249, DOI 10.1016/j.febslet.2004.06.003
   Tan K, 2014, CURR MOL MED, V14, P652, DOI 10.2174/1566524014666140603115314
   Tarrant MK, 2009, ANNU REV BIOCHEM, V78, P797, DOI 10.1146/annurev.biochem.78.070907.103047
   Tremblay AM, 2008, MOL ENDOCRINOL, V22, P570, DOI 10.1210/me.2007-0357
   Vanhatupa S, 2008, BIOCHEM J, V409, P179, DOI 10.1042/BJ20070620
   Vu EH, 2007, BIOCHEMISTRY-US, V46, P9795, DOI 10.1021/bi700316g
   Wei L, 2016, NAT STRUCT MOL BIOL, V23, P209, DOI 10.1038/nsmb.3173
   Wimmer P, 2013, ONCOGENE, V32, P1626, DOI 10.1038/onc.2012.187
   Witty J, 2010, BIOCHEM J, V428, P247, DOI 10.1042/BJ20091948
   Yang WH, 2009, MOL CELL BIOL, V29, P613, DOI 10.1128/MCB.00295-08
   Yao Q, 2014, J BIOL CHEM, V289, P12666, DOI 10.1074/jbc.M113.546481
   Yao Q, 2011, J BIOL CHEM, V286, P27342, DOI 10.1074/jbc.M111.220848
   Yoshida MM, 2016, J CELL BIOL, V213, P665, DOI 10.1083/jcb.201511079
   Zhang JL, 2015, J BIOL CHEM, V290, P3708, DOI 10.1074/jbc.M114.634386
   Zhang LJ, 2012, J BIOL CHEM, V287, P26971, DOI 10.1074/jbc.M112.344176
   Zhang P, 2015, CURR MOL MED, V15, P780, DOI 10.2174/1566524015666150824143830
   Zhou Z, 2016, ONCOGENE, V35, P5826, DOI 10.1038/onc.2016.124
   Zhu CH, 2015, NUCLEIC ACIDS RES, V43, P7945, DOI 10.1093/nar/gkv741
NR 86
TC 14
Z9 15
U1 0
U2 20
PU BENTHAM SCIENCE PUBL LTD
PI SHARJAH
PA EXECUTIVE STE Y-2, PO BOX 7917, SAIF ZONE, 1200 BR SHARJAH, U ARAB
   EMIRATES
SN 1566-5240
EI 1875-5666
J9 CURR MOL MED
JI Curr. Mol. Med.
PY 2016
VL 16
IS 10
BP 906
EP 913
DI 10.2174/1566524016666161223105555
PG 8
WC Medicine, Research & Experimental
WE Science Citation Index Expanded (SCI-EXPANDED)
SC Research & Experimental Medicine
GA EP0ZB
UT WOS:000397114100008
PM 28017137
DA 2022-04-10
ER

PT J
AU Anglani, R
   Creanza, TM
   Liuzzi, VC
   Piepoli, A
   Panza, A
   Andriulli, A
   Ancona, N
AF Anglani, Roberto
   Creanza, Teresa M.
   Liuzzi, Vania C.
   Piepoli, Ada
   Panza, Anna
   Andriulli, Angelo
   Ancona, Nicola
TI Loss of Connectivity in Cancer Co-Expression Networks
SO PLOS ONE
LA English
DT Article
ID MOLECULAR-ORIGINS; TUMOR-SUPPRESSOR; MICROARRAY DATA; GENE; EXPRESSION;
   MUTATIONS; PATHWAYS; BREAST; SET; CELLS
AB Differential gene expression profiling studies have lead to the identification of several disease biomarkers. However, the oncogenic alterations in coding regions can modify the gene functions without affecting their own expression profiles. Moreover, post-translational modification can modify the activity of the coded protein without altering the expression levels of the coding gene, but eliciting variations to the expression levels of the regulated genes. These considerations motivate the study of the rewiring of networks co-expressed genes as a consequence of the aforementioned alterations in order to complement the informative content of differential expression. We analyzed 339 mRNAomes of five distinct cancer types to find single genes that presented co-expression patterns strongly differentiated between normal and tumor phenotypes. Our analysis of differentially connected genes indicates the loss of connectivity as a common topological trait of cancer networks, and unveils novel candidate cancer genes. Moreover, our integrated approach that combines the differential expression together with the differential connectivity improves the classic enrichment pathway analysis providing novel insights on putative cancer gene biosystems not still fully investigated.
C1 [Anglani, Roberto; Creanza, Teresa M.; Liuzzi, Vania C.; Ancona, Nicola] CNR ISSIA, Inst Intelligent Syst Automat, Natl Res Council, Bari, Italy.
   [Creanza, Teresa M.] Univ Turin, Ctr Complex Syst Mol Biol & Med, Turin, Italy.
   [Piepoli, Ada; Panza, Anna; Andriulli, Angelo] IRCCS Casa Sollievo Sofferenza, Dept Med Sci, Div & Lab Gastroenterol, San Giovanni Rotondo, Italy.
RP Ancona, N (corresponding author), CNR ISSIA, Inst Intelligent Syst Automat, Natl Res Council, Bari, Italy.
EM ancona@ba.issia.cnr.it
RI Ancona, Nicola/AAD-4772-2022; Panza, Anna/K-1989-2016; CREANZA, TERESA
   MARIA/AAX-6584-2020; Piepoli, Ada/K-9299-2016; Andriulli,
   Angelo/B-5027-2017; Ancona, Nicola/E-9971-2013
OI Panza, Anna/0000-0001-5840-0849; CREANZA, TERESA
   MARIA/0000-0003-4926-6451; Piepoli, Ada/0000-0001-7487-8754; Andriulli,
   Angelo/0000-0001-8862-7083; Anglani, Roberto/0000-0002-7175-5991;
   Ancona, Nicola/0000-0003-0065-0321
FU Regione Puglia PO FESR Progetto BISIMANE [44]; Progetto FIRBMinistry of
   Education, Universities and Research (MIUR)Fund for Investment in Basic
   Research (FIRB) [RBAP11B2SX]; Progetto di Ricerca FinalizzataMinistry of
   Health, ItalyMinistry of Health Italy - Ricerca Finalizzata (MOH-RF)
   [RF/2009-1471624]
FX This work was partially supported by grants from Regione Puglia PO FESR
   2007--2013 Progetto BISIMANE (Cod. n. 44), Progetto FIRB RBAP11B2SX,
   Progetto di Ricerca Finalizzata 2009 RF/2009-1471624. The funders had no
   role in study design, data collection and analysis, decision to publish,
   or preparation of the manuscript.
CR Abatangelo L, 2009, BMC BIOINFORMATICS, V10, DOI 10.1186/1471-2105-10-275
   Bandyopadhyay S, 2010, SCIENCE, V330, P1385, DOI 10.1126/science.1195618
   Barabasi AL, 2004, NAT REV GENET, V5, P101, DOI 10.1038/nrg1272
   BENJAMINI Y, 1995, J R STAT SOC B, V57, P289, DOI 10.1111/j.2517-6161.1995.tb02031.x
   Benz CC, 1998, ENDOCR-RELAT CANCER, V5, P271, DOI 10.1677/erc.0.0050271
   Califano A, 2011, MOL SYST BIOL, V7, DOI 10.1038/msb.2010.117
   Chang JT, 2006, BIOINFORMATICS, V22, P2926, DOI 10.1093/bioinformatics/btl483
   Chen LM, 2011, J CELL BIOCHEM, V112, P933, DOI 10.1002/jcb.23009
   Cheng XX, 2005, CANCER LETT, V223, P339, DOI 10.1016/j.canlet.2004.11.013
   Choi JK, 2005, BIOINFORMATICS, V21, P4348, DOI 10.1093/bioinformatics/bti722
   de la Fuente A, 2010, TRENDS GENET, V26, P326, DOI 10.1016/j.tig.2010.05.001
   Ding L, 2008, NATURE, V455, P1069, DOI 10.1038/nature07423
   Dorsam RT, 2007, NAT REV CANCER, V7, P79, DOI 10.1038/nrc2069
   Dunn GP, 2006, NAT REV IMMUNOL, V6, P836, DOI 10.1038/nri1961
   Fearnhead NS, 2001, HUM MOL GENET, V10, P721, DOI 10.1093/hmg/10.7.721
   Fearon ER, 1999, CURR BIOL, V9, pR62, DOI 10.1016/S0960-9822(99)80012-8
   Futreal PA, 2004, NAT REV CANCER, V4, P177, DOI 10.1038/nrc1299
   Giaccone G, 2008, ANN ONCOL, V19, P1219, DOI 10.1093/annonc/mdn048
   Good P. I., 2000, SPRINGER SERIES STAT
   Grutzmann R, 2005, ONCOGENE, V24, P5079, DOI 10.1038/sj.onc.1208696
   Hamosh A, 2005, NUCLEIC ACIDS RES, V33, pD514
   Hanahan D, 2011, CELL, V144, P646, DOI 10.1016/j.cell.2011.02.013
   Herbst RS, 2008, NEW ENGL J MED, V359, P1367, DOI 10.1056/NEJMra0802714
   Hollander M., 1999, WILEY SERIES PROBABI
   Hudson NJ, 2009, PLOS COMPUT BIOL, V5, DOI 10.1371/journal.pcbi.1000382
   Ideker T, 2012, MOL SYST BIOL, V8, DOI 10.1038/msb.2011.99
   James RG, 2009, SCI SIGNAL, V2, DOI 10.1126/scisignal.2000230
   Kanehisa M, 2012, NUCLEIC ACIDS RES, V40, pD109, DOI 10.1093/nar/gkr988
   Kawajiri K, 2009, P NATL ACAD SCI USA, V106, P13481, DOI 10.1073/pnas.0902132106
   Kinde I, 2013, SCI TRANSL MED, V5, DOI 10.1126/scitranslmed.3004952
   Kitano H, 2002, NATURE, V420, P206, DOI 10.1038/nature01254
   Kitano H, 2012, LECT NOTES COMPUTER, P1
   Kondo M, 2004, CELL DEATH DIFFER, V11, P1092, DOI 10.1038/sj.cdd.4401467
   Liang P, 2003, NAT REV CANCER, V3, P869, DOI 10.1038/nrc1214
   Luscombe NM, 2004, NATURE, V431, P308, DOI 10.1038/nature02782
   Maglott D, 2007, NUCLEIC ACIDS RES, V35, pD26, DOI 10.1093/nar/gkl993
   Markowitz SD, 2009, NEW ENGL J MED, V361, P2449, DOI 10.1056/NEJMra0804588
   Miyazawa K, 2002, GENES CELLS, V7, P1191, DOI 10.1046/j.1365-2443.2002.00599.x
   POWELL SM, 1992, NATURE, V359, P235, DOI 10.1038/359235a0
   Sasaki N, 2001, CLIN CANCER RES, V7, P4136
   Sharma SV, 2007, NAT REV CANCER, V7, P169, DOI 10.1038/nrc2088
   Shin SM, 2006, GASTROENTEROLOGY, V130, P2074, DOI 10.1053/j.gastro.2006.03.055
   Starczynowski DT, 2011, J CLIN INVEST, V121, P4095, DOI 10.1172/JCI58818
   Stern HM, 2010, CLIN CANCER RES, V16, P1587, DOI 10.1158/1078-0432.CCR-09-3108
   Subramanian A, 2005, P NATL ACAD SCI USA, V102, P15545, DOI 10.1073/pnas.0506580102
   Taylor IW, 2009, NAT BIOTECHNOL, V27, P199, DOI 10.1038/nbt.1522
   Thibodeau J, 2012, ONCOIMMUNOLOGY, V1, P908, DOI 10.4161/onci.21205
   Tusher VG, 2001, P NATL ACAD SCI USA, V98, P5116, DOI 10.1073/pnas.091062498
   Wagner KW, 2007, NAT MED, V13, P1070, DOI 10.1038/nm1627
   Wei P, 2012, PLOS ONE, V7, DOI 10.1371/journal.pone.0046887
   West J, 2012, SCI REP-UK, V2, DOI 10.1038/srep00802
   Wood LD, 2007, SCIENCE, V318, P1108, DOI 10.1126/science.1145720
   Xulvi-Brunet R, 2010, BIOINFORMATICS, V26, P205, DOI 10.1093/bioinformatics/btp632
   Zheng Rena, 2010, Genes Cancer, V1, P1178, DOI 10.1177/1947601911404223
NR 54
TC 45
Z9 46
U1 0
U2 11
PU PUBLIC LIBRARY SCIENCE
PI SAN FRANCISCO
PA 1160 BATTERY STREET, STE 100, SAN FRANCISCO, CA 94111 USA
SN 1932-6203
J9 PLOS ONE
JI PLoS One
PD JAN 28
PY 2014
VL 9
IS 1
AR e87075
DI 10.1371/journal.pone.0087075
PG 10
WC Multidisciplinary Sciences
WE Science Citation Index Expanded (SCI-EXPANDED)
SC Science & Technology - Other Topics
GA 301CJ
UT WOS:000330510000104
PM 24489837
OA Green Published, gold
DA 2022-04-10
ER

PT J
AU Yeung, W
   Ruan, Z
   Kannan, N
AF Yeung, Wayland
   Ruan, Zheng
   Kannan, Natarajan
TI Emerging roles of the alpha C-beta 4 loop in protein kinase structure,
   function, evolution, and disease
SO IUBMB LIFE
LA English
DT Review
DE cancer mutation; conformational regulation; disease mutation; drug
   resistance; Hsp-90; molecular brake; post-translational modification;
   protein kinase
ID C-TERMINAL TAIL; CHRONIC MYELOGENOUS LEUKEMIA; GROWTH-FACTOR RECEPTOR;
   TGF-BETA RECEPTOR; MYCOBACTERIUM-TUBERCULOSIS; CONFORMATIONAL-CHANGES;
   DRUG-RESISTANCE; TYROSINE KINASE; ALLOSTERIC ACTIVATION;
   INHIBITOR-BINDING
AB The faithful propagation of cellular signals in most organisms relies on the coordinated functions of a large family of protein kinases that share a conserved catalytic domain. The catalytic domain is a dynamic scaffold that undergoes large conformational changes upon activation. Most of these conformational changes, such as movement of the regulatory alpha C-helix from an "out" to "in" conformation, hinge on a conserved, but understudied, loop termed the alpha C-beta 4 loop, which mediates conserved interactions to tether flexible structural elements to the kinase core. We previously showed that the alpha C-beta 4 loop is a unique feature of eukaryotic protein kinases. Here, we review the emerging roles of this loop in kinase structure, function, regulation, and diseases. Through a kinome-wide analysis, we define the boundaries of the loop for the first time and show that sequence and structural variation in the loop correlate with conformational and regulatory variation. Many recurrent disease mutations map to the alpha C-beta 4 loop and contribute to drug resistance and abnormal kinase activation by relieving key auto-inhibitory interactions associated with alpha C-helix and inter-lobe movement. The alpha C-beta 4 loop is a hotspot for post-translational modification, protein-protein interaction, and Hsp90 mediated folding. Our kinome-wide analysis provides insights for hypothesis-driven characterization of understudied kinases and the development of allosteric protein kinase inhibitors.
C1 [Yeung, Wayland; Ruan, Zheng; Kannan, Natarajan] Univ Georgia, Inst Bioinformat, Athens, GA 30602 USA.
   [Kannan, Natarajan] Univ Georgia, Dept Biochem & Mol Biol, Athens, GA 30602 USA.
RP Kannan, N (corresponding author), Univ Georgia, Inst Bioinformat, Athens, GA 30602 USA.
EM nkannan@uga.edu
OI Yeung, Wayland/0000-0002-2523-4984
FU National Institutes of HealthUnited States Department of Health & Human
   ServicesNational Institutes of Health (NIH) - USA [1U01CA239106,
   5R01GM114409]
FX National Institutes of Health, Grant/Award Numbers: 1U01CA239106,
   5R01GM114409
CR Adayev T, 2007, BIOCHEMISTRY-US, V46, P7614, DOI 10.1021/bi700251n
   Agnew C, 2019, J BIOL CHEM, V294, P13545, DOI 10.1074/jbc.RA119.009725
   Alexa A, 2015, P NATL ACAD SCI USA, V112, P2711, DOI 10.1073/pnas.1417571112
   Azam M, 2008, NAT STRUCT MOL BIOL, V15, P1109, DOI 10.1038/nsmb.1486
   Batson J, 2017, ACS CHEM BIOL, V12, P825, DOI 10.1021/acschembio.6b01048
   Berry T, 2012, CANCER CELL, V22, P117, DOI 10.1016/j.ccr.2012.06.001
   Bi WZ, 2010, J BIOL CHEM, V285, P6259, DOI 10.1074/jbc.M109.038570
   Bischof J, 2012, AMINO ACIDS, V43, P1577, DOI 10.1007/s00726-012-1234-x
   BONDI A, 1964, J PHYS CHEM-US, V68, P441, DOI 10.1021/j100785a001
   Brenan L, 2016, CELL REP, V17, P1171, DOI 10.1016/j.celrep.2016.09.061
   Bullock AN, 2009, STRUCTURE, V17, P352, DOI 10.1016/j.str.2008.12.023
   Chaikuad A, 2016, J MED CHEM, V59, P10315, DOI 10.1021/acs.jmedchem.6b01083
   Chaikuad A, 2014, NAT CHEM BIOL, V10, P853, DOI [10.1038/NCHEMBIO.1629, 10.1038/nchembio.1629]
   Chaikuad A, 2012, J BIOL CHEM, V287, P36990, DOI 10.1074/jbc.M112.365932
   Chen HB, 2007, MOL CELL, V27, P717, DOI 10.1016/j.molcel.2007.06.028
   Citri A, 2006, J BIOL CHEM, V281, P14361, DOI 10.1074/jbc.M512613200
   Corless CL, 2005, J CLIN ONCOL, V23, P5357, DOI 10.1200/JCO.2005.14.068
   Counago RM, 2017, SCI REP-UK, V7, DOI 10.1038/s41598-017-07755-y
   Dar AC, 2005, CELL, V122, P887, DOI 10.1016/j.cell.2005.06.044
   Diskin R, 2007, J MOL BIOL, V365, P66, DOI 10.1016/j.jmb.2006.08.043
   Elling C, 2011, BLOOD, V117, P2935, DOI 10.1182/blood-2010-05-286757
   Emery CM, 2009, P NATL ACAD SCI USA, V106, P20411, DOI 10.1073/pnas.0905833106
   Fountas A, 2015, TRENDS ENDOCRIN MET, V26, P643, DOI 10.1016/j.tem.2015.09.003
   Gajiwala KS, 2009, P NATL ACAD SCI USA, V106, P1542, DOI 10.1073/pnas.0812413106
   Galanis A, 2012, BLOOD, V120, DOI 10.1182/blood.V120.21.1341.1341
   Gallo LH, 2015, CYTOKINE GROWTH F R, V26, P425, DOI 10.1016/j.cytogfr.2015.03.003
   Gambacorti-Passerini CB, 2003, LANCET ONCOL, V4, P75, DOI 10.1016/S1470-2045(03)00979-3
   Gao Q, 2013, J BIOL CHEM, V288, P30125, DOI 10.1074/jbc.M113.473348
   Garner AP, 2014, CLIN CANCER RES, V20, P5745, DOI 10.1158/1078-0432.CCR-14-1397
   Gay LM, 2006, J MOL BIOL, V360, P409, DOI 10.1016/j.jmb.2006.05.015
   Gibbons DL, 2014, P NATL ACAD SCI USA, V111, P3550, DOI 10.1073/pnas.1321173111
   Girdler F, 2008, CHEM BIOL, V15, P552, DOI 10.1016/j.chembiol.2008.04.013
   Gross S, 2015, J CLIN INVEST, V125, P1780, DOI 10.1172/JCI76094
   Gu S, 2015, SCI REP-UK, V5, DOI 10.1038/srep16943
   Han N, 2014, ACTA CRYSTALLOGR F, V70, P438, DOI 10.1107/S2053230X14004774
   Haq T, 2015, NAT COMMUN, V6, DOI 10.1038/ncomms9771
   Hart GW, 2011, ANNU REV BIOCHEM, V80, P825, DOI 10.1146/annurev-biochem-060608-102511
   Hess DT, 2005, NAT REV MOL CELL BIO, V6, P150, DOI 10.1038/nrm1569
   Hikri E, 2009, CELL SIGNAL, V21, P588, DOI 10.1016/j.cellsig.2008.12.011
   Hirotsu Y, 2017, MED ONCOL, V34, DOI 10.1007/s12032-016-0857-2
   Hornbeck PV, 2015, NUCLEIC ACIDS RES, V43, pD512, DOI 10.1093/nar/gku1267
   Hu JC, 2013, CELL, V154, P1036, DOI 10.1016/j.cell.2013.07.046
   Huang KZ, 2016, ANN HEMATOL, V95, P783, DOI 10.1007/s00277-016-2616-z
   Huang QH, 2014, J MED CHEM, V57, P1170, DOI 10.1021/jm401805h
   Huse M, 2002, CELL, V109, P275, DOI 10.1016/S0092-8674(02)00741-9
   Huse M, 1999, CELL, V96, P425, DOI 10.1016/S0092-8674(00)80555-3
   Huse M, 2001, MOL CELL, V8, P671, DOI 10.1016/S1097-2765(01)00332-X
   Jabbour E, 2012, BLOOD, V120, P3382, DOI 10.1182/blood-2012-04-424192
   Johnson LN, 1996, CELL, V85, P149, DOI 10.1016/S0092-8674(00)81092-2
   Jones D, 2010, BLOOD, V115, P5428, DOI 10.1182/blood-2009-11-252155
   Joshi A, 2015, ONCOTARGET, V6, P13019, DOI 10.18632/oncotarget.3864
   KABSCH W, 1983, BIOPOLYMERS, V22, P2577, DOI 10.1002/bip.360221211
   Kallen J, 2018, CHEMMEDCHEM, V13, P1997, DOI 10.1002/cmdc.201800344
   Kannan N, 2005, J MOL BIOL, V351, P956, DOI 10.1016/j.jmb.2005.06.057
   Kannan N, 2008, BBA-PROTEINS PROTEOM, V1784, P27, DOI 10.1016/j.bbapap.2007.09.007
   Kannan N, 2007, P NATL ACAD SCI USA, V104, P1272, DOI 10.1073/pnas.0610251104
   Kaplan FS, 2015, AM J MED GENET A, V167, P2265, DOI 10.1002/ajmg.a.37205
   Kelly GM, 2012, J BIOL CHEM, V287, P28180, DOI 10.1074/jbc.M112.385757
   Kim K, 2018, J MOL BIOL, V430, P1521, DOI 10.1016/j.jmb.2018.04.001
   Kosaka T, 2017, CANCER RES, V77, P2712, DOI 10.1158/0008-5472.CAN-16-3404
   Kovacs E, 2015, MOL CELL BIOL, V35, P3083, DOI 10.1128/MCB.00248-15
   Kumar A, 2017, ELIFE, V6, DOI 10.7554/eLife.29985
   Kumar R, 2007, J MOL CELL CARDIOL, V42, P1, DOI 10.1016/j.yjmcc.2006.09.005
   Kwon A, 2019, SCI SIGNAL, V12, DOI 10.1126/scisignal.aav3810
   Lavoie H, 2018, NATURE, V554, P549, DOI 10.1038/nature25478
   Lew ED, 2009, SCI SIGNAL, V2, DOI 10.1126/scisignal.2000021
   Li JQ, 2014, MOL NEURODEGENER, V9, DOI 10.1186/1750-1326-9-47
   Liu HH, 2014, ACTA CRYSTALLOGR D, V70, P501, DOI 10.1107/S1399004713027879
   Liu L, 2017, CELL, V168, P121, DOI 10.1016/j.cell.2016.12.031
   Liu WZ, 2012, PLOS ONE, V7, DOI 10.1371/journal.pone.0036562
   Lombana TN, 2010, STRUCTURE, V18, P1667, DOI 10.1016/j.str.2010.09.019
   Manning G, 2002, SCIENCE, V298, P1912, DOI 10.1126/science.1075762
   McSkimming DI, 2015, HUM MUTAT, V36, P175, DOI 10.1002/humu.22726
   Meharena HS, 2013, PLOS BIOL, V11, DOI 10.1371/journal.pbio.1001680
   Metz KS, 2018, CELL SYST, V7, P347, DOI 10.1016/j.cels.2018.07.001
   Neuwald AF, 2009, BIOINFORMATICS, V25, P1869, DOI 10.1093/bioinformatics/btp342
   Ngo JCK, 2007, STRUCTURE, V15, P123, DOI 10.1016/j.str.2006.11.011
   Nicolini FE, 2006, LEUKEMIA, V20, P1061, DOI 10.1038/sj.leu.2404236
   Nolen B, 2004, MOL CELL, V15, P661, DOI 10.1016/j.molcel.2004.08.024
   Nolen B, 2003, BIOCHEMISTRY-US, V42, P9575, DOI 10.1021/bi0344331
   Opatz S, 2013, BLOOD, V122, P1761, DOI 10.1182/blood-2013-01-476473
   Oruganty K, 2013, P NATL ACAD SCI USA, V110, P924, DOI 10.1073/pnas.1207104110
   Palmieri L, 2013, DRUG DISCOV TODAY, V18, P407, DOI 10.1016/j.drudis.2012.11.009
   Patani H, 2016, ONCOTARGET, V7, P24252, DOI 10.18632/oncotarget.8132
   Qiu W, 2009, EMBO J, V28, P969, DOI 10.1038/emboj.2009.24
   Rajakulendran T, 2009, NATURE, V461, P542, DOI 10.1038/nature08314
   Rand V, 2005, P NATL ACAD SCI USA, V102, P14344, DOI 10.1073/pnas.0507200102
   Roberts KG, 2007, MOL CANCER THER, V6, P1159, DOI 10.1158/1535-7163.MCT-06-0641
   Robles-Flores M, 2008, BBA-MOL CELL RES, V1783, P695, DOI 10.1016/j.bbamcr.2007.07.011
   Roskoski R, 2016, PHARMACOL RES, V103, P26, DOI 10.1016/j.phrs.2015.10.021
   Ruan Z, 2018, P NATL ACAD SCI USA, V115, pEB162, DOI 10.1073/pnas.1803152115
   Ruan Z, 2015, BIOCHEMISTRY-US, V54, P4216, DOI 10.1021/acs.biochem.5b00444
   Sajnaga E, 2008, ACTA BIOCHIM POL, V55, P767, DOI 10.18388/abp.2008_3039
   Salvador JM, 2005, NAT IMMUNOL, V6, P390, DOI 10.1038/ni1177
   Scheeff ED, 2005, PLOS COMPUT BIOL, V1, P359, DOI 10.1371/journal.pcbi.0010049
   Scheeff ED, 2009, STRUCTURE, V17, P128, DOI 10.1016/j.str.2008.10.018
   Schmid E, 1999, ANTIOXID REDOX SIGN, V1, P45, DOI 10.1089/ars.1999.1.1-45
   Smith CC, 2015, CANCER DISCOV, V5, P668, DOI 10.1158/2159-8290.CD-15-0060
   Soundararajan M, 2013, STRUCTURE, V21, P986, DOI 10.1016/j.str.2013.03.012
   Taipale M, 2012, CELL, V150, P987, DOI 10.1016/j.cell.2012.06.047
   Talevich E, 2013, BMC EVOL BIOL, V13, DOI 10.1186/1471-2148-13-117
   Tate JG, 2019, NUCLEIC ACIDS RES, V47, pD941, DOI 10.1093/nar/gky1015
   Taylor SS, 2015, BBA-PROTEINS PROTEOM, V1854, P1567, DOI 10.1016/j.bbapap.2015.04.007
   Taylor SS, 2011, TRENDS BIOCHEM SCI, V36, P65, DOI 10.1016/j.tibs.2010.09.006
   THANKI N, 1991, J MOL BIOL, V221, P669, DOI 10.1016/0022-2836(91)80080-E
   Ubersax JA, 2007, NAT REV MOL CELL BIO, V8, P530, DOI 10.1038/nrm2203
   Verba KA, 2017, TRENDS BIOCHEM SCI, V42, P799, DOI 10.1016/j.tibs.2017.07.002
   Walter A, 2018, PLOS ONE, V13, DOI 10.1371/journal.pone.0196761
   Wan PTC, 2004, CELL, V116, P855, DOI 10.1016/S0092-8674(04)00215-6
   Wells L, 2003, BIOCHEM BIOPH RES CO, V302, P435, DOI 10.1016/S0006-291X(03)00175-X
   Xu W, 2007, BRIT J CANCER, V97, P741, DOI 10.1038/sj.bjc.6603950
   Xu WP, 2005, NAT STRUCT MOL BIOL, V12, P120, DOI 10.1038/nsmb885
   Yasuda H, 2013, SCI TRANSL MED, V5, DOI 10.1126/scitranslmed.3007205
   Yasuda H, 2012, LANCET ONCOL, V13, pE23, DOI 10.1016/S1470-2045(11)70129-2
   Young TA, 2003, NAT STRUCT BIOL, V10, P168, DOI 10.1038/nsb897
   Yun CH, 2008, P NATL ACAD SCI USA, V105, P2070, DOI 10.1073/pnas.0709662105
   Zhang QQ, 2018, PROTEIN CELL, V9, P971, DOI 10.1007/s13238-017-0502-7
   ZHENG JH, 1993, ACTA CRYSTALLOGR D, V49, P362, DOI 10.1107/S0907444993000423
   Zorn JA, 2015, PLOS ONE, V10, DOI 10.1371/journal.pone.0121177
NR 119
TC 6
Z9 6
U1 0
U2 2
PU WILEY
PI HOBOKEN
PA 111 RIVER ST, HOBOKEN 07030-5774, NJ USA
SN 1521-6543
EI 1521-6551
J9 IUBMB LIFE
JI IUBMB Life
PD JUN
PY 2020
VL 72
IS 6
SI SI
BP 1189
EP 1202
DI 10.1002/iub.2253
EA FEB 2020
PG 14
WC Biochemistry & Molecular Biology; Cell Biology
WE Science Citation Index Expanded (SCI-EXPANDED)
SC Biochemistry & Molecular Biology; Cell Biology
GA LP9ND
UT WOS:000520098900001
PM 32101380
OA Bronze, Green Accepted
DA 2022-04-10
ER

PT J
AU Cadieux, C
   Kedinger, V
   Yao, L
   Vadnais, C
   Drossos, M
   Paquet, M
   Nepveu, A
AF Cadieux, Chantal
   Kedinger, Valerie
   Yao, Lu
   Vadnais, Charles
   Drossos, Maria
   Paquet, Marilene
   Nepveu, Alain
TI Mouse Mammary Tumor Virus p75 and p110 CUX1 Transgenic Mice Develop
   Mammary Tumors of Various Histologic Types
SO CANCER RESEARCH
LA English
DT Article
ID DROSOPHILA WING MARGIN; BREAST-CANCER; GENE-EXPRESSION; TRANSCRIPTION
   FACTOR; EPITHELIAL-CELLS; CUT EXPRESSION; DNA-BINDING; S-PHASE;
   HYPERPLASIA; ACTIVATION
AB The p75 and p110 isoforms of the CUX1 homeodomain protein are overexpressed in breast tumors and cancer cell lines. To assess and compare the ability of these short CUX1 isoforms in driving mammary tumor development, we used site-specific transgenesis into the Hprt locus to generate transgenic mice expressing p75 or p110 CUX1 under the control of the mouse mammary tumor virus-long terminal repeat. We report that mammary tumors developed after a long latency period, and although various histopathologies were observed, the proportion of adenosquamous carcinomas was significantly higher in p75 CUX1 than in p110 CUX1 transgenic mice. Metastasis to the lung was observed in three p75 CUX1 transgenic mice. Comparisons between tumors and adjacent normal mammary glands revealed that transgenes were overexpressed in most but not all tumors, yet in all cases tested, CUX1 DNA binding was increased, suggesting that both higher expression an changes in post-translational modification can contribute to stimulate transgene activity. Interestingly, higher expression of erbB2 mRNA was seen in most tumors, not only solid carcinomas but also adenosquamous carcinomas, whereas higher expression of various Wnt genes and activation of the beta-catenin pathway was observed primarily in adenosquamous carcinomas. Activation of erbB2 expression appeared to represent a cooperating event that occurred independently of CUX1. In contrast, chromatin immunoprecipitation, short hairpin RNA-mediated knockdown, and reporter assays established that CUX1 is involved in the transcriptional regulation of several Wnt genes. Together, these results support the notion that oncogenic activity of CUX1 can facilitate the establishment of a Wnt/beta-catenin autocrine loop. [Cancer Res 2009;69(18):7188-97]
C1 [Cadieux, Chantal; Kedinger, Valerie; Yao, Lu; Vadnais, Charles; Drossos, Maria; Paquet, Marilene; Nepveu, Alain] McGill Univ, Goodman Canc Ctr, Montreal, PQ H3A 1A3, Canada.
   [Cadieux, Chantal; Yao, Lu; Vadnais, Charles; Nepveu, Alain] McGill Univ, Dept Biochem, Montreal, PQ H3A 1A3, Canada.
   [Nepveu, Alain] McGill Univ, Dept Med, Montreal, PQ H3A 1A3, Canada.
   [Nepveu, Alain] McGill Univ, Dept Oncol, Montreal, PQ H3A 1A3, Canada.
RP Nepveu, A (corresponding author), McGill Univ, Goodman Canc Ctr, 1160 Pine Ave W,Room 414, Montreal, PQ H3A 1A3, Canada.
EM alain.nepveu@mcgill.ca
RI /AAB-8315-2020; Paquet, Marilene/L-3414-2019
OI Paquet, Marilene/0000-0002-3562-4636
FU Canadian Breast Cancer Research Alliance [19411]; Department of Defense
   Breast Cancer Research ProgramUnited States Department of Defense
FX Grant support: Canadian Breast Cancer Research Alliance grant 19411 (A.
   Nepveu). Department of Defense Breast Cancer Research Program (2006)
   studentships (C. Cadieux).
CR Bergmann S, 2005, CANCER RES, V65, P4078, DOI 10.1158/0008-5472.CAN-04-4056
   Brantley JG, 2003, KIDNEY INT, V63, P1240, DOI 10.1046/j.1523-1755.2003.00889.x
   Bronson SK, 1996, P NATL ACAD SCI USA, V93, P9067, DOI 10.1073/pnas.93.17.9067
   Brotherick I, 1998, CYTOMETRY, V32, P301, DOI 10.1002/(SICI)1097-0320(19980801)32:4<301::AID-CYTO7>3.3.CO;2-R
   Cadieux C, 2008, J BIOL CHEM, V283, P13817, DOI 10.1074/jbc.M709332200
   Cadieux C, 2006, CANCER RES, V66, P9492, DOI 10.1158/0008-5472.CAN-05-4230
   Carboni JM, 2005, CANCER RES, V65, P3781, DOI 10.1158/0008-5472.CAN-04-4602
   De Vos J, 2002, ONCOGENE, V21, P6848, DOI 10.1038/sj.onc.1205868
   Dearth RK, 2006, MOL CELL BIOL, V26, P9302, DOI 10.1128/MCB.00260-06
   Goulet B, 2002, CANCER RES, V62, P6625
   Goulet B, 2007, MOL CANCER RES, V5, P899, DOI 10.1158/1541-7786.MCR-07-0160
   HARADA R, 1995, MOL CELL BIOL, V15, P129, DOI 10.1128/MCB.15.1.129
   Harada R, 2008, NUCLEIC ACIDS RES, V36, P189, DOI 10.1093/nar/gkm970
   Huang SX, 2006, TECHNOL CANCER RES T, V5, P565, DOI 10.1177/153303460600500603
   JACK J, 1992, GENETICS, V131, P353
   JACK J, 1991, DEVELOPMENT, V113, P735
   Landesman-Bollag E, 2001, ONCOGENE, V20, P3247, DOI 10.1038/sj.onc.1204411
   Ledford AW, 2002, DEV BIOL, V245, P157, DOI 10.1006/dbio.2002.0636
   Li Y, 2000, ONCOGENE, V19, P1002, DOI 10.1038/sj.onc.1203273
   Li Y, 2003, P NATL ACAD SCI USA, V100, P15853, DOI 10.1073/pnas.2136825100
   LIN TP, 1992, CANCER RES, V52, P4413
   Micchelli CA, 1997, DEVELOPMENT, V124, P1485
   Michl P, 2005, CANCER CELL, V7, P521, DOI 10.1016/j.ccr.2005.05.018
   Miyoshi K, 2002, ONCOGENE, V21, P5548, DOI 10.1038/sj.onc.1205686
   Miyoshi K, 2002, P NATL ACAD SCI USA, V99, P219, DOI 10.1073/pnas.012414099
   Moon NS, 2000, J BIOL CHEM, V275, P31325, DOI 10.1074/jbc.M002912200
   Moon NS, 2002, INT J CANCER, V100, P429, DOI 10.1002/ijc.10510
   Moon NS, 2001, MOL CELL BIOL, V21, P6332, DOI 10.1128/MCB.21.18.6332-6345.2001
   Nepveu A, 2001, GENE, V270, P1, DOI 10.1016/S0378-1119(01)00485-1
   Neumann CJ, 1996, DEVELOPMENT, V122, P3477
   Philippe J, 1994, Methods Mol Biol, V31, P349
   Pirkmaier A, 2003, ONCOGENE, V22, P4425, DOI 10.1038/sj.onc.1206488
   Podsypanina K, 2004, BMC MED, V2, DOI 10.1186/1741-7015-2-24
   Romieu-Mourez R, 2003, MOL CELL BIOL, V23, P5738, DOI 10.1128/MCB.23.16.5738-5754.2003
   Rose-Hellekant TA, 2003, ONCOGENE, V22, P4664, DOI 10.1038/sj.onc.1206619
   Rosner A, 2002, AM J PATHOL, V161, P1087, DOI 10.1016/S0002-9440(10)64269-1
   Sansregret L, 2006, MOL CELL BIOL, V26, P2441, DOI 10.1128/MCB.26.6.2441-2455.2006
   Sansregret L, 2008, GENE, V412, P84, DOI 10.1016/j.gene.2008.01.017
   Sum EYM, 2005, P NATL ACAD SCI USA, V102, P7659, DOI 10.1073/pnas.0502990102
   Szulc J, 2006, NAT METHODS, V3, P109, DOI 10.1038/NMETH846
   Teuliere J, 2005, DEVELOPMENT, V132, P267, DOI 10.1242/dev.01583
   Tsutsumi S, 2003, CANCER RES, V63, P4882
   Uyttendaele H, 1998, DEV BIOL, V196, P204, DOI 10.1006/dbio.1998.8863
   WANG TC, 1994, NATURE, V369, P669, DOI 10.1038/369669a0
   White DE, 2001, ONCOGENE, V20, P7064, DOI 10.1038/sj.onc.1204910
   Woelfle U, 2004, CLIN CANCER RES, V10, P2670, DOI 10.1158/1078-0432.CCR-03-0114
NR 46
TC 29
Z9 30
U1 0
U2 0
PU AMER ASSOC CANCER RESEARCH
PI PHILADELPHIA
PA 615 CHESTNUT ST, 17TH FLOOR, PHILADELPHIA, PA 19106-4404 USA
SN 0008-5472
EI 1538-7445
J9 CANCER RES
JI Cancer Res.
PD SEP 15
PY 2009
VL 69
IS 18
BP 7188
EP 7197
DI 10.1158/0008-5472.CAN-08-4899
PG 10
WC Oncology
WE Science Citation Index Expanded (SCI-EXPANDED)
SC Oncology
GA 496FC
UT WOS:000269954000011
PM 19738070
OA Bronze
DA 2022-04-10
ER

PT J
AU Lavarone, E
   Puppin, C
   Passon, N
   Filetti, S
   Russo, D
   Damante, G
AF Lavarone, Elisa
   Puppin, Cinzia
   Passon, Nadia
   Filetti, Sebastiano
   Russo, Diego
   Damante, Giuseppe
TI The PARP inhibitor PJ34 modifies proliferation, NIS expression and
   epigenetic marks in thyroid cancer cell lines
SO MOLECULAR AND CELLULAR ENDOCRINOLOGY
LA English
DT Article
DE NIS; Thyroid tumors; Epigenetics; Gene expression; Histone
   post-translational modification
ID TRANSACTIVE TRANSCRIPTIONAL REPRESSOR; SYMPORTER GENE-EXPRESSION;
   SODIUM/IODIDE SYMPORTER; HISTONE MODIFICATIONS; POLY(ADP-RIBOSE)
   POLYMERASE; IODIDE TRANSPORT; DNA-DAMAGE; PROTEIN; GENOME; EZH2
AB Since PARP-1 is supposed to be part of a multimeric repressor of sodium iodide symporter (NIS) expression, in this study the effect of the PARP inhibitor PJ34 on several properties of thyroid cancer cell lines was investigated. In TPC1, BCPAP, FRO, WRO cell lines PJ34 induced a strong increase in NIS mRNA levels. In BCPAP and TPC1 cells also significant increase of radio-iodine uptake was induced. Accordingly, in transfection experiments performed in TPC1 cells, treatment with PJ34 increased NIS promoter activity without affecting PARP-1 binding to the promoter sequence. We also investigated the epigenetic status of NIS promoter after PJ34 treatment in TPC1 cell line: in addition to an increase of histone modification activation marks (H3K9K14ac, H3K4me3), surprisingly we observed also an increase of H3K27me3, a classical repressive mark.
   Our data demonstrate that in various thyroid cancer cell lines PARP inhibition increases NIS gene expression through a particular modulation of transcriptional regulatory mechanisms. Therefore, we suggest that PARP inhibitors may deserve future investigations as tools for medical treatment of thyroid cancer. (C) 2012 Elsevier Ireland Ltd. All rights reserved.
C1 [Lavarone, Elisa; Puppin, Cinzia; Passon, Nadia; Damante, Giuseppe] Univ Udine, Dipartimento Sci Med & Biol, I-33100 Udine, Italy.
   [Filetti, Sebastiano] Univ Roma La Sapienza, Dipartimento Med Interna & Specialita Med, Rome, Italy.
   [Russo, Diego] Univ Catanzaro, Dipartimento Sci Salute, Catanzaro, Italy.
   [Damante, Giuseppe] Azienda Osped Univ S Maria Misericordia, Udine, Italy.
RP Damante, G (corresponding author), Univ Udine, Dipartimento Sci Med & Biol, Piazzale Kolbe 1, I-33100 Udine, Italy.
EM giuseppe.damante@uniud.it
RI Damante, Giuseppe/AAC-5200-2022
FU Associazione Italiana per la Ricerca sul Cancro (AIRC)Fondazione AIRC
   per la ricerca sul cancro [IG 10296]; MIURMinistry of Education,
   Universities and Research (MIUR) [20093WAPYK_003]
FX This work was supported by grants to GD from the Associazione Italiana
   per la Ricerca sul Cancro (AIRC) (Grant no. IG 10296) and MIUR(Grant no.
   20093WAPYK_003). Author thank Dr. J. Hershman for providing plasmids
   with transcriptional units of NIS gene.
CR Annunziata CM, 2010, CLIN CANCER RES, V16, P4517, DOI 10.1158/1078-0432.CCR-10-0526
   Barski A, 2007, CELL, V129, P823, DOI 10.1016/j.cell.2007.05.009
   Bernstein BE, 2006, CELL, V125, P315, DOI 10.1016/j.cell.2006.02.041
   Caiafa P, 2009, FASEB J, V23, P672, DOI 10.1096/fj.08-123265
   Caiafa P, 2009, J CELL PHYSIOL, V219, P265, DOI 10.1002/jcp.21691
   Chevanne M, 2010, J CELL PHYSIOL, V222, P401, DOI 10.1002/jcp.21964
   Cohen-Armon M, 2007, MOL CELL, V25, P297, DOI 10.1016/j.molcel.2006.12.012
   DE la Vieja A, 2000, PHYSIOL REV, V80, P1083, DOI 10.1152/physrev.2000.80.3.1083
   Di Palma T, 2008, J MOL ENDOCRINOL, V41, P379, DOI 10.1677/JME-08-0056
   Dohan O, 2004, CANC TREAT, V122, P221
   Dohan O, 2001, J CLIN ENDOCR METAB, V86, P2697, DOI 10.1210/jc.86.6.2697
   Durante C, 2007, J CLIN ENDOCR METAB, V92, P2840, DOI 10.1210/jc.2006-2707
   Fullgrabe J, 2011, ONCOGENE, V30, P3391, DOI 10.1038/onc.2011.121
   Jagtap P, 2005, NAT REV DRUG DISCOV, V4, P421, DOI 10.1038/nrd1718
   Kogai T, 2001, ENDOCRINOLOGY, V142, P3369, DOI 10.1210/en.142.8.3369
   Kolthur-Seetharam U, 2006, CELL CYCLE, V5, P873, DOI 10.4161/cc.5.8.2690
   Lazar V, 1999, J CLIN ENDOCR METAB, V84, P3228, DOI 10.1210/jc.84.9.3228
   Li W, 2007, J CLIN ENDOCR METAB, V92, P1080, DOI 10.1210/jc.2006-2106
   Li W, 2010, ENDOCR-RELAT CANCER, V17, P383, DOI 10.1677/ERC-09-0156
   Madison DL, 2011, DNA REPAIR, V10, P1003, DOI 10.1016/j.dnarep.2011.07.006
   Maeda Y, 2006, J BIOL CHEM, V281, P9600, DOI 10.1074/jbc.M510435200
   Mangerich A, 2011, INT J CANCER, V128, P251, DOI 10.1002/ijc.25683
   Mikkelsen TS, 2007, NATURE, V448, P553, DOI 10.1038/nature06008
   O'Brien T, 2009, EMBO MOL MED, V1, P297, DOI 10.1002/emmm.200900044
   Plummer R, 2010, CLIN CANCER RES, V16, P4527, DOI 10.1158/1078-0432.CCR-10-0984
   Pokholok DK, 2005, CELL, V122, P517, DOI 10.1016/j.cell.2005.06.026
   Rando OJ, 2007, CURR OPIN GENET DEV, V17, P94, DOI 10.1016/j.gde.2007.02.006
   Riesco-Eizaguirre G, 2009, CANCER RES, V69, P8317, DOI 10.1158/0008-5472.CAN-09-1248
   ROBBINS J, 1991, ANN INTERN MED, V115, P133, DOI 10.7326/0003-4819-115-2-133
   Roh TY, 2006, P NATL ACAD SCI USA, V103, P15782, DOI 10.1073/pnas.0607617103
   Russo D, 2011, J MOL ENDOCRINOL, V46, pR73, DOI 10.1530/JME-10-0150
   Santos-Rosa H, 2002, NATURE, V419, P407, DOI 10.1038/nature01080
   Schlumberger M, 2007, NAT CLIN PRACT ENDOC, V3, P260, DOI 10.1038/ncpendmet0449
   Schwartz YB, 2007, NAT REV GENET, V8, P9, DOI 10.1038/nrg1981
   Schweppe RE, 2008, J CLIN ENDOCR METAB, V93, P4331, DOI 10.1210/jc.2008-1102
   Seligson DB, 2009, AM J PATHOL, V174, P1619, DOI 10.2353/ajpath.2009.080874
   Simon JA, 2008, MUTAT RES-FUND MOL M, V647, P21, DOI 10.1016/j.mrfmmm.2008.07.010
   Sparmann A, 2006, NAT REV CANCER, V6, P846, DOI 10.1038/nrc1991
   Taki K, 2002, MOL ENDOCRINOL, V16, P2266, DOI 10.1210/me.2002-0109
   Tonini T, 2008, J CELL PHYSIOL, V214, P295, DOI 10.1002/jcp.21241
   Trapasso F, 1999, EUR J ENDOCRINOL, V140, P447, DOI 10.1530/eje.0.1400447
   Tsang DPF, 2011, J GASTROEN HEPATOL, V26, P19, DOI 10.1111/j.1440-1746.2010.06447.x
   Tucker CL, 2003, NAT GENET, V35, P204, DOI 10.1038/ng1103-204
   WEISS SJ, 1984, ENDOCRINOLOGY, V114, P1090, DOI 10.1210/endo-114-4-1090
NR 44
TC 13
Z9 15
U1 1
U2 17
PU ELSEVIER IRELAND LTD
PI CLARE
PA ELSEVIER HOUSE, BROOKVALE PLAZA, EAST PARK SHANNON, CO, CLARE, 00000,
   IRELAND
SN 0303-7207
J9 MOL CELL ENDOCRINOL
JI Mol. Cell. Endocrinol.
PD JAN 5
PY 2013
VL 365
IS 1
BP 1
EP 10
DI 10.1016/j.mce.2012.08.019
PG 10
WC Cell Biology; Endocrinology & Metabolism
WE Science Citation Index Expanded (SCI-EXPANDED)
SC Cell Biology; Endocrinology & Metabolism
GA 049LT
UT WOS:000311985200001
PM 22982218
DA 2022-04-10
ER

PT J
AU Brown, ZZ
   Muller, MM
   Jain, SU
   Allis, CD
   Lewis, PW
   Muir, TW
AF Brown, Zachary Z.
   Mueller, Manuel M.
   Jain, Siddhant U.
   Allis, C. David
   Lewis, Peter W.
   Muir, Tom W.
TI Strategy for "Detoxification" of a Cancer-Derived Histone Mutant Based
   on Mapping Its Interaction with the Methyltransferase PRC2
SO JOURNAL OF THE AMERICAN CHEMICAL SOCIETY
LA English
DT Article
ID PEDIATRIC GLIOBLASTOMA; GENE-EXPRESSION; METHYLATION; INHIBITION;
   MUTATION; PROTEIN; COMPLEX
AB The histone methyltransferase PRC2 plays a central role in genomic stability and cellular development. Consequently, its misregulation has been implicated in several cancers. Recent work has shown that a histone H3 mutant, where the PRC2 substrate residue Lys27 is replaced by methionine, is also associated with cancer phenotypes and functions as an inhibitor of PRC2. Here we investigate the mechanism of this PRC2 inhibition through kinetic studies and photo-cross-linking. Efficient inhibition is dependent on (1) hydrophobic lysine isosteres blocking the active site, (2) proximal residues, and (3) the H3 tail forming extensive contacts with the EZH2 subunit of PRC2. We further show that naturally occurring post-translational modification of the same H3 tail, both proximal and distal to K27M, can greatly diminish the inhibition of PRC2. These results suggest that this potent gain of function mutation may be detoxified by modulating alternate chromatin modification pathways.
C1 [Brown, Zachary Z.; Mueller, Manuel M.; Muir, Tom W.] Princeton Univ, Dept Chem, Princeton, NJ 08544 USA.
   [Jain, Siddhant U.; Lewis, Peter W.] Univ Wisconsin, Inst Discovery, Madison, WI 53715 USA.
   [Allis, C. David] Rockefeller Univ, Lab Chromatin Biol & Epigenet, New York, NY 10065 USA.
RP Muir, TW (corresponding author), Princeton Univ, Dept Chem, Princeton, NJ 08544 USA.
EM muir@princeton.edu
RI Müller, Manuel/F-7399-2014; Krammel, Vera/N-4826-2014; Mueller, Manuel
   M/D-5562-2017
OI Müller, Manuel/0000-0001-6701-0893; Krammel, Vera/0000-0002-8273-8396;
   Mueller, Manuel M/0000-0001-6701-0893; Jain,
   Siddhant/0000-0002-7390-6757; Lewis, Peter/0000-0002-9816-7823
FU U.S. National Institutes of HealthUnited States Department of Health &
   Human ServicesNational Institutes of Health (NIH) - USA [R37-GM086868,
   R01 GM107047]; STARR foundation [I6-A614]; NATIONAL INSTITUTE OF GENERAL
   MEDICAL SCIENCESUnited States Department of Health & Human
   ServicesNational Institutes of Health (NIH) - USANIH National Institute
   of General Medical Sciences (NIGMS) [R01GM040922, R01GM107047,
   R37GM086868] Funding Source: NIH RePORTER
FX We thank Lotus separations for purification of Fmoc-2-aminoheptanoic
   acid, Ha-Eun Kong for help with peptide synthesis, Dr. Lenka Bittova for
   providing p300, and members of the Muir and Allis laboratories for
   valuable discussions. This research was supported by the U.S. National
   Institutes of Health (grants R37-GM086868 and R01 GM107047) and the
   STARR foundation (grant I6-A614).
CR Bender S, 2013, CANCER CELL, V24, P660, DOI 10.1016/j.ccr.2013.10.006
   Chan KM, 2013, GENE DEV, V27, P985, DOI 10.1101/gad.217778.113
   CHENG Y, 1973, BIOCHEM PHARMACOL, V22, P3099
   Ciferri C, 2012, ELIFE, V1, DOI 10.7554/eLife.00005
   Copeland R. A, 2002, ENZYMES, P266, DOI DOI 10.1002/0471220639.CH8
   Di Lorenzo A, 2011, FEBS LETT, V585, P2024, DOI 10.1016/j.febslet.2010.11.010
   Diaz E, 2012, J BIOMOL SCREEN, V17, P1279, DOI 10.1177/1087057112453765
   Fischle W, 2003, NATURE, V425, P475, DOI 10.1038/nature02017
   Kuzmichev A, 2002, GENE DEV, V16, P2893, DOI 10.1101/gad.1035902
   Lau PNI, 2011, P NATL ACAD SCI USA, V108, P2801, DOI 10.1073/pnas.1012798108
   Lewis PW, 2013, SCIENCE, V340, P857, DOI 10.1126/science.1232245
   Lowary PT, 1998, J MOL BIOL, V276, P19, DOI 10.1006/jmbi.1997.1494
   Maigueron R., 2009, NATURE, V461, P762
   Margueron R, 2011, NATURE, V469, P343, DOI 10.1038/nature09784
   Schmitges FW, 2011, MOL CELL, V42, P330, DOI 10.1016/j.molcel.2011.03.025
   Schwartzentruber J, 2012, NATURE, V482, P226, DOI [10.1038/nature10833, 10.1007/s13311-012-0137-6]
   Simon JA, 2008, MUTAT RES-FUND MOL M, V647, P21, DOI 10.1016/j.mrfmmm.2008.07.010
   Strahl BD, 2000, NATURE, V403, P41, DOI 10.1038/47412
   Trievel RC, 2002, CELL, V111, P91, DOI 10.1016/S0092-8674(02)01000-0
   Wu G, 2012, NAT GENET, V44, P251, DOI 10.1038/ng.1102
NR 20
TC 62
Z9 62
U1 0
U2 27
PU AMER CHEMICAL SOC
PI WASHINGTON
PA 1155 16TH ST, NW, WASHINGTON, DC 20036 USA
SN 0002-7863
J9 J AM CHEM SOC
JI J. Am. Chem. Soc.
PD OCT 1
PY 2014
VL 136
IS 39
BP 13498
EP 13501
DI 10.1021/ja5060934
PG 4
WC Chemistry, Multidisciplinary
WE Science Citation Index Expanded (SCI-EXPANDED); Index Chemicus (IC)
SC Chemistry
GA AQ2IK
UT WOS:000342608800008
PM 25180930
OA Green Published, hybrid
DA 2022-04-10
ER

PT J
AU Bencivenga, D
   Tramontano, A
   Borgia, A
   Negri, A
   Caldarelli, I
   Oliva, A
   Perrotta, S
   Della Ragione, F
   Borriello, A
AF Bencivenga, Debora
   Tramontano, Annunziata
   Borgia, Alessia
   Negri, Aide
   Caldarelli, Ilaria
   Oliva, Adriana
   Perrotta, Silverio
   Della Ragione, Fulvio
   Borriello, Adriana
TI p27Kip1 serine 10 phosphorylation determines its metabolism and
   interaction with cyclin-dependent kinases
SO CELL CYCLE
LA English
DT Article
DE cyclin-depedent kinases regulation; p27Kip1; p27Kip1 metabolism; p27Kip1
   modifications
ID CDK INHIBITOR P27; P27(KIP1) PHOSPHORYLATION; SUBCELLULAR-LOCALIZATION;
   CELL-MIGRATION; PROTEIN; BINDING; DEGRADATION; PATHWAY; MICE;
   DIFFERENTIATION
AB p27Kip1 is a critical modulator of cell proliferation by controlling assembly, localization and activity of cyclin-dependent kinase (CDK). p27Kip1 also plays important roles in malignant transformation, modulating cell movement and interaction with the extracellular matrix. A critical p27Kip1 feature is the lack of a stable tertiary structure that enhances its "adaptability" to different interactors and explains the heterogeneity of its function. The absence of a well-defined folding underlines the importance of p27Kip1 post-translational modification that might highly impact the protein functions. Here, we characterize the metabolism and CDK interaction of phosphoserine10-p27Kip1 (pS10-p27Kip1), the major phosphoisoform of p27Kip1. By an experimental strategy based on specific immunoprecipitation and bidimensional electrophoresis, we established that pS10-p27Kip1 is mainly bound to cyclin E/CDK2 rather than to cyclin A/CDK2. pS10-p27Kip1 is more stable than non-modified p27Kip1, since it is not (or scarcely) phosphorylated on T187, the post-translational modification required for p27Kip1 removal in the nucleus. pS10-p27Kip1 does not bind CDK1. The lack of this interaction might represent a mechanism for facilitating CDK1 activation and allowing mitosis completion. In conclusion, we suggest that nuclear p27Kip1 follows 2 almost independent pathways operating at different rates. One pathway involves threonine-187 and tyrosine phosphorylations and drives the protein toward its Skp2-dependent removal. The other involves serine-10 phosphorylation and results in the elongation of p27Kip1 half-life and specific CDK interactions. Thus, pS10-p27Kip1, due to its stability, might be thought as a major responsible for the p27Kip1-dependent arrest of cells in G1/G0 phase.
C1 [Bencivenga, Debora; Tramontano, Annunziata; Borgia, Alessia; Caldarelli, Ilaria; Oliva, Adriana; Della Ragione, Fulvio; Borriello, Adriana] Univ Naples 2, Dept Biochem Biophys & Gen Pathol, Naples, Italy.
   [Negri, Aide] Univ Florence, Dipartimento Sci Biomed Sperimentali & Clin, Florence, Italy.
   [Perrotta, Silverio] Univ Naples 2, Dipartimento Donna Bambino & Chirurg Gen & Specia, Naples, Italy.
RP Della Ragione, F (corresponding author), Univ Naples 2, Dept Biochem Biophys & Gen Pathol, Naples, Italy.
EM fulvio.dellaragione@unina2.it
OI BENCIVENGA, Debora/0000-0003-0977-5374; BORRIELLO,
   Adriana/0000-0002-9026-8048; Perrotta, Silverio/0000-0001-6149-6845;
   Della Ragione, Fulvio/0000-0002-0592-4283; Negri,
   Aide/0000-0003-4701-4023
FU Associazione Italiana per la Ricerca sul Cancro (AIRC) (FDR)Fondazione
   AIRC per la ricerca sul cancro [11653]
FX This work was supported in part by grant no. 11653 from the Associazione
   Italiana per la Ricerca sul Cancro (AIRC) (FDR).
CR Barbacid A, 2005, COLD SH Q B, V70, P233
   Barriere C, 2007, MOL ONCOL, V1, P72, DOI 10.1016/j.molonc.2007.03.001
   Berthet C, 2003, CURR BIOL, V13, P1775, DOI 10.1016/j.cub.2003.09.024
   Besson A, 2004, GENE DEV, V18, P862, DOI 10.1101/gad.1185504
   Besson A, 2006, GENE DEV, V20, P47, DOI 10.1101/gad.1384406
   Boehm M, 2002, EMBO J, V21, P3390, DOI 10.1093/emboj/cdf343
   Borriello A, 2006, CANCER RES, V66, P4240, DOI 10.1158/0008-5472.CAN-05-2759
   Borriello A, 2000, ONCOGENE, V19, P51, DOI 10.1038/sj.onc.1203231
   Borriello A, 2007, CELL CYCLE, V6, P1053, DOI 10.4161/cc.6.9.4142
   Borriello A, 2011, PLOS ONE, V6, DOI 10.1371/journal.pone.0028555
   Borriello A, 2011, EXPERT OPIN THER TAR, V15, P677, DOI 10.1517/14728222.2011.561318
   Carrano AC, 1999, NAT CELL BIOL, V1, P193, DOI 10.1038/12013
   Chopra S, 2002, J BIOL CHEM, V277, P32413, DOI 10.1074/jbc.C200311200
   Chu I, 2007, CELL, V128, P281, DOI 10.1016/j.cell.2006.11.049
   Chu IM, 2008, NAT REV CANCER, V8, P253, DOI 10.1038/nrc2347
   Ciarallo S, 2002, MOL CELL BIOL, V22, P2993, DOI 10.1128/MCB.22.9.2993-3002.2002
   Fagan-Solis KD, 2014, J CELL PHYSIOL, V229, P1160, DOI 10.1002/jcp.24545
   Fujita N, 2002, J BIOL CHEM, V277, P28706, DOI 10.1074/jbc.M203668200
   Fujita N, 2003, J BIOL CHEM, V278, P49254, DOI 10.1074/jbc.M306614200
   Ganoth D, 2001, NAT CELL BIOL, V3, P321, DOI 10.1038/35060126
   Grimmler M, 2007, CELL, V128, P269, DOI 10.1016/j.cell.2006.11.047
   Hara T, 2005, MOL CELL BIOL, V25, P9292, DOI 10.1128/MCB.25.21.9292-9303.2005
   Hong F, 2008, MOL CELL, V30, P701, DOI 10.1016/j.molcel.2008.04.027
   Ishida N, 2002, J BIOL CHEM, V277, P14355, DOI 10.1074/jbc.C100762200
   Ishida N, 2000, J BIOL CHEM, V275, P25146, DOI 10.1074/jbc.M001144200
   Jakel H, 2011, ONCOGENE, V30, P3502, DOI 10.1038/onc.2011.68
   Jakel H, 2012, CELL CYCLE, V11, P1910, DOI 10.4161/cc.19957
   James MK, 2008, MOL CELL BIOL, V28, P498, DOI 10.1128/MCB.02171-06
   Kajihara R, 2010, BIOCHEM BIOPH RES CO, V401, P350, DOI 10.1016/j.bbrc.2010.09.051
   Kamura T, 2004, NAT CELL BIOL, V6, P1229, DOI 10.1038/ncb1194
   Kardinal C, 2006, BLOOD, V107, P1133, DOI 10.1182/blood-2005-05-1771
   Katagiri K, 2011, IMMUNITY, V34, P24, DOI 10.1016/j.immuni.2010.12.010
   Kotake Y, 2005, J BIOL CHEM, V280, P1095, DOI 10.1074/jbc.M406117200
   Lacy ER, 2005, J MOL BIOL, V349, P764, DOI 10.1016/j.jmb.2005.04.019
   Lacy ER, 2004, NAT STRUCT MOL BIOL, V11, P358, DOI 10.1038/nsmb746
   Larrea MD, 2008, MOL CELL BIOL, V28, P6462, DOI 10.1128/MCB.02300-07
   Larreaa MD, 2009, P NATL ACAD SCI USA, V106, P9268, DOI 10.1073/pnas.0805057106
   Liang J, 2002, NAT MED, V8, P1153, DOI 10.1038/nm761
   Liang JY, 2007, NAT CELL BIOL, V9, P218, DOI 10.1038/ncb1537
   Malek NP, 2001, NATURE, V413, P323, DOI 10.1038/35095083
   Martin A, 2005, CANCER CELL, V7, P591, DOI 10.1016/j.ccr.2005.05.006
   Matsuda Y, 2013, INT J MOL SCI, V14, P23499, DOI 10.3390/ijms141223499
   McAllister SS, 2003, MOL CELL BIOL, V23, P216, DOI 10.1128/MCB.23.1.216-228.2003
   Mohanty AR, 2012, J BIOL CHEM, V287, P21757, DOI 10.1074/jbc.M112.346254
   Montagnoli A, 1995, GENE DEV, V3, P1181
   Morishita D, 2008, CANCER RES, V68, P5076, DOI 10.1158/0008-5472.CAN-08-0634
   Muller D, 2000, EMBO J, V19, P2168, DOI 10.1093/emboj/19.10.2168
   Nakayama K, 2004, DEV CELL, V6, P661, DOI 10.1016/S1534-5807(04)00131-5
   Nguyen L, 2006, GENE DEV, V20, P1511, DOI 10.1101/gad.377106
   PAGANO M, 1995, SCIENCE, V269, P682, DOI 10.1126/science.7624798
   Pierantoni GM, 2011, J BIOL CHEM, V286, P29005, DOI 10.1074/jbc.M111.230854
   Ray A, 2009, MOL CELL BIOL, V29, P986, DOI 10.1128/MCB.00898-08
   Rodier G, 2001, EMBO J, V20, P6672, DOI 10.1093/emboj/20.23.6672
   Santamaria D, 2007, NATURE, V448, P811, DOI 10.1038/nature06046
   Schiappacassi M, 2011, PLOS ONE, V6, DOI 10.1371/journal.pone.0017673
   Shin I, 2002, NAT MED, V8, P1145, DOI 10.1038/nm759
   Sivakolundu SG, 2005, J MOL BIOL, V353, P1118, DOI 10.1016/j.jmb.2005.08.074
   Slingerland J, 2000, J CELL PHYSIOL, V183, P10, DOI 10.1002/(SICI)1097-4652(200004)183:1<10::AID-JCP2>3.0.CO;2-I
   Smitherman M, 2000, MOL CELL BIOL, V20, P5631, DOI 10.1128/MCB.20.15.5631-5642.2000
   Uranbileg B, 2012, J BIOL CHEM, V287, P6275, DOI 10.1074/jbc.M111.318295
   Vlach J, 1997, EMBO J, V16, P5334, DOI 10.1093/emboj/16.17.5334
   Zhang WQ, 2005, BLOOD, V105, P3691, DOI 10.1182/blood-2003-07-2558
NR 62
TC 12
Z9 12
U1 0
U2 3
PU TAYLOR & FRANCIS INC
PI PHILADELPHIA
PA 530 WALNUT STREET, STE 850, PHILADELPHIA, PA 19106 USA
SN 1538-4101
EI 1551-4005
J9 CELL CYCLE
JI Cell Cycle
PD DEC 1
PY 2014
VL 13
IS 23
BP 3768
EP 3782
DI 10.4161/15384101.2014.965999
PG 15
WC Cell Biology
WE Science Citation Index Expanded (SCI-EXPANDED)
SC Cell Biology
GA AZ6KQ
UT WOS:000348329200019
PM 25483085
OA Bronze, Green Published
DA 2022-04-10
ER

PT J
AU Jain, BP
AF Jain, Buddhi Prakash
TI An Overview of Unfolded Protein Response Signaling and Its Role in
   Cancer
SO CANCER BIOTHERAPY AND RADIOPHARMACEUTICALS
LA English
DT Review
DE angiogenesis; cancer chemotherapy; endoplasmic reticulum stress;
   tumorigenesis; unfolded protein response
ID ENDOPLASMIC-RETICULUM STRESS; PLASMA-CELL DIFFERENTIATION; ER-STRESS;
   TUMOR-CELLS; HEPATOCELLULAR-CARCINOMA; SOMATIC MUTATION;
   GENE-EXPRESSION; ATF6; PATHWAY; ANGIOGENESIS
AB Secretory and transmembrane proteins undergo post-translational modification and folding in the subcellular organelle, that is, endoplasmic reticulum (ER) to become functionally active. Various factors such as high oxidative stress, low glucose, calcium imbalance, and viral infections interfere with the ER protein folding functions, leading to accumulation of unfolded and misfolded proteins that activate downstream signal transduction pathways, termed as unfolded protein response (UPR). This UPR signaling is adaptive and restored the normal function of cells by decreasing protein synthesis, increasing the folding capacity of ER and degradation of misfolded proteins. If the stress condition is overwhelmed, then UPR signaling shifts to apoptotic pathways. However, cancer cells utilized these UPR signaling for their survival and progression as an adaptive mechanism. In this review, the authors discuss about the overview of ER stress and subsequent UPR signaling and various aspects of cancer as survival, proliferation, and angiogenesis in relation to UPR. Understanding the UPR signaling in relation to cancer will be further helpful in designing therapeutics against cancer.
C1 [Jain, Buddhi Prakash] Mahatma Gandhi Cent Univ Bihar, Sch Life Sci, Dept Zool, Motihari, India.
RP Jain, BP (corresponding author), Mahatma Gandhi Cent Univ Bihar, Sch Life Sci, Dept Zool, Temp Camp 845401, Motihari, India.
EM buddhiprakash@mgcub.ac.in
OI JAIN, BUDDHI PRAKASH/0000-0002-7225-7257
CR Arap MA, 2004, CANCER CELL, V6, P275, DOI 10.1016/j.ccr.2004.08.018
   Auf G, 2010, P NATL ACAD SCI USA, V107, P15553, DOI 10.1073/pnas.0914072107
   Blais JD, 2006, MOL CELL BIOL, V26, P9517, DOI 10.1128/MCB.01145-06
   Blais JD, 2004, MOL CELL BIOL, V24, P7469, DOI 10.1128/MCB.24.17.7469-7482.2004
   Bruchmann A, 2013, BMC CANCER, V13, DOI 10.1186/1471-2407-13-96
   Chan SW, 2014, FRONT MICROBIOL, V5, DOI 10.3389/fmicb.2014.00518
   Denko NC, 2008, NAT REV CANCER, V8, P705, DOI 10.1038/nrc2468
   Drogat B, 2007, CANCER RES, V67, P6700, DOI 10.1158/0008-5472.CAN-06-3235
   Foufelle F, 2007, M S-MED SCI, V23, P291, DOI 10.1051/medsci/2007233291
   Fujimoto Takashi, 2003, Breast Cancer, V10, P301, DOI 10.1007/BF02967649
   Fung TS, 2014, FRONT MICROBIOL, V5, DOI 10.3389/fmicb.2014.00296
   de la Cadena SC, 2014, APOPTOSIS, V19, P414, DOI 10.1007/s10495-013-0930-7
   Ghosh R, 2010, PLOS ONE, V5, pA104, DOI 10.1371/journal.pone.0009575
   Gomez JA, 2016, ELIFE, V5, DOI 10.7554/eLife.20390
   Greenman C, 2007, NATURE, V446, P153, DOI 10.1038/nature05610
   Gupta S, 2009, PLOS ONE, V4, DOI 10.1371/journal.pone.0008008
   Guzel E, 2011, BIOL REPROD, V85, P121, DOI 10.1095/biolreprod.110.089532
   Harding HP, 2009, P NATL ACAD SCI USA, V106, P1832, DOI 10.1073/pnas.0809632106
   Harding HP, 2000, MOL CELL, V6, P1099, DOI 10.1016/S1097-2765(00)00108-8
   Harris AL, 2002, NAT REV CANCER, V2, P38, DOI 10.1038/nrc704
   Hart LS, 2012, J CLIN INVEST, V122, P4621, DOI 10.1172/JCI62973
   Hazari YM, 2016, TUMOR BIOL, V37, P14381, DOI 10.1007/s13277-016-5343-0
   Haze K, 1999, MOL BIOL CELL, V10, P3787, DOI 10.1091/mbc.10.11.3787
   Hetz C, 2012, NAT REV MOL CELL BIO, V13, P89, DOI 10.1038/nrm3270
   Hetz C, 2009, MOL CELL, V35, P551, DOI 10.1016/j.molcel.2009.08.021
   Hong SY, 2013, BRIT J HAEMATOL, V161, P898, DOI 10.1111/bjh.12310
   Huber AL, 2013, MOL CELL, V49, P1049, DOI 10.1016/j.molcel.2013.01.009
   Iwakoshi NN, 2003, NAT IMMUNOL, V4, P321, DOI 10.1038/ni907
   Iwawaki T, 2004, NAT MED, V10, P98, DOI 10.1038/nm970
   Jamora C, 1996, P NATL ACAD SCI USA, V93, P7690, DOI 10.1073/pnas.93.15.7690
   Kan ZY, 2010, NATURE, V466, P869, DOI 10.1038/nature09208
   Kim I, 2008, NAT REV DRUG DISCOV, V7, P1013, DOI 10.1038/nrd2755
   Koong AC, 2006, CANCER BIOL THER, V5, P756, DOI 10.4161/cbt.5.7.2973
   Koritzinsky M, 2006, EMBO J, V25, P1114, DOI 10.1038/sj.emboj.7600998
   Koritzinsky M, 2013, J CELL BIOL, V203, P615, DOI 10.1083/jcb.201307185
   Koumenis C, 2002, MOL CELL BIOL, V22, P7405, DOI 10.1128/MCB.22.21.7405-7416.2002
   Lee K, 2002, GENE DEV, V16, P452, DOI 10.1101/gad.964702
   Leung-Hagesteijn C, 2013, CANCER CELL, V24, P289, DOI 10.1016/j.ccr.2013.08.009
   Lin JH, 2007, SCIENCE, V318, P944, DOI 10.1126/science.1146361
   Liu H, 2016, EVID-BASED COMPL ALT, V2016, DOI 10.1155/2016/7831282
   Ma YJ, 2004, NAT REV CANCER, V4, P966, DOI 10.1038/nrc1505
   Mahadevan NR, 2011, P NATL ACAD SCI USA, V108, P6561, DOI 10.1073/pnas.1008942108
   Marciniak SJ, 2004, GENE DEV, V18, P3066, DOI 10.1101/gad.1250704
   McCullough KD, 2001, MOL CELL BIOL, V21, P1249, DOI 10.1128/MCB.21.4.1249-1259.2001
   Mekahli D, 2011, CSH PERSPECT BIOL, V3, DOI 10.1101/cshperspect.a004317
   Miyagi H, 2013, PLOS ONE, V8, DOI 10.1371/journal.pone.0055155
   Mkrtchian S, 2015, ENDOCR-RELAT CANCER, V22, pC1, DOI 10.1530/ERC-15-0106
   Mori K, 2015, P JPN ACAD B-PHYS, V91, P469, DOI 10.2183/pjab.91.469
   Mori K, 2009, J BIOCHEM, V146, P743, DOI 10.1093/jb/mvp166
   Nagelkerke A, 2014, BBA-REV CANCER, V1846, P277, DOI 10.1016/j.bbcan.2014.07.006
   Nagelkerke A, 2013, BREAST CANCER RES, V15, DOI 10.1186/bcr3373
   Nagy P, 2013, PLOS GENET, V9, DOI 10.1371/journal.pgen.1003664
   Nakagawa T, 2000, NATURE, V403, P98, DOI 10.1038/47513
   Obeng EA, 2006, BLOOD, V107, P4907, DOI 10.1182/blood-2005-08-3531
   Oslowski CM, 2011, METHOD ENZYMOL, V490, P71, DOI 10.1016/B978-0-12-385114-7.00004-0
   Parsons DW, 2008, SCIENCE, V321, P1807, DOI 10.1126/science.1164382
   Gavilan MP, 2009, AGING CELL, V8, P654, DOI 10.1111/j.1474-9726.2009.00519.x
   Pereira ER, 2010, PLOS ONE, V5, DOI 10.1371/journal.pone.0012521
   Pike LRG, 2013, BIOCHEM J, V449, P389, DOI 10.1042/BJ20120972
   Reimold AM, 2001, NATURE, V412, P300, DOI 10.1038/35085509
   Reva B, 2011, NUCLEIC ACIDS RES, V39, pE118, DOI 10.1093/nar/gkr407
   Romero-Ramirez L, 2009, TRANSL ONCOL, V2, P31, DOI 10.1593/tlo.08211
   Ron D, 2007, NAT REV MOL CELL BIO, V8, P519, DOI 10.1038/nrm2199
   Rouschop KM, 2013, P NATL ACAD SCI USA, V110, P4622, DOI 10.1073/pnas.1210633110
   Rutkowski DT, 2006, PLOS BIOL, V4, P2024, DOI 10.1371/journal.pbio.0040374
   Ryoo HD, 2016, FEBS J, V283, P3718, DOI 10.1111/febs.13755
   Rzymski T, 2009, CELL CYCLE, V8, P3838, DOI 10.4161/cc.8.23.10086
   Sano R, 2013, BIOCHIM BIOPHYS ACTA, P1833
   Schewe DM, 2008, P NATL ACAD SCI USA, V105, P10519, DOI 10.1073/pnas.0800939105
   Schindler AJ, 2009, P NATL ACAD SCI USA, V106, P17775, DOI 10.1073/pnas.0910342106
   Shen XH, 2005, PLOS GENET, V1, P355, DOI 10.1371/journal.pgen.0010037
   Shuda M, 2003, J HEPATOL, V38, P605, DOI 10.1016/S0168-8278(03)00029-1
   Spiotto MT, 2010, CANCER RES, V70, P78, DOI 10.1158/0008-5472.CAN-09-2747
   Tabas I, 2011, NAT CELL BIOL, V13, P184, DOI 10.1038/ncb0311-184
   Tay KH, 2014, CELL SIGNAL, V26, P287, DOI 10.1016/j.cellsig.2013.11.008
   Tsai Yien Che, 2010, Genes Cancer, V1, P764
   Tsang KY, 2007, PLOS BIOL, V5, P568, DOI 10.1371/journal.pbio.0050044
   Tsaytler P, 2011, SCIENCE, V332, P91, DOI 10.1126/science.1201396
   Vandewynckel YP, 2013, ANTICANCER RES, V33, P4683
   Walter P, 2011, SCIENCE, V334, P1081, DOI 10.1126/science.1209038
   Wang M, 2014, NAT REV CANCER, V14, P581, DOI 10.1038/nrc3800
   Wang YG, 2012, CANCER RES, V72, P5396, DOI 10.1158/0008-5472.CAN-12-0474
   Wei MC, 2001, SCIENCE, V292, P727, DOI 10.1126/science.1059108
   Wu XP, 2014, INT J CANCER, V135, P61, DOI 10.1002/ijc.28649
   Xiang CC, 2017, APOPTOSIS, V22, P1, DOI 10.1007/s10495-016-1296-4
   Yadav Raj Kumar, 2014, J Cancer Prev, V19, P75, DOI 10.15430/JCP.2014.19.2.75
   Yoneda T, 2001, J BIOL CHEM, V276, P13935, DOI 10.1074/jbc.M010677200
   Zeng LF, 2013, CIRCULATION, V127, P1712, DOI 10.1161/CIRCULATIONAHA.112.001337
   Zhang KZ, 2005, J CLIN INVEST, V115, P268, DOI 10.1172/JCI200521848
NR 89
TC 14
Z9 14
U1 1
U2 14
PU MARY ANN LIEBERT, INC
PI NEW ROCHELLE
PA 140 HUGUENOT STREET, 3RD FL, NEW ROCHELLE, NY 10801 USA
SN 1084-9785
EI 1557-8852
J9 CANCER BIOTHER RADIO
JI Cancer Biother. Radiopharm.
PD OCT
PY 2017
VL 32
IS 8
BP 275
EP 281
DI 10.1089/cbr.2017.2309
PG 7
WC Oncology; Medicine, Research & Experimental; Pharmacology & Pharmacy;
   Radiology, Nuclear Medicine & Medical Imaging
WE Science Citation Index Expanded (SCI-EXPANDED)
SC Oncology; Research & Experimental Medicine; Pharmacology & Pharmacy;
   Radiology, Nuclear Medicine & Medical Imaging
GA FK2UK
UT WOS:000413337900001
PM 29053418
DA 2022-04-10
ER

PT J
AU Maas, MN
   Hintzen, JCJ
   Porzberg, MRB
   Mecinovic, J
AF Maas, Marijn N.
   Hintzen, Jordi C. J.
   Porzberg, Miriam R. B.
   Mecinovic, Jasmin
TI Trimethyllysine: From Carnitine Biosynthesis to Epigenetics
SO INTERNATIONAL JOURNAL OF MOLECULAR SCIENCES
LA English
DT Review
DE trimethyllysine; epigenetics; post-translational modification; protein
   lysine methyltransferases; protein lysine demethylases; carnitine;
   methylation; writers; readers; erasers
ID PROTEIN LYSINE METHYLTRANSFERASES; HISTONE H3; STRUCTURAL BASIS;
   MOLECULAR-BASIS; H3K36ME3 RECOGNITION; CATALYTIC-PROPERTIES; HP1
   CHROMODOMAIN; DEMETHYLASE LSD1; TRANSITION-STATE; ADOMET ANALOG
AB Trimethyllysine is an important post-translationally modified amino acid with functions in the carnitine biosynthesis and regulation of key epigenetic processes. Protein lysine methyltransferases and demethylases dynamically control protein lysine methylation, with each state of methylation changing the biophysical properties of lysine and the subsequent effect on protein function, in particular histone proteins and their central role in epigenetics. Epigenetic reader domain proteins can distinguish between different lysine methylation states and initiate downstream cellular processes upon recognition. Dysregulation of protein methylation is linked to various diseases, including cancer, inflammation, and genetic disorders. In this review, we cover biomolecular studies on the role of trimethyllysine in carnitine biosynthesis, different enzymatic reactions involved in the synthesis and removal of trimethyllysine, trimethyllysine recognition by reader proteins, and the role of trimethyllysine on the nucleosome assembly.
C1 [Maas, Marijn N.; Hintzen, Jordi C. J.; Porzberg, Miriam R. B.; Mecinovic, Jasmin] Univ Southern Denmark, Dept Phys Chem & Pharm, Campusvej 55, DK-5230 Odense, Denmark.
RP Mecinovic, J (corresponding author), Univ Southern Denmark, Dept Phys Chem & Pharm, Campusvej 55, DK-5230 Odense, Denmark.
EM mmaas@sdu.dk; hintzen@sdu.dk; porzberg@sdu.dk; mecinovic@sdu.dk
RI ; Mecinovic, Jasmin/F-9694-2015
OI Maas, Marijn/0000-0003-2099-1035; Hintzen, Jordi/0000-0002-4621-0711;
   Mecinovic, Jasmin/0000-0002-5559-3822; Porzberg,
   Miriam/0000-0002-1163-3722
FU European Research Council (ERC)European Research Council (ERC) [715691]
FX This research was funded by the European Research Council (ERC Starting
   Grant, ChemEpigen, to J.M.), grant number 715691. The APC was funded by
   grant number 715691.
CR Al Temimi AHK, 2020, CHEM COMMUN, V56, P3039, DOI 10.1039/c9cc09098c
   Al Temimi AHK, 2020, SCI REP-UK, V10, DOI 10.1038/s41598-020-60337-3
   Al Temimi AHK, 2019, COMMUN CHEM, V2, DOI 10.1038/s42004-019-0210-8
   Al Temimi AHK, 2020, CHEMBIOCHEM, V21, P392, DOI 10.1002/cbic.201900359
   Al Temimi AHK, 2019, ORG BIOMOL CHEM, V17, P5693, DOI 10.1039/c9ob01038f
   Al Temimi AHK, 2019, BIOCONJUGATE CHEM, V30, P1798, DOI 10.1021/acs.bioconjchem.9b00313
   Al Temimi AHK, 2018, CHEM COMMUN, V54, P2409, DOI 10.1039/c8cc01009a
   Al Temimi AHK, 2017, SCI REP-UK, V7, DOI 10.1038/s41598-017-16128-4
   Al Temimi AHK, 2016, CHEM COMMUN, V52, P12849, DOI 10.1039/c6cc07845a
   Andrews FH, 2016, NAT CHEM BIOL, V12, P662, DOI [10.1038/NCHEMBIO.2149, 10.1038/nchembio.2149]
   Bannister AJ, 2011, CELL RES, V21, P381, DOI 10.1038/cr.2011.22
   Baril SA, 2017, J AM CHEM SOC, V139, P17253, DOI 10.1021/jacs.7b09223
   Baron R, 2011, STRUCTURE, V19, P212, DOI 10.1016/j.str.2011.01.001
   Beaver JE, 2016, ACS CHEM BIOL, V11, P643, DOI 10.1021/acschembio.5b00996
   Belle R, 2017, CHEM COMMUN, V53, P13264, DOI 10.1039/c7cc08028j
   Bian CB, 2011, EMBO J, V30, P2829, DOI 10.1038/emboj.2011.193
   Bischoff R, 2012, J PROTEOMICS, V75, P2275, DOI 10.1016/j.jprot.2012.01.041
   Blus BJ, 2011, CRIT REV BIOCHEM MOL, V46, P507, DOI 10.3109/10409238.2011.619164
   Boriack-Sjodin PA, 2016, BIOCHEMISTRY-US, V55, P1557, DOI 10.1021/acs.biochem.5b01129
   Bortoluzzi A, 2017, BIOCHEM J, V474, P1633, DOI 10.1042/BCJ20161053
   Bothwell IR, 2014, ORG LETT, V16, P3056, DOI 10.1021/ol501169y
   Bothwell IR, 2012, J AM CHEM SOC, V134, P14905, DOI 10.1021/ja304782r
   Buuh ZY, 2018, J MED CHEM, V61, P3239, DOI 10.1021/acs.jmedchem.6b01817
   Champagne KS, 2009, CURR DRUG target, V10, P432, DOI 10.2174/138945009788185040
   Chang BS, 2007, SCIENCE, V318, P444, DOI 10.1126/science.1145801
   Chen ZL, 2018, BIOCHEMISTRY-US, V57, P300, DOI 10.1021/acs.biochem.7b00926
   Cheng Y, 2019, SIGNAL TRANSDUCT TAR, V4, DOI 10.1038/s41392-019-0095-0
   Chinenov Y, 2002, TRENDS BIOCHEM SCI, V27, P115, DOI 10.1016/S0968-0004(02)02058-3
   Ciccone DN, 2009, NATURE, V461, P415, DOI 10.1038/nature08315
   Cistrone Philip A, 2019, Curr Protoc Chem Biol, V11, pe61, DOI 10.1002/cpch.61
   Clifton IJ, 2006, J INORG BIOCHEM, V100, P644, DOI 10.1016/j.jinorgbio.2006.01.024
   Cloos PAC, 2008, GENE DEV, V22, P1115, DOI 10.1101/gad.1652908
   Couture JF, 2007, NAT STRUCT MOL BIOL, V14, P689, DOI 10.1038/nsmb1273
   Culhane JC, 2007, CURR OPIN CHEM BIOL, V11, P561, DOI 10.1016/j.cbpa.2007.07.014
   Dadova J, 2018, CURR OPIN CHEM BIOL, V46, P71, DOI 10.1016/j.cbpa.2018.05.022
   Dambrova M, 2002, TRENDS CARDIOVAS MED, V12, P275, DOI 10.1016/S1050-1738(02)00175-5
   DAWSON PE, 1994, SCIENCE, V266, P776, DOI 10.1126/science.7973629
   Dillon SC, 2005, GENOME BIOL, V6, DOI 10.1186/gb-2005-6-8-227
   Eisert RJ, 2011, CHEMBIOCHEM, V12, P2786, DOI 10.1002/cbic.201100555
   Eustermann S, 2011, NAT STRUCT MOL BIOL, V18, P777, DOI 10.1038/nsmb.2070
   Fazius F, 2012, MOL MICROBIOL, V86, P1508, DOI 10.1111/mmi.12076
   Feng Q, 2002, CURR BIOL, V12, P1052, DOI 10.1016/S0960-9822(02)00901-6
   Forneris F, 2009, FEBS J, V276, P4304, DOI 10.1111/j.1742-4658.2009.07142.x
   Friso G, 2015, PLANT PHYSIOL, V169, P1469, DOI 10.1104/pp.15.01378
   Gallivan JP, 2000, J AM CHEM SOC, V122, P870, DOI 10.1021/ja991755c
   Ganesan A, 2019, CLIN EPIGENETICS, V11, DOI 10.1186/s13148-019-0776-0
   Gatchalian J., 2015, HISTONE RECOGNITION, P27
   Greer EL, 2012, NAT REV GENET, V13, P343, DOI 10.1038/nrg3173
   Gruber T, 2018, CHEMBIOCHEM, V19, P2324, DOI 10.1002/cbic.201800398
   Hagel JM, 2010, NAT CHEM BIOL, V6, P273, DOI [10.1038/NCHEMBIO.317, 10.1038/nchembio.317]
   He S, 2003, P NATL ACAD SCI USA, V100, P12033, DOI 10.1073/pnas.2035256100
   Hintzen JCJ, 2020, MOLECULES, V25, DOI 10.3390/molecules25081918
   Hof F, 2016, CHEM COMMUN, V52, P10093, DOI 10.1039/c6cc04771h
   Hopkinson RJ, 2018, CHEM COMMUN, V54, P7975, DOI 10.1039/c8cc04057e
   Hopkinson RJ, 2013, ANGEW CHEM INT EDIT, V52, P7709, DOI 10.1002/anie.201303282
   Hou HF, 2010, CURR OPIN STRUC BIOL, V20, P739, DOI 10.1016/j.sbi.2010.09.006
   Hsu PL, 2018, CELL, V174, P1106, DOI 10.1016/j.cell.2018.06.038
   Huang J, 2007, NATURE, V449, P105, DOI 10.1038/nature06092
   Huber TD, 2016, CURR OPIN BIOTECH, V42, P189, DOI 10.1016/j.copbio.2016.07.005
   Hudson AO, 2005, BBA-GEN SUBJECTS, V1721, P27, DOI 10.1016/j.bbagen.2004.09.008
   HULSE JD, 1978, J BIOL CHEM, V253, P1654
   Husmann D, 2019, NAT STRUCT MOL BIOL, V26, P880, DOI 10.1038/s41594-019-0298-7
   Iglesias N, 2018, NATURE, V560, P504, DOI 10.1038/s41586-018-0398-2
   Islam K, 2012, J AM CHEM SOC, V134, P5909, DOI 10.1021/ja2118333
   Islam K, 2011, ACS CHEM BIOL, V6, P679, DOI 10.1021/cb2000567
   Islam MS, 2018, ANNU REV BIOCHEM, V87, P585, DOI 10.1146/annurev-biochem-061516-044724
   Iwase S, 2011, NAT STRUCT MOL BIOL, V18, P769, DOI 10.1038/nsmb.2062
   Jacobs SA, 2002, SCIENCE, V295, P2080, DOI 10.1126/science.1069473
   Johansson C, 2014, EPIGENOMICS-UK, V6, P89, DOI 10.2217/epi.13.79
   Juaristi E., 2016, ENCY PHYS ORGANIC CH, DOI [10.1002/9781118468586.epoc3001, DOI 10.1002/9781118468586.EPOC3001]
   Justin, 2015, HISTONE RECOGNITION, V10, P83, DOI [10.1007/978-3-319-18102-8_4, DOI 10.1007/978-3-319-18102-8_4]
   Kamps JJAG, 2015, NAT COMMUN, V6, DOI 10.1038/ncomms9911
   Kawakami T, 2013, B CHEM SOC JPN, V86, P690, DOI 10.1246/bcsj.20130026
   Kazaks A, 2014, PROTEIN EXPRES PURIF, V104, P1, DOI 10.1016/j.pep.2014.09.002
   Klimasauskas S, 2007, TRENDS BIOTECHNOL, V25, P99, DOI 10.1016/j.tibtech.2007.01.006
   Kontaki H, 2010, MOL CELL, V39, P152, DOI 10.1016/j.molcel.2010.06.006
   Kooistra SM, 2012, NAT REV MOL CELL BIO, V13, P297, DOI 10.1038/nrm3327
   Kouzarides T, 2007, CELL, V128, P693, DOI 10.1016/j.cell.2007.02.005
   Krone MW, 2020, CHEM SCI, V11, P3495, DOI 10.1039/d0sc00227e
   Langley GW, 2016, ACS CHEM BIOL, V11, P755, DOI 10.1021/acschembio.5b00738
   Lanouette S, 2014, MOL SYST BIOL, V10, DOI 10.1002/msb.134974
   Lee YJ, 2016, CHEM COMMUN, V52, P12606, DOI 10.1039/c6cc05959g
   Lenstra DC, 2018, BIOORG MED CHEM LETT, V28, P1234, DOI 10.1016/j.bmcl.2018.02.043
   Lesniak RK, 2017, CHEM COMMUN, V53, P440, DOI 10.1039/c6cc08381a
   Leung IKH, 2010, CHEM BIOL, V17, P1316, DOI 10.1016/j.chembiol.2010.09.016
   Li JB, 2014, ORG BIOMOL CHEM, V12, P5435, DOI 10.1039/c4ob00715h
   Linscott JA, 2016, P NATL ACAD SCI USA, V113, pE8369, DOI 10.1073/pnas.1609032114
   Lu R, 2013, TRENDS BIOCHEM SCI, V38, P546, DOI 10.1016/j.tibs.2013.08.002
   Lu X, 2008, NAT STRUCT MOL BIOL, V15, P1122, DOI 10.1038/nsmb.1489
   Luo M, 2018, CHEM REV, V118, P6656, DOI 10.1021/acs.chemrev.8b00008
   Martin C, 2005, NAT REV MOL CELL BIO, V6, P838, DOI 10.1038/nrm1761
   Martinez S, 2015, J BIOL CHEM, V290, P20702, DOI 10.1074/jbc.R115.648691
   McDonough MA, 2010, CURR OPIN STRUC BIOL, V20, P659, DOI 10.1016/j.sbi.2010.08.006
   Min JR, 2003, CELL, V112, P711, DOI 10.1016/S0092-8674(03)00114-4
   Mosammaparast N, 2010, ANNU REV BIOCHEM, V79, P155, DOI 10.1146/annurev.biochem.78.070907.103946
   Muller MM, 2015, CHEM REV, V115, P2296, DOI 10.1021/cr5003529
   Muir TW, 2003, ANNU REV BIOCHEM, V72, P249, DOI 10.1146/annurev.biochem.72.121801.161900
   Munari F, 2012, J BIOL CHEM, V287, P33756, DOI 10.1074/jbc.M112.390849
   Musselman CA, 2014, BBA-GENE REGUL MECH, V1839, P686, DOI 10.1016/j.bbagrm.2014.04.001
   Musselman CA, 2012, NAT STRUCT MOL BIOL, V19, P1218, DOI 10.1038/nsmb.2436
   Musselman CA, 2012, NAT STRUCT MOL BIOL, V19, P1266, DOI 10.1038/nsmb.2435
   National Center for Biotechnology Information, 2020, PUBCHEM COMP SUMM CI
   Ng SS, 2007, NATURE, V448, P87, DOI 10.1038/nature05971
   Nguyen DP, 2010, CHEM BIOL, V17, P1072, DOI 10.1016/j.chembiol.2010.07.013
   Nguyen DP, 2009, J AM CHEM SOC, V131, P14194, DOI 10.1021/ja906603s
   Nielsen PR, 2005, J BIOL CHEM, V280, P32326, DOI 10.1074/jbc.M501347200
   NOVAK RF, 1980, BIOCHEM J, V188, P521, DOI 10.1042/bj1880521
   Patnaik S, 2019, FRONT PHARMACOL, V10, DOI 10.3389/fphar.2019.00588
   Pena PV, 2006, NATURE, V442, P100, DOI 10.1038/nature04814
   Peters W, 2010, ANGEW CHEM INT EDIT, V49, P5170, DOI 10.1002/anie.201001240
   Piao L, 2016, ONCOTARGET, V7, P22846, DOI 10.18632/oncotarget.8072
   Pieters B, 2013, CHEMBIOCHEM, V14, P2408, DOI 10.1002/cbic.201300525
   Pieters BJGE, 2020, COMMUN CHEM, V3, DOI 10.1038/s42004-020-0313-2
   Pieters BJGE, 2019, BIOCONJUGATE CHEM, V30, P952, DOI 10.1021/acs.bioconjchem.9b00065
   Pieters BJGE, 2015, PLOS ONE, V10, DOI 10.1371/journal.pone.0139205
   Porzberg MRB, 2019, RNA TECHNOL, P435, DOI 10.1007/978-3-030-14792-1_17
   Poulin MB, 2016, P NATL ACAD SCI USA, V113, P1197, DOI 10.1073/pnas.1521036113
   Qian C, 2006, CELL MOL LIFE SCI, V63, P2755, DOI 10.1007/s00018-006-6274-5
   Qin S, 2014, TRENDS BIOCHEM SCI, V39, P536, DOI 10.1016/j.tibs.2014.09.001
   Rasool M, 2015, BMC MED GENOMICS, V8, DOI 10.1186/1755-8794-8-S1-S5
   Raunser S, 2009, P NATL ACAD SCI USA, V106, P3160, DOI 10.1073/pnas.0810563106
   Reddy YV, 2017, ORG BIOMOL CHEM, V15, P1350, DOI 10.1039/c6ob02683d
   Reddy YV, 2017, ORG LETT, V19, P400, DOI 10.1021/acs.orglett.6b03608
   Richards EJ, 2002, CELL, V108, P489, DOI 10.1016/S0092-8674(02)00644-X
   Rona Germana B, 2016, Biophys Rev, V8, P63, DOI 10.1007/s12551-015-0190-6
   Ruthenburg AJ, 2011, CELL, V145, P692, DOI 10.1016/j.cell.2011.03.053
   Rydzik AM, 2014, CHEM COMMUN, V50, P1175, DOI 10.1039/c3cc47581f
   Rydzik AM, 2012, CHEMBIOCHEM, V13, P1559, DOI 10.1002/cbic.201200256
   SACHAN DS, 1980, BIOCHEM J, V188, P529, DOI 10.1042/bj1880529
   Sanchez R, 2011, TRENDS BIOCHEM SCI, V36, P364, DOI 10.1016/j.tibs.2011.03.005
   Schapira Matthieu, 2011, Curr Chem Genomics, V5, P85, DOI 10.2174/1875397301005010085
   Schmidt J. R., 2019, WEBMO ENTERPRISE VER
   Schuhmacher MK, 2015, BBA-GENE REGUL MECH, V1849, P55, DOI 10.1016/j.bbagrm.2014.11.005
   Seeliger D, 2012, ACS CHEM BIOL, V7, P150, DOI 10.1021/cb200363r
   Servillo L, 2014, PLOS ONE, V9, DOI 10.1371/journal.pone.0084589
   Sheehan D., 2011, CHEMBIOCHEM, V12, P1603, DOI [10.1002/cbic.201100254, DOI 10.1002/CBIC.201100254]
   Shi Y, 2007, MOL CELL, V25, P1, DOI 10.1016/j.molcel.2006.12.010
   Shi YJ, 2004, CELL, V119, P941, DOI 10.1016/j.cell.2004.12.012
   Shiau C, 2013, CHEM BIOL, V20, P494, DOI 10.1016/j.chembiol.2013.03.008
   Simon MD, 2007, CELL, V128, P1003, DOI 10.1016/j.cell.2006.12.041
   Sims RJ, 2006, GENE DEV, V20, P2779, DOI 10.1101/gad.1468206
   Smith BC, 2009, BBA-GENE REGUL MECH, V1789, P45, DOI 10.1016/j.bbagrm.2008.06.005
   Stavropoulos P, 2006, NAT STRUCT MOL BIOL, V13, P626, DOI 10.1038/nsmb1113
   Strahl BD, 2000, NATURE, V403, P41, DOI 10.1038/47412
   Strijbis K, 2010, IUBMB LIFE, V62, P357, DOI 10.1002/iub.323
   Su XN, 2014, GENE DEV, V28, P622, DOI 10.1101/gad.233239.113
   Tars K, 2014, J MED CHEM, V57, P2213, DOI 10.1021/jm401603e
   Taverna SD, 2007, NAT STRUCT MOL BIOL, V14, P1025, DOI 10.1038/nsmb1338
   Teske KA, 2017, EUR J MED CHEM, V136, P14, DOI 10.1016/j.ejmech.2017.04.047
   Thinnes CC, 2014, BBA-GENE REGUL MECH, V1839, P1416, DOI 10.1016/j.bbagrm.2014.05.009
   Tome D, 2007, J NUTR, V137, p1642S, DOI 10.1093/jn/137.6.1642S
   Trievel RC, 2003, NAT STRUCT BIOL, V10, P545, DOI 10.1038/nsb946
   Tsukada Y, 2006, NATURE, V439, P811, DOI 10.1038/nature04433
   Upadhyay AK, 2011, CURR OPIN STRUC BIOL, V21, P750, DOI 10.1016/j.sbi.2011.08.003
   Valencia-Sanchez MI, 2019, MOL CELL, V74, P1010, DOI 10.1016/j.molcel.2019.03.029
   Vaz FM, 2002, BIOCHEM J, V361, P417, DOI 10.1042/0264-6021:3610417
   Vaz FM, 2001, J BIOL CHEM, V276, P33512, DOI 10.1074/jbc.M105929200
   Velasco AM, 2002, J MOL EVOL, V55, P445, DOI 10.1007/s00239-002-2340-2
   Vezzoli A, 2010, NAT STRUCT MOL BIOL, V17, P617, DOI 10.1038/nsmb.1797
   Wagner T, 2014, CHEMMEDCHEM, V9, P466, DOI 10.1002/cmdc.201300422
   Walport LJ, 2016, NAT COMMUN, V7, DOI 10.1038/ncomms11974
   Walport LJ, 2012, CURR OPIN CHEM BIOL, V16, P525, DOI 10.1016/j.cbpa.2012.09.015
   Wang J, 2009, NAT GENET, V41, P125, DOI 10.1038/ng.268
   Wang R, 2013, J AM CHEM SOC, V135, P1048, DOI 10.1021/ja309412s
   Wang YL, 2019, BIOCHEM J, V476, P1109, DOI 10.1042/BCJ20180857
   Wang ZPA, 2017, CHEM-EUR J, V23, P11732, DOI 10.1002/chem.201701655
   Willnow S, 2012, CHEMBIOCHEM, V13, P1167, DOI 10.1002/cbic.201100781
   Wojcieszynska D, 2012, INT J MOL SCI, V13, P16751, DOI 10.3390/ijms131216751
   Wu H, 2011, PLOS ONE, V6, DOI 10.1371/journal.pone.0018919
   Wu H, 2010, PLOS ONE, V5, DOI [10.1371/journal.pone.0008570, 10.1371/journal.pone.0013316]
   Xiao B, 2003, NATURE, V421, P652, DOI 10.1038/nature01378
   Xu C., 2015, HISTONE RECOGNITION, P49
   Xu C, 2010, P NATL ACAD SCI USA, V107, P19266, DOI 10.1073/pnas.1008937107
   Yang MJ, 2006, MOL CELL, V23, P377, DOI 10.1016/j.molcel.2006.07.012
   Yang MJ, 2007, NAT STRUCT MOL BIOL, V14, P535, DOI 10.1038/nsmb1255
   Yun MY, 2011, CELL RES, V21, P564, DOI 10.1038/cr.2011.42
   Zhang J, 2019, MOL MED REP, V19, P3963, DOI 10.3892/mmr.2019.10111
   Zhang J, 2016, ACS CHEM BIOL, V11, P583, DOI 10.1021/acschembio.5b00812
   Zhang P, 2015, GENE DEV, V29, P123, DOI 10.1101/gad.254870.114
   Zhang X, 2003, MOL CELL, V12, P177, DOI 10.1016/S1097-2765(03)00224-7
   Zhang Y, 2015, STRUCTURE, V23, P1921, DOI 10.1016/j.str.2015.07.018
   Zhou JS, 2007, NAT STRUCT MOL BIOL, V14, P1070, DOI 10.1038/nsmb1323
NR 182
TC 5
Z9 5
U1 3
U2 9
PU MDPI
PI BASEL
PA ST ALBAN-ANLAGE 66, CH-4052 BASEL, SWITZERLAND
EI 1422-0067
J9 INT J MOL SCI
JI Int. J. Mol. Sci.
PD DEC
PY 2020
VL 21
IS 24
AR 9451
DI 10.3390/ijms21249451
PG 34
WC Biochemistry & Molecular Biology; Chemistry, Multidisciplinary
WE Science Citation Index Expanded (SCI-EXPANDED)
SC Biochemistry & Molecular Biology; Chemistry
GA PL1XN
UT WOS:000602923600001
PM 33322546
OA gold, Green Published
DA 2022-04-10
ER

PT J
AU Zan, H
   Casali, P
AF Zan, Hong
   Casali, Paolo
TI Epigenetics of Peripheral B-Cell Differentiation and the Antibody
   Response
SO FRONTIERS IN IMMUNOLOGY
LA English
DT Review
DE AID; B cell; Blimp-1; class switch DNA recombination; epigenetics;
   histone post-translational modification; memory B cell; microRNA; plasma
   cell differentiation; somatic hypermutation
ID INDUCED CYTIDINE DEAMINASE; RNA-POLYMERASE-II; SWITCH DNA RECOMBINATION;
   SYSTEMIC-LUPUS-ERYTHEMATOSUS; CIS-REGULATORY ELEMENTS; LONG NONCODING
   RNA; HISTONE DEACETYLASE; SOMATIC HYPERMUTATION; AID EXPRESSION; IN-VIVO
[truncated: 4,633,787 more chars]
