# Supplementary material for: The Global research of protein post-translational modifications in the cancer field: A bibliometric and visualized study
Source: Frontiers journal article supplement (doi:10.3389/fonc.2022.978464), 2022-11-03
Supplement: Data_Sheet_1.zip [file Editorial 4.DOC]

FN Clarivate Analytics Web of Science
VR 1.0
PT J
AU Nguyen, DX
   Baglia, LA
   Huang, SM
   Baker, CM
   McCance, DJ
AF Nguyen, DX
   Baglia, LA
   Huang, SM
   Baker, CM
   McCance, DJ
TI Acetylation regulates the differentiation-specific functions of the
   retinoblastoma protein
SO EMBO JOURNAL
LA English
DT Article
DE acetylation; differentiation; P/CAF; retinoblastoma protein
ID CREB-BINDING PROTEIN/P300; SKELETAL-MUSCLE CELLS; HISTONE
   ACETYLTRANSFERASE; TARGETED DISRUPTION; TUMOR-SUPPRESSOR; MICE LACKING;
   G(1) CONTROL; MYOD; RB; P300
AB The retinoblastoma tumor-suppressor protein (pRb) is known to induce growth arrest and cellular differentiation. The molecular determinants of pRb function include protein-protein interaction and post-translational modification such as phosphorylation. Recently, the co-activator p300 was found to acetylate pRb. The biological significance of pRb acetylation, however, remains unclear. In the present study, we provide evidence that pRb undergoes acetylation upon cellular differentiation, including skeletal myogenesis. In addition to p300, the p300-Associated Factor (P/CAF) can mediate pRb acetylation as pRb interacts directly with the acetyltransferase domain of P/CAF in vitro and can associate with P/CAF in differentiated cells. Significantly, by using a C terminal acetylation-impaired mutant of pRb, we reveal that acetylation does not affect pRb-dependent growth arrest or the repression of E2F transcriptional activity. Instead, acetylation is required for pRb-mediated terminal cell cycle exit and the induction of late myogenic gene expression. Based on these results, we propose that acetylation regulates the differentiation-specific function(s) of pRb.
C1 Univ Rochester, Sch Med & Dent, Dept Microbiol & Immunol, Rochester, NY 14642 USA.
   Univ Rochester, Ctr Canc, Rochester, NY USA.
RP McCance, DJ (corresponding author), Univ Rochester, Sch Med & Dent, Dept Microbiol & Immunol, 601 Elmwood Ave,Box 672, Rochester, NY 14642 USA.
EM djmc@mail.rochester.edu
FU NIAID NIH HHSUnited States Department of Health & Human ServicesNational
   Institutes of Health (NIH) - USANIH National Institute of Allergy &
   Infectious Diseases (NIAID) [AI 30798, R01 AI030798] Funding Source:
   Medline; NATIONAL INSTITUTE OF ALLERGY AND INFECTIOUS DISEASESUnited
   States Department of Health & Human ServicesNational Institutes of
   Health (NIH) - USANIH National Institute of Allergy & Infectious
   Diseases (NIAID) [R01AI030798] Funding Source: NIH RePORTER
CR Bannister AJ, 1996, NATURE, V384, P641, DOI 10.1038/384641a0
   Brehm A, 1998, NATURE, V391, P597, DOI 10.1038/35404
   BUCHKOVICH K, 1989, CELL, V58, P1097, DOI 10.1016/0092-8674(89)90508-4
   Chan HM, 2001, NAT CELL BIOL, V3, P667, DOI 10.1038/35083062
   CHEN PL, 1989, CELL, V58, P1193, DOI 10.1016/0092-8674(89)90517-5
   Chen TT, 2000, MOL CELL BIOL, V20, P5571, DOI 10.1128/MCB.20.15.5571-5580.2000
   CLARKE AR, 1992, NATURE, V359, P328, DOI 10.1038/359328a0
   Classon M, 2001, EXP CELL RES, V264, P135, DOI 10.1006/excr.2000.5135
   Classon M, 2000, P NATL ACAD SCI USA, V97, P10820, DOI 10.1073/pnas.190343497
   Cobrinik D, 1996, GENE DEV, V10, P1633, DOI 10.1101/gad.10.13.1633
   Dannenberg JH, 2000, GENE DEV, V14, P3051, DOI 10.1101/gad.847700
   DIGNAM JD, 1983, METHOD ENZYMOL, V101, P582
   DYNLACHT BD, 1994, GENE DEV, V8, P1772, DOI 10.1101/gad.8.15.1772
   Dyson N, 1998, GENE DEV, V12, P2245, DOI 10.1101/gad.12.15.2245
   Eckner R, 1996, GENE DEV, V10, P2478, DOI 10.1101/gad.10.19.2478
   Goodman RH, 2000, GENE DEV, V14, P1553
   Grossman SR, 1998, MOL CELL, V2, P405, DOI 10.1016/S1097-2765(00)80140-9
   GU W, 1993, CELL, V72, P309, DOI 10.1016/0092-8674(93)90110-C
   Guo CS, 2003, J BIOL CHEM, V278, P22615, DOI 10.1074/jbc.M301943200
   Hanahan D, 2000, CELL, V100, P57, DOI 10.1016/S0092-8674(00)81683-9
   Harbour JW, 2000, GENE DEV, V14, P2393, DOI 10.1101/gad.813200
   Huang SM, 2002, J VIROL, V76, P8710, DOI 10.1128/JVI.76.17.8710-8721.2002
   JACKS T, 1992, NATURE, V359, P295, DOI 10.1038/359295a0
   Kawabata H, 2002, J BIOL CHEM, V277, P8099, DOI 10.1074/jbc.M108250200
   Kouzarides T, 2000, EMBO J, V19, P1176, DOI 10.1093/emboj/19.6.1176
   LeCouter JE, 1998, DEVELOPMENT, V125, P4669
   LeCouter JE, 1998, MOL CELL BIOL, V18, P7455, DOI 10.1128/MCB.18.12.7455
   LEE EYHP, 1992, NATURE, V359, P288, DOI 10.1038/359288a0
   Lee MH, 1996, GENE DEV, V10, P1621, DOI 10.1101/gad.10.13.1621
   Li FQ, 2000, MOL CELL BIOL, V20, P5129, DOI 10.1128/MCB.20.14.5129-5139.2000
   Liu L, 1999, MOL CELL BIOL, V19, P1202
   MacLellan WR, 2000, MOL CELL BIOL, V20, P8903, DOI 10.1128/MCB.20.23.8903-8915.2000
   Magnaghi-Jaulin L, 1998, NATURE, V391, P601, DOI 10.1038/35410
   Martinez-Balbas MA, 2000, EMBO J, V19, P662, DOI 10.1093/emboj/19.4.662
   McKinsey TA, 2001, CURR OPIN GENET DEV, V11, P497, DOI 10.1016/S0959-437X(00)00224-0
   Miyake S, 2000, MOL CELL BIOL, V20, P8889, DOI 10.1128/MCB.20.23.8889-8902.2000
   Nead MA, 1998, EMBO J, V17, P2342, DOI 10.1093/emboj/17.8.2342
   Novitch BG, 1996, J CELL BIOL, V135, P441, DOI 10.1083/jcb.135.2.441
   Ogryzko VV, 1996, CELL, V87, P953, DOI 10.1016/S0092-8674(00)82001-2
   Peschiaroli A, 2002, ONCOGENE, V21, P8114, DOI 10.1038/sj.onc.1206010
   Polesskaya A, 2000, J BIOL CHEM, V275, P34359, DOI 10.1074/jbc.M003815200
   Polesskaya A, 2001, J BIOL CHEM, V276, P44502, DOI 10.1074/jbc.M106501200
   Polesskaya A, 2001, MOL CELL BIOL, V21, P5312, DOI 10.1128/MCB.21.16.5312-5320.2001
   Polesskaya A, 2001, EMBO J, V20, P6816, DOI 10.1093/emboj/20.23.6816
   Puri PL, 1997, MOL CELL, V1, P35, DOI 10.1016/S1097-2765(00)80005-2
   Puri PL, 2001, MOL CELL, V8, P885, DOI 10.1016/S1097-2765(01)00373-2
   Reid JL, 1998, EMBO J, V17, P4469, DOI 10.1093/emboj/17.15.4469
   Ruesch MN, 1998, VIROLOGY, V250, P19, DOI 10.1006/viro.1998.9359
   Sage J, 2000, GENE DEV, V14, P3037, DOI 10.1101/gad.843200
   Sartorelli V, 1999, MOL CELL, V4, P725, DOI 10.1016/S1097-2765(00)80383-4
   Sartorelli V, 1997, MOL CELL BIOL, V17, P1010, DOI 10.1128/MCB.17.2.1010
   Schiltz RL, 2000, BBA-REV CANCER, V1470, pM37, DOI 10.1016/S0304-419X(99)00037-2
   SCHNEIDER JW, 1994, SCIENCE, V264, P1467, DOI 10.1126/science.8197461
   Sellers WR, 1998, GENE DEV, V12, P95, DOI 10.1101/gad.12.1.95
   Vo N, 2001, J BIOL CHEM, V276, P13505, DOI 10.1074/jbc.R000025200
   Westbrook TF, 2002, MOL CELL BIOL, V22, P7041, DOI 10.1128/MCB.22.20.7041-7052.2002
   XIAO ZX, 1995, NATURE, V375, P694, DOI 10.1038/375694a0
   Yamasaki L, 1998, NAT GENET, V18, P360, DOI 10.1038/ng0498-360
   Yang XJ, 1996, NATURE, V382, P319, DOI 10.1038/382319a0
   Yuan WC, 1996, J BIOL CHEM, V271, P9009, DOI 10.1074/jbc.271.15.9009
   Zacksenhaus E, 1996, GENE DEV, V10, P3051, DOI 10.1101/gad.10.23.3051
NR 61
TC 73
Z9 77
U1 0
U2 4
PU WILEY
PI HOBOKEN
PA 111 RIVER ST, HOBOKEN 07030-5774, NJ USA
SN 0261-4189
EI 1460-2075
J9 EMBO J
JI Embo J.
PD APR 7
PY 2004
VL 23
IS 7
BP 1609
EP 1618
DI 10.1038/sj.emboj.7600176
PG 10
WC Biochemistry & Molecular Biology; Cell Biology
WE Science Citation Index Expanded (SCI-EXPANDED)
SC Biochemistry & Molecular Biology; Cell Biology
GA 819QC
UT WOS:000221328700020
PM 15044952
OA Green Published
DA 2022-04-10
ER

PT J
AU Souza, BK
   Freire, NH
   Jaeger, M
   de Farias, CB
   Brunetto, AL
   Brunetto, AT
   Roesler, R
AF Souza, Barbara Kunzler
   Freire, Natalia Hogetop
   Jaeger, Mariane
   de Farias, Caroline Brunetto
   Brunetto, Algemir L.
   Brunetto, Andre T.
   Roesler, Rafael
TI EHMT2/G9a as an Epigenetic Target in Pediatric and Adult Brain Tumors
SO INTERNATIONAL JOURNAL OF MOLECULAR SCIENCES
LA English
DT Review
DE G9a; EHMT2; glioblastoma; medulloblastoma; epigenetic; brain tumor
ID METHYLTRANSFERASE G9A INHIBITORS; HISTONE METHYLTRANSFERASE; DNA
   METHYLATION; INTRACRANIAL NEUROBLASTOMA; MEDULLOBLASTOMA; H3K9; GENE;
   GLIOMA; DISCOVERY; MECHANISM
AB Epigenetic mechanism, including post-translational modification of DNA and histones that influence chromatin structure, regulate gene expression during normal development and are also involved in carcinogenesis and cancer progression. The histone methyltransferase G9a (euchromatic histone lysine methyltransferase 2, EHMT2), which mostly mediates mono- and dimethylation by histone H3 lysine 9 (H3K9), influences gene expression involved in embryonic development and tissue differentiation. Overexpression of G9a has been observed in several cancer types, and different classes of G9a inhibitors have been developed as potential anticancer agents. Here, we review the emerging evidence suggesting the involvement of changes in G9a activity in brain tumors, namely glioblastoma (GBM), the main type of primary malignant brain cancer in adults, and medulloblastoma (MB), the most common type of malignant brain cancer in children. We also discuss the role of G9a in neuroblastoma (NB) and the drug development of G9a inhibitors.</p>
C1 [Souza, Barbara Kunzler; Freire, Natalia Hogetop; Jaeger, Mariane; de Farias, Caroline Brunetto; Brunetto, Algemir L.; Brunetto, Andre T.; Roesler, Rafael] Univ Fed Rio Grande do Sul, Canc & Neurobiol Lab, Expt Res Ctr, Clin Hosp CPE HCPA, BR-90035003 Porto Alegre, RS, Brazil.
   [Souza, Barbara Kunzler] Epigen Biosci, BR-92035000 Canoas, Brazil.
   [Jaeger, Mariane; de Farias, Caroline Brunetto; Brunetto, Algemir L.; Brunetto, Andre T.] Childrens Canc Inst, BR-90620110 Porto Alegre, RS, Brazil.
   [Roesler, Rafael] Univ Fed Rio Grande do Sul, Inst Basic Hlth Sci, Dept Pharmacol, BR-90050170 Porto Alegre, RS, Brazil.
RP Souza, BK; Roesler, R (corresponding author), Univ Fed Rio Grande do Sul, Canc & Neurobiol Lab, Expt Res Ctr, Clin Hosp CPE HCPA, BR-90035003 Porto Alegre, RS, Brazil.; Souza, BK (corresponding author), Epigen Biosci, BR-92035000 Canoas, Brazil.; Roesler, R (corresponding author), Univ Fed Rio Grande do Sul, Inst Basic Hlth Sci, Dept Pharmacol, BR-90050170 Porto Alegre, RS, Brazil.
EM barbara@epigenica.com.br; nfreire@hcpa.edu.br; labpesquisa1@ici.ong;
   labpesquisa@ici.ong; brunettoa@hotmail.com; andrebrunetto@ici.ong;
   rafaelroesler@hcpa.edu.br
OI Roesler, Rafael/0000-0001-6016-2261
FU National Council for Scientific and Technological Development (CNPq,
   MCTI, Brazil)Conselho Nacional de Desenvolvimento Cientifico e
   Tecnologico (CNPQ)Fundacao de Apoio a Pesquisa do Distrito Federal
   (FAPDF) [407765/2017-4, 305647/2019-9]; Rio Grande do Sul State Research
   Foundation (FAPERGS, RS, Brazil) [17/2551-0001 071-0]; Childrens Cancer
   Institute; Epigenica Biosciences
FX The writing of this article was supported by the National Council for
   Scientific and Technological Development (CNPq, MCTI, Brazil) grants
   407765/2017-4 and 305647/2019-9 and (R.R.); Rio Grande do Sul State
   Research Foundation (FAPERGS, RS, Brazil) grant 17/2551-0001 071-0
   (R.R.); the Childrens Cancer Institute; Epigenica Biosciences (B.K.S.).
CR Abballe L, 2021, WORLD J STEM CELLS, V13, P670, DOI 10.4252/wjsc.v13.i7.670
   Ahmad F, 2016, INT J BIOCHEM CELL B, V78, P87, DOI 10.1016/j.biocel.2016.07.009
   Almeida VR, 2017, MOL NEUROBIOL, V54, P7610, DOI 10.1007/s12035-016-0250-3
   Bao L, 2018, NUCLEIC ACIDS RES, V46, P6576, DOI 10.1093/nar/gky449
   Bates SE, 2020, NEW ENGL J MED, V383, P650, DOI 10.1056/NEJMra1805035
   Baxter E, 2014, CELL BIOSCI, V4, DOI 10.1186/2045-3701-4-45
   Bellamy J, 2020, FRONT ONCOL, V10, DOI 10.3389/fonc.2020.00818
   Bittencourt D, 2012, P NATL ACAD SCI USA, V109, P19673, DOI 10.1073/pnas.1211803109
   Brodeur GM, 2003, NAT REV CANCER, V3, P203, DOI 10.1038/nrc1014
   Brown SE, 2001, MAMM GENOME, V12, P916, DOI 10.1007/s00335-001-3029-3
   Cao H, 2019, EUR J MED CHEM, V179, P537, DOI 10.1016/j.ejmech.2019.06.072
   Cartron PF, 2013, MOL ONCOL, V7, P452, DOI 10.1016/j.molonc.2012.11.004
   Casciello F, 2015, FRONT IMMUNOL, V6, DOI 10.3389/fimmu.2015.00487
   Cavalli FMG, 2017, CANCER CELL, V31, P737, DOI 10.1016/j.ccell.2017.05.005
   Charles MRC, 2021, ACS OMEGA, V6, P6100, DOI 10.1021/acsomega.0c04710
   Charles MRC, 2020, BIOCHIMIE, V168, P220, DOI 10.1016/j.biochi.2019.11.006
   Charles MRC, 2019, J BIOMOL STRUCT DYN, V37, P2581, DOI 10.1080/07391102.2018.1491422
   Charles MRC, 2019, FUTURE MED CHEM, V11, P993, DOI 10.4155/fmc-2018-0396
   Chaturvedi CP, 2009, P NATL ACAD SCI USA, V106, P18303, DOI 10.1073/pnas.0906769106
   Chen J, 2018, J COMPUT AID MOL DES, V32, P917, DOI 10.1007/s10822-018-0156-4
   Chen MW, 2010, CANCER RES, V70, P7830, DOI 10.1158/0008-5472.CAN-10-0833
   Chen WL, 2017, CURR CANCER DRUG TAR, V17, P555, DOI 10.2174/1568009616666160512145303
   Chen WL, 2016, BIOORGAN MED CHEM, V24, P6102, DOI 10.1016/j.bmc.2016.09.071
   Ciechomska IA, 2020, ADV EXP MED BIOL, V1202, P259, DOI 10.1007/978-3-030-30651-9_13
   Ciechomska IA, 2018, FRONT PHARMACOL, V9, DOI 10.3389/fphar.2018.01271
   Ciechomska IA, 2016, SCI REP-UK, V6, DOI 10.1038/srep38723
   Dobson THW, 2017, MOL CANCER RES, V15, P1073, DOI 10.1158/1541-7786.MCR-16-0424
   Egger G, 2004, NATURE, V429, P457, DOI 10.1038/nature02625
   Ellis L, 2009, MOL CANCER THER, V8, P1409, DOI 10.1158/1535-7163.MCT-08-0860
   Feng TT, 2014, MED CHEM, V10, P426, DOI 10.2174/15734064113096660068
   Fetahu IS, 2021, CANCER METAST REV, V40, P173, DOI 10.1007/s10555-020-09946-y
   Fujishiro S, 2013, BIOORG MED CHEM LETT, V23, P733, DOI 10.1016/j.bmcl.2012.11.087
   Ghildiyal R, 2017, CYTOKINE, V89, P185, DOI 10.1016/j.cyto.2015.12.008
   Guo AS, 2016, MOL MED REP, V14, P4613, DOI 10.3892/mmr.2016.5815
   Gursoy-Yuzugullu O, 2017, ONCOTARGET, V8, P24518, DOI 10.18632/oncotarget.15543
   Hoebeeck J, 2009, CANCER LETT, V273, P336, DOI 10.1016/j.canlet.2008.08.019
   Hua KT, 2014, MOL CANCER, V13, DOI 10.1186/1476-4598-13-189
   Jaeger MD, 2020, J MOL NEUROSCI, V70, P981, DOI 10.1007/s12031-020-01505-y
   Jan S, 2021, EUR J PHARMACOL, V893, DOI 10.1016/j.ejphar.2020.173827
   Ke XX, 2020, FRONT CELL DEV BIOL, V8, DOI 10.3389/fcell.2020.593964
   Ke XX, 2014, PLOS ONE, V9, DOI 10.1371/journal.pone.0106962
   Kondengaden SM, 2016, EUR J MED CHEM, V122, P382, DOI 10.1016/j.ejmech.2016.06.028
   Kouzarides T, 2007, CELL, V128, P693, DOI 10.1016/j.cell.2007.02.005
   Kunadis E, 2021, PHARMACOL THERAPEUT, V220, DOI 10.1016/j.pharmthera.2020.107721
   Lawlor ER, 2012, CLIN CANCER RES, V18, P2768, DOI 10.1158/1078-0432.CCR-11-1921
   Lee DY, 2006, J BIOL CHEM, V281, P8476, DOI 10.1074/jbc.M511093200
   Lehnertz B, 2003, CURR BIOL, V13, P1192, DOI 10.1016/S0960-9822(03)00432-9
   Li Q, 2018, J EXP CLIN CANC RES, V37, DOI 10.1186/s13046-018-0941-x
   Liu F, 2011, J MED CHEM, V54, P6139, DOI 10.1021/jm200903z
   Liu F, 2010, J MED CHEM, V53, P5844, DOI 10.1021/jm100478y
   Lopez-Lopez E, 2020, J COMPUT AID MOL DES, V34, P659, DOI 10.1007/s10822-020-00298-x
   Lujambio A, 2010, ONCOGENE, V29, P6390, DOI 10.1038/onc.2010.361
   Maris JM, 2007, LANCET, V369, P2106, DOI 10.1016/S0140-6736(07)60983-0
   Miele E, 2017, ONCOTARGET, V8, P68557, DOI 10.18632/oncotarget.19782
   Milite C, 2019, J MED CHEM, V62, P2666, DOI 10.1021/acs.jmedchem.8b02008
   MILNER CM, 1993, BIOCHEM J, V290, P811, DOI 10.1042/bj2900811
   Mishra A, 2018, J PEDIATR NEUROSCI, V13, P366, DOI 10.4103/jpn.JPN-68-18
   Morera L, 2016, CLIN epigenetic, V8, DOI 10.1186/s13148-016-0223-4
   Nor C, 2013, MOL NEUROBIOL, V48, P533, DOI 10.1007/s12035-013-8441-7
   Northcott PA, 2019, NAT REV DIS PRIMERS, V5, DOI 10.1038/s41572-019-0063-6
   Northcott PA, 2017, NATURE, V547, P311, DOI 10.1038/nature22973
   Northcott PA, 2012, NAT REV NEUROL, V8, P340, DOI 10.1038/nrneurol.2012.78
   Perla A, 2020, FRONT CELL DEV BIOL, V8, DOI 10.3389/fcell.2020.00546
   Purcell DJ, 2011, J BIOL CHEM, V286, P41963, DOI 10.1074/jbc.M111.298463
   Rabal O, 2018, J MED CHEM, V61, P6518, DOI 10.1021/acs.jmedchem.7b01926
   Rahman Z, 2021, J BIOCHEM MOL TOXIC, V35, DOI 10.1002/jbt.22674
   Ramaswamy V, 2016, ACTA NEUROPATHOL, V131, P821, DOI 10.1007/s00401-016-1569-6
   Roesler R, 2010, EXPERT REV ANTICANC, V10, P1735, DOI 10.1586/ERA.10.167
   Rossi A, 2008, CLIN CANCER RES, V14, P971, DOI 10.1158/1078-0432.CCR-07-2072
   Schaefer A, 2009, NEURON, V64, P678, DOI 10.1016/j.neuron.2009.11.019
   Scheer S, 2017, FRONT IMMUNOL, V8, DOI 10.3389/fimmu.2017.00429
   Seier JA, 2021, J IMMUNOTHER CANCER, V9, DOI 10.1136/jitc-2020-001335
   Senyildiz M, 2017, TOXICOL IN VITRO, V44, P313, DOI 10.1016/j.tiv.2017.07.028
   Shah N R, 1995, Med Pediatr Oncol, V24, P257, DOI 10.1002/mpo.2950240408
   Shankar SR, 2013, epigenetic-US, V8, P16, DOI 10.4161/epi.23331
   Shinkai Y, 2011, GENE DEV, V25, P781, DOI 10.1101/gad.2027411
   Soumyanarayanan U, 2016, FUTURE MED CHEM, V8, P1635, DOI 10.4155/fmc-2016-0096
   Souza BK, 2018, MOL NEUROBIOL, V55, P7242, DOI 10.1007/s12035-018-0874-6
   Stupp R, 2005, NEW ENGL J MED, V352, P987, DOI 10.1056/NEJMoa043330
   Tachibana M, 2005, GENE DEV, V19, P815, DOI 10.1101/gad.1284005
   Tachibana M, 2008, EMBO J, V27, P2681, DOI 10.1038/emboj.2008.192
   Tao H, 2014, MOL CELL BIOCHEM, V394, P23, DOI 10.1007/s11010-014-2077-4
   Taylor MD, 2012, ACTA NEUROPATHOL, V123, P465, DOI 10.1007/s00401-011-0922-z
   Thomaz A, 2020, CANCERS, V12, DOI 10.3390/cancers12092542
   Venneti S, 2013, J NEUROPATH EXP NEUR, V72, P298, DOI 10.1097/NEN.0b013e3182898113
   von Bueren AO, 2016, J CLIN ONCOL, V34, P4151, DOI 10.1200/JCO.2016.67.2428
   Wen PY, 2008, NEW ENGL J MED, V359, P492, DOI 10.1056/NEJMra0708126
   WIEGEL B, 1991, AM J NEURORADIOL, V12, P1198
   Wozniak RJ, 2007, ONCOGENE, V26, P77, DOI 10.1038/sj.onc.1209763
   Wu G, 2014, NAT GENET, V46, P444, DOI 10.1038/ng.2938
   Yi X, 2015, AM J TRANSL RES, V7, P2159
   Zang LL, 2017, ONCOTARGET, V8, P63187, DOI 10.18632/oncotarget.18730
   Zhong XW, 2015, HISTOPATHOLOGY, V66, P192, DOI 10.1111/his.12456
   Zwergel C, 2018, FRONT PEDIATR, V6, DOI 10.3389/fped.2018.00370
NR 94
TC 1
Z9 1
U1 4
U2 4
PU MDPI
PI BASEL
PA ST ALBAN-ANLAGE 66, CH-4052 BASEL, SWITZERLAND
EI 1422-0067
J9 INT J MOL SCI
JI Int. J. Mol. Sci.
PD OCT
PY 2021
VL 22
IS 20
AR 11292
DI 10.3390/ijms222011292
PG 11
WC Biochemistry & Molecular Biology; Chemistry, Multidisciplinary
WE Science Citation Index Expanded (SCI-EXPANDED)
SC Biochemistry & Molecular Biology; Chemistry
GA WS8OC
UT WOS:000715435600001
PM 34681949
OA gold, Green Published
DA 2022-04-10
ER

PT J
AU Abelin, JG
   Patel, J
   Lu, XD
   Feeney, CM
   Fagbami, L
   Creech, AL
   Hu, R
   Lam, D
   Davison, D
   Pino, L
   Qiao, JW
   Kuhn, E
   Officer, A
   Li, JX
   Abbatiello, S
   Subramanian, A
   Sidman, R
   Snyder, E
   Carr, SA
   Jaffe, JD
AF Abelin, Jennifer G.
   Patel, Jinal
   Lu, Xiaodong
   Feeney, Caitlin M.
   Fagbami, Lola
   Creech, Amanda L.
   Hu, Roger
   Lam, Daniel
   Davison, Desiree
   Pino, Lindsay
   Qiao, Jana W.
   Kuhn, Eric
   Officer, Adam
   Li, Jianxue
   Abbatiello, Susan
   Subramanian, Aravind
   Sidman, Richard
   Snyder, Evan
   Carr, Steven A.
   Jaffe, Jacob D.
TI Reduced-representation Phosphosignatures Measured by Quantitative
   Targeted MS Capture Cellular States and Enable Large-scale Comparison of
   Drug-induced Phenotypes
SO MOLECULAR & CELLULAR PROTEOMICS
LA English
DT Article
ID CONNECTIVITY MAP; gene expression; RECEPTOR FAMILY; PROTEIN;
   PHOSPHORYLATION; CANCER; GROWTH; REVEALS; ASSAY; AMPK
AB Profiling post-translational modification represents an alternative dimension to gene expression data in characterizing cellular processes. Many cellular responses to drugs are mediated by changes in cellular phosphosignaling. We sought to develop a common platform on which phosphosignaling responses could be profiled across thousands of samples, and created a targeted MS assay that profiles a reduced-representation set of phosphopeptide that we show to be strong indicators of responses to chemical perturbagens.
   To develop the assay, we investigated the coordinate regulation of phosphosites in samples derived from three cell lines treated with 26 different bioactive small molecules. Phosphopeptide analytes were selected from these discovery studies by clustering and picking 1 to 2 proxy members from each cluster. A quantitative, targeted parallel reaction monitoring assay was developed to directly measure 96 reduced-representation probes. Sample processing for proteolytic digestion, protein quantification, peptide desalting, and phosphopeptide enrichment have been fully automated, making possible the simultaneous processing of 96 samples in only 3 days, with a plate phosphopeptide enrichment variance of 12%. This highly reproducible process allowed similar to 95% of the reduced-representation phosphopeptide probes to be detected in similar to 200 samples.
   The performance of the assay was evaluated by measuring the probes in new samples generated under treatment conditions from discovery experiments, recapitulating the observations of deeper experiments using a fraction of the analytical effort. We measured these probes in new experiments varying the treatments, cell types, and time-points to demonstrate generalizability. We demonstrated that the assay is sensitive to disruptions in common signaling pathway (e.g. MAPK, PI3K/mTOR, and CDK). The high-throughput, reduced-representation phosphoproteomics assay provides a platform for the comparison of perturbations across a range of biological conditions, suitable for profiling thousands of samples. We believe the assay will prove highly useful for classification of known and novel drug and genetic mechanism through comparison of phosphoproteomic signatures.
C1 [Abelin, Jennifer G.; Patel, Jinal; Lu, Xiaodong; Feeney, Caitlin M.; Fagbami, Lola; Creech, Amanda L.; Hu, Roger; Lam, Daniel; Davison, Desiree; Pino, Lindsay; Qiao, Jana W.; Kuhn, Eric; Officer, Adam; Abbatiello, Susan; Subramanian, Aravind; Carr, Steven A.; Jaffe, Jacob D.] Broad Inst MIT & Harvard, 415 Main St, Cambridge, MA 02142 USA.
   [Li, Jianxue; Sidman, Richard] Beth Israel Deaconess Med Ctr, Boston, MA 02215 USA.
   [Snyder, Evan] Sanford Burhnam Res Inst, La Jolla, CA 92037 USA.
RP Jaffe, JD (corresponding author), Broad Inst, Dept Prote, 7 Cambridge Ctr Room 5025, Cambridge, MA 02142 USA.
EM jjaffe@broadinstitute.org
RI Carr, Steven A./AAH-8366-2019
OI Fagbami, Lola/0000-0003-3127-4373; Abelin, Jennifer/0000-0001-5262-7241;
   Pino, Lindsay/0000-0003-1857-7222
FU NIHUnited States Department of Health & Human ServicesNational
   Institutes of Health (NIH) - USA [U01CA164186, U54HG008097]; NCI
   Clinical Proteomics Tumor Analysis Consortium initiative grant
   [U24CA160034]; Agilent Technologies Foundation; Agilent Technologies,
   Inc.; NATIONAL CANCER INSTITUTEUnited States Department of Health &
   Human ServicesNational Institutes of Health (NIH) - USANIH National
   Cancer Institute (NCI) [U01CA164186, U24CA160034] Funding Source: NIH
   RePORTER; NATIONAL HUMAN GENOME RESEARCH INSTITUTEUnited States
   Department of Health & Human ServicesNational Institutes of Health (NIH)
   - USANIH National Human Genome Research Institute (NHGRI) [U54HG008097]
   Funding Source: NIH RePORTER
FX This work was supported in part through NIH Grants U01CA164186 and
   U54HG008097 to J.D.J and by a Thought Leader Award and gift to S.A.C.
   from the Agilent Technologies Foundation and Agilent Technologies, Inc.
   E.K and S.A.C also acknowledge financial support from NCI Clinical
   Proteomics Tumor Analysis Consortium initiative grant U24CA160034 to
   S.A.C. The content is solely the responsibility of the authors and does
   not necessarily represent the official views of the National Institutes
   of Health.
CR Alcolea MP, 2012, MOL CELL PROTEOMICS, V11, P453, DOI 10.1074/mcp.M112.017483
   Amanchy R, 2007, NAT BIOTECHNOL, V25, P285, DOI 10.1038/nbt0307-285
   Amit I, 2007, MOL SYST BIOL, V3, DOI 10.1038/msb4100195
   Barbie DA, 2009, NATURE, V462, P108, DOI 10.1038/nature08460
   Barrett T, 2013, NUCLEIC ACIDS RES, V41, pD991, DOI 10.1093/nar/gks1193
   Bodenmiller B, 2007, NAT METHODS, V4, P231, DOI 10.1038/nmeth1005
   Bublil EM, 2007, CURR OPIN CELL BIOL, V19, P124, DOI 10.1016/j.ceb.2007.02.008
   Choudhary A, 2014, PLOS ONE, V9, DOI 10.1371/journal.pone.0095194
   Creech AL, 2015, METHODS, V72, P57, DOI 10.1016/j.ymeth.2014.10.033
   Duan QN, 2014, NUCLEIC ACIDS RES, V42, pW449, DOI 10.1093/nar/gku476
   Edgar R, 2002, NUCLEIC ACIDS RES, V30, P207, DOI 10.1093/nar/30.1.207
   Ficarro SB, 2009, ANAL CHEM, V81, P4566, DOI 10.1021/ac9004452
   Firestein R, 2008, NATURE, V455, P547, DOI 10.1038/nature07179
   Foster FM, 2003, J CELL SCI, V116, P3037, DOI 10.1242/jcs.00609
   Franceschini A, 2013, NUCLEIC ACIDS RES, V41, pD808, DOI 10.1093/nar/gks1094
   Freeman M, 2000, NATURE, V408, P313, DOI 10.1038/35042500
   Gheorghiade M, 2004, CIRCULATION, V109, P2959, DOI 10.1161/01.CIR.0000132482.95686.87
   Harvard Stem Cell Institute, 2008, STEMBOOK
   Holliday DL, 2011, BREAST CANCER RES, V13, DOI 10.1186/bcr2889
   Hornbeck PV, 2004, PROTEOMICS, V4, P1551, DOI 10.1002/pmic.200300772
   Jaffe JD, 2008, MOL CELL PROTEOMICS, V7, P1952, DOI 10.1074/mcp.M800218-MCP200
   Jaffe JD, 2013, NAT GENET, V45, P1386, DOI 10.1038/ng.2777
   Jedrychowski MP, 2011, MOL CELL PROTEOMICS, V10, DOI 10.1074/mcp.M111.009910
   Jimeno A, 2010, MOL CANCER THER, V9, P311, DOI 10.1158/1535-7163.MCT-09-0693
   Kanehisa M, 2000, NUCLEIC ACIDS RES, V28, P27, DOI 10.1093/nar/28.1.27
   Kanehisa M, 2014, NUCLEIC ACIDS RES, V42, pD199, DOI 10.1093/nar/gkt1076
   Kim EK, 2010, BBA-MOL BASIS DIS, V1802, P396, DOI 10.1016/j.bbadis.2009.12.009
   Krumm N, 2014, TRENDS NEUROSCI, V37, P95, DOI 10.1016/j.tins.2013.11.005
   LALLI E, 1994, J BIOL CHEM, V269, P17359
   Lamb J, 2007, NAT REV CANCER, V7, P54, DOI 10.1038/nrc2044
   Lamb J, 2006, SCIENCE, V313, P1929, DOI 10.1126/science.1132939
   Lawrence MC, 2008, CELL RES, V18, P436, DOI 10.1038/cr.2008.37
   Lind SB, 2008, J PROTEOME RES, V7, P2897, DOI 10.1021/pr8000546
   Liu HB, 2004, ANAL CHEM, V76, P4193, DOI 10.1021/ac0498563
   Macek B, 2009, ANNU REV PHARMACOL, V49, P199, DOI 10.1146/annurev.pharmtox.011008.145606
   MacLean B, 2010, BIOINFORMATICS, V26, P966, DOI 10.1093/bioinformatics/btq054
   Manning G, 2002, SCIENCE, V298, P1912, DOI 10.1126/science.1075762
   Mertins P, 2014, MOL CELL PROTEOMICS, V13, P1690, DOI 10.1074/mcp.M113.036392
   Mertins P, 2013, NAT METHODS, V10, P634, DOI 10.1038/nmeth.2518
   Mihaylova MM, 2011, NAT CELL BIOL, V13, P1016, DOI 10.1038/ncb2329
   Nishi H, 2011, STRUCTURE, V19, P1807, DOI 10.1016/j.str.2011.09.021
   Olsen JV, 2010, SCI SIGNAL, V3, DOI 10.1126/scisignal.2000475
   Ozer RS, 2000, MOL BIOL CELL, V11, P3573, DOI 10.1091/mbc.11.10.3573
   Rappsilber J, 2007, NAT PROTOC, V2, P1896, DOI 10.1038/nprot.2007.261
   Rudomin EL, 2009, J PROTEOME RES, V8, P3154, DOI 10.1021/pr801017a
   Salminen A, 2012, AGEING RES REV, V11, P230, DOI 10.1016/j.arr.2011.12.005
   Scholl C, 2009, CELL, V137, P821, DOI 10.1016/j.cell.2009.03.017
   Shannon P, 2003, GENOME RES, V13, P2498, DOI 10.1101/gr.1239303
   Sharma SV, 2007, NAT REV CANCER, V7, P169, DOI 10.1038/nrc2088
   Soste M, 2014, NAT METHODS, V11, P1045, DOI [10.1038/NMETH.3101, 10.1038/nmeth.3101]
   Steinberg GR, 2009, PHYSIOL REV, V89, P1025, DOI 10.1152/physrev.00011.2008
   SUTER B, 1991, CELL, V67, P917, DOI 10.1016/0092-8674(91)90365-6
   Tang H, 2014, ANAL CHEM, V86, P5526, DOI 10.1021/ac500972x
   Tinti M, 2012, NEW BIOTECHNOL, V29, P571, DOI 10.1016/j.nbt.2011.12.001
   Ubersax JA, 2007, NAT REV MOL CELL BIO, V8, P530, DOI 10.1038/nrm2203
   Villen J, 2008, NAT PROTOC, V3, P1630, DOI 10.1038/nprot.2008.150
   Wieduwilt MJ, 2008, CELL MOL LIFE SCI, V65, P1566, DOI 10.1007/s00018-008-7440-8
   Wu GJ, 2005, BREAST CANCER RES, V7, pR609, DOI 10.1186/bcr1262
   Zoncu R, 2011, NAT REV MOL CELL BIO, V12, P21, DOI 10.1038/nrm3025
NR 59
TC 51
Z9 53
U1 2
U2 6
PU AMER SOC BIOCHEMISTRY MOLECULAR BIOLOGY INC
PI ROCKVILLE
PA 11200 ROCKVILLE PIKE, SUITE 302, ROCKVILLE, MD, UNITED STATES
SN 1535-9476
EI 1535-9484
J9 MOL CELL PROTEOMICS
JI Mol. Cell. Proteomics
PD MAY
PY 2016
VL 15
IS 5
BP 1622
EP 1641
DI 10.1074/mcp.M116.058354
PG 20
WC Biochemical Research Methods
WE Science Citation Index Expanded (SCI-EXPANDED)
SC Biochemistry & Molecular Biology
GA DL5OI
UT WOS:000375686100011
PM 26912667
OA hybrid, Green Published
DA 2022-04-10
ER

PT J
AU Trulson, A
   Bystrom, J
   Engstrom, A
   Larsson, R
   Venge, P
AF Trulson, A.
   Bystrom, J.
   Engstrom, A.
   Larsson, R.
   Venge, P.
TI The functional heterogeneity of eosinophil cationic protein is
   determined by a gene polymorphism and post-translational modification
SO CLINICAL AND EXPERIMENTAL ALLERGY
LA English
DT Article
DE cytotoxic activity; cytotoxic protein; eosinophil; gene polymorphism;
   granule protein; purification; signal peptide cleavage
ID MAJOR BASIC-PROTEIN; RIBONUCLEASE-ACTIVITY; SCHISTOSOMA-MANSONI;
   IN-VITRO; LOCALIZATION; NEUROTOXIN; CELLS; ECP; PURIFICATION; ACTIVATION
AB Background The eosinophil is a cytotoxic cell and takes part in parasite killing and tissue-destructive processes by secretion of proteins such as eosinophil cationic protein (ECP). A polymorphism was demonstrated in the ECP gene, giving rise to a substitution of arginine at position 97 with threonine. This polymorphism is related to disease development.
   Objective To investigate the functional and molecular heterogeneity of native ECP and the functional consequences of the replacement of arginine with a threonine.
   Methods ECP was purified from healthy blood donors by gel filtration, ion-exchange chromatography and reversed-phase chromatography. Recombinant ECPs i.e. rECP 97(arg) and rECP 97(thr) were produced by the pFASTBAC baculovirus expression system. The cytotoxic activity was determined against an erythroleukaemia or a small cell lung cancer cell line.
   Results Native ECP was purified to apparent homogeneity and showed a considerable molecular heterogeneity and a corresponding functional heterogeneity with respect to cytotoxic activity. After reduction, the native cytotoxic ECP showed three bands on sodium dodecylsulphate polyacrylamide gel electrophoresis : one major band at 18-20 kDa and two minor bands at about 10 and 5 kDa, respectively. The 5 kDa contained two masses differing with 56.2 Da, which corresponds to the difference in molecular masses of arginine and threonine. rECP 97(arg) was cytotoxic in contrast to rECP97(thr). Deglycosylation with N-glycosidase F did not affect the cytotoxic activity of native ECP to any measurable extent nor the activity of rECP 97(arg), whereas rECP 97(thr) achieved cytotoxic activity. The RNase activities of the recombinant and native ECPs were similar.
   Conclusion We conclude that ECP is present in several molecular forms with varying biological activities. Some of this functional heterogeneity is based on the genetic polymorphism of the ECP gene and some on post-translational modification. In subjects carrying the ECP 97(thr) variant, the cytotoxic activity may be disguised by N-linked glycosylation of the active site.
C1 Univ Uppsala Hosp, Dept Med Sci, S-75185 Uppsala, Sweden.
   UCL, Div Med, Ctr Clin Pharmacol, London, England.
   Uppsala Univ, Dept Med Biochem & Microbiol, Uppsala, Sweden.
   Uppsala Univ, Dept Med Sci, Uppsala, Sweden.
RP Trulson, A (corresponding author), Univ Uppsala Hosp, Dept Med Sci, S-75185 Uppsala, Sweden.
EM Agneta.Trulson@medsci.uu.se
CR AHMED SA, 1994, J IMMUNOL METHODS, V170, P211, DOI 10.1016/0022-1759(94)90396-4
   Amin K, 2000, AM J RESP CRIT CARE, V162, P2295, DOI 10.1164/ajrccm.162.6.9912001
   Bendtsen JD, 2004, J MOL BIOL, V340, P783, DOI 10.1016/j.jmb.2004.05.028
   BORREGAARD N, 1983, J CELL BIOL, V97, P52, DOI 10.1083/jcb.97.1.52
   BYSTROM J, 2002, THESIS UPPSALSA U UP
   CAPRON M, 1986, Parasitology Today, V2, P69, DOI 10.1016/0169-4758(86)90158-4
   Carreras E, 2003, BIOCHEMISTRY-US, V42, P6636, DOI 10.1021/bi0273011
   Domachowske JB, 1998, NUCLEIC ACIDS RES, V26, P3358, DOI 10.1093/nar/26.14.3358
   EGESTEN A, 1986, J HISTOCHEM CYTOCHEM, V34, P1399, DOI 10.1177/34.11.3772075
   FREDENS K, 1982, J ALLERGY CLIN IMMUN, V70, P361, DOI 10.1016/0091-6749(82)90025-2
   GLEICH GJ, 1986, P NATL ACAD SCI USA, V83, P3146, DOI 10.1073/pnas.83.10.3146
   GULLBERG U, 1986, BIOCHEM BIOPH RES CO, V139, P1239, DOI 10.1016/S0006-291X(86)80310-2
   HAMANN KJ, 1990, J IMMUNOL, V144, P3166
   HAMANN KJ, 1990, GENOMICS, V7, P535, DOI 10.1016/0888-7543(90)90197-3
   Jonsson UB, 2002, CLIN EXP ALLERGY, V32, P1092, DOI 10.1046/j.1365-2222.2002.01410.x
   KLEMPNER MS, 1980, J CELL BIOL, V86, P21, DOI 10.1083/jcb.86.1.21
   LARSSON R, 1992, INT J CANCER, V50, P177, DOI 10.1002/ijc.2910500204
   LEHRER RI, 1989, J IMMUNOL, V142, P4428
   Maeda T, 2002, EUR J BIOCHEM, V269, P307, DOI 10.1046/j.0014-2956.2001.02653.x
   MCLAREN DJ, 1981, PARASITE IMMUNOL, V3, P359, DOI 10.1111/j.1365-3024.1981.tb00414.x
   MCLAREN DJ, 1984, PARASITOLOGY, V88, P491, DOI 10.1017/S0031182000054755
   OLSSON I, 1986, BLOOD, V67, P498
   OLSSON I, 1974, BLOOD, V44, P235, DOI 10.1182/blood.V44.2.235.235
   PETERS MS, 1986, LAB INVEST, V54, P656
   PETERSON CGB, 1988, EUR J HAEMATOL, V40, P415
   PETERSON CGB, 1991, CLIN EXP ALLERGY, V21, P561, DOI 10.1111/j.1365-2222.1991.tb00847.x
   ROBERTS RL, 1991, J ALLERGY CLIN IMMUN, V87, P1105, DOI 10.1016/0091-6749(91)92156-U
   ROSENBERG HF, 1995, J BIOL CHEM, V270, P30234
   ROSENBERG HF, 1989, J EXP MED, V170, P163, DOI 10.1084/jem.170.1.163
   SLIFMAN NR, 1986, J IMMUNOL, V137, P2913
   TRULSON A, 1996, THESIS UPPSALA U UPP
   Venge P, 1999, CLIN EXP ALLERGY, V29, P1172
   YOUNG JD, 1986, NATURE, V321, P613, DOI 10.1038/321613a0
   Zhang J, 2000, GENETICS, V156, P1949
NR 34
TC 48
Z9 50
U1 0
U2 0
PU WILEY-BLACKWELL
PI MALDEN
PA COMMERCE PLACE, 350 MAIN ST, MALDEN 02148, MA USA
SN 0954-7894
J9 CLIN EXP ALLERGY
JI Clin. Exp. Allergy
PD FEB
PY 2007
VL 37
IS 2
BP 208
EP 218
DI 10.1111/j.1365-2222.2007.02644.x
PG 11
WC Allergy; Immunology
WE Science Citation Index Expanded (SCI-EXPANDED)
SC Allergy; Immunology
GA 128RS
UT WOS:000243676700007
PM 17250693
DA 2022-04-10
ER

PT J
AU Ghazi, T
   Nagiah, S
   Naidoo, P
   Chuturgoon, AA
AF Ghazi, Terisha
   Nagiah, Savania
   Naidoo, Pragalathan
   Chuturgoon, Anil A.
TI Fusaric acid-induced promoter methylation of DNA methyltransferases
   triggers DNA hypomethylation in human hepatocellular carcinoma (HepG2)
   cells
SO epigenetic
LA English
DT Article
DE Fusaric acid; global DNA hypomethylation; promoter methylation; DNA
   methyltransferases; miR-29b; DNMT ubiquitination; MBD2
ID FUMONISIN B-1; CHROMOSOMAL INSTABILITY; HYPOTENSIVE AGENT; RAT-KIDNEY;
   MECHANISM; PROTEIN; CANCER; DIFFERENTIATION; DEMETHYLATION; ACTIVATION
AB Fusaric acid (FA), a mycotoxin contaminant of maize, displays toxicity in plants and animals; however, its epigenetic mechanism is unknown. DNA methylation, an epigenetic modification that regulates gene expression, is mediated by DNA methyltransferases (DNMTs; DNMT1, DNMT3A, and DNMT3B) and demethylases (MBD2). The expression of DNMTs and demethylases are regulated by promoter methylation, microRNAs (miR-29b) and post-translational modification (ubiquitination). Alterations in these DNA methylation modifying enzymes affect DNA methylation patterns and offer novel mechanism of FA toxicity. We determined the effect of FA on global DNA methylation as well as a mechanism of FA-induced changes in DNA methylation by transcriptional (promoter methylation), post-transcriptional (miR-29b) and post-translational (ubiquitination) regulation of DNMTs and MBD2 in the human hepatocellular carcinoma (HepG2) cell line. FA induced global DNA hypomethylation (p < 0.0001) in HepG2 cells. FA decreased the mRNA and protein expression of DNMT1 (p < 0.0001), DNMT3A (p < 0.0001), and DNMT3B (p < 0.0001) by upregulating miR-29b (p < 0.0001) and inducing promoter hypermethylation of DNMT1 (p < 0.0001) and DNMT3B (p < 0.0001). FA decreased the ubiquitination of DNMT1 (p = 0.0753), DNMT3A (p = 0.0008), and DNMT3B (p < 0.0001) by decreasing UHRF1 (p < 0.0001) and USP7 (p < 0.0001). FA also induced MBD2 promoter hypomethylation (p < 0.0001) and increased MBD2 expression (p < 0.0001). Together these results indicate that FA induces global DNA hypomethylation by altering DNMT promoter methylation, upregulating miR-29b, and increasing MBD2 in HepG2 cells.
C1 [Ghazi, Terisha; Nagiah, Savania; Naidoo, Pragalathan; Chuturgoon, Anil A.] Univ KwaZulu Natal, Coll Hlth Sci, Sch Lab Med & Med Sci, Discipline Med Biochem & Chem Pathol, Howard Coll Campus, ZA-4041 Durban, South Africa.
RP Chuturgoon, AA (corresponding author), Univ KwaZulu Natal, Coll Hlth Sci, Sch Lab Med & Med Sci, Discipline Med Biochem & Chem Pathol, Howard Coll Campus, ZA-4041 Durban, South Africa.
EM CHUTUR@ukzn.ac.za
RI Ghazi, Terisha/AAU-5164-2021; Nagiah, Savania/AAC-4388-2020; Chuturgoon,
   Anil/AAE-5068-2021
OI Naidoo, Pragalathan/0000-0002-8905-5926; Ghazi,
   Terisha/0000-0002-0179-213X
FU National Research Foundation Innovation Doctoral Scholarship
   [SFH160703175722]; College of Health Sciences (University of Kwa-Zulu
   Natal) [570869]
FX This work was supported by the National Research Foundation Innovation
   Doctoral Scholarship (Grant no.: SFH160703175722) and the College of
   Health Sciences (University of Kwa-Zulu Natal; Grant no.: 570869).
CR Abdul NS, 2016, TOXICON, V119, P336, DOI 10.1016/j.toxicon.2016.07.002
   Ahn EY, 2013, MOL CANCER RES, V11, P748, DOI 10.1158/1541-7786.MCR-12-0665
   Bacon CW, 1996, APPL ENVIRON MICROB, V62, P4039, DOI 10.1128/AEM.62.11.4039-4043.1996
   BACON CW, 1995, MYCOPATHOLOGIA, V129, P29, DOI 10.1007/BF01139334
   Bostick M, 2007, SCIENCE, V317, P1760, DOI 10.1126/science.1147939
   Chen ZH, 2017, INDIAN J MICROBIOL, V57, P68, DOI 10.1007/s12088-016-0617-1
   Cheng JD, 2015, NAT COMMUN, V6, DOI 10.1038/ncomms8023
   Chuturgoon A, 2014, TOXICOLOGY, V315, P65, DOI 10.1016/j.tox.2013.11.004
   Chuturgoon AA, 2014, TOXICOL LETT, V227, P50, DOI 10.1016/j.toxlet.2014.02.026
   DALTON A, 1984, PLANT PHYSIOL, V74, P39, DOI 10.1104/pp.74.1.39
   Demirel G, 2015, PHARM BIOL, V53, P1302, DOI 10.3109/13880209.2014.976714
   Denis H, 2011, EMBO REP, V12, P647, DOI 10.1038/embor.2011.110
   Detich N, 2002, J BIOL CHEM, V277, P35791, DOI 10.1074/jbc.C200408200
   Devaraja S, 2013, BLOOD COAGUL FIBRIN, V24, P419, DOI 10.1097/MBC.0b013e32835d548c
   Dhani S, 2017, SCI REP-UK, V7, DOI 10.1038/s41598-017-03183-0
   Diniz SPSS, 2009, PHYTON-INT J EXP BOT, V78, P155
   DIRINGER MN, 1982, PHARMACOL BIOCHEM BE, V16, P73, DOI 10.1016/0091-3057(82)90016-8
   Dodge JE, 2005, J BIOL CHEM, V280, P17986, DOI 10.1074/jbc.M413246200
   Du ZW, 2010, SCI SIGNAL, V3, DOI 10.1126/scisignal.2001462
   Fabbri M, 2007, P NATL ACAD SCI USA, V104, P15805, DOI 10.1073/pnas.0707628104
   Fairchild A. S., 2005, International Journal of Poultry Science, V4, P350
   Fazio C, 2018, FRONT PHARMACOL, V9, DOI 10.3389/fphar.2018.01443
   FERNANDEZPOL JA, 1993, ANTICANCER RES, V13, P57
   Garzon R, 2009, BLOOD, V113, P6411, DOI 10.1182/blood-2008-07-170589
   Ghazi T, 2017, J CELL BIOCHEM, V118, P3866, DOI 10.1002/jcb.26037
   Gopalakrishnan S, 2008, MUTAT RES-FUND MOL M, V647, P30, DOI 10.1016/j.mrfmmm.2008.08.006
   HIDAKA H, 1969, J ANTIBIOT, V22, P228, DOI 10.7164/antibiotics.22.228
   Iraola-Guzman S, 2011, CLIN GENET, V80, P1, DOI 10.1111/j.1399-0004.2011.01673.x
   Jackson M, 2004, MOL CELL BIOL, V24, P8862, DOI 10.1128/MCB.24.20.8862-8871.2004
   Jackson-Grusby L, 2001, NAT GENET, V27, P31, DOI 10.1038/83730
   Jia YH, 2016, CELL DISCOV, V2, DOI 10.1038/celldisc.2016.7
   KOHLER K, 1983, Z PFLANZENPHYSIOL, V109, P355
   Lan M, 2018, J PINEAL RES, V65, DOI 10.1111/jpi.12477
   Li X, 2017, BIOMED PHARMACOTHER, V93, P130, DOI 10.1016/j.biopha.2017.06.002
   Lin RK, 2014, CELL BIOSCI, V4, DOI 10.1186/2045-3701-4-46
   Livak KJ, 2001, METHODS, V25, P402, DOI 10.1006/meth.2001.1262
   Mamur S, 2020, DRUG CHEM TOXICOL, V43, P149, DOI 10.1080/01480545.2018.1499772
   Naghitorabi M, 2013, RES PHARM SCI, V8, P167
   Novakovic B, 2010, J BIOL CHEM, V285, P9583, DOI 10.1074/jbc.M109.064956
   Ogata S, 2001, BIOSCI BIOTECH BIOCH, V65, P2337, DOI 10.1271/bbb.65.2337
   Park SY, 2009, NAT STRUCT MOL BIOL, V16, P23, DOI 10.1038/nsmb.1533
   Pavlovkin J, 2004, PLANT SOIL ENVIRON, V50, P397, DOI 10.17221/4050-PSE
   Peng LR, 2011, MOL CELL BIOL, V31, P4720, DOI 10.1128/MCB.06147-11
   Qin HH, 2013, J DERMATOL SCI, V69, P61, DOI 10.1016/j.jdermsci.2012.10.011
   Reddy RV, 1996, B ENVIRON CONTAM TOX, V57, P354, DOI 10.1007/s001289900198
   Rodriguez J, 2006, CANCER RES, V66, P8462, DOI 10.1158/0008-5472.CAN-06-0293
   Sancak D, 2015, TOXICOL IN VITRO, V29, P1809, DOI 10.1016/j.tiv.2015.07.019
   Sapko OA, 2011, RUSS J PLANT PHYSL+, V58, P828, DOI 10.1134/S1021443711050190
   Scott A, 2014, ACTA BIOCH BIOPH SIN, V46, P199, DOI 10.1093/abbs/gmt146
   Singh VK, 2017, PLANT PHYSIOL BIOCH, V118, P320, DOI 10.1016/j.plaphy.2017.06.028
   Singh VK, 2014, BOT STUD, V55, DOI 10.1186/s40529-014-0066-2
   SMITH TK, 1991, J ANIM SCI, V69, P2044, DOI 10.2527/1991.6952044x
   So MY, 2014, PLOS ONE, V9, DOI 10.1371/journal.pone.0096404
   Stack BC, 2004, OTOLARYNG HEAD NECK, V131, P54, DOI 10.1016/j.otohns.2004.02.038
   Stirzaker C, 2017, ONCOGENE, V36, P1328, DOI 10.1038/onc.2016.297
   Streit E, 2013, TOXINS, V5, P504, DOI 10.3390/toxins5030504
   Teng Y, 2015, ONCOTARGET, V6, P40799, DOI 10.18632/oncotarget.5695
   TERASAWA F, 1971, JPN CIRCULATION J, V35, P339, DOI 10.1253/jcj.35.339
   Wang J, 2015, 2015 IEEE INTERNATIONAL CONFERENCE ON MECHATRONICS AND AUTOMATION, P6, DOI 10.1109/ICMA.2015.7237447
   Wei W, 2013, CELL DEATH DIS, V4, DOI 10.1038/cddis.2013.184
   Winter J, 2009, NAT CELL BIOL, V11, P228, DOI 10.1038/ncb0309-228
   Yin ES, 2015, BIOMETALS, V28, P783, DOI 10.1007/s10534-015-9855-7
   Yuan KF, 2013, GASTROENTEROLOGY, V145, P853, DOI 10.1053/j.gastro.2013.06.008
   Zhu CC, 2016, ARCH TOXICOL, V90, P1495, DOI 10.1007/s00204-015-1560-3
NR 64
TC 3
Z9 3
U1 2
U2 8
PU TAYLOR & FRANCIS INC
PI PHILADELPHIA
PA 530 WALNUT STREET, STE 850, PHILADELPHIA, PA 19106 USA
SN 1559-2294
EI 1559-2308
J9 epigenetic-US
JI epigenetic
PD AUG 3
PY 2019
VL 14
IS 8
BP 804
EP 817
DI 10.1080/15592294.2019.1615358
EA MAY 2019
PG 14
WC Biochemistry & Molecular Biology; Genetics & Heredity
WE Science Citation Index Expanded (SCI-EXPANDED)
SC Biochemistry & Molecular Biology; Genetics & Heredity
GA IJ1KB
UT WOS:000471428100001
PM 31060424
OA Bronze, Green Published
DA 2022-04-10
ER

PT J
AU Syafruddin, SE
   Mohtar, MA
   Nazarie, WFWM
   Low, TY
AF Syafruddin, Saiful E.
   Mohtar, M. Aiman
   Wan Mohamad Nazarie, Wan Fahmi
   Low, Teck Yew
TI Two Sides of the Same Coin: The Roles of KLF6 in Physiology and
   Pathophysiology
SO BIOMOLECULES
LA English
DT Review
DE transcription factor; gene regulation; developmental process;
   inflammation; cancer; KLFs
ID TUMOR-SUPPRESSOR GENE; KRUPPEL-LIKE FACTOR-6; TRANSCRIPTION FACTOR KLF6;
   ZINC-FINGER PROTEIN; EPITHELIAL-MESENCHYMAL TRANSITION; PROMOTER-BINDING
   PROTEIN; HEPATIC STELLATE CELLS; prostate cancer; LUNG-CANCER;
   HEPATOCELLULAR-CARCINOMA
AB The Kruppel-like factors (KLFs) family of proteins control several key biological processes that include proliferation, differentiation, metabolism, apoptosis and inflammation. Dysregulation of KLF functions have been shown to disrupt cellular homeostasis and contribute to disease development. KLF6 is a relevant example; a range of functional and expression assays suggested that the dysregulation of KLF6 contributes to the onset of cancer, inflammation-associated diseases as well as cardiovascular diseases. KLF6 expression is either suppressed or elevated depending on the disease, and this is largely due to alternative splicing events producing KLF6 isoforms with specialised functions. Hence, the aim of this review is to discuss the known aspects of KLF6 biology that covers the gene and protein architecture, gene regulation, post-translational modification and functions of KLF6 in health and diseases. We put special emphasis on the equivocal roles of its full-length and spliced variants. We also deliberate on the therapeutic strategies of KLF6 and its associated signalling pathway. Finally, we provide compelling basic and clinical questions to enhance the knowledge and research on elucidating the roles of KLF6 in physiological and pathophysiological processes.
C1 [Syafruddin, Saiful E.; Mohtar, M. Aiman; Low, Teck Yew] Univ Kebangsaan Malaysia, UKM Med Mol Biol Inst UMBI, Kuala Lumpur 56000, Malaysia.
   [Wan Mohamad Nazarie, Wan Fahmi] Univ Malaysia Sabah, Fac Sci & Nat Resources, Biotechnol Programme, Kota Kinabalu 88400, Sabah, Malaysia.
RP Syafruddin, SE (corresponding author), Univ Kebangsaan Malaysia, UKM Med Mol Biol Inst UMBI, Kuala Lumpur 56000, Malaysia.
EM endisy@ppukm.ukm.edu.my; m.aimanmohtar@ppukm.ukm.edu.my;
   wanfahmi@ums.edu.my; lowteckyew@ppukm.ukm.edu.my
RI ; Mohtar, M. Aiman/B-8129-2018
OI Syafruddin, Saiful Effendi/0000-0002-9960-4888; Wan Mohamad Nazarie, Wan
   Fahmi/0000-0001-9569-3839; Low, Teck Yew/0000-0001-7878-7534; Mohtar, M.
   Aiman/0000-0002-9015-9802
FU Universiti Kebangsaan Malaysia, Geran Galakan Penyelidik Muda
   [GGPM-2020-035]
FX S.E.S. was supported by the Universiti Kebangsaan Malaysia, Geran
   Galakan Penyelidik Muda, GGPM-2020-035.
CR Agell L, 2008, MODERN PATHOL, V21, P1470, DOI 10.1038/modpathol.2008.145
   Ahronian LG, 2016, ONCOGENE, V35, P4653, DOI 10.1038/onc.2016.2
   Akimov V, 2018, NAT STRUCT MOL BIOL, V25, P631, DOI 10.1038/s41594-018-0084-y
   Andreoli V, 2010, IUBMB LIFE, V62, P896, DOI 10.1002/iub.396
   Anstee QM, 2019, NAT REV GASTRO HEPAT, V16, P411, DOI 10.1038/s41575-019-0145-7
   Anzalone AV, 2019, NATURE, V576, P149, DOI 10.1038/s41586-019-1711-4
   Ao H.-D., 2017, ONCOTARGET, V8, P87174
   Banck MS, 2006, FEBS LETT, V580, P6981, DOI 10.1016/j.febslet.2006.10.077
   Bar-Shira A, 2006, PROSTATE, V66, P1052, DOI 10.1002/pros.20425
   Bates DO, 2017, PHARMACOL REV, V69, P63, DOI 10.1124/pr.115.011239
   Bechmann LP, 2013, J HEPATOL, V58, P1000, DOI 10.1016/j.jhep.2013.01.020
   Bechmann LP, 2012, HEPATOLOGY, V55, P1083, DOI 10.1002/hep.24793
   Benzeno S, 2004, CANCER RES, V64, P3885, DOI 10.1158/0008-5472.CAN-03-2818
   Bi J, 2016, MOL THER-NUCL ACIDS, V5, DOI 10.1038/mtna.2016.71
   Botella LM, 2002, BLOOD, V100, P4001, DOI 10.1182/blood.V100.12.4001
   Boyault S, 2005, HEPATOLOGY, V41, P681, DOI 10.1002/hep.20588
   Britschgi A, 2008, ONCOGENE, V27, P5706, DOI 10.1038/onc.2008.179
   Camacho-Vanegas O, 2007, INT J CANCER, V121, P1390, DOI 10.1002/ijc.22809
   Cerami E, 2012, CANCER DISCOV, V2, P401, DOI 10.1158/2159-8290.CD-12-0095
   Chen H, 2011, GASTRIC CANCER, V14, P339, DOI 10.1007/s10120-011-0049-x
   Chen SG, 2019, EUR REV MED PHARMACO, V23, P8878, DOI 10.26355/eurrev_201910_19283
   Chen WF, 2016, NATURE, V539, P112, DOI 10.1038/nature19796
   Cho H, 2016, NATURE, V539, P107, DOI 10.1038/nature19795
   Cinelli MA, 2020, MED RES REV, V40, P158, DOI 10.1002/med.21599
   D'Astolfo DS, 2008, CELL DEATH DIFFER, V15, P613, DOI 10.1038/sj.cdd.4402299
   Date D, 2014, J BIOL CHEM, V289, P10318, DOI 10.1074/jbc.M113.526749
   De Graeve F, 2003, GENE, V314, P55, DOI 10.1016/S0378-1119(03)00720-0
   de Mendoza A, 2013, P NATL ACAD SCI USA, V110, pE4858, DOI 10.1073/pnas.1311818110
   DeKelver RC, 2013, PLOS GENET, V9, DOI 10.1371/journal.pgen.1003765
   Difeo A, 2008, CANCER RES, V68, P965, DOI 10.1158/0008-5472.CAN-07-2604
   Difeo A, 2006, CLIN CANCER RES, V12, P3730, DOI 10.1158/1078-0432.CCR-06-0054
   Difeo A, 2009, CANCER RES, V69, P4733, DOI 10.1158/0008-5472.CAN-08-4282
   Dionyssiou MG, 2013, SKELET MUSCLE, V3, DOI 10.1186/2044-5040-3-7
   Dumayne C, 2020, MOL METAB, V35, DOI 10.1016/j.molmet.2020.02.001
   Eming SA, 2014, SCI TRANSL MED, V6, DOI 10.1126/scitranslmed.3009337
   Sabatino ME, 2019, FRONT CELL DEV BIOL, V7, DOI 10.3389/fcell.2019.00297
   Fischer EA, 2001, J AM SOC NEPHROL, V12, P726, DOI 10.1681/ASN.V124726
   Gallardo-Vara E, 2016, ANGIOGENESIS, V19, P155, DOI 10.1007/s10456-016-9495-8
   Gao JJ, 2013, SCI SIGNAL, V6, DOI 10.1126/scisignal.2004088
   Gao Y, 2017, CANCER RES, V77, P330, DOI 10.1158/0008-5472.CAN-16-0348
   Garrido-Martin EM, 2013, CIRC RES, V112, P113, DOI 10.1161/CIRCRESAHA.112.275586
   Gasteiger G, 2017, J INNATE IMMUN, V9, P111, DOI 10.1159/000453397
   Gehrau RC, 2010, PLOS ONE, V5, DOI 10.1371/journal.pone.0008929
   Goodman WA, 2016, MUCOSAL IMMUNOL, V9, P1250, DOI 10.1038/mi.2016.1
   Hanahan D, 2011, CELL, V144, P646, DOI 10.1016/j.cell.2011.02.013
   Hanoun N, 2010, J HEPATOL, V53, P880, DOI 10.1016/j.jhep.2010.04.038
   Hatami R, 2013, SCI TRANSL MED, V5, DOI 10.1126/scitranslmed.3004688
   He AD, 2017, SCI REP-UK, V7, DOI 10.1038/s41598-017-02801-1
   He Y, 2019, FRONT PHARMACOL, V10, DOI 10.3389/fphar.2019.00361
   Holian J, 2008, AM J PHYSIOL-RENAL, V295, pF1388, DOI 10.1152/ajprenal.00055.2008
   Hornbeck PV, 2015, NUCLEIC ACIDS RES, V43, pD512, DOI 10.1093/nar/gku1267
   Horne SJ, 2018, DIABETES, V67, P2420, DOI 10.2337/db17-0958
   Hsu LS, 2017, INT J MED SCI, V14, P530, DOI 10.7150/ijms.19024
   Huang XW, 2008, J BIOL CHEM, V283, P29795, DOI 10.1074/jbc.M802515200
   Inuzuka H, 1999, BIOCHEM BIOPH RES CO, V265, P664, DOI 10.1006/bbrc.1999.1734
   Ito G, 2004, CANCER RES, V64, P3838, DOI 10.1158/0008-5472.CAN-04-0185
   Kaczynski J, 2003, GENOME BIOL, V4, DOI 10.1186/gb-2003-4-2-206
   Kim GD, 2020, FASEB J, V34, P3209, DOI 10.1096/fj.201902221R
   Kim GD, 2019, FASEB J, V33, P10902, DOI 10.1096/fj.201900867RR
   Kim GD, 2016, J BIOL CHEM, V291, P21271, DOI 10.1074/jbc.M116.738617
   Kim W, 2011, MOL CELL, V44, P325, DOI 10.1016/j.molcel.2011.08.025
   Kim Y, 1998, J BIOL CHEM, V273, P33750, DOI 10.1074/jbc.273.50.33750
   Kimmelman AC, 2004, ONCOGENE, V23, P5077, DOI 10.1038/sj.onc.1207662
   KLEVIT RE, 1991, SCIENCE, V253, P1367, DOI 10.1126/science.1896847
   Kohler B, 2004, INT J CANCER, V111, P644, DOI 10.1002/ijc.20302
   Koi C, 2017, ONCOTARGET, V8, P106429, DOI 10.18632/oncotarget.22472
   Koivisto PA, 2004, INT J CANCER, V111, P642, DOI 10.1002/ijc.20301
   Koizume S, 2015, MOL CANCER, V14, DOI 10.1186/s12943-015-0351-z
   Kojima S, 2000, BLOOD, V95, P1309
   Koritschoner NP, 1997, J BIOL CHEM, V272, P9573
   Kotas ME, 2015, CELL, V160, P816, DOI 10.1016/j.cell.2015.02.010
   Krafts KP, 2010, ORGANOGENESIS, V6, P225, DOI 10.4161/org.6.4.12555
   Kremer-Tal S, 2007, J HEPATOL, V46, P645, DOI 10.1016/j.jhep.2006.10.012
   Laitman BM, 2016, PLOS BIOL, V14, DOI 10.1371/journal.pbio.1002467
   Lalazar A, 1997, GENE, V195, P235, DOI 10.1016/S0378-1119(97)00159-5
   Lang UE, 2013, ONCOGENE, V32, P4557, DOI 10.1038/onc.2012.457
   Laub F, 2001, MECH DEVELOP, V106, P167, DOI 10.1016/S0925-4773(01)00419-1
   Lee SJ, 2006, MOL PHARMACOL, V70, P415, DOI 10.1124/mol.106.022954
   Leow CC, 2009, J BIOL CHEM, V284, P21057, DOI 10.1074/jbc.M109.001776
   Li D, 2005, J BIOL CHEM, V280, P26941, DOI 10.1074/jbc.M500463200
   Li D, 2005, CANCER RES, V65, P9216, DOI 10.1158/0008-5472.CAN-05-1040
   Li H, 2018, FRONT IMMUNOL, V9, DOI 10.3389/fimmu.2018.01175
   Lievre A, 2005, ONCOGENE, V24, P7253, DOI 10.1038/sj.onc.1208867
   Lin Y, 2020, FASEB J, V34, P12691, DOI 10.1096/fj.202000506R
   Ma LY, 2019, BIOCHEM BIOPH RES CO, V509, P845, DOI 10.1016/j.bbrc.2019.01.030
   Mallipattu SK, 2015, J CLIN INVEST, V125, P1347, DOI 10.1172/JCI77084
   Matsumoto N, 2006, BLOOD, V107, P1357, DOI 10.1182/blood-2005-05-1916
   McConnell BB, 2010, PHYSIOL REV, V90, P1337, DOI 10.1152/physrev.00058.2009
   Mertins P, 2013, NAT METHODS, V10, P634, DOI 10.1038/nmeth.2518
   Mgbemena V, 2013, CELL IMMUNOL, V283, P1, DOI 10.1016/j.cellimm.2013.06.002
   Mgbemena V, 2012, J IMMUNOL, V189, P606, DOI 10.4049/jimmunol.1102742
   Miele L, 2008, GASTROENTEROLOGY, V135, P282, DOI 10.1053/j.gastro.2008.04.004
   Montanini L, 2004, INT J CANCER, V111, P640, DOI 10.1002/ijc.20303
   Muhlbauer KR, 2003, BRIT J CANCER, V89, P687, DOI 10.1038/sj.bjc.6601164
   Munoz U, 2012, MOL CANCER RES, V10, P1216, DOI 10.1158/1541-7786.MCR-12-0213
   Nakamura H, 2004, INVEST OPHTH VIS SCI, V45, P4327, DOI 10.1167/iovs.04-0353
   Narla G, 2007, ONCOGENE, V26, P4428, DOI 10.1038/sj.onc.1210223
   Narla G, 2005, CANCER RES, V65, P5761, DOI 10.1158/0008-5472.CAN-05-0217
   Narla G, 2005, CANCER RES, V65, P1213, DOI 10.1158/0008-5472.CAN-04-4249
   Narla G, 2001, SCIENCE, V294, P2563, DOI 10.1126/science.1066326
   Narla G, 2008, J CLIN INVEST, V118, P2711, DOI 10.1172/JCI34780
   NUSSLEINVOLHARD C, 1980, NATURE, V287, P795, DOI 10.1038/287795a0
   Okano J, 2000, FEBS LETT, V473, P95, DOI 10.1016/S0014-5793(00)01468-X
   Pei JM, 2013, PLOS ONE, V8, DOI 10.1371/journal.pone.0081109
   Penn JW, 2012, INT J BURNS TRAUMA, V2, P18
   PERKINS AC, 1995, NATURE, V375, P318
   Qi W, 2007, NEPHROL DIAL TRANSPL, V22, P3147, DOI 10.1093/ndt/gfm365
   Qi WE, 2011, INT J BIOCHEM CELL B, V43, P383, DOI 10.1016/j.biocel.2010.11.008
   Racca AC, 2011, PLOS ONE, V6, DOI 10.1371/journal.pone.0022438
   Ratziu V, 1998, P NATL ACAD SCI USA, V95, P9500, DOI 10.1073/pnas.95.16.9500
   Rees HA, 2018, NAT REV GENET, V19, P770, DOI 10.1038/s41576-018-0059-1
   Reeves HL, 2004, GASTROENTEROLOGY, V126, P1090, DOI 10.1053/j.gastro.2004.01.005
   Rubinstein M, 2004, ENDOCRINOLOGY, V145, P3769, DOI 10.1210/en.2004-0173
   Rui LY, 2014, COMPR PHYSIOL, V4, P177, DOI 10.1002/cphy.c130024
   Sangodkar J, 2009, EUR J CANCER, V45, P666, DOI 10.1016/j.ejca.2008.11.009
   Sengupta S, 2017, TRENDS CANCER, V3, P269, DOI 10.1016/j.trecan.2017.03.006
   Seppala EH, 2007, EUR UROL, V52, P1076, DOI 10.1016/j.eururo.2006.11.019
   Sirach E, 2007, CELL DEATH DIFFER, V14, P1202, DOI 10.1038/sj.cdd.4402114
   Slavin D, 1999, BIOL REPROD, V61, P1586, DOI 10.1095/biolreprod61.6.1586
   Slavin DA, 2004, ONCOGENE, V23, P8196, DOI 10.1038/sj.onc.1208020
   Song J, 2006, J GASTROEN HEPATOL, V21, P1286, DOI 10.1111/j.1440-1746.2006.04445.x
   Spinola M, 2007, CANCER LETT, V251, P311, DOI 10.1016/j.canlet.2006.11.029
   Spitz F, 2012, NAT REV GENET, V13, P613, DOI 10.1038/nrg3207
   Starkel P, 2003, J HEPATOL, V39, P538, DOI 10.1016/S0168-8278(03)00360-X
   Stelzl U, 2005, CELL, V122, P957, DOI 10.1016/j.cell.2005.08.029
   Sugiyama S, 2019, GENES CELLS, V24, P354, DOI 10.1111/gtc.12680
   Suzuki T, 1998, J BIOCHEM, V124, P389, DOI 10.1093/oxfordjournals.jbchem.a022124
   Syafruddin SE, 2019, NAT COMMUN, V10, DOI 10.1038/s41467-019-09116-x
   Sydor S, 2017, SCI REP-UK, V7, DOI 10.1038/s41598-017-08680-w
   Tahara E, 2009, CANCER BIOL THER, V8, P801, DOI 10.4161/cbt.8.9.8186
   Tallack MR, 2010, IUBMB LIFE, V62, P886, DOI 10.1002/iub.404
   Tang ZF, 2017, NUCLEIC ACIDS RES, V45, pW98, DOI 10.1093/nar/gkx247
   Tarabishi R, 2005, KIDNEY INT, V68, P1511, DOI 10.1111/j.1523-1755.2005.00563.x
   Turner J, 1999, TRENDS BIOCHEM SCI, V24, P236, DOI 10.1016/S0968-0004(99)01406-1
   Udeshi ND, 2013, MOL CELL PROTEOMICS, V12, P825, DOI 10.1074/mcp.O112.027094
   Wang ZM, 2018, SCI REP-UK, V8, DOI 10.1038/s41598-018-31101-5
   Warke VG, 2003, J BIOL CHEM, V278, P14812, DOI 10.1074/jbc.M300787200
   Wolfe SA, 2000, ANNU REV BIOPH BIOM, V29, P183, DOI 10.1146/annurev.biophys.29.1.183
   Xue YY, 2017, DEV CELL, V42, P349, DOI 10.1016/j.devcel.2017.07.012
   Yamashita K, 2002, CANCER CELL, V2, P485, DOI 10.1016/S1535-6108(02)00215-5
   Yang YH, 2019, BIOL OPEN, V8, DOI 10.1242/bio.040121
   Yea S, 2008, GASTROENTEROLOGY, V134, P1521, DOI 10.1053/j.gastro.2008.02.015
   Yin CY, 2013, J CLIN INVEST, V123, P1902, DOI 10.1172/JCI66369
   Yu TY, 2020, INT J BIOL SCI, V16, P2340, DOI 10.7150/ijbs.46573
   Zhang B, 2018, EUR J CANCER PREV, V27, P20, DOI 10.1097/CEJ.0000000000000410
   Zhang N, 2019, J CANCER, V10, P5324, DOI 10.7150/jca.34212
   Zhang XY, 2012, TUMOR BIOL, V33, P1589, DOI 10.1007/s13277-012-0414-3
   Zhang Y, 2014, J BIOL CHEM, V289, P12876, DOI 10.1074/jbc.M113.535831
   Zhang Y, 2020, FRONT PHYSIOL, V11, DOI 10.3389/fphys.2020.00510
   Zhao XA, 2010, DEV BIOL, V344, P79, DOI 10.1016/j.ydbio.2010.04.018
   Zou XZ, 2017, PULM PHARMACOL THER, V44, P70, DOI 10.1016/j.pupt.2017.03.012
NR 151
TC 9
Z9 9
U1 1
U2 5
PU MDPI
PI BASEL
PA ST ALBAN-ANLAGE 66, CH-4052 BASEL, SWITZERLAND
EI 2218-273X
J9 BIOMOLECULES
JI Biomolecules
PD OCT
PY 2020
VL 10
IS 10
AR 1378
DI 10.3390/biom10101378
PG 22
WC Biochemistry & Molecular Biology
WE Science Citation Index Expanded (SCI-EXPANDED)
SC Biochemistry & Molecular Biology
GA OJ6AP
UT WOS:000584042000001
PM 32998281
OA gold, Green Accepted, Green Published
DA 2022-04-10
ER

PT J
AU Sabbir, MG
AF Sabbir, Mohammad Golam
TI Progesterone induced Warburg effect in HEK293 cells is associated with
   post-translational modification and proteasomal degradation of
   progesterone receptor membrane component 1
SO JOURNAL OF STEROID BIOCHEMISTRY AND MOLECULAR BIOLOGY
LA English
DT Article
DE Progesterone; Progesterone receptor membrane component 1; Warburg
   effect; Phosphorylation; Sumoylation; Ubiquitination
ID BLUE NATIVE ELECTROPHORESIS; PROTEIN-QUALITY CONTROL; BINDING-PROTEIN;
   PERFORMANCE-CHARACTERISTICS; DEPENDENT DEGRADATION; GRANULOSA-CELLS;
   PGRMC1; AUTOPHAGY; PROMOTES; PHOSPHORYLATION
AB Progesterone (P4) is a major steroid hormone that has important effects on metabolism. The progesterone receptor membrane component 1 (PGRMC1) is a non-canonical P4 binding protein. The biological functions affected by PGRMC1 include cholesterol/steroid biosynthesis and metabolism, iron homeostasis and heme trafficking, autophagy, regulation of cell cycle and proliferation, cell migration and invasion. PGRMC1 has been an attractive target for therapeutic intervention in cancer and neurodegenerative disorders due to its biological role in promoting cell survival. P4 has been used in a number of clinical applications and is considered neuroprotective. The involvement of PGRMC1 in P4-mediated regulation of cellular glucose metabolism is not well studied. PGRMC1 is a 21 kDa protein but complex post-translational modification (PTMs) lead to the existence of several high molecular mass proteins whose molecular function, intracellular distribution, and physiological relevancies are not fully known. Therefore, in this study, P4-PGRMC1-mediated cellular glucose metabolism and PTMs of PGRMC1 were studied using wild-type and CRISPR/Cas9 mediated PGRMC1 knockout (KO) human embryonic kidney-derived (HEK293) cell lines. A 70 kDa (p70) and 100 kDa (p100) PGRMC1 proteins were identified that are predominantly associated with endoplasmic reticulum/mitochondria and nuclear fractions in the cells, respectively. Phosphorylation, acetylation, ubiquitination, and sumoylation of native PGRMC1 under serum starvation were identified which provided an explanation for the higher molecular masses. This study indicates that P4-PGRMC1 signaling caused a rapid increase in glycolysis in the presence of oxygen (aerobic glycolysis) and a corresponding decrease in cellular respiration, known as the Warburg effect. Further, it was demonstrated that the P4-induced increase in glycolysis is associated with rapid proteasomal degradation of the p70 and reduction of the nuclear p100 protein level. P4 treatment also caused significant alteration in the dynamics of PGRMC1 PTMs and its association with potential interacting proteins. Overall, this study provides a hitherto unknown aspect of P4-PGRMC1 mediated signaling that changes basic cellular metabolism in HEK293 cells.
C1 [Sabbir, Mohammad Golam] St Boniface Gen Hosp, Canadian Ctr Agrifood Res Hlth & Med, Res Ctr, Winnipeg, MB R2H 2A6, Canada.
RP Sabbir, MG (corresponding author), St Boniface Gen Hosp, Canadian Ctr Agrifood Res Hlth & Med, Albrechtsen Res Ctr, Room R2034,351 Tache Ave, Winnipeg, MB R2H 2A6, Canada.
EM mgsabbir@sbrc.ca
RI Sabbir, Mohammad/AAG-6238-2019
FU St. Boniface Hospital Albrechtsen Research Centre
FX I sincerely acknowledge Dr. Paul Fernyhough for providing lab space and
   reagents; St. Boniface Hospital Albrechtsen Research Centre for
   additional funding support; Jennifer Chung, Santa Cruz Biotechnology,
   Inc. for providing numerous mouse monoclonal antibodies; Andrew Pobre,
   Medical Laboratory Technologist, Diagnostic Services Manitoba, for
   Electron Microscope sample preparation; Laura Curtis, research
   specialist, Diagnostic Services Manitoba, for access to Electron
   Microscope facility; Dr. Sanjiv Dhingra for providing MG132 inhibitor;
   Ying Lao, Manitoba Centre for Proteomics and Systems Biology, for mass
   spectrometry data acquisition; Dr. Peter Zahradka and Dr. Carla Taylor
   for providing laboratory space and critically reading the manuscript;
   Dr. Samantha Pauls for critically reading the manuscript.
CR Ahmed IS, 2010, J PHARMACOL EXP THER, V333, P564, DOI 10.1124/jpet.109.164210
   Ahmed ISA, 2012, EXPERT OPIN DRUG MET, V8, P361, DOI 10.1517/17425255.2012.658367
   Bali N, 2012, ENDOCRINOLOGY, V153, P759, DOI 10.1210/en.2011-1699
   Bas-Orth C, 2017, J BIOL CHEM, V292, P5183, DOI 10.1074/jbc.M116.761106
   Boban M, 2016, NUCLEUS-PHILA, V7, P41, DOI 10.1080/19491034.2016.1139273
   Cahill MA, 2007, J STEROID BIOCHEM, V105, P16, DOI 10.1016/j.jsbmb.2007.02.002
   Cahill MA, 2016, BBA-REV CANCER, V1866, P339, DOI 10.1016/j.bbcan.2016.07.004
   Cahill MA, 2016, ONCOTARGET, V7, P50822, DOI 10.18632/oncotarget.10691
   Callige M, 2005, MOL CELL BIOL, V25, P4349, DOI 10.1128/MCB.25.11.4349-4358.2005
   Callige Mathilde, 2006, Nucl Recept Signal, V4, pe004
   Cao ZM, 2009, ENDOCR RES, V34, P101, DOI 10.3109/07435800903204082
   Craven RJ, 2008, BREAST CANCER RES, V10, DOI 10.1186/bcr2191
   Crudden G, 2005, TUMOR BIOL, V26, P142, DOI 10.1159/000086485
   DAWOOD MY, 1975, OBSTET GYNECOL, V45, P171
   Dohmen RJ, 2004, BBA-MOL CELL RES, V1695, P113, DOI 10.1016/j.bbamcr.2004.09.021
   Dou ZX, 2016, AUTOPHAGY, V12, P1416, DOI 10.1080/15548627.2015.1127465
   Dou ZX, 2015, NATURE, V527, P105, DOI 10.1038/nature15548
   DUNN OJ, 1964, TECHNOMETRICS, V6, P241, DOI 10.2307/1266041
   Enserink JM, 2017, ADV EXP MED BIOL, V963, P89, DOI 10.1007/978-3-319-50044-7_5
   Escobar-Ramirez A, 2015, PLOS ONE, V10, DOI 10.1371/journal.pone.0129965
   Fagerberg L, 2014, MOL CELL PROTEOMICS, V13, P397, DOI 10.1074/mcp.M113.035600
   Feinshtein V, 2010, ARCH GYNECOL OBSTET, V281, P387, DOI 10.1007/s00404-009-1125-x
   Fiala GJ, 2011, JOVE-J VIS EXP, DOI 10.3791/2164
   Fleseriu M, 2006, J NEURO-ONCOL, V79, P41, DOI 10.1007/s11060-005-9108-7
   Frezza C, 2007, NAT PROTOC, V2, P287, DOI 10.1038/nprot.2006.478
   Friel AM, 2015, CANCER LETT, V356, P434, DOI 10.1016/j.canlet.2014.09.036
   Furuya Y, 2001, J UROLOGY, V166, P213, DOI 10.1016/S0022-5347(05)66117-4
   Pina-Medina AG, 2016, STEROIDS, V105, P19, DOI 10.1016/j.steroids.2015.11.008
   Garg D, 2017, TRENDS ENDOCRIN MET, V28, P656, DOI 10.1016/j.tem.2017.05.006
   Goldberg AL, 2012, J CELL BIOL, V199, P583, DOI 10.1083/jcb.201210077
   Deniselle MCG, 2012, J NEUROCHEM, V122, P185, DOI 10.1111/j.1471-4159.2012.07753.x
   Gras F, 2007, DIABETOLOGIA, V50, P2544, DOI 10.1007/s00125-007-0836-4
   Hartig Sean M, 2013, Curr Protoc Mol Biol, VChapter 14, DOI 10.1002/0471142727.mb1415s102
   Hornbeck PV, 2015, NUCLEIC ACIDS RES, V43, pD512, DOI 10.1093/nar/gku1267
   Hornbeck PV, 2012, NUCLEIC ACIDS RES, V40, pD261, DOI 10.1093/nar/gkr1122
   Hornick JR, 2012, SURGERY, V152, pS152, DOI 10.1016/j.surg.2012.05.014
   Hughes AL, 2007, CELL METAB, V5, P143, DOI 10.1016/j.cmet.2006.12.009
   Hunter T, 2007, MOL CELL, V28, P730, DOI 10.1016/j.molcel.2007.11.019
   Izzo NJ, 2014, PLOS ONE, V9, DOI 10.1371/journal.pone.0111899
   Jones RD, 2016, CURR OPIN CELL BIOL, V40, P81, DOI 10.1016/j.ceb.2016.03.002
   JONES S, 1995, PROG BIOPHYS MOL BIO, V63, P31, DOI 10.1016/0079-6107(94)00008-W
   Kabe Y, 2016, NAT COMMUN, V7, DOI 10.1038/ncomms11030
   KLINZ FJ, 1994, EUR J BIOCHEM, V225, P99, DOI 10.1111/j.1432-1033.1994.00099.x
   Krebs CJ, 2000, P NATL ACAD SCI USA, V97, P12816, DOI 10.1073/pnas.97.23.12816
   Lange CA, 2000, P NATL ACAD SCI USA, V97, P1032, DOI 10.1073/pnas.97.3.1032
   Leidal AM, 2015, DEV CELL, V35, P529, DOI 10.1016/j.devcel.2015.11.016
   Li AM, 2013, CYTOTECHNOLOGY, V65, P71, DOI 10.1007/s10616-012-9458-x
   Liberti MV, 2016, TRENDS BIOCHEM SCI, V41, P211, DOI 10.1016/j.tibs.2015.12.001
   Lopez MF, 2010, CLIN CHEM, V56, P281, DOI 10.1373/clinchem.2009.137323
   Lu BY, 2010, ANAL BIOCHEM, V405, P67, DOI 10.1016/j.ab.2010.05.011
   Mallory JC, 2005, MOL CELL BIOL, V25, P1669, DOI 10.1128/MCB.25.5.1669-1679.2005
   Manley SE, 2007, CLIN CHEM, V53, P922, DOI 10.1373/clinchem.2006.077784
   MATTSON G, 1993, MOL BIOL REP, V17, P167, DOI 10.1007/BF00986726
   McWilliam H, 2013, NUCLEIC ACIDS RES, V41, pW597, DOI 10.1093/nar/gkt376
   Mifsud W, 2002, GENOME BIOL, V3
   Mir SUR, 2013, AUTOPHAGY, V9, P1566, DOI 10.4161/auto.25889
   Mir SUR, 2012, INT J CANCER, V131, pE1, DOI 10.1002/ijc.26432
   Mongia SK, 2006, AM J CLIN PATHOL, V125, P921, DOI 10.1309/NBA312W0LANRXYH9
   Muller-Taubenberger A, 2001, EMBO J, V20, P6772, DOI 10.1093/emboj/20.23.6772
   Nawaz Z, 1999, P NATL ACAD SCI USA, V96, P1858, DOI 10.1073/pnas.96.5.1858
   Neubauer H, 2008, BREAST CANCER RES, V10, DOI 10.1186/bcr2155
   Nie AY, 2006, MOL CARCINOGEN, V45, P914, DOI 10.1002/mc.20205
   Pace CN, 2014, FEBS LETT, V588, P2177, DOI 10.1016/j.febslet.2014.05.006
   Peluso JJ, 2010, MOL CELL ENDOCRINOL, V320, P153, DOI 10.1016/j.mce.2010.02.005
   Peluso JJ, 2008, J CLIN ENDOCR METAB, V93, P1592, DOI 10.1210/jc.2007-2771
   Peluso JJ, 2008, ENDOCRINOLOGY, V149, P534, DOI 10.1210/en.2007-1050
   Peluso JJ, 2007, SEMIN REPROD MED, V25, P198, DOI 10.1055/s-2007-973432
   Peluso JJ, 2012, ENDOCRINOLOGY, V153, P3929, DOI 10.1210/en.2011-2096
   Piel RB, 2016, BIOCHEMISTRY-US, V55, P5204, DOI 10.1021/acs.biochem.6b00756
   Piette P, 2018, CLIMACTERIC, V21, P308, DOI 10.1080/13697137.2018.1462792
   Rawlins ML, 2004, CLIN CHEM, V50, P2338, DOI 10.1373/clinchem.2004.039156
   Rock KL, 1999, ANNU REV IMMUNOL, V17, P739, DOI 10.1146/annurev.immunol.17.1.739
   Rodriguez JA, 2014, SEMIN CANCER BIOL, V27, P11, DOI 10.1016/j.semcancer.2014.03.005
   Sabbir MG, 2016, BIOL OPEN, V5, P452, DOI 10.1242/bio.015859
   Salmena L, 2007, NAT REV CANCER, V7, P409, DOI 10.1038/nrc2145
   SCHAGGER H, 1994, ANAL BIOCHEM, V217, P220, DOI 10.1006/abio.1994.1112
   SCHAGGER H, 1991, ANAL BIOCHEM, V199, P223, DOI 10.1016/0003-2697(91)90094-A
   Segerer SE, 2009, AM J REPROD IMMUNOL, V62, P165, DOI 10.1111/j.1600-0897.2009.00726.x
   Selmin O, 1996, CARCINOGENESIS, V17, P2609, DOI 10.1093/carcin/17.12.2609
   Shanmugam AK, 2016, CURR EYE RES, V41, P1105, DOI 10.3109/02713683.2015.1085579
   Shcherbik N, 2004, J CELL BIOCHEM, V93, P11, DOI 10.1002/jcb.20130
   Siegel S, 1956, MCGRAW HILL SERIES P MCGRAW HILL SERIES P, P312
   Sjostedt E, 2015, PLOS ONE, V10, DOI 10.1371/journal.pone.0130028
   Strzyz P, 2015, NAT REV MOL CELL BIO, V16, P700, DOI 10.1038/nrm4091
   Tan B, 2015, ANIM NUTR, V1, P239, DOI 10.1016/j.aninu.2015.08.004
   Terzaghi L, 2018, REPRODUCTION, V155, P273, DOI 10.1530/REP-17-0534
   TULCHINSKY D, 1972, AM J OBSTET GYNECOL, V112, P1095, DOI 10.1016/0002-9378(72)90185-8
   Uhlen M, 2005, MOL CELL PROTEOMICS, V4, P1920, DOI 10.1074/mcp.M500279-MCP200
   WEBER K, 1971, J BIOL CHEM, V246, P4504
   Wei J, 2013, ACTA PHARMACOL SIN, V34, P1485, DOI 10.1038/aps.2013.160
   WEISS G, 1975, OBSTET GYNECOL, V46, P557
   Willibald M, 2017, HORM METAB RES, V49, P595, DOI 10.1055/s-0043-113635
   Wittig I, 2006, NAT PROTOC, V1, P418, DOI 10.1038/nprot.2006.62
   Witze ES, 2007, NAT METHODS, V4, P798, DOI 10.1038/nmeth1100
   Wood GA, 2007, REPRODUCTION, V133, P1035, DOI 10.1530/REP-06-0302
   Wotton D, 2017, ADV EXP MED BIOL, V963, P35, DOI 10.1007/978-3-319-50044-7_3
   Wu W, 2011, MOL HUM REPROD, V17, P233, DOI 10.1093/molehr/gaq096
   Xiu FM, 2016, PLOS ONE, V11, DOI 10.1371/journal.pone.0153304
   Xu JB, 2011, NAT COMMUN, V2, DOI 10.1038/ncomms1386
   Xu YP, 2011, J REPROD IMMUNOL, V91, P17, DOI 10.1016/j.jri.2011.06.101
   Yamamoto T, 2015, METHODS MOL BIOL, V1348, P303, DOI 10.1007/978-1-4939-2999-3_26
   Zhang J, 2012, NAT PROTOC, V7, P1068, DOI 10.1038/nprot.2012.048
   Zhang L, 2008, MOL CELL ENDOCRINOL, V287, P81, DOI 10.1016/j.mce.2008.02.012
   Zhong Xiaotian, 2013, Int J Cell Biol, V2013, P273086, DOI 10.1155/2013/273086
NR 104
TC 12
Z9 12
U1 0
U2 4
PU PERGAMON-ELSEVIER SCIENCE LTD
PI OXFORD
PA THE BOULEVARD, LANGFORD LANE, KIDLINGTON, OXFORD OX5 1GB, ENGLAND
SN 0960-0760
J9 J STEROID BIOCHEM
JI J. Steroid Biochem. Mol. Biol.
PD JUL
PY 2019
VL 191
AR 105376
DI 10.1016/j.jsbmb.2019.105376
PG 15
WC Biochemistry & Molecular Biology; Endocrinology & Metabolism
WE Science Citation Index Expanded (SCI-EXPANDED)
SC Biochemistry & Molecular Biology; Endocrinology & Metabolism
GA IH4ZK
UT WOS:000474500500018
PM 31067491
DA 2022-04-10
ER

PT J
AU Rasooly, A
   Jacobson, J
AF Rasooly, A
   Jacobson, J
TI Development of biosensors for cancer clinical testing
SO BIOSENSORS & BIOELECTRONICS
LA English
DT Article
DE cancer diagnostics; biosensors; point of care testing; molecular
   signatures; ligands
ID PARAFFIN-EMBEDDED TISSUES; IMMUNOMAGNETIC CELL ENRICHMENT;
   POLYMERASE-CHAIN-REACTION; RT-PCR ANALYSIS; PROMOTER HYPERMETHYLATION;
   BREAST-CANCER; BONE-MARROW; TUMOR-CELLS; COLORECTAL-CANCER; DNA
   METHYLATION
AB Biosensors are devices that combine a biochemical recognition/binding element (ligand) with a signal conversion unit (transducer). Biosensors are already used for several clinical applications, for example for electrochemical measurement of blood glucose concentrations. Application of biosensors in cancer clinical testing has several potential advantages over other clinical analysis methods including increased assay speed and flexibility, capability for multi-target analyses, automation, reduced costs of diagnostic testing and a potential to bring molecular diagnostic assays to community health care systems and to underserved populations. They have the potential for facilitating Point of Care Testing (POCT), where state-of-the-art molecular analysis is carried out without requiring a state-of-the-art laboratory. However, not many biosensors have been developed for cancer-related testing. One major challenge in harnessing the potential of biosensors is that cancer is a very complex set of diseases. Tumors vary widely in etiology and pathogenesis. Oncologists rely heavily on histological characterization of tumors and a few biomarkers that have demonstrated clinical utility to aid in patient management decisions. New genomic and proteomic molecular tools are being used to profile tumors and produce "molecular signatures." These signatures include genetic and epigenetic signatures, changes in gene expression, protein profiles and post-translational modification of proteins. These molecular signatures provide new opportunities for utilizing biosensors. Biosensors have enormous potential to deliver the promise of new molecular diagnostic strategies to patients. This article describes some of the basic elements of cancer biology and cancer biomarkers relevant for the development of biosensors for cancer clinical testing, along with the challenges in using this approach. (c) 2006 Elsevier B.V. All rights reserved.
C1 NCI, NIH, CDP, Rockville, MD 20852 USA.
   US FDA, Div Biol Sci, Off Sci & Engn Labs, Ctr Devices & Radiol Hlth, Rockville, MD 20857 USA.
RP Rasooly, A (corresponding author), NCI, NIH, CDP, 6130 Execut Blvd EPN,6035A, Rockville, MD 20852 USA.
EM rasoolya@mail.nih.gov
RI Rasooly, Avraham/AAH-4518-2021
CR Abrahamsen HN, 2003, J MOL DIAGN, V5, P34, DOI 10.1016/S1525-1578(10)60449-7
   Abrantes M, 2001, ANAL CHEM, V73, P2828, DOI 10.1021/ac0100042
   Allan AL, 2005, CYTOM PART A, V65A, P4, DOI 10.1002/cyto.a.20132
   Balch C, 2005, FRONT BIOSCI-LANDMRK, V10, P1897, DOI 10.2741/1668
   Baller MK, 2000, ULTRAMICROSCOPY, V82, P1, DOI 10.1016/S0304-3991(99)00123-0
   Bannister AJ, 2004, METHOD ENZYMOL, V376, P269
   Bielawski K, 2001, INT J MOL MED, V8, P573
   Blackburn EH, 2005, FEBS LETT, V579, P859, DOI 10.1016/j.febslet.2004.11.036
   Bracken AP, 2003, EMBO J, V22, P5323, DOI 10.1093/emboj/cdg542
   Bruchez M, 1998, SCIENCE, V281, P2013, DOI 10.1126/science.281.5385.2013
   Chan WCW, 1998, SCIENCE, V281, P2016, DOI 10.1126/science.281.5385.2016
   CHANG CY, 2005, MOL ENDOCRINOL
   Choesmel V, 2004, BREAST CANCER RES, V6, pR556, DOI 10.1186/bcr898
   Claus R, 2003, ONCOGENE, V22, P6489, DOI 10.1038/sj.onc.1206814
   Collett JR, 2005, ANAL BIOCHEM, V338, P113, DOI 10.1016/j.ab.2004.11.027
   Cunningham JM, 1998, CANCER RES, V58, P3455
   Diaz-Cano SJ, 1997, DIAGN MOL PATHOL, V6, P342, DOI 10.1097/00019606-199712000-00006
   Dlubek D, 2002, EUR J HAEMATOL, V68, P281, DOI 10.1034/j.1600-0609.2002.01682.x
   Dong CK, 2005, CRIT REV ONCOL HEMAT, V54, P85, DOI 10.1016/j.critrevonc.2004.12.005
   Dumur CI, 2003, GENOMICS, V81, P260, DOI 10.1016/S0888-7543(03)00020-X
   EASTON D, 1993, CANCER SURV, V18, P95
   EELES RA, 1994, EUR J CANCER, V30A, P1383, DOI 10.1016/0959-8049(94)90190-2
   Emmert-Buck MR, 2000, AM J PATHOL, V156, P1109, DOI 10.1016/S0002-9440(10)64979-6
   Esteller M, 2000, CANCER RES, V60, P4366
   Esteller M, 2000, JNCI-J NATL CANCER I, V92, P564, DOI 10.1093/jnci/92.7.564
   Esteller M, 2000, CANCER RES, V60, P2368
   Esteller M, 2000, EUR J CANCER, V36, P2294, DOI 10.1016/S0959-8049(00)00303-8
   Famulok M, 1998, CURR OPIN CHEM BIOL, V2, P320, DOI 10.1016/S1367-5931(98)80004-5
   Feuerer M, 2001, INT J CANCER, V92, P96, DOI 10.1002/1097-0215(200102)9999:9999<::AID-IJC1152>3.3.CO;2-H
   Fritz J, 2000, SCIENCE, V288, P316, DOI 10.1126/science.288.5464.316
   Furdui VI, 2004, LAB CHIP, V4, P614, DOI 10.1039/b409366f
   GALLIE BL, 1984, OPHTHALMOLOGY, V91, P666
   Gloghini A, 2004, J MOL DIAGN, V6, P290, DOI 10.1016/S1525-1578(10)60524-7
   Goldsworthy SM, 1999, MOL CARCINOGEN, V25, P86, DOI 10.1002/(SICI)1098-2744(199906)25:2<86::AID-MC2>3.3.CO;2-W
   Gulliksen A, 2005, LAB CHIP, V5, P416, DOI 10.1039/b415525d
   Hamamoto R, 2004, NAT CELL BIOL, V6, P731, DOI 10.1038/ncb1151
   Hanahan D, 2000, CELL, V100, P57, DOI 10.1016/S0092-8674(00)81683-9
   Hansen KM, 2001, ANAL CHEM, V73, P1567, DOI 10.1021/ac0012748
   Hashimoto K, 2001, LAB CHIP, V1, P61, DOI 10.1039/b103851f
   Hu XC, 2003, ONCOLOGY-BASEL, V64, P160, DOI 10.1159/000067776
   Huang Jing, 2004, Human Genomics, V1, P287
   Ikeda K, 1998, J HISTOCHEM CYTOCHEM, V46, P397, DOI 10.1177/002215549804600314
   Jones  LK, 2002, BRIT J HAEMATOL, V118, P714, DOI 10.1046/j.1365-2141.2002.03586.x
   Jones PA, 1999, NAT GENET, V21, P163, DOI 10.1038/5947
   Jones PA, 2002, ONCOGENE, V21, P5358, DOI 10.1038/sj.onc.1205597
   Kalebic T, 2003, ANN NY ACAD SCI, V983, P278, DOI 10.1111/j.1749-6632.2003.tb05982.x
   Kielhorn E, 2002, CANCER, V94, P205, DOI 10.1002/cncr.10193
   Kraemer PS, 2004, CYTOM PART A, V60A, P1, DOI 10.1002/cyto.a.20041
   Krivacic RT, 2004, P NATL ACAD SCI USA, V101, P10501, DOI 10.1073/pnas.0404036101
   Kurita R, 2002, LAB CHIP, V2, P34, DOI 10.1039/b108803n
   Lara O, 2004, EXP HEMATOL, V32, P891, DOI 10.1016/j.exphem.2004.07.007
   Lavau C, 2000, EMBO J, V19, P4655, DOI 10.1093/emboj/19.17.4655
   Leslie NR, 2004, BIOCHEM J, V382, P1, DOI 10.1042/BJ20040825
   Liang GG, 2002, METHODS, V27, P150, DOI 10.1016/S1046-2023(02)00068-3
   Ligler FS, 2003, ANAL BIOANAL CHEM, V377, P469, DOI 10.1007/s00216-003-1992-0
   Macgregor PF, 2002, CLIN CHEM, V48, P1170
   MCSHANE LM, 2005, J CLIN ONCOL
   Medintz IL, 2003, NAT MATER, V2, P630, DOI 10.1038/nmat961
   MERCER W E, 1992, Critical Reviews in Eukaryotic Gene Expression, V2, P251
   Mitchell P, 2001, NAT BIOTECHNOL, V19, P717, DOI 10.1038/90754
   Mohamed H, 2004, IEEE T NANOBIOSCI, V3, P251, DOI 10.1109/TNB.2004.837903
   Mondello C, 2004, BIOCHEM CELL BIOL, V82, P498, DOI 10.1139/O04-048
   Nath N, 2001, J AM CHEM SOC, V123, P8197, DOI 10.1021/ja015585r
   Nguyen CT, 2001, NUCLEIC ACIDS RES, V29, P4598, DOI 10.1093/nar/29.22.4598
   Opitz OG, 2005, CURR MOL MED, V5, P219, DOI 10.2174/1566524053586626
   Page MJ, 1999, P NATL ACAD SCI USA, V96, P12589, DOI 10.1073/pnas.96.22.12589
   Paik S, 2004, NEW ENGL J MED, V351, P2817, DOI 10.1056/NEJMoa041588
   PERRY ME, 1993, CURR OPIN GENET DEV, V3, P50, DOI 10.1016/S0959-437X(05)80340-5
   Rak J, 1995, CANCER METAST REV, V14, P263, DOI 10.1007/BF00690598
   Ransohoff DF, 2003, SCIENCE, V299, P1679, DOI 10.1126/science.1083158
   Reid LH, 1996, CANCER RES, V56, P1214
   Robert V, 2000, CARCINOGENESIS, V21, P563, DOI 10.1093/carcin/21.4.563
   Rosenberg R, 2002, CYTOMETRY, V49, P150, DOI 10.1002/cyto.10161
   Shaikh KA, 2005, P NATL ACAD SCI USA, V102, P9745, DOI 10.1073/pnas.0504082102
   Shibutani M, 2000, LAB INVEST, V80, P199, DOI 10.1038/labinvest.3780023
   Shukla GS, 2005, ONCOL REP, V13, P757
   Specht K, 2000, J MOL MED-JMM, V78, pB27
   Stanta G, 1998, METH MOL B, V86, P23
   Stokes DL, 2001, FRESEN J ANAL CHEM, V369, P295, DOI 10.1007/s002160000660
   Strate LL, 2005, CANCER CAUSE CONTROL, V16, P201, DOI 10.1007/s10552-004-3488-4
   Taitt CR, 2005, BIOSENS BIOELECTRON, V20, P2470, DOI 10.1016/j.bios.2004.10.026
   THIBODEAU SN, 1993, SCIENCE, V260, P816, DOI 10.1126/science.8484122
   Torres FE, 2004, P NATL ACAD SCI USA, V101, P9517, DOI 10.1073/pnas.0403573101
   Trojan J, 2000, GUT, V47, P272, DOI 10.1136/gut.47.2.272
   Ukraintseva SV, 2004, ANN NY ACAD SCI, V1019, P200, DOI 10.1196/annals.1297.032
   Ulmer A, 2004, CLIN CANCER RES, V10, P531, DOI 10.1158/1078-0432.CCR-0424-03
   Varma MM, 2004, OPT LETT, V29, P950, DOI 10.1364/OL.29.000950
   Wang HY, 2005, GENOME RES, V15, P276, DOI 10.1101/gr.2885205
   Wang PC, 2002, J CHROMATOGR A, V942, P115, DOI 10.1016/S0021-9673(01)01399-1
   Weihrauch MR, 2002, CLIN EXP METASTAS, V19, P617, DOI 10.1023/A:1020988227349
   Weihrauch MR, 2002, J CLIN ONCOL, V20, P4338, DOI 10.1200/JCO.2002.02.152
   Weirich G, 1997, MOL BIOTECHNOL, V8, P299, DOI 10.1007/BF02760783
   Woelfle U, 2005, J IMMUNOL METHODS, V300, P136, DOI 10.1016/j.jim.2005.03.006
   Wu GH, 2001, NAT BIOTECHNOL, V19, P856, DOI 10.1038/nbt0901-856
   Yeates TO, 2002, CELL, V111, P5, DOI 10.1016/S0092-8674(02)01010-3
   Yu YH, 2003, ANN NY ACAD SCI, V983, P268, DOI 10.1111/j.1749-6632.2003.tb05981.x
   Zhen Cai, 2004, Genomics Proteomics & Bioinformatics, V2, P152
   Zieglschmid V, 2005, ANTICANCER RES, V25, P1803
   Zigeuner RE, 2000, J UROLOGY, V164, P1834, DOI 10.1016/S0022-5347(05)67116-9
   Zigeuner RE, 2003, J UROLOGY, V169, P701, DOI 10.1016/S0022-5347(05)63996-1
NR 100
TC 131
Z9 133
U1 6
U2 75
PU ELSEVIER ADVANCED TECHNOLOGY
PI OXFORD
PA OXFORD FULFILLMENT CENTRE THE BOULEVARD, LANGFORD LANE, KIDLINGTON,
   OXFORD OX5 1GB, OXON, ENGLAND
SN 0956-5663
EI 1873-4235
J9 BIOSENS BIOELECTRON
JI Biosens. Bioelectron.
PD APR 15
PY 2006
VL 21
IS 10
BP 1851
EP 1858
DI 10.1016/j.bios.2006.01.003
PG 8
WC Biophysics; Biotechnology & Applied Microbiology; Chemistry, Analytical;
   Electrochemistry; Nanoscience & Nanotechnology
WE Science Citation Index Expanded (SCI-EXPANDED)
SC Biophysics; Biotechnology & Applied Microbiology; Chemistry;
   Electrochemistry; Science & Technology - Other Topics
GA 032EG
UT WOS:000236756100002
PM 16458498
DA 2022-04-10
ER

PT J
AU Arriazu, E
   Pippa, R
   Odero, MD
AF Arriazu, Elena
   Pippa, Raffaella
   Odero, Maria D.
TI Protein Phosphatase 2A as a Therapeutic Target in Acute Myeloid Leukemia
SO FRONTIERS IN ONCOLOGY
LA English
DT Review
DE PP2A; SET; AML; FTY720; OP449
ID CHRONIC LYMPHOCYTIC-LEUKEMIA; TUMOR-SUPPRESSOR PP2A; REGULATORY SUBUNIT
   B55-ALPHA; TYROSINE KINASE INHIBITORS; A-BETA-SUBUNIT; BREAST-CANCER;
   C-MYC; COMMON EVENT; SET-CAN; CIP2A
AB Acute myeloid leukemia (AML) is a heterogeneous malignant disorder of hematopoietic progenitor cells in which several genetic and epigenetic aberrations have been described. Despite progressive advances in our understanding of the molecular biology of this disease, the outcome for most patients is poor. It is, therefore, necessary to develop more effective treatment strategies. Genetic aberrations affecting kinases have been widely studied in AML; however, the role of phosphatases remains underexplored. Inactivation of the tumor-suppressor protein phosphatase 2A (PP2A) is frequent in AML patients, making it a promising target for therapy. There are several PP2A inactivating mechanism reported in this disease. Deregulation or specific post-translational modification of PP2A subunits have been identified as a cause of PP2A malfunction, which lead to deregulation of proliferation or apoptosis pathway, depending on the subunit affected. Likewise, overexpression of either SET or cancerous inhibitor of protein phosphatase 2A, endogenous inhibitors of PP2A, is a recurrent event in AML that impairs PP2A activity, contributing to leukemogenesis progression. Interestingly, the anticancer activity of several PP2A-activating drugs (PADs) depends on interaction/sequestration of SET. Preclinical studies show that pharmacological restoration of PP2A activity by PADs effectively antagonizes leukemogenesis, and that these drugs have synergistic cytotoxic effects with conventional chemotherapy and kinase inhibitors, opening new possibilities for personalized treatment in AML patients, especially in cases with SET-dependent inactivation of PP2A. Here, we review the role of PP2A as a druggable tumor suppressor in AML.
C1 [Arriazu, Elena; Odero, Maria D.] Univ Navarra, Ctr Appl Med Res CIMA, Hematol Oncol Program, E-31080 Pamplona, Spain.
   [Pippa, Raffaella] Univ Dundee, Ctr Gene Regulat & Express, Dundee, Scotland.
   [Odero, Maria D.] Univ Navarra, Dept Biochem & Genet, E-31080 Pamplona, Spain.
   [Odero, Maria D.] Inst Invest Sanitaria Navarra IdiSNA, Pamplona, Spain.
RP Odero, MD (corresponding author), Univ Navarra, Ctr Appl Med Res CIMA, Hematol Oncol Program, E-31080 Pamplona, Spain.; Odero, MD (corresponding author), Univ Navarra, Dept Biochem & Genet, E-31080 Pamplona, Spain.; Odero, MD (corresponding author), Inst Invest Sanitaria Navarra IdiSNA, Pamplona, Spain.
EM modero@unav.es
RI Odero/ABG-9860-2020; Pippa, Raffaella/AAH-8047-2020; Pippa,
   Raffaella/J-4566-2012
OI Odero/0000-0002-8858-2054; Pippa, Raffaella/0000-0002-1028-6511; Pippa,
   Raffaella/0000-0002-1028-6511
FU Ministerio de Economia y CompetitividadSpanish Government [PI14/02073];
   Departamento de Salud del Gobierno de Navarra [29/2015];
   ISCIII-RTICCInstituto de Salud Carlos III [RD12/0036/0063]
FX This work was supported by Ministerio de Economia y Competitividad
   (PI14/02073), integrado en el Plan Estatal de I + D + I 2013-2016 y
   cofinanciado por el ISCIII-Subdireccion General de Evaluacion y Fomento
   de la investigacion y el Fondo Europeo de Desarrollo Regional (FEDER);
   Departamento de Salud del Gobierno de Navarra (29/2015); and
   ISCIII-RTICC (RD12/0036/0063).
CR ADACHI Y, 1994, J BIOL CHEM, V269, P2258
   Agarwal A, 2014, CLIN CANCER RES, V20, P2092, DOI 10.1158/1078-0432.CCR-13-2575
   Al-Murrani SWK, 1999, BIOCHEM J, V341, P293, DOI 10.1042/0264-6021:3410293
   Arnaud L, 2011, FEBS LETT, V585, P2653, DOI 10.1016/j.febslet.2011.07.020
   Arnold HK, 2006, MOL CELL BIOL, V26, P2832, DOI 10.1128/MCB.26.7.2832-2844.2006
   Barragan E, 2015, HAEMATOLOGICA, V100, DOI 10.3324/haematol.2014.118117
   Blalock WL, 2011, LEUKEMIA, V25, P236, DOI 10.1038/leu.2010.264
   Blalock WL, 2009, J CELL PHYSIOL, V221, P232, DOI 10.1002/jcp.21848
   Bononi Angela, 2011, Enzyme Res, V2011, P329098, DOI 10.4061/2011/329098
   Bryan JC, 2015, DRUG AGING, V32, P623, DOI 10.1007/s40266-015-0285-6
   Calin GA, 2000, ONCOGENE, V19, P1191, DOI 10.1038/sj.onc.1203389
   Canela N, 2003, J BIOL CHEM, V278, P1158, DOI 10.1074/jbc.M207497200
   Cervoni N, 2002, J BIOL CHEM, V277, P25026, DOI 10.1074/jbc.M202256200
   Chen LM, 2014, PLOS ONE, V9, DOI 10.1371/journal.pone.0103033
   Chen W, 2004, CANCER CELL, V5, P127, DOI 10.1016/S1535-6108(04)00026-1
   Chen W, 2005, CANCER RES, V65, P8183, DOI 10.1158/0008-5472.CAN-05-1103
   Cheng XD, 2015, BLOOD, V126, P1585, DOI 10.1182/blood-2015-03-635227
   Christensen DJ, 2011, BLOOD, V118, P4150, DOI 10.1182/blood-2011-04-351072
   Ciccone M, 2015, FRONT ONCOL, V5, DOI 10.3389/fonc.2015.00021
   Cohen JA, 2010, NEW ENGL J MED, V362, P402, DOI 10.1056/NEJMoa0907839
   Come C, 2009, CLIN CANCER RES, V15, P5092, DOI 10.1158/1078-0432.CCR-08-3283
   Cristobal I, 2011, LEUKEMIA, V25, P606, DOI 10.1038/leu.2010.294
   Cristobal I, 2015, CLIN CANCER RES, V21, P347, DOI 10.1158/1078-0432.CCR-14-0724
   Cristobal I, 2013, HAEMATOLOGICA, V98, pE103, DOI [10.3324/haematol.2043.084731, 10.3324/haematol.2013.084731]
   Cristobal I, 2012, HAEMATOL-HEMATOL J, V97, P543, DOI 10.3324/haematol.2011.050542
   Cristobal I, 2010, BLOOD, V115, P615, DOI 10.1182/blood-2009-06-227363
   de Mendoza AEH, 2015, J BIOMED NANOTECHNOL, V11, P691, DOI 10.1166/jbn.2015.1944
   Dohner H, 2015, NEW ENGL J MED, V373, P1136, DOI 10.1056/NEJMra1406184
   Dong QZ, 2011, ANN SURG ONCOL, V18, P857, DOI 10.1245/s10434-010-1313-8
   Eichhorn PJA, 2009, BBA-REV CANCER, V1795, P1, DOI 10.1016/j.bbcan.2008.05.005
   Esplin ED, 2006, GENE CHROMOSOME CANC, V45, P182, DOI 10.1002/gcc.20284
   Fan ZS, 2003, CELL, V112, P659, DOI 10.1016/S0092-8674(03)00150-8
   Gallay N, 2009, LEUKEMIA, V23, P1029, DOI 10.1038/leu.2008.395
   Gao XN, 2015, PLOS ONE, V10, DOI 10.1371/journal.pone.0124241
   Grallert A, 2015, NATURE, V517, P94, DOI 10.1038/nature14019
   Haesen D, 2014, FRONT ONCOL, V4, DOI 10.3389/fonc.2014.00347
   Ingwersen J, 2012, CLIN IMMUNOL, V142, P15, DOI [10.1016/j.clim.2011.05.005, 10.1016/j.clim.2011.10.008]
   Irie A, 2012, PLOS ONE, V7, DOI 10.1371/journal.pone.0051242
   Janghorban M, 2014, P NATL ACAD SCI USA, V111, P9157, DOI 10.1073/pnas.1317630111
   Janssens V, 2008, TRENDS BIOCHEM SCI, V33, P113, DOI 10.1016/j.tibs.2007.12.004
   Jin ZG, 2010, J BIOL CHEM, V285, P34493, DOI 10.1074/jbc.M110.169581
   Junttila MR, 2007, CELL, V130, P51, DOI 10.1016/j.cell.2007.04.044
   Kalla C, 2007, EUR J CANCER, V43, P1328, DOI 10.1016/j.ejca.2007.02.005
   Kalousi A, 2015, CELL REP, V11, P149, DOI 10.1016/j.celrep.2015.03.005
   Kandilci A, 2004, LEUKEMIA, V18, P337, DOI 10.1038/sj.leu.2403227
   Kelly LM, 2014, P NATL ACAD SCI USA, V111, P4233, DOI 10.1073/pnas.1321937111
   Khanna A, 2013, CANCER RES, V73, P6548, DOI 10.1158/0008-5472.CAN-13-1994
   Khanna A, 2009, JNCI-J NATL CANCER I, V101, P793, DOI 10.1093/jnci/djp103
   Kuo YC, 2008, J BIOL CHEM, V283, P1882, DOI 10.1074/jbc.M709585200
   Kutney SN, 2004, J BIOL CHEM, V279, P30850, DOI 10.1074/jbc.M404969200
   Lambrecht C, 2013, METHODS MOL BIOL, V1053, P283, DOI 10.1007/978-1-62703-562-0_17
   Letourneux C, 2006, EMBO J, V25, P727, DOI 10.1038/sj.emboj.7600980
   Leulliot N, 2004, J BIOL CHEM, V279, P8351, DOI 10.1074/jbc.M311484200
   Ley TJ, 2013, NEW ENGL J MED, V368, P2059, DOI 10.1056/NEJMoa1301689
   Li M, 1996, J BIOL CHEM, V271, P11059, DOI 10.1074/jbc.271.19.11059
   Liu Q, 2008, BLOOD, V111, P275, DOI 10.1182/blood-2006-10-053884
   Longin S, 2007, J BIOL CHEM, V282, P26971, DOI 10.1074/jbc.M704059200
   Low ICC, 2014, BLOOD, V124, P2223, DOI 10.1182/blood-2014-03-563296
   Lucas CM, 2015, LEUKEMIA, V29, P1514, DOI 10.1038/leu.2015.71
   Lucas CM, 2011, BLOOD, V117, P6660, DOI 10.1182/blood-2010-08-304477
   Luo H, 2005, BLOOD, V106, P2452, DOI 10.1182/blood-2005-02-0734
   Ma J, 2007, ONCOGENE, V26, P5145, DOI 10.1038/sj.onc.1210323
   Marcucci G, 2011, J CLIN ONCOL, V29, P475, DOI 10.1200/JCO.2010.30.2554
   Margolis SS, 2006, CELL, V127, P759, DOI 10.1016/j.cell.2006.10.035
   Mumby M, 2007, CELL, V130, P21, DOI 10.1016/j.cell.2007.06.034
   Naetar N, 2014, MOL CELL, V54, P932, DOI 10.1016/j.molcel.2014.04.023
   Neviani P, 2005, CANCER CELL, V8, P355, DOI 10.1016/j.ccr.2005.10.015
   Neviani P, 2007, J CLIN INVEST, V117, P2408, DOI 10.1172/JCI31095
   Neviani P, 2013, J CLIN INVEST, V123, P4144, DOI 10.1172/JCI68951
   Niemela M, 2012, ONCOGENE, V31, P4266, DOI 10.1038/onc.2011.599
   Oaks JJ, 2013, BLOOD, V122, P1923, DOI 10.1182/blood-2013-03-492181
   Ofran Y, 2012, CURR OPIN HEMATOL, V19, P89, DOI 10.1097/MOH.0b013e32834ff4e1
   Perot G, 2014, PLOS ONE, V9, DOI 10.1371/journal.pone.0087170
   Perrotti D, 2013, LANCET ONCOL, V14, pE229, DOI 10.1016/S1470-2045(12)70558-2
   Perrotti D, 2010, J CLIN INVEST, V120, P2254, DOI 10.1172/JCI41246
   Pippa R, 2014, LEUKEMIA, V28, P1915, DOI 10.1038/leu.2014.141
   Price NE, 2000, BIOCHEMISTRY-US, V39, P11312, DOI 10.1021/bi0008478
   Ramaswamy K, 2015, FRONT ONCOL, V5, DOI 10.3389/fonc.2015.00016
   Roberts KG, 2010, CANCER RES, V70, P5438, DOI 10.1158/0008-5472.CAN-09-2544
   Rorick AM, 2007, DEV BIOL, V302, P477, DOI 10.1016/j.ydbio.2006.10.011
   Rowe Jacob M, 2009, Hematology Am Soc Hematol Educ Program, P396, DOI 10.1182/asheducation-2009.1.396
   Ruediger R, 2001, ONCOGENE, V20, P1892, DOI 10.1038/sj.onc.1204279
   Ruediger R, 2001, ONCOGENE, V20, P10, DOI 10.1038/sj.onc.1204059
   Ruvolo PP, 2011, LEUKEMIA, V25, P1711, DOI 10.1038/leu.2011.146
   Ruvolo PP, 2015, FRONT ONCOL, V5, DOI 10.3389/fonc.2015.00043
   Ruvolo PP, 2014, BBA-MOL CELL RES, V1843, P1969, DOI 10.1016/j.bbamcr.2014.05.006
   Ruvolo VR, 2008, J BIOL CHEM, V283, P35474, DOI 10.1074/jbc.M800951200
   Sablina AA, 2007, CELL, V129, P969, DOI 10.1016/j.cell.2007.03.047
   Sablina AA, 2010, CANCER RES, V70, P10474, DOI 10.1158/0008-5472.CAN-10-2855
   Saddoughi SA, 2013, EMBO MOL MED, V5, P105, DOI 10.1002/emmm.201201283
   Saito S, 2004, INT J CANCER, V111, P501, DOI 10.1002/ijc.20296
   Schonthal AH, 2001, CANCER LETT, V170, P1, DOI 10.1016/S0304-3835(01)00561-4
   Seeling JM, 1999, SCIENCE, V283, P2089, DOI 10.1126/science.283.5410.2089
   Seo SB, 2001, CELL, V104, P119, DOI 10.1016/S0092-8674(01)00196-9
   Seshacharyulu P, 2013, CANCER LETT, V335, P9, DOI 10.1016/j.canlet.2013.02.036
   Seval GC, 2015, J CLIN MED, V4, P441, DOI 10.3390/jcm4030441
   Shah MV, 2008, BLOOD, V112, P770, DOI 10.1182/blood-2007-11-121871
   Shouse GP, 2011, ONCOGENE, V30, P3755, DOI 10.1038/onc.2011.95
   Shouse GP, 2008, MOL CELL BIOL, V28, P448, DOI 10.1128/MCB.00983-07
   Switzer CH, 2011, ONCOGENE, V30, P2504, DOI 10.1038/onc.2010.622
   ten Klooster JP, 2007, EMBO J, V26, P336, DOI 10.1038/sj.emboj.7601518
   Trotta R, 2007, J EXP MED, V204, P2397, DOI 10.1084/jem.20070419
   Trotta R, 2011, BLOOD, V117, P2378, DOI 10.1182/blood-2010-05-285130
   Turowski P, 1999, MOL BIOL CELL, V10, P1997, DOI 10.1091/mbc.10.6.1997
   Vasudevan NT, 2011, MOL CELL, V41, P636, DOI 10.1016/j.molcel.2011.02.025
   Wang J, 2011, INT J LAB HEMATOL, V33, P290, DOI 10.1111/j.1751-553X.2010.01288.x
   Wang P, 2014, METHODS MOL BIOL, V1170, P99, DOI 10.1007/978-1-4939-0888-2_6
   Wang SS, 1998, SCIENCE, V282, P284, DOI 10.1126/science.282.5387.284
   Westermarck J, 2008, TRENDS MOL MED, V14, P152, DOI 10.1016/j.molmed.2008.02.001
   Wong MH, 2014, CANCER SCI, V105, P1526, DOI 10.1111/cas.12541
   Xu Z, 2000, MOL CELL BIOL, V20, P5285, DOI 10.1128/MCB.20.14.5285-5299.2000
   Xue YJ, 2013, MED ONCOL, V30, DOI 10.1007/s12032-012-0406-6
   Yan LJ, 2010, MOL CELL, V37, P633, DOI 10.1016/j.molcel.2010.01.031
   Yang J, 2003, DEVELOPMENT, V130, P5569, DOI 10.1242/dev.00762
   Yang Y, 2012, J CELL BIOCHEM, V113, P1314, DOI 10.1002/jcb.24003
   Yohe S, 2015, J CLIN MED, V4, P460, DOI 10.3390/jcm4030460
   Yu G, 2013, NEUROBIOL AGING, V34, P1748, DOI 10.1016/j.neurobiolaging.2012.12.025
   Zwaenepoel K, 2010, FASEB J, V24, P538, DOI 10.1096/fj.09-140228
NR 118
TC 30
Z9 31
U1 0
U2 14
PU FRONTIERS MEDIA SA
PI LAUSANNE
PA AVENUE DU TRIBUNAL FEDERAL 34, LAUSANNE, CH-1015, SWITZERLAND
SN 2234-943X
J9 FRONT ONCOL
JI Front. Oncol.
PD APR 6
PY 2016
VL 6
AR 78
DI 10.3389/fonc.2016.00078
PG 11
WC Oncology
WE Science Citation Index Expanded (SCI-EXPANDED)
SC Oncology
GA DI3WP
UT WOS:000373431200001
PM 27092295
OA Green Published, gold
DA 2022-04-10
ER

PT J
AU Costanzo, A
   Pediconi, N
   Narcisi, A
   Guerrieri, F
   Belloni, L
   Fausti, F
   Botti, E
   Levrero, M
AF Costanzo, Antonio
   Pediconi, Natalia
   Narcisi, Alessandra
   Guerrieri, Francesca
   Belloni, Laura
   Fausti, Francesca
   Botti, Elisabetta
   Levrero, Massimo
TI TP63 and TP73 in cancer, an unresolved "family" puzzle of complexity,
   redundancy and hierarchy
SO FEBS LETTERS
LA English
DT Review
DE TP53; TP63; TP73; Development; Tumor suppressors
ID YES-ASSOCIATED PROTEIN; AUTOREGULATORY FEEDBACK LOOP; TUMOR-SUPPRESSOR
   FUNCTIONS; SQUAMOUS-CELL CARCINOMAS; APOPTOTIC TARGET GENES;
   B-KINASE-ALPHA; dna damage; P53 FAMILY; IKK-ALPHA; C-ABL
AB TP53 belongs to a small gene family that includes, in mammals, two additional paralogs, TP63 and TP73. The p63 and p73 proteins are structurally and functionally similar to p53 and their activity as transcription factor is regulated by a wide repertoire of shared and unique post-translational modification and interactions with regulatory cofactors. p63 and p73 have important functions in embryonic development and differentiation but are also involved in tumor suppression. The biology of p63 and p73 is complex since both TP63 and TP73 genes are transcribed into a variety of different isoforms that give rise to proteins with antagonistic properties, the TA-isoforms that act as tumor-suppressors and DN-isoforms that behave as proto-oncogenes. The p53 family as a whole behaves as a signaling "network" that integrates developmental, metabolic and stress signals to control cell metabolism, differentiation, longevity, proliferation and death. Despite the progress of our knowledge, the unresolved puzzle of complexity, redundancy and hierarchy in the p53 family continues to represent a formidable challenge. (C) 2014 Published by Elsevier B.V. on behalf of the Federation of European Biochemical Societies.
C1 [Costanzo, Antonio; Narcisi, Alessandra; Fausti, Francesca; Botti, Elisabetta] Univ Roma La Sapienza, Dermatol Unit, Dept Neurosci Mental Hlth & Sensory Organs NESMOS, Rome, Italy.
   [Pediconi, Natalia] Univ Roma La Sapienza, Mol Oncol Lab, Dept Mol Med, Rome, Italy.
   [Pediconi, Natalia; Guerrieri, Francesca; Belloni, Laura; Levrero, Massimo] IIT Sapienza, Ctr Life Nanosci CNLS, Rome, Italy.
   [Guerrieri, Francesca; Belloni, Laura; Levrero, Massimo] Univ Roma La Sapienza, Gene Express Lab, Dept Internal Med DMISM, Rome, Italy.
RP Levrero, M (corresponding author), Univ Roma La Sapienza, Gene Express Lab, Dept Internal Med DMISM, Rome, Italy.
EM massimo.levrero@uniroma1.it
RI guerrieri, francesca/G-3908-2013; fausti, francesca/AAP-2247-2021;
   Belloni, Laura/S-1432-2019; Guerrieri, Francesca/K-5504-2016; Levrero,
   Massimo/G-5680-2016
OI Guerrieri, Francesca/0000-0003-2751-6050; Costanzo,
   Antonio/0000-0001-9697-2557; Levrero, Massimo/0000-0002-4978-0875;
   Guerrieri, Francesca/0000-0002-2021-4394
CR Agami R, 1999, NATURE, V399, P809
   Amelio I, 2013, ONCOGENE
   Asher G, 2002, P NATL ACAD SCI USA, V99, P13125, DOI 10.1073/pnas.202480499
   Bagchi A, 2008, CANCER RES, V68, P2551, DOI 10.1158/0008-5472.CAN-07-2095
   Baskaran R, 1997, NATURE, V387, P516, DOI 10.1038/387516a0
   Basu S, 2003, MOL CELL, V11, P11, DOI 10.1016/S1097-2765(02)00776-1
   Beaudry VG, 2009, AM J MED GENET A, V149A, P1952, DOI 10.1002/ajmg.a.32760
   Becker K, 2006, INT J ONCOL, V29, P889
   Beitzinger M, 2008, EMBO J, V27, P792, DOI 10.1038/emboj.2008.13
   Bensaad K, 2006, CELL, V126, P107, DOI 10.1016/j.cell.2006.05.036
   Bergamaschi D, 2004, MOL CELL BIOL, V24, P1341, DOI 10.1128/MCB.24.3.1341-1350.2004
   Bergamaschi D, 2003, CANCER CELL, V3, P387, DOI 10.1016/S1535-6108(03)00079-5
   Bergamaschi D, 2006, NAT GENET, V38, P1133, DOI 10.1038/ng1879
   Botti E, 2011, P NATL ACAD SCI USA, V108, P13710, DOI 10.1073/pnas.1110931108
   Broz DK, 2013, GENE DEV, V27, P1016, DOI 10.1101/gad.212282.112
   Buhlmann S, 2008, BBA-REV CANCER, V1785, P207, DOI 10.1016/j.bbcan.2008.01.002
   Cam H, 2006, CANCER CELL, V10, P281, DOI 10.1016/j.ccr.2006.08.024
   Cantor JR, 2012, CANCER DISCOV, V2, P881, DOI 10.1158/2159-8290.CD-12-0345
   Casciano I, 2002, CELL DEATH DIFFER, V9, P246, DOI 10.1038/sj.cdd.4400993
   Castillo J, 2009, GASTROENTEROLOGY, V137, P1805, DOI 10.1053/j.gastro.2009.07.065
   Cheung EC, 2013, DEV CELL, V25, P463, DOI 10.1016/j.devcel.2013.05.001
   Chikh A, 2011, EMBO J, V30, P4261, DOI 10.1038/emboj.2011.302
   Concin N, 2004, CANCER RES, V64, P2449, DOI 10.1158/0008-5472.CAN-03-1060
   Corn PG, 1999, CANCER RES, V59, P3352
   Costanzo A, 2002, MOL CELL, V9, P175, DOI 10.1016/S1097-2765(02)00431-8
   Davison TS, 1999, J BIOL CHEM, V274, P18709, DOI 10.1074/jbc.274.26.18709
   De Laurenzi V, 1999, CELL DEATH DIFFER, V6, P389, DOI 10.1038/sj.cdd.4400521
   De Laurenzi V, 1998, J EXP MED, V188, P1763, DOI 10.1084/jem.188.9.1763
   Descargues P, 2008, EMBO J, V27, P2639, DOI 10.1038/emboj.2008.196
   Descargues P, 2008, P NATL ACAD SCI USA, V105, P2487, DOI 10.1073/pnas.0712044105
   Di Costanzo A, 2009, CELL CYCLE, V8, P1185, DOI 10.4161/cc.8.8.8202
   Dobbelstein M, 1999, ONCOGENE, V18, P2101, DOI 10.1038/sj.onc.1202512
   Du WJ, 2013, NAT CELL BIOL, V15, P991, DOI 10.1038/ncb2789
   Dulloo I, 2010, P NATL ACAD SCI USA, V107, P4902, DOI 10.1073/pnas.0906782107
   Dumont P, 2003, NAT GENET, V33, P357, DOI 10.1038/ng1093
   Flores ER, 2002, NATURE, V416, P560, DOI 10.1038/416560a
   Flores ER, 2005, CANCER CELL, V7, P363, DOI 10.1016/j.ccr.2005.02.019
   Fontemaggi G, 2002, J BIOL CHEM, V277, P43359, DOI 10.1074/jbc.M205573200
   Fontemaggi G, 2001, MOL CELL BIOL, V21, P8461, DOI 10.1128/MCB.21.24.8461-8470.2001
   Fulco M, 2003, J BIOL CHEM, V278, P49196, DOI 10.1074/jbc.M304921200
   Furuya K, 2007, J BIOL CHEM, V282, P18365, DOI 10.1074/jbc.M610522200
   Galli F, 2010, J CELL SCI, V123, P2423, DOI 10.1242/jcs.061010
   Giacobbe A, 2013, CELL CYCLE, V12, P1395, DOI 10.4161/cc.24478
   Gong JG, 1999, NATURE, V399, P806
   Gonzalez S, 2003, MOL CELL BIOL, V23, P8161, DOI 10.1128/MCB.23.22.8161-8171.2003
   Griesmann H, 2009, INT J CANCER, V124, P502, DOI 10.1002/ijc.23978
   Grob TJ, 2001, CELL DEATH DIFFER, V8, P1213, DOI 10.1038/sj.cdd.4400962
   Guan M, 2005, J CLIN PATHOL, V58, P1175, DOI 10.1136/jcp.2005.026955
   Guerrini L, 2011, J BIOMED BIOTECHNOL, DOI 10.1155/2011/864904
   Guo XC, 2009, NAT CELL BIOL, V11, P1451, DOI 10.1038/ncb1988
   Harms K, 2004, CELL MOL LIFE SCI, V61, P822, DOI 10.1007/s00018-003-3304-4
   He Z, 2013, CELL DEATH DIFFER, V20, P1415, DOI 10.1038/cdd.2013.104
   Hearnes JM, 2005, MOL CELL BIOL, V25, P10148, DOI 10.1128/MCB.25.22.10148-10158.2005
   Holembowski L, 2014, J CELL BIOL, V204, P1173, DOI 10.1083/jcb.201306066
   Hosoda M, 2005, ONCOGENE, V24, P7156, DOI 10.1038/sj.onc.1208872
   Hu WW, 2010, P NATL ACAD SCI USA, V107, P7455, DOI 10.1073/pnas.1001006107
   Hu YL, 2001, NATURE, V410, P710, DOI 10.1038/35070605
   Inoue S, 2014, P NATL ACAD SCI USA, V111, P1843, DOI 10.1073/pnas.1323416111
   Irwin M, 2000, NATURE, V407, P645, DOI 10.1038/35036614
   Irwin MS, 2003, CANCER CELL, V3, P403, DOI 10.1016/S1535-6108(03)00078-3
   Irwin MS, 2001, APOPTOSIS, V6, P17, DOI 10.1023/A:1009663809458
   Ishimoto O, 2002, CANCER RES, V62, P636
   Jiang P, 2013, CELL CYCLE, V12, P3720, DOI 10.4161/cc.27267
   Jiang P, 2013, NATURE, V493, P689, DOI 10.1038/nature11776
   Jiang P, 2011, NAT CELL BIOL, V13, P310, DOI 10.1038/ncb2172
   Jones EV, 2007, BIOCHEM J, V405, P617, DOI 10.1042/BJ20061778
   Jung YS, 2013, J INVEST DERMATOL, V133, P1178, DOI 10.1038/jid.2012.466
   Kaghad M, 1997, CELL, V90, P809, DOI 10.1016/S0092-8674(00)80540-1
   Kartasheva NN, 2003, ONCOGENE, V22, P8246, DOI 10.1038/sj.onc.1207138
   Kartasheva NN, 2002, ONCOGENE, V21, P4715, DOI 10.1038/sj.onc.1205584
   Kawano S, 1999, BLOOD, V94, P1113
   Keyes WM, 2006, P NATL ACAD SCI USA, V103, P8435, DOI 10.1073/pnas.0602477103
   Keyes WM, 2005, GENE DEV, V19, P1986, DOI 10.1101/gad.342305
   King KE, 2003, ONCOGENE, V22, P3635, DOI 10.1038/sj.onc.1206536
   Kontaki H, 2010, MOL CELL, V39, P152, DOI 10.1016/j.molcel.2010.06.006
   Koster MI, 2007, P NATL ACAD SCI USA, V104, P3255, DOI 10.1073/pnas.0611376104
   Koster MI, 2004, GENE DEV, V18, P126, DOI 10.1101/gad.1165104
   Lanza M, 2006, CELL CYCLE, V5, P1996, DOI 10.4161/cc.5.17.3188
   Lau CPY, 2013, INT J ONCOL, V42, P437, DOI 10.3892/ijo.2012.1727
   Laurikkala J, 2006, DEVELOPMENT, V133, P1553, DOI 10.1242/dev.02325
   Lazzari C, 2011, ONCOGENE, V30, P4802, DOI 10.1038/onc.2011.182
   Lefkimmiatis K, 2009, CANCER RES, V69, P8563, DOI 10.1158/0008-5472.CAN-09-0259
   Leong CO, 2007, J CLIN INVEST, V117, P1370, DOI 10.1172/JCI30866
   Levrero M, 2000, J CELL SCI, V113, P1661
   Levy D, 2007, CELL DEATH DIFFER, V14, P743, DOI 10.1038/sj.cdd.4402063
   Li C, 2013, CELL DEATH DIS, V4, DOI 10.1038/cddis.2013.468
   Liu BG, 2006, P NATL ACAD SCI USA, V103, P17202, DOI 10.1073/pnas.0604481103
   Lunghi P, 2009, CLIN CANCER RES, V15, P6495, DOI 10.1158/1078-0432.CCR-09-1229
   Maddocks ODK, 2011, J MOL MED, V89, P237, DOI 10.1007/s00109-011-0735-5
   Mantovani F, 2004, MOL CELL, V14, P625, DOI 10.1016/j.molcel.2004.05.007
   Marabese M, 2003, NUCLEIC ACIDS RES, V31, P6624, DOI 10.1093/nar/gkg869
   Marin MC, 2000, NAT GENET, V25, P47, DOI 10.1038/75586
   Marinari B, 2008, P NATL ACAD SCI USA, V105, P17091, DOI 10.1073/pnas.0809288105
   Marinari B, 2009, J INVEST DERMATOL, V129, P60, DOI 10.1038/jid.2008.202
   McGrath JA, 2001, HUM MOL GENET, V10, P221, DOI 10.1093/hmg/10.3.221
   Medawar A, 2008, PLOS ONE, V3, DOI 10.1371/journal.pone.0003441
   Melino G, 2002, NAT REV CANCER, V2, P605, DOI 10.1038/nrc861
   Merlo P, 2005, J BIOL CHEM, V280, P30354, DOI 10.1074/jbc.M500635200
   Mills AA, 1999, NATURE, V398, P708, DOI 10.1038/19531
   Miyazaki K, 2003, BIOCHEM BIOPH RES CO, V308, P106, DOI 10.1016/S0006-291X(03)01347-0
   Moretti F, 2010, J CLIN INVEST, V120, P1570, DOI 10.1172/JCI40267
   Moretti F, 2009, CELL CYCLE, V8, P1113
   Muller M, 2005, CELL DEATH DIFFER, V12, P1564, DOI 10.1038/sj.cdd.4401774
   Murray-Zmijewski F, 2006, CELL DEATH DIFFER, V13, P962, DOI 10.1038/sj.cdd.4401914
   Nakagawa T, 2002, MOL CELL BIOL, V22, P2575, DOI 10.1128/MCB.22.8.2575-2585.2002
   Nemajerova A, 2010, J CLIN INVEST, V120, P2070, DOI 10.1172/JCI40331
   Nguyen BC, 2006, GENE DEV, V20, P1028, DOI 10.1101/gad.1406006
   Ozaki T, 2009, BIOCHEM BIOPH RES CO, V386, P207, DOI 10.1016/j.bbrc.2009.06.035
   Papoutsaki M, 2005, ONCOGENE, V24, P6970, DOI 10.1038/sj.onc.1208835
   Park E, 2013, MOL CELL, V50, P908, DOI 10.1016/j.molcel.2013.05.017
   Patel S, 2008, NUCLEIC ACIDS RES, V36, P5139, DOI 10.1093/nar/gkn490
   Pediconi N, 2003, NAT CELL BIOL, V5, P552, DOI 10.1038/ncb998
   Pediconi N, 2009, MOL CELL BIOL, V29, P1989, DOI 10.1128/MCB.00552-08
   Peschiaroli A, 2009, ONCOGENE, V28, P3157, DOI 10.1038/onc.2009.177
   Petrenko O, 2003, MOL CELL BIOL, V23, P5540, DOI 10.1128/MCB.23.16.5540-5555.2003
   Ramsey MR, 2013, J CLIN INVEST, V123, P3525, DOI 10.1172/JCI68899
   Ratovitski EA, 2013, FEBS LETT, V587, P3581, DOI 10.1016/j.febslet.2013.09.023
   Ren J, 2002, J BIOL CHEM, V277, P33758, DOI 10.1074/jbc.M110667200
   Restelli M., 2014, HUM MOL GENET
   Restivo G, 2011, EMBO J, V30, P4571, DOI 10.1038/emboj.2011.325
   Rinne T, 2006, AM J MED GENET A, V140A, P1396, DOI 10.1002/ajmg.a.31271
   Robinson RA, 2008, STRUCTURE, V16, P259, DOI 10.1016/j.str.2007.11.012
   Rocco JW, 2006, CANCER CELL, V9, P45, DOI 10.1016/j.ccr.2005.12.013
   Romano RA, 2012, DEVELOPMENT, V139, P772, DOI 10.1242/dev.071191
   Rossi M, 2005, EMBO J, V24, P836, DOI 10.1038/sj.emboj.7600444
   Rossi M, 2006, P NATL ACAD SCI USA, V103, P12753, DOI 10.1073/pnas.0603449103
   Rufini A, 2012, GENE DEV, V26, P2009, DOI 10.1101/gad.197640.112
   Sanchez-Prieto R, 2002, ONCOGENE, V21, P974, DOI 10.1038/sj.onc.1205134
   Sauer M, 2008, NUCLEIC ACIDS RES, V36, P1900, DOI 10.1093/nar/gkn044
   Sayan BS, 2010, P NATL ACAD SCI USA, V107, P12877, DOI 10.1073/pnas.0911828107
   Sbisa E, 2006, CELL CYCLE, V5, P205, DOI 10.4161/cc.5.2.2361
   Seelan RS, 2002, NEOPLASIA, V4, P195, DOI 10.1038/sj.neo.7900237
   Sen T., 2010, CELL CYCLE, V9, P24
   Senoo M, 2007, CELL, V129, P523, DOI 10.1016/j.cell.2007.02.045
   Sil AK, 2004, NATURE, V428, P660, DOI 10.1038/nature02421
   Son J, 2013, NATURE, V496, P101, DOI 10.1038/nature12040
   Steder M, 2013, CANCER CELL, V24, P512, DOI 10.1016/j.ccr.2013.08.023
   Stiewe T, 2002, CANCER RES, V62, P3598
   Stiewe T, 2004, CLIN CANCER RES, V10, P626, DOI 10.1158/1078-0432.CCR-0153-03
   Stiewe T, 2000, NAT GENET, V26, P464, DOI 10.1038/82617
   Stiewe T, 2003, J BIOL CHEM, V278, P14230, DOI 10.1074/jbc.M300357200
   Stiewe T, 2007, NAT REV CANCER, V7, P165, DOI 10.1038/nrc2072
   Strano S, 2005, MOL CELL, V18, P447, DOI 10.1016/j.molcel.2005.04.008
   Strano S, 2001, J BIOL CHEM, V276, P15164, DOI 10.1074/jbc.M010484200
   Su XH, 2012, CELL METAB, V16, P511, DOI 10.1016/j.cmet.2012.09.006
   Su XH, 2009, CELL STEM CELL, V5, P64, DOI 10.1016/j.stem.2009.04.003
   Suh EK, 2006, NATURE, V444, P624, DOI 10.1038/nature05337
   Surget S, 2014, ONCOtarget THER, V7, P57, DOI 10.2147/OTT.S53876
   Suzuki S, 2010, P NATL ACAD SCI USA, V107, P7461, DOI 10.1073/pnas.1002459107
   Tada M, 2001, CARCINOGENESIS, V22, P515, DOI 10.1093/carcin/22.3.515
   Talos F, 2007, MOL CELL, V27, P647, DOI 10.1016/j.molcel.2007.06.036
   Tannapfel A, 2008, CARCINOGENESIS, V29, P211, DOI 10.1093/carcin/bgm236
   Thomason HA, 2008, DEV BIOL, V321, P273, DOI 10.1016/j.ydbio.2008.06.030
   Thomason HA, 2010, J CLIN INVEST, V120, P1561, DOI 10.1172/JCI40266
   Toh WH, 2008, NUCLEIC ACIDS RES, V36, P4498, DOI 10.1093/nar/gkn414
   Toh WH, 2004, J BIOL CHEM, V279, P44713, DOI 10.1074/jbc.M407672200
   Tomasini R, 2013, CELL DEATH DIFFER, V20, P293, DOI 10.1038/cdd.2012.123
   Tomasini R, 2008, GENE DEV, V22, P2677, DOI 10.1101/gad.1695308
   Tomasini R, 2009, P NATL ACAD SCI USA, V106, P797, DOI 10.1073/pnas.0812096106
   Tuve S, 2004, INT J CANCER, V108, P162, DOI 10.1002/ijc.11552
   Urist M, 2004, GENE DEV, V18, P3041, DOI 10.1101/gad.1221004
   van Bokhoven H, 2002, AM J HUM GENET, V71, P1, DOI 10.1086/341450
   Velletri T, 2013, CELL CYCLE, V12, P3564, DOI 10.4161/cc.26771
   Vossio S, 2002, ONCOGENE, V21, P3796, DOI 10.1038/sj.onc.1205465
   Watson IR, 2006, J BIOL CHEM, V281, P34096, DOI 10.1074/jbc.M603654200
   Westfall MD, 2004, CARCINOGENESIS, V25, P857, DOI 10.1093/carcin/bgh148
   Wilhelm MT, 2010, GENE DEV, V24, P549, DOI 10.1101/gad.1873910
   Wu GJ, 2005, CANCER RES, V65, P758
   Wu S, 2008, BIOCHEM BIOPH RES CO, V365, P75, DOI 10.1016/j.bbrc.2007.10.145
   Yang A, 1999, NATURE, V398, P714, DOI 10.1038/19539
   Yang A, 2000, NATURE, V404, P99, DOI 10.1038/35003607
   Yang AN, 1998, MOL CELL, V2, P305, DOI 10.1016/S1097-2765(00)80275-0
   Yi R, 2008, NATURE, V452, P225, DOI 10.1038/nature06642
   Yoshida K, 2008, ONCOGENE, V27, P1183, DOI 10.1038/sj.onc.1210722
   Yuan ZM, 1999, NATURE, V399, P814, DOI 10.1038/21704
   Zaika AI, 2002, J EXP MED, V196, P765, DOI 10.1084/jem.20020179
   Zeng XY, 1999, MOL CELL BIOL, V19, P3257
NR 177
TC 30
Z9 30
U1 0
U2 21
PU WILEY
PI HOBOKEN
PA 111 RIVER ST, HOBOKEN 07030-5774, NJ USA
SN 1873-3468
J9 FEBS LETT
JI FEBS Lett.
PD AUG 19
PY 2014
VL 588
IS 16
SI SI
BP 2590
EP 2599
DI 10.1016/j.febslet.2014.06.047
PG 10
WC Biochemistry & Molecular Biology; Biophysics; Cell Biology
WE Science Citation Index Expanded (SCI-EXPANDED)
SC Biochemistry & Molecular Biology; Biophysics; Cell Biology
GA AN1BN
UT WOS:000340317800005
PM 24983500
DA 2022-04-10
ER

PT J
AU Chen, Y
   Tian, P
   Liu, Y
AF Chen, Yan
   Tian, Ping
   Liu, Yi
TI P53 and Protein Phosphorylation Regulate the Oncogenic Role of
   Epithelial Cell Transforming 2 (ECT2)
SO MEDICAL SCIENCE MONITOR
LA English
DT Article
DE Neoplasm Invasiveness; Phosphorylation; Stomach Neoplasms; Tumor
   Suppressor Protein p53
ID EXCHANGE FACTOR; POOR-PROGNOSIS; RHO-GTPASES; EXPRESSION; LOCALIZATION;
   ASSOCIATION; THERAPY
AB Background: Gastric cancer (GC) is the second leading cause of cancer-related death worldwide, but little progress has been achieved in the treatment of advanced or metastatic GC. GC is highly heterogeneous and more studies are needed to elucidate the metastatic mechanism. Epithelial cell transforming 2 (ECT2) has been reported to be up-regulated in GC tissues, but its signaling mechanism remain unclear.
   Material/Methods: In this study, we used Western blot analysis to compare the expression level of ECT2 in 2 GC cell lines: MKN1 and MKN45. Mutagenesis and transfections were conducted to investigate the oncogenic mechanism of ECT2 in GC cells.
   Results: ECT2 was expressed at higher levels in MKN1 than in MKN45. Immunoblotting results showed that MKN1 expression was suppressed by p53-WT but was enhanced by p53-mutant. In addition, in vitro experiments showed that ECT2 positively regulated the proliferation and invasion of GC cells. To better explore the mechanism of ECT2 in promoting GC progression, we introduced site-directed mutants of ECT2, and found that the phosphor-mimic mutant T359D enhanced its oncogenic activity. In contrast, activation of RhoA was inhibited in cells transfected with ECT2 phosphor-deficient mutant T359A. We found that the epithelial cell biomarker E-cadherin was down-regulated by ECT2-T359D, highlighting the role of phosphorylation in regulating epithelial-mesenchymal transition.
   Conclusions: Our results identified p53 as a novel up-stream signaling molecule of ECT2 in GC cells, and the post-translational modification of ECT2 play important roles in regulating cancer development and progression.
C1 [Chen, Yan; Tian, Ping] Yidu Cent Hosp Weifang, Dept Gastroenterol, Weifang, Shandong, Peoples R China.
   [Liu, Yi] Shandong Univ, Qilu Hosp, Dept Gen Surg, Jinan, Shandong, Peoples R China.
RP Liu, Y (corresponding author), Shandong Univ, Qilu Hosp, Dept Gen Surg, Jinan, Shandong, Peoples R China.
EM naxnn333@163.com
CR Cook Danielle R, 2011, Genes Cancer, V2, P932, DOI 10.1177/1947601912437035
   Fields AP, 2010, ADV ENZYME REGUL, V50, P190, DOI 10.1016/j.advenzreg.2009.10.010
   Guo ZH, 2017, MED ONCOL, V34, DOI 10.1007/s12032-016-0872-3
   Hara T, 2006, ONCOGENE, V25, P566, DOI 10.1038/sj.onc.1209078
   Hartgrink HH, 2009, LANCET, V374, P477, DOI 10.1016/S0140-6736(09)60617-6
   Huff Lauren P, 2013, Genes Cancer, V4, P460, DOI 10.1177/1947601913514851
   Jemal A, 2011, CA-CANCER J CLIN, V61, P134, DOI [10.3322/caac.20115, 10.3322/caac.20107]
   Jin Y, 2014, INT J CLIN EXP PATHO, V7, P8724
   Justilien V, 2011, J BIOL CHEM, V286, P8149, DOI 10.1074/jbc.M110.196113
   Kim HJ, 2002, SEMIN RADIAT ONCOL, V12, P162, DOI 10.1053/srao.2002.30818
   Kim JE, 2005, J BIOL CHEM, V280, P5733, DOI 10.1074/jbc.M409298200
   Kotynkova K, 2016, CELL REP, V17, P2672, DOI 10.1016/j.celrep.2016.11.029
   LAMARCHE N, 1994, TRENDS GENET, V10, P436, DOI 10.1016/0168-9525(94)90114-7
   Lim L, 2005, J CLIN ONCOL, V23, P6220, DOI 10.1200/JCO.2005.11.593
   Liu HD, 2016, ONCOTARGET, V7, P81223, DOI 10.18632/oncotarget.13219
   Luo Y, 2015, BIOMED PHARMACOTHER, V73, P135, DOI 10.1016/j.biopha.2015.06.007
   Matthews HK, 2012, DEV CELL, V23, P371, DOI 10.1016/j.devcel.2012.06.003
   Moon SY, 2003, TRENDS CELL BIOL, V13, P13, DOI 10.1016/S0962-8924(02)00004-1
   Niiya F, 2006, ONCOGENE, V25, P827, DOI 10.1038/sj.onc.1209124
   Olofsson B, 1999, CELL SIGNAL, V11, P545, DOI 10.1016/S0898-6568(98)00063-1
   Olsen JV, 2010, SCI SIGNAL, V3, DOI 10.1126/scisignal.2000475
   Pan C, 2013, SCI REP-UK, V3, DOI 10.1038/srep02333
   Parkin DM, 2005, CA-CANCER J CLIN, V55, P74, DOI 10.3322/canjclin.55.2.74
   Reiter LT, 2006, HUM MOL GENET, V15, P2825, DOI 10.1093/hmg/ddl225
   Saito S, 2004, J BIOL CHEM, V279, P7169, DOI 10.1074/jbc.M306725200
   Scoumanne A, 2006, CANCER RES, V66, P6271, DOI 10.1158/0008-5472.CAN-06-0121
   Tan HY, 2016, EXP THER MED, V12, P2088, DOI 10.3892/etm.2016.3584
   Tatsumoto T, 1999, J CELL BIOL, V147, P921, DOI 10.1083/jcb.147.5.921
   Tsunemitsu Y, 2004, GUT, V53, P554, DOI 10.1136/gut.2003.021683
   Wang HB, 2016, CLIN TRANSL ONCOL, V18, P735, DOI 10.1007/s12094-015-1428-2
   Xiao KH, 2016, METHOD PHARMACOL TOX, P75, DOI 10.1007/978-1-4939-3798-1_5
   Yuce O, 2005, J CELL BIOL, V170, P571, DOI 10.1083/jcb.200501097
   Zheng Y, 2001, TRENDS BIOCHEM SCI, V26, P724, DOI 10.1016/S0968-0004(01)01973-9
NR 33
TC 7
Z9 7
U1 0
U2 7
PU INT SCIENTIFIC INFORMATION, INC
PI MELVILLE
PA 150 BROADHOLLOW RD, STE 114, MELVILLE, NY 11747 USA
SN 1643-3750
J9 MED SCI MONITOR
JI Med. Sci. Monitor
PD JUN 27
PY 2017
VL 23
BP 3154
EP 3160
DI 10.12659/MSM.905388
PG 7
WC Medicine, Research & Experimental
WE Science Citation Index Expanded (SCI-EXPANDED)
SC Research & Experimental Medicine
GA EZ3PL
UT WOS:000404622800002
PM 28654632
OA Green Published, Green Submitted
DA 2022-04-10
ER

PT J
AU Stine, ZE
   Dang, CV
AF Stine, Zachary E.
   Dang, Chi V.
TI Stress eating and tuning out: Cancer cells re-wire metabolism to counter
   stress
SO CRITICAL REVIEWS IN BIOCHEMISTRY AND MOLECULAR BIOLOGY
LA English
DT Review
DE Allosteric; glutamate dehydrogenase; glutaminolysis; glycolysis; PFK1;
   PGAM1; PKM2
ID PYRUVATE-KINASE M2; O-GLCNAC MODIFICATION; GLUTAMATE-DEHYDROGENASE;
   TUMOR-GROWTH; P53-INDUCIBLE REGULATOR; PALMITOYL-COENZYME; SERINE
   SYNTHESIS; STRUCTURAL BASIS; GLUTAMINASE 2; AMINO-ACIDS
AB Cancer cells reprogram metabolism to maintain rapid proliferation under often stressful conditions. Glycolysis and glutaminolysis are two central pathway that fuel cancer metabolism. Allosteric regulation and metabolite driven post-translational modification of key metabolic enzymes allow cancer cells glycolysis and glutaminolysis to respond to changes in nutrient availability and the tumor microenvironment. While increased aerobic glycolysis (the Warburg effect) has been a noted part of cancer metabolism for over 80 years, recent work has shown that the elevated levels of glycolytic intermediates are critical to cancer growth and metabolism due to their ability to feed into the anabolic pathway branching off glycolysis such as the pentose phosphate pathway and serine biosynthesis pathway. The key glycolytic enzymes phosphofructokinase-1 (PFK1), pyruvate kinase (PKM2) and phosphoglycerate mutase 1 (PGAM1) are regulated by upstream and downstream metabolites to balance glycolytic flux with flux through anabolic pathway. Glutamine regulation is tightly controlled by metabolic intermediates that allosterically inhibit and activate glutamate dehydrogenase, which fuels the tricarboxylic acid cycle by converting glutamine derived glutamate to alpha-ketoglutarate. The elucidation of these key allosteric regulatory hubs in cancer metabolism will be essential for understanding and predicting how cancer cells will respond to drugs that target metabolism. Additionally, identification of the structures involved in allosteric regulation will inform the design of anti-metabolism drugs which bypass the off-target effects of substrate mimics. Hence, this review aims to provide an overview of allosteric control of glycolysis and glutaminolysis.
C1 [Stine, Zachary E.; Dang, Chi V.] Univ Penn, Abramson Canc Ctr, Abramson Family Canc Res Inst, Philadelphia, PA 19104 USA.
RP Dang, CV (corresponding author), Univ Penn, Abramson Canc Ctr, Abramson Family Canc Res Inst, 1600 Penn Tower,3400 Spruce St, Philadelphia, PA 19104 USA.
EM dangvchi@exchange.upenn.edu
RI Dang, Chi/Y-3375-2019
OI Dang, Chi/0000-0002-4031-2522
FU NCI/NIHUnited States Department of Health & Human ServicesNational
   Institutes of Health (NIH) - USANIH National Cancer Institute (NCI) [R01
   CA057341]; NATIONAL CANCER INSTITUTEUnited States Department of Health &
   Human ServicesNational Institutes of Health (NIH) - USANIH National
   Cancer Institute (NCI) [R01CA057341, F32CA174148] Funding Source: NIH
   RePORTER
FX The authors report no declarations of interest. This work was supported
   by NCI/NIH grant R01 CA057341.
CR AKERBOOM TPM, 1978, EUR J BIOCHEM, V84, P413, DOI 10.1111/j.1432-1033.1978.tb12182.x
   Anastasiou D, 2012, NAT CHEM BIOL, V8, P839, DOI 10.1038/NCHEMBIO.1060
   Anastasiou D, 2011, SCIENCE, V334, P1278, DOI 10.1126/science.1211485
   ASHIZAWA K, 1991, BIOCHEMISTRY-US, V30, P7105, DOI 10.1021/bi00243a010
   ASHIZAWA K, 1991, J BIOL CHEM, V266, P16842
   Atsumi T, 2002, CANCER RES, V62, P5881
   Bar-Peled L, 2012, CELL, V150, P1196, DOI 10.1016/j.cell.2012.07.032
   Bensaad K, 2006, CELL, V126, P107, DOI 10.1016/j.cell.2006.05.036
   Bluemlein K, 2011, ONCOTARGET, V2, P393
   Bruser A, 2012, J BIOL CHEM, V287, P17546, DOI 10.1074/jbc.M112.347153
   Cassago A, 2012, P NATL ACAD SCI USA, V109, P1092, DOI 10.1073/pnas.1112495109
   Chaneton B, 2012, NATURE, V491, P458, DOI 10.1038/nature11540
   Cheung EC, 2013, DEV CELL, V25, P463, DOI 10.1016/j.devcel.2013.05.001
   Christofk HR, 2008, NATURE, V452, P181, DOI 10.1038/nature06667
   Clem BF, 2013, MOL CANCER THER, V12, P1461, DOI 10.1158/1535-7163.MCT-13-0097
   Corcoran CA, 2006, CANCER BIOL THER, V5, P1610, DOI 10.4161/cbt.5.12.3617
   Cortes-Cros M, 2013, P NATL ACAD SCI USA, V110, P489, DOI 10.1073/pnas.1212780110
   David CJ, 2010, NATURE, V463, P364, DOI 10.1038/nature08697
   DeLaBarre B, 2011, BIOCHEMISTRY-US, V50, P10764, DOI 10.1021/bi201613d
   Duran RV, 2012, MOL CELL, V47, P349, DOI 10.1016/j.molcel.2012.05.043
   ERECINSKA M, 1990, J NEUROCHEM, V54, P1335, DOI 10.1111/j.1471-4159.1990.tb01967.x
   FAHIEN LA, 1981, ARCH BIOCHEM BIOPHYS, V212, P247, DOI 10.1016/0003-9861(81)90364-7
   Ferreras C, 2009, J BIOL CHEM, V284, P9124, DOI 10.1074/jbc.M807737200
   Friday E, 2012, DEHYDROGENASES, P181
   Giacobbe A, 2013, CELL CYCLE, V12, P1395, DOI 10.4161/cc.24478
   Goidts V, 2012, ONCOGENE, V31, P3235, DOI 10.1038/onc.2011.490
   Haigis MC, 2006, CELL, V126, P941, DOI 10.1016/j.cell.2006.06.057
   Han JM, 2012, CELL, V149, P410, DOI 10.1016/j.cell.2012.02.044
   Heiden MGV, 2010, SCIENCE, V329, P1492, DOI 10.1126/science.1188015
   HERS HG, 1982, BIOCHEM J, V206, P1
   Hitosugi T, 2012, CANCER CELL, V22, P585, DOI 10.1016/j.ccr.2012.09.020
   Hitosugi T, 2009, SCI SIGNAL, V2, DOI 10.1126/scisignal.2000431
   Hu WW, 2010, P NATL ACAD SCI USA, V107, P7455, DOI 10.1073/pnas.1001006107
   Jenkins CM, 2011, J BIOL CHEM, V286, DOI 10.1074/jbc.M110.203661
   Jeong SM, 2013, CANCER CELL, V23, P450, DOI 10.1016/j.ccr.2013.02.024
   KAWAGUCHI A, 1976, J BIOL CHEM, V251, P1406
   Keller KE, 2012, SCIENCE, V338, P1069, DOI 10.1126/science.1224409
   Kemp RG, 2002, BIOCHEMISTRY-US, V41, P9426, DOI 10.1021/bi020110d
   Kessler R, 2008, J NEURO-ONCOL, V86, P257, DOI 10.1007/s11060-007-9471-7
   Koppenol WH, 2011, NAT REV CANCER, V11, P325, DOI 10.1038/nrc3038
   Kung C, 2012, CHEM BIOL, V19, P1187, DOI 10.1016/j.chembiol.2012.07.021
   LAI JCK, 1993, RES COMMUN CHEM PATH, V82, P331
   Le A, 2010, P NATL ACAD SCI USA, V107, P2037, DOI 10.1073/pnas.0914433107
   Leite TC, 2011, FEBS LETT, V585, P92, DOI 10.1016/j.febslet.2010.11.009
   Leite TC, 2007, BIOCHEM J, V408, P123, DOI 10.1042/BJ20070687
   Li CH, 2011, J BIOL CHEM, V286, P34164, DOI 10.1074/jbc.M111.268599
   Li M, 2012, ARCH BIOCHEM BIOPHYS, V519, P69, DOI 10.1016/j.abb.2011.10.015
   LIAO SS, 1995, CANCER LETT, V96, P239, DOI 10.1016/0304-3835(95)03948-V
   Locasale JW, 2011, NAT GENET, V43, P869, DOI 10.1038/ng.890
   Luo WB, 2011, CELL, V145, P732, DOI 10.1016/j.cell.2011.03.054
   Lv L, 2011, MOL CELL, V42, P719, DOI 10.1016/j.molcel.2011.04.025
   Mattaini KR, 2012, SCIENCE, V337, P925, DOI 10.1126/science.1227513
   Metallo CM, 2012, NATURE, V481, P380, DOI 10.1038/nature10602
   Minchenko O, 2004, FEBS LETT, V576, P14, DOI 10.1016/j.febslet.2004.08.053
   Mullen AR, 2012, NATURE, V481, P385, DOI 10.1038/nature10642
   Nicklin P, 2009, CELL, V136, P521, DOI 10.1016/j.cell.2008.11.044
   NOGUCHI T, 1986, J BIOL CHEM, V261, P3807
   Okar DO, 2001, TRENDS BIOCHEM SCI, V26, P30, DOI 10.1016/S0968-0004(00)01699-6
   Pinheiro C, 2012, J BIOENERG BIOMEMBR, V44, P127, DOI 10.1007/s10863-012-9428-1
   POORMAN RA, 1984, NATURE, V309, P467, DOI 10.1038/309467a0
   Porter LD, 2002, PHYSIOL GENOMICS, V9, P157, DOI 10.1152/physiolgenomics.00017.2002
   Possemato R, 2011, NATURE, V476, P346, DOI 10.1038/nature10350
   RANDLE PJ, 1963, LANCET, V1, P785
   REINHART GD, 1983, J BIOL CHEM, V258, P827
   Ren FL, 2010, MOL CANCER, V9, DOI 10.1186/1476-4598-9-81
   Ros S, 2012, CANCER DISCOV, V2, P328, DOI 10.1158/2159-8290.CD-11-0234
   Ruiz-Lozano P, 1999, CELL GROWTH DIFFER, V10, P295
   Sakakibara R, 1997, J BIOCHEM-TOKYO, V122, P122
   Shukla K, 2012, J MED CHEM, V55, P10551, DOI 10.1021/jm301191p
   Son HJ, 2012, BMB REP, V45, P707, DOI 10.5483/BMBRep.2012.45.12.156
   Sonveaux P, 2008, J CLIN INVEST, V118, P3930, DOI 10.1172/JCI36843
   Stanley CA, 1998, NEW ENGL J MED, V338, P1352, DOI 10.1056/NEJM199805073381904
   Suzuki S, 2010, P NATL ACAD SCI USA, V107, P7461, DOI 10.1073/pnas.1002459107
   Taylor RP, 2008, J BIOL CHEM, V283, P6050, DOI 10.1074/jbc.M707328200
   Thangavelu K, 2012, P NATL ACAD SCI USA, V109, P7705, DOI 10.1073/pnas.1116573109
   Tomita T, 2011, J BIOL CHEM, V286, P37406, DOI 10.1074/jbc.M111.260265
   Usenik A, 2010, PLOS ONE, V5, DOI 10.1371/journal.pone.0015447
   Uyeda K, 1979, Adv Enzymol Relat Areas Mol Biol, V48, P193
   Wamelink M, 2008, J INHERIT METAB DIS, V31, P703, DOI 10.1007/s10545-008-1015-6
   Wang JB, 2010, CANCER CELL, V18, P207, DOI 10.1016/j.ccr.2010.08.009
   Wanka C, 2012, J BIOL CHEM, V287, P33436, DOI 10.1074/jbc.M112.384578
   Ward PS, 2012, CANCER CELL, V21, P297, DOI 10.1016/j.ccr.2012.02.014
   Wise DR, 2011, P NATL ACAD SCI USA, V108, P19611, DOI 10.1073/pnas.1117773108
   Wise DR, 2010, TRENDS BIOCHEM SCI, V35, P427, DOI 10.1016/j.tibs.2010.05.003
   Wong Nicholas, 2013, Int J Cell Biol, V2013, P242513, DOI 10.1155/2013/242513
   Xiang LS, 2013, BBA-MOL CELL RES, V1833, P2996, DOI 10.1016/j.bbamcr.2013.08.003
   Yang WW, 2012, CELL, V150, P685, DOI 10.1016/j.cell.2012.07.018
   Yang WW, 2011, NATURE, V480, P118, DOI 10.1038/nature10598
   Ye JB, 2012, P NATL ACAD SCI USA, V109, P6904, DOI 10.1073/pnas.1204176109
   Yi W, 2012, SCIENCE, V337, P975, DOI 10.1126/science.1222278
   Yoo H, 2008, J BIOL CHEM, V283, P20621, DOI 10.1074/jbc.M706494200
   Yun SJ, 2012, UROL ONCOL-SEMIN ORI, V30, P893, DOI 10.1016/j.urolonc.2010.08.018
   Zachara NE, 2004, J BIOL CHEM, V279, P30133, DOI 10.1074/jbc.M403773200
   Zoncu R, 2011, SCIENCE, V334, P678, DOI 10.1126/science.1207056
NR 94
TC 26
Z9 27
U1 0
U2 41
PU TAYLOR & FRANCIS LTD
PI ABINGDON
PA 2-4 PARK SQUARE, MILTON PARK, ABINGDON OR14 4RN, OXON, ENGLAND
SN 1040-9238
EI 1549-7798
J9 CRIT REV BIOCHEM MOL
JI Crit. Rev. Biochem. Mol. Biol.
PD NOV-DEC
PY 2013
VL 48
IS 6
BP 609
EP 619
DI 10.3109/10409238.2013.844093
PG 11
WC Biochemistry & Molecular Biology
WE Science Citation Index Expanded (SCI-EXPANDED)
SC Biochemistry & Molecular Biology
GA 258FH
UT WOS:000327444200006
PM 24099138
OA Green Accepted
DA 2022-04-10
ER

PT J
AU Comer, FI
   Hart, GW
AF Comer, FI
   Hart, GW
TI O-GlcNAc and the control of gene expression
SO BIOCHIMICA ET BIOPHYSICA ACTA-GENERAL SUBJECTS
LA English
DT Review
DE O-linked N-acetylglucosamine; N-acetylglucosamine; transcription;
   protein glycosylation
ID RNA-POLYMERASE-II; LINKED N-ACETYLGLUCOSAMINE; MYC TRANSACTIVATION
   DOMAIN; PEPTIDE-CHAIN INITIATION; 67-KDA POLYPEPTIDE P67; EIF-2
   ALPHA-SUBUNIT; C-MYC; PROTEIN-SYNTHESIS; NUCLEAR-PORE; EUKARYOTIC
   TRANSCRIPTION
AB Many eukaryotic proteins contain O-linked N-acetylglucosamine (O-GlcNAc) on their serine and threonine side chain hydroxyls. In contrast to classical cell surface glycosylation, O-GlcNAc occurs on resident nuclear and cytoplasmic proteins. O-GlcNAc exists as a single monosaccharide residue, showing no evidence of further elongation. Like phosphorylation, O-GlcNAc is highly dynamic, transiently modifying proteins. These post-translational modification give rise to functionally distinct subsets of a given protein. Furthermore, all known O-GlcNAc proteins are also phosphoproteins that reversibly form multimeric complexes that are sensitive to the state of phosphorylation. This observation implies that O-GlcNAc may work in concert with phosphorylation to mediate regulated protein interactions. The proteins that bear the O-GlcNAc modification are very diverse, including RNA polymerase II and many of its transcription factor, numerous chromatin-associated proteins, nuclear pore proteins, proto-oncogenes, tumor suppressors and proteins involved in translation. Here, we discuss the functional implications of O-GlcNAc-modifications of proteins involved in various aspects of gene expression, beginning with proteins involved in transcription and ending with proteins involved in regulating protein translation. (C) 1999 Elsevier Science B.V. All rights reserved.
C1 Johns Hopkins Univ, Sch Med, Dept Biol Chem, Baltimore, MD 21205 USA.
RP Hart, GW (corresponding author), Johns Hopkins Univ, Sch Med, Dept Biol Chem, 725 N Wolfe St, Baltimore, MD 21205 USA.
OI Hart, Gerald/0000-0001-7812-4351
CR AMATI B, 1992, NATURE, V359, P423, DOI 10.1038/359423a0
   CHAKRABORTY A, 1994, BIOCHEMISTRY-US, V33, P6700, DOI 10.1021/bi00187a041
   CHOU TY, 1995, P NATL ACAD SCI USA, V92, P4417, DOI 10.1073/pnas.92.10.4417
   CHOU TY, 1995, J BIOL CHEM, V270, P18961, DOI 10.1074/jbc.270.32.18961
   CORDEN JL, 1990, TRENDS BIOCHEM SCI, V15, P383, DOI 10.1016/0968-0004(90)90236-5
   COURTOIS G, 1987, SCIENCE, V238, P688, DOI 10.1126/science.3499668
   DAHMUS ME, 1995, BBA-GENE STRUCT EXPR, V1261, P171, DOI 10.1016/0167-4781(94)00233-S
   DATTA B, 1989, J BIOL CHEM, V264, P20620
   DATTA B, 1988, P NATL ACAD SCI USA, V85, P3324, DOI 10.1073/pnas.85.10.3324
   Davie JR, 1998, CURR OPIN GENET DEV, V8, P173, DOI 10.1016/S0959-437X(98)80138-X
   DONG DLY, 1994, J BIOL CHEM, V269, P19321
   FANNING E, 1992, ANNU REV BIOCHEM, V61, P55
   FEATHERSTONE C, 1988, J CELL BIOL, V107, P1289, DOI 10.1083/jcb.107.4.1289
   FINLAY DR, 1990, CELL, V60, P17, DOI 10.1016/0092-8674(90)90712-N
   FINLAY DR, 1987, J CELL BIOL, V104, P189, DOI 10.1083/jcb.104.2.189
   FRIEND S, 1994, SCIENCE, V265, P334, DOI 10.1126/science.8023155
   Goldfarb D, 1991, Trends Cell Biol, V1, P20, DOI 10.1016/0962-8924(91)90065-H
   Greis KD, 1996, ANAL BIOCHEM, V234, P38, DOI 10.1006/abio.1996.0047
   Gupta N, 1996, INDIAN J BIOCHEM BIO, V33, P239
   HALTIWANGER RS, 1992, J BIOL CHEM, V267, P9005
   Hampsey M, 1998, MICROBIOL MOL BIOL R, V62, P465, DOI 10.1128/MMBR.62.2.465-503.1998
   Han I, 1997, MOL CELL BIOL, V17, P2550, DOI 10.1128/MCB.17.5.2550
   HANOVER JA, 1992, FASEB J, V6, P2288, DOI 10.1096/fasebj.6.6.1312045
   Hart GW, 1997, ANNU REV BIOCHEM, V66, P315, DOI 10.1146/annurev.biochem.66.1.315
   HOANG AT, 1995, MOL CELL BIOL, V15, P4031
   Holstege FCP, 1999, P NATL ACAD SCI USA, V96, P2, DOI 10.1073/pnas.96.1.2
   HOLT GD, 1987, J CELL BIOL, V104, P1157, DOI 10.1083/jcb.104.5.1157
   HOLT GD, 1986, J BIOL CHEM, V261, P8049
   JACKSON SP, 1988, CELL, V55, P125, DOI 10.1016/0092-8674(88)90015-3
   Jiang MS, 1997, J BIOL CHEM, V272, P2421
   Kadonaga JT, 1998, CELL, V92, P307, DOI 10.1016/S0092-8674(00)80924-1
   KEARSE KP, 1991, P NATL ACAD SCI USA, V88, P1701, DOI 10.1073/pnas.88.5.1701
   KELLY WG, 1989, CELL, V57, P243, DOI 10.1016/0092-8674(89)90962-8
   KELLY WG, 1993, J BIOL CHEM, V268, P10416
   KELLY WG, 1988, IN PRESS J CELL BIOL
   KREPPEL LK, 1996, FASEB J, V10, pA1120
   KREPPEL LK, UNPUB MOL CELLULAR G
   KU NO, 1994, EXP CELL RES, V211, P24, DOI 10.1006/excr.1994.1054
   LICHTSTEINER S, 1989, CELL, V57, P1179, DOI 10.1016/0092-8674(89)90055-X
   Lubas WA, 1997, J BIOL CHEM, V272, P9316
   Medina L, 1998, GLYCOBIOLOGY, V8, P383, DOI 10.1093/glycob/8.4.383
   Pain VM, 1996, EUR J BIOCHEM, V236, P747, DOI 10.1111/j.1432-1033.1996.00747.x
   PRIVALSKY ML, 1990, J VIROL, V64, P463, DOI 10.1128/JVI.64.1.463-466.1990
   RAY MK, 1992, P NATL ACAD SCI USA, V89, P539, DOI 10.1073/pnas.89.2.539
   REASON AJ, 1992, J BIOL CHEM, V267, P16911
   Rechsteiner M, 1996, TRENDS BIOCHEM SCI, V21, P267, DOI 10.1016/0968-0004(96)10031-1
   Roos MD, 1997, MOL CELL BIOL, V17, P6472, DOI 10.1128/MCB.17.11.6472
   SCHAUFELE F, 1990, J BIOL CHEM, V265, P17189
   SCHMIDTULLRICH R, 1979, BIOCHEM BIOPH RES CO, V88, P887, DOI 10.1016/0006-291X(79)91492-X
   Shaw P, 1996, ONCOGENE, V12, P921
   Shilatifard A, 1998, BIOL CHEM, V379, P27
   Snow DM, 1998, INT REV CYTOL, V181, P43, DOI 10.1016/S0074-7696(08)60416-7
   Steinmetz EJ, 1997, CELL, V89, P491, DOI 10.1016/S0092-8674(00)80230-5
   TORRES CR, 1984, J BIOL CHEM, V259, P3308
   TREISMAN R, 1992, TRENDS BIOCHEM SCI, V17, P423, DOI 10.1016/0968-0004(92)90013-Y
   Tzagarakis-Foster C, 1998, J BIOL CHEM, V273, P10926, DOI 10.1074/jbc.273.18.10926
NR 56
TC 138
Z9 141
U1 0
U2 13
PU ELSEVIER SCIENCE BV
PI AMSTERDAM
PA PO BOX 211, 1000 AE AMSTERDAM, NETHERLANDS
SN 0304-4165
J9 BBA-GEN SUBJECTS
JI Biochim. Biophys. Acta-Gen. Subj.
PD DEC 6
PY 1999
VL 1473
IS 1
BP 161
EP 171
DI 10.1016/S0304-4165(99)00176-2
PG 11
WC Biochemistry & Molecular Biology; Biophysics
WE Science Citation Index Expanded (SCI-EXPANDED)
SC Biochemistry & Molecular Biology; Biophysics
GA 263YV
UT WOS:000084153600013
PM 10580136
DA 2022-04-10
ER

PT J
AU Yang, QM
   Zhang, YQ
   Cui, H
   Chen, LM
   Zhao, Y
   Lin, Y
   Zhang, MH
   Xie, L
AF Yang, Qingmin
   Zhang, Yuqi
   Cui, Hui
   Chen, Lanming
   Zhao, Yong
   Lin, Yong
   Zhang, Menghuan
   Xie, Lu
TI dbDEPC 3.0: the database of differentially expressed proteins in human
   cancer with multi-level annotation and drug indication
SO DATABASE-THE JOURNAL OF BIOLOGICAL DATABASES AND CURATION
LA English
DT Article
ID INTEGRATIVE RESOURCE; NETWORKS
AB Proteins are major effectors of biological functions, and differentially expressed proteins (DEPs) are widely reported as biomarkers in pathological mechanism, prognosis prediction as well as treatment targeting in cancer research. High-throughput technology of mass spectrometry (MS) has identified large amounts of DEPs in human cancers. Through mining published researches with detailed experiment information, dbDEPC was the first database aimed to provide a systematic resource for the storage and query of the DEPs generated by MS in cancer research. It was updated to dbDEPC 2.0 in 2012. Here, we provide another updated version of dbDEPC, with improvement of database contents and enhanced web interface. The current version of dbDEPC 3.0 contains 11 669 unique DEPs in 26 different cancer types. Multi-level annotations of DEPs have been firstly introduced this time, including cancer-related peptide amino acid variations, post-translational modification and drug information. Moreover, these multi-level annotations can be displayed in the biological networks, which can benefit integrative analysis. Finally, an online enrichment analysis tool has been developed, to support a KEGG enrichment analysis and to browse the relationship among interested protein list and known DEPs in KEGG pathway. In summary, dbDEPC 3.0 provides a comprehensive resource for accessing integrated and highly annotated DEPs in human cancer.
C1 [Yang, Qingmin; Chen, Lanming; Zhao, Yong] Shanghai Ocean Univ, Coll Food Sci & Technol, Shanghai 201306, Peoples R China.
   [Yang, Qingmin; Zhang, Yuqi; Cui, Hui; Zhang, Menghuan; Xie, Lu] Shanghai Acad Sci & Technol, Shanghai Ctr Bioinformat Technol, Shanghai 201203, Peoples R China.
   [Zhang, Yuqi; Lin, Yong] Univ Shanghai Sci & Technol, Sch Med Instrument & Food Engn, Shanghai 201210, Peoples R China.
   [Cui, Hui] ShanghaiTech Univ, Sch Life Sci & Technol, Shanghai 201210, Peoples R China.
   [Cui, Hui] Univ Chinese Acad Sci, Shanghai Inst Biol Sci, Inst Nutr Sci, Shanghai 200031, Peoples R China.
   [Chen, Lanming; Zhao, Yong] Minist Agr, Lab Qual & Safety Risk Assessment Aquat Prod Stor, Shanghai 201306, Peoples R China.
   [Zhao, Yong] Shanghai Engn Res Ctr Aquat Prod Proc & Preservat, Shanghai 201306, Peoples R China.
RP Zhang, MH; Xie, L (corresponding author), Shanghai Acad Sci & Technol, Shanghai Ctr Bioinformat Technol, Shanghai 201203, Peoples R China.; Lin, Y (corresponding author), Univ Shanghai Sci & Technol, Sch Med Instrument & Food Engn, Shanghai 201210, Peoples R China.
EM yong_lynn@163.com; zhangmenghuan1990@126.com; luxiex2017@outlook.com
OI Cui, Hui/0000-0002-4236-2582
FU National Key Research and Development Program of China [2016YFC0904101];
   National Natural Science Foundation of ChinaNational Natural Science
   Foundation of China (NSFC) [31570831]; National Hi-Tech Program
   [2015AA020101]; Chinese Human Proteome Projects [CNHPP: 2014DFB30020,
   2014DFB30030]
FX This work was supported by National Key Research and Development Program
   of China [2016YFC0904101]; National Natural Science Foundation of China
   [31570831]; National Hi-Tech Program [2015AA020101] and Chinese Human
   Proteome Projects [CNHPP: 2014DFB30020, 2014DFB30030].
CR Apweiler R, 2014, NUCLEIC ACIDS RES, V42, pD191, DOI 10.1093/nar/gkt1140
   Arntzen MO, 2015, PROTEOMICS, V15, P3765, DOI 10.1002/pmic.201500144
   Chen TW, 2017, NAT COMMUN, V8, DOI 10.1038/s41467-017-00493-9
   Chisanga D, 2016, NUCLEIC ACIDS RES, V44, pD969, DOI 10.1093/nar/gkv1097
   Cutts RJ, 2015, NUCLEIC ACIDS RES, V43, pD831, DOI 10.1093/nar/gku984
   Forbes SA, 2015, NUCLEIC ACIDS RES, V43, pD805, DOI 10.1093/nar/gku1075
   Harrold JM, 2013, CLIN PHARMACOL THER, V94, P651, DOI 10.1038/clpt.2013.176
   He Y, 2012, NUCLEIC ACIDS RES, V40, pD964, DOI 10.1093/nar/gkr936
   Huang KY, 2016, NUCLEIC ACIDS RES, V44, pD435, DOI 10.1093/nar/gkv1240
   Kanehisa M, 2012, NUCLEIC ACIDS RES, V40, pD109, DOI 10.1093/nar/gkr988
   Law V, 2014, NUCLEIC ACIDS RES, V42, pD1091, DOI 10.1093/nar/gkt1068
   Li H, 2010, NUCLEIC ACIDS RES, V38, pD658, DOI 10.1093/nar/gkp933
   Li J, 2014, DATABASE-OXFORD, DOI 10.1093/database/bau025
   Smedley D, 2015, NUCLEIC ACIDS RES, V43, pW589, DOI 10.1093/nar/gkv350
   Szklarczyk D, 2015, NUCLEIC ACIDS RES, V43, pD447, DOI 10.1093/nar/gku1003
   Thomas JK, 2014, CANCER BIOL THER, V15, P963, DOI 10.4161/cbt.29188
   Ullah AZD, 2014, NUCLEIC ACIDS RES, V42, pD944, DOI 10.1093/nar/gkt959
   Vizcaino JA, 2016, NUCLEIC ACIDS RES, V44, P11033, DOI 10.1093/nar/gkw880
   Wang C, 2015, PLOS ONE, V10, DOI 10.1371/journal.pone.0142591
   Zhang MH, 2015, J PROTEOME RES, V14, P2745, DOI 10.1021/acs.jproteome.5b00249
NR 20
TC 8
Z9 9
U1 0
U2 6
PU OXFORD UNIV PRESS
PI OXFORD
PA GREAT CLARENDON ST, OXFORD OX2 6DP, ENGLAND
SN 1758-0463
J9 DATABASE-OXFORD
JI Database
PD FEB 22
PY 2018
AR bay015
DI 10.1093/database/bay015
PG 10
WC Mathematical & Computational Biology
WE Science Citation Index Expanded (SCI-EXPANDED)
SC Mathematical & Computational Biology
GA FY9PJ
UT WOS:000427198400001
PM 29688359
OA Green Submitted, Green Published, gold
DA 2022-04-10
ER

PT J
AU Jarvius, M
   Paulsson, J
   Weibrecht, I
   Leuchowius, KJ
   Andersson, AC
   Wahlby, C
   Gullberg, M
   Botling, J
   Sjoblom, T
   Markova, B
   Ostman, A
   Landegren, U
   Soderberg, O
AF Jarvius, Malin
   Paulsson, Janna
   Weibrecht, Irene
   Leuchowius, Karl-Johan
   Andersson, Ann-Catrin
   Wahlby, Carolina
   Gullberg, Mats
   Botling, Johan
   Sjoblom, Tobias
   Markova, Boyka
   Ostman, Arne
   Landegren, Ulf
   Soderberg, Ola
TI In situ detection of phosphorylated platelet-derived growth factor
   receptor beta using a generalized proximity ligation method
SO MOLECULAR & CELLULAR PROTEOMICS
LA English
DT Article
ID PROTEIN-DETECTION; PDGF RECEPTOR; ACTIVATION; ASSAYS
AB Improved methods are needed for in situ characterization of post- translational modifications in cell lines and tissues. For example, it is desirable to monitor the phosphorylation status of individual receptor tyrosine kinases in samples from human tumors treated with inhibitors to evaluate therapeutic responses. Unfortunately the leading methods for observing the dynamics of tissue post- translational modifications in situ, immunohistochemistry and immunofluorescence, exhibit limited sensitivity and selectivity. Proximity ligation assay is a novel method that offers improved selectivity through the requirement of dual recognition and increased sensitivity by including DNA amplification as a component of detection of the target molecule. Here we therefore established a generalized in situ proximity ligation assay to investigate phosphorylation of platelet- derived growth factor receptor beta ( PDGFR beta) in cells stimulated with platelet- derived growth factor BB. Antibodies specific for immunoglobulins from different species, modified by attachment of DNA strands, were used as secondary proximity probes together with a pair of primary antibodies from the corresponding species. Dual recognition of receptors and phosphorylated sites by the primary antibodies in combination with the secondary proximity probes was used to generate circular DNA strands; this was followed by signal amplification by replicating the DNA circles via rolling circle amplification. We detected tyrosine phosphorylated PDGFR beta in human embryonic kidney cells stably overexpressing human influenza hemagglutinin- tagged human PDGFR beta in porcine aortic endothelial cells transfected with the beta- receptor, but not in cells transfected with the alpha- receptor, and also in immortalized human foreskin fibroblasts, BJ hTert, endogenously expressing the PDGFR beta.. We furthermore visualized tyrosine phosphorylated PDGFR beta in tissue sections from fresh frozen human scar tissue undergoing wound healing. The method should be of great value to study signal transduction, screen for effects of pharmacological agents, and enhance the diagnostic potential in histopathology.
C1 Uppsala Univ, Rudbeck Lab, Dept Genet & Pathol, SE-75185 Uppsala, Sweden.
   Canc Ctr Karolinska, Dept Oncol Pathol, SE-17176 Stockholm, Sweden.
   Olink AB, SE-75183 Uppsala, Sweden.
   Uppsala Univ, Ctr Image Anal, SE-75105 Uppsala, Sweden.
   Johannes Gutenberg Univ Mainz, Dept Med 3, D-55131 Mainz, Germany.
RP Soderberg, O (corresponding author), Uppsala Univ, Rudbeck Lab, Dept Genet & Pathol, SE-75185 Uppsala, Sweden.
EM ola.soderberg@genpat.uu.se
RI Söderberg, Ola/O-5130-2017; Landegren, Ulf D/A-8197-2019; Botling,
   Johan/ABA-2586-2020
OI Söderberg, Ola/0000-0003-2883-1925; Wahlby,
   Carolina/0000-0002-4139-7003; Botling, Johan/0000-0003-2226-3517;
   Gullberg, Mats/0000-0002-9955-5668
CR Allalou A, 2007, LECT NOTES COMPUT SC, V4522, P631
   Baner J, 1998, NUCLEIC ACIDS RES, V26, P5073, DOI 10.1093/nar/26.22.5073
   Baselga J, 2006, SCIENCE, V312, P1175, DOI 10.1126/science.1125951
   Bergsten E, 2001, NAT CELL BIOL, V3, P512, DOI 10.1038/35074588
   CLAESSONWELSH L, 1994, J BIOL CHEM, V269, P32023
   Fredriksson S, 2002, NAT BIOTECHNOL, V20, P473, DOI 10.1038/nbt0502-473
   Gullberg M, 2004, P NATL ACAD SCI USA, V101, P8420, DOI 10.1073/pnas.0400552101
   Haj FG, 2002, SCIENCE, V295, P1708, DOI 10.1126/science.1067566
   HART CE, 1988, SCIENCE, V240, P1529, DOI 10.1126/science.2836952
   Heldin CH, 1998, BIOCH BIOPHYS ACTA R, V1378, P79
   Jones SM, 2001, NAT CELL BIOL, V3, P165, DOI 10.1038/35055073
   Lindblad J, 2004, CYTOM PART A, V57A, P22, DOI 10.1002/cyto.a.10107
   Markova B, 2003, BIOCHEMISTRY-US, V42, P2691, DOI 10.1021/bi0265574
   Ostman A, 2004, CYTOKINE GROWTH F R, V15, P275, DOI 10.1016/j.cytogfr.2004.03.002
   Raines EW, 2004, CYTOKINE GROWTH F R, V15, P237, DOI 10.1016/j.cytogfr.2004.03.004
   Rajkumar VS, 2006, AM J PATHOL, V169, P2254, DOI 10.2353/ajpath.2006.060196
   Schallmeiner E, 2007, NAT METHODS, V4, P135, DOI 10.1038/nmeth974
   Seet BT, 2006, NAT REV MOL CELL BIO, V7, P473, DOI 10.1038/nrm1960
   Soderberg O, 2006, NAT METHODS, V3, P995, DOI 10.1038/nmeth947
   Tenev T, 2000, EUR J CELL BIOL, V79, P261, DOI 10.1078/S0171-9335(04)70029-1
NR 20
TC 172
Z9 176
U1 0
U2 34
PU AMER SOC BIOCHEMISTRY MOLECULAR BIOLOGY INC
PI BETHESDA
PA 9650 ROCKVILLE PIKE, BETHESDA, MD 20814-3996 USA
SN 1535-9476
J9 MOL CELL PROTEOMICS
JI Mol. Cell. Proteomics
PD SEP
PY 2007
VL 6
IS 9
BP 1500
EP 1509
DI 10.1074/mcp.M700166-MCP200
PG 10
WC Biochemical Research Methods
WE Science Citation Index Expanded (SCI-EXPANDED)
SC Biochemistry & Molecular Biology
GA 207FO
UT WOS:000249237200004
PM 17565975
OA Green Submitted, hybrid
DA 2022-04-10
ER

PT J
AU Kwok, S
   Partridge, NC
   Srinivasan, N
   Nair, SV
   Selvamurugan, N
AF Kwok, Sukyee
   Partridge, Nicola C.
   Srinivasan, Narasaimhan
   Nair, Shantikumar V.
   Selvamurugan, Nagarajan
TI Mitogen Activated Protein Kinase-Dependent Inhibition of Osteocalcin
   Gene Expression by Transforming Growth Factor-beta 1
SO JOURNAL OF CELLULAR BIOCHEMISTRY
LA English
DT Article
DE TGF-beta; Runx2; OSTEOBLAST; OSTEOCALCIN
ID RAT COLLAGENASE-3 PROMOTER; TRANSCRIPTION FACTOR; TGF-BETA; OSTEOBLAST
   DIFFERENTIATION; signaling pathway; CANCER-CELLS; GROWTH; RUNX2; CBFA1;
   REPRESSION
AB TGF-beta (transforming growth factor-beta) plays a key role in osteoblast differentiation and bone development. While the ability of TGF-beta to inhibit the expression of osteoblast differentiation genes has been well documented, the mechanism of this inhibition is not yet completely characterized. Runx2, a transcription factor necessary for expression of osteoblast differentiation genes is a central target of inhibition by TGF-beta. In this study, we found that TGF-beta 1 inhibits expression of osteoblast differentiation genes without altering expression of Runx2. Transient transfection experiments determined that TGF-beta 1 inhibited osteocalcin promoter activity and this effect is mediated through Runx2. We further identified that there was no change in protein expression, cellular localization, or DNA binding affinity of Runx2 after TGF-beta 1-treatment of osteoblasts, suggesting that Runx2 undergoes post-translational modification following TGF-beta 1 treatment. Co-immunoprecipitation experiments identified increased phosphorylation of Runx2 when differentiating osteoblasts were treated with TGF-beta 1. Mitogen activated protein kinase(MAPK) inhibitors relieved the TGF-beta 1-inhibitory effect of Runx2-mediated osteocalcin expression. Thus, our results suggest that TGF-beta 1-inhibition of osteoblast differentiation is dependent on the MAPK pathway and this effect is most likely mediated by post-translational modification of Runx2 such as phosphorylation rather than other regulatory mechanism. J. Cell. Biochem. 106: 161-169, 2009. (C) 2008 Wiley-Liss, Inc.
C1 [Srinivasan, Narasaimhan; Selvamurugan, Nagarajan] Univ Madras Taramani, Dr ALM Post Grad Inst Basic Med Sci, Dept Endocrinol, Madras 600113, Tamil Nadu, India.
   [Kwok, Sukyee; Partridge, Nicola C.; Selvamurugan, Nagarajan] Univ Med & Dent New Jersey, Robert Wood Johnson Med Sch, Dept Physiol & Biophys, Piscataway, NJ 08854 USA.
   [Nair, Shantikumar V.; Selvamurugan, Nagarajan] Amrita Inst Med Sci, Ctr Nanosci, Kochi 682026, India.
RP Selvamurugan, N (corresponding author), Univ Madras Taramani, Dr ALM Post Grad Inst Basic Med Sci, Dept Endocrinol, Madras 600113, Tamil Nadu, India.
EM selvamn2@yahoo.com
RI Selvamurugan, Nagarajan/P-7894-2016
OI Selvamurugan, Nagarajan/0000-0003-3713-1920; Partridge,
   Nicola/0000-0002-5406-4814
FU Susan G. Komen Breast Cancer FoundationSusan G. Komen Breast Cancer
   Foundation; Department of DefenseUnited States Department of Defense;
   New Jersey Commission on Cancer Research; Institutes of HealthNational
   Health Research Institutes - Taiwan [W81XWH-04-1-0687, DK47420];
   NATIONAL INSTITUTE OF DIABETES AND DIGESTIVE AND KIDNEY DISEASESUnited
   States Department of Health & Human ServicesNational Institutes of
   Health (NIH) - USANIH National Institute of Diabetes & Digestive &
   Kidney Diseases (NIDDK) [R56DK047420, R01DK047420] Funding Source: NIH
   RePORTER
FX Susan G. Komen Breast Cancer Foundation; Grant sponsor: Department of
   Defense; Grant sponsor: New Jersey Commission on Cancer Research;
   National; Grant sponsor: Institutes of Health; Grant numbers:
   W81XWH-04-1-0687, DK47420.
CR Alliston T, 2001, EMBO J, V20, P2254, DOI 10.1093/emboj/20.9.2254
   Aronson BD, 1997, MOL CELL BIOL, V17, P5581, DOI 10.1128/MCB.17.9.5581
   Banerjee C, 1997, J CELL BIOCHEM, V66, P1, DOI 10.1002/(SICI)1097-4644(19970701)66:1<1::AID-JCB1>3.0.CO;2-V
   Canalis E, 2005, J Endocrinol Invest, V28, P3
   CENTRELLA M, 1985, P NATL ACAD SCI USA, V82, P7335, DOI 10.1073/pnas.82.21.7335
   CENTRELLA M, 1994, ENDOCR REV, V15, P27, DOI 10.1210/er.15.1.27
   Ducy P, 1997, CELL, V89, P747, DOI 10.1016/S0092-8674(00)80257-3
   Filvaroff E, 1999, DEVELOPMENT, V126, P4267
   Franceschi RT, 2003, CONNECT TISSUE RES, V44, P109, DOI 10.1080/03008200390152188
   Franceschi RT, 2003, J CELL BIOCHEM, V88, P446, DOI 10.1002/jcb.10369
   Galindo M, 2005, J BIOL CHEM, V280, P20274, DOI 10.1074/jbc.M413665200
   Ge CX, 2007, J CELL BIOL, V176, P709, DOI 10.1083/jcb.200610046
   Geiser AG, 1998, BONE, V23, P87, DOI 10.1016/S8756-3282(98)00078-7
   Held-Feindt J, 2003, J NEURO-ONCOL, V63, P117, DOI 10.1023/A:1023943405292
   Hjelmeland AB, 2005, MOL CELL BIOL, V25, P9460, DOI 10.1128/MCB.25.21.9460-9468.2005
   Huang G, 2001, EMBO J, V20, P723, DOI 10.1093/emboj/20.4.723
   Javed A, 2005, P NATL ACAD SCI USA, V102, P1454, DOI 10.1073/pnas.0409121102
   Jimenez MJG, 1999, MOL CELL BIOL, V19, P4431
   Kang JS, 2005, EMBO J, V24, P2543, DOI 10.1038/sj.emboj.7600729
   Kim HJ, 2003, J BIOL CHEM, V278, P319, DOI 10.1074/jbc.M203750200
   Kim S, 2003, GENE DEV, V17, P1979, DOI 10.1101/gad.1119303
   Komori T, 1997, CELL, V89, P755, DOI 10.1016/S0092-8674(00)80258-5
   Kwok S, 2005, J CELL BIOCHEM, V95, P1002, DOI 10.1002/jcb.20453
   Lian JB, 2004, CRIT REV EUKAR GENE, V14, P1
   Nakashima K, 2002, CELL, V108, P17, DOI 10.1016/s0092-8674(01)00622-5
   Otto F, 1997, CELL, V89, P765, DOI 10.1016/S0092-8674(00)80259-7
   OURSLER MJ, 1994, J BONE MINER RES, V9, P443
   Pallu S, 2004, J BONE MINER RES, V19, pS151
   Pratap J, 2005, MOL CELL BIOL, V25, P8581, DOI 10.1128/MCB.25.19.8581-8591.2005
   Rydziel S, 1997, J CELL PHYSIOL, V170, P145, DOI 10.1002/(SICI)1097-4652(199702)170:2<145::AID-JCP6>3.0.CO;2-O
   Schindeler A, 2006, J BONE MINER RES, V21, P1331, DOI 10.1359/JBMR.060603
   Selvamurugan N, 2004, J BIOL CHEM, V279, P19327, DOI 10.1074/jbc.M314048200
   Selvamurugan N, 1998, J BIOL CHEM, V273, P10647, DOI 10.1074/jbc.273.17.10647
   Selvamurugan N, 2000, J BIOL CHEM, V275, P5037, DOI 10.1074/jbc.275.7.5037
   Selvarnurugan N, 2007, J ORTHOP RES, V25, P1213, DOI 10.1002/jor.20409
   SHALHOUB V, 1992, J CELL BIOCHEM, V50, P425, DOI 10.1002/jcb.240500411
   Shi YG, 2003, CELL, V113, P685, DOI 10.1016/S0092-8674(03)00432-X
   Sowa H, 2002, J BIOL CHEM, V277, P36024, DOI 10.1074/jbc.M206030200
   Tintut Y, 1999, J BIOL CHEM, V274, P28875, DOI 10.1074/jbc.274.41.28875
   Vega RB, 2004, CELL, V119, P555, DOI 10.1016/j.cell.2004.10.024
   Wee HJ, 2002, EMBO REP, V3, P967, DOI 10.1093/embo-reports/kvf193
   Westendorf JJ, 2006, J CELL BIOCHEM, V98, P54, DOI 10.1002/jcb.20805
   Westendorf JJ, 2002, MOL CELL BIOL, V22, P7982, DOI 10.1128/MCB.22.22.7982-7992.2002
   Westendorf JJ, 1999, J CELL BIOCHEM, P51
   Xiao GZ, 2000, J BIOL CHEM, V275, P4453, DOI 10.1074/jbc.275.6.4453
   Xiao ZS, 2001, J CELL BIOCHEM, V82, P647, DOI 10.1002/jcb.1192
   Xiao ZS, 2003, J CELL BIOCHEM, V88, P493, DOI 10.1002/jcb.10375
   Yang SY, 2003, J BONE MINER RES, V18, P705, DOI 10.1359/jbmr.2003.18.4.705
   Yang YK, 2002, J BIOL CHEM, V277, P20328, DOI 10.1074/jbc.M201343200
   Zaidi SK, 2004, EMBO J, V23, P790, DOI 10.1038/sj.emboj.7600073
   Zhao M, 2003, J BIOL CHEM, V278, P27939, DOI 10.1074/jbc.M304132200
NR 51
TC 17
Z9 19
U1 0
U2 3
PU WILEY
PI HOBOKEN
PA 111 RIVER ST, HOBOKEN 07030-5774, NJ USA
SN 0730-2312
EI 1097-4644
J9 J CELL BIOCHEM
JI J. Cell. Biochem.
PD JAN 1
PY 2009
VL 106
IS 1
BP 161
EP 169
DI 10.1002/jcb.21991
PG 9
WC Biochemistry & Molecular Biology; Cell Biology
WE Science Citation Index Expanded (SCI-EXPANDED)
SC Biochemistry & Molecular Biology; Cell Biology
GA 391MY
UT WOS:000262238600018
PM 19051235
DA 2022-04-10
ER

PT S
AU Huang, Y
   Marton, LJ
   Woster, PM
   Casero, RA
AF Huang, Yi
   Marton, Laurence J.
   Woster, Patrick M.
   Casero, Robert A., Jr.
BE Wallace, H
TI Polyamine analogues targeting epigenetic gene regulation
SO ESSAYS IN BIOCHEMISTRY, VOL 46: THE POLYAMINES: SMALL MOLECULES IN THE
   OMICS ERA
SE Essays in Biochemistry
LA English
DT Review; Book Chapter
ID HISTONE DEACETYLASE INHIBITION; LYSINE-SPECIFIC DEMETHYLASE-1;
   POLYAMINOHYDROXAMIC ACIDS; SPERMINE OXIDASE; CANCER; DNA; REEXPRESSION;
   HOMOLOGATION; TRANSPORT; ROLES
AB Over the past three decades the metabolism and functions of the polyamines have been actively pursued as target for antineoplastic therapy. Interactions between cationic polyamines and negatively charged nucleic acids play a pivotal role in DNA stabilization and RNA processing that may affect gene expression, translation and protein activity. Our growing understanding of the unique roles that the polyamines play in chromatin regulation, and the discovery of novel proteins homologous with specific regulatory enzymes in polyamine metabolism, have led to our interest in exploring chromatin remodelling enzymes as potential therapeutic target for specific polyamine analogues. One of our initial efforts focused on utilizing the strong affinity that the polyamines have for chromatin to create a backbone structure, which could be combined with active-site-directed inhibitor moieties of HDACs (historic deacetylases). Specific PAHAs (polyaminohydroxamic acids) and PABAs (polyaminobenzamides) polyamine analogues have demonstrated potent inhibition of the HDACs, re-expression of p21 and significant inhibition of tumour growth. A second means of targeting the chromatin-remodelling enzymes with polyamine analogues was facilitated by the recent identification of flavin-dependent LSD1 (lysine-specific demethylase 1). The existence of tills enzyme demonstrated that historic lysine methylation is a dynamic process similar to other historic post-translational modification. LSD1 specifically catalyses demethylation of mono- and di-methyl Lys(4) of histone 3, key positive chromatin marks associated with transcriptional activation. Structural and catalytic similarities between LSD1 and polyamine oxidases facilitated the identification of biguanide, bisguanidine and oligoamine polyamine analogues that are potent inhibitors of LSD1. Cellular inhibition of LSD1 by these unique compounds led to the re-activation of multiple epigenetically silenced genes important in tumorigenesis. The use of these novel polyamine-based HDAC or LSD1 inhibitors represents a highly promising and novel approach to cancer prevention and therapy.
C1 [Huang, Yi; Casero, Robert A., Jr.] Johns Hopkins Univ, Sch Med, Sidney Kimmel Comprehens Canc Ctr Johns Hopkins, Baltimore, MD 21231 USA.
   [Marton, Laurence J.] Progen Pharmaceut, Redwood City, CA 94065 USA.
   [Woster, Patrick M.] Wayne State Univ, Dept Pharmaceut Sci, Detroit, MI 48202 USA.
RP Casero, RA (corresponding author), Johns Hopkins Univ, Sch Med, Sidney Kimmel Comprehens Canc Ctr Johns Hopkins, Bunting Blaustein Canc Res Bldg,1650 Orleans St, Baltimore, MD 21231 USA.
EM rcasero@jhmi.edu
RI Woster, Patrick M/A-5604-2010; Huang, Yi/AAW-7892-2021
OI Woster, Patrick M/0000-0002-9471-1916; Huang, Yi/0000-0002-9982-117X;
   Casero, Robert/0000-0001-5653-3306
FU NATIONAL CANCER INSTITUTEUnited States Department of Health & Human
   ServicesNational Institutes of Health (NIH) - USANIH National Cancer
   Institute (NCI) [R01CA051085, R01CA098454, R01CA085509] Funding Source:
   NIH RePORTER; NCI NIH HHSUnited States Department of Health & Human
   ServicesNational Institutes of Health (NIH) - USANIH National Cancer
   Institute (NCI) [R01 CA051085, R01 CA098454, R01 CA085509] Funding
   Source: Medline
CR Basu HS, 1997, EUR J BIOCHEM, V243, P247, DOI 10.1111/j.1432-1033.1997.0247a.x
   BASU HS, 1992, BIOCHEM J, V282, P723, DOI 10.1042/bj2820723
   Baylin SB, 2006, NAT REV CANCER, V6, P107, DOI 10.1038/nrc1799
   Binda C, 2002, J BIOL CHEM, V277, P23973, DOI 10.1074/jbc.R200005200
   Bolden JE, 2006, NAT REV DRUG DISCOV, V5, P769, DOI 10.1038/nrd2133
   Bradley C, 2007, CARCINOGENESIS, V28, P2184, DOI 10.1093/carcin/bgm100
   Cameron EE, 1999, NAT GENET, V21, P103, DOI 10.1038/5047
   Casero RA, 2007, NAT REV DRUG DISCOV, V6, P373, DOI 10.1038/nrd2243
   Coffino P, 2001, NAT REV MOL CELL BIO, V2, P188, DOI 10.1038/35056508
   Delcros JG, 2006, J MED CHEM, V49, P232, DOI 10.1021/jm050018q
   Gerner EW, 2009, CLIN CANCER RES, V15, P758, DOI 10.1158/1078-0432.CCR-08-2235
   Gore SD, 2006, CANCER RES, V66, P6361, DOI 10.1158/0008-5472.CAN-06-0080
   HOLLEY JL, 1992, CANCER RES, V52, P4190
   HUANG Y, 2009, AACR 100 ANN M DENV
   Huang Y, 2007, P NATL ACAD SCI USA, V104, P8023, DOI 10.1073/pnas.0700720104
   Jenuwein T, 2001, SCIENCE, V293, P1074, DOI 10.1126/science.1063127
   Jones PA, 2007, CELL, V128, P683, DOI 10.1016/j.cell.2007.01.029
   Kahl P, 2006, CANCER RES, V66, P11341, DOI 10.1158/0008-5472.CAN-06-1570
   Klose RJ, 2006, NAT REV GENET, V7, P715, DOI 10.1038/nrg1945
   Kuo MH, 1998, BIOESSAYS, V20, P615, DOI 10.1002/(SICI)1521-1878(199808)20:8<615::AID-BIES4>3.0.CO;2-H
   Lee MG, 2006, CHEM BIOL, V13, P563, DOI 10.1016/j.chembiol.2006.05.004
   McGarvey KM, 2006, CANCER RES, V66, P3541, DOI 10.1158/0008-5472.CAN-05-2481
   Murray-Stewart T, 2008, FEBS J, V275, P2795, DOI 10.1111/j.1742-4658.2008.06419.x
   MURRAYSTEWART T, 2008, P AM ASSOC CANC RES, V49, P2605
   Pegg AE, 2008, AM J PHYSIOL-ENDOC M, V294, pE995, DOI 10.1152/ajpendo.90217.2008
   Pegg AE, 2006, J BIOL CHEM, V281, P14529, DOI 10.1074/jbc.R500031200
   Phanstiel O, 2000, J ORG CHEM, V65, P5590, DOI 10.1021/jo0002792
   Pruitt K, 2006, PLOS GENET, V2, P344, DOI 10.1371/journal.pgen.0020040
   Sato N, 2003, J PROTEIN CHEM, V22, P303, DOI 10.1023/A:1025032906494
   Schulte JH, 2009, CANCER RES, V69, P2065, DOI 10.1158/0008-5472.CAN-08-1735
   Scoumanne A, 2007, J BIOL CHEM, V282, P15471, DOI 10.1074/jbc.M701023200
   Seiler N, 2005, PHARMACOL THERAPEUT, V107, P99, DOI 10.1016/j.pharmthera.2005.02.001
   Shi Y, 2007, NAT REV GENET, V8, P829, DOI 10.1038/nrg2218
   Shi YJ, 2004, CELL, V119, P941, DOI 10.1016/j.cell.2004.12.012
   Stavropoulos P, 2007, EXPERT OPIN THER TAR, V11, P809, DOI 10.1517/14728222.11.6.809
   Varghese S, 2005, J MED CHEM, V48, P6350, DOI 10.1021/jm0505009
   Varghese S, 2008, J MED CHEM, V51, P2447, DOI 10.1021/jm701384x
   Vujcic S, 2002, BIOCHEM J, V367, P665, DOI 10.1042/BJ20020720
   Wallace HM, 2003, BIOCHEM J, V376, P1, DOI 10.1042/BJ20031327
   Wang J, 2009, NAT GENET, V41, P125, DOI 10.1038/ng.268
   Wang YL, 2005, CANCER CHEMOTH PHARM, V56, P83, DOI 10.1007/s00280-004-0936-5
   Wang YL, 2001, CANCER RES, V61, P5370
   Wang YL, 2003, BIOCHEM BIOPH RES CO, V304, P605, DOI 10.1016/S0006-291X(03)00636-3
NR 43
TC 39
Z9 42
U1 0
U2 10
PU PORTLAND PRESS LTD
PI LONDON
PA 5TH FL, 90 HIGH HOLBORN, LONDON, WC1V 6LJ, ENGLAND
SN 0071-1365
EI 1744-1358
BN 978-1-85578-175-7
J9 ESSAYS BIOCHEM
JI Essays Biochem.
PY 2009
VL 46
BP 95
EP 110
DI 10.1042/BSE0460007
PG 16
WC Biochemistry & Molecular Biology
WE Book Citation Index – Science (BKCI-S); Science Citation Index Expanded (SCI-EXPANDED)
SC Biochemistry & Molecular Biology
GA BNS25
UT WOS:000275377000007
PM 20095972
OA Green Accepted
DA 2022-04-10
ER

PT J
AU Itoh, Y
AF Itoh, Yukihiro
TI Drug Discovery Researches on Modulators of Lysine-Modifying Enzymes
   Based on Strategic Chemistry Approaches
SO CHEMICAL & PHARMACEUTICAL BULLETIN
LA English
DT Review
DE protein knockdown; deacetylase; demethylase; ubiquitinationligase; enzyme
   inhibitor; proteolysis-targeting chimera (PROTAC)
ID HISTONE DEMETHYLASE LSD1; HUMAN CANCER-CELLS; IN-VIVO; RETINOIC ACID;
   BIOLOGICAL-ACTIVITY; PROTEIN KNOCKDOWN; post-translational modification;
   CRYSTAL-STRUCTURE; CLICK CHEMISTRY; SMALL MOLECULES
AB Enzymatic and post-translational modification (PTMs) such as ubiquitination, acetylation, and methylation occur at lysine residues. The PTMs play critical roles in the regulation of the protein functions, and thus, various cellular processes. In addition, aberrations of the PTMs are associated with various diseases, such as cancer and neurodegenerative disorders. Therefore, we hypothesized that modulation of the PTMs and normalization of the PTM abnormalities could be useful as methods to control various cellular mechanism and as a therapeutic strategy, respectively. To modulate the PTMs, we have focused on lysine-modifying enzymes and have pursued drug discovery researches on ubiquitination inducers, lysine deacetylase (KDAC) inhibitors, and lysine demethylase (KDM) inhibitors. For the identification of the modulators, we have used not only conventional drug design, such as structure-based drug design (SBDD) and ligand-based drug design (LBDD), but also "strategic chemistry approaches," such as drug design based on enzyme catalytic mechanism. As a result, we have identified several modulators which have pharmacological effects in animal models or in cellular studies. In this review, focusing on the drug design based on enzyme catalytic mechanism, our drug discovery researches have been discussed.
C1 [Itoh, Yukihiro] Kyoto Prefectural Univ Med, Grad Sch Med Sci, Sakyo Ku, 1-5 Shimogamohangi Cho, Kyoto 6060823, Japan.
RP Itoh, Y (corresponding author), Kyoto Prefectural Univ Med, Grad Sch Med Sci, Sakyo Ku, 1-5 Shimogamohangi Cho, Kyoto 6060823, Japan.
EM itohy@koto.kpu-m.ac.jp
OI Itoh, Yukihiro/0000-0002-3410-2924
FU JST A-step program [957908]; Takeda Science FoundationTakeda Science
   Foundation (TSF); Terumo Life Science FoundationTerumo Life Science
   Foundation; Tokyo Biochemical Research Foundation;  [19H05295]; 
   [26870495];  [24890193];  [10J09667]
FX I would like to thank my collaborators, especially Prof. Takayoshi
   Suzuki, Prof. Naoki Miyata, Prof. Yuichi Hashimoto, Dr. Mikihiko Naito,
   Prof. Minoru Ishikawa, and Prof. Hidehiko Nakagawa. The research was
   partially supported by Grants-in-Aid for Scientific Research on
   Innovative Areas "ubiquitinationnew frontier driven by Chemo-technologies"
   (19H05295), Young Scientists (B) (26870495), Research Activity Start-up
   (24890193) and JSPS Fellows (10J09667), and by the JST A-step program
   (957908). I am also supported by Grants from Takeda Science Foundation,
   Terumo Life Science Foundation, and the Tokyo Biochemical Research
   Foundation.
CR Arbez N, 2017, J BIOL CHEM, V292, P19238, DOI 10.1074/jbc.M117.782300
   Archer TC, 2018, CANCER CELL, V34, P396, DOI 10.1016/j.ccell.2018.08.004
   Arrowsmith CH, 2012, NAT REV DRUG DISCOV, V11, P384, DOI 10.1038/nrd3674
   Atkin G, 2014, FRONT MOL NEUROSCI, V7, DOI 10.3389/fnmol.2014.00063
   Bannister AJ, 2011, CELL RES, V21, P381, DOI 10.1038/cr.2011.22
   Barski A, 2007, CELL, V129, P823, DOI 10.1016/j.cell.2007.05.009
   Ben Yehuda A, 2017, PLOS ONE, V12, DOI 10.1371/journal.pone.0169054
   Bertozzi C, 2008, ESSENTIALS GLYCOBIOL
   Biggar KK, 2015, NAT REV MOL CELL BIO, V16, P5, DOI 10.1038/nrm3915
   Black JC, 2012, MOL CELL, V48, P491, DOI 10.1016/j.molcel.2012.11.006
   Bondeson DP, 2015, NAT CHEM BIOL, V11, P611, DOI [10.1038/NCHEMBIO.1858, 10.1038/nchembio.1858]
   Budhu AS, 2002, MOL CELL BIOL, V22, P2632, DOI 10.1128/MCB.22.8.2632-2641.2002
   Buetow L, 2016, NAT REV MOL CELL BIO, V17, P626, DOI 10.1038/nrm.2016.91
   Burslem GM, 2017, CHEM REV, V117, P11269, DOI 10.1021/acs.chemrev.7b00077
   Buuh ZY, 2018, J MED CHEM, V61, P3239, DOI 10.1021/acs.jmedchem.6b01817
   Chalkiadaki A, 2015, NAT REV CANCER, V15, DOI 10.1038/nrc3985
   CHAPMAN J M, 1990, Protein Expression and Purification, V1, P63, DOI 10.1016/1046-5928(90)90047-3
   Chen Y, 2006, P NATL ACAD SCI USA, V103, P13956, DOI 10.1073/pnas.0606381103
   Choudhary C, 2009, SCIENCE, V325, P834, DOI 10.1126/science.1175371
   Copeland RA, 2016, NAT REV DRUG DISCOV, V15, P87, DOI 10.1038/nrd.2015.18
   Cueva JG, 2012, CURR BIOL, V22, P1066, DOI 10.1016/j.cub.2012.05.012
   Cui GF, 2012, NAT STRUCT MOL BIOL, V19, P916, DOI 10.1038/nsmb.2353
   da Silva SR, 2013, J MED CHEM, V56, P2165, DOI 10.1021/jm301420b
   Dawson MA, 2012, CELL, V150, P12, DOI 10.1016/j.cell.2012.06.013
   Del Rizzo PA, 2014, BBA-GENE REGUL MECH, V1839, P1404, DOI 10.1016/j.bbagrm.2014.06.008
   Dutta A, 2016, MOL CELL, V63, P547, DOI 10.1016/j.molcel.2016.06.038
   Ferrari KJ, 2014, MOL CELL, V53, P49, DOI 10.1016/j.molcel.2013.10.030
   Fu XL, 2017, FUTURE MED CHEM, V9, P1227, DOI 10.4155/fmc-2017-0068
   Georgi V, 2018, J AM CHEM SOC, V140, P15774, DOI 10.1021/jacs.8b08048
   Gooden DM, 2008, BIOORG MED CHEM LETT, V18, P3047, DOI 10.1016/j.bmcl.2008.01.003
   Greenberg MVC, 2019, NAT REV MOL CELL BIO, V20, P590, DOI 10.1038/s41580-019-0159-6
   Hamada S, 2010, J MED CHEM, V53, P5629, DOI 10.1021/jm1003655
   Hamada S, 2009, BIOORG MED CHEM LETT, V19, P2852, DOI 10.1016/j.bmcl.2009.03.098
   Hershko A, 1998, ANNU REV BIOCHEM, V67, P425, DOI 10.1146/annurev.biochem.67.1.425
   Higuchi F, 2016, J NEUROSCI, V36, P7253, DOI 10.1523/JNEUROSCI.0319-16.2016
   Hodawadekar SC, 2007, ONCOGENE, V26, P5528, DOI 10.1038/sj.onc.1210619
   Hosseini A, 2017, EPIGENOMICS-UK, V9, P1123, DOI 10.2217/epi-2017-0022
   Hu P, 2008, J AM CHEM SOC, V130, P16721, DOI 10.1021/ja807269j
   Huang H, 2018, NAT COMMUN, V9, DOI 10.1038/s41467-018-05567-w
   Huang H, 2014, CELL, V159, P458, DOI 10.1016/j.cell.2014.09.037
   Huang HL, 2019, NATURE, V567, P414, DOI 10.1038/s41586-019-1016-7
   Hubbert C, 2002, NATURE, V417, P455, DOI 10.1038/417455a
   Hunter T, 2000, CELL, V100, P113, DOI 10.1016/S0092-8674(00)81688-8
   Imamura H, 2010, BMC BIOINFORMATICS, V11, DOI 10.1186/1471-2105-11-232
   Ito A, 2015, SCI SIGNAL, V8, DOI 10.1126/scisignal.aad0667
   Itoh Y, 2008, CURR PHARM DESIGN, V14, P529
   Itoh Y, 2007, J MED CHEM, V50, P5425, DOI 10.1021/jm7009217
   Itoh Y, 2019, SCI REP-UK, V9, DOI 10.1038/s41598-018-36987-9
   Itoh Y, 2018, CHEM REC, V18, P1681, DOI 10.1002/tcr.201800032
   Itoh Y, 2018, BIOORG MED CHEM LETT, V28, P2723, DOI 10.1016/j.bmcl.2018.03.004
   Itoh Y, 2017, YAKUGAKU ZASSHI, V137, P283, DOI 10.1248/yakushi.16-00231-1
   Itoh Y, 2016, CHEM PHARM BULL, V64, P1124, DOI 10.1248/cpb.c16-00123
   Itoh Y, 2016, J MED CHEM, V59, P1531, DOI 10.1021/acs.jmedchem.5b01323
   Itoh Y, 2015, ACS MED CHEM LETT, V6, P665, DOI 10.1021/acsmedchemlett.5b00083
   Itoh Y, 2014, COMPUT STRUCT BIOTEC, V9, DOI 10.5936/csbj.201402002
   Itoh Y, 2013, MOL BIOSYST, V9, P873, DOI 10.1039/c3mb25410k
   Itoh Y, 2012, BIOORG MED CHEM LETT, V22, P4453, DOI 10.1016/j.bmcl.2012.04.134
   Itoh Y, 2011, BIOORGAN MED CHEM, V19, P6768, DOI 10.1016/j.bmc.2011.09.041
   Itoh Y, 2011, BIOORGAN MED CHEM, V19, P3229, DOI 10.1016/j.bmc.2011.03.057
   Itoh Y, 2010, J AM CHEM SOC, V132, P5820, DOI 10.1021/ja100691p
   Jaikhan P, 2019, BIOORG MED CHEM LETT, V29, P1173, DOI 10.1016/j.bmcl.2019.03.028
   Jansen AHP, 2014, FRONT MOL NEUROSCI, V7, DOI 10.3389/fnmol.2014.00073
   Jing H, 2016, CANCER CELL, V29, P297, DOI 10.1016/j.ccell.2016.02.007
   Jonkhout N, 2017, RNA, V23, P1754, DOI 10.1261/rna.063503.117
   Kakizawa T, 2018, BIOORG MED CHEM LETT, V28, P167, DOI 10.1016/j.bmcl.2017.11.035
   Kakizawa T, 2015, BIOORG MED CHEM LETT, V25, P1925, DOI 10.1016/j.bmcl.2015.03.030
   Kamps JJAG, 2015, NAT COMMUN, V6, DOI 10.1038/ncomms9911
   Karytinos A, 2009, J BIOL CHEM, V284, P17775, DOI 10.1074/jbc.M109.003087
   Khan MNA, 2015, MEDCHEMCOMM, V6, P407, DOI 10.1039/c4md00330f
   Konovalov S, 2013, J OVARIAN RES, V6, DOI 10.1186/1757-2215-6-75
   Kouzarides T, 2007, CELL, V128, P693, DOI 10.1016/j.cell.2007.02.005
   Kozako T, 2014, MOLECULES, V19, P20295, DOI 10.3390/molecules191220295
   Krueger KE, 2006, MOL CELL PROTEOMICS, V5, P1799, DOI 10.1074/mcp.R600009-MCP200
   Kubicek S, 2004, CELL, V119, P903, DOI 10.1016/j.cell.2004.12.006
   Lai AC, 2017, NAT REV DRUG DISCOV, V16, P101, DOI 10.1038/nrd.2016.211
   Levy D, 2019, CELL MOL LIFE SCI, V76, P2873, DOI 10.1007/s00018-019-03142-0
   Li L, 2015, CELL MOL LIFE SCI, V72, P4237, DOI 10.1007/s00018-015-2000-5
   Li YB, 2019, J MED CHEM, V62, P448, DOI 10.1021/acs.jmedchem.8b00909
   Liang LX, 2018, CELL CHEM BIOL, V25, P761, DOI 10.1016/j.chembiol.2018.03.010
   Liang Y, 2009, NAT MED, V15, P1312, DOI 10.1038/nm.2051
   Lin XY, 2019, NAT COMMUN, V10, DOI 10.1038/s41467-019-09865-9
   Liu J, 2018, NAT CELL BIOL, V20, P1074, DOI 10.1038/s41556-018-0174-4
   LOCK LF, 1987, CELL, V48, P39, DOI 10.1016/0092-8674(87)90353-9
   Luo M, 2018, CHEM REV, V118, P6656, DOI 10.1021/acs.chemrev.8b00008
   Mamidyala SK, 2010, CHEM SOC REV, V39, P1252, DOI 10.1039/b901969n
   Martin DDO, 2018, SCI REP-UK, V8, DOI 10.1038/s41598-018-25903-w
   Martin L, 2011, NEUROCHEM INT, V58, P458, DOI 10.1016/j.neuint.2010.12.023
   Mellini P, 2019, J MED CHEM, V62, P5844, DOI 10.1021/acs.jmedchem.9b00255
   Mellini P, 2017, CHEM SCI, V8, P6400, DOI 10.1039/c7sc02738a
   Miyake Y, 2019, BIOORGAN MED CHEM, V27, P1119, DOI 10.1016/j.bmc.2019.02.006
   Miyamura S, 2016, ORG BIOMOL CHEM, V14, P8576, DOI 10.1039/c6ob01483f
   Mocharla VP, 2005, ANGEW CHEM INT EDIT, V44, P116, DOI 10.1002/anie.200461580
   MOHANDAS T, 1981, SCIENCE, V211, P393, DOI 10.1126/science.6164095
   Mullard A, 2019, NAT REV DRUG DISCOV, V18, P237
   Nabet B, 2018, NAT CHEM BIOL, V14, P431, DOI 10.1038/s41589-018-0021-8
   Narita T, 2019, NAT REV MOL CELL BIO, V20, P156, DOI 10.1038/s41580-018-0081-3
   Nebbioso A, 2018, PLOS GENET, V14, DOI 10.1371/journal.pgen.1007362
   Neelamegam R, 2012, ACS CHEM NEUROSCI, V3, P120, DOI 10.1021/cn200104y
   North BJ, 2003, MOL CELL, V11, P437, DOI 10.1016/S1097-2765(03)00038-8
   Ogasawara D, 2013, ANGEW CHEM INT EDIT, V52, P8620, DOI 10.1002/anie.201303999
   Ohoka N, 2017, J BIOL CHEM, V292, P4556, DOI 10.1074/jbc.M116.768853
   Okitsu K, 2018, J MED CHEM, V61, P576, DOI 10.1021/acs.jmedchem.7b00413
   Okuhira K, 2017, MOL PHARMACOL, V91, P159, DOI 10.1124/mol.116.105569
   Okuhira K, 2011, FEBS LETT, V585, P1147, DOI 10.1016/j.febslet.2011.03.019
   Olsen JV, 2006, CELL, V127, P635, DOI 10.1016/j.cell.2006.09.026
   Ontiveros RJ, 2019, BIOCHEM J, V476, P1227, DOI 10.1042/BCJ20180445
   Ota Y, 2019, CHEM PHARM BULL, V67, P192, DOI 10.1248/cpb.c18-00577
   Ota Y, 2018, CHEM REC, V18, P1782, DOI 10.1002/tcr.201810031
   Ota Y, 2018, MOLECULES, V23, DOI 10.3390/molecules23051099
   Ota Y, 2018, BIOORGAN MED CHEM, V26, P775, DOI 10.1016/j.bmc.2017.12.045
   Ota Y, 2016, ANGEW CHEM INT EDIT, V55, P16115, DOI 10.1002/anie.201608711
   Otterstrom J, 2019, NUCLEIC ACIDS RES, V47, P8470, DOI 10.1093/nar/gkz593
   Outeiro TF, 2007, SCIENCE, V317, P516, DOI 10.1126/science.1143780
   Patel DJ, 2013, ANNU REV BIOCHEM, V82, P81, DOI 10.1146/annurev-biochem-072711-165700
   Perrod S, 2001, EMBO J, V20, P197, DOI 10.1093/emboj/20.1.197
   Peserico A, 2011, J BIOMED BIOTECHNOL, DOI 10.1155/2011/371832
   Portran D, 2017, NAT CELL BIOL, V19, P391, DOI 10.1038/ncb3481
   Quinti L, 2016, CELL CHEM BIOL, V23, P849, DOI 10.1016/j.chembiol.2016.05.015
   Rienhoff Jr H. Y., 2016, Patent WO, Patent No. 2016130952
   Ries RJ, 2019, NATURE, V571, P424, DOI 10.1038/s41586-019-1374-1
   Rumpf T, 2015, NAT COMMUN, V6, DOI 10.1038/ncomms7263
   Sabari BR, 2017, NAT REV MOL CELL BIO, V18, P90, DOI 10.1038/nrm.2016.140
   Schaefer A, 2009, NEURON, V64, P678, DOI 10.1016/j.neuron.2009.11.019
   Schenk T, 2012, NAT MED, V18, P605, DOI 10.1038/nm.2661
   Schmidt DMZ, 2007, BIOCHEMISTRY-US, V46, P4408, DOI 10.1021/bi0618621
   Schug TT, 2007, CELL, V129, P723, DOI 10.1016/j.cell.2007.02.050
   Schulte JH, 2009, CANCER RES, V69, P2065, DOI 10.1158/0008-5472.CAN-08-1735
   Sekine K, 2008, J BIOL CHEM, V283, P8961, DOI 10.1074/jbc.M709525200
   Sekizawa H, 2014, ACS MED CHEM LETT, V5, P582, DOI 10.1021/ml500024s
   Seto E, 2014, CSH PERSPECT BIOL, V6, DOI 10.1101/cshperspect.a018713
   Shi YJ, 2004, CELL, V119, P941, DOI 10.1016/j.cell.2004.12.012
   Shibata N, 2018, J MED CHEM, V61, P543, DOI 10.1021/acs.jmedchem.7b00168
   Smith BC, 2007, J AM CHEM SOC, V129, P5802, DOI 10.1021/ja070162w
   Spradlin JN, 2019, NAT CHEM BIOL, V15, P747, DOI 10.1038/s41589-019-0304-8
   Stavropoulos P, 2006, NAT STRUCT MOL BIOL, V13, P626, DOI 10.1038/nsmb1113
   Sugino N, 2017, LEUKEMIA, V31, P2303, DOI 10.1038/leu.2017.59
   Sun B, 2018, LEUKEMIA, V32, P343, DOI 10.1038/leu.2017.207
   Suzuki T, 2007, BIOORG MED CHEM LETT, V17, P4208, DOI 10.1016/j.bmcl.2007.05.040
   Suzuki T, 2007, BIOORG MED CHEM LETT, V17, P1558, DOI 10.1016/j.bmcl.2006.12.117
   Suzuki T, 2006, J MED CHEM, V49, P4809, DOI 10.1021/jm060554y
   Suzuki T, 2014, CHEMMEDCHEM, V9, P657, DOI 10.1002/cmdc.201300414
   Suzuki T, 2013, J MED CHEM, V56, P7222, DOI 10.1021/jm400624b
   Suzuki T, 2013, PLOS ONE, V8, DOI 10.1371/journal.pone.0068669
   Suzuki T, 2012, J MED CHEM, V55, P9562, DOI 10.1021/jm300837y
   Suzuki T, 2012, J MED CHEM, V55, P5760, DOI 10.1021/jm3002108
   Suzuki T, 2011, J MED CHEM, V54, P8236, DOI 10.1021/jm201048w
   Suzuki T, 2010, ANGEW CHEM INT EDIT, V49, P6817, DOI 10.1002/anie.201002205
   Suzuki T, 2009, BIOORG MED CHEM LETT, V19, P5670, DOI 10.1016/j.bmcl.2009.08.028
   Suzuki T, 2009, CHEM PHARM BULL, V57, P897, DOI 10.1248/cpb.57.897
   Tan SH, 2019, BIOMED PHARMACOTHER, V111, P765, DOI 10.1016/j.biopha.2018.12.101
   Tatum PR, 2014, BIOORG MED CHEM LETT, V24, P1871, DOI 10.1016/j.bmcl.2014.03.026
   Taylor DM, 2011, ACS CHEM BIOL, V6, P540, DOI 10.1021/cb100376q
   Tomoshige S, 2017, ANGEW CHEM INT EDIT, V56, P11530, DOI 10.1002/anie.201706529
   Tsukamoto S, 2018, J CHEM PHYS, V148, DOI 10.1063/1.5019209
   Vincenzi M, CURR MED CHEM
   Walkup GK, 2015, NAT CHEM BIOL, V11, P416, DOI 10.1038/nchembio.1796
   Wang YX, 2018, J MED CHEM, V61, P1074, DOI 10.1021/acs.jmedchem.7b01536
   Weaver TM, 2018, MOLECULES, V23, DOI 10.3390/molecules23102614
   Wenzel DM, 2011, BIOCHEM J, V433, P31, DOI 10.1042/BJ20100985
   West LE, 2010, J BIOL CHEM, V285, P37725, DOI 10.1074/jbc.M110.139527
   Winter GE, 2015, SCIENCE, V348, P1376, DOI 10.1126/science.aab1433
   Wu Q, 2018, J PROTEOME RES, V17, P3176, DOI 10.1021/acs.jproteome.8b00289
   Xu HD, 2018, GENOM PROTEOM BIOINF, V16, P244, DOI 10.1016/j.gpb.2018.06.004
   Yang MJ, 2007, BIOCHEMISTRY-US, V46, P8058, DOI 10.1021/bi700664y
   YOSHIDA M, 1990, J BIOL CHEM, V265, P17174
   Yoshida Minoru, 2003, Prog Cell Cycle Res, V5, P269
   Zhan P, 2015, J MED CHEM, V58, P7611, DOI 10.1021/acs.jmedchem.5b00229
   Zhang XH, 2007, MOL CELL, V27, P197, DOI 10.1016/j.molcel.2007.05.033
   Zhang XY, 2019, NAT CHEM BIOL, V15, P737, DOI 10.1038/s41589-019-0279-5
   Zhang Y, 2009, ONCOGENE, V28, P445, DOI 10.1038/onc.2008.388
NR 170
TC 4
Z9 4
U1 9
U2 25
PU PHARMACEUTICAL SOC JAPAN
PI TOKYO
PA 2-12-15 SHIBUYA, SHIBUYA-KU, TOKYO, 150-0002, JAPAN
SN 0009-2363
J9 CHEM PHARM BULL
JI Chem. Pharm. Bull.
PD JAN
PY 2020
VL 68
IS 1
BP 34
EP 45
DI 10.1248/cpb.c19-00741
PG 12
WC Chemistry, Medicinal; Chemistry, Multidisciplinary; Pharmacology &
   Pharmacy
WE Science Citation Index Expanded (SCI-EXPANDED)
SC Pharmacology & Pharmacy; Chemistry
GA JZ2QA
UT WOS:000504947200002
PM 31902900
OA gold
DA 2022-04-10
ER

PT J
AU Shirmohammady, N
   Izadkhah, H
   Isazadeh, A
AF Shirmohammady, Naeem
   Izadkhah, Habib
   Isazadeh, Ayaz
TI PPI-GA: A Novel Clustering Algorithm to Identify Protein Complexes
   within Protein-Protein Interaction Networks Using Genetic Algorithm
SO COMPLEXITY
LA English
DT Article
AB Comprehensive analysis of proteins to evaluate their genetic diversity, study their differences, and respond to the tensions is the main subject of an interdisciplinary field of study called proteomics. The main objective of the proteomics is to detect and quantify proteins and study their post-translational modification and interactions using protein chemistry, bioinformatics, and biology. Any disturbance in proteins interactive network can act as a source for biological disorders and various diseases such as Alzheimer and cancer. Most current computational methods for discovering protein complexes are usually based on specific topological characteristics of protein-protein networks (PPI). To identify the protein complexes, in this paper, we, first, present a new encoding method to represent solutions; we then propose a new clustering algorithm based on the genetic algorithm, named PPI-GA, employing a new multiobjective quality function. The proposed algorithm is evaluated on two gold standard and real-world datasets. The result achieved demonstrates that the proposed algorithm can detect important protein complexes, and it provides more accurate results compared with state-of-the-art protein complex identification algorithms.
C1 [Shirmohammady, Naeem; Izadkhah, Habib; Isazadeh, Ayaz] Univ Tabriz, Fac Math Sci, Dept Comp Sci, Tabriz, Iran.
RP Izadkhah, H (corresponding author), Univ Tabriz, Fac Math Sci, Dept Comp Sci, Tabriz, Iran.
EM izadkhah@tabrizu.ac.ir
OI Shirmohammadi, Naeem/0000-0001-8181-1275
CR Adamcsek B, 2006, BIOINFORMATICS, V22, P1021, DOI 10.1093/bioinformatics/btl039
   Altaf-Ul-Amin M, 2006, BMC BIOINFORMATICS, V7, DOI 10.1186/1471-2105-7-207
   Bader GD, 2003, BMC BIOINFORMATICS, V4, DOI 10.1186/1471-2105-4-2
   Brohee S, 2006, BMC BIOINFORMATICS, V7, DOI 10.1186/1471-2105-7-488
   Cao BW, 2015, COMPUT BIOL CHEM, V58, P173, DOI 10.1016/j.compbiolchem.2015.06.006
   Dongen S.V., 2000, INSR0010 NAT RES I M
   Dunn R, 2005, BMC BIOINFORMATICS, V6, DOI 10.1186/1471-2105-6-39
   Gu L, 2019, NEURAL COMPUT APPL, V31, P1481, DOI 10.1007/s00521-018-3508-z
   Jiang P, 2010, BIOINFORMATICS, V26, P1105, DOI 10.1093/bioinformatics/btq078
   Kalaivani S, 2018, ADV INTELL SYST, V710, P449, DOI 10.1007/978-981-10-7871-2_43
   Lei XJ, 2019, KNOWL-BASED SYST, V172, P76, DOI 10.1016/j.knosys.2019.02.011
   Mewes HW, 2019, YEAST, V36, P161, DOI 10.1002/yea.3378
   Mewes HW, 2002, NUCLEIC ACIDS RES, V30, P31, DOI 10.1093/nar/30.1.31
   Nepusz T, 2012, NAT METHODS, V9, P471, DOI [10.1038/NMETH.1938, 10.1038/nmeth.1938]
   Paniagua F.A, 2019, INTERAM J PSYCHOL, V53, P17
   Pizzuti C, 2014, NEUROCOMPUTING, V145, P53, DOI 10.1016/j.neucom.2014.06.061
   Pizzuti C, 2012, IEEE ACM T COMPUT BI, V9, P717, DOI 10.1109/TCBB.2011.158
   Pourasghar B, 2021, INFORM SOFTWARE TECH, V133, DOI 10.1016/j.infsof.2020.106469
   Pourbahrami S., 2020, IRAN J COMPUTER SCI, V3, P59, DOI [10.1007/s42044-019-00050-1, DOI 10.1007/S42044-019-00050-1]
   Przulj N, 2004, BIOINFORMATICS, V20, P340, DOI 10.1093/bioinformatics/btg415
   Ramadan E, 2016, BMC BIOINFORMATICS, V17, DOI 10.1186/s12859-016-1096-4
   Rani RR, 2019, SCI REP-UK, V9, DOI 10.1038/s41598-019-47468-y
   Reguly Teresa, 2006, J Biol, V5, P11, DOI 10.1186/jbiol36
   Samieefar K., 2019, IRAN J COMPUT SCI, V2, P23, DOI [10.1007/s42044-018-0025-2, DOI 10.1007/S42044-018-0025-2]
   Sikandar A, 2018, IEEE ACCESS, V6, P22108, DOI 10.1109/ACCESS.2018.2807811
   Tan P.N., 2013, INTRO DATA MINING, P487
   Teymourian N., 2020, IEEE T SOFTWARE ENG, P1, DOI [10.1109/TSE.2020.3022212, DOI 10.1109/TSE.2020.3022212]
   Wu ZR, 2020, BRIEF BIOINFORM, V21, P1531, DOI 10.1093/bib/bbz085
   Zahiri J, 2020, GENOMICS, V112, P174, DOI 10.1016/j.ygeno.2019.01.011
   Zhang YJ, 2013, IEEE ACM T COMPUT BI, V10, P729, DOI 10.1109/TCBB.2013.86
NR 30
TC 0
Z9 0
U1 0
U2 2
PU WILEY-HINDAWI
PI LONDON
PA ADAM HOUSE, 3RD FL, 1 FITZROY SQ, LONDON, WIT 5HE, ENGLAND
SN 1076-2787
EI 1099-0526
J9 COMPLEXITY
JI Complexity
PD MAR 25
PY 2021
VL 2021
AR 2132516
DI 10.1155/2021/2132516
PG 14
WC Mathematics, Interdisciplinary Applications; Multidisciplinary Sciences
WE Science Citation Index Expanded (SCI-EXPANDED)
SC Mathematics; Science & Technology - Other Topics
GA RJ1LJ
UT WOS:000637363100006
OA gold
DA 2022-04-10
ER

PT J
AU Chung, HH
   Sze, SK
   Woo, ARE
   Sun, Y
   Sim, KH
   Dong, XM
   Lin, VCL
AF Chung, Hwa Hwa
   Sze, Siu Kwan
   Woo, Amanda Rui En
   Sun, Yang
   Sim, Kae Hwan
   Dong, Xue Ming
   Lin, Valerie C-L.
TI Lysine Methylation of Progesterone Receptor at Activation Function 1
   Regulates both Ligand-independent Activity and Ligand Sensitivity of the
   Receptor
SO JOURNAL OF BIOLOGICAL CHEMISTRY
LA English
DT Article
DE Post-translational Modification; Protein Methylation; Steroid Hormone;
   Steroid Hormone Receptor; Transcription
ID BREAST-CANCER CELLS; ESTROGEN PLUS PROGESTIN; TRANSCRIPTIONAL ACTIVITY;
   ISOFORM-B; CO-REPRESSOR; CROSS-TALK; ALPHA; PHOSPHORYLATION; RESISTANCE;
   DOMAINS
AB Background: Activation function 1 (AF-1) is important for the activity of progesterone receptor (PR), but its functional motif is not known. Results: AF-1 of progesterone receptor (PR) is monomethylated at Lys-464. Lys-464 mutation markedly alters PR properties and ligand sensitivity. Conclusion: Lys-464 is critical for AF-1 function. Significance: Lys-464 is a potential target for modulating AF-1 activity of PR.
   Progesterone receptor (PR) exists in two isoforms, PRA and PRB, and both contain activation functions AF-1 and AF-2. It is believed that AF-1 is primarily responsible for the ligand-independent activity, whereas AF-2 mediates ligand-dependent PR activation. Although more than a dozen post-translational modification of PR have been reported, no post-translational modification on AF-1 or AF-2 has been reported. Using LC-MS/MS-based proteomic analysis, this study revealed AF-1 monomethylation at Lys-464. Mutational analysis revealed the remarkable importance of Lys-464 in regulating PR activity. Single point mutation K464Q or K464A led to ligand-independent PR gel upshift similar to the ligand-induced gel upshift. This upshift was associated with increases in both ligand-dependent and ligand-independent PR phosphorylation and PR activity due to the hyperactivation of AF-1. In contrast, mutation of Lys-464 to the bulkier phenylalanine to mimic the effect of methylation caused a drastic decrease in PR activity. Importantly, PR-K464Q also showed heightened ligand sensitivity, and this was associated with increases in its functional interaction with transcription co-regulators NCoR1 and SRC-1. These results suggest that monomethylation of PR at Lys-464 probably has a repressive effect on AF-1 activity and ligand sensitivity.
C1 [Chung, Hwa Hwa; Sze, Siu Kwan; Woo, Amanda Rui En; Sun, Yang; Sim, Kae Hwan; Dong, Xue Ming; Lin, Valerie C-L.] Nanyang Technol Univ, Sch Biol Sci, Singapore 637551, Singapore.
RP Lin, VCL (corresponding author), Nanyang Technol Univ, Sch Biol Sci, 60 Nanyang Dr, Singapore 637551, Singapore.
EM cllin@ntu.edu.sg
RI Sze, Siu_kwan Newman/A-2199-2011; Chun Ling, Valerie Lin/A-2188-2011;
   Sze, Siu Kwan/AAO-3342-2020; Dong, Xueming/M-2137-2017
OI Sze, Siu_kwan Newman/0000-0002-5652-1687; Sze, Siu
   Kwan/0000-0002-5652-1687; Dong, Xueming/0000-0001-8726-7565
FU Ministry of Education of SingaporeMinistry of Education, Singapore
FX This work was supported by a grant from the Ministry of Education of
   Singapore (to V. C.-L. L.).
CR Abdel-Hafiz H, 2002, J BIOL CHEM, V277, P33950, DOI 10.1074/jbc.M204573200
   Abdel-Hafiz H, 2009, J BIOL CHEM, V284, P9099, DOI 10.1074/jbc.M805226200
   Arao Y, 2011, P NATL ACAD SCI USA, V108, P14986, DOI 10.1073/pnas.1109180108
   Arnal JF, 2013, STEROIDS, V78, P576, DOI 10.1016/j.steroids.2012.11.011
   Ballare C, 2003, MOL CELL BIOL, V23, P1994, DOI 10.1128/MCB.23.6.1994-2008.2003
   Bamberger AM, 1996, P NATL ACAD SCI USA, V93, P6169, DOI 10.1073/pnas.93.12.6169
   Banks E, 2003, LANCET, V362, P419, DOI 10.1016/S0140-6736(03)14065-2
   Baptist Alan P, 2004, Clin Mol Allergy, V2, P10, DOI 10.1186/1476-7961-2-10
   Boonyaratanakornkit V, 2001, MOL CELL, V8, P269, DOI 10.1016/S1097-2765(01)00304-5
   Borjesson AE, 2011, P NATL ACAD SCI USA, V108, P6288, DOI 10.1073/pnas.1100454108
   Bottomley MJ, 2004, EMBO REP, V5, P464, DOI 10.1038/sj.embor.7400146
   Brayman MJ, 2006, MOL ENDOCRINOL, V20, P2278, DOI 10.1210/me.2005-0343
   Brezillon S, 2009, CANCER LETT, V283, P92, DOI 10.1016/j.canlet.2009.03.032
   Bulun SE, 2006, MOL CELL ENDOCRINOL, V248, P94, DOI 10.1016/j.mce.2005.11.041
   Bulun SE, 2010, SEMIN REPROD MED, V28, P36, DOI 10.1055/s-0029-1242991
   Bunone G, 1996, EMBO J, V15, P2174, DOI 10.1002/j.1460-2075.1996.tb00571.x
   Buzdar A, 2001, J CLIN ONCOL, V19, P3357, DOI 10.1200/JCO.2001.19.14.3357
   Chauchereau A, 2003, J BIOL CHEM, V278, P12335, DOI 10.1074/jbc.M207148200
   CHEN JD, 1995, NATURE, V377, P454, DOI 10.1038/377454a0
   Chlebowski RT, 2010, JAMA-J AM MED ASSOC, V304, P1684, DOI 10.1001/jama.2010.1500
   Cittelly DM, 2013, ONCOGENE, V32, P2555, DOI 10.1038/onc.2012.275
   Clemm DL, 2000, MOL ENDOCRINOL, V14, P52, DOI 10.1210/me.14.1.52
   Daniel AR, 2010, MOL ENDOCRINOL, V24, P2126, DOI 10.1210/me.2010-0170
   Dong X, 2004, J MOL ENDOCRINOL, V32, P843, DOI 10.1677/jme.0.0320843
   Duplessis TT, 2011, ENDOCRINOLOGY, V152, P2517, DOI 10.1210/en.2010-1281
   Faivre EJ, 2008, MOL ENDOCRINOL, V22, P823, DOI 10.1210/me.2007-0437
   Gan CS, 2008, J PROTEOME RES, V7, P4869, DOI 10.1021/pr800473j
   Goldhar AS, 2011, MOL CELL ENDOCRINOL, V335, P148, DOI 10.1016/j.mce.2011.01.004
   Graham JD, 2005, MOL ENDOCRINOL, V19, P2713, DOI 10.1210/me.2005-0126
   Hao PL, 2010, J PROTEOME RES, V9, P3520, DOI 10.1021/pr100037h
   Hopp TA, 2004, CLIN CANCER RES, V10, P2751, DOI 10.1158/1078-0432.CCR-03-0141
   HORLEIN AJ, 1995, NATURE, V377, P397, DOI 10.1038/377397a0
   Horwitz KB, 2008, J CLIN ENDOCR METAB, V93, P3295, DOI 10.1210/jc.2008-0938
   Horwitzt KB, 2008, P NATL ACAD SCI USA, V105, P5774, DOI 10.1073/pnas.0706216105
   Huq MDM, 2006, EMBO J, V25, P5094, DOI 10.1038/sj.emboj.7601389
   Ko S, 2011, MOL ENDOCRINOL, V25, P433, DOI 10.1210/me.2010-0482
   Konno T, 2010, ENDOCRINOLOGY, V151, P4537, DOI 10.1210/en.2010-0440
   Krcmery J, 2010, BIOESSAYS, V32, P100, DOI 10.1002/bies.200900148
   KYTE J, 1982, J MOL BIOL, V157, P105, DOI 10.1016/0022-2836(82)90515-0
   Lange CA, 2008, J STEROID BIOCHEM, V108, P203, DOI 10.1016/j.jsbmb.2007.09.019
   Le Romancer M, 2008, MOL CELL, V31, P212, DOI 10.1016/j.molcel.2008.05.025
   Le Romancer M, 2011, ENDOCR REV, V32, P597, DOI 10.1210/er.2010-0016
   Leo JCL, 2005, INT J CANCER, V117, P561, DOI 10.1002/ijc.21186
   Leo JCL, 2008, INT J CANCER, V122, P230, DOI 10.1002/ijc.23081
   Lin VCL, 2000, MOL ENDOCRINOL, V14, P348, DOI 10.1210/me.14.3.348
   Lin VCL, 1999, CLIN CANCER RES, V5, P395
   Liu YY, 2012, J BIOL CHEM, V287, P36499, DOI 10.1074/jbc.M112.344317
   Madauss KP, 2007, MOL ENDOCRINOL, V21, P1066, DOI 10.1210/me.2006-0524
   Magklara A, 2009, MOL ENDOCRINOL, V23, P61, DOI 10.1210/me.2008-0028
   Malinowski M, 2012, PLOS ONE, V7, DOI 10.1371/journal.pone.0050709
   Matsuzaki H, 2005, P NATL ACAD SCI USA, V102, P11278, DOI 10.1073/pnas.0502738102
   McKay LI, 1998, MOL ENDOCRINOL, V12, P45, DOI 10.1210/mend.12.1.0044
   Merot Y, 2004, J BIOL CHEM, V279, P26184, DOI 10.1074/jbc.M402148200
   MEYER ME, 1990, EMBO J, V9, P3923, DOI 10.1002/j.1460-2075.1990.tb07613.x
   MEYER ME, 1992, J BIOL CHEM, V267, P10882
   Nasabzadeh TJ, 2010, J CUTAN PATHOL, V37, P1164, DOI 10.1111/j.1600-0560.2010.01607.x
   Obr AE, 2012, MOL CELL ENDOCRINOL, V357, P4, DOI 10.1016/j.mce.2011.10.030
   Ohno K, 2009, J NEUROCHEM, V111, P790, DOI 10.1111/j.1471-4159.2009.06370.x
   Onate SA, 1998, J BIOL CHEM, V273, P12101, DOI 10.1074/jbc.273.20.12101
   Perissi V, 2010, NAT REV GENET, V11, P109, DOI 10.1038/nrg2736
   Pierson-Mullany LK, 2004, MOL CELL BIOL, V24, P10542, DOI 10.1128/MCB.24.24.10542-10557.2004
   Rossouw JE, 2002, JAMA-J AM MED ASSOC, V288, P321, DOI 10.1001/jama.288.3.321
   SARTORIUS CA, 1994, MOL ENDOCRINOL, V8, P1347, DOI 10.1210/me.8.10.1347
   Sims RJ, 2008, NAT REV MOL CELL BIO, V9, P815, DOI 10.1038/nrm2502
   Song LN, 2001, J BIOL CHEM, V276, P24806, DOI 10.1074/jbc.M102610200
   Staka CM, 2005, ENDOCR-RELAT CANCER, V12, pS85, DOI 10.1677/erc.1.01006
   Subramanian K, 2008, MOL CELL, V30, P336, DOI 10.1016/j.molcel.2008.03.022
   Subtil-Rodriguez A, 2008, MOL CELL BIOL, V28, P3830, DOI 10.1128/MCB.01217-07
   Sumida T, 2004, CANCER RES, V64, P7886, DOI 10.1158/0008-5472.CAN-04-1155
   Thomas RS, 2008, J MOL ENDOCRINOL, V40, P173, DOI 10.1677/JME-07-0165
   Tung L, 2006, MOL ENDOCRINOL, V20, P2656, DOI 10.1210/me.2006-0105
   TZUKERMAN MT, 1994, MOL ENDOCRINOL, V8, P21, DOI 10.1210/me.8.1.21
   Wang DQ, 2005, MOL ENDOCRINOL, V19, P1483, DOI 10.1210/me.2005-0012
   Warnmark A, 2003, MOL ENDOCRINOL, V17, P1901, DOI 10.1210/me.2002-0384
   Weigel NL, 2007, MOL ENDOCRINOL, V21, P2311, DOI 10.1210/me.2007-0101
   Xu JM, 1998, SCIENCE, V279, P1922, DOI 10.1126/science.279.5358.1922
   Zhang X, 1998, MOL ENDOCRINOL, V12, P513, DOI 10.1210/me.12.4.513
   Zheng ZY, 2008, BREAST CANCER RES TR, V110, P111, DOI 10.1007/s10549-007-9711-8
   Zuo LA, 2010, BREAST CANCER RES, V12, DOI 10.1186/bcr2588
   Zwart W, 2007, EMBO J, V26, P3534, DOI 10.1038/sj.emboj.7601791
NR 80
TC 15
Z9 16
U1 0
U2 5
PU AMER SOC BIOCHEMISTRY MOLECULAR BIOLOGY INC
PI BETHESDA
PA 9650 ROCKVILLE PIKE, BETHESDA, MD 20814-3996 USA
EI 1083-351X
J9 J BIOL CHEM
JI J. Biol. Chem.
PD FEB 28
PY 2014
VL 289
IS 9
BP 5704
EP 5722
DI 10.1074/jbc.M113.522839
PG 19
WC Biochemistry & Molecular Biology
WE Science Citation Index Expanded (SCI-EXPANDED)
SC Biochemistry & Molecular Biology
GA AB8BQ
UT WOS:000332015500032
PM 24415758
OA hybrid, Green Published
DA 2022-04-10
ER

PT J
AU Coon, TA
   Glasser, JR
   Mallampalli, RK
   Chen, BB
AF Coon, Tiffany A.
   Glasser, Jennifer R.
   Mallampalli, Rama K.
   Chen, Bill B.
TI Novel E3 ligase component FBXL7 ubiquitinates and degrades Aurora A,
   causing mitotic arrest
SO CELL CYCLE
LA English
DT Article
DE F-box protein; centrosome; mitosis; Aurora A
ID SPINDLE ASSEMBLY CHECKPOINT; F-BOX; REGULATORY ENZYME; B DEGRADATION;
   IDENTIFICATION; CANCER; INHIBITOR; PROTEIN; MITOSIS; CYTOKINESIS
AB Aurora family kinases play pivotal roles in several steps during mitosis. Specifically, Aurora A kinase is an important regulator of bipolar mitotic spindle formation and chromosome segregation. Like other members of the Aurora family, Aurora A kinase is also regulated by post-translational modification. Here, we show that a previously undescribed E3 ligase component belonging to the SCF (Skp-Cullin1-F-box protein) E3 ligase family, SCFFBXL7, impairs cell proliferation by mediating Aurora A polyubiquitination and degradation. Both Aurora A and FBXL7 co-localize within the centrosome during spindle formation. FBXL7 ectopic expression led to G(2)/M phase arrest in transformed epithelia, resulting in the appearance of tetraploidy and mitotic arrest with circular monopolar spindles and multipolar spindle formation. Interestingly, FBXL7 specifically interacts with Aurora A during mitosis but not in interphase, suggesting a regulatory role for FBXL7 in controlling Aurora A abundance during mitosis.
C1 [Coon, Tiffany A.; Glasser, Jennifer R.; Mallampalli, Rama K.; Chen, Bill B.] Univ Pittsburgh, Dept Med, Acute Lung Injury Ctr Excellence, Pittsburgh, PA 15260 USA.
   [Mallampalli, Rama K.] Univ Pittsburgh, Dept Cell Biol & Physiol, Pittsburgh, PA USA.
   [Mallampalli, Rama K.] Vet Affairs Pittsburgh Healthcare Syst, Med Specialty Serv Line, Pittsburgh, PA USA.
RP Chen, BB (corresponding author), Univ Pittsburgh, Dept Med, Acute Lung Injury Ctr Excellence, Pittsburgh, PA 15260 USA.
EM chenb@upmc.edu
FU US Department of Veterans Affairs, Veterans Health Administration,
   Office of Research and Development, Biomedical Laboratory Research and
   DevelopmentUS Department of Veterans Affairs; US Department of Veterans
   AffairsUS Department of Veterans Affairs; National Institutes of
   HealthUnited States Department of Health & Human ServicesNational
   Institutes of Health (NIH) - USA [HL096376, HL097376, HL098174];
   NATIONAL HEART, LUNG, AND BLOOD INSTITUTEUnited States Department of
   Health & Human ServicesNational Institutes of Health (NIH) - USANIH
   National Heart Lung & Blood Institute (NHLBI) [R01HL098174, R01HL096376,
   R01HL097376] Funding Source: NIH RePORTER; Veterans AffairsUS Department
   of Veterans Affairs [I01BX002200] Funding Source: NIH RePORTER
FX This material is based upon work supported, in part, by the US
   Department of Veterans Affairs, Veterans Health Administration, Office
   of Research and Development, Biomedical Laboratory Research and
   Development. This work was supported by a Merit Review Award from the US
   Department of Veterans Affairs and National Institutes of Health R01
   grants HL096376, HL097376 and HL098174 (to R.K.M.). The contents
   presented do not represent the views of the Department of Veterans
   Affairs or the United States Government.
CR Agassandian M, 2010, FASEB J, V24, P1271, DOI 10.1096/fj.09-136044
   Cardozo T, 2004, NAT REV MOL CELL BIO, V5, P739, DOI 10.1038/nrm1471
   Carmena M, 2003, NAT REV MOL CELL BIO, V4, P842, DOI 10.1038/nrm1245
   Cenciarelli C, 1999, CURR BIOL, V9, P1177, DOI 10.1016/S0960-9822(00)80020-2
   Chen BB, 2007, J BIOL CHEM, V282, DOI 10.1074/jbc.M706472200
   Chen BB, 2011, CELL CYCLE, V10, P3487, DOI 10.4161/cc.10.20.17742
   Chen BB, 2009, MOL CELL BIOL, V29, P3062, DOI 10.1128/MCB.01824-08
   Cimini D, 2006, CURR BIOL, V16, P1711, DOI 10.1016/j.cub.2006.07.022
   Crane R, 2004, BIOL CELL, V96, P215, DOI 10.1016/j.biolcel.2003.09.008
   D'Angiolella V, 2010, NATURE, V466, P138, DOI 10.1038/nature09140
   Fujiwara T, 2005, NATURE, V437, P1043, DOI 10.1038/nature04217
   Giet R, 2005, TRENDS CELL BIOL, V15, P241, DOI 10.1016/j.tcb.2005.03.004
   Giet R, 1999, J CELL SCI, V112, P3591
   Gortchakov AA, 2005, CHROMOSOMA, V114, P54, DOI 10.1007/s00412-005-0339-3
   Guardavaccaro D, 2008, NATURE, V452, P365, DOI 10.1038/nature06641
   Gusti A, 2009, PLOS ONE, V4, DOI 10.1371/journal.pone.0004780
   Ho CC, 2010, ONCOTARGET, V1, P583
   Hoar K, 2007, MOL CELL BIOL, V27, P4513, DOI 10.1128/MCB.02364-06
   Ilyin GP, 1999, FEBS LETT, V459, P75, DOI 10.1016/S0014-5793(99)01211-9
   Jiang Y, 2003, ONCOGENE, V22, P8293, DOI 10.1038/sj.onc.1206873
   Littlepage LE, 2002, GENE DEV, V16, P2274, DOI 10.1101/gad.1007302
   Long ZJ, 2008, CELL CYCLE, V7, P1473, DOI 10.4161/cc.7.10.5949
   Lu LY, 2008, J BIOL CHEM, V283, P31785, DOI 10.1074/jbc.M805880200
   Maerki S, 2010, CELL CYCLE, V9, P2921, DOI 10.4161/cc.9.15.12740
   Maerki S, 2009, J CELL BIOL, V187, P791, DOI 10.1083/jcb.200906117
   Margolis RL, 2005, CANCER CELL, V8, P353, DOI 10.1016/j.ccr.2005.10.017
   Nguyen HG, 2005, MOL CELL BIOL, V25, P4977, DOI 10.1128/MCB.25.12.4977-4992.2005
   Puklowski A, 2011, NAT CELL BIOL, V13, P1004, DOI 10.1038/ncb2282
   Rao B, 2010, ONCOTARGET, V1, P639
   Ray NB, 2010, NAT MED, V16, P1120, DOI 10.1038/nm.2213
   Ryser S, 2009, CANCER RES, V69, P1125, DOI 10.1158/0008-5472.CAN-08-2134
   Seki A, 2008, J CELL BIOL, V181, P65, DOI 10.1083/jcb.200712027
   Skaar JR, 2009, CELL, V137, DOI 10.1016/j.cell.2009.05.039
   Sumara I, 2007, CELL CYCLE, V6, P3004, DOI 10.4161/cc.6.24.5068
   Sumara I, 2007, DEV CELL, V12, P887, DOI 10.1016/j.devcel.2007.03.019
   Tao Y, 2008, ONCOGENE, V27, P3244, DOI 10.1038/sj.onc.1210990
   Tyler RK, 2007, CELL CYCLE, V6, P2846, DOI 10.4161/cc.6.22.4940
   Vazquez-Martin A, 2009, CELL CYCLE, V8, P2385, DOI 10.4161/cc.8.15.9082
   Visconti R, 2010, CELL CYCLE, V9, P564, DOI 10.4161/cc.9.3.10581
   Zheng N, 2002, NATURE, V416, P703, DOI 10.1038/416703a
NR 40
TC 40
Z9 43
U1 1
U2 8
PU TAYLOR & FRANCIS INC
PI PHILADELPHIA
PA 530 WALNUT STREET, STE 850, PHILADELPHIA, PA 19106 USA
SN 1538-4101
EI 1551-4005
J9 CELL CYCLE
JI Cell Cycle
PD FEB 15
PY 2012
VL 11
IS 4
BP 721
EP 729
DI 10.4161/cc.11.4.19171
PG 9
WC Cell Biology
WE Science Citation Index Expanded (SCI-EXPANDED)
SC Cell Biology
GA 897CY
UT WOS:000300621400022
PM 22306998
OA Green Published, Bronze
DA 2022-04-10
ER

PT J
AU Malyarenko, DI
   Cooke, WE
   Tracy, ER
   Drake, RR
   Shin, S
   Semmes, OJ
   Sasinowski, M
   Manos, DM
AF Malyarenko, Dariya I.
   Cooke, William E.
   Tracy, Eugene R.
   Drake, Richard R.
   Shin, Susanna
   Semmes, O. John
   Sasinowski, Maciek
   Manos, Dennis M.
TI Resampling and deconvolution of linear time-of-flight records for
   enhanced protein profiling
SO RAPID COMMUNICATIONS IN MASS SPECTROMETRY
LA English
DT Article
ID DESORPTION/IONIZATION mass spectrometry; LASER-DESORPTION IONIZATION;
   SPECTRA; RESOLUTION; CANCER
AB We have developed a peak deconvolution strategy that is applicable to the full mass range of a time-of-flight (TOF) spectrum. This strategy involves resampling a spectrum to create a time series that has equal peak widths (in time) across the entire spectrum, and then using the deconvolution filters we have previously described. We use this technique to deconvolve the protein mass spectra for blood serum and cell lysates acquired on three separate TOF instruments. Following deconvolution, we resolve spectral structures consistent with expected events such as multiply charged ions, matrix adducts and post-translational protein modifications. The deconvolution procedure produces a 40% improvement in the resolution and enhanced experimental sensitivity over the full length of the linear TOF record, up to m/z 150 000. This approach is particularly appropriate for automated data analysis and peak detection in dense TOF spectra. Copyright (c) 2006 John Wiley & Sons, Ltd.
C1 Coll William & Mary, Dept Phys, Williamsburg, VA 23187 USA.
   Coll William & Mary, Dept Appl Sci, Williamsburg, VA 23187 USA.
   Eastern Virginia Med Sch, Ctr Biomed Proteom, Norfolk, VA 23501 USA.
   Eastern Virginia Med Sch, Dept Microbiol & Mol Cell Biol, Norfolk, VA 23501 USA.
   Eastern Virginia Med Sch, Dept Surg, Norfolk, VA 23501 USA.
   INCOGEN Inc, Williamsburg, VA 23188 USA.
RP Malyarenko, DI (corresponding author), Coll William & Mary, Dept Phys, Williamsburg, VA 23187 USA.
EM dimaly@wm.edu
FU NCI NIH HHSUnited States Department of Health & Human ServicesNational
   Institutes of Health (NIH) - USANIH National Cancer Institute (NCI) [U01
   CA085067, R44 CA101479, CA85067, R43 CA101479, CA101479] Funding Source:
   Medline; NATIONAL CANCER INSTITUTEUnited States Department of Health &
   Human ServicesNational Institutes of Health (NIH) - USANIH National
   Cancer Institute (NCI) [R44CA101479, U01CA085067, R43CA101479] Funding
   Source: NIH RePORTER
CR BROWN RS, 1993, APPL SPECTROSC, V47, P103, DOI 10.1366/0003702934048514
   Cazares LH, 2002, CLIN CANCER RES, V8, P2541
   Cotter R.J, 1997, TIME OF FLIGHT MASS, P326
   DENOYER LK, 1991, AM LAB, V23, P24
   FUNG ET, 2002, COMPUTATIONAL PROT S, V32, P34
   Gras R, 1999, ELECTROPHORESIS, V20, P3535, DOI 10.1002/(SICI)1522-2683(19991201)20:18<3535::AID-ELPS3535>3.3.CO;2-A
   Heikkonen J, 2004, EUR J MASS SPECTROM, V10, P573, DOI 10.1255/ejms.672
   JACKSON RS, 1991, ANAL CHEM, V63, P1557
   Malyarenko DI, 2006, RAPID COMMUN MASS SP, V20, P1661, DOI 10.1002/rcm.2487
   Malyarenko DI, 2005, CLIN CHEM, V51, P65, DOI 10.1373/clinchem.2004.037283
   MARSHALL AG, 1990, FOURIER TRANSFORM NM, P450
   Metodiev MV, 2004, PROTEOMICS, V4, P1433, DOI 10.1002/pmic.200300683
   Morris JS, 2005, BIOINFORMATICS, V21, P1764, DOI 10.1093/bioinformatics/bti254
   Pan S, 2005, MOL CELL PROTEOMICS, V4, P182, DOI 10.1074/mcp.M400161-MCP200
   ROBINSON EA, 1967, STAT COMMUNICATION D, P249
   Semmes OJ, 2005, CLIN CHEM, V51, P102, DOI 10.1373/clinchem.2004.038950
   SENKO MW, 1995, J AM SOC MASS SPECTR, V6, P229, DOI 10.1016/1044-0305(95)00017-8
   Sidransky D, 2003, JNCI-J NATL CANCER I, V95, P1711, DOI 10.1093/jnci/djg099
   Tirumalai RS, 2003, MOL CELL PROTEOMICS, V2, P1096, DOI 10.1074/mcp.M300031-MCP200
   Vestal M, 1998, J AM SOC MASS SPECTR, V9, P892, DOI 10.1016/S1044-0305(98)00069-5
   Watkins LK, 1999, J CHROMATOGR A, V840, P183, DOI 10.1016/S0021-9673(99)00205-8
   Wool A, 2002, PROTEOMICS, V2, P1365, DOI 10.1002/1615-9861(200210)2:10<1365::AID-PROT1365>3.0.CO;2-9
NR 22
TC 9
Z9 9
U1 1
U2 3
PU WILEY
PI HOBOKEN
PA 111 RIVER ST, HOBOKEN 07030-5774, NJ USA
SN 0951-4198
EI 1097-0231
J9 RAPID COMMUN MASS SP
JI Rapid Commun. Mass Spectrom.
PY 2006
VL 20
IS 11
BP 1670
EP 1678
DI 10.1002/rcm.2496
PG 9
WC Biochemical Research Methods; Chemistry, Analytical; Spectroscopy
WE Science Citation Index Expanded (SCI-EXPANDED)
SC Biochemistry & Molecular Biology; Chemistry; Spectroscopy
GA 046OP
UT WOS:000237821200009
PM 16637003
OA Green Accepted
DA 2022-04-10
ER

PT J
AU Pavlou, D
   Kirmizis, A
AF Pavlou, Demetria
   Kirmizis, Antonis
TI Depletion of histone N-terminal-acetyltransferase Naa40 induces
   p53-independent apoptosis in colorectal cancer cells via the
   mitochondrial pathway
SO APOPTOSIS
LA English
DT Article
DE Histone N-terminal acetylation; Naa40; NatD; Apoptosis; Colorectal
   cancer; epigenetic
ID ALPHA-ACETYLTRANSFERASE; post-translational modification;
   SACCHAROMYCES-CEREVISIAE; IN-VIVO; PROTEIN; ACETYLATION; EXPRESSION;
   IDENTIFICATION; KNOCKDOWN; ROLES
AB Protein N-terminal acetylation is an abundant post-translational modification in eukaryotes implicated in various fundamental cellular and biochemical processes. This modification is catalysed by evolutionarily conserved N-terminal acetyltransferases (NATs) whose deregulation has been linked to cancer development and thus, are emerging as useful diagnostic and therapeutic target. Naa40 is a highly selective NAT that acetylates the aminotermini of histones H4 and H2A and acts as a sensor of cell growth in yeast. In the present study, we examine the role of Naa40 in cancer cell survival. We demonstrate that depletion of Naa40 in HCT116 and HT-29 colorectal cancer cells decreases cell survival by enhancing apoptosis, whereas Naa40 reduction in non-cancerous mouse embryonic fibroblasts has no effect on cell viability. Specifically, Naa40 knockdown in colon cancer cells activates the mitochondrial caspase-9-mediated apoptotic cascade. Consistent with this, we show that caspase-9 activation is required for the induced apoptosis because treatment of cells with an irreversible caspase-9 inhibitor impedes apoptosis when Naa40 is depleted. Furthermore, the effect of Naa40-depletion on cell-death is mediated through a p53-independent mechanism since p53-null HCT116 cells still undergo apoptosis upon reduction of the acetyltransferase. Altogether, these findings reveal an anti-apoptotic role for Naa40 and exhibit its potential as a therapeutic target in colorectal cancers.
C1 [Pavlou, Demetria; Kirmizis, Antonis] Univ Cyprus, Dept Biol Sci, CY-1678 Nicosia, Cyprus.
RP Kirmizis, A (corresponding author), Univ Cyprus, Dept Biol Sci, CY-1678 Nicosia, Cyprus.
EM kirmizis@ucy.ac.cy
FU European Research CouncilEuropean Research Council (ERC)European
   Commission [260797]; Cyprus Research Promotion Foundation
   [Health/Bio/0609(BE)/09]
FX This work was supported by Grants from the European Research Council
   (ERC-2010-Stg, N.260797, ChromatinModWeb) and the Cyprus Research
   Promotion Foundation (Health/Bio/0609(BE)/09). The authors are grateful
   to Dr. Bert Vogelstein for providing the HCT116 p53+/+ and HCT116 p53-/-
   cell lines and to Dr. Qiwei Zhai who kindly provided the Naa40 antibody.
CR Aksnes H, 2015, INT REV CEL MOL BIO, V316, P267, DOI 10.1016/bs.ircmb.2015.01.001
   Aksnes H, 2015, CELL REP, V10, P1362, DOI 10.1016/j.celrep.2015.01.053
   Ametzazurra A, 2008, ONCOGENE, V27, P7296, DOI 10.1038/onc.2008.332
   Arnesen T, 2006, ONCOGENE, V25, P4350, DOI 10.1038/sj.onc.1209469
   Arnesen T, 2011, PLOS BIOL, V9, DOI 10.1371/journal.pbio.1001074
   Arnesen T, 2009, P NATL ACAD SCI USA, V106, P8157, DOI 10.1073/pnas.0901931106
   Ashkenazi A, 1998, SCIENCE, V281, P1305, DOI 10.1126/science.281.5381.1305
   Brentnall M, 2013, BMC CELL BIOL, V14, DOI 10.1186/1471-2121-14-32
   BROWN JL, 1976, J BIOL CHEM, V251, P1009
   Bunz F, 1998, SCIENCE, V282, P1497, DOI 10.1126/science.282.5393.1497
   Droin N, 1998, ONCOGENE, V16, P2885, DOI 10.1038/sj.onc.1201821
   Druskovic M, 2006, CROAT MED J, V47, P832
   Drygin D, 2011, CANCER RES, V71, P1418, DOI 10.1158/0008-5472.CAN-10-1728
   Elmore S, 2007, TOXICOL PATHOL, V35, P495, DOI 10.1080/01926230701320337
   Ethier C, 2007, APOPTOSIS, V12, P2037, DOI 10.1007/s10495-007-0127-z
   Fornaro M, 2003, J BIOL CHEM, V278, P50402, DOI 10.1074/jbc.M307627200
   Forte GMA, 2011, PLOS BIOL, V9, DOI 10.1371/journal.pbio.1001073
   Foyn H, 2013, ACS CHEM BIOL, V8, P1121, DOI 10.1021/cb400136s
   Gromyko D, 2010, INT J CANCER, V127, P2777, DOI 10.1002/ijc.25275
   Hanahan D, 2011, CELL, V144, P646, DOI 10.1016/j.cell.2011.02.013
   HARASAWA R, 1993, RES MICROBIOL, V144, P489, DOI 10.1016/0923-2508(93)90057-9
   He XX, 2015, ONCOTARGET, V6, P2034, DOI 10.18632/oncotarget.2988
   HERSHKO A, 1984, P NATL ACAD SCI-BIOL, V81, P7021, DOI 10.1073/pnas.81.22.7021
   Hole K, 2011, PLOS ONE, V6, DOI 10.1371/journal.pone.0024713
   Hollebeke J, 2012, BIOL CHEM, V393, P291, DOI 10.1515/hsz-2011-0228
   Hua KT, 2011, CANCER CELL, V19, P218, DOI 10.1016/j.ccr.2010.11.010
   Hwang CS, 2010, SCIENCE, V327, P973, DOI 10.1126/science.1183147
   JORNVALL H, 1975, J THEOR BIOL, V55, P1, DOI 10.1016/S0022-5193(75)80105-6
   Kalvik TV, 2013, ONCOGENE, V32, P269, DOI 10.1038/onc.2012.82
   Koff JL, 2015, INT J MOL SCI, V16, P2942, DOI 10.3390/ijms16022942
   Kouzarides T, 2007, CELL, V128, P693, DOI 10.1016/j.cell.2007.02.005
   Lee CF, 2010, J CLIN INVEST, V120, P2920, DOI 10.1172/JCI42275
   Liu Y, 2006, P NATL ACAD SCI USA, V103, P976, DOI 10.1073/pnas.0510146103
   Liu Z, 2009, INT J BIOCHEM CELL B, V41, P2528, DOI 10.1016/j.biocel.2009.08.009
   Lopez J, 2015, BRIT J CANCER, V112, P957, DOI 10.1038/bjc.2015.85
   Magin RS, 2015, STRUCTURE, V23, P332, DOI 10.1016/j.str.2014.10.025
   McIlwain DR, 2013, CSH PERSPECT BIOL, V5, DOI 10.1101/cshperspect.a008656
   Norbury CJ, 2001, ANNU REV PHARMACOL, V41, P367, DOI 10.1146/annurev.pharmtox.41.1.367
   OLTVAI ZN, 1993, CELL, V74, P609, DOI 10.1016/0092-8674(93)90509-O
   Park SE, 2015, SCIENCE, V347, P1249, DOI 10.1126/science.aaa3844
   Parrish Amanda B, 2013, Cold Spring Harb Perspect Biol, V5, DOI 10.1101/cshperspect.a008672
   Polevoda B, 1999, EMBO J, V18, P6155, DOI 10.1093/emboj/18.21.6155
   Polevoda B, 2008, J CELL BIOCHEM, V103, P492, DOI 10.1002/jcb.21418
   Polevoda Bogdan, 2009, BMC Proc, V3 Suppl 6, pS2, DOI 10.1186/1753-6561-3-S6-S2
   Polevoda B, 2009, MOL CELL BIOL, V29, P2913, DOI 10.1128/MCB.00147-08
   Ree R, 2015, BIOSCIENCE REP, V35, DOI 10.1042/BSR20150168
   Ren TT, 2008, CANCER LETT, V264, P83, DOI 10.1016/j.canlet.2008.01.028
   Riesen M, 2009, AGING CELL, V8, P624, DOI 10.1111/j.1474-9726.2009.00514.x
   Sabbagh L, 2004, J IMMUNOL, V173, P5425, DOI 10.4049/jimmunol.173.9.5425
   Sarosiek KA, 2013, TRENDS CELL BIOL, V23, P612, DOI 10.1016/j.tcb.2013.08.003
   Schiza V, 2013, PLOS GENET, V9, DOI 10.1371/journal.pgen.1003805
   Seo J, 2004, J BIOCHEM MOL BIOL, V37, P35
   Silva RD, 2015, PROTEOMICS, V15, P2402, DOI 10.1002/pmic.201400631
   Smith DL, 2009, AGING CELL, V8, P633, DOI 10.1111/j.1474-9726.2009.00516.x
   Song OK, 2003, J BIOL CHEM, V278, P38109, DOI 10.1074/jbc.C300355200
   Sousa FG, 2012, CARCINOGENESIS, V33, P1433, DOI 10.1093/carcin/bgs132
   Starheim KK, 2008, BIOCHEM J, V415, P325, DOI 10.1042/BJ20080658
   Starheim KK, 2012, TRENDS BIOCHEM SCI, V37, P152, DOI 10.1016/j.tibs.2012.02.003
   Starheim KK, 2009, MOL CELL BIOL, V29, P3569, DOI 10.1128/MCB.01909-08
   Tooley JG, 2014, PROTEIN SCI, V23, P1641, DOI 10.1002/pro.2547
   Tweedie-Cullen RY, 2012, PLOS ONE, V7, DOI 10.1371/journal.pone.0036980
   Van Damme P, 2014, MOL CELL PROTEOMICS, V13, P2031, DOI 10.1074/mcp.M113.035402
   Wu D, 2005, J AM SOC NEPHROL, V16, P646, DOI 10.1681/ASN.2004060445
   YangLiu, 2012, J LIPID RES, V53, P358, DOI 10.1194/jlr.M019257
   Yu M, 2009, CANCER INVEST, V27, P978, DOI 10.3109/07357900902769723
NR 65
TC 25
Z9 29
U1 0
U2 15
PU SPRINGER
PI DORDRECHT
PA VAN GODEWIJCKSTRAAT 30, 3311 GZ DORDRECHT, NETHERLANDS
SN 1360-8185
EI 1573-675X
J9 APOPTOSIS
JI Apoptosis
PD MAR
PY 2016
VL 21
IS 3
BP 298
EP 311
DI 10.1007/s10495-015-1207-0
PG 14
WC Biochemistry & Molecular Biology; Cell Biology
WE Science Citation Index Expanded (SCI-EXPANDED)
SC Biochemistry & Molecular Biology; Cell Biology
GA DF3IO
UT WOS:000371237700005
PM 26666750
OA hybrid, Green Published
DA 2022-04-10
ER

PT J
AU Heinonen, M
   Milliat, F
   Benadjaoud, MA
   Francois, A
   Buard, V
   Tarlet, G
   d'Alche-Buc, F
   Guipaud, O
AF Heinonen, Markus
   Milliat, Fabien
   Benadjaoud, Mohamed Amine
   Francois, Agnes
   Buard, Valerie
   Tarlet, Georges
   d'Alche-Buc, Florence
   Guipaud, Olivier
TI Temporal clustering analysis of endothelial cell gene expression
   following exposure to a conventional radiotherapy dose fraction using
   Gaussian process clustering
SO PLOS ONE
LA English
DT Article
ID IONIZING-RADIATION; NORMAL TISSUE; TIME-SERIES; COEFFICIENT
AB The vascular endothelium is considered as a key cell compartment for the response to ionizing radiation of normal tissues and tumors, and as a promising target to improve the differential effect of radiotherapy in the future. Following radiation exposure, the global endothelial cell response covers a wide range of gene, miRNA, protein and metabolite expression modifications. Changes occur at the transcriptional, translational and post-translational levels and impact cell phenotype as well as the microenvironment by the production and secretion of soluble factors such as reactive oxygen species, chemokines, cytokines and growth factors. These radiation-induced dynamic modifications of molecular networks may control the endothelial cell phenotype and govern recruitment of immune cells, stressing the importance of clearly understanding the mechanism which underlie these temporal processes. A wide variety of time series data is commonly used in bioinformatics studies, including gene expression, protein concentrations and metabolomics data. The use of clustering of these data is still an unclear problem. Here, we introduce kernels between Gaussian processes modeling time series, and subsequently introduce a spectral clustering algorithm. We apply the methods to the study of human primary endothelial cells (HUVECs) exposed to a radiotherapy dose fraction (2 Gy). Time windows of differential expressions of 301 genes involved in key cellular processes such as angiogenesis, inflammation, apoptosis, immune response and protein kinase were determined from 12 hours to 3 weeks post-irradiation. Then, 43 temporal clusters corresponding to profiles of similar expressions, including 49 genes out of 301 initially measured, were generated according to the proposed method. Forty-seven transcription factor (TFs) responsible for the expression of clusters of genes were predicted from sequence regulatory elements using the MotifMap system. Their temporal profiles of occurrences were established and clustered. Dynamic network interactions and molecular pathway of TFs and differential genes were finally explored, revealing key node genes and putative important cellular processes involved in tissue infiltration by immune cells following exposure to a radiotherapy dose fraction.
C1 [Heinonen, Markus] Aalto Univ, Dept Informat & Comp Sci, Aalto, Finland.
   [Milliat, Fabien; Francois, Agnes; Buard, Valerie; Tarlet, Georges; Guipaud, Olivier] Inst Radiol Protect & Nucl Safety IRSN, PSE SANTE, SERAMED, LRMed, Fontenay Aux Roses, France.
   [Benadjaoud, Mohamed Amine] Inst Radiol Protect & Nucl Safety IRSN, PSE SANTE, SERAMED, Fontenay Aux Roses, France.
   [d'Alche-Buc, Florence] Univ Paris Saclay, LTCI, Telecom ParisTech, Paris, France.
RP Guipaud, O (corresponding author), Inst Radiol Protect & Nucl Safety IRSN, PSE SANTE, SERAMED, LRMed, Fontenay Aux Roses, France.
EM olivier.guipaud@irsn.fr
OI TARLET, Georges/0000-0002-4756-5127; Milliat, Fabien/0000-0001-8249-9498
FU Electricite de France (Groupe Gestion Projet Radioprotection); Institut
   de Radioprotection et de Surete Nucleaire (programme ROSIRIS)
FX This work has been supported by Electricite de France (Groupe Gestion
   Projet Radioprotection) and Institut de Radioprotection et de Surete
   Nucleaire (programme ROSIRIS). The funders had no role in study design,
   data collection and analysis, decision to publish, or preparation of the
   manuscript.
CR Aijo T, 2009, BIOINFORMATICS, V25, P2937, DOI 10.1093/bioinformatics/btp511
   Angelini C, 2007, STAT APPL GENET MOL, V6
   Bach FR, 2004, ADV NEUR IN, V16, P305
   Bar-Joseph Z, 2004, BIOINFORMATICS, V20, P2493, DOI 10.1093/bioinformatics/bth283
   Borghini A, 2013, ATHEROSCLEROSIS, V230, P40, DOI 10.1016/j.atherosclerosis.2013.06.010
   Caldas J, 2009, BIOINFORMATICS, V25, pI145, DOI 10.1093/bioinformatics/btp215
   Chawla S, 2013, P 2013 SIAM INT C DA
   Cheng JD, 2002, BIOCHEM BIOPH RES CO, V297, P1128, DOI 10.1016/S0006-291X(02)02301-X
   Chung AS, 2010, NAT REV CANCER, V10, P505, DOI 10.1038/nrc2868
   Conesa A, 2006, BIOINFORMATICS, V22, P1096, DOI 10.1093/bioinformatics/btl056
   Cooke EJ, 2011, BMC BIOINFORMATICS, V12, DOI 10.1186/1471-2105-12-399
   Corre I, 2013, INT J MOL SCI, V14, P22678, DOI 10.3390/ijms141122678
   Criswell T, 2003, ONCOGENE, V22, P5813, DOI 10.1038/sj.onc.1206680
   Daily K, 2011, BMC BIOINFORMATICS, V12, DOI 10.1186/1471-2105-12-495
   Dent P, 2003, RADIAT RES, V159, P283, DOI 10.1667/0033-7587(2003)159[0283:SARIAO]2.0.CO;2
   DeVita VT, 2011, ROSENBERGS CANC PRIN
   Dudoit S, 2002, STAT SINICA, V12, P111
   Duong T, 2011, KS KERNEL SMOOTHING
   Fei PW, 2003, ONCOGENE, V22, P5774, DOI 10.1038/sj.onc.1206677
   Gao P, 2008, BIOINFORMATICS, V24, pI70, DOI 10.1093/bioinformatics/btn278
   Guipaud O, 2018, BRIT J RADIOL, V91, DOI 10.1259/bjr.20170762
   Heinonen M, 2015, BIOINFORMATICS, V31, P728, DOI 10.1093/bioinformatics/btu699
   Hensman J, 2013, BMC BIOINFORMATICS, V14, DOI 10.1186/1471-2105-14-252
   Holsclaw T, 2013, TECHNOMETRICS, V55, P57, DOI 10.1080/00401706.2012.723918
   INMAN HF, 1989, COMMUN STAT THEORY, V18, P3851, DOI 10.1080/03610928908830127
   Jaakkola T, 1999, Proc Int Conf Intell Syst Mol Biol, P149
   Jebara T, 2004, J MACH LEARN RES, V5, P819
   Jebara T, 2003, LECT NOTES ARTIF INT, V2777, P57, DOI 10.1007/978-3-540-45167-9_6
   Kalaitzis AA, 2011, BMC BIOINFORMATICS, V12, DOI 10.1186/1471-2105-12-180
   Karhunen K., 1947, ANN ACAD SCI FENN-M, P1
   Kim J, 2013, BMC BIOINFORMATICS, V14, DOI 10.1186/1471-2105-14-310
   Kirk PDW, 2009, BIOINFORMATICS, V25, P1300, DOI 10.1093/bioinformatics/btp139
   Laube M, 2016, ANTIOXIDANTS-BASEL, V5, DOI 10.3390/antiox5020014
   Lawrence N. D., 2007, ADV NEURAL INFORM PR, V19, P785
   LEE YJ, 1995, J BIOL CHEM, V270, P28790, DOI 10.1074/jbc.270.48.28790
   Liauw SL, 2013, SCI TRANSL MED, V5, DOI 10.1126/scitranslmed.3005148
   Mestdagh P, 2009, GENOME BIOL, V10, DOI 10.1186/gb-2009-10-6-r64
   Moding EJ, 2013, NAT REV DRUG DISCOV, V12, P526, DOI 10.1038/nrd4003
   Moreno PJ, 2004, ADV NEUR IN, V16, P1385
   Nikitin A, 2003, BIOINFORMATICS, V19, P2155, DOI 10.1093/bioinformatics/btg290
   Potters L, 2010, INT J RADIAT ONCOL, V76, P326, DOI 10.1016/j.ijrobp.2009.09.042
   Ramsay JO., 2005, FUNCTIONAL DATA ANAL
   Rannou E, 2015, SCI REP-UK, V5, DOI 10.1038/srep15738
   Rasmussen CE, 2003, BAYESIAN STATISTICS 7, P651
   Rasmussen CE, 2005, ADAPT COMPUT MACH LE, P1
   Riihimaki J., 2010, JMLR WORKSH C P, V9, P645
   Schliep A, 2005, IEEE ACM T COMPUT BI, V2, P179, DOI 10.1109/TCBB.2005.31
   Schmid F, 2006, COMPUT STAT DATA AN, V50, P1583, DOI 10.1016/j.csda.2005.01.014
   Simone CB, 2013, CHEST, V143, P1784, DOI 10.1378/chest.12-2580
   Snyder AR, 2004, CANCER METAST REV, V23, P259, DOI 10.1023/B:CANC.0000031765.17886.fa
   Solak E., 2002, P ADV NEUR INF PROC, P1033
   Stegle O, 2010, J COMPUT BIOL, V17, P355, DOI 10.1089/cmb.2009.0175
   Stone HB, 2003, LANCET ONCOL, V4, P529, DOI 10.1016/S1470-2045(03)01191-4
   Storey JD, 2005, P NATL ACAD SCI USA, V102, P12837, DOI 10.1073/pnas.0504609102
   Tamm I, 1998, CANCER RES, V58, P5315
   Valerie K, 2007, MOL CANCER THER, V6, P789, DOI 10.1158/1535-7163.MCT-06-0596
   von Luxburg U, 2007, STAT COMPUT, V17, P395, DOI 10.1007/s11222-007-9033-z
   Weitzman M.S., 1970, MEASURES OVERLAP INC
   Xie XH, 2009, BIOINFORMATICS, V25, P167, DOI 10.1093/bioinformatics/btn605
   Yang C, 2011, PLOS ONE, V6, DOI 10.1371/journal.pone.0016229
   Yao F., 2015, PACE PACKAGE FUNCTIO
   Yuan M, 2006, COMPUT STAT DATA AN, V51, P1754, DOI 10.1016/j.csda.2005.11.017
NR 62
TC 3
Z9 3
U1 0
U2 2
PU PUBLIC LIBRARY SCIENCE
PI SAN FRANCISCO
PA 1160 BATTERY STREET, STE 100, SAN FRANCISCO, CA 94111 USA
SN 1932-6203
J9 PLOS ONE
JI PLoS One
PD OCT 3
PY 2018
VL 13
IS 10
AR e0204960
DI 10.1371/journal.pone.0204960
PG 31
WC Multidisciplinary Sciences
WE Science Citation Index Expanded (SCI-EXPANDED)
SC Science & Technology - Other Topics
GA GV7VQ
UT WOS:000446342400072
PM 30281653
OA Green Submitted, Green Published, gold
DA 2022-04-10
ER

PT J
AU Talwar, S
   Jin, JF
   Carroll, B
   Liu, AG
   Gillespie, MB
   Palanisamy, V
AF Talwar, Sudha
   Jin, Junfei
   Carroll, Brittany
   Liu, Angen
   Gillespie, Marion Boyd
   Palanisamy, Viswanathan
TI Caspase-mediated Cleavage of RNA-binding Protein HuR Regulates c-Myc
   Protein Expression after Hypoxic Stress
SO JOURNAL OF BIOLOGICAL CHEMISTRY
LA English
DT Article
ID ENDOTHELIAL GROWTH-FACTOR; MESSENGER-RNA; POSTTRANSCRIPTIONAL
   REGULATION; CELL CARCINOMA; TRANSLATION; CANCER; CYTOPLASM;
   PHOSPHORYLATION; STABILIZATION; BIOGENESIS
AB Altered expression of RNA-binding proteins modulates gene expression in association with mRNAs encoding many proto-oncogenes, cytokines, chemokines, and proinflammatory factors. Huantigen R (HuR), a ubiquitously expressed protein, controls a range of cellular functions such as tumor progression, apoptosis, invasion, and metastasis by stabilizing the AU-rich element located at the 3'-untranslated region (UTR) of target mRNAs. Although significant progress has been made in understanding HuR regulation in gene expression, little is known about how HuR undergoes post-translational modification and recruits target mRNAs during hypoxic stress. Here, we report that during CoCl2-induced hypoxic stress, HuR is significantly overexpressed and undergoes caspase-dependent cleavage in head and neck squamous cell carcinoma cells. Unexpectedly, the HuR-cleavage product 1 (HuR-CP1) was found to strongly associate with the 3'-UTR of c-myc mRNA and block mRNA translation. The binding efficiency of HuR to the 3'-UTR of c-myc mRNA was confirmed using ribonucleoprotein immunoprecipitation and site-directed mutagenesis at the AU-rich element sequences of the c-myc mRNA. Overexpression of a non-cleavable isoform, HuR-D226A, revealed a potent dominant-negative effect, repressing cleavage of endogenous HuR and promoting cell viability. Surprisingly, under hypoxia, siRNA knockdown of HuR elevated c-Myc protein expression. These findings suggest an important role for HuR in hypoxia, and we may have revealed a novel post-transcriptional mechanism that controls c-Myc expression in oral cancer progression.
C1 [Talwar, Sudha; Jin, Junfei; Carroll, Brittany; Palanisamy, Viswanathan] Med Univ S Carolina, Coll Dent Med, Dept Craniofacial Biol, Charleston, SC 29425 USA.
   [Liu, Angen] Med Univ S Carolina, Hollings Canc Ctr, Charleston, SC 29425 USA.
   [Gillespie, Marion Boyd] Med Univ S Carolina, Dept Otolaryngol Head & Neck Surg, Charleston, SC 29425 USA.
   [Palanisamy, Viswanathan] Med Univ S Carolina, Dept Biochem & Mol Biol, Charleston, SC 29425 USA.
RP Palanisamy, V (corresponding author), Med Univ S Carolina, Coll Dent Med, Dept Craniofacial Biol, Charleston, SC 29425 USA.
EM visu@musc.edu
OI Jin, Junfei/0000-0002-9237-9024; Palanisamy,
   Viswanathan/0000-0001-5128-2878
FU National Institutes of HealthUnited States Department of Health & Human
   ServicesNational Institutes of Health (NIH) - USA [R00DE018165];
   NATIONAL INSTITUTE OF DENTAL &CRANIOFACIAL RESEARCHUnited States
   Department of Health & Human ServicesNational Institutes of Health (NIH)
   - USANIH National Institute of Dental & Craniofacial Research (NIDCR)
   [R00DE018165] Funding Source: NIH RePORTER
FX This work was supported, in whole or in part, by National Institutes of
   Health Grant R00DE018165 (to V.P.).
CR Abdelmohsen K, 2007, CELL CYCLE, V6, P1288, DOI 10.4161/cc.6.11.4299
   Abdelmohsen K, 2007, MOL CELL, V25, P543, DOI 10.1016/j.molcel.2007.01.011
   Abdelmohsen K, 2009, EMBO J, V28, P1271, DOI 10.1038/emboj.2009.67
   Adhikary S, 2005, NAT REV MOL CELL BIO, V6, P635, DOI 10.1038/nrm1703
   Atasoy U, 1998, J CELL SCI, V111, P3145
   Balasubramanian S, 2010, PLOS ONE, V5, DOI 10.1371/journal.pone.0011470
   Baudino TA, 2002, GENE DEV, V16, P2530, DOI 10.1101/gad.1024602
   Beauchamp P, 2010, CELL DEATH DIFFER, V17, P1588, DOI 10.1038/cdd.2010.34
   BRADFORD MM, 1976, ANAL BIOCHEM, V72, P248, DOI 10.1016/0003-2697(76)90527-3
   Brennan CM, 2000, J CELL BIOL, V151, P1, DOI 10.1083/jcb.151.1.1
   Brunelle JK, 2004, J BIOL CHEM, V279, P4305, DOI 10.1074/jbc.M312241200
   Chen CY, 2001, CELL, V107, P451, DOI 10.1016/S0092-8674(01)00578-5
   Chen JL, 2009, AUTOPHAGY, V5, P244, DOI 10.4161/auto.5.2.7549
   Chung J, 2002, J CELL BIOL, V158, P165, DOI 10.1083/jcb.200112015
   Cole MD, 1999, ONCOGENE, V18, P2916, DOI 10.1038/sj.onc.1202748
   Corn PG, 2005, CANCER BIOL THER, V4, P1285, DOI 10.4161/cbt.4.11.2299
   Costantino CL, 2009, CANCER RES, V69, P4567, DOI 10.1158/0008-5472.CAN-09-0371
   de Silanes IL, 2004, P NATL ACAD SCI USA, V101, P2987, DOI 10.1073/pnas.0306453101
   Doller A, 2007, MOL BIOL CELL, V18, P2137, DOI 10.1091/mbc.E06-09-0850
   EVAN GI, 1992, CELL, V69, P119, DOI 10.1016/0092-8674(92)90123-T
   Fernau NS, 2010, J BIOL CHEM, V285, P3896, DOI 10.1074/jbc.M109.081430
   Galban S, 2008, MOL CELL BIOL, V28, P93, DOI 10.1128/MCB.00973-07
   Gallouzi IE, 2000, P NATL ACAD SCI USA, V97, P3073, DOI 10.1073/pnas.97.7.3073
   Garneau NL, 2007, NAT REV MOL CELL BIO, V8, P113, DOI 10.1038/nrm2104
   Grandori C, 2000, ANNU REV CELL DEV BI, V16, P653, DOI 10.1146/annurev.cellbio.16.1.653
   Hasegawa H, 2009, BRIT J CANCER, V100, P1943, DOI 10.1038/sj.bjc.6605084
   Janssen HL, 2005, HEAD NECK-J SCI SPEC, V27, P622, DOI 10.1002/hed.20223
   Kakuguchi W, 2010, MOL CANCER RES, V8, P520, DOI 10.1158/1541-7786.MCR-09-0367
   Keene JD, 2007, NAT REV GENET, V8, P533, DOI 10.1038/nrg2111
   Kim HH, 2009, GENE DEV, V23, P1743, DOI 10.1101/gad.1812509
   Kim JW, 2007, MOL CELL BIOL, V27, P7381, DOI 10.1128/MCB.00440-07
   Kullmann M, 2002, GENE DEV, V16, P3087, DOI 10.1101/gad.248902
   Kurokawa T, 2003, BRIT J CANCER, V89, P1042, DOI 10.1038/sj.bjc.6601186
   Kuwano Y, 2008, MOL CELL BIOL, V28, P4562, DOI 10.1128/MCB.00165-08
   Lafon I, 1998, ONCOGENE, V16, P3413, DOI 10.1038/sj.onc.1201895
   Lal A, 2005, EMBO J, V24, P1852, DOI 10.1038/sj.emboj.7600661
   Leandersson K, 2006, NUCLEIC ACIDS RES, V34, P3988, DOI 10.1093/nar/gkl571
   Leo C, 2004, SEMIN RADIAT ONCOL, V14, P207, DOI 10.1016/j.semradonc.2004.04.007
   Levy NS, 1998, J BIOL CHEM, V273, P6417, DOI 10.1074/jbc.273.11.6417
   Li HW, 2002, J BIOL CHEM, V277, P44623, DOI 10.1074/jbc.M206187200
   Li Q, 2009, BIOCHIMIE, V91, P1307, DOI 10.1016/j.biochi.2009.07.001
   Masuda K, 2009, J CELL MOL MED, V13, P2759, DOI 10.1111/j.1582-4934.2009.00842.x
   Mazroui R, 2008, J CELL BIOL, V180, P113, DOI 10.1083/jcb.200709030
   Meng Z, 2005, NUCLEIC ACIDS RES, V33, P2962, DOI 10.1093/nar/gki603
   Millard SS, 2000, MOL CELL BIOL, V20, P5947, DOI 10.1128/MCB.20.16.5947-5959.2000
   Osthus RC, 2000, J BIOL CHEM, V275, P21797, DOI 10.1074/jbc.C000023200
   Rankin EB, 2008, CELL DEATH DIFFER, V15, P678, DOI 10.1038/cdd.2008.21
   Siomi H, 2010, MOL CELL, V38, P323, DOI 10.1016/j.molcel.2010.03.013
   VANDELOOSDRECHT AA, 1994, J IMMUNOL METHODS, V174, P311, DOI 10.1016/0022-1759(94)90034-5
   Zhang HF, 2007, CANCER CELL, V11, P407, DOI 10.1016/j.ccr.2007.04.001
NR 50
TC 45
Z9 46
U1 0
U2 5
PU AMER SOC BIOCHEMISTRY MOLECULAR BIOLOGY INC
PI ROCKVILLE
PA 11200 ROCKVILLE PIKE, SUITE 302, ROCKVILLE, MD, UNITED STATES
SN 0021-9258
EI 1083-351X
J9 J BIOL CHEM
JI J. Biol. Chem.
PD SEP 16
PY 2011
VL 286
IS 37
BP 32333
EP 32343
DI 10.1074/jbc.M111.255927
PG 11
WC Biochemistry & Molecular Biology
WE Science Citation Index Expanded (SCI-EXPANDED)
SC Biochemistry & Molecular Biology
GA 818CK
UT WOS:000294726800043
PM 21795698
OA Green Published, hybrid
DA 2022-04-10
ER

PT J
AU Jorgensen, S
   Schotta, G
   Sorensen, CS
AF Jorgensen, Stine
   Schotta, Gunnar
   Sorensen, Claus Storgaard
TI Histone H4 Lysine 20 methylation: key player in epigenetic regulation of
   genomic integrity
SO NUCLEIC ACIDS RESEARCH
LA English
DT Article
ID dna damage; CELL-CYCLE; METHYLTRANSFERASE SET8; TUMOR SUPPRESSION;
   PROTEIN 53BP1; S-PHASE; CHROMATIN; PR-SET7; REPLICATION; CHECKPOINT
AB Maintenance of genomic integrity is essential to ensure normal organismal development and to prevent diseases such as cancer. Nuclear DNA is packaged into chromatin, and thus genome maintenance can be influenced by distinct chromatin environments. In particular, post-translational modification of histones have emerged as key regulators of genomic integrity. Intense research during the past few years has revealed histone H4 lysine 20 methylation (H4K20me) as critically important for the biological processes that ensure genome integrity, such as DNA damage repair, DNA replication and chromatin compaction. The distinct H4K20 methylation states are mediated by SET8/PR-Set7 that catalyses monomethylation of H4K20, whereas SUV4-20H1 and SUV4-20H2 enzymes mediate further H4K20 methylation to H4K20me2 and H4K20me3. Disruption of these H4K20-specific histone methyltransferases leads to genomic instability, demonstrating the important functions of H4K20 methylation in genome maintenance. In this review, we explain molecular mechanism underlying these defects and discuss novel ideas for furthering our understanding of genome maintenance in higher eukaryotes.
C1 [Jorgensen, Stine; Sorensen, Claus Storgaard] Univ Copenhagen, BRIC, DK-2200 Copenhagen N, Denmark.
   [Schotta, Gunnar] Univ Munich, Adolf Butenandt Inst, Munich Ctr Integrated Prot Sci CiPSM, D-80336 Munich, Germany.
RP Sorensen, CS (corresponding author), Univ Copenhagen, BRIC, Ole Maaloes Vej 5, DK-2200 Copenhagen N, Denmark.
EM gunnar.schotta@med.uni-muenchen.de; Claus.storgaard@bric.ku.dk
OI Schotta, Gunnar/0000-0003-4940-6135; Sorensen, Claus/0000-0001-6022-9710
FU LundbeckfoundationLundbeckfonden; Danish Cancer SocietyDanish Cancer
   Society; Danish Medical Research CouncilDanish Medical Research
   CouncilUK Research & Innovation (UKRI)Medical Research Council UK (MRC);
   BMBFFederal Ministry of Education & Research (BMBF);  [SFB-TR5
   Chromatin];  [SFB 684];  [SPP1356]
FX The Lundbeckfoundation, The Danish Cancer Society, and The Danish
   Medical Research Council (to S.J. and C. S. S.); Research in the
   laboratory of G. S. is financed by the BMBF, SFB-TR5 Chromatin, SFB 684
   and SPP1356. Funding for open access charge: Core funding.
CR Abbas T, 2010, MOL CELL, V40, P9, DOI 10.1016/j.molcel.2010.09.014
   Bartke T, 2010, CELL, V143, P470, DOI 10.1016/j.cell.2010.10.012
   Beck DB, 2012, GENE DEV, V26, P2580, DOI 10.1101/gad.195636.112
   Beck DB, 2012, GENE DEV, V26, P325, DOI 10.1101/gad.177444.111
   Beck H, 2012, MOL CELL BIOL, V32, P4226, DOI 10.1128/MCB.00412-12
   Benetti R, 2007, J CELL BIOL, V178, P925, DOI 10.1083/jcb.200703081
   Botuyan MV, 2006, CELL, V127, P1361, DOI 10.1016/j.cell.2006.10.043
   Bouwman P, 2010, NAT STRUCT MOL BIOL, V17, P688, DOI 10.1038/nsmb.1831
   Bunting SF, 2010, CELL, V141, P243, DOI 10.1016/j.cell.2010.03.012
   Centore RC, 2010, MOL CELL, V40, P22, DOI 10.1016/j.molcel.2010.09.015
   Deem AK, 2012, CHROMOSOMA, V121, P131, DOI 10.1007/s00412-011-0358-1
   Dominguez-Kelly R, 2011, J CELL BIOL, V194, P567, DOI 10.1083/jcb.201101047
   Eliezer Y, 2009, J BIOL CHEM, V284, P426, DOI 10.1074/jbc.M807375200
   Fang J, 2002, CURR BIOL, V12, P1086, DOI 10.1016/S0960-9822(02)00924-7
   Fernandez-Capetillo O, 2002, NAT CELL BIOL, V4, P993, DOI 10.1038/ncb884
   Forment JV, 2011, PLOS ONE, V6, DOI 10.1371/journal.pone.0023517
   Gonzalo S, 2005, NAT CELL BIOL, V7, P420, DOI 10.1038/ncb1235
   Gurvich N, 2010, P NATL ACAD SCI USA, V107, P22552, DOI 10.1073/pnas.1017092108
   Hartlerode AJ, 2012, PLOS ONE, V7, DOI 10.1371/journal.pone.0049211
   Houston SI, 2008, J BIOL CHEM, V283, P19478, DOI 10.1074/jbc.M710579200
   Huen MSY, 2008, J BIOL CHEM, V283, P11073, DOI 10.1074/jbc.C700242200
   Jackson SP, 2009, NATURE, V461, P1071, DOI 10.1038/nature08467
   Jorgensen S, 2007, J CELL BIOL, V179, P1337, DOI 10.1083/jcb.200706150
   Jorgensen S, 2011, J CELL BIOL, V192, P43, DOI 10.1083/jcb.201009076
   Julien E, 2004, MOL CELL, V14, P713, DOI 10.1016/j.molcel.2004.06.008
   Kouzarides T, 2007, CELL, V128, P693, DOI 10.1016/j.cell.2007.02.005
   Kuo AJ, 2012, NATURE, V484, P115, DOI 10.1038/nature10956
   Kuo AJ, 2011, MOL CELL, V44, P609, DOI 10.1016/j.molcel.2011.08.042
   Liu W, 2010, NATURE, V466, P508, DOI 10.1038/nature09272
   Lu X, 2008, NAT STRUCT MOL BIOL, V15, P1122, DOI 10.1038/nsmb.1489
   Lukas J, 2011, NAT CELL BIOL, V13, P1161, DOI 10.1038/ncb2344
   Mallette FA, 2012, EMBO J, V31, P1865, DOI 10.1038/emboj.2012.47
   Nishioka K, 2002, MOL CELL, V9, P1201, DOI 10.1016/S1097-2765(02)00548-8
   Oda H, 2010, MOL CELL, V40, P364, DOI 10.1016/j.molcel.2010.10.011
   Oda H, 2009, MOL CELL BIOL, V29, P2278, DOI 10.1128/MCB.01768-08
   Pei HD, 2011, NATURE, V470, P124, DOI 10.1038/nature09658
   Pesavento JJ, 2008, MOL CELL BIOL, V28, P468, DOI 10.1128/MCB.01517-07
   Qi HH, 2010, NATURE, V466, P503, DOI 10.1038/nature09261
   Qin JZ, 2010, J BIOL CHEM, V285, P27767, DOI 10.1074/jbc.M110.115410
   Regha K, 2007, MOL CELL, V27, P353, DOI 10.1016/j.molcel.2007.06.024
   Sakaguchi A, 2007, J CELL BIOL, V176, P155, DOI 10.1083/jcb.200607178
   Sanders SL, 2004, CELL, V119, P603, DOI 10.1016/j.cell.2004.11.009
   Schotta G, 2004, GENE DEV, V18, P1251, DOI 10.1101/gad.300704
   Schotta G, 2008, GENE DEV, V22, P2048, DOI 10.1101/gad.476008
   Shi XB, 2007, MOL CELL, V27, P636, DOI 10.1016/j.molcel.2007.07.012
   Sorensen CS, 2012, NUCLEIC ACIDS RES, V40, P477, DOI 10.1093/nar/gkr697
   Takawa M, 2012, CANCER RES, V72, P3217, DOI 10.1158/0008-5472.CAN-11-3701
   Tardat M, 2007, J CELL BIOL, V179, P1413, DOI 10.1083/jcb.200706179
   Tardat M, 2010, NAT CELL BIOL, V12, P1086, DOI 10.1038/ncb2113
   Trojer P, 2007, CELL, V129, P915, DOI 10.1016/j.cell.2007.03.048
   Vermeulen M, 2010, CELL, V142, P967, DOI 10.1016/j.cell.2010.08.020
   Wang B, 2002, SCIENCE, V298, P1435, DOI 10.1126/science.1076182
   Ward IM, 2003, MOL CELL BIOL, V23, P2556, DOI 10.1128/MCB.23.7.2556-2563.2003
   Ward IM, 2003, J BIOL CHEM, V278, P19579, DOI 10.1074/jbc.C300117200
   West LE, 2010, J BIOL CHEM, V285, P37725, DOI 10.1074/jbc.M110.139527
   Wu SM, 2010, GENE DEV, V24, P2531, DOI 10.1101/gad.1984210
NR 56
TC 217
Z9 223
U1 1
U2 31
PU OXFORD UNIV PRESS
PI OXFORD
PA GREAT CLARENDON ST, OXFORD OX2 6DP, ENGLAND
SN 0305-1048
EI 1362-4962
J9 NUCLEIC ACIDS RES
JI Nucleic Acids Res.
PD MAR
PY 2013
VL 41
IS 5
BP 2797
EP 2806
DI 10.1093/nar/gkt012
PG 10
WC Biochemistry & Molecular Biology
WE Science Citation Index Expanded (SCI-EXPANDED)
SC Biochemistry & Molecular Biology
GA 132JB
UT WOS:000318062600009
PM 23345616
OA Green Published, gold, Green Submitted
DA 2022-04-10
ER

PT J
AU De Zio, D
   Cianfanelli, V
   Cecconi, F
AF De Zio, Daniela
   Cianfanelli, Valentina
   Cecconi, Francesco
TI New Insights into the Link Between DNA Damage and Apoptosis
SO ANTIOXIDANTS & REDOX SIGNALING
LA English
DT Review
ID NUCLEOTIDE EXCISION-REPAIR; DOUBLE-STRAND BREAKS; TUMOR-SUPPRESSOR;
   CELL-DEATH; HOMOLOGOUS RECOMBINATION; P53 PULSES; DYNAMICS; BINDING;
   KINASE; KU70
AB Significance: When lesions are unrepaired or there are defects in the DNA repair system, DNA damage is often correlated to apoptosis. However, different kinds of lesions and different degrees of lesion severity can trigger numerous signaling responses. Recent Advances: DNA repair proteins involved in specific DNA repair pathway can modulate the function or activity of some apoptotic factors, further emphasizing the crosstalk between DNA damage and cell death. Critical Issues: Here, we discuss the signaling networks that link DNA damage to apoptosis, and we focus on post-translational modification, leading to crucial changes in protein behavior, following various kinds of DNA damage. Moreover, we analyze the existence of apoptosis-related functions of typical repair proteins, leading to diverse, often-overlapping, DNA damage responses. Future Directions: The better understanding of the regulation and the functionality of key DNA repair proteins, also involved in apoptosis regulation, has the potential of modulating the cell outcomes on DNA damage, particularly in the context of cancer treatment.
C1 [De Zio, Daniela; Cianfanelli, Valentina; Cecconi, Francesco] Univ Roma Tor Vergata, Dulbecco Telethon Inst, Dept Biol, I-00133 Rome, Italy.
   [Cecconi, Francesco] IRCCS Fdn Santa Lucia, Lab Mol Neuroembryol, Rome, Italy.
RP Cecconi, F (corresponding author), Univ Roma Tor Vergata, Dulbecco Telethon Inst, Dept Biol, Via Ric Sci, I-00133 Rome, Italy.
EM daniela.de.zio@uniroma2.it; francesco.cecconi@uniroma2.it
RI Cianfanelli, Valentina/AAA-2682-2020; Cecconi, Francesco/K-3969-2016
OI Cianfanelli, Valentina/0000-0002-3857-9463; Cecconi,
   Francesco/0000-0002-5614-4359; De Zio, Daniela/0000-0002-9454-402X
FU Telethon FoundationFondazione Telethon [S99038TELU/TELC]; AIRCFondazione
   AIRC per la ricerca sul cancro; FISMFondazione Italiana Sclerosi
   Multipla (FISM); Italian Ministry of University and Research
   (PRIN)Ministry of Education, Universities and Research (MIUR)Research
   Projects of National Relevance (PRIN); Italian Ministry of University
   and Research (FIRB)Ministry of Education, Universities and Research
   (MIUR)Fund for Investment in Basic Research (FIRB); Italian Ministry of
   Health (Ricerca Finalizzata e Ricerca Corrente)
FX The authors are grateful to Dr. G. Filomeni for scientific discussion
   and suggestions. F. Cecconi is supported by Grants from the Telethon
   Foundation (S99038TELU/TELC), AIRC (2011), FISM (2009), the Italian
   Ministry of University and Research (PRIN 2009 and FIRB 2011 funding
   programs), and the Italian Ministry of Health (Ricerca Finalizzata e
   Ricerca Corrente).
CR AMES BN, 1989, FREE RADICAL RES COM, V7, P121, DOI 10.3109/10715768909087933
   Amsel AD, 2008, P NATL ACAD SCI USA, V105, P5117, DOI 10.1073/pnas.0706700105
   Andrews BJ, 2006, J BIOL CHEM, V281, P13596, DOI 10.1074/jbc.M512787200
   Batchelor E, 2008, MOL CELL, V30, P277, DOI 10.1016/j.molcel.2008.03.016
   Batchelor E, 2011, MOL SYST BIOL, V7, DOI 10.1038/msb.2011.20
   Batchelor E, 2009, NAT REV CANCER, V9, P371, DOI 10.1038/nrc2604
   Behrends C, 2010, NATURE, V466, P68, DOI 10.1038/nature09204
   Bennett SM, 2009, BMC MOL BIOL, V10, DOI 10.1186/1471-2199-10-86
   Bohgaki Toshiyuki, 2010, Genome Integr, V1, P15, DOI 10.1186/2041-9414-1-15
   Branzei D, 2008, NAT REV MOL CELL BIO, V9, P297, DOI 10.1038/nrm2351
   Budanov AV, 2008, CELL, V134, P451, DOI 10.1016/j.cell.2008.06.028
   Burma S, 2001, J BIOL CHEM, V276, P42462, DOI 10.1074/jbc.C100466200
   Cadet J, 1999, MUTAT RES-FUND MOL M, V424, P9, DOI 10.1016/S0027-5107(99)00004-4
   Caldecott KW, 2003, DNA REPAIR, V2, P955, DOI 10.1016/S1568-7864(03)00118-6
   Canman CE, 1998, SCIENCE, V281, P1677, DOI 10.1126/science.281.5383.1677
   Cardaci S, 2012, J CELL SCI, V125, P2115, DOI 10.1242/jcs.095216
   Carney JP, 1998, CELL, V93, P477, DOI 10.1016/S0092-8674(00)81175-7
   CERUTTI PA, 1994, LANCET, V344, P862, DOI 10.1016/S0140-6736(94)92832-0
   Chehab NH, 2000, GENE DEV, V14, P278
   Chen CS, 2007, CANCER RES, V67, P5318, DOI 10.1158/0008-5472.CAN-06-3996
   Ciccia A, 2010, MOL CELL, V40, P179, DOI 10.1016/j.molcel.2010.09.019
   Cohen HY, 2004, MOL CELL, V13, P627, DOI 10.1016/S1097-2765(04)00094-2
   Crighton D, 2006, CELL, V126, P121, DOI 10.1016/j.cell.2006.05.034
   Dai Y, 2010, CLIN CANCER RES, V16, P376, DOI 10.1158/1078-0432.CCR-09-1029
   De Zio D, 2011, CELL DEATH DIFFER, V18, P516, DOI 10.1038/cdd.2010.125
   De Zio Daniela, 2012, Int J Cell Biol, V2012, P752420, DOI 10.1155/2012/752420
   Di Giacomo Giuseppina, 2012, Int J Cell Biol, V2012, P361872, DOI 10.1155/2012/361872
   Fell VL, 2012, MOL CELL BIOL, V32, P76, DOI 10.1128/MCB.05661-11
   Feng ZH, 2007, CANCER RES, V67, P3043, DOI 10.1158/0008-5472.CAN-06-4149
   Fousteri M, 2008, CELL RES, V18, P73, DOI 10.1038/cr.2008.6
   Gao W, 2011, CELL DEATH DIFFER, V18, P1598, DOI 10.1038/cdd.2011.33
   Green DR, 2009, NATURE, V458, P1127, DOI 10.1038/nature07986
   Hamstra DA, 2006, CANCER RES, V66, P7482, DOI 10.1158/0008-5472.CAN-06-1405
   Heyer WD, 2010, ANNU REV GENET, V44, P113, DOI 10.1146/annurev-genet-051710-150955
   Hurley PJ, 2007, CELL CYCLE, V6, P414, DOI 10.4161/cc.6.4.3886
   Iijima K, 2008, DNA REPAIR, V7, P1705, DOI 10.1016/j.dnarep.2008.06.013
   Iwakuma T, 1997, CARCINOGENESIS, V18, P1631, DOI 10.1093/carcin/18.8.1631
   Jiricny J, 2006, NAT REV MOL CELL BIO, V7, P335, DOI 10.1038/nrm1907
   Kaina B, 2007, DNA REPAIR, V6, P1079, DOI 10.1016/j.dnarep.2007.03.008
   Kamer I, 2005, CELL, V122, P593, DOI 10.1016/j.cell.2005.06.014
   Kerr E, 2012, CELL DEATH DIFFER, V19, P1317, DOI 10.1038/cdd.2012.8
   Kinner A, 2008, NUCLEIC ACIDS RES, V36, P5678, DOI 10.1093/nar/gkn550
   Lahav G, 2004, NAT GENET, V36, P147, DOI 10.1038/ng1293
   Lieber MR, 2010, ANNU REV BIOCHEM, V79, P181, DOI 10.1146/annurev.biochem.052308.093131
   Lim TH, 2012, DNA REPAIR, V11, P259, DOI 10.1016/j.dnarep.2011.11.006
   Liu J, 2009, BRAIN RES, V1296, P164, DOI 10.1016/j.brainres.2009.07.101
   Liu YY, 2010, J BIOL CHEM, V285, P5974, DOI 10.1074/jbc.M109.076109
   Ljungman M, 1996, ONCOGENE, V13, P823
   Loewer A, 2010, CELL, V142, P89, DOI 10.1016/j.cell.2010.05.031
   Maiuri MC, 2010, CURR OPIN CELL BIOL, V22, P181, DOI 10.1016/j.ceb.2009.12.001
   Mao ZY, 2008, CELL CYCLE, V7, P2902, DOI 10.4161/cc.7.18.6679
   Marinovic-Terzic I, 2008, P NATL ACAD SCI USA, V105, P13993, DOI 10.1073/pnas.0806435105
   Myers K, 2009, PLOS GENET, V5, DOI 10.1371/journal.pgen.1000324
   Nam EA, 2011, BIOCHEM J, V436, P527, DOI 10.1042/BJ20102162
   Nouspikel T, 2008, DNA REPAIR, V7, P1155, DOI 10.1016/j.dnarep.2008.03.015
   Ozaki T, 2005, CANCER SCI, V96, P729, DOI 10.1111/j.1349-7006.2005.00116.x
   Purvis JE, 2012, SCIENCE, V336, P1440, DOI 10.1126/science.1218351
   Quiros S, 2010, CELL CYCLE, V9, P168, DOI 10.4161/cc.9.1.10363
   Reinhardt HC, 2012, TRENDS GENET, V28, P128, DOI 10.1016/j.tig.2011.12.002
   Roos WP, 2012, CANC LETT, DOI [10.1016/j.canlet.2012.01.007, DOI 10.1016/J.CANLET.2012.01.007]
   Scotcher J, 2011, J AM SOC MASS SPECTR, V22, P888, DOI 10.1007/s13361-011-0088-x
   Shieh SY, 2000, GENE DEV, V14, P289
   Shimodaira H, 2003, P NATL ACAD SCI USA, V100, P2420, DOI 10.1073/pnas.0438031100
   Sidi S, 2008, CELL, V133, P864, DOI 10.1016/j.cell.2008.03.037
   Stiff T, 2004, CANCER RES, V64, P2390, DOI 10.1158/0008-5472.CAN-03-3207
   Stoyanova T, 2009, CELL CYCLE, V8, P4067, DOI 10.4161/cc.8.24.10109
   Stoyanova T, 2009, P NATL ACAD SCI USA, V106, P10690, DOI 10.1073/pnas.0812254106
   Stracker TH, 2007, NATURE, V447, P218, DOI 10.1038/nature05740
   Subramanian C, 2005, P NATL ACAD SCI USA, V102, P4842, DOI 10.1073/pnas.0408351102
   Sun XZ, 2003, ANTIOXID REDOX SIGN, V5, P655, DOI 10.1089/152308603770310338
   Symington LS, 2011, ANNU REV GENET, V45, P247, DOI 10.1146/annurev-genet-110410-132435
   Velu CS, 2007, BIOCHEMISTRY-US, V46, P7765, DOI 10.1021/bi700425y
   Wang JYJ, 2006, CANCER CELL, V9, P417, DOI 10.1016/j.ccr.2006.05.013
   Wei CL, 2006, CELL, V124, P207, DOI 10.1016/j.cell.2005.10.043
   Wei W, 2011, CARCINOGENESIS, V32, P973, DOI 10.1093/carcin/bgr041
   Wei W, 2010, SCI TRANSL MED, V2, DOI 10.1126/scitranslmed.3000328
   Wilson DM, 2007, DNA REPAIR, V6, P544, DOI 10.1016/j.dnarep.2006.10.017
   Wiseman H, 1996, BIOCHEM J, V313, P17, DOI 10.1042/bj3130017
   Wyman C, 2006, ANNU REV GENET, V40, P363, DOI 10.1146/annurev.genet.40.110405.090451
   Yoshida K, 2010, CANCER SCI, V101, P831, DOI 10.1111/j.1349-7006.2010.01488.x
   Yoshioka K, 2006, MOL CELL, V22, P501, DOI 10.1016/j.molcel.2006.04.023
   Yusuf MA, 2010, FREE RADICAL BIO MED, V49, P908, DOI 10.1016/j.freeradbiomed.2010.06.020
   Zhang TL, 2007, CELL CYCLE, V6, P85, DOI 10.4161/cc.6.1.3705
NR 83
TC 60
Z9 61
U1 0
U2 30
PU MARY ANN LIEBERT, INC
PI NEW ROCHELLE
PA 140 HUGUENOT STREET, 3RD FL, NEW ROCHELLE, NY 10801 USA
SN 1523-0864
EI 1557-7716
J9 ANTIOXID REDOX SIGN
JI Antioxid. Redox Signal.
PD AUG
PY 2013
VL 19
IS 6
BP 559
EP 571
DI 10.1089/ars.2012.4938
PG 13
WC Biochemistry & Molecular Biology; Endocrinology & Metabolism
WE Science Citation Index Expanded (SCI-EXPANDED)
SC Biochemistry & Molecular Biology; Endocrinology & Metabolism
GA 185WR
UT WOS:000322001600004
PM 23025416
OA Green Published
DA 2022-04-10
ER

PT J
AU Tosetti, F
   Alessio, M
   Poggi, A
   Zocchi, MR
AF Tosetti, Francesca
   Alessio, Massimo
   Poggi, Alessandro
   Zocchi, Maria Raffaella
TI ADAM10 Site-Dependent Biology: Keeping Control of a Pervasive Protease
SO INTERNATIONAL JOURNAL OF MOLECULAR SCIENCES
LA English
DT Review
DE ADAM; metalloproteinases; subcellular trafficking; vesicles; exosomes;
   signaling; cancer; ADC; immunomodulation
ID METALLOPROTEASE 10 ADAM10; CELL-CELL; TSPANC8 TETRASPANINS;
   MEMBRANE-PROTEINS; NOTCH ACTIVATION; ECTODOMAIN CLEAVAGE; CYTOPLASMIC
   DOMAIN; EGF RECEPTOR; DISINTEGRIN; ALPHA
AB Enzymes, once considered static molecular machines acting in defined spatial patterns and sites of action, move to different intra- and extracellular locations, changing their function. This topological regulation revealed a close cross-talk between proteases and signaling events involving post-translational modification, membrane tyrosine kinase receptors and G-protein coupled receptors, motor proteins shuttling cargos in intracellular vesicles, and small-molecule messengers. Here, we highlight recent advances in our knowledge of regulation and function of A Disintegrin And Metalloproteinase (ADAM) endopeptidases at specific subcellular sites, or in multimolecular complexes, with a special focus on ADAM10, and tumor necrosis factor-alpha convertase (TACE/ADAM17), since these two enzymes belong to the same family, share selected substrates and bioactivity. We will discuss some examples of ADAM10 activity modulated by changing partners and subcellular compartmentalization, with the underlying hypothesis that restraining protease activity by spatial segregation is a complex and powerful regulatory tool.
C1 [Tosetti, Francesca; Poggi, Alessandro] IRCCS Osped Policlin S Martino, Mol Oncol & Angiogenesis Unit, Largo R Benzi 10, I-16132 Genoa, Italy.
   [Alessio, Massimo] IRCCS San Raffaele Sci Inst, Proteome Biochem, I-20132 Milan, Italy.
   [Zocchi, Maria Raffaella] IRCCS San Raffaele Sci Inst, Div Immunol Transplants & Infect Dis, I-20132 Milan, Italy.
RP Tosetti, F (corresponding author), IRCCS Osped Policlin S Martino, Mol Oncol & Angiogenesis Unit, Largo R Benzi 10, I-16132 Genoa, Italy.
EM francesca.tosetti@hsanmartino.it; alessio.massimo@hsr.it;
   alessandro.poggi@hsanmartino.it; zocchi.maria@hsr.it
RI ; Poggi, Alessandro/K-6664-2016
OI Tosetti, Francesca/0000-0001-8772-4834; Poggi,
   Alessandro/0000-0002-1860-430X
FU 5x1000 2015 from the Italian Ministry of Health; 5x1000 2016 from the
   Italian Ministry of Health; AIRC (Associazione Italiana per la Ricerca
   sul Cancro)Fondazione AIRC per la ricerca sul cancro [IG-21648
   28/11/2018]
FX This research was funded by the 5x1000 2015 and 5x1000 2016 from the
   Italian Ministry of Health to AP and the AIRC (Associazione Italiana per
   la Ricerca sul Cancro) IG-21648 28/11/2018.
CR Adrain C, 2011, EMBO REP, V12, P421, DOI 10.1038/embor.2011.50
   Aljohmani A, 2020, FRONT CARDIOVASC MED, V7, DOI 10.3389/fcvm.2020.608281
   Alvarez-Fernandez SM, 2016, ONCOTARGET, V7, P80059, DOI 10.18632/oncotarget.11181
   Andrzejewski MG, 2010, BIOCHEM BIOPH RES CO, V395, P178, DOI 10.1016/j.bbrc.2010.03.139
   Arduise C, 2008, J IMMUNOL, V181, P7002, DOI 10.4049/jimmunol.181.10.7002
   Ashiru O, 2010, CANCER RES, V70, P481, DOI 10.1158/0008-5472.CAN-09-1688
   Austin CD, 1996, J CELL BIOL, V135, P1471, DOI 10.1083/jcb.135.6.1471
   Barbieri E, 2016, CURR OPIN CELL BIOL, V39, P21, DOI 10.1016/j.ceb.2016.01.012
   Bleibaum F, 2019, J MOL CELL BIOL, V11, P979, DOI 10.1093/jmcb/mjz008
   Britton GJ, 2017, ELIFE, V6, DOI 10.7554/eLife.20003
   Burton JC, 2019, FRONT CELL DEV BIOL, V7, DOI 10.3389/fcell.2019.00043
   Caescu CI, 2009, BIOCHEM J, V424, P79, DOI 10.1042/BJ20090549
   Chastagner P, 2017, SCI SIGNAL, V10, DOI 10.1126/scisignal.aag2989
   Cochet M, 2013, ACS CHEM NEUROSCI, V4, P130, DOI 10.1021/cn300095t
   Cormier Kevin W, 2017, F1000Res, V6, DOI 10.12688/f1000research.10557.1
   Couchie D, 2017, CIRCULATION, V136, P464, DOI 10.1161/CIRCULATIONAHA.117.027612
   Cvjetkovic A, 2016, SCI REP-UK, V6, DOI 10.1038/srep36338
   De Robertis EM, 2015, DEV CELL, V35, P401, DOI 10.1016/j.devcel.2015.11.009
   Defourny J, 2019, ISCIENCE, V11, P246, DOI 10.1016/j.isci.2018.12.017
   Deng W, 2015, BIOPOLYMERS, V104, P317, DOI 10.1002/bip.22651
   Deng W, 2014, P NATL ACAD SCI USA, V111, P15987, DOI 10.1073/pnas.1409354111
   Dornier E, 2012, J CELL BIOL, V199, P481, DOI 10.1083/jcb.201201133
   Duffy MJ, 2009, CLIN CANCER RES, V15, P1140, DOI 10.1158/1078-0432.CCR-08-1585
   Dyson HJ, 2005, NAT REV MOL CELL BIO, V6, P197, DOI 10.1038/nrm1589
   Ebsen H, 2015, MOL IMMUNOL, V65, P416, DOI 10.1016/j.molimm.2015.02.008
   Ebsen H, 2014, PLOS ONE, V9, DOI 10.1371/journal.pone.0102899
   Edwards DR, 2008, MOL ASPECTS MED, V29, P258, DOI 10.1016/j.mam.2008.08.001
   Escalona RM, 2018, INT J MOL SCI, V19, DOI 10.3390/ijms19020450
   Evans SF, 2011, J BIOL CHEM, V286, P29556, DOI 10.1074/jbc.M111.219675
   Forneris F, 2008, SCIENCE, V321, P213, DOI 10.1126/science.1151118
   Freeman M, 2016, BIOCHEM SOC T, V44, P945, DOI 10.1042/BST20160035
   Ghadially H, 2017, BRIT J CANCER, V116, P1208, DOI 10.1038/bjc.2017.79
   Gibb DR, 2011, MOL IMMUNOL, V48, P1319, DOI 10.1016/j.molimm.2010.12.005
   Greene AC, 2014, BIOPHYS J, V106, P2196, DOI 10.1016/j.bpj.2014.03.043
   Grotzinger J, 2017, BBA-MOL CELL RES, V1864, P2088, DOI 10.1016/j.bbamcr.2017.05.024
   Groth E, 2016, BBA-MOL CELL RES, V1863, P2795, DOI 10.1016/j.bbamcr.2016.09.002
   Gutwein P, 2002, FASEB J, V16, P292, DOI 10.1096/fj.02-0430fje
   Haining EJ, 2012, J BIOL CHEM, V287, DOI 10.1074/jbc.M112.416503
   Hansen HP, 2016, ONCOTARGET, V7, P30523, DOI 10.18632/oncotarget.8864
   Hansen HP, 2014, J PATHOL, V232, P405, DOI 10.1002/path.4306
   Hartmann D, 2002, HUM MOL GENET, V11, P2615, DOI 10.1093/hmg/11.21.2615
   Hartmann M, 2015, J BIOL CHEM, V290, P17041, DOI 10.1074/jbc.M114.610204
   Hauser AS, 2017, NAT REV DRUG DISCOV, V16, P829, DOI 10.1038/nrd.2017.178
   Horion J, 2007, J BIOL CHEM, V282, P15383, DOI 10.1074/jbc.M609166200
   Horvath GL, 2011, IMMUNOL REV, V243, P119, DOI 10.1111/j.1600-065X.2011.01050.x
   Hundhausen C, 2003, BLOOD, V102, P1186, DOI 10.1182/blood-2002-12-3775
   Hundhausen C, 2007, J IMMUNOL, V178, P8064, DOI 10.4049/jimmunol.178.12.8064
   Irannejad R, 2017, NAT CHEM BIOL, V13, P799, DOI 10.1038/nchembio.2389
   Janes PW, 2005, CELL, V123, P291, DOI 10.1016/j.cell.2005.08.014
   Ji YJ, 2014, NAT COMMUN, V5, DOI 10.1038/ncomms4516
   Jia HP, 2009, AM J PHYSIOL-LUNG C, V297, pL84, DOI 10.1152/ajplung.00071.2009
   Jouannet S, 2016, CELL MOL LIFE SCI, V73, P1895, DOI 10.1007/s00018-015-2111-z
   Kalra H, 2016, INT J MOL SCI, V17, DOI 10.3390/ijms17020170
   Kedersha N, 2013, TRENDS BIOCHEM SCI, V38, P494, DOI 10.1016/j.tibs.2013.07.004
   Kleino I, 2015, PLOS ONE, V10, DOI 10.1371/journal.pone.0121301
   Kowal J, 2016, P NATL ACAD SCI USA, V113, pE968, DOI 10.1073/pnas.1521230113
   Lambrecht BN, 2018, NAT REV IMMUNOL, V18, P745, DOI 10.1038/s41577-018-0068-5
   Langemeyer L, 2018, TRENDS CELL BIOL, V28, P957, DOI 10.1016/j.tcb.2018.06.007
   Le Gall SM, 2010, J CELL SCI, V123, P3913, DOI 10.1242/jcs.069997
   Le Gall SM, 2009, MOL BIOL CELL, V20, P1785, DOI 10.1091/mbc.E08-11-1135
   Lee J, 2018, IMMUN INFLAMM DIS, V6, P312, DOI 10.1002/iid3.219
   Li NY, 2007, EMBO J, V26, P494, DOI 10.1038/sj.emboj.7601520
   Li X, 2015, P NATL ACAD SCI USA, V112, P6080, DOI 10.1073/pnas.1505649112
   Lichtenthaler SF, 2018, EMBO J, V37, DOI 10.15252/embj.201899456
   Linford A, 2012, DEV CELL, V22, P952, DOI 10.1016/j.devcel.2012.04.010
   Marcello E, 2007, J NEUROSCI, V27, P1682, DOI 10.1523/JNEUROSCI.3439-06.2007
   Marcello E, 2010, J BIOL CHEM, V285, P10376, DOI 10.1074/jbc.M109.055947
   Maretzky T, 2015, J BIOL CHEM, V290, P7416, DOI 10.1074/jbc.M114.603753
   Maretzky T, 2013, P NATL ACAD SCI USA, V110, P11433, DOI 10.1073/pnas.1302553110
   Mathews JA, 2010, J BIOL CHEM, V285, P37531, DOI 10.1074/jbc.M110.141556
   Matthews AL, 2017, BIOCHEM SOC T, V45, P719, DOI 10.1042/BST20160290
   Matthews AL, 2017, PLATELETS, V28, P333, DOI 10.1080/09537104.2016.1184751
   McCarthy AJ, 2017, BIOCHEM SOC T, V45, P1185, DOI 10.1042/BST20170002
   Merilahti JAM, 2019, ONCOGENE, V38, P151, DOI 10.1038/s41388-018-0465-z
   Merilahti JAM, 2017, MOL BIOL CELL, V28, P3123, DOI 10.1091/mbc.E17-04-0261
   Millichip MI, 1998, BIOCHEM BIOPH RES CO, V245, P594, DOI 10.1006/bbrc.1998.8485
   Murphy G, 2008, NAT REV CANCER, V8, P929, DOI 10.1038/nrc2459
   Noy PJ, 2016, J BIOL CHEM, V291, P3145, DOI 10.1074/jbc.M115.703058
   Nussinov R, 2013, ANNU REV BIOPHYS, V42, P169, DOI 10.1146/annurev-biophys-083012-130257
   Perez-Hernandez D, 2013, J BIOL CHEM, V288, P11649, DOI 10.1074/jbc.M112.445304
   Piffoux M, 2019, ADV DRUG DELIVER REV, V138, P247, DOI 10.1016/j.addr.2018.12.009
   Postina R, 2012, J NEUROCHEM, V120, P46, DOI 10.1111/j.1471-4159.2011.07459.x
   Prox J, 2012, CELL MOL LIFE SCI, V69, P2919, DOI 10.1007/s00018-012-0960-2
   Qiu H, 2015, MOL CELL BIOL, V35, P3622, DOI 10.1128/MCB.00116-15
   Saha N, 2019, CANCER LETT, V467, P50, DOI 10.1016/j.canlet.2019.10.003
   Saint-Pol J, 2017, BIOCHEM SOC T, V45, P937, DOI 10.1042/BST20160296
   Salminen A, 2013, PROG NEUROBIOL, V106, P33, DOI 10.1016/j.pneurobio.2013.06.002
   Salminen A, 2012, AGING-US, V4, P166, DOI 10.18632/aging.100444
   Saraceno C, 2014, CELL DEATH DIS, V5, DOI 10.1038/cddis.2014.492
   Scilabra SD, 2018, SCI REP-UK, V8, DOI 10.1038/s41598-018-32910-4
   Seegar TCM, 2019, EXP BIOL MED, V244, P1510, DOI 10.1177/1535370219865901
   Seegar TCM, 2017, CELL, V171, P1638, DOI 10.1016/j.cell.2017.11.014
   Seipold L, 2018, CELL MOL LIFE SCI, V75, P3251, DOI 10.1007/s00018-018-2791-2
   Shah J, 2018, CELL REP, V25, P2132, DOI 10.1016/j.celrep.2018.10.088
   Shimoda M, 2017, BBA-MOL CELL RES, V1864, P1989, DOI 10.1016/j.bbamcr.2017.05.027
   Shiuan E, 2016, CANCER RES, V76, P6452, DOI 10.1158/0008-5472.CAN-16-1521
   Singh B, 2017, SEMIN CANCER BIOL, V47, P1, DOI 10.1016/j.semcancer.2017.05.004
   Solanas G, 2011, NAT CELL BIOL, V13, P1100, DOI 10.1038/ncb2298
   Steinbuck MP, 2018, J IMMUNOL, V200, P997, DOI 10.4049/jimmunol.1700070
   Stoeck A, 2006, BIOCHEM J, V393, P609, DOI 10.1042/BJ20051013
   Stoica R, 2014, NAT COMMUN, V5, DOI 10.1038/ncomms4996
   Sun LF, 2016, CURR OPIN STRUC BIOL, V37, P97, DOI 10.1016/j.sbi.2015.12.008
   Tang BY, 2020, FASEB J, V34, P4956, DOI 10.1096/fj.201902649R
   Tosetti F, 2018, ONCOIMMUNOLOGY, V7, DOI 10.1080/2162402X.2017.1421889
   Tousseyn T, 2009, J BIOL CHEM, V284, P11738, DOI 10.1074/jbc.M805894200
   Uche UU, 2018, J EXP MED, V215, P3165, DOI 10.1084/jem.20172018
   Urban S, 2016, SEMIN CELL DEV BIOL, V60, P1, DOI 10.1016/j.semcdb.2016.10.002
   Uversky VN, 2013, CURR PHARM DESIGN, V19, P4191, DOI 10.2174/1381612811319230005
   van Deventer SJ, 2017, BIOCHEM SOC T, V45, P741, DOI 10.1042/BST20160284
   Vilardaga JP, 2014, NAT CHEM BIOL, V10, P700, DOI [10.1038/NCHEMBIO.1611, 10.1038/nchembio.1611]
   WOLFSBERG TG, 1995, J CELL BIOL, V131, P275, DOI 10.1083/jcb.131.2.275
   WOLFSBERG TG, 1995, DEV BIOL, V169, P378, DOI 10.1006/dbio.1995.1152
   Wong ET, 2015, J BIOL CHEM, V290, P12135, DOI 10.1074/jbc.M114.624072
   Wunderle L, 2016, SCI REP-UK, V6, DOI 10.1038/srep27342
   Xu JX, 2017, CIRC RES, V121, P43, DOI 10.1161/CIRCRESAHA.116.310509
   Xu PL, 2012, SCI SIGNAL, V5, DOI 10.1126/scisignal.2002689
   Yan YB, 2002, J CELL BIOL, V158, P221, DOI 10.1083/jcb.200112026
   Zhao Z, 2019, TRAFFIC, V20, P202, DOI 10.1111/tra.12630
   Zimmerman B, 2016, CELL, V167, P1041, DOI 10.1016/j.cell.2016.09.056
   Zocchi MR, 2012, BLOOD, V119, P1479, DOI 10.1182/blood-2011-07-370841
NR 120
TC 2
Z9 2
U1 1
U2 3
PU MDPI
PI BASEL
PA ST ALBAN-ANLAGE 66, CH-4052 BASEL, SWITZERLAND
EI 1422-0067
J9 INT J MOL SCI
JI Int. J. Mol. Sci.
PD MAY
PY 2021
VL 22
IS 9
AR 4969
DI 10.3390/ijms22094969
PG 19
WC Biochemistry & Molecular Biology; Chemistry, Multidisciplinary
WE Science Citation Index Expanded (SCI-EXPANDED)
SC Biochemistry & Molecular Biology; Chemistry
GA SC0VS
UT WOS:000650401000001
PM 34067041
OA Green Published, gold
DA 2022-04-10
ER

PT J
AU Henneberg, LT
   Schulman, BA
AF Henneberg, Lukas T.
   Schulman, Brenda A.
TI Decoding the messaging of the ubiquitinationsystem using chemical and
   protein probes
SO CELL CHEMICAL BIOLOGY
LA English
DT Review
ID E3 LIGASE; ACTIVATING ENZYME; COMPLEX REVEALS; SELECTIVE DEGRADATION;
   ALLOSTERIC INHIBITOR; MECHANISM; E1; DISCOVERY; SUBSTRATE; CANCER
AB Post-translational modification of proteins by ubiquitinationis required for nearly all aspects of eukaryotic cell function. The numerous target of ubiquitination, and variety of ubiquitinationmodifications, are often likened to a code, where the ultimate messages are diverse responses to target ubiquitination. E1, E2, and E3 multi-protein enzymatic assemblies modify specific target and thus function as messengers. Recent advances in chemical and protein tools have revolutionized our ability to explore the ubiquitinationsystem, through enabling new high-throughput screening methods, matching ubiquitination enzymes with their cellular target, revealing intricate allosteric mechanism regulating ubiquitylating enzymes, facilitating structural revelation of transient assemblies determined by multivalent interactions, and providing new paradigms for inhibiting and redirecting ubiquitination in vivo as new therapeutics. Here we discuss the development of methods that control, disrupt, and extract the flow of information across the ubiquitinationsystem and have enabled elucidation of the underlying molecular and cellular biology.
C1 [Henneberg, Lukas T.; Schulman, Brenda A.] Max Planck Inst Biochem, Dept Mol Machines & Signaling, Martinsried, Germany.
RP Schulman, BA (corresponding author), Max Planck Inst Biochem, Dept Mol Machines & Signaling, Martinsried, Germany.
EM schulman@biochem.mpg.de
OI Schulman, Brenda/0000-0002-3083-1126; Henneberg,
   Lukas/0000-0003-3477-4541
FU Max Planck GesellschaftMax Planck Society; ERCEuropean Research Council
   (ERC)European Commission [H2020 789016-NEDD8Activate]; DFGGerman
   Research Foundation (DFG)European Commission [SCHU 3196/1-1]
FX The Schulman department is supported by the Max Planck Gesellschaft, the
   ERC (H2020 789016-NEDD8Activate), and Leibniz Prize from the DFG (SCHU
   3196/1-1).
CR An H, 2016, CHEM COMMUN, V52, P2477, DOI 10.1039/c5cc08592f
   Ashida H, 2014, NAT REV MICROBIOL, V12, P399, DOI 10.1038/nrmicro3259
   Backus KM, 2016, NATURE, V534, P570, DOI 10.1038/nature18002
   Baek K, 2020, NATURE, V578, P461, DOI 10.1038/s41586-020-2000-y
   Bakos G, 2018, NAT COMMUN, V9, DOI 10.1038/s41467-018-07251-5
   Banik SM, 2020, NATURE, V584, P291, DOI 10.1038/s41586-020-2545-9
   Brown NG, 2016, CELL, V165, P1440, DOI 10.1016/j.cell.2016.05.037
   Brown NG, 2015, P NATL ACAD SCI USA, V112, P5272, DOI 10.1073/pnas.1504161112
   Brownell JE, 2010, MOL CELL, V37, P102, DOI 10.1016/j.molcel.2009.12.024
   Buckley DL, 2015, ACS CHEM BIOL, V10, P1831, DOI 10.1021/acschembio.5b00442
   Byrne R, 2017, CHEMBIOCHEM, V18, P1415, DOI 10.1002/cbic.201700006
   Cappadocia L, 2015, NAT STRUCT MOL BIOL, V22, P968, DOI 10.1038/nsmb.3116
   Ceccarelli DF, 2011, CELL, V145, P1075, DOI 10.1016/j.cell.2011.05.039
   Chaugule VK, 2011, EMBO J, V30, P2853, DOI 10.1038/emboj.2011.204
   Chen Z, 2017, MOL CELL, V66, P345, DOI 10.1016/j.molcel.2017.03.020
   Chojnacki M, 2017, CELL CHEM BIOL, V24, P443, DOI 10.1016/j.chembiol.2017.02.013
   Clague MJ, 2015, TRENDS CELL BIOL, V25, P417, DOI 10.1016/j.tcb.2015.03.002
   Clift D, 2018, NAT PROTOC, V13, P2149, DOI 10.1038/s41596-018-0028-3
   Conole D, 2019, FRONT CHEM, V7, DOI 10.3389/fchem.2019.00876
   Deshaies RJ, 2009, ANNU REV BIOCHEM, V78, P399, DOI 10.1146/annurev.biochem.78.101807.093809
   Ding K, 2005, J AM CHEM SOC, V127, P10130, DOI 10.1021/ja051147z
   Dokmanovic M, 2005, J CELL BIOCHEM, V96, P293, DOI 10.1002/jcb.20532
   Dou H, 2012, NAT STRUCT MOL BIOL, V19, P876, DOI 10.1038/nsmb.2379
   Dove KK, 2017, J MOL BIOL, V429, P3363, DOI 10.1016/j.jmb.2017.08.008
   Fan JB, 2015, SCI REP-UK, V5, DOI 10.1038/srep12704
   Gallagher E, 2006, P NATL ACAD SCI USA, V103, P1717, DOI 10.1073/pnas.0510664103
   Gollner A, 2016, J MED CHEM, V59, P10147, DOI 10.1021/acs.jmedchem.6b00900
   Gui WJ, 2018, J AM CHEM SOC, V140, P12424, DOI 10.1021/jacs.8b05147
   HAAS AL, 1982, J BIOL CHEM, V257, P2543
   HAAS AL, 1983, BIOCHEMISTRY-US, V22, P4388, DOI 10.1021/bi00288a007
   HAAS AL, 1982, J BIOL CHEM, V257, P329
   Han T, 2017, SCIENCE, V356, DOI 10.1126/science.aal3755
   Hann ZS, 2019, P NATL ACAD SCI USA, V116, P15475, DOI 10.1073/pnas.1905488116
   Hendriks IA, 2014, NAT STRUCT MOL BIOL, V21, P927, DOI 10.1038/nsmb.2890
   Hewings DS, 2017, FEBS J, V284, P1555, DOI 10.1111/febs.14039
   Holzer P, 2015, J MED CHEM, V58, P6348, DOI 10.1021/acs.jmedchem.5b00810
   Horn-Ghetko D, 2021, NATURE, V590, DOI 10.1038/s41586-021-03197-9
   Huang H, 2014, NAT CHEM BIOL, V10, P156, DOI [10.1038/NCHEMBIO.1412, 10.1038/nchembio.1412]
   Huang XD, 2016, CELL RES, V26, P484, DOI 10.1038/cr.2016.31
   Hyer ML, 2018, NAT MED, V24, P186, DOI 10.1038/nm.4474
   Ibrahim AFM, 2020, MOL CELL, V79, P155, DOI 10.1016/j.molcel.2020.04.032
   Imaide S., 2020, TRIVALENT PROTACS EN, DOI [10.26434/chemrxiv.13218695, DOI 10.26434/CHEMRXIV.13218695]
   Isaacson MK, 2009, CELL HOST MICROBE, V5, P559, DOI 10.1016/j.chom.2009.05.012
   Johansson H, 2019, J AM CHEM SOC, V141, P2703, DOI 10.1021/jacs.8b13193
   Kaiser SE, 2013, AUTOPHAGY, V9, P778, DOI 10.4161/auto.23644
   Kamadurai HB, 2013, ELIFE, V2, DOI 10.7554/eLife.00828
   Kamadurai HB, 2009, MOL CELL, V36, P1095, DOI 10.1016/j.molcel.2009.11.010
   Kathman SG, 2014, J MED CHEM, V57, P4969, DOI 10.1021/jm500345q
   Kelsall IR, 2013, EMBO J, V32, P2848, DOI 10.1038/emboj.2013.209
   Kim W, 2011, MOL CELL, V44, P325, DOI 10.1016/j.molcel.2011.08.025
   Knight ZA, 2010, NAT REV CANCER, V10, P130, DOI 10.1038/nrc2787
   Krist DT, 2016, CHEM SCI, V7, P5587, DOI 10.1039/c6sc01167e
   Krist DT, 2015, BIOCHEMISTRY-US, V54, P4411, DOI 10.1021/acs.biochem.5b00625
   Kronke J, 2014, SCIENCE, V343, P301, DOI 10.1126/science.1244851
   Kumar A, 2017, NAT STRUCT MOL BIOL, V24, P475, DOI 10.1038/nsmb.3400
   Lamoliatte F, 2013, MOL CELL PROTEOMICS, V12, P2536, DOI 10.1074/mcp.M112.025569
   Lechtenberg BC, 2016, NATURE, V529, P546, DOI 10.1038/nature16511
   Liu XP, 2017, NAT COMMUN, V8, DOI 10.1038/ncomms14286
   Lu G, 2014, SCIENCE, V343, P305, DOI 10.1126/science.1244917
   Lu XQ, 2010, J AM CHEM SOC, V132, P1748, DOI 10.1021/ja9088549
   Lv L, 2020, ELIFE, V9, DOI 10.7554/eLife.59994
   Lv ZY, 2017, MOL CELL, V65, P699, DOI 10.1016/j.molcel.2017.01.008
   Mabbitt PD, 2020, NAT CHEM BIOL, V16, P1227, DOI 10.1038/s41589-020-0598-6
   Maculins T, 2016, CELL RES, V26, P499, DOI 10.1038/cr.2016.30
   Maspero E, 2013, NAT STRUCT MOL BIOL, V20, P696, DOI 10.1038/nsmb.2566
   Mathur S, 2020, CELL CHEM BIOL, V27, P74, DOI 10.1016/j.chembiol.2019.11.013
   Mayor-Ruiz C, 2020, NAT CHEM BIOL, V16, P1199, DOI 10.1038/s41589-020-0594-x
   Merkley N, 2005, J BIOL CHEM, V280, P31732, DOI 10.1074/jbc.M505205200
   Mulder MPC, 2016, NAT CHEM BIOL, V12, P523, DOI 10.1038/nchembio.2084
   Nabet B, 2018, NAT CHEM BIOL, V14, P431, DOI 10.1038/s41589-018-0021-8
   Naito Mikihiko, 2019, Drug Discov Today Technol, V31, P35, DOI 10.1016/j.ddtec.2018.12.002
   Niphakis MJ, 2014, ANNU REV BIOCHEM, V83, P341, DOI 10.1146/annurev-biochem-060713-035708
   O'Connor HF, 2018, METHODS MOL BIOL, V1844, P85, DOI 10.1007/978-1-4939-8706-1_7
   O'Connor HF, 2015, EMBO REP, V16, P1699, DOI 10.15252/embr.201540620
   Olsen SK, 2013, MOL CELL, V49, P884, DOI 10.1016/j.molcel.2013.01.013
   Olsen SK, 2010, NATURE, V463, P906, DOI 10.1038/nature08765
   Orlicky S, 2010, NAT BIOTECHNOL, V28, P733, DOI 10.1038/nbt.1646
   Pao KC, 2018, NATURE, V556, P381, DOI 10.1038/s41586-018-0026-1
   Pao KC, 2016, NAT CHEM BIOL, V12, P324, DOI [10.1038/NCHEMBIO.2045, 10.1038/nchembio.2045]
   Park SJ, 2017, J BIOL CHEM, V292, P16539, DOI 10.1074/jbc.M116.773200
   Park S, 2015, CHEM SCI, V6, P1770, DOI [10.1039/c4sc02340d, 10.1039/C4SC02340D]
   Plechanovova A, 2012, NATURE, V489, P115, DOI 10.1038/nature11376
   Popovic D, 2014, NAT MED, V20, P1242, DOI 10.1038/nm.3739
   Pruneda JN, 2012, MOL CELL, V47, P933, DOI 10.1016/j.molcel.2012.07.001
   Qiu JZ, 2017, FRONT CELL INFECT MI, V7, DOI 10.3389/fcimb.2017.00487
   Randow F, 2009, NAT CELL BIOL, V11, P527, DOI 10.1038/ncb0509-527
   Rennie ML, 2020, CURR OPIN STRUC BIOL, V62, P189, DOI 10.1016/j.sbi.2020.02.003
   Reverter D, 2005, NATURE, V435, P687, DOI 10.1038/nature03588
   Rogers JM, 2021, RSC CHEM BIOL, V2, P944, DOI 10.1039/d1cb90015c
   Saghatelian A, 2004, P NATL ACAD SCI USA, V101, P10000, DOI 10.1073/pnas.0402784101
   Sakamoto KM, 2003, MOL CELL PROTEOMICS, V2, P1350, DOI 10.1074/mcp.T300009-MCP200
   Sakamoto KM, 2001, P NATL ACAD SCI USA, V98, P8554, DOI 10.1073/pnas.141230798
   Sauve V, 2018, NAT STRUCT MOL BIOL, V25, P623, DOI 10.1038/s41594-018-0088-7
   Schneekloth AR, 2008, BIOORG MED CHEM LETT, V18, P5904, DOI 10.1016/j.bmcl.2008.07.114
   Schneekloth JS, 2004, J AM CHEM SOC, V126, P3748, DOI 10.1021/ja039025z
   Schulman BA, 2009, NAT REV MOL CELL BIO, V10, P319, DOI 10.1038/nrm2673
   Scott DC, 2014, CELL, V157, P1671, DOI 10.1016/j.cell.2014.04.037
   Serniwka SA, 2009, BIOCHEMISTRY-US, V48, P12169, DOI 10.1021/bi901686j
   Slabicki M, 2020, NATURE, V585, P293, DOI 10.1038/s41586-020-2374-x
   Soucy TA, 2009, NATURE, V458, P732, DOI 10.1038/nature07884
   Stanley M, 2015, ACS CHEM BIOL, V10, P1542, DOI 10.1021/acschembio.5b00118
   Streich FC, 2016, NATURE, V536, P304, DOI 10.1038/nature19071
   Sui X, 2020, CHEM SCI, V11, P12633, DOI 10.1039/d0sc03295f
   Swatek KN, 2016, CELL RES, V26, P399, DOI 10.1038/cr.2016.39
   Tong S, 2017, SCI REP-UK, V7, DOI 10.1038/s41598-017-06098-y
   Uehara T, 2017, NAT CHEM BIOL, V13, P675, DOI 10.1038/nchembio.2363
   Wagner SA, 2011, MOL CELL PROTEOMICS, V10, DOI 10.1074/mcp.M111.013284
   Wang YY, 2017, NAT COMMUN, V8, DOI 10.1038/s41467-017-01974-7
   Wang Z, 2019, NAT COMMUN, V10, DOI 10.1038/s41467-019-11224-7
   Wauer T, 2015, NATURE, V524, P370, DOI 10.1038/nature14879
   Wauer T, 2013, EMBO J, V32, P2099, DOI 10.1038/emboj.2013.125
   Wertz IE, 2019, CELL CHEM BIOL, V26, P156, DOI 10.1016/j.chembiol.2018.10.022
   Williams KM, 2019, NAT COMMUN, V10, DOI 10.1038/s41467-019-11061-8
   Xu L, 2019, CHEM COMMUN, V55, P7109, DOI 10.1039/c9cc03739j
   Yamaguchi M, 2016, MOL CELL, V63, P593, DOI 10.1016/j.molcel.2016.07.003
   Zhang JM, 2009, NAT REV CANCER, V9, P28, DOI 10.1038/nrc2559
   Zhang YF, 2019, J AM CHEM SOC, V141, P14742, DOI 10.1021/jacs.9b06820
   Zhao B, 2012, CHEM BIOL, V19, P1265, DOI 10.1016/j.chembiol.2012.07.023
   Zhu K, 2017, EMBO REP, V18, P1618, DOI 10.15252/embr.201744454
   Zhuang M, 2013, MOL CELL, V49, P273, DOI 10.1016/j.molcel.2012.10.022
NR 120
TC 3
Z9 4
U1 3
U2 5
PU CELL PRESS
PI CAMBRIDGE
PA 50 HAMPSHIRE ST, FLOOR 5, CAMBRIDGE, MA 02139 USA
SN 2451-9448
J9 CELL CHEM BIOL
JI Cell Chem. Biol.
PD JUL 15
PY 2021
VL 28
IS 7
BP 889
EP 902
DI 10.1016/j.chembiol.2021.03.009
PG 14
WC Biochemistry & Molecular Biology
WE Science Citation Index Expanded (SCI-EXPANDED)
SC Biochemistry & Molecular Biology
GA TK9UB
UT WOS:000674499100002
PM 33831368
OA Green Accepted
DA 2022-04-10
ER

PT J
AU Cullati, SN
   Kabeche, L
   Kettenbach, AN
   Gerber, SA
AF Cullati, Sierra N.
   Kabeche, Lilian
   Kettenbach, Arminja N.
   Gerber, Scott A.
TI A bifurcated signaling cascade of NIMA-related kinases controls distinct
   kinesins in anaphase
SO JOURNAL OF CELL BIOLOGY
LA English
DT Article
ID MITOTIC SPINDLE FORMATION; NEK7 KINASE; PASSENGER COMPLEX;
   PROTEIN-KINASES; FAMILY KINASE; CANCER-CELLS; CYTOKINESIS;
   PHOSPHORYLATION; CENTROSOME; CHECKPOINT
AB In mitosis, cells undergo a precisely orchestrated series of spatiotemporal changes in cytoskeletal structure to divide their genetic material. These changes are coordinated by a sophisticated network of protein-protein interaction and post-translational modification. In this study, we report a bifurcation in a signaling cascade of the NIMA-related kinases (Neks) Nek6, Nek7, and Nek9 that is required for the localization and function of two kinesins essential for cytokinesis, Mklp2 and Kif14. We demonstrate that a Nek9, Nek6, and Mklp2 signaling module controls the timely localization and bundling activity of Mklp2 at the anaphase central spindle. We further show that a separate Nek9, Nek7, and Kif14 signaling module is required for the recruitment of the Rho-interacting kinase citron to the anaphase midzone. Our findings uncover an anaphase-specific function for these effector kinesins that is controlled by specific Nek kinase signaling modules to properly coordinate cytokinesis.
C1 [Cullati, Sierra N.; Kabeche, Lilian; Kettenbach, Arminja N.; Gerber, Scott A.] Geisel Sch Med Dartmouth, Dept Biochem & Cell Biol, Lebanon, NH 03766 USA.
   [Gerber, Scott A.] Geisel Sch Med Dartmouth, Dept Mol & Syst Biol, Lebanon, NH 03766 USA.
   [Kettenbach, Arminja N.; Gerber, Scott A.] Dartmouth Hitchcock Med Ctr, Norris Cotton Canc Ctr, Lebanon, NH 03766 USA.
RP Gerber, SA (corresponding author), Geisel Sch Med Dartmouth, Dept Biochem & Cell Biol, Lebanon, NH 03766 USA.; Gerber, SA (corresponding author), Geisel Sch Med Dartmouth, Dept Mol & Syst Biol, Lebanon, NH 03766 USA.; Gerber, SA (corresponding author), Dartmouth Hitchcock Med Ctr, Norris Cotton Canc Ctr, Lebanon, NH 03766 USA.
EM scott.a.gerber@dartmouth.edu
OI Kettenbach, Arminja/0000-0003-3979-4576; Cullati,
   Sierra/0000-0001-6477-0459; Kabeche, Lilian/0000-0001-9917-856X; Gerber,
   Scott/0000-0002-2964-5051
FU National Institutes of HealthUnited States Department of Health & Human
   ServicesNational Institutes of Health (NIH) - USA [P20-GM103413,
   S10-OD016212, R01-CA155260, R35-GM119455]; Dartmouth College Molecular
   and Cellular Biology training grant [T32-GM008704]; NATIONAL CANCER
   INSTITUTEUnited States Department of Health & Human ServicesNational
   Institutes of Health (NIH) - USANIH National Cancer Institute (NCI)
   [R01CA155260] Funding Source: NIH RePORTER; NATIONAL INSTITUTE OF
   GENERAL MEDICAL SCIENCESUnited States Department of Health & Human
   ServicesNational Institutes of Health (NIH) - USANIH National Institute
   of General Medical Sciences (NIGMS) [P20GM103413, P20GM113132,
   R35GM119455, T32GM008704] Funding Source: NIH RePORTER; OFFICE OF THE
   DIRECTOR, NATIONAL INSTITUTES OF HEALTHUnited States Department of
   Health & Human ServicesNational Institutes of Health (NIH) - USA
   [S10OD016212] Funding Source: NIH RePORTER
FX This work was supported by National Institutes of Health grants
   P20-GM103413 [Project 1], S10-OD016212, and R01-CA155260 to S.A. Gerber
   and R35-GM119455 to A.N. Kettenbach, and the Dartmouth College Molecular
   and Cellular Biology training grant T32-GM008704 to support S.N.
   Cullati.
CR Andreassen PR, 2001, MOL BIOL CELL, V12, P1315, DOI 10.1091/mbc.12.5.1315
   Baker CL, 2009, MOL CELL, V34, P354, DOI 10.1016/j.molcel.2009.04.023
   Barr FA, 2007, CELL, V131, P847, DOI 10.1016/j.cell.2007.11.011
   Bassi ZI, 2013, P NATL ACAD SCI USA, V110, P9782, DOI 10.1073/pnas.1301328110
   Belham C, 2003, J BIOL CHEM, V278, P34897, DOI 10.1074/jbc.M303663200
   Carmena M, 2003, NAT REV MOL CELL BIO, V4, P842, DOI 10.1038/nrm1245
   Castedo M, 2006, ANN NY ACAD SCI, V1090, P35, DOI 10.1196/annals.1378.004
   Choi SH, 2010, GENE DEV, V24, P1236, DOI 10.1101/gad.1920310
   Cromey DW, 2010, SCI ENG ETHICS, V16, P639, DOI 10.1007/s11948-010-9201-y
   Evangelista M, 2008, SCI SIGNAL, V1, DOI 10.1126/scisignal.1162925
   Fry AM, 2012, J CELL SCI, V125, P4423, DOI 10.1242/jcs.111195
   Ganem NJ, 2009, NATURE, V460, P278, DOI 10.1038/nature08136
   Glotzer M, 2009, NAT REV MOL CELL BIO, V10, P9, DOI 10.1038/nrm2609
   Green RA, 2012, ANNU REV CELL DEV BI, V28, P29, DOI 10.1146/annurev-cellbio-101011-155718
   Gruneberg U, 2004, J CELL BIOL, V166, P167, DOI 10.1083/jcb.200403084
   Gruneberg U, 2006, J CELL BIOL, V172, P363, DOI 10.1083/jcb.200511061
   Harper JW, 2001, CHEM REV, V101, P2511, DOI 10.1021/cr0001030
   Hood EA, 2012, MOL BIOL CELL, V23, P2264, DOI 10.1091/mbc.E11-12-1013
   Hummer S, 2009, CURR BIOL, V19, P607, DOI 10.1016/j.cub.2009.02.046
   Kaneta Y, 2013, BIOCHEM BIOPH RES CO, V442, P139, DOI 10.1016/j.bbrc.2013.04.105
   Kettenbach AN, 2011, SCI SIGNAL, V4, DOI 10.1126/scisignal.2001497
   Kim S, 2007, BIOCHEM BIOPH RES CO, V360, P56, DOI 10.1016/j.bbrc.2007.05.206
   Kitagawa M, 2014, CELL REP, V7, P166, DOI 10.1016/j.celrep.2014.02.034
   Krzywicka-Racka A, 2011, J CELL BIOL, V194, P199, DOI 10.1083/jcb.201101073
   Lanni JS, 1998, MOL CELL BIOL, V18, P1055, DOI 10.1128/MCB.18.2.1055
   Laurell E, 2011, CELL, V144, P539, DOI 10.1016/j.cell.2011.01.012
   Lyons PD, 2009, BIOSCIENCE REP, V29, P229, DOI 10.1042/BSR20080162
   Mahjoub MR, 2004, MOL BIOL CELL, V15, P5172, DOI 10.1091/mbc.E04-07-0571
   Maliga Z, 2013, NAT CELL BIOL, V15, P325, DOI 10.1038/ncb2689
   Minn AJ, 1996, GENE DEV, V10, P2621, DOI 10.1101/gad.10.20.2621
   Musacchio A, 2007, NAT REV MOL CELL BIO, V8, P379, DOI 10.1038/nrm2163
   Neef R, 2003, J CELL BIOL, V162, P863, DOI 10.1083/jcb.200306009
   Nigg EA, 2001, NAT REV MOL CELL BIO, V2, P21, DOI 10.1038/35048096
   O'Regan L, 2007, CELL DIV, V2, DOI 10.1186/1747-1028-2-25
   O'Regan L, 2015, J CELL BIOL, V209, P349, DOI 10.1083/jcb.201409151
   O'Regan L, 2009, MOL CELL BIOL, V29, P3975, DOI 10.1128/MCB.01867-08
   Rapley J, 2008, J CELL SCI, V121, P3912, DOI 10.1242/jcs.035360
   Richards MW, 2009, MOL CELL, V36, P560, DOI 10.1016/j.molcel.2009.09.038
   Rieder CL, 2011, CHROMOSOME RES, V19, P291, DOI 10.1007/s10577-010-9178-z
   Roig J, 2005, MOL BIOL CELL, V16, P4827, DOI 10.1091/mbc.E05-04-0315
   Roig J, 2002, GENE DEV, V16, P1640, DOI 10.1101/gad.972202
   Salem H, 2010, ONCOGENE, V29, P4046, DOI 10.1038/onc.2010.162
   Sdelci S, 2012, CURR BIOL, V22, P1516, DOI 10.1016/j.cub.2012.06.027
   Shalom O, 2008, FEBS LETT, V582, P1465, DOI 10.1016/j.febslet.2008.03.036
   Bertran MT, 2011, EMBO J, V30, P2634, DOI 10.1038/emboj.2011.179
   Yissachar N, 2006, FEBS LETT, V580, P6489, DOI 10.1016/j.febslet.2006.10.069
   Yore MM, 2011, PLOS ONE, V6, DOI 10.1371/journal.pone.0022862
   Zalli D, 2012, HUM MOL GENET, V21, P1155, DOI 10.1093/hmg/ddr544
   Zhang AD, 2012, EUKARYOT CELL, V11, P874, DOI 10.1128/EC.00095-12
NR 49
TC 15
Z9 17
U1 0
U2 6
PU ROCKEFELLER UNIV PRESS
PI NEW YORK
PA 950 THIRD AVE, 2ND FLR, NEW YORK, NY 10022 USA
SN 0021-9525
EI 1540-8140
J9 J CELL BIOL
JI J. Cell Biol.
PD AUG
PY 2017
VL 216
IS 8
BP 2339
EP 2354
DI 10.1083/jcb.201512055
PG 16
WC Cell Biology
WE Science Citation Index Expanded (SCI-EXPANDED)
SC Cell Biology
GA FC8FV
UT WOS:000407078100016
PM 28630147
OA Green Published, hybrid
DA 2022-04-10
ER

PT J
AU Anborgh, PH
   Mutrie, JC
   Tuck, AB
   Chambers, AF
AF Anborgh, Pieter H.
   Mutrie, Jennifer C.
   Tuck, Alan B.
   Chambers, Ann F.
TI Role of the metastasis-promoting protein osteopontin in the tumour
   microenvironment
SO JOURNAL OF CELLULAR AND MOLECULAR MEDICINE
LA English
DT Review
DE osteopontin; tumour microenvironment; bone microenvironment; metastasis;
   angiogenesis
ID ENDOTHELIAL GROWTH-FACTOR; MAMMARY EPITHELIAL-CELLS; BREAST-CANCER
   MALIGNANCY; HEPATOCELLULAR-CARCINOMA; prostate cancer; SECRETED
   PHOSPHOPROTEIN; MACROPHAGES PROMOTE; ADHESIVE PROPERTIES; PLASMA
   OSTEOPONTIN; BONE SIALOPROTEIN
AB Osteopontin (OPN) is a secreted protein present in bodily fluids and tissues. It is subject to multiple post-translational modification, including phosphorylation, glycosylation, proteolytic cleavage and crosslinking by transglutamination. Binding of OPN to integrin and CD44 receptors regulates signalling cascades that affect processes such as adhesion, migration, invasion, chemotaxis and cell survival. A variety of cells and tissues express OPN, including bone, vasculature, kidney, inflammatory cells and numerous secretory epithelia. Normal physiological roles include regulation of immune functions, vascular remodelling, wound repair and developmental processes. OPN also is expressed in many cancers, and elevated levels in patients' tumour tissue and blood are associated with poor prognosis. Tumour growth is regulated by interactions between tumour cells and their tissue microenvironment. Within a tumour mass, OPN can be expressed by both tumour cells and cellular components of the tumour microenvironment, and both tumour and normal cells may have receptors able to bind to OPN. OPN can also be found as a component of the extracellular matrix. The functional roles of OPN in a tumour are thus complex, with OPN secreted by both tumour cells and cells in the tumour microenvironment, both of which can in turn respond to OPN. Much remains to be learned about the cross-talk between normal and tumour cells within a tumour, and the role of multiple forms of OPN in these interactions. Understanding OPN-mediated interactions within a tumour will be important for the development of therapeutic strategies to target OPN.
C1 [Anborgh, Pieter H.; Mutrie, Jennifer C.; Tuck, Alan B.; Chambers, Ann F.] London Reg Canc Program, London, ON N6A 4L6, Canada.
   [Mutrie, Jennifer C.; Tuck, Alan B.; Chambers, Ann F.] Univ Western Ontario, Dept Pathol, London, ON, Canada.
   [Tuck, Alan B.] London Hlth Sci Ctr, Dept Pathol, London, ON, Canada.
   [Tuck, Alan B.; Chambers, Ann F.] Univ Western Ontario, Dept Oncol, London, ON, Canada.
RP Chambers, AF (corresponding author), London Reg Canc Program, 790 Commissioners Rd E, London, ON N6A 4L6, Canada.
EM ann.chambers@Lhsc.on.ca
RI Chambers, Ann F/L-6285-2015
OI Chambers, Ann F/0000-0002-9509-5123
FU Lloyd Carr-Harris Foundation; Canadian Institutes of Health
   ResearchCanadian Institutes of Health Research (CIHR); Translational
   Breast Cancer Research Unit; Canada Research ChairsCanada Research
   ChairsCGIAR
FX This work is supported by an award from the Lloyd Carr-Harris
   Foundation. J.C.M. is supported by a Canadian Graduate Award from
   Canadian Institutes of Health Research and a Studentship from the
   Translational Breast Cancer Research Unit at the London Regional Cancer
   Program. A.F.C. is Canada Research Chair in Oncology, supported by the
   Canada Research Chairs Program.
CR Agnihotri R, 2001, J BIOL CHEM, V276, P28261, DOI 10.1074/jbc.M103608200
   Agrawal D, 2002, J NATL CANCER I, V94, P513
   Al-Shami R, 2005, J CELL BIOCHEM, V94, P1218, DOI 10.1002/jcb.20379
   Allan AL, 2006, AM J PATHOL, V169, P233, DOI 10.2353/ajpath.2006.051152
   Anborgh PH, 2009, CLIN CHEM, V55, P895, DOI 10.1373/clinchem.2008.117465
   Anderberg C, 2009, CANCER RES, V69, P369, DOI 10.1158/0008-5472.CAN-08-2724
   Bai Y, 2009, MODERN PATHOL, V22, P887, DOI 10.1038/modpathol.2009.38
   Balkwill F, 2001, LANCET, V357, P539, DOI 10.1016/S0140-6736(00)04046-0
   BELLAHCENE A, 1995, AM J PATHOL, V146, P95
   Bellahcene A, 2008, NAT REV CANCER, V8, P212, DOI 10.1038/nrc2345
   Bhowmick NA, 2004, NATURE, V432, P332, DOI 10.1038/nature03096
   Blasberg JD, 2010, J THORAC CARDIOV SUR, V139, P1587, DOI 10.1016/j.jtcvs.2009.08.016
   Bostrom K, 2007, CARDIOVASC RES, V75, P634, DOI 10.1016/j.cardiores.2007.06.031
   Bourassa B, 2004, CELL IMMUNOL, V227, P1, DOI 10.1016/j.cellimm.2004.01.001
   Bramwell VHC, 2005, CANCER BIOL THER, V4, P1336, DOI 10.4161/cbt.4.12.2166
   BROWN LF, 1994, AM J PATHOL, V145, P610
   Carlinfante G, 2003, CLIN EXP METASTAS, V20, P437, DOI 10.1023/A:1025419708343
   Casson AG, 1997, INT J CANCER, V72, P739, DOI 10.1002/(SICI)1097-0215(19970904)72:5<739::AID-IJC6>3.0.CO;2-T
   Chakraborty G, 2008, CANCER RES, V68, P152, DOI 10.1158/0008-5472.CAN-07-2126
   Chambers AF, 1996, LUNG CANCER-J IASLC, V15, P311, DOI 10.1016/0169-5002(95)00595-1
   Chang PL, 2008, J HISTOCHEM CYTOCHEM, V56, P57, DOI 10.1369/jhc.7A7325.2007
   Chellaiah MA, 2003, MOL BIOL CELL, V14, P173, DOI 10.1091/mbc.E02-06-0354
   Cheng JS, 2007, CANCER RES, V67, P5141, DOI 10.1158/0008-5472.CAN-06-4763
   Chien CY, 2009, ORAL ONCOL, V45, P798, DOI 10.1016/j.oraloncology.2008.12.006
   Cho HJ, 2009, CURR ATHEROSCLER REP, V11, P206, DOI 10.1007/s11883-009-0032-8
   Christensen B, 2008, BIOCHEM J, V411, P53, DOI 10.1042/BJ20071021
   Christensen B, 2007, J BIOL CHEM, V282, P19463, DOI 10.1074/jbc.M703055200
   Cook AC, 2006, J BIOL CHEM, V281, P24381, DOI 10.1074/jbc.M602694200
   Coppola D, 2004, CLIN CANCER RES, V10, P184, DOI 10.1158/1078-0432.CCR-1405-2
   Crawford HC, 1998, CANCER RES, V58, P5206
   Dai J, 2009, ONCOGENE, V28, P3412, DOI 10.1038/onc.2009.189
   De Wever O, 2008, INT J CANCER, V123, P2229, DOI 10.1002/ijc.23925
   DENHARDT DT, 1994, J CELL BIOCHEM, V56, P48, DOI 10.1002/jcb.240560109
   Diao HY, 2008, P NATL ACAD SCI USA, V105, P15884, DOI 10.1073/pnas.0806089105
   Du XL, 2008, INT J MOL MED, V22, P619, DOI 10.3892/ijmm_00000064
   FENG B, 1995, CLIN EXP METASTAS, V13, P453, DOI 10.1007/BF00118184
   Finak G, 2008, NAT MED, V14, P518, DOI 10.1038/nm1764
   Forootan SS, 2006, INT J CANCER, V118, P2255, DOI 10.1002/ijc.21619
   FRANZEN A, 1985, BIOCHEM J, V232, P715, DOI 10.1042/bj2320715
   Furger KA, 2003, MOL CANCER RES, V1, P810
   Gaumann A, 2001, VIRCHOWS ARCH, V439, P668, DOI 10.1007/s004280100452
   Gotoh M, 2002, PATHOL INT, V52, P19, DOI 10.1046/j.1440-1827.2002.01316.x
   Hanahan D, 1996, CELL, V86, P353, DOI 10.1016/S0092-8674(00)80108-7
   He B, 2006, ONCOGENE, V25, P2192, DOI 10.1038/sj.onc.1209248
   HEINEGARD D, 1995, ANN NY ACAD SCI, V760, P213, DOI 10.1111/j.1749-6632.1995.tb44632.x
   Higashikawa F, 2007, FEBS LETT, V581, P2697, DOI 10.1016/j.febslet.2007.05.018
   HIROTA S, 1995, J NEUROPATH EXP NEUR, V54, P698, DOI 10.1097/00005072-199509000-00012
   Ibrahim T, 2000, CLIN EXP METASTAS, V18, P253, DOI 10.1023/A:1006754605901
   Imano M, 2009, J GASTROINTEST SURG, V13, P1577, DOI 10.1007/s11605-009-0955-y
   Kaarteenaho R, 2010, APMIS, V118, P91, DOI 10.1111/j.1600-0463.2009.02566.x
   Kalluri R, 2006, NAT REV CANCER, V6, P392, DOI 10.1038/nrc1877
   Kang YB, 2003, CANCER CELL, V3, P537, DOI 10.1016/S1535-6108(03)00132-6
   Kazanecki CC, 2007, J CELL BIOCHEM, V102, P912, DOI 10.1002/jcb.21558
   Kim J, 2006, AM J GASTROENTEROL, V101, P2051, DOI 10.1111/j.1572-0241.2006.00679.x
   KUBOTA T, 1989, BIOCHEM BIOPH RES CO, V162, P1453, DOI 10.1016/0006-291X(89)90837-1
   Kuroda N, 2007, MED MOL MORPHOL, V40, P218, DOI 10.1007/s00795-007-0348-9
   Larkin J, 2006, J IMMUNOL, V177, P268, DOI 10.4049/jimmunol.177.1.268
   Leali D, 2003, J IMMUNOL, V171, P1085, DOI 10.4049/jimmunol.171.2.1085
   Lenga Y, 2008, CIRC RES, V102, P319, DOI 10.1161/CIRCRESAHA.107.160408
   Li HC, 2007, J CELL BIOCHEM, V101, P805, DOI 10.1002/jcb.21159
   Lu CH, 2007, CANCER RES, V67, P1757, DOI 10.1158/0008-5472.CAN-06-3700
   Maki M, 2000, PATHOL INT, V50, P531, DOI 10.1046/j.1440-1827.2000.01075.x
   McAllister SS, 2008, CELL, V133, P994, DOI 10.1016/j.cell.2008.04.045
   Modolo F, 2010, J ORAL PATHOL MED, V39, P230, DOI 10.1111/j.1600-0714.2009.00846.x
   Nemoto H, 2001, J BONE MINER RES, V16, P652, DOI 10.1359/jbmr.2001.16.4.652
   Oyama T, 2002, VIRCHOWS ARCH, V440, P267, DOI 10.1007/s004280100501
   Pass HI, 2005, NEW ENGL J MED, V353, P1564, DOI 10.1056/NEJMoa051185
   PATARCA R, 1989, J EXP MED, V170, P145, DOI 10.1084/jem.170.1.145
   Patsialou A, 2009, CANCER RES, V69, P9498, DOI 10.1158/0008-5472.CAN-09-1868
   Pazolli E, 2009, CANCER RES, V69, P1230, DOI 10.1158/0008-5472.CAN-08-2970
   Pereira RO, 2006, IN VITRO CELL DEV-AN, V42, P4
   Pollard JW, 2004, NAT REV CANCER, V4, P71, DOI 10.1038/nrc1256
   Polyak K, 2009, TRENDS GENET, V25, P30, DOI 10.1016/j.tig.2008.10.012
   Rangaswami H, 2006, TRENDS CELL BIOL, V16, P79, DOI 10.1016/j.tcb.2005.12.005
   REINHOLT FP, 1990, P NATL ACAD SCI USA, V87, P4473, DOI 10.1073/pnas.87.12.4473
   Rittling SR, 2004, BRIT J CANCER, V90, P1877, DOI 10.1038/sj.bjc.6601839
   Rittling SR, 2002, J BIOL CHEM, V277, P9175, DOI 10.1074/jbc.M109028200
   Saeki Y, 2003, BRIT J HAEMATOL, V123, P263, DOI 10.1046/j.1365-2141.2003.04589.x
   Schulze EB, 2008, BREAST CANCER RES TR, V112, P243, DOI 10.1007/s10549-007-9865-4
   Schwertfeger KL, 2006, CANCER RES, V66, P5676, DOI 10.1158/0008-5472.CAN-05-3781
   SENGER DR, 1994, MOL BIOL CELL, V5, P565, DOI 10.1091/mbc.5.5.565
   SENGER DR, 1989, ANTICANCER RES, V9, P1291
   Shevde LA, 2010, CURR MOL MED, V10, P71, DOI 10.2174/156652410791065381
   Shih J-Y, 2006, J CANC MOL, V2, P101
   Shijubo N, 1999, AM J RESP CRIT CARE, V160, P1269, DOI 10.1164/ajrccm.160.4.9807094
   Shijubo N, 2000, CRIT REV ONCOGENESIS, V11, P135
   Sullivan J, 2009, SURGERY, V146, P232, DOI 10.1016/j.surg.2009.03.036
   Sulzbacher I, 2002, VIRCHOWS ARCH, V441, P345, DOI 10.1007/s00428-002-0671-4
   Takafuji V, 2007, ONCOGENE, V26, P6361, DOI 10.1038/sj.onc.1210463
   Takahashi F, 2002, INT J CANCER, V98, P707, DOI 10.1002/ijc.10261
   Terabe M, 2007, TRENDS IMMUNOL, V28, P491, DOI 10.1016/j.it.2007.05.008
   Tuck AB, 2003, ONCOGENE, V22, P1198, DOI 10.1038/sj.onc.1206209
   Tuck AB, 2000, J CELL BIOCHEM, V78, P465, DOI 10.1002/1097-4644(20000901)78:3<465::AID-JCB11>3.0.CO;2-C
   Tuck AB, 1999, ONCOGENE, V18, P4237, DOI 10.1038/sj.onc.1202799
   Tuck AB, 1998, INT J CANCER, V79, P502, DOI 10.1002/(SICI)1097-0215(19981023)79:5<502::AID-IJC10>3.3.CO;2-#
   Tuck AB, 2007, J CELL BIOCHEM, V102, P859, DOI 10.1002/jcb.21520
   Wai PY, 2006, SURGERY, V140, P132, DOI 10.1016/j.surg.2006.02.005
   Wang J, 2006, INT J MOL MED, V17, P849
   Wang X, 2010, RADIOLOGY, V254, P69, DOI 10.1148/radiol.2541090675
   Wang-Rodriguez J, 2003, BREAST CANCER RES, V5, pR136, DOI 10.1186/bcr620
   Weber GF, 2001, BBA-REV CANCER, V1552, P61, DOI 10.1016/S0304-419X(01)00037-3
   Weismann D, 2009, J PATHOL, V218, P232, DOI 10.1002/path.2528
   XUAN JW, 1994, J CELL BIOCHEM, V54, P247, DOI 10.1002/jcb.240540213
   Ye QH, 2003, NAT MED, V9, P416, DOI 10.1038/nm843
   Yoneda T, 1997, HISTOL HISTOPATHOL, V12, P1145
   Zhang HX, 2007, ANAL CHIM ACTA, V581, P268, DOI 10.1016/j.aca.2006.08.017
   Zhang J, 2001, CANCER LETT, V171, P215, DOI 10.1016/S0304-3835(01)00607-3
NR 107
TC 135
Z9 144
U1 0
U2 25
PU WILEY
PI HOBOKEN
PA 111 RIVER ST, HOBOKEN 07030-5774, NJ USA
EI 1582-4934
J9 J CELL MOL MED
JI J. Cell. Mol. Med.
PD AUG
PY 2010
VL 14
IS 8
BP 2037
EP 2044
DI 10.1111/j.1582-4934.2010.01115.x
PG 8
WC Cell Biology; Medicine, Research & Experimental
WE Science Citation Index Expanded (SCI-EXPANDED)
SC Cell Biology; Research & Experimental Medicine
GA 656FU
UT WOS:000282313300001
PM 20597997
OA Green Published
DA 2022-04-10
ER

PT J
AU Henegouwen, PMPVE
AF Henegouwen, Paul M. P. van Bergen En
TI Eps15: a multifunctional adaptor protein regulating intracellular
   trafficking
SO CELL COMMUNICATION AND SIGNALING
LA English
DT Review
ID GROWTH-FACTOR RECEPTOR; TYROSINE KINASE SUBSTRATE; CLATHRIN-COATED PITS;
   UBIQUITIN-INTERACTING MOTIF; HOMOLOGY EH DOMAIN; ENDOCYTIC PROTEINS;
   MEDIATED ENDOCYTOSIS; EGF RECEPTORS; PLASMA-MEMBRANE; ACUTE LEUKEMIAS
AB Over expression of receptor tyrosine kinases is responsible for the development of a wide variety of malignancies. Termination of growth factor signaling is primarily determined by the down regulation of active growth factor/receptor complexes. In recent years, considerable insight has been gained in the endocytosis and degradation of growth factor receptors. A crucial player in this process is the EGFR Protein tyrosine kinase Substrate #15, or Eps15. This protein functions as a scaffolding adaptor protein and is involved both in secretion and endocytosis. Eps15 has been shown to bind to AP-1 and AP-2 complexes, to bind to inositol lipids and to several other proteins involved in the regulation of intracellular trafficking. In addition, Eps15 has been detected in the nucleus of mammalian cells. Activation of growth factor receptors induces tyrosine phosphorylation and mono-ubiquitination of Eps15. The role of these post translational modifications of Eps15 is still a mystery. It is proposed that Eps15 and its family members Eps15R and Eps15b are involved in the regulation of membrane morphology, which is required for intracellular vesicle formation and trafficking.
C1 Univ Utrecht, Inst Biomembranes, NL-3508 TC Utrecht, Netherlands.
RP Henegouwen, PMPVE (corresponding author), Univ Utrecht, Inst Biomembranes, NL-3508 TC Utrecht, Netherlands.
EM p.vanbergen@uu.nl
RI van Bergen en Henegouwen, Paul/B-8870-2011
OI van Bergen en Henegouwen, Paul/0000-0001-6050-9042
CR Adams A, 2000, J BIOL CHEM, V275, P27414
   Bache KG, 2003, J BIOL CHEM, V278, P12513, DOI 10.1074/jbc.M210843200
   Baillat G, 2002, J BIOL CHEM, V277, P18961, DOI 10.1074/jbc.M108818200
   Bakowska JC, 2005, BIOCHEM BIOPH RES CO, V334, P1042, DOI 10.1016/j.bbrc.2005.06.201
   Bakowska JC, 2007, MOL BIOL CELL, V18, P1683, DOI 10.1091/mbc.E06-09-0833
   Benmerah A, 1999, J CELL SCI, V112, P1303
   Benmerah A, 1996, J BIOL CHEM, V271, P12111, DOI 10.1074/jbc.271.20.12111
   Benmerah A, 1995, J CELL BIOL, V131, P1831, DOI 10.1083/jcb.131.6.1831
   Benmerah A, 2000, J BIOL CHEM, V275, P3288, DOI 10.1074/jbc.275.5.3288
   Carbone R, 1997, CANCER RES, V57, P5498
   Chaineau M, 2008, J BIOL CHEM, V283, P34365, DOI 10.1074/jbc.M804587200
   Chen H, 1998, NATURE, V394, P793, DOI 10.1038/29555
   Chi S, 2008, MOL BIOL CELL, V19, P3564, DOI 10.1091/mbc.E07-10-0997
   Coda L, 1998, J BIOL CHEM, V273, P3003, DOI 10.1074/jbc.273.5.3003
   Confalonieri S, 2000, J CELL BIOL, V150, P905, DOI 10.1083/jcb.150.4.905
   Confalonieri S, 2002, FEBS LETT, V513, P24, DOI 10.1016/S0014-5793(01)03241-0
   Cupers P, 1998, J BIOL CHEM, V273, P1847, DOI 10.1074/jbc.273.4.1847
   Cupers P, 1997, J BIOL CHEM, V272, P33430, DOI 10.1074/jbc.272.52.33430
   Daumke O, 2007, NATURE, V449, P923, DOI 10.1038/nature06173
   de Beer T, 2000, NAT STRUCT BIOL, V7, P1018, DOI 10.1038/80924
   de Melker AA, 2004, J CELL SCI, V117, P5001, DOI 10.1242/jcs.01354
   Doria M, 1999, J CELL BIOL, V147, P1379, DOI 10.1083/jcb.147.7.1379
   Fallon L, 2006, NAT CELL BIOL, V8, P834, DOI 10.1038/ncb1441
   FAZIOLI F, 1993, MOL CELL BIOL, V13, P5814, DOI 10.1128/MCB.13.9.5814
   Ford MGJ, 2002, NATURE, V419, P361, DOI 10.1038/nature01020
   Grant BD, 2008, TRAFFIC, V9, P2043, DOI 10.1111/j.1600-0854.2008.00834.x
   Haffner C, 1997, FEBS LETT, V419, P175, DOI 10.1016/S0014-5793(97)01451-8
   Heir R, 2006, EMBO REP, V7, P1252, DOI 10.1038/sj.embor.7400823
   Hirano S, 2006, NAT STRUCT MOL BIOL, V13, P272, DOI 10.1038/nsmb1051
   Hoeller D, 2006, NAT CELL BIOL, V8, P163, DOI 10.1038/ncb1354
   Hofmann K, 2001, TRENDS BIOCHEM SCI, V26, P347, DOI 10.1016/S0968-0004(01)01835-7
   Huang F, 2007, P NATL ACAD SCI USA, V104, P16904, DOI 10.1073/pnas.0707416104
   Huang FT, 2004, J BIOL CHEM, V279, P16657, DOI 10.1074/jbc.C400046200
   Hyman J, 2000, J CELL BIOL, V149, P537, DOI 10.1083/jcb.149.3.537
   Jovic M, 2009, MOL BIOL CELL, V20, P2731, DOI 10.1091/mbc.E08-11-1102
   Kazazic M, 2009, TRAFFIC, V10, P235, DOI 10.1111/j.1600-0854.2008.00858.x
   Kent HM, 2002, STRUCTURE, V10, P1139, DOI 10.1016/S0969-2126(02)00801-8
   Klapisz E, 2002, J BIOL CHEM, V277, P30746, DOI 10.1074/jbc.M203004200
   Levkowitz G, 1998, GENE DEV, V12, P3663, DOI 10.1101/gad.12.23.3663
   Martina JA, 2001, J CELL BIOL, V153, P1111, DOI 10.1083/jcb.153.5.1111
   McGill MA, 2003, J BIOL CHEM, V278, P23196, DOI 10.1074/jbc.M302827200
   MCGILL MA, 2009, J BIOL CHEM
   Mendelsohn J, 2003, J CLIN ONCOL, V21, P2787, DOI 10.1200/JCO.2003.01.504
   Meyer C, 2009, LEUKEMIA, V23, P1490, DOI 10.1038/leu.2009.33
   Mosesson Y, 2003, J BIOL CHEM, V278, P21323, DOI 10.1074/jbc.C300096200
   Mosesson Y, 2008, NAT REV CANCER, V8, P835, DOI 10.1038/nrc2521
   MURAKAMI T, 2009, J BIOL CHEM
   N'Diaye EN, 2009, EMBO REP, V10, P173, DOI 10.1038/embor.2008.238
   Nakashima S, 1999, EMBO J, V18, P3629, DOI 10.1093/emboj/18.13.3629
   Naslavsky N, 2007, J BIOL CHEM, V282, P16612, DOI 10.1074/jbc.M609493200
   Ono R, 2002, CANCER RES, V62, P4075
   Page LJ, 1999, J CELL BIOL, V146, P993, DOI 10.1083/jcb.146.5.993
   Parachoniak CA, 2009, J BIOL CHEM, V284, P8382, DOI 10.1074/jbc.M807607200
   Pilecka I, 2007, EUR J CELL BIOL, V86, P533, DOI 10.1016/j.ejcb.2007.04.004
   Polo S, 2002, NATURE, V416, P451, DOI 10.1038/416451a
   Poupon V, 2002, J BIOL CHEM, V277, P8941, DOI 10.1074/jbc.M108385200
   Regan-Klapisz E, 2005, J CELL SCI, V118, P4437, DOI 10.1242/jcs.02571
   Rogaia D, 1997, CANCER RES, V57, P799
   Roxrud I, 2008, J CELL BIOL, V180, P1205, DOI 10.1083/jcb.200708115
   Salcini AE, 1997, GENE DEV, V11, P2239, DOI 10.1101/gad.11.17.2239
   Santonico Elena, 2007, BMC Biochemistry, V8, P29, DOI 10.1186/1471-2091-8-29
   SCHUMACHER C, 1995, J BIOL CHEM, V270, P15341, DOI 10.1074/jbc.270.25.15341
   Sengar AS, 1999, EMBO J, V18, P1159, DOI 10.1093/emboj/18.5.1159
   Sigismund S, 2005, P NATL ACAD SCI USA, V102, P2760, DOI 10.1073/pnas.0409817102
   So CW, 2003, CANCER CELL, V4, P99, DOI 10.1016/S1535-6108(03)00188-0
   So CW, 2000, LEUKEMIA, V14, P594, DOI 10.1038/sj.leu.2401692
   Stang E, 2004, MOL BIOL CELL, V15, P3591, DOI 10.1091/mbc.E04-01-0041
   Tebar F, 1996, J BIOL CHEM, V271, P28727, DOI 10.1074/jbc.271.46.28727
   Torrisi MR, 1999, MOL BIOL CELL, V10, P417, DOI 10.1091/mbc.10.2.417
   Urbe S, 2006, BIOCHEM SOC T, V34, P754, DOI 10.1042/BST0340754
   vanDelft S, 1997, J BIOL CHEM, V272, P14013, DOI 10.1074/jbc.272.22.14013
   vanDelft S, 1997, J CELL BIOL, V136, P811, DOI 10.1083/jcb.136.4.811
   Vecchi M, 2001, J CELL BIOL, V153, P1511, DOI 10.1083/jcb.153.7.1511
   Wang GL, 2001, MOL CELL BIOL, V21, P3564, DOI 10.1128/MCB.21.10.3564-3575.2001
   Wang Q, 2005, EMBO REP, V6, P942, DOI 10.1038/sj.embor.7400491
   Whitehead B, 1999, BIOCHEMISTRY-US, V38, P11271, DOI 10.1021/bi990922i
   Wiley HS, 2003, EXP CELL RES, V284, P78, DOI 10.1016/S0014-4827(03)00002-8
   Williams RL, 2007, NAT REV MOL CELL BIO, V8, P355, DOI 10.1038/nrm2162
   Woelk T, 2006, NAT CELL BIOL, V8, P1246, DOI 10.1038/ncb1484
   WONG WT, 1994, ONCOGENE, V9, P1591
   WONG WT, 1995, P NATL ACAD SCI USA, V92, P9530, DOI 10.1073/pnas.92.21.9530
   Yarden Y, 2001, EUR J CANCER, V37, pS3
NR 82
TC 52
Z9 52
U1 0
U2 16
PU BMC
PI LONDON
PA CAMPUS, 4 CRINAN ST, LONDON N1 9XW, ENGLAND
SN 1478-811X
J9 CELL COMMUN SIGNAL
JI Cell Commun. Signal.
PD OCT 8
PY 2009
VL 7
AR 24
DI 10.1186/1478-811X-7-24
PG 11
WC Cell Biology
WE Science Citation Index Expanded (SCI-EXPANDED)
SC Cell Biology
GA 521OZ
UT WOS:000271932700001
PM 19814798
OA gold, Green Published
DA 2022-04-10
ER

PT J
AU Cass, SMF
   Tepe, JJ
AF Cass, Samantha M. Frawley
   Tepe, Jetze J.
TI Identification of Phosphoproteins and their Impact as Biomarkers in
   Cancer Therapeutics
SO CURRENT SIGNAL TRANSDUCTION THERAPY
LA English
DT Review
DE Phosphorylation; phosphoprotein enrichment; cancer biomarkers
ID nf-kappa b; GROWTH-FACTOR RECEPTOR; ELECTRON-CAPTURE DISSOCIATION;
   TANDEM mass spectrometry; TYROSINE PHOSPHORYLATION SITES;
   METAL-AFFINITY-CHROMATOGRAPHY; CELL LUNG-CANCER; QUANTITATIVE PROTEOMIC
   ANALYSIS; DIFFERENCE GEL-ELECTROPHORESIS; HIGHLY SELECTIVE ENRICHMENT
AB Many cellular processes are regulated by the reversible reaction of protein phosphorylation on serine, threonine and tyrosine residues. Deregulation of the signal transduction cascade upsets this well-balanced system and has been implicated in many diseases, including cancer. Identification of the proteins and post-translational modification (PTMs) involved in the breakdown of certain cell signaling pathway provide unique insight into the disease's pathology. The importance of phosphorylation on a molecular level has been implicated specifically within signaling pathway involved in the pathogenesis of cancer. Emerging phosphoproteomic technologies have proven to be valuable tools in identifying new biomarkers, which presents an opportunity to probe phosphoproteins in specific cancer related pathway for both diagnosis and therapeutic exploitation. This review will discuss the development and impact of current phosphoproteomic identification and quantification methodologies and the utility of these technologies to assist in the determination of phosphoproteins as potential biomarkers and/or drug target in cancer.
C1 [Cass, Samantha M. Frawley; Tepe, Jetze J.] Michigan State Univ, Dept Chem, E Lansing, MI 48823 USA.
RP Tepe, JJ (corresponding author), Michigan State Univ, 510 Chem Bldg, E Lansing, MI 48824 USA.
EM tepe@chemistry.msu.edu
RI Tepe, Jetze/AAV-5256-2021; Tepe, Jetze/AAB-5128-2020
OI Tepe, Jetze/0000-0001-5467-5589; 
FU National Institutes of HealthUnited States Department of Health & Human
   ServicesNational Institutes of Health (NIH) - USA [GM071549-01];
   Michigan State University HBRI
FX We would like to thank Dr. Gavin E. Reid for careful reviewing of this
   manuscript. We would also like to thank financial support provided by a
   grant from the National Institutes of Health (GM071549-01) and Michigan
   State University HBRI funds.
CR Aggarwal BB, 2006, CURR SIGNAL TRANSD T, V1, P25, DOI 10.2174/157436206775269235
   Ahn J, 2004, DNA REPAIR, V3, P1039, DOI 10.1016/j.dnarep.2004.03.033
   Ahn JW, 2003, J BIOL CHEM, V278, P20480, DOI 10.1074/jbc.M213185200
   Ahn JY, 2000, CANCER RES, V60, P5934
   ANDERSSON L, 1986, ANAL BIOCHEM, V154, P250, DOI 10.1016/0003-2697(86)90523-3
   Anrather J, 2005, J BIOL CHEM, V280, P244, DOI 10.1074/jbc.M409344200
   Arienti KL, 2005, J MED CHEM, V48, P1873, DOI 10.1021/jm0495935
   Ballif BA, 2004, MOL CELL PROTEOMICS, V3, P1093, DOI 10.1074/mcp.M400085-MCP200
   Bardelli A, 2003, CLIN CANCER RES, V9, P5607
   Bava SV, 2005, J BIOL CHEM, V280, P6301, DOI 10.1074/jbc.M410647200
   Beausoleil SA, 2004, P NATL ACAD SCI USA, V101, P12130, DOI 10.1073/pnas.0404720101
   Becker J, 2004, NAT BIOTECHNOL, V22, P15, DOI 10.1038/nbt0104-15
   Bendt AK, 2003, PROTEOMICS, V3, P1637, DOI 10.1002/pmic.200300494
   Berwick DC, 2004, TRENDS BIOCHEM SCI, V29, P227, DOI 10.1016/j.tibs.2004.03.004
   Bessette DC, 2008, CANCER METAST REV, V27, P231, DOI 10.1007/s10555-008-9121-3
   Billecke C, 2006, MOL CELL PROTEOMICS, V5, P35, DOI 10.1074/mcp.M500124-MCP200
   Biscardi JS, 1999, J BIOL CHEM, V274, P8335, DOI 10.1074/jbc.274.12.8335
   Blume-Jensen P, 2001, NATURE, V411, P355, DOI 10.1038/35077225
   Bond D, 2008, BIOL PROCED ONLINE, V10, P20, DOI 10.1251/bpo139
   Brill LM, 2004, ANAL CHEM, V76, P2763, DOI 10.1021/ac035352d
   Broxterman HJ, 2003, DRUG RESIST UPDATE, V6, P111, DOI 10.1016/S1368-7646(03)00026-8
   Bruce C, 2006, ANAL CHEM, V78, P4374, DOI 10.1021/ac060046w
   Buss H, 2004, J BIOL CHEM, V279, P55633, DOI 10.1074/jbc.M409825200
   Buss H, 2004, J BIOL CHEM, V279, P49571, DOI 10.1074/jbc.C400442200
   Campbell KJ, 2006, CANCER RES, V66, P929, DOI 10.1158/0008-5472.CAN-05-2234
   Cangi MG, 2000, J CLIN INVEST, V106, P753, DOI 10.1172/JCI9174
   Cantin GT, 2006, J PROTEOME RES, V5, P127, DOI 10.1021/pr050270m
   Carpino N, 1997, CELL, V88, P197, DOI 10.1016/S0092-8674(00)81840-1
   Chan MM, 2003, J CELL PHYSIOL, V194, P63, DOI 10.1002/jcp.10186
   Chen CT, 2007, J PROTEOME RES, V6, P316, DOI 10.1021/pr0604460
   Chen R, 2006, PROTEOMICS, V6, P3871, DOI 10.1002/pmic.200500702
   Chen X, 2000, ANAL CHEM, V72, P1134, DOI 10.1021/ac9911600
   Chowdhury SM, 2005, RAPID COMMUN MASS SP, V19, P899, DOI 10.1002/rcm.1869
   Cohen P, 2002, NAT REV DRUG DISCOV, V1, P309, DOI 10.1038/nrd773
   Collins MO, 2007, PROTEOMICS, V7, P2751, DOI 10.1002/pmic.200700145
   Connor PA, 1999, LANGMUIR, V15, P2916, DOI 10.1021/la980894p
   Coon JJ, 2004, INT J MASS SPECTROM, V236, P33, DOI 10.1016/j.ijms.2004.05.005
   Cornford PA, 2000, CANCER RES, V60, P7099
   Cory AH, 2002, ANTICANCER RES, V22, P3805
   Creese AJ, 2008, J AM SOC MASS SPECTR, V19, P1263, DOI 10.1016/j.jasms.2008.05.015
   Curman D, 2001, J BIOL CHEM, V276, P17914, DOI 10.1074/jbc.M100728200
   Cusack JC, 2000, CANCER RES, V60, P2323
   Cusack JC, 1999, DRUG RESIST UPDATE, V2, P271, DOI 10.1054/drup.1999.0094
   CUTTING JA, 1973, ANAL BIOCHEM, V54, P386, DOI 10.1016/0003-2697(73)90367-9
   CZERNIK AJ, 1991, METHOD ENZYMOL, V201, P264
   D'Ambrosio C, 2007, J CHROMATOGR B, V849, P163, DOI 10.1016/j.jchromb.2006.06.033
   Dai J, 2007, J PROTEOME RES, V6, P250, DOI 10.1021/pr0604155
   Davies H, 2002, NATURE, V417, P949, DOI 10.1038/nature00766
   Deeb D, 2004, MOL CANCER THER, V3, P803
   Demarchi F, 2003, J BIOL CHEM, V278, P39583, DOI 10.1074/jbc.M305676200
   DesboisMouthon C, 1996, METABOLISM, V45, P1493, DOI 10.1016/S0026-0495(96)90178-X
   Dobson KD, 2000, SPECTROCHIM ACTA A, V56, P557, DOI 10.1016/S1386-1425(99)00154-7
   Dubrovska A, 2005, PROTEOMICS, V5, P4678, DOI 10.1002/pmic.200500002
   Dunn JD, 2008, ANAL CHEM, V80, P5727, DOI 10.1021/ac702472j
   Dunn JD, 2006, ANAL CHEM, V78, P1574, DOI 10.1021/ac0515982
   Duran A, 2003, EMBO J, V22, P3910, DOI 10.1093/emboj/cdg370
   El-Rayes BF, 2006, CANCER RES, V66, P10553, DOI 10.1158/0008-5472.CAN-06-2333
   Etzioni R, 2003, NAT REV CANCER, V3, P243, DOI 10.1038/nrc1041
   Falisse-Poirrier N, 2006, J MICROBIOL METH, V67, P593, DOI 10.1016/j.mimet.2006.05.002
   Ficarro S, 2003, J BIOL CHEM, V278, P11579, DOI 10.1074/jbc.M202325200
   Ficarro SB, 2002, NAT BIOTECHNOL, V20, P301, DOI 10.1038/nbt0302-301
   Ficarro SB, 2008, ANAL CHEM, V80, P4606, DOI 10.1021/ac800564h
   Flick MB, 1997, ONCOGENE, V14, P2553, DOI 10.1038/sj.onc.1201092
   Gadsby DC, 1999, ADV SEC MESS PHOSPH, V33, P79
   GALAKTIONOV K, 1995, SCIENCE, V269, P1575, DOI 10.1126/science.7667636
   Garcia BA, 2005, METHODS, V35, P256, DOI 10.1016/j.ymeth.2004.08.017
   Gevaert K, 2005, PROTEOMICS, V5, P3589, DOI 10.1002/pmic.200401217
   Giorgianni F, 2007, ELECTROPHORESIS, V28, P2027, DOI 10.1002/elps.200600782
   GOEDERT M, 1995, BIOCHEM SOC T, V23, P80, DOI 10.1042/bst0230080
   Goshe MB, 2001, ANAL CHEM, V73, P2578, DOI 10.1021/ac010081x
   Graves JD, 1999, PHARMACOL THERAPEUT, V82, P111, DOI 10.1016/S0163-7258(98)00056-4
   Greten FR, 2004, CELL, V118, P285, DOI 10.1016/j.cell.2004.07.013
   Gronborg M, 2004, J PROTEOME RES, V3, P1042, DOI 10.1021/pr0499085
   Guha U, 2008, P NATL ACAD SCI USA, V105, P14112, DOI 10.1073/pnas.0806158105
   Gunasekera SP, 1996, J AM CHEM SOC, V118, P8759, DOI 10.1021/ja961961+
   Gygi SP, 1999, NAT BIOTECHNOL, V17, P994, DOI 10.1038/13690
   Han GH, 2008, PROTEOMICS, V8, P1346, DOI 10.1002/pmic.200700884
   Hanger DP, 1998, J NEUROCHEM, V71, P2465
   HATHAWAY DR, 1985, AM J PHYSIOL, V249, pC345
   Heller M, 2005, ELECTROPHORESIS, V26, P1174, DOI 10.1002/elps.200410106
   Hirao A, 2000, SCIENCE, V287, P1824, DOI 10.1126/science.287.5459.1824
   HOFFMANN I, 1994, J CELL SCI, P75
   Hou SH, 2003, J BIOL CHEM, V278, P45994, DOI 10.1074/jbc.M307971200
   Hu J, 2004, CARCINOGENESIS, V25, P1991, DOI 10.1093/carcin/bgh198
   Hu YG, 2004, NAT GENET, V36, P453, DOI 10.1038/ng1343
   HUBBARD MJ, 1993, TRENDS BIOCHEM SCI, V18, P172, DOI 10.1016/0968-0004(93)90109-Z
   Huber MA, 2004, J CLIN INVEST, V114, P569, DOI 10.1172/JCI200421358
   HUNTER T, 1991, METHOD ENZYMOL, V200, P3
   HUNTER T, 1980, P NATL ACAD SCI-BIOL, V77, P1311, DOI 10.1073/pnas.77.3.1311
   Ibanez AJ, 2007, J PROTEOME RES, V6, P3842, DOI 10.1021/pr070243r
   Ideker T, 2001, SCIENCE, V292, P929, DOI 10.1126/science.292.5518.929
   Imami K, 2008, ANAL SCI, V24, P161, DOI 10.2116/analsci.24.161
   Inoue J, 2007, CANCER SCI, V98, P268, DOI 10.1111/j.1349-7006.2007.00389.x
   Ivanov SS, 2004, MOL CELL PROTEOMICS, V3, P788, DOI 10.1074/mcp.M300130-MCP200
   Jaffe H, 1998, BIOCHEMISTRY-US, V37, P16211, DOI 10.1021/bi981264p
   Jensen SS, 2007, RAPID COMMUN MASS SP, V21, P3635, DOI 10.1002/rcm.3254
   Jiang ZX, 2008, CANCER METAST REV, V27, P263, DOI 10.1007/s10555-008-9113-3
   Jin JH, 2005, MOL BRAIN RES, V134, P119, DOI 10.1016/j.molbrainres.2004.10.003
   Jin XQ, 2008, CANCER SCI, V99, P582, DOI 10.1111/j.1349-7006.2007.00713.x
   Jones DR, 2000, ANN THORAC SURG, V70, P930, DOI 10.1016/S0003-4975(00)01635-0
   Kalume DE, 2003, CURR OPIN CHEM BIOL, V7, P64, DOI 10.1016/S1367-5931(02)00009-1
   Karin M, 2002, NAT IMMUNOL, V3, P221, DOI 10.1038/ni0302-221
   Kato H, 2004, CLIN CANCER RES, V10, P7318, DOI 10.1158/1078-0432.CCR-04-0485
   Kaufmann H, 2001, PROTEOMICS, V1, P194, DOI 10.1002/1615-9861(200102)1:2<194::AID-PROT194>3.0.CO;2-K
   Kim JE, 2005, J PROTEOME RES, V4, P1339, DOI 10.1021/pr050048h
   Kim JH, 2008, TOXICOL LETT, V178, P20, DOI 10.1016/j.toxlet.2008.01.019
   Kinoshita E, 2005, J SEP SCI, V28, P155, DOI 10.1002/jssc.200401833
   Kjeldsen F, 2007, ANALYST, V132, P768, DOI 10.1039/b701902e
   Klemm C, 2006, J MASS SPECTROM, V41, P1623, DOI 10.1002/jms.1129
   Klumpp S, 2002, CURR OPIN PHARMACOL, V2, P458, DOI 10.1016/S1471-4892(02)00176-5
   Knigh ZA, 2007, J AM CHEM SOC, V129, P11672, DOI 10.1021/ja073875n
   Knight ZA, 2003, NAT BIOTECHNOL, V21, P1047, DOI 10.1038/nbt863
   Kosaka T, 2000, ANAL CHEM, V72, P1179, DOI 10.1021/ac991067b
   Kristjansdottir K, 2008, J PROTEOME RES, V7, P2812, DOI 10.1021/pr700816k
   Kweon HK, 2006, ANAL CHEM, V78, P1743, DOI 10.1021/ac0522355
   Lang V, 2003, MOL CELL BIOL, V23, P402, DOI 10.1128/MCB.23.1.402-413.2003
   Lansdell TA, 2004, TETRAHEDRON LETT, V45, P91, DOI 10.1016/j.tetlet.2003.10.111
   Larsen MR, 2005, MOL CELL PROTEOMICS, V4, P873, DOI 10.1074/mcp.T500007-MCP200
   Larsen MR, 2001, PROTEOMICS, V1, P223
   Lawrence T, 2005, NATURE, V434, P1138, DOI 10.1038/nature03491
   Lazo JS, 2002, MOL PHARMACOL, V61, P720, DOI 10.1124/mol.61.4.720
   Lee CH, 2001, J BIOL CHEM, V276, P30537, DOI 10.1074/jbc.M104414200
   Lee HJ, 2006, CURR OPIN CHEM BIOL, V10, P42, DOI 10.1016/j.cbpa.2006.01.007
   Lee HJ, 2008, PROTEOMICS, V8, P3371, DOI 10.1002/pmic.200800111
   Lee J, 2007, MOL CELL PROTEOMICS, V6, P669, DOI 10.1074/mcp.M600218-MCP200
   Lehr S, 1999, BIOCHEMISTRY-US, V38, P151, DOI 10.1021/bi9818265
   Lehr S, 2000, BIOCHEMISTRY-US, V39, P10898, DOI 10.1021/bi000982k
   Li Y, 2008, J PROTEOME RES, V7, P2526, DOI 10.1021/pr700582z
   Li Y, 2008, PROTEOMICS, V8, P238, DOI 10.1002/pmic.200700454
   Li Y, 2007, J CHROMATOGR A, V1172, P57, DOI 10.1016/j.chroma.2007.09.062
   Li YC, 2007, ANAL CHEM, V79, P7519, DOI 10.1021/ac0711440
   Liang XQ, 2007, J AM SOC MASS SPECTR, V18, P1932, DOI 10.1016/j.jasms.2007.08.001
   Lim YP, 2005, CLIN CANCER RES, V11, P3163, DOI 10.1158/1078-0432.CCR-04-2243
   Lim YP, 2004, CLIN CANCER RES, V10, P3980, DOI 10.1158/1078-0432.CCR-03-0663
   Lim YP, 2003, MOL CANCER THER, V2, P1369
   Lind SB, 2008, J PROTEOME RES, V7, P2897, DOI 10.1021/pr8000546
   Link AJ, 1999, NAT BIOTECHNOL, V17, P676, DOI 10.1038/10890
   Liu S, 2005, RAPID COMMUN MASS SP, V19, P2747, DOI 10.1002/rcm.2105
   Loyet KM, 2005, MOL CELL PROTEOMICS, V4, P235, DOI 10.1074/mcp.R400011-MCP200
   Luttrell LM, 1997, J BIOL CHEM, V272, P4637, DOI 10.1074/jbc.272.7.4637
   Lynch TJ, 2004, NEW ENGL J MED, V350, P2129, DOI 10.1056/NEJMoa040938
   Ma ZQ, 1999, ONCOGENE, V18, P4564, DOI 10.1038/sj.onc.1202809
   Maier HJ, 2003, J BIOL CHEM, V278, P39242, DOI 10.1074/jbc.M301521200
   Manning G, 2002, SCIENCE, V298, P1912, DOI 10.1126/science.1075762
   Marienfeld R, 2001, ONCOGENE, V20, P8142, DOI 10.1038/sj.onc.1204884
   Martin AG, 2000, J BIOL CHEM, V275, P24383, DOI 10.1074/jbc.M909396199
   Martin DB, 2004, CANCER RES, V64, P347, DOI 10.1158/0008-5472.CAN-03-2062
   Martin K, 2003, PROTEOMICS, V3, P1244, DOI 10.1002/pmic.200300445
   MATSUDA H, 1990, ANAL SCI, V6, P911, DOI 10.2116/analsci.6.911
   Mattioli I, 2006, J BIOL CHEM, V281, P6175, DOI 10.1074/jbc.M508045200
   Mayo MW, 2000, BBA-REV CANCER, V1470, pM55, DOI 10.1016/S0304-419X(00)00002-0
   Mazanek M, 2007, NAT PROTOC, V2, P1059, DOI 10.1038/nprot.2006.280
   McLachlin DT, 2003, ANAL CHEM, V75, P6826, DOI 10.1021/ac034989u
   Melchionna R, 2000, NAT CELL BIOL, V2, P762, DOI 10.1038/35036406
   MEYER HE, 1986, FEBS LETT, V204, P61, DOI 10.1016/0014-5793(86)81388-6
   Miklos GLG, 2001, PROTEOMICS, V1, P30
   Mimnaugh EG, 2000, BIOCHEM PHARMACOL, V60, P1343, DOI 10.1016/S0006-2952(00)00455-X
   Mohammed S, 2008, J PROTEOME RES, V7, P1565, DOI 10.1021/pr700635a
   Montagut C, 2005, DRUG TODAY, V41, P299, DOI 10.1358/dot.2005.41.5.893706
   Moran MF, 2006, BBA-REV CANCER, V1766, P230, DOI 10.1016/j.bbcan.2006.06.002
   MOSIALOS G, 1991, MOL CELL BIOL, V11, P5867, DOI 10.1128/MCB.11.12.5867
   Munshi A, 2004, MOL CANCER THER, V3, P985
   NAIRN AC, 1982, NATURE, V299, P734, DOI 10.1038/299734a0
   Ndassa YM, 2006, J PROTEOME RES, V5, P2789, DOI 10.1021/pr0602803
   Nilsson I, 2000, Prog Cell Cycle Res, V4, P107
   Nuhse TS, 2007, PLANT J, V51, P931, DOI 10.1111/j.1365-313X.2007.03192.x
   Oda Y, 2001, NAT BIOTECHNOL, V19, P379, DOI 10.1038/86783
   Old WM, 2005, MOL CELL PROTEOMICS, V4, P1487, DOI 10.1074/mcp.M500084-MCP200
   Olsen JV, 2006, CELL, V127, P635, DOI 10.1016/j.cell.2006.09.026
   Ong SE, 2002, MOL CELL PROTEOMICS, V1, P376, DOI 10.1074/mcp.M200025-MCP200
   Orenes-Pinero E, 2007, J PROTEOME RES, V6, P4440, DOI 10.1021/pr070368w
   OTVOS L, 1994, J NEUROSCI RES, V39, P669, DOI 10.1002/jnr.490390607
   Paez JG, 2004, SCIENCE, V304, P1497, DOI 10.1126/science.1099314
   Pal M, 2006, ANAL CHEM, V78, P702, DOI 10.1021/ac0511243
   Palumbo AM, 2008, J PROTEOME RES, V7, P771, DOI 10.1021/pr0705136
   Palumbo AM, 2008, ANAL CHEM, V80, P9735, DOI 10.1021/ac801768s
   Pan CS, 2006, J PROTEOME RES, V5, P3114, DOI 10.1021/pr0600125
   Pan C, 2008, PROTEOMICS, V8, P4534, DOI 10.1002/pmic.200800105
   Paradela A, 2008, J PROTEOME RES, V7, P1809, DOI 10.1021/pr7006544
   Pathak MK, 2002, MOL CANCER THER, V1, P1255
   PELICCI G, 1992, CELL, V70, P93, DOI 10.1016/0092-8674(92)90536-L
   Peng LR, 2004, J CANCER RES CLIN, V130, P521, DOI 10.1007/s00432-004-0563-x
   Perkins ND, 2006, ONCOGENE, V25, P6717, DOI 10.1038/sj.onc.1209937
   Pinkse MWH, 2004, ANAL CHEM, V76, P3935, DOI 10.1021/ac0498617
   Pommier Y, 2006, CLIN CANCER RES, V12, P2657, DOI 10.1158/1078-0432.CCR-06-0743
   Poot AJ, 2006, PROTEOMICS, V6, P6394, DOI 10.1002/pmic.200600373
   PORATH J, 1975, NATURE, V258, P598, DOI 10.1038/258598a0
   Posewitz MC, 1999, ANAL CHEM, V71, P2883, DOI 10.1021/ac981409y
   Ptacek J, 2006, TRENDS GENET, V22, P545, DOI 10.1016/j.tig.2006.08.005
   Qian WJ, 2005, PROTEOMICS, V5, P572, DOI 10.1002/pmic.200400942
   RALL TW, 1956, J BIOL CHEM, V218, P483
   RAMASUBBU N, 1991, BIOCHEM J, V280, P341, DOI 10.1042/bj2800341
   RAVICHANDRAN KS, 1995, MOL CELL BIOL, V15, P593
   Reinders J, 2005, PROTEOMICS, V5, P4052, DOI 10.1002/pmic.200401289
   Robinson DR, 2000, ONCOGENE, V19, P5548, DOI 10.1038/sj.onc.1203957
   Rocha S, 2005, EMBO J, V24, P1157, DOI 10.1038/sj.emboj.7600608
   ROSS AH, 1981, NATURE, V294, P654, DOI 10.1038/294654a0
   Ross JS, 2004, CLIN CANCER RES, V10, P2466, DOI 10.1158/1078-0432.CCR-0543-3
   Ross PL, 2004, MOL CELL PROTEOMICS, V3, P1154, DOI 10.1074/mcp.M400129-MCP200
   Rubio MF, 2006, ONCOGENE, V25, P1367, DOI 10.1038/sj.onc.1209176
   Ruelle V, 2007, J PROTEOME RES, V6, P2168, DOI 10.1021/pr060661g
   Ruse CI, 2004, PROTEOMICS, V4, P1505, DOI 10.1002/pmic.200300682
   Rush J, 2005, NAT BIOTECHNOL, V23, P94, DOI 10.1038/nbt1046
   Rusnak Felicia, 2004, J Biomol Tech, V15, P296
   Rusnak Felicia, 2002, J Biomol Tech, V13, P228
   Ryo A, 2003, MOL CELL, V12, P1413, DOI 10.1016/S1097-2765(03)00490-8
   Sakurai H, 1999, J BIOL CHEM, V274, P30353, DOI 10.1074/jbc.274.43.30353
   Salih E, 2005, MASS SPECTROM REV, V24, P828, DOI 10.1002/mas.20042
   Salih E, 1996, J BIOL CHEM, V271, P16897, DOI 10.1074/jbc.271.28.16897
   Salih E, 1997, J BIOL CHEM, V272, P13966, DOI 10.1074/jbc.272.21.13966
   Salomon AR, 2003, P NATL ACAD SCI USA, V100, P443, DOI 10.1073/pnas.2436191100
   Saltiel AR, 1996, AM J PHYSIOL-ENDOC M, V270, pE375, DOI 10.1152/ajpendo.1996.270.3.E375
   Sanchez-Valdepenas C, 2006, J IMMUNOL, V176, P4666, DOI 10.4049/jimmunol.176.8.4666
   Sasaki N, 2001, CLIN CANCER RES, V7, P4136
   Savitski MM, 2007, J AM SOC MASS SPECTR, V18, P113, DOI 10.1016/j.jasms.2006.09.008
   Sawyers CL, 2008, NATURE, V452, P548, DOI 10.1038/nature06913
   Schlessinger J, 2000, CELL, V103, P211, DOI 10.1016/j.cell.2010.06.011
   Schmezle K, 2006, CURR OPIN BIOTECH, V17, P406, DOI 10.1016/j.copbio.2006.06.004
   Schroeder MJ, 2005, J PROTEOME RES, V4, P1832, DOI 10.1021/pr0502020
   Schroeder MJ, 2004, ANAL CHEM, V76, P3590, DOI 10.1021/ac0497104
   Schulenberg B, 2003, J BIOL CHEM, V278, P27251, DOI 10.1074/jbc.C300189200
   Schwabe RF, 2005, FASEB J, V19, P1758, DOI 10.1096/fj.05-3736fje
   Schwartz D, 2005, NAT BIOTECHNOL, V23, P1391, DOI 10.1038/nbt1146
   Sebban H, 2006, TRENDS CELL BIOL, V16, P569, DOI 10.1016/j.tcb.2006.09.004
   SEFTON BM, 1991, METHOD ENZYMOL, V201, P245
   SEN R, 1986, CELL, V47, P921, DOI 10.1016/0092-8674(86)90807-X
   Senftleben U, 2001, SCIENCE, V293, P1495, DOI 10.1126/science.1062677
   Sharma SV, 2007, NAT REV CANCER, V7, P169, DOI 10.1038/nrc2088
   Sharma V, 2004, BIOORG MED CHEM LETT, V14, P4319, DOI 10.1016/j.bmcl.2004.05.079
   Sharma V, 2007, CURR MED CHEM, V14, P1061, DOI 10.2174/092986707780362844
   Sharma V, 2006, J AM CHEM SOC, V128, P9137, DOI 10.1021/ja060273f
   Shawver LK, 2002, CANCER CELL, V1, P117, DOI 10.1016/S1535-6108(02)00039-9
   Sherr CJ, 1996, SCIENCE, V274, P1672, DOI 10.1126/science.274.5293.1672
   Shevchenko A, 2001, ANAL BIOCHEM, V296, P279, DOI 10.1006/abio.2001.5321
   Shevchenko A, 1997, RAPID COMMUN MASS SP, V11, P1015, DOI 10.1002/(SICI)1097-0231(19970615)11:9<1015::AID-RCM958>3.0.CO;2-H
   Shi SDH, 2001, ANAL CHEM, V73, P19, DOI 10.1021/ac000703z
   Shiio Y, 2002, EMBO J, V21, P5088, DOI 10.1093/emboj/cdf525
   Shiio Y, 2006, NAT PROTOC, V1, P139, DOI 10.1038/nprot.2006.22
   Shin YK, 2006, PROTEOMICS, V6, P1143, DOI 10.1002/pmic.200500433
   Shirley RB, 2005, NEOPLASIA, V7, P1104, DOI 10.1593/neo.05520
   Sizemore N, 2002, J BIOL CHEM, V277, P3863, DOI 10.1074/jbc.M110572200
   Slomiany BL, 2004, BIOCHEM BIOPH RES CO, V318, P247, DOI 10.1016/j.bbrc.2004.04.016
   Smith JC, 2008, BIOCHEM CELL BIOL, V86, P137, DOI 10.1139/O08-007
   Smith JC, 2007, J PROTEOME RES, V6, P3174, DOI 10.1021/pr070122r
   SNYDER GL, 1992, J NEUROSCI, V12, P3071, DOI 10.1523/JNEUROSCI.12-08-03071.1992
   Sopko R, 2008, MOL BIOSYST, V4, P920, DOI 10.1039/b801724g
   Sors A, 2006, BLOOD, V107, P2354, DOI 10.1182/blood-2005-06-2536
   Spellman DS, 2008, MOL CELL PROTEOMICS, V7, P1067, DOI 10.1074/mcp.M700387-MCP200
   Starczynowski DT, 2005, ONCOGENE, V24, P7355, DOI 10.1038/sj.onc.1208902
   Stasyk T, 2005, ELECTROPHORESIS, V26, P2850, DOI 10.1002/elps.200500026
   Steen H, 2006, MOL CELL PROTEOMICS, V5, P172, DOI 10.1074/mcp.M500135-MCP200
   Steen H, 2002, J BIOL CHEM, V277, P1031, DOI 10.1074/jbc.M109992200
   Steinberg TH, 2003, PROTEOMICS, V3, P1128, DOI 10.1002/pmic.200300434
   Stensballe A, 2000, RAPID COMMUN MASS SP, V14, P1793, DOI 10.1002/1097-0231(20001015)14:19<1793::AID-RCM95>3.0.CO;2-Q
   Stephens BJ, 2005, MOL CANCER THER, V4, P1653, DOI 10.1158/1535-7163.MCT-05-0248
   STOVER DR, 2004, CLIN PROTEOM, V1, P69
   Sturm M, 2008, ADV FUNCT MATER, V18, P2381, DOI 10.1002/adfm.200800215
   Sweet SMM, 2008, ANAL CHEM, V80, P6650, DOI 10.1021/ac800963a
   Syka JEP, 2004, P NATL ACAD SCI USA, V101, P9528, DOI 10.1073/pnas.0402700101
   Takai H, 2002, EMBO J, V21, P5195, DOI 10.1093/emboj/cdf506
   Tang XM, 2006, CANCER, V107, P2637, DOI 10.1002/cncr.22315
   Tannu NS, 2006, NAT PROTOC, V1, P1732, DOI 10.1038/nprot.2006.256
   Tao WA, 2005, NAT METHODS, V2, P591, DOI 10.1038/NMETH776
   Thingholm TE, 2008, J PROTEOME RES, V7, P3304, DOI 10.1021/pr800099y
   Thingholm TE, 2008, MOL CELL PROTEOMICS, V7, P661, DOI 10.1074/mcp.M700362-MCP200
   Thingholm TE, 2006, NAT PROTOC, V1, P1929, DOI 10.1038/nprot.2006.185
   Tholey A, 1999, J MASS SPECTROM, V34, P117, DOI 10.1002/(SICI)1096-9888(199902)34:2<117::AID-JMS769>3.0.CO;2-V
   Thompson AJ, 2003, ANAL CHEM, V75, P3232, DOI 10.1021/ac034134h
   TOBEY RA, 1975, NATURE, V254, P245, DOI 10.1038/254245a0
   Tong J, 2008, J PROTEOME RES, V7, P1067, DOI 10.1021/pr7006363
   Trinidad JC, 2008, MOL CELL PROTEOMICS, V7, P684, DOI 10.1074/mcp.M700170-MCP200
   Tseng HC, 2005, CHEM BIOL, V12, P769, DOI 10.1016/j.chembiol.2005.05.012
   van der Veken P, 2005, CHEMBIOCHEM, V6, P2271, DOI 10.1002/cbic.200500209
   Van Waes C, 2007, CLIN CANCER RES, V13, P1076, DOI 10.1158/1078-0432.CCR-06-2221
   Venter JC, 2001, SCIENCE, V291, P1304, DOI 10.1126/science.1058040
   Ventura Juan-Jose, 2006, Clin Transl Oncol, V8, P153, DOI 10.1007/s12094-006-0005-0
   Vermeulen L, 2003, EMBO J, V22, P1313, DOI 10.1093/emboj/cdg139
   Viatour P, 2005, TRENDS BIOCHEM SCI, V30, P43, DOI 10.1016/j.tibs.2004.11.009
   Wang CY, 1996, SCIENCE, V274, P784, DOI 10.1126/science.274.5288.784
   Wang CY, 1998, SCIENCE, V281, P1680, DOI 10.1126/science.281.5383.1680
   Wang D, 2000, J BIOL CHEM, V275, P32592, DOI 10.1074/jbc.M001358200
   Wang L, 2006, ANN ONCOL, V17, P1517, DOI 10.1093/annonc/mdl159
   Wang Y, 2007, INT J COLORECTAL DIS, V22, P1179, DOI 10.1007/s00384-007-0303-1
   Warthaka M, 2006, ACS CHEM BIOL, V1, P697, DOI 10.1021/cb6003564
   WIENER JR, 1994, J NATL CANCER I, V86, P372, DOI 10.1093/jnci/86.5.372
   Wiener MC, 2004, ANAL CHEM, V76, P6085, DOI 10.1021/ac0493875
   Wissing J, 2007, MOL CELL PROTEOMICS, V6, P537, DOI 10.1074/mcp.T600062-MCP200
   Xiao GT, 2001, MOL CELL, V7, P401, DOI 10.1016/S1097-2765(01)00187-3
   Xie HW, 2005, ANAL CHEM, V77, P3198, DOI 10.1021/ac0482256
   Yan JX, 1998, J CHROMATOGR A, V808, P23, DOI 10.1016/S0021-9673(98)00115-0
   Yao Y, 1999, ONCOGENE, V18, P5159, DOI 10.1038/sj.onc.1202908
   Yeh PY, 2004, J BIOL CHEM, V279, P26143, DOI 10.1074/jbc.M402362200
   Yu LR, 2007, J PROTEOME RES, V6, P4150, DOI 10.1021/pr070152u
   Yu SH, 2004, J MOL MED, V82, P621, DOI 10.1007/s00109-004-0559-7
   Yue GE, 2006, ANAL CHIM ACTA, V564, P116, DOI 10.1016/j.aca.2005.11.003
   Yunmbam MK, 2001, INT J ONCOL, V19, P741
   Zabrouskov V, 2008, MOL CELL PROTEOMICS, V7, P1838, DOI 10.1074/mcp.M700524-MCP200
   Zanivan S, 2008, J PROTEOME RES, V7, P5314, DOI 10.1021/pr800599n
   Zhang H, 2004, CURR OPIN CHEM BIOL, V8, P66, DOI 10.1016/j.cbpa.2003.12.001
   Zhang X, 2007, MOL CELL PROTEOMICS, V6, P2032, DOI 10.1074/mcp.M700278-MCP200
   Zhang Y, 2005, MOL CELL PROTEOMICS, V4, P1240, DOI 10.1074/mcp.M500089-MCP200
   Zhang ZF, 2006, ANN THORAC SURG, V82, P243, DOI 10.1016/j.athoracsur.2006.01.049
   Zhang ZY, 2001, CURR OPIN CHEM BIOL, V5, P416, DOI 10.1016/S1367-5931(00)00223-4
   ZHAO JY, 1989, FEBS LETT, V249, P389, DOI 10.1016/0014-5793(89)80665-9
   Zheng HY, 2005, MOL CELL PROTEOMICS, V4, P721, DOI 10.1074/mcp.M400077-MCP200
   Zhong HH, 1997, CELL, V89, P413, DOI 10.1016/S0092-8674(00)80222-6
   Zhong HH, 1998, MOL CELL, V1, P661, DOI 10.1016/S1097-2765(00)80066-0
   Zhou BBS, 2004, NAT REV CANCER, V4, P216, DOI 10.1038/nrc1296
   Zhou HL, 2001, NAT BIOTECHNOL, V19, P375, DOI 10.1038/86777
   Zhou HL, 2002, NAT BIOTECHNOL, V20, P512, DOI 10.1038/nbt0502-512
   Zhu HN, 2002, RAPID COMMUN MASS SP, V16, P2115, DOI 10.1002/rcm.831
   Zhu K, 2005, ANAL CHEM, V77, P2745, DOI 10.1021/ac048494w
   Zhu S, 2007, CANCER RES, V67, P10129, DOI 10.1158/0008-5472.CAN-06-4338
   Zubarev RA, 2002, EUR J MASS SPECTROM, V8, P337, DOI 10.1255/ejms.517
   Zubarev RA, 1998, J AM CHEM SOC, V120, P3265, DOI 10.1021/ja973478k
NR 315
TC 4
Z9 4
U1 2
U2 19
PU BENTHAM SCIENCE PUBL LTD
PI SHARJAH
PA EXECUTIVE STE Y-2, PO BOX 7917, SAIF ZONE, 1200 BR SHARJAH, U ARAB
   EMIRATES
SN 1574-3624
EI 2212-389X
J9 CURR SIGNAL TRANSD T
JI Curr. Signal Transduct. Ther.
PD JAN
PY 2011
VL 6
IS 1
BP 113
EP 140
PG 28
WC Pharmacology & Pharmacy
WE Science Citation Index Expanded (SCI-EXPANDED)
SC Pharmacology & Pharmacy
GA 934UD
UT WOS:000303471300013
DA 2022-04-10
ER

PT J
AU Cali, B
   Agnellini, AHR
   Cioccarelli, C
   Sanchez-Rodriguez, R
   Predonzani, A
   Toffolo, GI
   Viola, A
   Bronte, V
   Arrigoni, G
   Zonta, F
   Albertoni, L
   Mescoli, C
   Marigo, I
   Molon, B
AF Cali, Bianca
   Agnellini, Andrielly H. R.
   Cioccarelli, Chiara
   Sanchez-Rodriguez, Ricardo
   Predonzani, Andrea
   Toffolo, Giulia Ilaria
   Viola, Antonella
   Bronte, Vincenzo
   Arrigoni, Giorgio
   Zonta, Francesco
   Albertoni, Laura
   Mescoli, Claudia
   Marigo, Ilaria
   Molon, Barbara
TI GM-CSF Nitration Is a New Driver of Myeloid Suppressor Cell Activity in
   Tumors
SO FRONTIERS IN IMMUNOLOGY
LA English
DT Article
DE reactive nitrogen species; cytokines; immunosuppression;
   post-translational modification; tumor microenvironment
ID COLONY-STIMULATING FACTOR; IMMUNE SUPPRESSION; CANCER; ANGIOGENESIS;
   IMMUNOTHERAPY; INFILTRATION; VACCINATION; INDUCTION; TOLERANCE; ANTIGENS
AB Reactive oxygen species, including RNS, contribute to the control of multiple immune cell functions within the tumor microenvironment (TME). Tumor-infiltrating myeloid cells (TIMs) represent the archetype of tolerogenic cells that actively contribute to dismantle effective immunity against cancer. TIMs inhibit T cell functions and promote tumor progression by several mechanism including the amplification of the oxidative/nitrosative stress within the TME. In tumors, TIM expansion and differentiation is regulated by the granulocyte-macrophage colony-stimulating factor (GM-CSF), which is produced by cancer and immune cells. Nevertheless, the role of GM-CSF in tumors has not yet been fully elucidated. In this study, we show that GM-CSF activity is significantly affected by RNS-triggered post-translational modification. The nitration of a single tryptophan residue in the sequence of GM-CSF nourishes the expansion of highly immunosuppressive myeloid subsets in tumor-bearing hosts. Importantly, tumors from colorectal cancer patients express higher levels of nitrated tryptophan compared to non-neoplastic tissues. Collectively, our data identify a novel and selective target that can be exploited to remodel the TME and foster protective immunity against cancer.
C1 [Cali, Bianca; Agnellini, Andrielly H. R.; Cioccarelli, Chiara; Sanchez-Rodriguez, Ricardo; Viola, Antonella; Arrigoni, Giorgio; Molon, Barbara] Univ Padua, Dept Biomed Sci, Padua, Italy.
   [Agnellini, Andrielly H. R.] Univ Padua, Oncol & Immunol Sect, Dept Surg Oncol & Gastroenterol, Padua, Italy.
   [Cioccarelli, Chiara; Sanchez-Rodriguez, Ricardo; Viola, Antonella; Molon, Barbara] Fdn Ist Ric Pediat Citta Speranza, Padua, Italy.
   [Predonzani, Andrea; Toffolo, Giulia Ilaria; Marigo, Ilaria] Veneto Inst Oncol IOV IRCCS, Padua, Italy.
   [Bronte, Vincenzo] Verona Univ Hosp, Dept Med, Verona, Italy.
   [Zonta, Francesco] ShanghaiTech Univ, Shanghai Inst Adv Immunochem Studies, Shanghai, Peoples R China.
   [Albertoni, Laura; Mescoli, Claudia] Univ Padua, Surg Pathol & Cytopathol Unit, Dept Med DIMED, Dept Med, Padua, Italy.
   [Cali, Bianca] Oncol Inst Southern Switzerland IOSI, Inst Oncol Res IOR, Bellinzona, Switzerland.
   [Cali, Bianca] Univ Svizzera Italiana, Lugano, Switzerland.
RP Molon, B (corresponding author), Univ Padua, Dept Biomed Sci, Padua, Italy.; Molon, B (corresponding author), Fdn Ist Ric Pediat Citta Speranza, Padua, Italy.; Marigo, I (corresponding author), Veneto Inst Oncol IOV IRCCS, Padua, Italy.
EM ilaria.marigo@iov.veneto.it; barbara.molon@unipd.it
RI ; Viola, Antonella/A-4321-2015
OI ARRIGONI, GIORGIO/0000-0002-4103-2733; Viola,
   Antonella/0000-0002-0125-9271; Cali, Bianca/0000-0002-9090-9992;
   Sanchez-Rodriguez, Ricardo/0000-0002-9111-2176
FU Italian Ministry of HealthMinistry of Health, Italy
   [2009-GR-2009-1558698]; Cariparo Fundation Fellowship
FX Grant from the Italian Ministry of Health, BANDO GIOVANI RICERCATORI,
   No. 2009-GR-2009-1558698; Agnellini R.H. A. was granted by Cariparo
   Fundation Fellowship.
CR Alvarez B, 2003, AMINO ACIDS, V25, P295, DOI 10.1007/s00726-003-0018-8
   Bayne LJ, 2012, CANCER CELL, V21, P822, DOI 10.1016/j.ccr.2012.04.025
   Binsfeld M, 2016, ONCOTARGET, V7, P37931, DOI 10.18632/oncotarget.9270
   Bronte V, 1999, J IMMUNOL, V162, P5728
   Bronte V, 1998, J IMMUNOL, V161, P5313
   Bronte V, 2016, NAT COMMUN, V7, DOI 10.1038/ncomms12150
   Chen GJ, 2014, ONCOIMMUNOLOGY, V3, DOI 10.4161/onci.28186
   Damuzzo V, 2015, CYTOM PART B-CLIN CY, V88, P77, DOI [10.1002/cyto.b.21206, 10.1002/cytob.21206]
   De Sanctis F, 2016, BBA-REV CANCER, V1865, P35, DOI 10.1016/j.bbcan.2015.08.001
   De Sanctis F, 2014, FRONT IMMUNOL, V5, DOI 10.3389/fimmu.2014.00069
   Demirci U, 2009, ASIAN PAC J CANCER P, V10, P1021
   Dolcetti L, 2010, EUR J IMMUNOL, V40, P22, DOI 10.1002/eji.200939903
   Finkelstein SE, 2010, J IMMUNOTHER, V33, P817, DOI 10.1097/CJI.0b013e3181ecccad
   Gabrilovich DI, 2009, NAT REV IMMUNOL, V9, P162, DOI 10.1038/nri2506
   Ganesh K, 2019, NAT REV GASTRO HEPAT, V16, P361, DOI 10.1038/s41575-019-0126-x
   Hercus TR, 2012, GROWTH FACTORS, V30, P63, DOI 10.3109/08977194.2011.649919
   Kasic T, 2011, EUR J IMMUNOL, V41, P1843, DOI 10.1002/eji.201040868
   Kim IK, 2019, CANCER IMMUNOL RES, V7, P498, DOI 10.1158/2326-6066.CIR-18-0518
   Kumar V, 2017, CANCER CELL, V32, P654, DOI 10.1016/j.ccell.2017.10.005
   Kumar V, 2016, TRENDS IMMUNOL, V37, P208, DOI 10.1016/j.it.2016.01.004
   Laheru D, 2008, CLIN CANCER RES, V14, P1455, DOI 10.1158/1078-0432.CCR-07-0371
   Mach N, 2000, CANCER RES, V60, P3239
   MANTOVANI A, 1992, IMMUNOL TODAY, V13, P265, DOI 10.1016/0167-5699(92)90008-U
   Marigo I, 2008, IMMUNOL REV, V222, P162, DOI 10.1111/j.1600-065X.2008.00602.x
   Marigo I, 2010, IMMUNITY, V32, P790, DOI 10.1016/j.immuni.2010.05.010
   Molon B, 2011, J EXP MED, V208, P1949, DOI 10.1084/jem.20101956
   Najjar YG, 2017, CLIN CANCER RES, V23, P2346, DOI 10.1158/1078-0432.CCR-15-1823
   Nebiker CA, 2014, CLIN CANCER RES, V20, P3094, DOI 10.1158/1078-0432.CCR-13-2774
   Parmiani G, 2007, ANN ONCOL, V18, P226, DOI 10.1093/annonc/mdl158
   Perez-Riverol Y, 2019, NUCLEIC ACIDS RES, V47, pD442, DOI 10.1093/nar/gky1106
   Salgia R, 2003, J CLIN ONCOL, V21, P624, DOI 10.1200/JCO.2003.03.091
   Sandri S, 2017, ONCOTARGET, V8, P86987, DOI 10.18632/oncotarget.18115
   Schaaf MB, 2018, CELL DEATH DIS, V9, DOI 10.1038/s41419-017-0061-0
   Senzer N, 2012, MOL THER, V20, P679, DOI 10.1038/mt.2011.269
   Serafini P, 2004, CANCER RES, V64, P6337, DOI 10.1158/0008-5472.CAN-04-0757
   Sharpe AH, 2017, IMMUNOL REV, V276, P5, DOI 10.1111/imr.12531
   Simons JW, 1999, CANCER RES, V59, P5160
   Stromnes IM, 2014, CLIN CANCER RES, V20, P5157, DOI 10.1158/1078-0432.CCR-13-0866
   Talmadge JE, 2013, NAT REV CANCER, V13, P739, DOI 10.1038/nrc3581
   Tertil M, 2010, CURR PHARM DESIGN, V16, P3877, DOI 10.2174/138161210794454969
   Ugel S, 2015, J CLIN INVEST, V125, P3365, DOI 10.1172/JCI80006
   Ugel S, 2012, CELL REP, V2, P628, DOI 10.1016/j.celrep.2012.08.006
   Veglia F, 2018, NAT IMMUNOL, V19, P108, DOI 10.1038/s41590-017-0022-x
   Vonderheide RH, 2013, CURR OPIN IMMUNOL, V25, P200, DOI 10.1016/j.coi.2013.01.006
   Yang GL, 2017, ONCOTARGET, V8, P38378, DOI 10.18632/oncotarget.16386
   Ye XZ, 2010, J GENET GENOMICS, V37, P423, DOI 10.1016/S1673-8527(09)60061-8
   Zhao M, 2013, PLOS ONE, V8, DOI 10.1371/journal.pone.0078620
   Zheng QW, 2017, TUMOR BIOL, V39, DOI 10.1177/1010428317692232
NR 48
TC 0
Z9 0
U1 0
U2 0
PU FRONTIERS MEDIA SA
PI LAUSANNE
PA AVENUE DU TRIBUNAL FEDERAL 34, LAUSANNE, CH-1015, SWITZERLAND
SN 1664-3224
J9 FRONT IMMUNOL
JI Front. Immunol.
PD OCT 5
PY 2021
VL 12
AR 718098
DI 10.3389/fimmu.2021.718098
PG 13
WC Immunology
WE Science Citation Index Expanded (SCI-EXPANDED)
SC Immunology
GA WI6II
UT WOS:000708461300001
PM 34675917
OA gold, Green Published
DA 2022-04-10
ER

PT J
AU Chisanga, D
   Keerthikumar, S
   Pathan, M
   Ariyaratne, D
   Kalra, H
   Boukouris, S
   Mathew, NA
   Al Saffar, H
   Gangoda, L
   Ang, CS
   Sieber, OM
   Mariadason, JM
   Dasgupta, R
   Chilamkurti, N
   Mathivanan, S
AF Chisanga, David
   Keerthikumar, Shivakumar
   Pathan, Mohashin
   Ariyaratne, Dinuka
   Kalra, Hina
   Boukouris, Stephanie
   Mathew, Nidhi Abraham
   Al Saffar, Haidar
   Gangoda, Lahiru
   Ang, Ching-Seng
   Sieber, Oliver M.
   Mariadason, John M.
   Dasgupta, Ramanuj
   Chilamkurti, Naveen
   Mathivanan, Suresh
TI Colorectal cancer atlas: An integrative resource for genomic and
   proteomic annotations from colorectal cancer cell lines and tissues
SO NUCLEIC ACIDS RESEARCH
LA English
DT Article
ID OMICS DATA; COLON; PROTEINS
AB In order to advance our understanding of colorectal cancer (CRC) development and progression, biomedical researchers have generated large amounts of OMICS data from CRC patient samples and representative cell lines. However, these data are deposited in various repositories or in supplementary tables. A database which integrates data from heterogeneous resources and enables analysis of the multidimensional data sets, specifically pertaining to CRC is currently lacking. Here, we have developed Colorectal Cancer Atlas (http://www.colonatlas.org), an integrated web-based resource that catalogues the genomic and proteomic annotations identified in CRC tissues and cell lines. The data catalogued to-date include sequence variations as well as quantitative and non-quantitative protein expression data. The database enables the analysis of these data in the context of signaling pathway, protein-protein interaction, Gene Ontology terms, protein domains and post-translational modification. Currently, Colorectal Cancer Atlas contains data for >13 711 CRC tissues, >165 CRC cell lines, 62 251 protein identifications, >8.3 million MS/MS spectra, >18 410 genes with sequence variations (404 278 entries) and 351 pathway with sequence variants. Overall, Colorectal Cancer Atlas has been designed to serve as a central resource to facilitate research in CRC.
C1 [Chisanga, David; Chilamkurti, Naveen] La Trobe Univ, Dept Comp Sci & Informat Technol, Bundoora, Vic 3086, Australia.
   [Keerthikumar, Shivakumar; Pathan, Mohashin; Ariyaratne, Dinuka; Kalra, Hina; Boukouris, Stephanie; Mathew, Nidhi Abraham; Al Saffar, Haidar; Gangoda, Lahiru; Mathivanan, Suresh] La Trobe Univ, La Trobe Inst Mol Sci, Dept Biochem & Genet, Melbourne, Vic 3086, Australia.
   [Ang, Ching-Seng] Univ Melbourne, Mol Sci & Biotechnol Inst Bio21, Parkville, Vic 3010, Australia.
   [Sieber, Oliver M.] Walter & Eliza Hall Inst Med Res, Parkville, Vic 3052, Australia.
   [Sieber, Oliver M.] Univ Melbourne, Dept Med Biol, Fac Med Dent & Hlth Sci, Parkville, Vic 3052, Australia.
   [Mariadason, John M.] Olivia Newton John Canc Res Inst, Melbourne, Vic 3084, Australia.
   [Mariadason, John M.] Ludwig Inst Canc Res, Melbourne Austin Branch, Melbourne, Vic 3084, Australia.
   [Mariadason, John M.] La Trobe Univ, Sch Canc Med, Melbourne, Vic 3084, Australia.
   [Dasgupta, Ramanuj] ASTAR, Genome Inst Singapore, 60 Biopolis St, Singapore 138672, Singapore.
RP Mathivanan, S (corresponding author), La Trobe Univ, La Trobe Inst Mol Sci, Dept Biochem & Genet, Melbourne, Vic 3086, Australia.
EM S.Mathivanan@latrobe.edu.au
RI KEERTHIKUMAR, SHIVAKUMAR/AAP-6850-2020; Ang, Ching-Seng/O-9811-2016;
   Mathivanan, Suresh/D-2045-2009; Keerthikumar, Shivakumar/B-4673-2011;
   Sieber, Oliver/M-9473-2015; Chilamkurti, Naveen/S-9636-2019; Sieber,
   Oliver/ABA-9211-2021; Chisanga, David/AAB-1751-2019
OI KEERTHIKUMAR, SHIVAKUMAR/0000-0001-9865-9767; Ang,
   Ching-Seng/0000-0001-7861-6719; Mathivanan, Suresh/0000-0002-7290-5795;
   Keerthikumar, Shivakumar/0000-0001-9865-9767; Sieber,
   Oliver/0000-0001-9480-0786; Sieber, Oliver/0000-0001-9480-0786;
   Chisanga, David/0000-0002-0421-3957; Gangoda,
   Lahiru/0000-0003-1931-6809; Dasgupta, Ramanuj/0000-0001-9015-3729;
   Mariadason, John/0000-0001-9123-7684
FU Australian NHMRC fellowshipNational Health and Medical Research Council
   (NHMRC) of Australia [1016599]; Ramaciotti Establishment grant;
   Australian NH MRC fellowshipNational Health and Medical Research Council
   (NHMRC) of Australia [1016599]
FX Australian NH&MRC fellowship [1016599 to S.M.] and Ramaciotti
   Establishment grant. The funders had no role in study design, data
   collection and analysis, decision to publish or preparation of the
   manuscript. Funding for open access charge: Australian NH& MRC
   fellowship [1016599] and Ramaciotti Establishment grant.
CR An O, 2014, DATABASE-OXFORD, DOI 10.1093/database/bau015
   Barretina J, 2012, NATURE, V483, P603, DOI 10.1038/nature11003
   Chambers MC, 2012, NAT BIOTECHNOL, V30, P918, DOI 10.1038/nbt.2377
   Chatr-aryamontri A, 2015, NUCLEIC ACIDS RES, V43, pD470, DOI 10.1093/nar/gku1204
   Craig R, 2004, BIOINFORMATICS, V20, P1466, DOI 10.1093/bioinformatics/bth092
   Fasolini M, 2003, J BIOL CHEM, V278, P21092, DOI 10.1074/jbc.M301781200
   Forbes SA, 2015, NUCLEIC ACIDS RES, V43, pD805, DOI 10.1093/nar/gku1075
   Gundem G, 2010, NAT METHODS, V7, P92, DOI 10.1038/nmeth0210-92
   Jemal A, 2011, CA-CANCER J CLIN, V61, P134, DOI [10.3322/caac.20115, 10.3322/caac.20107]
   Kanehisa M, 2014, NUCLEIC ACIDS RES, V42, pD199, DOI 10.1093/nar/gkt1076
   Keerthikumar S, 2016, J MOL BIOL, V428, P688, DOI 10.1016/j.jmb.2015.09.019
   Keerthikumar S, 2015, ONCOTARGET, V6, P15375, DOI 10.18632/oncotarget.3801
   Lawrence MS, 2014, NATURE, V505, P495, DOI 10.1038/nature12912
   Mariadason JM, 2003, CANCER RES, V63, P8791
   Mathivanan S, 2008, NAT BIOTECHNOL, V26, P164, DOI 10.1038/nbt0208-164
   Mathivanan S, 2012, J PROTEOMICS, V76, P141, DOI 10.1016/j.jprot.2012.06.031
   Milacic Marija, 2012, Cancers (Basel), V4, P1180, DOI 10.3390/cancers4041180
   Muzny DM, 2012, NATURE, V487, P330, DOI 10.1038/nature11252
   Paoletti AC, 2006, P NATL ACAD SCI USA, V103, P18928, DOI 10.1073/pnas.0606379103
   Pathan M, 2015, PROTEOMICS, V15, P2597, DOI 10.1002/pmic.201400515
   Prasad TSK, 2009, NUCLEIC ACIDS RES, V37, pD767, DOI 10.1093/nar/gkn892
   Sadanandam A, 2013, NAT MED, V19, P619, DOI 10.1038/nm.3175
   Shi ZA, 2013, NAT METHODS, V10, P597, DOI 10.1038/nmeth.2517
   Uhlen M, 2015, SCIENCE, V347, DOI 10.1126/science.1260419
   Wang ZH, 2003, CANCER RES, V63, P5234
   Zhang B, 2014, NATURE, V513, P382, DOI 10.1038/nature13438
   Zhao M, 2013, NUCLEIC ACIDS RES, V41, pD970, DOI 10.1093/nar/gks937
   Zhu J, 2015, BIOINFORMATICS, V31, P1436, DOI 10.1093/bioinformatics/btu834
NR 28
TC 31
Z9 31
U1 0
U2 6
PU OXFORD UNIV PRESS
PI OXFORD
PA GREAT CLARENDON ST, OXFORD OX2 6DP, ENGLAND
SN 0305-1048
EI 1362-4962
J9 NUCLEIC ACIDS RES
JI Nucleic Acids Res.
PD JAN 4
PY 2016
VL 44
IS D1
BP D969
EP D974
DI 10.1093/nar/gkv1097
PG 6
WC Biochemistry & Molecular Biology
WE Science Citation Index Expanded (SCI-EXPANDED)
SC Biochemistry & Molecular Biology
GA DF3QY
UT WOS:000371261700137
PM 26496946
OA Green Submitted, Green Published, gold
DA 2022-04-10
ER

PT J
AU Kalejta, RF
   Shenk, T
AF Kalejta, RF
   Shenk, T
TI Manipulation of the cell cycle by human cytomegalovirus
SO FRONTIERS IN BIOSCIENCE-LANDMARK
LA English
DT Review
DE human cytomegalovirus; cell cycle; tumor suppressor; oncogenes; cyclins;
   review
ID IE2 86-KILODALTON PROTEIN; IMMEDIATE-EARLY PROTEINS; RETINOBLASTOMA
   PROTEIN; INFECTED-CELLS; TRANSCRIPTIONAL ACTIVATION; FUNCTIONAL
   INTERACTION; TEGUMENT PROTEIN; gene expression; P107 PROTEIN; S-PHASE
AB The human cytomegalovirus- induced changes to the transcriptome and proteome of infected cells in many ways resemble an abortive mitogenic response. The virus induces quiescent cells to re-enter the cell cycle, but they are prevented from entering the S phase, where the synthesis of the cellular genome would compete with that of the virus for the available precursors for DNA replication. The mechanism of these cell cycle alterations include transcriptional induction and repression, post-translational modification and changes in protein stability. Essentially every class of cell cycle regulators is affected, and some of the key proteins are targeted by multiple different mechanism. While the effects on cell cycle progression of viral infection, and of individual viral genes outside the context of viral infection have been described, it is now important to synthesize these two experimental approaches to gain a more complete understanding of how and why human cytomegalovirus infection affects cell cycle progression.
C1 Princeton Univ, Dept Mol Biol, Princeton, NJ 08544 USA.
RP Shenk, T (corresponding author), Princeton Univ, Dept Mol Biol, Princeton, NJ 08544 USA.
EM tshenk@priceton.edu
FU NCI NIH HHSUnited States Department of Health & Human ServicesNational
   Institutes of Health (NIH) - USANIH National Cancer Institute (NCI)
   [CA82396] Funding Source: Medline; NATIONAL CANCER INSTITUTEUnited
   States Department of Health & Human ServicesNational Institutes of
   Health (NIH) - USANIH National Cancer Institute (NCI) [R01CA082396]
   Funding Source: NIH RePORTER
CR Albrecht T, 1989, Subcell Biochem, V15, P157
   Baldick CJ, 1997, J VIROL, V71, P4400, DOI 10.1128/JVI.71.6.4400-4408.1997
   Baldick CJ, 1996, J VIROL, V70, P6097, DOI 10.1128/JVI.70.9.6097-6105.1996
   BOLDOGH I, 1990, SCIENCE, V247, P561, DOI 10.1126/science.1689075
   BOLDOGH I, 1991, J VIROL, V65, P1568, DOI 10.1128/JVI.65.3.1568-1571.1991
   Bonin LR, 1997, J VIROL, V71, P5861, DOI 10.1128/JVI.71.8.5861-5870.1997
   Boyle KA, 1999, MOL CELL BIOL, V19, P3607
   Bresnahan WA, 2000, SCIENCE, V288, P2373, DOI 10.1126/science.288.5475.2373
   Bresnahan WA, 1998, J BIOL CHEM, V273, P22075, DOI 10.1074/jbc.273.34.22075
   Bresnahan WA, 1997, VIROLOGY, V231, P239, DOI 10.1006/viro.1997.8489
   Bresnahan WA, 1996, VIROLOGY, V224, P150, DOI 10.1006/viro.1996.0516
   Bresnahan WA, 2000, P NATL ACAD SCI USA, V97, P14506, DOI 10.1073/pnas.97.26.14506
   Browne EP, 2001, J VIROL, V75, P12319, DOI 10.1128/JVI.75.24.12319-12330.2001
   Brune W, 2000, TRENDS GENET, V16, P254, DOI 10.1016/S0168-9525(00)02015-1
   Castillo JP, 2000, J VIROL, V74, P8028, DOI 10.1128/JVI.74.17.8028-8037.2000
   Chen ZP, 2001, J VIROL, V75, P3613, DOI 10.1128/JVI.75.8.3613-3625.2001
   CHOI KS, 1995, VIROLOGY, V208, P450, DOI 10.1006/viro.1995.1175
   Classon M, 2001, EXP CELL RES, V264, P135, DOI 10.1006/excr.2000.5135
   Dittmer D, 1997, J VIROL, V71, P1629, DOI 10.1128/JVI.71.2.1629-1634.1997
   Doniger J, 1999, CLIN MICROBIOL REV, V12, P367, DOI 10.1128/CMR.12.3.367
   Dwarakanath RS, 2001, VIROLOGY, V284, P297, DOI 10.1006/viro.2001.0924
   Dyson N, 1998, GENE DEV, V12, P2245, DOI 10.1101/gad.12.15.2245
   Fortunato EA, 1997, J VIROL, V71, P8176, DOI 10.1128/JVI.71.11.8176-8185.1997
   Fortunato EA, 2000, TRENDS MICROBIOL, V8, P111, DOI 10.1016/S0966-842X(00)01699-1
   Fortunato EA, 1998, J VIROL, V72, P2033, DOI 10.1128/JVI.72.3.2033-2039.1998
   Goldmacher VS, 1999, P NATL ACAD SCI USA, V96, P12536, DOI 10.1073/pnas.96.22.12536
   HAGEMEIER C, 1994, EMBO J, V13, P2897, DOI 10.1002/j.1460-2075.1994.tb06584.x
   Harel NY, 1998, J VIROL, V72, P5481, DOI 10.1128/JVI.72.7.5481-5492.1998
   Hayashi ML, 2000, P NATL ACAD SCI USA, V97, P2692, DOI 10.1073/pnas.050587597
   HEIDER JA, IN PRESS CHARACTERIZ
   IKEDA MA, 1993, MOL CELL BIOL, V13, P7029, DOI 10.1128/MCB.13.11.7029
   Iyer VR, 1999, SCIENCE, V283, P83, DOI 10.1126/science.283.5398.83
   JAULT FM, 1995, J VIROL, V69, P6697, DOI 10.1128/JVI.69.11.6697-6704.1995
   Johnson DG, 1999, ANNU REV PHARMACOL, V39, P295, DOI 10.1146/annurev.pharmtox.39.1.295
   Johnson RA, 1999, J GEN VIROL, V80, P1293, DOI 10.1099/0022-1317-80-5-1293
   Kaelin WG, 1999, ONCOGENE, V18, P7701, DOI 10.1038/sj.onc.1202955
   Kelly TJ, 2000, ANNU REV BIOCHEM, V69, P829, DOI 10.1146/annurev.biochem.69.1.829
   KLUCHER KM, 1990, J VIROL, V64, P4189, DOI 10.1128/JVI.64.9.4189-4198.1990
   Kotenko SV, 2000, P NATL ACAD SCI USA, V97, P1695, DOI 10.1073/pnas.97.4.1695
   Kovacs A, 1996, AM J PATHOL, V149, P1531
   Larminie CGC, 1997, EMBO J, V16, P2061, DOI 10.1093/emboj/16.8.2061
   LIU B, 1992, J VIROL, V66, P4434, DOI 10.1128/JVI.66.7.4434-4444.1992
   Lu MS, 1999, J VIROL, V73, P676, DOI 10.1128/JVI.73.1.676-683.1999
   Lu MS, 1996, J VIROL, V70, P8850, DOI 10.1128/JVI.70.12.8850-8857.1996
   Lukac DM, 1999, J VIROL, V73, P2825, DOI 10.1128/JVI.73.4.2825-2831.1999
   Marchini A, 2001, J VIROL, V75, P1870, DOI 10.1128/JVI.75.4.1870-1878.2001
   MARGOLIS MJ, 1995, J VIROL, V69, P7759, DOI 10.1128/JVI.69.12.7759-7767.1995
   Mcelroy AK, 2000, J VIROL, V74, P4192, DOI 10.1128/JVI.74.9.4192-4206.2000
   Mocarski E.S., 2001, FIELDS VIROLOGY, P2629
   Mocarski ES, 1996, P NATL ACAD SCI USA, V93, P11321, DOI 10.1073/pnas.93.21.11321
   Morgan DO, 1999, NAT CELL BIOL, V1, pE47, DOI 10.1038/10039
   Morgan DO, 1997, ANNU REV CELL DEV BI, V13, P261, DOI 10.1146/annurev.cellbio.13.1.261
   MUGANDA P, 1994, J VIROL, V68, P8028, DOI 10.1128/JVI.68.12.8028-8034.1994
   Muralidhar S, 1996, J VIROL, V70, P8691, DOI 10.1128/JVI.70.12.8691-8700.1996
   Murphy EA, 2000, J VIROL, V74, P7108, DOI 10.1128/JVI.74.15.7108-7118.2000
   Ohtani K, 1995, P NATL ACAD SCI USA, V92, P12146, DOI 10.1073/pnas.92.26.12146
   Pajovic S, 1997, MOL CELL BIOL, V17, P6459, DOI 10.1128/MCB.17.11.6459
   Poma EE, 1996, J VIROL, V70, P7867, DOI 10.1128/JVI.70.11.7867-7877.1996
   Roberts JM, 1999, CELL, V98, P129, DOI 10.1016/S0092-8674(00)81007-7
   Rodems SM, 1998, J VIROL, V72, P2697, DOI 10.1128/JVI.72.4.2697-2707.1998
   Rodems SM, 1998, J VIROL, V72, P9173, DOI 10.1128/JVI.72.11.9173-9180.1998
   Ryan KM, 2001, CURR OPIN CELL BIOL, V13, P332, DOI 10.1016/S0955-0674(00)00216-7
   Salvant BS, 1998, J VIROL, V72, P3729, DOI 10.1128/JVI.72.5.3729-3741.1998
   SCHWARTZ R, 1994, J VIROL, V68, P5613, DOI 10.1128/JVI.68.9.5613-5622.1994
   Shen YQ, 1997, P NATL ACAD SCI USA, V94, P3341, DOI 10.1073/pnas.94.7.3341
   SHERR CJ, 1995, TRENDS BIOCHEM SCI, V20, P187, DOI 10.1016/S0968-0004(00)89005-2
   Sherr CJ, 1999, GENE DEV, V13, P1501, DOI 10.1101/gad.13.12.1501
   Simmen KA, 2001, P NATL ACAD SCI USA, V98, P7140, DOI 10.1073/pnas.121177598
   Sinclair J, 2000, J GEN VIROL, V81, P1553, DOI 10.1099/0022-1317-81-6-1553
   SOMMER MH, 1994, J VIROL, V68, P6223, DOI 10.1128/JVI.68.10.6223-6231.1994
   SONG YJ, UNPUB EFFECT HUMAN C
   SPEIR E, 1994, SCIENCE, V265, P391, DOI 10.1126/science.8023160
   STINSKI MF, IN PRESS REGULATION
   Tanaka K, 1999, CIRCULATION, V99, P1656, DOI 10.1161/01.CIR.99.13.1656
   Tsai HL, 1996, J BIOL CHEM, V271, P3534
   WEINBERG RA, 1995, CELL, V81, P323, DOI 10.1016/0092-8674(95)90385-2
   Wiebusch L, 1999, J VIROL, V73, P9274, DOI 10.1128/JVI.73.11.9274-9283.1999
   Wiebusch L, 2001, EMBO J, V20, P1086, DOI 10.1093/emboj/20.5.1086
   Wing BA, 1998, J VIROL, V72, P1814, DOI 10.1128/JVI.72.3.1814-1825.1998
   Winkles JA, 1998, PROG NUCLEIC ACID RE, V58, P41
   ZHU H, 1995, J VIROL, V69, P7960, DOI 10.1128/JVI.69.12.7960-7970.1995
   Zhu H, 1998, P NATL ACAD SCI USA, V95, P14470, DOI 10.1073/pnas.95.24.14470
NR 82
TC 64
Z9 65
U1 1
U2 8
PU FRONTIERS IN BIOSCIENCE INC
PI IRVINE
PA 16471 SCIENTIFIC WAY, IRVINE, CA 92618 USA
SN 1093-9946
EI 1093-4715
J9 FRONT BIOSCI-LANDMRK
JI Front. Biosci.
PD JAN
PY 2002
VL 7
BP D295
EP D306
DI 10.2741/kalejta
PG 12
WC Biochemistry & Molecular Biology; Cell Biology
WE Science Citation Index Expanded (SCI-EXPANDED)
SC Biochemistry & Molecular Biology; Cell Biology
GA 509ZK
UT WOS:000173184100024
PM 11779699
DA 2022-04-10
ER

PT J
AU Manickavinayaham, S
   Velez-Cruz, R
   Biswas, AK
   Chen, J
   Guo, RF
   Johnson, DG
AF Manickavinayaham, Swarnalatha
   Velez-Cruz, Renier
   Biswas, Anup K.
   Chen, Jie
   Guo, Ruifeng
   Johnson, David G.
TI The E2F1 transcription factor and RB tumor suppressor moonlight as DNA
   repair factors
SO CELL CYCLE
LA English
DT Review
DE ATM; ATR; TopBP1; GCN5; p300; CBP; BRG1
ID DOUBLE-STRAND BREAK; NUCLEOTIDE EXCISION-REPAIR; HISTONE ACETYLATION;
   HOMOLOGOUS RECOMBINATION; DAMAGE RESPONSE; BRCT DOMAIN; CHROMATIN;
   COMPLEX; PROTEIN; PHOSPHORYLATION
AB The E2F1 transcription factor and RB tumor suppressor are best known for their roles in regulating the expression of genes important for cell cycle progression but, they also have transcription-independent functions that facilitate DNA repair at sites of damage. Depending on the type of DNA damage, E2F1 can recruit either the GCN5 or p300/CBP histone acetyltransferases to deposit different histone acetylation marks in flanking chromatin. At DNA double-strand breaks, E2F1 also recruits RB and the BRG1 ATPase to remodel chromatin and promote loading of the MRE11-RAD50-NBS1 complex. Knock-in mouse models demonstrate important roles for E2F1 post-translational modification in regulating DNA repair and physiological responses to DNA damage. This review highlights how E2F1 moonlights in DNA repair, thus revealing E2F1 as a versatile protein that recruits many of the same chromatin-modifying enzymes to sites of DNA damage to promote repair that it recruits to gene promoters to regulate transcription.
C1 [Manickavinayaham, Swarnalatha; Chen, Jie; Johnson, David G.] Univ Texas MD Anderson Canc Ctr, Dept Epigenet & Mol Carcinogenesis, Smithville, TX 78957 USA.
   [Velez-Cruz, Renier] Midwestern Univ, Dept Biochem & Mol Genet, Coll Grad Studies, Downers Grove, IL USA.
   [Biswas, Anup K.] Columbia Univ, Herbert Irving Comprehens Canc Ctr, New York, NY USA.
   [Guo, Ruifeng] Mayo Clin, Dept Lab Med & Pathol, Rochester, MN USA.
RP Johnson, DG (corresponding author), Univ Texas MD Anderson Canc Ctr, Dept Epigenet & Mol Carcinogenesis, Smithville, TX 78957 USA.
EM djohnson@mdanderson.org
OI Velez-Cruz, Renier/0000-0003-1857-4312
FU Division of Cancer Epidemiology and Genetics, National Cancer
   InstituteUnited States Department of Health & Human ServicesNational
   Institutes of Health (NIH) - USANIH National Cancer Institute (NCI)NIH
   National Cancer Institute- Division of Cancer Epidemiology & Genetics
   [CA214723]
FX This work was supported by the Division of Cancer Epidemiology and
   Genetics, National Cancer Institute [CA214723].
CR Bakkenist CJ, 2015, DNA REPAIR, V36, P8, DOI 10.1016/j.dnarep.2015.09.002
   Beishline K, 2012, MOL CELL BIOL, V32, P3790, DOI 10.1128/MCB.00049-12
   Bennett G, 2015, DNA REPAIR, V30, P38, DOI 10.1016/j.dnarep.2015.03.006
   Bhoumik A, 2005, MOL CELL, V18, P577, DOI 10.1016/j.molcel.2005.04.015
   Bidon B, 2018, NAT COMMUN, V9, DOI 10.1038/s41467-018-05010-0
   Bigot N, 2019, ELIFE, V8, DOI 10.7554/eLife.44353
   Biswas AK, 2014, CANCER RES, V74, P3369, DOI 10.1158/0008-5472.CAN-13-3216
   Blackford AN, 2017, MOL CELL, V66, P801, DOI 10.1016/j.molcel.2017.05.015
   Bochar DA, 2000, CELL, V102, P257, DOI 10.1016/S0092-8674(00)00030-1
   BODELL WJ, 1981, NUCLEIC ACIDS RES, V9, P203, DOI 10.1093/nar/9.1.203
   Bommi PV, 2020, ONCOGENE, V39, P1784, DOI 10.1038/s41388-019-1105-y
   Bosco EE, 2005, NUCLEIC ACIDS RES, V33, P1581, DOI 10.1093/nar/gki283
   Campanero MR, 1997, P NATL ACAD SCI USA, V94, P2221, DOI 10.1073/pnas.94.6.2221
   Carnevale J, 2012, MOL CELL BIOL, V32, P900, DOI 10.1128/MCB.06286-11
   Chen H, 2013, CELL RES, V23, P317, DOI 10.1038/cr.2012.148
   Chen J, 2011, MOL CELL PROTEOMICS, V10, pM111
   Chen L, 2013, J BIOL CHEM, V288, P14510, DOI 10.1074/jbc.M113.458737
   Chiu LY, 2017, PHILOS T R SOC B, V372, DOI 10.1098/rstb.2016.0286
   Choi EH, 2019, EXP MOL MED, V51, DOI 10.1038/s12276-019-0307-2
   Clouaire T, 2019, TRENDS GENET, V35, P330, DOI 10.1016/j.tig.2019.02.003
   Cook R, 2015, CELL REP, V10, P2006, DOI 10.1016/j.celrep.2015.02.059
   De Siervi A, 2010, CANCER RES, V70, P532, DOI 10.1158/0008-5472.CAN-09-1477
   Fitch ME, 2003, DNA REPAIR, V2, P819, DOI 10.1016/S1568-7864(03)00066-1
   FLEMINGTON EK, 1993, P NATL ACAD SCI USA, V90, P6914, DOI 10.1073/pnas.90.15.6914
   Flowers S, 2010, CANCER RES, V70, DOI 10.1158/1538-7445.AM10-1094
   Flowers SJ, 2013, CANCER RES, V73, DOI 10.1158/1538-7445.AM2013-LB-115
   Fong YW, 2011, CELL, V147, P120, DOI 10.1016/j.cell.2011.08.038
   Fry CJ, 1999, J BIOL CHEM, V274, P15883, DOI 10.1074/jbc.274.22.15883
   Fu X, 2018, CELL DEATH DIFFER, V25, P1625, DOI 10.1038/s41418-018-0068-9
   Guo RF, 2011, NUCLEIC ACIDS RES, V39, P1390, DOI 10.1093/nar/gkq983
   Guo RF, 2010, J BIOL CHEM, V285, P19308, DOI 10.1074/jbc.M110.121939
   Gursoy-Yuzugullu O, 2016, J MOL BIOL, V428, P1846, DOI 10.1016/j.jmb.2015.11.021
   Hallstrom TC, 2006, GENE DEV, V20, P613, DOI 10.1101/gad.1345006
   Hanahan D, 2011, CELL, V144, P646, DOI 10.1016/j.cell.2011.02.013
   Hayes S, 1998, MOL CELL BIOL, V18, P240, DOI 10.1128/MCB.18.1.240
   HELIN K, 1993, MOL CELL BIOL, V13, P6501, DOI 10.1128/MCB.13.10.6501
   Hofmann F, 1996, GENE DEV, V10, P2949, DOI 10.1101/gad.10.23.2949
   Huang S, 2017, CANCER RES, V77, P6562, DOI 10.1158/0008-5472.CAN-17-1570
   Ianari A, 2009, CANCER CELL, V15, P184, DOI 10.1016/j.ccr.2009.01.026
   Inoue Y, 2007, EMBO J, V26, P2083, DOI 10.1038/sj.emboj.7601652
   Iwahori S, 2008, CELL SIGNAL, V20, P1795, DOI 10.1016/j.cellsig.2008.06.007
   Izhar L, 2015, CELL REP, V11, P1486, DOI 10.1016/j.celrep.2015.04.053
   Kent LN, 2019, NAT REV CANCER, V19, P326, DOI 10.1038/s41568-019-0143-7
   Kim JJ, 2019, CRIT REV BIOCHEM MOL, V54, P208, DOI 10.1080/10409238.2019.1620676
   Korah J, 2012, CELL DEATH DIS, V3, DOI 10.1038/cddis.2012.146
   Lang SE, 2001, J BIOL CHEM, V276, P32627, DOI 10.1074/jbc.M102067200
   Le May N, 2010, MOL CELL, V38, P54, DOI 10.1016/j.molcel.2010.03.004
   Lee HS, 2010, EMBO J, V29, P1434, DOI 10.1038/emboj.2010.27
   Lee Y-C, 2011, FASEB J, V25, plb354
   Lin PS, 2009, DNA REPAIR, V8, P795, DOI 10.1016/j.dnarep.2009.03.003
   Lin WC, 2001, GENE DEV, V15, P1833
   Liu K, 2004, GENE DEV, V18, P673, DOI 10.1101/gad.1180204
   Liu K, 2003, MOL CELL BIOL, V23, P3287, DOI 10.1128/MCB.23.9.3287-3304.2003
   Liu K, 2006, EMBO J, V25, P4795, DOI 10.1038/sj.emboj.7601355
   Loizou JI, 2006, CELL CYCLE, V5, P696, DOI 10.4161/cc.5.7.2616
   Malewicz M, 2011, GENE DEV, V25, P2031, DOI 10.1101/gad.16872411
   Manickavinayaham S, 2019, NAT COMMUN, V10, DOI 10.1038/s41467-019-12861-8
   Manke IA, 2003, SCIENCE, V302, P636, DOI 10.1126/science.1088877
   Marshall AE, 2019, MOL CELL BIOL, V39, DOI 10.1128/MCB.00105-19
   Martinez-Balbas MA, 2000, EMBO J, V19, P662, DOI 10.1093/emboj/19.4.662
   Marzio G, 2000, J BIOL CHEM, V275, P10887, DOI 10.1074/jbc.275.15.10887
   Maser RS, 2001, MOL CELL BIOL, V21, P6006, DOI 10.1128/MCB.21.17.6006-6016.2001
   Mullan PB, 2006, ONCOGENE, V25, P5854, DOI 10.1038/sj.onc.1209872
   Munnur D, 2019, CELL REP, V26, P2028, DOI 10.1016/j.celrep.2019.01.083
   Murr R, 2006, NAT CELL BIOL, V8, P91, DOI 10.1038/ncb1343
   Narasimha AM, 2014, ELIFE, V3, DOI 10.7554/eLife.02872
   Niida H, 2017, NAT COMMUN, V8, DOI 10.1038/ncomms16102
   Ogiwara H, 2012, PLOS ONE, V7, DOI 10.1371/journal.pone.0052810
   Pao GM, 2000, P NATL ACAD SCI USA, V97, P1020, DOI 10.1073/pnas.97.3.1020
   Pediconi N, 2003, NAT CELL BIOL, V5, P552, DOI 10.1038/ncb998
   Pediconi N, 2009, MOL CELL BIOL, V29, P1989, DOI 10.1128/MCB.00552-08
   Picaud S, 2015, CANCER RES, V75, P5106, DOI 10.1158/0008-5472.CAN-15-0236
   Pietrzak J, 2019, BBA-GENE REGUL MECH, V1862, P198, DOI 10.1016/j.bbagrm.2018.10.019
   Pillai S, 2010, CANCER RES, V70, P4931, DOI 10.1158/0008-5472.CAN-10-0501
   Polo SE, 2015, DNA REPAIR, V36, P114, DOI 10.1016/j.dnarep.2015.09.014
   Price BD, 2013, CELL, V152, P1344, DOI 10.1016/j.cell.2013.02.011
   Prost S, 2007, ONCOGENE, V26, P3572, DOI 10.1038/sj.onc.1210151
   Rubbi CP, 2003, EMBO J, V22, P975, DOI 10.1093/emboj/cdg082
   Semer M, 2019, NAT CHEM BIOL, V15, P992, DOI 10.1038/s41589-019-0354-y
   Shiyanov P, 1999, MOL CELL BIOL, V19, P4935
   Singh R, 2016, CELL DEATH DIS, V7, DOI 10.1038/cddis.2016.168
   SMERDON MJ, 1978, P NATL ACAD SCI USA, V75, P4238, DOI 10.1073/pnas.75.9.4238
   Sobczak M, 2019, CANCERS, V11, DOI 10.3390/cancers11101539
   Tamburini BA, 2005, MOL CELL BIOL, V25, P4903, DOI 10.1128/MCB.25.12.4903-4913.2005
   Taubert S, 2004, MOL CELL BIOL, V24, P4546, DOI 10.1128/MCB.24.10.4546-4556.2004
   Trouche D, 1996, NUCLEIC ACIDS RES, V24, P4139, DOI 10.1093/nar/24.21.4139
   Van Den Broeck A, 2012, CARCINOGENESIS, V33, P320, DOI 10.1093/carcin/bgr292
   Velez-Cruz R, 2016, GENE DEV, V30, P2500, DOI 10.1101/gad.288282.116
   Velez-Cruz R, 2012, INT J MOL SCI, V13, P13554, DOI 10.3390/ijms131013554
   Wang B, 2004, J BIOL CHEM, V279, P54140, DOI 10.1074/jbc.M410493200
   Wang S, 1999, MOL CELL BIOL, V19, P7447
   Wardlaw CP, 2014, DNA REPAIR, V22, P165, DOI 10.1016/j.dnarep.2014.06.004
   Xiao H, 2005, ONCOGENE, V24, P8105, DOI 10.1038/sj.onc.1208958
   Xu Y, 2010, J CELL BIOL, V191, P31, DOI 10.1083/jcb.201001160
   Yarden RI, 1999, P NATL ACAD SCI USA, V96, P4983, DOI 10.1073/pnas.96.9.4983
   Yu XC, 2003, SCIENCE, V302, P639, DOI 10.1126/science.1088753
   Zaware N, 2019, NAT STRUCT MOL BIOL, V26, P870, DOI 10.1038/s41594-019-0309-8
   Zhao R, 2015, NUCLEIC ACIDS RES, V43, P7838, DOI 10.1093/nar/gkv667
   Zhao R, 2014, MOL CANCER RES, V12, P370, DOI 10.1158/1541-7786.MCR-13-0281
NR 99
TC 1
Z9 2
U1 1
U2 1
PU TAYLOR & FRANCIS INC
PI PHILADELPHIA
PA 530 WALNUT STREET, STE 850, PHILADELPHIA, PA 19106 USA
SN 1538-4101
EI 1551-4005
J9 CELL CYCLE
JI Cell Cycle
PD SEP 16
PY 2020
VL 19
IS 18
BP 2260
EP 2269
DI 10.1080/15384101.2020.1801190
EA AUG 2020
PG 10
WC Cell Biology
WE Science Citation Index Expanded (SCI-EXPANDED)
SC Cell Biology
GA NS0JL
UT WOS:000558967500001
PM 32787501
OA Green Published, hybrid
DA 2022-04-10
ER

PT J
AU Wang, XL
   Herr, RA
   Hansen, T
AF Wang, Xiaoli
   Herr, Roger A.
   Hansen, Ted
TI Viral and cellular MARCH ubiquitinationligases and cancer
SO SEMINARS IN CANCER BIOLOGY
LA English
DT Review
DE Degradation pathway; Ubiquitination; Intracellular trafficking; Immune
   evasion; gamma Herpesvirus-68; Kaposi's sarcoma-associated herpes virus
ID MHC CLASS-I; SARCOMA-ASSOCIATED HERPESVIRUS; MAJOR HISTOCOMPATIBILITY
   COMPLEX; PEPTIDE-LOADING COMPLEX; LEUKEMIA-INHIBITORY-FACTOR;
   RETICULUM-ASSOCIATED DEGRADATION; ER-ASSOCIATED DEGRADATION; TO-CYTOSOL
   DISLOCATION; ENDOPLASMIC-RETICULUM; DOWN-REGULATION
AB Covalent conjugation of proteins with ubiquitinationis one the most important post-translational modification because it controls intracellular protein trafficking typically resulting in protein degradation. Frequently ubiquitinated proteins are targeted to the proteasome for degradation in the cytosol. However, ubiquitinated membrane bound proteins can also be targeted for endocytosis and degradation in the lysosome. Ubiquitin-de pendent degradation pathway have clear cancer relevance due to their integral involvement in protein quality control, regulation of immune responses, signal transduction, and cell cycle regulation. In spite of its fundamental importance, little is known regarding how proteins are specifically identified for ubiquitin-dependent degradation. In this article we review a newly discovered family of viral and cellular ubiquitinationligases called MARCH proteins. Recent studies of MARCH proteins define new paradigms showing how ubiquitinationE3 ligases determine the intracellular location and fate of proteins. (C) 2008 Elsevier Ltd. All rights reserved.
C1 [Wang, Xiaoli; Herr, Roger A.; Hansen, Ted] Washington Univ, Sch Med, Dept Pathol & Immunol, St Louis, MO 63110 USA.
RP Hansen, T (corresponding author), Washington Univ, Sch Med, Dept Pathol & Immunol, St Louis, MO 63110 USA.
EM hansen@wustl.edu
FU National Institutes of HealthUnited States Department of Health & Human
   ServicesNational Institutes of Health (NIH) - USA [AI19687, AI07163];
   NATIONAL INSTITUTE OF ALLERGY AND INFECTIOUS DISEASESUnited States
   Department of Health & Human ServicesNational Institutes of Health (NIH)
   - USANIH National Institute of Allergy & Infectious Diseases (NIAID)
   [R01AI019687, T32AI007163] Funding Source: NIH RePORTER
FX This work was supported by grants AI19687 and A107163 for the National
   Institutes of Health.
CR Baker RK, 1997, DEV BIOL, V185, P201, DOI 10.1006/dbio.1997.8541
   Bartee E, 2004, J VIROL, V78, P1109, DOI 10.1128/JVI.78.3.1109-1120.2004
   Bays NW, 2001, NAT CELL BIOL, V3, P24, DOI 10.1038/35050524
   Binette J, 2007, RETROVIROLOGY, V4, DOI 10.1186/1742-4690-4-75
   Bock JB, 1996, J BIOL CHEM, V271, P17961, DOI 10.1074/jbc.271.30.17961
   Boll W, 1996, EMBO J, V15, P5789, DOI 10.1002/j.1460-2075.1996.tb00965.x
   Boname JM, 2004, IMMUNITY, V20, P305, DOI 10.1016/S1074-7613(04)00047-0
   Boname JM, 2001, IMMUNITY, V15, P627, DOI 10.1016/S1074-7613(01)00213-8
   Bouvier M, 2003, MOL IMMUNOL, V39, P697, DOI 10.1016/S0161-5890(02)00261-4
   Brauweiler A, 2007, ONCOGENE, V26, P2263, DOI 10.1038/sj.onc.1210017
   Burger AM, 2004, EUR J CANCER, V40, P2217, DOI 10.1016/j.ejca.2004.07.006
   Cadwell K, 2005, SCIENCE, V309, P127, DOI 10.1126/science.1110340
   Cadwell K, 2008, J VIROL, V82, P4184, DOI 10.1128/JVI.02264-07
   Cao ZF, 2008, CELL SIGNAL, V20, P73, DOI 10.1016/j.cellsig.2007.08.019
   Carvalho P, 2006, CELL, V126, P361, DOI 10.1016/j.cell.2006.05.043
   Christensen DE, 2007, NAT STRUCT MOL BIOL, V14, P941, DOI 10.1038/nsmb1295
   COHEN AJ, 1979, NEW ENGL J MED, V301, P592, DOI 10.1056/NEJM197909133011107
   Coscoy L, 2000, P NATL ACAD SCI USA, V97, P8051, DOI 10.1073/pnas.140129797
   Davanger S, 1997, MOL BIOL CELL, V8, P1261, DOI 10.1091/mbc.8.7.1261
   De Gassart A, 2008, P NATL ACAD SCI USA, V105, P3491, DOI 10.1073/pnas.0708874105
   Deak PM, 2001, J BIOL CHEM, V276, P10663, DOI 10.1074/jbc.M008608200
   Dodd RB, 2004, J BIOL CHEM, V279, P53840, DOI 10.1074/jbc.M409662200
   Duncan LM, 2006, EMBO J, V25, P1635, DOI 10.1038/sj.emboj.7601056
   Fang S, 2004, CELL MOL LIFE SCI, V61, P1546, DOI 10.1007/s00018-004-4129-5
   Fang S, 2003, SEMIN CANCER BIOL, V13, P5, DOI 10.1016/S1044-579X(02)00095-0
   FELSENSTEIN J, 1985, EVOLUTION, V39, P783, DOI 10.1111/j.1558-5646.1985.tb00420.x
   Fiebiger E, 2002, EMBO J, V21, P1041, DOI 10.1093/emboj/21.5.1041
   Freemont PS, 2000, CURR BIOL, V10, pR84, DOI 10.1016/S0960-9822(00)00287-6
   Fruh K, 2002, VIRUS RES, V88, P55, DOI 10.1016/S0168-1702(02)00120-X
   FUHRER C, 1994, J BIOL CHEM, V269, P3277
   Fukuda H, 2006, J BIOCHEM, V139, P137, DOI 10.1093/jb/mvj012
   Gemmill RM, 1998, P NATL ACAD SCI USA, V95, P9572, DOI 10.1073/pnas.95.16.9572
   Goto E, 2003, J BIOL CHEM, V278, P14657, DOI 10.1074/jbc.M211285200
   Hassink G, 2005, BIOCHEM J, V388, P647, DOI 10.1042/BJ20041241
   Hassink GC, 2006, J BIOL CHEM, V281, P30063, DOI 10.1074/jbc.M602248200
   Hewitt EW, 2002, EMBO J, V21, P2418, DOI 10.1093/emboj/21.10.2418
   Hochstrasser M, 2006, CELL, V124, P27, DOI 10.1016/j.cell.2005.12.025
   Hoer S, 2007, FEBS LETT, V581, P45, DOI 10.1016/j.febslet.2006.11.075
   Holzerlandt R, 2002, GENOME RES, V12, P1739, DOI 10.1101/gr.334302
   Ishido S, 2000, IMMUNITY, V13, P365, DOI 10.1016/S1074-7613(00)00036-4
   Ishido S, 2000, J VIROL, V74, P5300, DOI 10.1128/JVI.74.11.5300-5309.2000
   Jenner RG, 2002, BBA-REV CANCER, V1602, P1, DOI 10.1016/S0304-419X(01)00040-3
   Jin JP, 2007, NATURE, V447, P1135, DOI 10.1038/nature05902
   Karbowski M, 2007, J CELL BIOL, V178, P71, DOI 10.1083/jcb.200611064
   Kikkert M, 2004, J BIOL CHEM, V279, P3525, DOI 10.1074/jbc.M307453200
   Kikkert M, 2001, BIOCHEM J, V358, P369, DOI 10.1042/0264-6021:3580369
   Kostova Z, 2007, SEMIN CELL DEV BIOL, V18, P770, DOI 10.1016/j.semcdb.2007.09.002
   Kreft SG, 2006, J BIOL CHEM, V281, P4646, DOI 10.1074/jbc.M512215200
   Lehner PJ, 2005, IMMUNOL REV, V207, P112, DOI 10.1111/j.0105-2896.2005.00314.x
   Lerner M, 2007, MOL BIOL CELL, V18, P1670, DOI 10.1091/mbc.E06-03-0248
   LI FP, 1993, ANN INTERN MED, V118, P106, DOI 10.7326/0003-4819-118-2-199301150-00005
   Li QL, 2007, J VIROL, V81, P2117, DOI 10.1128/JVI.01961-06
   Lilley BN, 2005, IMMUNOL REV, V207, P126, DOI 10.1111/j.0105-2896.2005.00318.x
   Lilley BN, 2004, NATURE, V429, P834, DOI 10.1038/nature02592
   Lorenzo ME, 2002, J VIROL, V76, P5522, DOI 10.1128/JVI.76.11.5522-5531.2002
   Lorick KL, 1999, P NATL ACAD SCI USA, V96, P11364, DOI 10.1073/pnas.96.20.11364
   Lu H, 2005, NAT CELL BIOL, V7, P1232, DOI 10.1038/ncb1324
   Lybarger L, 2005, CURR OPIN IMMUNOL, V17, P71, DOI 10.1016/j.coi.2004.11.009
   Lybarger L, 2003, IMMUNITY, V18, P121, DOI 10.1016/S1074-7613(02)00509-5
   Mani A, 2005, J CLIN ONCOL, V23, P4776, DOI 10.1200/JCO.2005.05.081
   Mansouri M, 2006, BLOOD, V108, P1932, DOI 10.1182/blood-2005-11-4404
   Matsuki Y, 2007, EMBO J, V26, P846, DOI 10.1038/sj.emboj.7601556
   Means RE, 2002, EMBO J, V21, P1638, DOI 10.1093/emboj/21.7.1638
   Means RE, 2007, J VIROL, V81, P6573, DOI 10.1128/JVI.02751-06
   Metcalfe SM, 2005, PHILOS T R SOC B, V360, P1687, DOI 10.1098/rstb.2005.1697
   Metcalfe SM, 2005, FEBS LETT, V579, P609, DOI 10.1016/j.febslet.2004.12.027
   Morokuma Y, 2007, J BIOL CHEM, V282, P24806, DOI 10.1074/jbc.M700414200
   Muthukumarana P, 2007, TRANSPLANTATION, V84, pS6, DOI 10.1097/01.tp.0000269116.06510.db
   Muthukumarana PADS, 2006, INT IMMUNOPHARMACOL, V6, P1993, DOI 10.1016/j.intimp.2006.09.015
   NABI IR, 1991, CELL MOTILITY FACTOR, V59, P163
   Nagase T, 1998, DNA Res, V5, P31, DOI 10.1093/dnares/5.1.31
   Nakamura N, 2005, MOL BIOL CELL, V16, P1696, DOI 10.1091/mbc.e04-03-0216
   Nakamura N, 2006, EMBO REP, V7, P1019, DOI 10.1038/sj.embor.7400790
   NATHAN JA, 2008, TRAFFIC
   Newton K, 2007, CANCER INVEST, V25, P502, DOI 10.1080/07357900701508041
   Notredame C, 2000, J MOL BIOL, V302, P205, DOI 10.1006/jmbi.2000.4042
   Ohmura-Hoshino M, 2006, J BIOCHEM, V140, P147, DOI 10.1093/jb/mvj160
   Ohmura-Hoshino M, 2006, J IMMUNOL, V177, P341, DOI 10.4049/jimmunol.177.1.341
   Owen DJ, 1998, SCIENCE, V282, P1327, DOI 10.1126/science.282.5392.1327
   Pickart CM, 2004, CURR OPIN CHEM BIOL, V8, P610, DOI 10.1016/j.cbpa.2004.09.009
   Pickart CM, 2001, ANNU REV BIOCHEM, V70, P503, DOI 10.1146/annurev.biochem.70.1.503
   Pickart CM, 2001, MOL CELL, V8, P499, DOI 10.1016/S1097-2765(01)00347-1
   Ramalho-Santos M, 2002, SCIENCE, V298, P597, DOI 10.1126/science.1072530
   SAITOU N, 1987, MOL BIOL EVOL, V4, P406, DOI 10.1093/oxfordjournals.molbev.a040454
   Sanchez DJ, 2005, J CLIN INVEST, V115, P1369, DOI 10.1172/JCI200524041
   Schwartz RM, 1978, ATLAS PROTEIN SEQ S3, V5, P353
   Shamu CE, 1999, J CELL BIOL, V147, P45, DOI 10.1083/jcb.147.1.45
   Shamu CE, 2001, MOL BIOL CELL, V12, P2546, DOI 10.1091/mbc.12.8.2546
   Songyang Z, 1997, SCIENCE, V275, P73, DOI 10.1126/science.275.5296.73
   Staub O, 2006, PHYSIOL REV, V86, P669, DOI 10.1152/physrev.00020.2005
   Stevenson PG, 2000, P NATL ACAD SCI USA, V97, P8455, DOI 10.1073/pnas.150240097
   Su AI, 2002, P NATL ACAD SCI USA, V99, P4465, DOI 10.1073/pnas.012025199
   Sun Y, 2006, NEOPLASIA, V8, P645, DOI 10.1593/neo.06376
   Tait SWG, 2007, J CELL BIOL, V179, P1453, DOI 10.1083/jcb.200707063
   Tamura K, 2007, MOL BIOL EVOL, V24, P1596, DOI [10.1093/molbev/msm092, 10.1093/molbev/msr121]
   Thibodeau J, 2008, EUR J IMMUNOL, V38, P1225, DOI 10.1002/eji.200737902
   Thomas M, 2008, P NATL ACAD SCI USA, V105, P1656, DOI 10.1073/pnas.0707883105
   Thrower JS, 2000, EMBO J, V19, P94, DOI 10.1093/emboj/19.1.94
   Tirosh B, 2003, J BIOL CHEM, V278, P6664, DOI 10.1074/jbc.M210158200
   Tsai YC, 2007, NAT MED, V13, P1504, DOI 10.1038/nm1686
   Virgin HW, 1997, J VIROL, V71, P5894, DOI 10.1128/JVI.71.8.5894-5904.1997
   Wang XL, 2007, J CELL BIOL, V177, P613, DOI 10.1083/jcb.200611063
   Wang XL, 2006, J BIOL CHEM, V281, P8636, DOI 10.1074/jbc.M513920200
   Wang XL, 2005, J VIROL, V79, P4099, DOI 10.1128/JVI.79.7.4099-4108.2005
   Wang XL, 2004, J VIROL, V78, P8673, DOI 10.1128/JVI.78.16.8673-8686.2004
   WATANABE H, 1991, CANCER RES, V51, P2699
   Wiertz EJHJ, 1996, CELL, V84, P769, DOI 10.1016/S0092-8674(00)81054-5
   Yamasaki S, 2007, EMBO J, V26, P113, DOI 10.1038/sj.emboj.7601490
   Ye YH, 2004, NATURE, V429, P841, DOI 10.1038/nature02656
   Ye YH, 2006, J STRUCT BIOL, V156, P29, DOI 10.1016/j.jsb.2006.01.005
   Yonashiro R, 2006, EMBO J, V25, P3618, DOI 10.1038/sj.emboj.7601249
   Yu H, 1999, J BIOL CHEM, V274, P36852, DOI 10.1074/jbc.274.52.36852
   Yu YYL, 2002, J VIROL, V76, P2796, DOI 10.1128/JVI.76.6.2796-2803.2002
NR 113
TC 38
Z9 39
U1 0
U2 2
PU ACADEMIC PRESS LTD- ELSEVIER SCIENCE LTD
PI LONDON
PA 24-28 OVAL RD, LONDON NW1 7DX, ENGLAND
SN 1044-579X
EI 1096-3650
J9 SEMIN CANCER BIOL
JI Semin. Cancer Biol.
PD DEC
PY 2008
VL 18
IS 6
BP 441
EP 450
DI 10.1016/j.semcancer.2008.09.002
PG 10
WC Oncology
WE Science Citation Index Expanded (SCI-EXPANDED)
SC Oncology
GA 390EX
UT WOS:000262148200009
PM 18948196
OA Green Accepted
DA 2022-04-10
ER

PT J
AU Riley, KJL
   Maher, LJ
AF Riley, Kasandra J. -L.
   Maher, L. James, III
TI Analysis of p53-RNA interactions in cultured human cells
SO BIOCHEMICAL AND BIOPHYSICAL RESEARCH COMMUNICATIONS
LA English
DT Article
DE p53; RNA; UV-cross-linking; formaldehyde; CLIP
ID RNA-PROTEIN INTERACTIONS; IN-VIVO; P53; BINDING; DNA;
   IMMUNOPRECIPITATION; ACETYLATION; ACTIVATION; ELEMENT; CLIP
AB Tumor suppressor p53 is a well-characterized transcription factor that binds DNA. More enigmatic are the RNA-binding properties of p53 and their physiological relevance. We used three sensitive co-immunoprecipitation methods in an attempt to detect RNAs that tightly associate with p53 in cultured human cells. Although recombinant p53 protein binds RNA in a sequence-nonspecific mode, we do not detect specific in vivo RNA binding by p53. These results suggest that RNA binding is prevented by post- translational p53 modifications. A ribonucleoprotein (not p53) is purified by multiple IgG monoclonal antibodies (including anti-p53 antibodies) from both p53 +/+ and p53 null cells. Caution is therefore required in interpreting RNA co-immunoprecipitation experiments. Though not formally excluded, these results do not support models in which p53 binds specific RNA partners in vivo. (C) 2007 Elsevier Inc. All rights reserved.
C1 Mayo Clin, Coll Med, Dept Biochem & Mol Biol, Rochester, MN 55905 USA.
RP Maher, LJ (corresponding author), Mayo Clin, Coll Med, Dept Biochem & Mol Biol, Rochester, MN 55905 USA.
EM maher@mayo.edu
FU NATIONAL INSTITUTE OF GENERAL MEDICAL SCIENCESUnited States Department
   of Health & Human ServicesNational Institutes of Health (NIH) - USANIH
   National Institute of General Medical Sciences (NIGMS) [R01GM068128]
   Funding Source: NIH RePORTER; NIGMS NIH HHSUnited States Department of
   Health & Human ServicesNational Institutes of Health (NIH) - USANIH
   National Institute of General Medical Sciences (NIGMS) [R01 GM068128,
   R01 GM068128-04, GM68128] Funding Source: Medline
CR Baroni TE, 2004, P NATL ACAD SCI USA, V101, P4930, DOI 10.1073/pnas.0401162101
   Bergamaschi D, 2003, NAT GENET, V33, P162, DOI 10.1038/ng1070
   Bourdon JC, 2005, GENE DEV, V19, P2122, DOI 10.1101/gad.1339905
   Bunz F, 1999, J CLIN INVEST, V104, P263, DOI 10.1172/JCI6863
   Fink AL, 2005, CURR OPIN STRUC BIOL, V15, P35, DOI 10.1016/j.sbi.2005.01.002
   FONTOURA BMA, 1992, MOL CELL BIOL, V12, P5145, DOI 10.1128/MCB.12.11.5145
   Friedler A, 2005, STRUCTURE, V13, P629, DOI 10.1016/j.str.2005.01.020
   Galy B, 2001, ONCOGENE, V20, P4613, DOI 10.1038/sj.onc.1204630
   Hall KB, 2002, CURR OPIN STRUC BIOL, V12, P283, DOI 10.1016/S0959-440X(02)00323-8
   Harms KL, 2005, MOL CELL BIOL, V25, P2014, DOI 10.1128/MCB.25.5.2014-2030.2005
   Ivanyi-Nagy R, 2005, CELL MOL LIFE SCI, V62, P1409, DOI 10.1007/s00018-005-5100-9
   Laptenko O, 2006, CELL DEATH DIFFER, V13, P951, DOI 10.1038/sj.cdd.4401916
   Lavin MF, 2006, CELL DEATH DIFFER, V13, P941, DOI 10.1038/sj.cdd.4401925
   Levin JG, 2005, PROG NUCLEIC ACID RE, V80, P217, DOI 10.1016/S0079-6603(05)80006-6
   Mili S, 2004, RNA, V10, P1692, DOI 10.1261/rna.7151404
   Miller SJ, 2000, MOL CELL BIOL, V20, P8420, DOI 10.1128/MCB.20.22.8420-8431.2000
   MOSNER J, 1995, EMBO J, V14, P4442, DOI 10.1002/j.1460-2075.1995.tb00123.x
   Nedbal W, 1997, J MOL BIOL, V266, P677, DOI 10.1006/jmbi.1996.0813
   Niranjanakumari S, 2002, METHODS, V26, P182, DOI 10.1016/S1046-2023(02)00021-X
   OBEROSLER P, 1993, EMBO J, V12, P2389, DOI 10.1002/j.1460-2075.1993.tb05893.x
   Ou YH, 2005, MOL BIOL CELL, V16, P1684, DOI 10.1091/mbc.E04-08-0689
   RILEY JK, 2007, IN PRESS RNA, DOI PMID 17804642
   Riley KJL, 2007, BIOCHEMISTRY-US, V46, P2480, DOI 10.1021/bi061480v
   Riley KJL, 2006, RNA, V12, P620, DOI 10.1261/rna.2286706
   Rohaly G, 2005, CELL, V122, P21, DOI 10.1016/j.cell.2005.04.032
   SAMAD A, 1991, MOL CELL BIOL, V11, P1598, DOI 10.1128/MCB.11.3.1598
   Ule J, 2003, SCIENCE, V302, P1212, DOI 10.1126/science.1090095
   Ule J, 2005, METHODS, V37, P376, DOI 10.1016/j.ymeth.2005.07.018
   Vassilev LT, 2004, SCIENCE, V303, P844, DOI 10.1126/science.1092472
   Yoshida Y, 2004, ONCOGENE, V23, P4371, DOI 10.1038/sj.onc.1207583
   Yoshida Y, 2003, CANCER RES, V63, P3729
NR 31
TC 6
Z9 6
U1 0
U2 4
PU ACADEMIC PRESS INC ELSEVIER SCIENCE
PI SAN DIEGO
PA 525 B ST, STE 1900, SAN DIEGO, CA 92101-4495 USA
SN 0006-291X
J9 BIOCHEM BIOPH RES CO
JI Biochem. Biophys. Res. Commun.
PD NOV 16
PY 2007
VL 363
IS 2
BP 381
EP 387
DI 10.1016/j.bbrc.2007.08.181
PG 7
WC Biochemistry & Molecular Biology; Biophysics
WE Science Citation Index Expanded (SCI-EXPANDED)
SC Biochemistry & Molecular Biology; Biophysics
GA 219XM
UT WOS:000250121500024
PM 17869221
OA Green Accepted
DA 2022-04-10
ER

PT J
AU Tompkins, N
   MacNeill, AJ
   Pohajdak, B
AF Tompkins, Nicholas
   MacNeill, Adam J.
   Pohajdak, Bill
TI Cytohesin-associated scaffolding protein (CASP) is a substrate for
   granzyme B and ubiquitination
SO BIOCHEMICAL AND BIOPHYSICAL RESEARCH COMMUNICATIONS
LA English
DT Article
DE NK cell; CASP; Granzyme B; Ubiquitination
ID CELL-DEATH; T-CELL; IDENTIFICATION; APOPTOSIS; INTERACTS; CLONING;
   FAMILY; GRASP; SNX27; CDNA
AB Natural killer (NK) cells are a sub-population of cytotoxic lymphocytes that can kill tumor or infected cells without prior exposure, by secreting the contents of preformed cytotoxic vesicles, containing perforin and granzymes, at the immune synapse. Cytohesin-associated scaffolding protein (CASP) is an adaptor molecule uniquely expressed in lymphocytes that forms complexes with both vesicle-initiating and sorting proteins, and has roles in NK cell migration, cytotoxicity, and cytokine secretion. In this study, we show that CASP contains a conserved granzyme B cleavage site that could modify its intracellular localization and interaction with sorting nexin 27. We also provide evidence that CASP is modified by ubiquitination. Both of these post-translational modification could rapidly modify CASP function and highlight the dynamic regulatory mechanism that direct its role in NK cell functions. (C) 2014 Elsevier Inc. All rights reserved.
C1 [Tompkins, Nicholas; Pohajdak, Bill] Dalhousie Univ, Dept Biol, Halifax, NS B3H 4R2, Canada.
   [MacNeill, Adam J.] Brock Univ, Dept Hlth Sci, St Catharines, ON L2S 3A1, Canada.
RP Pohajdak, B (corresponding author), Dalhousie Univ, Dept Biol, 5076 Life Sci Bldg,1355 Oxford St, Halifax, NS B3H 4R2, Canada.
EM bill.pohajdak@dal.ca
CR ACHSTETTER T, 1988, J BIOL CHEM, V263, P11711
   Afonina IS, 2010, IMMUNOL REV, V235, P105, DOI 10.1111/j.0105-2896.2010.00908.x
   Backes C, 2005, NUCLEIC ACIDS RES, V33, pW208, DOI 10.1093/nar/gki433
   Bird CH, 2014, CELL DEATH DIFFER, V21, P876, DOI 10.1038/cdd.2014.7
   Boivin WA, 2009, LAB INVEST, V89, P1195, DOI 10.1038/labinvest.2009.91
   Cullen SP, 2008, CELL DEATH DIFFER, V15, P251, DOI 10.1038/sj.cdd.4402244
   DIXON B, 1993, BIOCHIM BIOPHYS ACTA, V1216, P321, DOI 10.1016/0167-4781(93)90165-A
   Ewen CL, 2012, CELL DEATH DIFFER, V19, P28, DOI 10.1038/cdd.2011.153
   Goping IS, 2006, J CELL SCI, V119, P858, DOI 10.1242/jcs.02791
   Gorak-Stolinska P, 2001, J LEUKOCYTE BIOL, V70, P756
   Grabher D, 2013, PLOS ONE, V8, DOI 10.1371/journal.pone.0057538
   Haglund K, 2003, TRENDS BIOCHEM SCI, V28, P598, DOI 10.1016/j.tibs.2003.09.005
   Hiebert PR, 2012, TRENDS MOL MED, V18, P732, DOI 10.1016/j.molmed.2012.09.009
   Ko YH, 2007, LAB INVEST, V87, P241, DOI 10.1038/labinvest.3700517
   Lauffer BEL, 2010, J CELL BIOL, V190, P565, DOI 10.1083/jcb.201004060
   LIU L, 1992, BIOCHIM BIOPHYS ACTA, V1132, P75, DOI 10.1016/0167-4781(92)90055-5
   MacNeil AJ, 2008, J MOL EVOL, V67, P168, DOI 10.1007/s00239-008-9136-y
   MacNeil AJ, 2007, BIOCHEM BIOPH RES CO, V361, P146, DOI 10.1016/j.bbrc.2007.06.183
   MacNeil AJ, 2007, BIOCHEM BIOPH RES CO, V359, P848, DOI 10.1016/j.bbrc.2007.05.162
   MacNeil AJ, 2009, IMMUNOL CELL BIOL, V87, P72, DOI 10.1038/icb.2008.71
   Mansour M, 2002, J BIOL CHEM, V277, P32302, DOI 10.1074/jbc.M202898200
   Matsuura Y, 2014, DEV COMP IMMUNOL, V46, P499, DOI 10.1016/j.dci.2014.06.006
   Meacci E, 1997, P NATL ACAD SCI USA, V94, P1745, DOI 10.1073/pnas.94.5.1745
   Munoz-Pinedo C, 2012, ADV EXP MED BIOL, V738, P124, DOI 10.1007/978-1-4614-1680-7_8
   Nevrivy DJ, 2000, J BIOL CHEM, V275, P16827, DOI 10.1074/jbc.275.22.16827
   Theodoridis AA, 2011, BLOOD, V118, P107, DOI 10.1182/blood-2010-07-294363
   Thiery J, 2011, NAT IMMUNOL, V12, P770, DOI 10.1038/ni.2050
   Thiery J, 2010, BLOOD, V115, P1582, DOI 10.1182/blood-2009-10-246116
   Tompkins N, 2014, BIOCHEM BIOPH RES CO, V451, P165, DOI 10.1016/j.bbrc.2014.07.065
NR 29
TC 2
Z9 2
U1 0
U2 1
PU ACADEMIC PRESS INC ELSEVIER SCIENCE
PI SAN DIEGO
PA 525 B ST, STE 1900, SAN DIEGO, CA 92101-4495 USA
SN 0006-291X
EI 1090-2104
J9 BIOCHEM BIOPH RES CO
JI Biochem. Biophys. Res. Commun.
PD SEP 26
PY 2014
VL 452
IS 3
BP 473
EP 478
DI 10.1016/j.bbrc.2014.08.088
PG 6
WC Biochemistry & Molecular Biology; Biophysics
WE Science Citation Index Expanded (SCI-EXPANDED)
SC Biochemistry & Molecular Biology; Biophysics
GA AQ7UE
UT WOS:000343023900027
PM 25159843
DA 2022-04-10
ER

PT J
AU Marschall, ALJ
   Dubel, S
AF Marschall, Andrea L. J.
   Duebel, Stefan
TI Antibodies inside of a cell can change its outside: Can intrabodies
   provide a new therapeutic paradigm?
SO COMPUTATIONAL AND STRUCTURAL BIOTECHNOLOGY JOURNAL
LA English
DT Review
ID IN-VIVO SELECTION; INTRACELLULAR ANTIBODY; MONOCLONAL-ANTIBODIES;
   ENDOPLASMIC-RETICULUM; LIVING CELLS; GENE-THERAPY; PENETRATING peptide;
   ALZHEIMERS-DISEASE; T-CELLS; PROTEIN
AB Challenges posed by complex diseases such as cancer, chronic viral infections, neurodegenerative disorders and many others have forced researchers to think beyond classic small molecule drugs, exploring new therapeutic strategies such as therapy with RNAi, CRISPR/Cas9 or antibody therapies as single or as combination therapies with existing drugs. While classic antibody therapies based on parenteral application can only reach extracellular target, intracellular application of antibodies could provide specific advantages but is so far little recognized in translational research. Intrabodies allow high specificity and targeting of splice variants or post translational modifications. At the same time off target effects can be minimized by thorough biochemical characterization. Knockdown of cellular proteins by intrabodies has been reported for a significant number of disease-relevant target, including ErbB-2, EGFR, VEGFR-2, Metalloproteinase MMP2 and MMP9, beta-amyloid protein, alpha-synuclein, HIV gp120, HCV core and many others. This review outlines the recent advances in ER intrabody technology and their potential use in therapy. (C) 2016 Marschall, Dubel. Published by Elsevier B.V. on behalf of the Research Network of Computational and Structural Biotechnology.
C1 [Marschall, Andrea L. J.] Helmholtz Ctr Infect Res, Dept Syst Immunol, Braunschweig, Germany.
   [Marschall, Andrea L. J.] Helmholtz Ctr Infect Res, Braunschweig Integrated Ctr Syst Biol, Braunschweig, Germany.
   [Duebel, Stefan] Tech Univ Carolo Wilhelmina Braunschweig, Inst Biochem Biotechnol & Bioinformat, Spielmannstr 7, D-38106 Braunschweig, Germany.
RP Dubel, S (corresponding author), Tech Univ Carolo Wilhelmina Braunschweig, Inst Biochem Biotechnol & Bioinformat, Spielmannstr 7, D-38106 Braunschweig, Germany.
EM s.duebel@tu-bs.de
RI Marschall, Andrea L. J./AAU-2263-2020
OI Marschall, Andrea L. J./0000-0002-9505-0427; Dubel,
   Stefan/0000-0001-8811-7390
FU foundation Peter und Traudl Engelhorn-Stiftung zur Forderung der
   Biotechnologie und Gentechnologie (Germany)
FX We acknowledge financial support by the foundation Peter und Traudl
   Engelhorn-Stiftung zur Forderung der Biotechnologie und Gentechnologie
   (Germany).
CR Accardi L, 2014, INT J CANCER, V134, P2742, DOI 10.1002/ijc.28604
   Amici C, 2016, ONCOTARGET, V7, P15539, DOI 10.18632/oncotarget.6925
   Backhaus O, 2016, RNA INTERFERENCE
   Behr JP, 1997, CHIMIA, V51, P34
   BIOCCA S, 1995, BIO-TECHNOL, V13, P1110, DOI 10.1038/nbt1095-1110
   Blokzijl A, 2016, MOL CELL PROTEOMICS
   BLOSE SH, 1984, J CELL BIOL, V98, P847, DOI 10.1083/jcb.98.3.847
   Braun SE, 2012, HUM GENE THER, V23, P917, DOI 10.1089/hum.2011.184
   Buning H, 2015, CURR OPIN PHARMACOL, V24, P94, DOI 10.1016/j.coph.2015.08.002
   Butler DC, 2012, PROG NEUROBIOL, V97, P190, DOI 10.1016/j.pneurobio.2011.11.004
   Cardinale A, 2005, J BIOL CHEM, V280, P685, DOI 10.1074/jbc.M407360200
   Cardinale A, 2015, EXP CELL RES, V338, P70, DOI 10.1016/j.yexcr.2015.09.006
   Colwill K, 2011, NAT METHODS, V8, P551, DOI [10.1038/NMETH.1607, 10.1038/nmeth.1607]
   Desplancq D, 2016, EXP CELL RES, V342, P145, DOI 10.1016/j.yexcr.2016.03.003
   Donini M, 2003, J MOL BIOL, V330, P323, DOI 10.1016/S0022-2836(03)00530-8
   Doudna JA, 2014, SCIENCE, V346, P1077, DOI 10.1126/science.1258096
   El-Sayed A, 2009, AAPS J, V11, P13, DOI 10.1208/s12248-008-9071-2
   Fisher AC, 2009, J MOL BIOL, V385, P299, DOI 10.1016/j.jmb.2008.10.051
   Freund G, 2013, MABS-AUSTIN, V5, P518, DOI 10.4161/mabs.25084
   Ghadge GD, 2013, NEUROBIOL DIS, V56, P74, DOI 10.1016/j.nbd.2013.04.007
   Graslund S, 2008, NAT METHODS, V5, P135, DOI 10.1038/nmeth.f.202
   Hastie E, 2015, HUM GENE THER, V26, P257, DOI 10.1089/hum.2015.025
   Jendreyko N, 2005, P NATL ACAD SCI USA, V102, P8293, DOI 10.1073/pnas.0503168102
   Kaiser PD, 2014, BBA-PROTEINS PROTEOM, V1844, P1933, DOI 10.1016/j.bbapap.2014.04.019
   Kaufmann KB, 2013, EMBO MOL MED, V5, P1642, DOI 10.1002/emmm.201202287
   Kugler J, 2015, BMC BIOTECHNOL, V15, DOI 10.1186/s12896-015-0125-0
   Lee S, 2016, BIOTECHNOL J, V11, P565, DOI 10.1002/biot.201500364
   LEWIS MJ, 1992, CELL, V68, P353, DOI 10.1016/0092-8674(92)90476-S
   Lo A. S. -Y., 2008, V181, P343
   Marschall AL, 2015, MABS
   Marschall AL, 2014, MABS, V6
   Marschall ALJ, 2016, ADV EXP MED BIOL, V917, P77, DOI 10.1007/978-3-319-32805-8_5
   Marschall ALJ, 2014, MABS-AUSTIN, V6, P943, DOI 10.4161/mabs.29268
   Marschall ALJ, 2011, MABS-AUSTIN, V3, P3, DOI 10.4161/mabs.3.1.14110
   Maur AAD, 2004, METHODS, V34, P215, DOI 10.1016/j.ymeth.2004.04.004
   Mersmann M, 2010, NEW BIOTECHNOL, V27, P118, DOI 10.1016/j.nbt.2009.10.007
   Ordonez A, 2015, FASEB J, V29, P2667, DOI 10.1096/fj.14-267351
   Popkov M, 2005, CANCER RES, V65, P972
   Richard JP, 2003, J BIOL CHEM, V278, P585, DOI 10.1074/jbc.M209548200
   Ryan DA, 2010, MOL THER, V18, P1471, DOI 10.1038/mt.2010.111
   Shaki-Loewenstein S, 2005, J IMMUNOL METHODS, V303, P19, DOI 10.1016/j.jim.2005.05.004
   Snyder-Keller A, 2010, J NEUROPATH EXP NEUR, V69, P1078, DOI 10.1097/NEN.0b013e3181f530ec
   Steinberger P, 2000, P NATL ACAD SCI USA, V97, P805, DOI 10.1073/pnas.97.2.805
   Stocks M, 2005, CURR OPIN CHEM BIOL, V9, P359, DOI 10.1016/j.cbpa.2005.06.003
   Sudol KL, 2009, MOL THER, V17, P2031, DOI 10.1038/mt.2009.174
   Suzuki R, 2016, J GEN VIROL, V97, P887, DOI 10.1099/jgv.0.000423
   Swan CH, 2006, GENE THER, V13, P1480, DOI 10.1038/sj.gt.3302801
   Tanaka Tomoyuki, 2012, Methods Mol Biol, V911, P151, DOI 10.1007/978-1-61779-968-6_10
   VALLE G, 1982, NATURE, V300, P71, DOI 10.1038/300071a0
   Visintin M, 2002, J MOL BIOL, V317, P73, DOI 10.1006/jmbi.2002.5392
   Visintin M, 2008, J BIOTECHNOL, V135, P1, DOI 10.1016/j.jbiotec.2008.02.012
   Ye DJ, 2002, PHARMACEUT RES, V19, P1302, DOI 10.1023/A:1020346607764
   Zehner M, 2015, IMMUNITY, V42, P850, DOI 10.1016/j.immuni.2015.04.008
   Zeng J, 2015, J IMMUNOL METHODS, V426, P140, DOI 10.1016/j.jim.2015.08.009
   Zhang CC, 2012, PLOS ONE, V7, DOI 10.1371/journal.pone.0030684
   Zhou C, 2004, MOL THER, V10, P1023, DOI 10.1016/j.ymthe.2004.08.019
NR 56
TC 33
Z9 36
U1 0
U2 8
PU ELSEVIER SCIENCE BV
PI AMSTERDAM
PA PO BOX 211, 1000 AE AMSTERDAM, NETHERLANDS
SN 2001-0370
J9 COMPUT STRUCT BIOTEC
JI Comp. Struct. Biotechnol. J..
PY 2016
VL 14
BP 304
EP 308
DI 10.1016/j.csbj.2016.07.003
PG 5
WC Biochemistry & Molecular Biology; Biotechnology & Applied Microbiology
WE Science Citation Index Expanded (SCI-EXPANDED)
SC Biochemistry & Molecular Biology; Biotechnology & Applied Microbiology
GA EI6TO
UT WOS:000392630000036
PM 27570612
OA gold, Green Published
DA 2022-04-10
ER

PT J
AU Gonzalez-Cano, L
   Hillje, AL
   Fuertes-Alvarez, S
   Marques, MM
   Blanch, A
   Ian, RW
   Irwin, MS
   Schwamborn, JC
   Marin, MC
AF Gonzalez-Cano, L.
   Hillje, A-L
   Fuertes-Alvarez, S.
   Marques, M. M.
   Blanch, A.
   Ian, R. W.
   Irwin, M. S.
   Schwamborn, J. C.
   Marin, M. C.
TI Regulatory feedback loop between TP73 and TRIM32
SO CELL DEATH & DISEASE
LA English
DT Article
DE p73; TRIM32; ubiquitination; transactivation; E3 ligase; neural
   differentiation
ID P73 TRANSCRIPTIONAL ACTIVITY; TUMOR-SUPPRESSOR FUNCTIONS; MOUSE NEURAL
   PROGENITORS; STEM-CELLS; P53 FAMILY; NEURONAL DIFFERENTIATION;
   SELF-RENEWAL; PROTEIN; UBIQUITIN; LIGASE
AB The p73 transcription factor is one of the members of the p53 family of tumor suppressors with unique biological functions in processes like neurogenesis, embryonic development and differentiation. For this reason, p73 activity is tightly regulated by multiple mechanism, including transcription and post-translational modification. Here, we identified a novel regulatory loop between TAp73 and the E3 ubiquitinationligase tripartite motif protein 32 (TRIM32). TRIM32, a new direct p73 transcriptional target in the context of neural progenitor cells, is differentially regulated by p73. Although TAp73 binds to the TRIM32 promoter and activates its expression, TAp73-induced TRIM32 expression is efficiently repressed by DNp73. TRIM32 in turn physically interacts with TAp73 and promotes its ubiquitination and degradation, impairing p73-dependent transcriptional activity. This mutual regulation between p73 and TRIM32 constitutes a novel feedback loop, which might have important implications in central nervous system development as well as relevance in oncogenesis, and thus emerges as a possible therapeutic target.
C1 [Gonzalez-Cano, L.; Fuertes-Alvarez, S.; Marin, M. C.] Univ Leon, Inst Biomed IBIOMED, Dept Mol Biol, E-24071 Leon, Spain.
   [Hillje, A-L; Schwamborn, J. C.] Univ Munster, ZMBE, Inst Cell Biol, Stem Cell Biol & Regenerat Grp, D-48149 Munster, Germany.
   [Hillje, A-L; Schwamborn, J. C.] Univ Luxembourg, LCSB, L-4362 Esch Belval, Luxembourg.
   [Marques, M. M.] Univ Leon, Inst Desarrollo Ganadero, E-24071 Leon, Spain.
   [Blanch, A.; Ian, R. W.; Irwin, M. S.] Univ Toronto, Dept Pediat, Toronto, ON M5G 1X8, Canada.
   [Blanch, A.; Ian, R. W.; Irwin, M. S.] Hosp Sick Children, Toronto, ON M5G 1X8, Canada.
RP Marin, MC (corresponding author), Univ Leon, Inst Biomed IBIOMED, Dept Mol Biol, Campus Vegazana, E-24071 Leon, Spain.
EM carmen.marin@unileon.es
RI Marín Vieira, María del Carmen/B-8108-2015; Marques, Margarita
   M/I-1260-2015; Marin, Maria C/G-1040-2010; Schwamborn, Jens
   C/F-9395-2011
OI Marín Vieira, María del Carmen/0000-0002-7149-287X; Marques, Margarita
   M/0000-0003-2818-035X; Marin, Maria C/0000-0002-7149-287X; Schwamborn,
   Jens C/0000-0003-4496-0559; Fuertes Alvarez, Sandra/0000-0002-5882-0410;
   Watson, Ian/0000-0002-6025-3080
FU Spanish Ministerio de Ciencia e InnovacionInstituto de Salud Carlos
   IIISpanish Government [SAF2009-07897, SAF2012-36143]; Junta de Castilla
   y LeonJunta de Castilla y Leon [LE015A10-2]; German Research Foundation
   (DFG: Emmy Noether Program)German Research Foundation (DFG)
   [SCHW1392/2-1, SFB629, SPP1356, SCHW1392/4-1]; Canadian Cancer Society
   Research InstituteCanadian Cancer Society (CCS) [CCSRI 2010-700580]
FX This work was supported by Grants SAF2009-07897 and SAF2012-36143 from
   Spanish Ministerio de Ciencia e Innovacion (to MCM), Grant LE015A10-2
   from the Junta de Castilla y Leon (to MCM), grants from the German
   Research Foundation (DFG: Emmy Noether Program, SCHW1392/2-1; SFB629 and
   SPP1356, SCHW1392/4-1) (to JCS) and grant from the Canadian Cancer
   Society Research Institute (CCSRI 2010-700580) (to MSI).
CR Agostini M, 2011, P NATL ACAD SCI USA, V108, P21099, DOI 10.1073/pnas.1112063108
   Agostini M, 2010, BIOCHEM BIOPH RES CO, V403, P13, DOI 10.1016/j.bbrc.2010.10.087
   Albor A, 2007, MOL CARCINOGEN, V46, P585, DOI 10.1002/mc.20344
   Armesilla-Diaz A, 2009, NEUROSCIENCE, V158, P1378, DOI 10.1016/j.neuroscience.2008.10.052
   Billon N, 2004, DEVELOPMENT, V131, P1211, DOI 10.1242/dev.01035
   Boominathan L, 2010, PLOS ONE, V5, DOI 10.1371/journal.pone.0010615
   De Laurenzi V, 2000, BIOCHEM BIOPH RES CO, V273, P342, DOI 10.1006/bbrc.2000.2932
   De Laurenzi V, 2000, J BIOL CHEM, V275, P15226, DOI 10.1074/jbc.275.20.15226
   DONEHOWER LA, 1992, NATURE, V356, P215, DOI 10.1038/356215a0
   Fang L, 1999, J CELL BIOL, V147, P823, DOI 10.1083/jcb.147.4.823
   Fernandez-Garcia B, 2007, CELL DEATH DIFFER, V14, P254, DOI 10.1038/sj.cdd.4401945
   Flores ER, 2005, CANCER CELL, V7, P363, DOI 10.1016/j.ccr.2005.02.019
   Fujitani M, 2010, CURR BIOL, V20, P2058, DOI 10.1016/j.cub.2010.10.029
   Gonzalez-Cano L, 2010, CELL DEATH DIS, V1, DOI 10.1038/cddis.2010.87
   Hammell CM, 2009, CELL, V136, P926, DOI 10.1016/j.cell.2009.01.053
   Hillje AL, 2011, STEM CELLS, V29, P1437, DOI 10.1002/stem.687
   Horn EJ, 2004, CARCINOGENESIS, V25, P157, DOI 10.1093/carcin/bgh003
   Ishimoto O, 2002, CANCER RES, V62, P636
   Jacobs WB, 2006, J NEUROCHEM, V97, P1571, DOI 10.1111/j.1471-4159.2006.03980.x
   Jost CA, 1997, NATURE, V389, P191, DOI 10.1038/38298
   Jung MS, 2001, ONCOGENE, V20, P5818, DOI 10.1038/sj.onc.1204748
   Kano S, 2008, CANCER RES, V68, P5572, DOI 10.1158/0008-5472.CAN-07-6231
   Killick R, 2011, MOL NEUROBIOL, V43, P139, DOI 10.1007/s12035-011-8172-6
   Kudryashova E, 2009, HUM MOL GENET, V18, P1353, DOI 10.1093/hmg/ddp036
   Lau LMS, 2008, ONCOGENE, V27, P997, DOI 10.1038/sj.onc.1210707
   Lin Y, 2012, BMC CELL BIOL, V13, DOI 10.1186/1471-2121-13-9
   Liu G, 2004, MOL CELL BIOL, V24, P487, DOI 10.1128/MCB.24.2.487-501.2004
   Marin MC, 1998, MOL CELL BIOL, V18, P6316, DOI 10.1128/MCB.18.11.6316
   Marques-Garcia F, 2009, J BIOL CHEM, V284, P21139, DOI 10.1074/jbc.M109.026849
   Morgunkova AA, 2005, BIOCHEMISTRY-MOSCOW+, V70, P955, DOI 10.1007/s10541-005-0210-4
   Nicklas S, 2012, PLOS ONE, V7, DOI 10.1371/journal.pone.0030445
   Peschiaroli A, 2009, ONCOGENE, V28, P3157, DOI 10.1038/onc.2009.177
   Reymond A, 2001, EMBO J, V20, P2140, DOI 10.1093/emboj/20.9.2140
   Reynolds BA, 1996, DEV BIOL, V175, P1, DOI 10.1006/dbio.1996.0090
   Rosenbluth JM, 2008, GENE DEV, V22, P2591, DOI 10.1101/gad.1727408
   Sato T, 2012, BIOCHEM BIOPH RES CO, V417, P594, DOI 10.1016/j.bbrc.2011.12.012
   Sayan BS, 2010, P NATL ACAD SCI USA, V107, P12877, DOI 10.1073/pnas.0911828107
   Sbisa E, 2007, BMC BIOINFORMATICS, V8, DOI 10.1186/1471-2105-8-S1-S20
   Schwamborn JC, 2009, CELL, V136, P913, DOI 10.1016/j.cell.2008.12.024
   SNYDER EY, 1992, CELL, V68, P33, DOI 10.1016/0092-8674(92)90204-P
   Talos F, 2010, CELL DEATH DIFFER, V17, P1816, DOI 10.1038/cdd.2010.131
   Tomasini R, 2008, GENE DEV, V22, P2677, DOI 10.1101/gad.1695308
   Vicario-Abejon C, 2003, J NEUROSCI, V23, P895
   Watson IR, 2006, J BIOL CHEM, V281, P34096, DOI 10.1074/jbc.M603654200
   Watson IR, 2006, NEOPLASIA, V8, P655, DOI 10.1593/neo.06439
   Wu H, 2011, MOL CANCER RES, V9, P1780, DOI 10.1158/1541-7786.MCR-11-0157
   Wu LQ, 2004, ONCOGENE, V23, P4032, DOI 10.1038/sj.onc.1207538
   Yang A, 2000, NATURE, V404, P99, DOI 10.1038/35003607
   Zaika AI, 2002, J EXP MED, V196, P765, DOI 10.1084/jem.20020179
NR 49
TC 26
Z9 26
U1 0
U2 10
PU NATURE PUBLISHING GROUP
PI LONDON
PA MACMILLAN BUILDING, 4 CRINAN ST, LONDON N1 9XW, ENGLAND
SN 2041-4889
J9 CELL DEATH DIS
JI Cell Death Dis.
PD JUL
PY 2013
VL 4
AR e704
DI 10.1038/cddis.2013.224
PG 10
WC Cell Biology
WE Science Citation Index Expanded (SCI-EXPANDED)
SC Cell Biology
GA 192US
UT WOS:000322512100005
PM 23828567
OA Green Published, gold
DA 2022-04-10
ER

PT J
AU Kaushal, K
   Woo, SH
   Tyagi, A
   Kim, DH
   Suresh, B
   Kim, KS
   Ramakrishna, S
AF Kaushal, Kamini
   Woo, Sang Hyeon
   Tyagi, Apoorvi
   Kim, Dong Ha
   Suresh, Bharathi
   Kim, Kye-Seong
   Ramakrishna, Suresh
TI E3 ubiquitinationLigase APC/C-Cdh1 Negatively Regulates FAH Protein
   Stability by Promoting Its Polyubiquitination
SO INTERNATIONAL JOURNAL OF MOLECULAR SCIENCES
LA English
DT Article
DE CRISPR; Cas9 knockout; in silico analysis; liver cancer;
   post-translational modification; ubiquitin-proteasome system
ID HUMAN FUMARYLACETOACETATE HYDROLASE; HEREDITARY TYROSINEMIA;
   CRYSTAL-STRUCTURE; GENE; DEFICIENCY; METABOLITE; DELIVERY; NETWORK;
   TYPE-1; CDH1
AB Fumarylacetoacetate hydrolase (FAH) is the last enzyme in the degradation pathway of the amino acids tyrosine and phenylalanine in mammals that catalyzes the hydrolysis of 4-fumarylacetoacetate into acetoacetate and fumarate. Mutations of the FAH gene are associated with hereditary tyrosinemia type I (HT1), resulting in reduced protein stability, misfolding, accelerated degradation and deficiency in functional proteins. Identifying E3 ligases, which are necessary for FAH protein stability and degradation, is essential. In this study, we demonstrated that the FAH protein level is elevated in liver cancer tissues compared to that in normal tissues. Further, we showed that the FAH protein undergoes 26S proteasomal degradation and its protein turnover is regulated by the anaphase-promoting complex/cyclosome-Cdh1 (APC/C)(Cdh1) E3 ubiquitinationligase complex. APC/C-Cdh1 acts as a negative stabilizer of FAH protein by promoting FAH polyubiquitination and decreases the half-life of FAH protein. Thus, we envision that Cdh1 might be a key factor in the maintenance of FAH protein level to regulate FAH-mediated physiological functions.
C1 [Kaushal, Kamini; Woo, Sang Hyeon; Tyagi, Apoorvi; Kim, Dong Ha; Suresh, Bharathi; Kim, Kye-Seong; Ramakrishna, Suresh] Hanyang Univ, Grad Sch Biomed Sci & Engn, Seoul 04763, South Korea.
   [Kim, Kye-Seong; Ramakrishna, Suresh] Hanyang Univ, Coll Med, Seoul 04763, South Korea.
RP Kim, KS; Ramakrishna, S (corresponding author), Hanyang Univ, Grad Sch Biomed Sci & Engn, Seoul 04763, South Korea.; Kim, KS; Ramakrishna, S (corresponding author), Hanyang Univ, Coll Med, Seoul 04763, South Korea.
EM kaminikaushal10@gmail.com; tkdgus78902@gmail.com;
   apoorvityagi09@gmail.com; donha01@naver.com; bharathi.suri@gmail.com;
   ks66kim@hanyang.ac.kr; suri28@hanyang.ac.kr
RI Ramakrishna, Suresh/AAX-4096-2021
OI Ramakrishna, Suresh/0000-0002-4038-1085
FU National Research Foundation [2017M3A9B3061830, 2018M3A9H3022412]
FX This research was supported by the National Research Foundation
   (2017M3A9B3061830 and 2018M3A9H3022412).
CR Adler J, 2010, CYTOM PART A, V77A, P733, DOI 10.1002/cyto.a.20896
   AGSTERIBBE E, 1990, NUCLEIC ACIDS RES, V18, P1887, DOI 10.1093/nar/18.7.1887
   Antao AM, 2020, CANCERS, V12, DOI 10.3390/cancers12061579
   Bateman A, 2017, NUCLEIC ACIDS RES, V45, pD158, DOI 10.1093/nar/gkw1099
   Bateman RL, 2007, BIOCHEM J, V402, P251, DOI 10.1042/BJ20060961
   Bateman RL, 2001, J BIOL CHEM, V276, P15284, DOI 10.1074/jbc.M007621200
   BERGER R, 1981, CLIN CHIM ACTA, V114, P37, DOI 10.1016/0009-8981(81)90225-4
   Cassiman D, 2009, ORPHANET J RARE DIS, V4, DOI 10.1186/1750-1172-4-28
   Dimova NV, 2012, NAT CELL BIOL, V14, P168, DOI 10.1038/ncb2425
   FALLSTROM SP, 1979, PEDIATR RES, V13, P78, DOI 10.1203/00006450-197901000-00056
   Hershko A, 1998, ANNU REV BIOCHEM, V67, P425, DOI 10.1146/annurev.biochem.67.1.425
   Huttlin EL, 2015, CELL, V162, P425, DOI 10.1016/j.cell.2015.06.043
   Jorquera R, 1997, BIOCHEM BIOPH RES CO, V232, P42, DOI 10.1006/bbrc.1997.6220
   Jorquera R, 2001, HUM MOL GENET, V10, P1741, DOI 10.1093/hmg/10.17.1741
   Kaushal K, 2018, DRUG DISCOV TODAY, V23, P1974, DOI 10.1016/j.drudis.2018.05.035
   Kevei E, 2017, FEBS LETT, V591, P2616, DOI 10.1002/1873-3468.12750
   Kim S, 2014, GENOME RES, V24, P1012, DOI 10.1101/gr.171322.113
   Kirstein MM, 2014, ACTA GASTRO-ENT BELG, V77, P386
   KVITTINGEN EA, 1986, SCAND J CLIN LAB INV, V46, P27
   LABELLE Y, 1993, HUM MOL GENET, V2, P941, DOI 10.1093/hmg/2.7.941
   Lau AW, 2013, CELL RES, V23, P947, DOI 10.1038/cr.2013.67
   LINDBLAD B, 1977, P NATL ACAD SCI USA, V74, P4641, DOI 10.1073/pnas.74.10.4641
   Lukas C, 1999, NATURE, V401, P815, DOI 10.1038/44611
   Macias I, 2019, J BIOL CHEM, V294, P13051, DOI 10.1074/jbc.RA119.009367
   Maestre C, 2008, EMBO J, V27, P2736, DOI 10.1038/emboj.2008.195
   Malik S, 2015, JIMD REP, V18, P13, DOI 10.1007/8904_2014_337
   Medes G, 1932, BIOCHEM J, V26, P917, DOI 10.1042/bj0260917
   Meyer HJ, 2011, SEMIN CELL DEV BIOL, V22, P544, DOI 10.1016/j.semcdb.2011.03.009
   Mohamed Sarar, 2013, BMC Res Notes, V6, P362, DOI 10.1186/1756-0500-6-362
   Parthasarathy A, 2018, FRONT MOL BIOSCI, V5, DOI 10.3389/fmolb.2018.00029
   Peters JM, 2006, NAT REV MOL CELL BIO, V7, P644, DOI 10.1038/nrm1988
   PHANEUF D, 1991, AM J HUM GENET, V48, P525
   Pines J, 2011, NAT REV MOL CELL BIO, V12, P427, DOI 10.1038/nrm3132
   Ramakrishna S, 2014, GENOME RES, V24, P1020, DOI 10.1101/gr.171264.113
   Ran TT, 2013, BIOCHEM J, V449, P51, DOI 10.1042/BJ20120913
   Reis A, 2006, EMBO REP, V7, P1040, DOI 10.1038/sj.embor.7400772
   Sarodaya N, 2020, INT J MOL SCI, V21, DOI 10.3390/ijms21144996
   Shao R, 2016, CELL RES, V26, P699, DOI 10.1038/cr.2016.51
   Singh SK, 2018, SCI REP-UK, V8, DOI 10.1038/s41598-018-19643-0
   Taipale M, 2014, CELL, V158, P434, DOI 10.1016/j.cell.2014.05.039
   Weiss AKH, 2020, MECH AGEING DEV, V190, DOI 10.1016/j.mad.2020.111284
   Yang SZ, 2019, P NATL ACAD SCI USA, V116, P22229, DOI 10.1073/pnas.1904485116
   Yoshida Y, 2015, P NATL ACAD SCI USA, V112, P4630, DOI 10.1073/pnas.1422313112
   Zuo DM, 2016, FRONT IMMUNOL, V7, DOI 10.3389/fimmu.2016.00075
NR 44
TC 1
Z9 1
U1 0
U2 2
PU MDPI
PI BASEL
PA ST ALBAN-ANLAGE 66, CH-4052 BASEL, SWITZERLAND
EI 1422-0067
J9 INT J MOL SCI
JI Int. J. Mol. Sci.
PD NOV
PY 2020
VL 21
IS 22
AR 8719
DI 10.3390/ijms21228719
PG 17
WC Biochemistry & Molecular Biology; Chemistry, Multidisciplinary
WE Science Citation Index Expanded (SCI-EXPANDED)
SC Biochemistry & Molecular Biology; Chemistry
GA OY3YY
UT WOS:000594186500001
PM 33218190
OA Green Published, gold
DA 2022-04-10
ER

PT J
AU Kubiak, JZ
   Prigent, C
AF Kubiak, Jacek Z.
   Prigent, Claude
TI Aurora-A: an expedition to the pole of the spindle in Xenopus egg
   extracts
SO INTERNATIONAL JOURNAL OF DEVELOPMENTAL BIOLOGY
LA English
DT Review
DE Aurora-A; Eg2; Ipl1; cell-free extract; Xenopus laevis; TPX2; spindle
   assembly
ID LAEVIS OOCYTE MATURATION; MATERNAL MESSENGER-RNAS; KINESIN-RELATED
   PROTEIN; CANCER-CELL-LINES; SMALL GTPASE RAN; IMPORTIN-BETA; SIGNALING
   PATHWAY; II TRANSITION; KINASE PEG2; D-TACC
AB The aim of this short review is to describe the contribution of Xenopus laevis egg extracts to the discovery and understanding of the regulation and function of the serine/threonine kinase Aurora-A. The power of these extracts to recapitulate cell cycle events makes them a precious tool to decipher complex biological processes at the molecular level, including the mechanism that affect Aurora-A (post-translational modification) and mechanism in which Aurora-A plays a crucial role (bipolar spindle assembly). We focus on the results obtained in cell-free extracts, but we also give an updated overview of Aurora A functions found in other systems.
C1 [Kubiak, Jacek Z.; Prigent, Claude] CNRS, UMR6290, Rennes, France.
   [Kubiak, Jacek Z.; Prigent, Claude] Univ Rennes 1, Inst Genet & Dev Rennes, UEB, F-35000 Rennes, France.
   [Kubiak, Jacek Z.] Mil Inst Hyg & Epidemiol, Dept Hyg & Physiol, Warsaw, Poland.
RP Prigent, C (corresponding author), Univ Rennes 1, IGDR, CNRS, UMR6290, 2 Ave Pr Leon Bernard, F-35043 Rennes, France.
EM claude.prigent@univ-rennes1.fr
OI Kubiak, Jacek Z./0000-0003-2772-5127
CR Adams RR, 2000, CURR BIOL, V10, P1075, DOI 10.1016/S0960-9822(00)00673-4
   Albee AJ, 2006, J BIOL CHEM, V281, P38293, DOI 10.1074/jbc.M607203200
   Andresson T, 1998, EMBO J, V17, P5627, DOI 10.1093/emboj/17.19.5627
   Arlot-Bonnemains Y, 2001, FEBS LETT, V508, P149, DOI 10.1016/S0014-5793(01)03048-4
   Barros TP, 2005, J CELL BIOL, V170, P1039, DOI 10.1083/jcb.200504097
   Bischoff JR, 1998, EMBO J, V17, P3052, DOI 10.1093/emboj/17.11.3052
   BOUVET P, 1994, MOL CELL BIOL, V14, P1893, DOI 10.1128/MCB.14.3.1893
   Castro A, 2002, EMBO REP, V3, P457, DOI 10.1093/embo-reports/kvf095
   Castro A, 2003, J BIOL CHEM, V278, P2236, DOI 10.1074/jbc.M207894200
   Castro A, 2002, EMBO REP, V3, P1209, DOI 10.1093/embo-reports/kvf241
   CHAN CSM, 1993, GENETICS, V135, P677
   D'Assoro AB, 2016, FRONT ONCOL, V5, DOI 10.3389/fonc.2015.00295
   Detivaud L, 2003, J CELL SCI, V116, P2697, DOI 10.1242/jcs.00477
   ELETR M, 1979, SCIENCE, V205, P1397, DOI 10.1126/science.472755
   Eyers PA, 2003, CURR BIOL, V13, P691, DOI 10.1016/S0960-9822(03)00166-0
   Eyers PA, 2005, CELL CYCLE, V4, P784, DOI 10.4161/cc.4.6.1693
   Eyers PA, 2004, J BIOL CHEM, V279, P9008, DOI 10.1074/jbc.M312424200
   FORTUNE JE, 1975, BIOL REPROD, V13, P561, DOI 10.1095/biolreprod13.5.561
   Frank-Vaillant M, 2000, J CELL SCI, V113, P1127
   Giet R, 2002, J CELL BIOL, V156, P437, DOI 10.1083/jcb.200108135
   GLOVER DM, 1995, CELL, V81, P95, DOI 10.1016/0092-8674(95)90374-7
   Gruss OJ, 2001, CELL, V104, P83, DOI 10.1016/S0092-8674(01)00193-3
   Hans F, 2009, MOL BIOL CELL, V20, P3491, DOI 10.1091/mbc.E09-05-0370
   Haydon CE, 2003, MOL CELL PROTEOMICS, V2, P1055, DOI 10.1074/mcp.M300054-MCP200
   Honda K, 2000, ONCOGENE, V19, P2812, DOI 10.1038/sj.onc.1203609
   Hsu JY, 2000, CELL, V102, P279, DOI 10.1016/S0092-8674(00)00034-9
   James-Zorn C, 2015, GENESIS, V53, P486, DOI 10.1002/dvg.22873
   Kalab P, 1999, CURR BIOL, V9, P481, DOI 10.1016/S0960-9822(99)80213-9
   Katayama H, 2004, NAT GENET, V36, P55, DOI 10.1038/ng1279
   Kinoshita K, 2005, J CELL BIOL, V170, P1047, DOI 10.1083/jcb.200503023
   Koffa MD, 2006, CURR BIOL, V16, P743, DOI 10.1016/j.cub.2006.03.056
   Komrskova P, 2014, PLOS ONE, V9, DOI 10.1371/journal.pone.0101222
   Krystyniak A, 2006, ONCOGENE, V25, P338, DOI 10.1038/sj.onc.1209056
   Kufer TA, 2002, J CELL BIOL, V158, P617, DOI 10.1083/jcb.200204155
   Lawrence CJ, 2004, J CELL BIOL, V167, P19, DOI 10.1083/jcb.200408113
   LEGAGNEUX V, 1992, DEVELOPMENT, V116, P1193
   LEGUELLEC R, 1991, MOL CELL BIOL, V11, P3395, DOI 10.1128/MCB.11.6.3395
   Li QY, 2004, J BIOL CHEM, V279, P52175, DOI 10.1074/jbc.M406802200
   Littlepage LE, 2002, GENE DEV, V16, P2274, DOI 10.1101/gad.1007302
   Littlepage LE, 2002, P NATL ACAD SCI USA, V99, P15440, DOI 10.1073/pnas.202606599
   Ma CQ, 2003, MOL CELL BIOL, V23, P1703, DOI 10.1128/MCB.23.5.1703-1716.2003
   Maller JL, 2012, J BIOL CHEM, V287, P21640, DOI 10.1074/jbc.X112.371161
   Marugan C, 2016, FRONT ONCOL, V5, DOI 10.3389/fonc.2015.00299
   Maton G, 2003, J BIOL CHEM, V278, P21439, DOI 10.1074/jbc.M300811200
   Mendez R, 2000, NATURE, V404, P302, DOI 10.1038/35005126
   Nachury MV, 2001, CELL, V104, P95, DOI 10.1016/S0092-8674(01)00194-5
   O'Brien LL, 2005, MOL BIOL CELL, V16, P2836, DOI 10.1091/mbc.E04-10-0926
   PARIS J, 1990, DEV BIOL, V140, P221, DOI 10.1016/0012-1606(90)90070-Y
   Pascreau G, 2005, J BIOL CHEM, V280, P13415, DOI 10.1074/jbc.M410584200
   Pascreau G, 2008, DEV BIOL, V317, P523, DOI 10.1016/j.ydbio.2008.02.053
   Reboutier D, 2012, J CELL BIOL, V197, P19, DOI 10.1083/jcb.201107134
   Roghi C, 1998, J CELL SCI, V111, P557
   Sardon T, 2008, EMBO J, V27, P2567, DOI 10.1038/emboj.2008.173
   Sarkissian M, 2004, GENE DEV, V18, P48, DOI 10.1101/gad.1136004
   SAWIN KE, 1991, J CELL BIOL, V112, P925, DOI 10.1083/jcb.112.5.925
   Sen S, 1997, ONCOGENE, V14, P2195, DOI 10.1038/sj.onc.1201065
   Sillje HHW, 2006, CURR BIOL, V16, P731, DOI 10.1016/j.cub.2006.02.070
   Still IH, 1999, GENOMICS, V58, P165, DOI 10.1006/geno.1999.5829
   Takada H, 2005, DEV BIOL, V283, P253, DOI 10.1016/j.ydbio.2005.04.020
   TASSAN JP, 1993, MOL CELL BIOL, V13, P2815, DOI 10.1128/MCB.13.5.2815
   Tsai MY, 2003, NAT CELL BIOL, V5, P242, DOI 10.1038/ncb936
   Tsai MY, 2005, CURR BIOL, V15, P2156, DOI 10.1016/j.cub.2005.10.054
   Vadlamudi RK, 2000, J BIOL CHEM, V275, P36238, DOI 10.1074/jbc.M002138200
   Walczak CE, 1996, CELL, V84, P37, DOI 10.1016/S0092-8674(00)80991-5
   Walter AO, 2000, ONCOGENE, V19, P4906, DOI 10.1038/sj.onc.1203847
   Wiese C, 2001, SCIENCE, V291, P653, DOI 10.1126/science.1057661
   Wilde A, 1999, SCIENCE, V284, P1359, DOI 10.1126/science.284.5418.1359
   Yu CTR, 2005, MOL CELL BIOL, V25, P5789, DOI 10.1128/MCB.25.14.5789-5800.2005
   Zhang CM, 1999, J CELL SCI, V112, P2453
   Zhang X, 2008, MOL BIOL CELL, V19, P2752, DOI 10.1091/mbc.E08-02-0198
   Zhou HY, 1998, NAT GENET, V20, P189, DOI 10.1038/2496
NR 71
TC 1
Z9 1
U1 0
U2 0
PU UNIV BASQUE COUNTRY UPV-EHU PRESS
PI BILBAO
PA PO BOX 1397, BILBAO, BIZKAIA E-48080, SPAIN
SN 0214-6282
EI 1696-3547
J9 INT J DEV BIOL
JI Int. J. Dev. Biol.
PY 2016
VL 60
IS 7-9
BP 255
EP 261
DI 10.1387/ijdb.160189jk
PG 7
WC Developmental Biology
WE Science Citation Index Expanded (SCI-EXPANDED)
SC Developmental Biology
GA ED3BE
UT WOS:000388723500009
PM 27759154
OA Bronze
DA 2022-04-10
ER

PT J
AU Ammer, AG
   Weed, SA
AF Ammer, Amanda Gatesman
   Weed, Scott A.
TI Cortactin branches out: Roles in regulating protrusive actin dynamics
SO CELL MOTILITY AND THE CYTOSKELETON
LA English
DT Review
DE cortactin; actin; Arp2/3; N-WASp; motility
ID ALDRICH-SYNDROME PROTEIN; EXTRACELLULAR-MATRIX DEGRADATION;
   RECEPTOR-MEDIATED ENDOCYTOSIS; CLATHRIN-COATED PITS; ARP2/3 COMPLEX;
   CELL-MIGRATION; TYROSINE PHOSPHORYLATION; GROWTH-FACTOR; F-ACTIN; N-WASP
AB Since its discovery in the early 1990's, cortactin has emerged as a key signaling protein in many cellular processes, including cell adhesion, migration, endocytosis, and tumor invasion. While the list of cellular functions influenced by cortactin grows, the ability of cortactin to interact with and alter the cortical actin network is Central to its role in re-l-dating these processes. Recently, several advances have been made in our understanding of the interaction between actin and cortactin, providing insight into how these two proteins work together to provide a framework for normal and altered Cellular function. This review examines how regulation of cortactin through post-translational modification and interactions with multiple binding partners elicits changes in cortical actin cytoskeletal organization, impacting the regulation and formation of actin-rich motility structures.
C1 [Ammer, Amanda Gatesman; Weed, Scott A.] W Virginia Univ, Mary Babb Randolph Canc Ctr, Program Canc Cell Biol, Dept Anat & Neurosci, Morgantown, WV 26506 USA.
RP Weed, SA (corresponding author), W Virginia Univ, Mary Babb Randolph Canc Ctr, Program Canc Cell Biol, Dept Anat & Neurosci, Morgantown, WV 26506 USA.
EM sweed@hsc.wvu.edu
FU Weed laboratory; NATIONAL CENTER FOR RESEARCH RESOURCESUnited States
   Department of Health & Human ServicesNational Institutes of Health (NIH)
   - USANIH National Center for Research Resources (NCRR) [P20RR016440]
   Funding Source: NIH RePORTER; NATIONAL INSTITUTE OF DENTAL &CRANIOFACIAL
   RESEARCHUnited States Department of Health & Human ServicesNational
   Institutes of Health (NIH) - USANIH National Institute of Dental &
   Craniofacial Research (NIDCR) [R01DE014578] Funding Source: NIH RePORTER
FX The authors thank the members of the Weed laboratory for critical
   reading of the manuscript, Cliff Martin and Joel George for technical
   support.
CR Anton IM, 2006, EUR J CELL BIOL, V85, P295, DOI 10.1016/j.ejcb.2005.08.004
   Anton IM, 2003, J CELL SCI, V116, P2443, DOI 10.1242/jcs.00433
   Artym VV, 2006, CANCER RES, V66, P3034, DOI 10.1158/0008-5472.CAN-05-2177
   Aspenstrom P, 2004, EXP CELL RES, V298, P485, DOI 10.1016/j.yexcr.2004.04.050
   Ayala I, 2006, EUR J CELL BIOL, V85, P159, DOI 10.1016/j.ejcb.2005.09.005
   Ayala I, 2008, J CELL SCI, V121, P369, DOI 10.1242/jcs.008037
   Bailly M, 2001, CURR BIOL, V11, P620, DOI 10.1016/S0960-9822(01)00152-X
   Baldassarre M, 2003, MOL BIOL CELL, V14, P1074, DOI 10.1091/mbc.E02-05-0308
   Bamburg JR, 1999, ANNU REV CELL DEV BI, V15, P185, DOI 10.1146/annurev.cellbio.15.1.185
   Baum B, 2005, CURR BIOL, V15, pR305, DOI 10.1016/j.cub.2005.04.004
   Bellovin DI, 2005, CANCER RES, V65, P10938, DOI 10.1158/0008-5472.CAN-05-1947
   Beltzner CC, 2004, J MOL BIOL, V336, P551, DOI 10.1016/j.jmb.2003.12.017
   Birukov KG, 2002, AM J RESP CELL MOL, V26, P453, DOI 10.1165/ajrcmb.26.4.4725
   Blanchoin L, 2000, CURR BIOL, V10, P1273, DOI 10.1016/S0960-9822(00)00749-1
   Blanchoin L, 2000, NATURE, V404, P1007, DOI 10.1038/35010008
   Boguslavsky S, 2007, P NATL ACAD SCI USA, V104, P10882, DOI 10.1073/pnas.0702731104
   Bompard G, 2005, J CELL SCI, V118, P5393, DOI 10.1242/jcs.02640
   Bourguignon LYW, 2001, J BIOL CHEM, V276, P7327, DOI 10.1074/jbc.M006498200
   Bowden ET, 2006, EXP CELL RES, V312, P1240, DOI 10.1016/j.yexcr.2005.12.012
   Boyle SN, 2007, CURR BIOL, V17, P445, DOI 10.1016/j.cub.2007.01.057
   Brett TJ, 2006, NAT STRUCT MOL BIOL, V13, P121, DOI 10.1038/nsmb1043
   Bryce NS, 2005, CURR BIOL, V15, P1276, DOI 10.1016/j.cub.2005.06.043
   Buccione R, 2004, NAT REV MOL CELL BIO, V5, P647, DOI 10.1038/nrm1436
   Buday L, 2007, BBA-REV CANCER, V1775, P263, DOI 10.1016/j.bbcan.2006.12.002
   Campbell DH, 1999, CANCER RES, V59, P5376
   Cao H, 2005, NAT CELL BIOL, V7, P483, DOI 10.1038/ncb1246
   Cao H, 2003, MOL CELL BIOL, V23, P2162, DOI 10.1128/MCB.23.6.2162-2170.2003
   Carlier MF, 1999, J BIOL CHEM, V274, P33827, DOI 10.1074/jbc.274.48.33827
[truncated: 4,534,115 more chars]
