# Supplementary material for: The Global research of protein post-translational modifications in the cancer field: A bibliometric and visualized study
Source: Frontiers journal article supplement (doi:10.3389/fonc.2022.978464), 2022-11-03
Supplement: Data_Sheet_1.zip [file Editorial 5.DOC]

FN Clarivate Analytics Web of Science
VR 1.0
PT J
AU Pangou, E
   Befani, C
   Mylonis, I
   Samiotaki, M
   Panayotou, G
   Simos, G
   Liakos, P
AF Pangou, Evanthia
   Befani, Christina
   Mylonis, Ilias
   Samiotaki, Martina
   Panayotou, George
   Simos, George
   Liakos, Panagiotis
TI HIF-2 alpha phosphorylation by CK1 delta promotes erythropoietin
   secretion in liver cancer cells under hypoxia
SO JOURNAL OF CELL SCIENCE
LA English
DT Article
DE HIF-2; CK1; Phosphorylation; EPO; CRM1; Liver cancer cell
ID TERMINAL TRANSACTIVATION DOMAIN; INDUCIBLE FACTOR 1-ALPHA; CASEIN
   KINASE-I; NUCLEAR EXPORT; HEPATOCELLULAR-CARCINOMA; gene expression;
   DNA-BINDING; PAS DOMAIN; SIRTUIN 1; HIF-1-ALPHA
AB Hypoxia inducible factor 2 (HIF-2) is a transcriptional activator implicated in the cellular response to hypoxia. Regulation of its inducible subunit, HIF-2 alpha (also known as EPAS1), involves post-translational modification. Here, we demonstrate that casein kinase 1d (CK1d; also known as CSNK1D) phosphorylates HIF-2 alpha at Ser383 and Thr528 in vitro. We found that disruption of these phosphorylation sites, and silencing or chemical inhibition of CK1 delta, reduced the expression of HIF-2 target genes and the secretion of erythropoietin (EPO) in two hepatic cancer cell lines, Huh7 and HepG2, without affecting the levels of HIF-2 alpha protein expression. Furthermore, when CK1 delta-dependent phosphorylation of HIF-2 alpha was inhibited, we observed substantial cytoplasmic mislocalization of HIF-2 alpha, which was reversed upon the addition of the nuclear protein export inhibitor leptomycin B. Taken together, these data suggest that CK1 delta enhances EPO secretion from liver cancer cells under hypoxia by modifying HIF-2 alpha and promoting its nuclear accumulation. This modification represents a new mechanism of HIF-2 regulation that might allow HIF isoforms to undertake differing functions.
C1 [Pangou, Evanthia; Befani, Christina; Mylonis, Ilias; Simos, George; Liakos, Panagiotis] Univ Thessaly, Fac Med, Lab Biochem, Larisa 41500, Greece.
   [Samiotaki, Martina; Panayotou, George] Biomed Sci Res Ctr Alexander Fleming, Prot Chem Lab, Vari 16672, Greece.
RP Liakos, P (corresponding author), Univ Thessaly, Fac Med, Lab Biochem, Larisa 41500, Greece.
EM pliakos@med.uth.gr
RI Simos, George/AAH-2596-2021; Samiotaki, Martina/B-3851-2018
OI Samiotaki, Martina/0000-0001-9952-0636; Liakos,
   Panagiotis/0000-0002-3800-5056; Mylonis, Ilias/0000-0002-0893-6618;
   Simos, George/0000-0001-5453-3185; Pangou, Eva/0000-0002-1266-2699
FU Greek General Secretariat of Research and Technology in the context of
   the ARISTEIA II Action of the Operational Program Education And Lifelong
   Learning (grant HYPOXYTARGET) - European Social Fund (ESF) [3129]; Greek
   national resourcesGreek Ministry of Development-GSRT
FX This work was partially supported by the Greek General Secretariat of
   Research and Technology in the context of the ARISTEIA II Action of the
   Operational Program Education And Lifelong Learning (grant HYPOXYTARGET,
   No 3129 to G.S.) co-funded by the European Social Fund (ESF) and Greek
   national resources.
CR ANDREWS NC, 1991, NUCLEIC ACIDS RES, V19, P2499, DOI 10.1093/nar/19.9.2499
   Befani C, 2013, INT J BIOCHEM CELL B, V45, P2359, DOI 10.1016/j.biocel.2013.07.025
   Bischof J, 2011, PLOS ONE, V6, DOI 10.1371/journal.pone.0020857
   Biswas A, 2011, J BIOL CHEM, V286, P3129, DOI 10.1074/jbc.M110.188565
   Chachami G, 2005, BIOCHEM BIOPH RES CO, V331, P464, DOI 10.1016/j.bbrc.2005.03.193
   Chen R, 2012, J BIOL CHEM, V287, P30800, DOI 10.1074/jbc.M111.244780
   Cheong JK, 2011, INT J BIOCHEM CELL B, V43, P465, DOI 10.1016/j.biocel.2010.12.004
   Dioum EM, 2009, SCIENCE, V324, P1289, DOI 10.1126/science.1169956
   Eckardt KU, 2005, EUR J CLIN INVEST, V35, P13, DOI 10.1111/j.1365-2362.2005.01525.x
   Erbel PJA, 2003, P NATL ACAD SCI USA, V100, P15504, DOI 10.1073/pnas.2533374100
   Gradin K, 2002, J BIOL CHEM, V277, P23508, DOI 10.1074/jbc.M201307200
   Grangeasse C, 1999, BIOTECHNIQUES, V27, P62, DOI 10.2144/99271bm12
   Greer YE, 2011, CELL CYCLE, V10, P2605, DOI 10.4161/cc.10.16.16386
   Gross SD, 1998, CELL SIGNAL, V10, P699, DOI 10.1016/S0898-6568(98)00042-4
   Hu CJ, 2007, MOL BIOL CELL, V18, P4528, DOI 10.1091/mbc.E06-05-0419
   Ikuta T, 2004, J BIOL CHEM, V279, P19209, DOI 10.1074/jbc.M310492200
   Kaelin WG, 2008, MOL CELL, V30, P393, DOI 10.1016/j.molcel.2008.04.009
   Kalousi A, 2010, J CELL SCI, V123, P2976, DOI 10.1242/jcs.068122
   Keith B, 2012, NAT REV CANCER, V12, P9, DOI 10.1038/nrc3183
   Kietzmann T, 2016, FRONT CELL DEV BIOL, V4, DOI 10.3389/fcell.2016.00011
   Knippschild U, 2005, CELL SIGNAL, V17, P675, DOI 10.1016/j.cellsig.2004.12.011
   Knippschild U, 2014, FRONT ONCOL, V4, DOI 10.3389/fonc.2014.00096
   Koh MY, 2008, MOL CELL BIOL, V28, P7081, DOI 10.1128/MCB.00773-08
   Koh MY, 2011, CANCER RES, V71, P4015, DOI 10.1158/0008-5472.CAN-10-4142
   Kourti M, 2015, CELL SIGNAL, V27, P1129, DOI 10.1016/j.cellsig.2015.02.017
   KOURY ST, 1991, BLOOD, V77, P2497
   Lee H, 2002, MOL CELL BIOL, V22, P5835, DOI 10.1128/MCB.22.16.5835-5845.2002
   Lim JH, 2010, MOL CELL, V38, P864, DOI 10.1016/j.molcel.2010.05.023
   Lyberopoulou A, 2007, CELL PHYSIOL BIOCHEM, V20, P995, DOI 10.1159/000110460
   Maemura K, 1999, J BIOL CHEM, V274, P31565, DOI 10.1074/jbc.274.44.31565
   Majmundar AJ, 2010, MOL CELL, V40, P294, DOI 10.1016/j.molcel.2010.09.022
   Mylonis I, 2008, J BIOL CHEM, V283, P27620, DOI 10.1074/jbc.M803081200
   Mylonis I, 2006, J BIOL CHEM, V281, P33095, DOI 10.1074/jbc.M605058200
   O'Rourke JF, 1999, J BIOL CHEM, V274, P2060, DOI 10.1074/jbc.274.4.2060
   Ohh M, 2000, NAT CELL BIOL, V2, P423, DOI 10.1038/35017054
   Patel SA, 2008, CELL DEATH DIFFER, V15, P628, DOI 10.1038/cdd.2008.17
   Pawlus MR, 2012, MOL CELL BIOL, V32, P4595, DOI 10.1128/MCB.00724-12
   Rankin EB, 2007, J CLIN INVEST, V117, P1068, DOI 10.1172/JCI30117
   Rena G, 2004, EMBO REP, V5, P60, DOI 10.1038/sj.embor.7400048
   Ribatti D, 2007, HISTOPATHOLOGY, V50, P591, DOI 10.1111/j.1365-2559.2007.02654.x
   SAKISAKA S, 1993, HEPATOLOGY, V18, P1357, DOI 10.1002/hep.1840180612
   Schittek B, 2014, MOL CANCER, V13, DOI 10.1186/1476-4598-13-231
   Shevchenko A, 2006, NAT PROTOC, V1, P2856, DOI 10.1038/nprot.2006.468
   Thanos D, 1995, CELL, V83, P1091, DOI 10.1016/0092-8674(95)90136-1
   To KKW, 2006, EMBO J, V25, P4784, DOI 10.1038/sj.emboj.7601369
   Wu DL, 2015, NATURE, V524, P303, DOI 10.1038/nature14883
   Zhang YP, 2001, SCIENCE, V292, P1910, DOI 10.1126/science.1058637
   Zhao JD, 2015, CANCER TREAT REV, V41, P623, DOI 10.1016/j.ctrv.2015.05.004
NR 48
TC 21
Z9 21
U1 0
U2 3
PU COMPANY OF BIOLOGISTS LTD
PI CAMBRIDGE
PA BIDDER BUILDING CAMBRIDGE COMMERCIAL PARK COWLEY RD, CAMBRIDGE CB4 4DL,
   CAMBS, ENGLAND
SN 0021-9533
EI 1477-9137
J9 J CELL SCI
JI J. Cell Sci.
PD NOV 15
PY 2016
VL 129
IS 22
BP 4213
EP 4226
DI 10.1242/jcs.191395
PG 14
WC Cell Biology
WE Science Citation Index Expanded (SCI-EXPANDED)
SC Cell Biology
GA EE4SS
UT WOS:000389596100007
PM 27686097
DA 2022-04-10
ER

PT J
AU Brown, KK
   Hampton, MB
AF Brown, Kristin K.
   Hampton, Mark B.
TI Biological target of isothiocyanates
SO BIOCHIMICA ET BIOPHYSICA ACTA-GENERAL SUBJECTS
LA English
DT Review
DE Isothiocyanate; Electrophile; Redox signalling; Oxidative stress;
   Post-translational modification
ID MIGRATION INHIBITORY FACTOR; nf-kappa b; prostate cancer CELLS;
   CHEMOPREVENTIVE AGENT SULFORAPHANE; BETA-PHENYLETHYL ISOTHIOCYANATE;
   MITOCHONDRIAL DEATH PATHWAY; PHENETHYL ISOTHIOCYANATE; BENZYL
   ISOTHIOCYANATE; COVALENT MODIFICATION; DIETARY ISOTHIOCYANATES
AB Background: Isothiocyanates are phytochemicals with a broad array of effects in biological systems. Bioactivity includes the stimulation of cellular antioxidant systems, induction of apoptosis and interference with cytokine production and activity. Epidemiological evidence and experimental studies indicate that naturally occurring isothiocyanates and synthetic derivatives have anti-cancer and anti-inflammatory properties.
   Scope of review: This review focuses on the molecular target of isothiocyanates, and how target modification translates into a biological response.
   Major conclusions: Isothiocyanates may mediate their effects via direct protein modification or indirectly by disruption of redox homeostasis and increased thiol oxidation. Some target proteins have been identified, but in-depth searches with new techniques are needed to reveal novel target. Site-directed mutagenesis and isothiocyanate structure-activity relationships will assist in determining the biological significance of specific modifications.
   General significance: Target identification is important for rational drug design and exploiting the therapeutic potential of isothiocyanates. It also provides insight into the diverse pathway that these compounds regulate. (C) 2011 Elsevier B.V. All rights reserved.
C1 [Brown, Kristin K.; Hampton, Mark B.] Univ Otago, Dept Pathol, Free Radical Res Grp, Christchurch 8140, New Zealand.
RP Hampton, MB (corresponding author), Univ Otago, Dept Pathol, Free Radical Res Grp, POB 4345, Christchurch 8140, New Zealand.
EM mark.hampton@otago.ac.nz
RI Hampton, Mark B/A-8490-2008
OI Hampton, Mark B/0000-0002-7349-3729; BROWN, KRISTIN/0000-0002-4991-8870
FU Cancer Society; Health Research Council of New ZealandHealth Research
   Council of New Zealand
FX This work was supported by the Cancer Society and the Health Research
   Council of New Zealand. We would like to thank Dr Joel Tyndall for
   producing Fig. 4.
CR Agrawal AA, 2003, J CHEM ECOL, V29, P1403, DOI 10.1023/A:1024265420375
   Ahn YH, 2010, P NATL ACAD SCI USA, V107, P9590, DOI 10.1073/pnas.1004104107
   BAILLIE TA, 1991, ACCOUNTS CHEM RES, V24, P264, DOI 10.1021/ar00009a003
   Bautista DM, 2006, CELL, V124, P1269, DOI 10.1016/j.cell.2006.02.023
   Bednarek P, 2009, SCIENCE, V323, P101, DOI 10.1126/science.1163732
   Bond M, 1998, FEBS LETT, V435, P29, DOI 10.1016/S0014-5793(98)01034-5
   Brown KK, 2008, FREE RADICAL BIO MED, V45, P494, DOI 10.1016/j.freeradbiomed.2008.04.030
   Brown KK, 2010, FEBS LETT, V584, P1257, DOI 10.1016/j.febslet.2010.02.042
   Brown KK, 2009, J BIOL CHEM, V284, P32425, DOI 10.1074/jbc.M109.047092
   Bucala R, 2005, DRUG NEWS PERSPECT, V18, P417, DOI 10.1358/dnp.2005.18.7.939345
   Calandra T, 2003, NAT REV IMMUNOL, V3, P791, DOI 10.1038/nri1200
   Cavell BE, 2011, BIOCHEM PHARMACOL, V81, P327, DOI 10.1016/j.bcp.2010.10.005
   Clay NK, 2009, SCIENCE, V323, P95, DOI 10.1126/science.1164627
   Conaway CC, 2005, CANCER RES, V65, P8548, DOI 10.1158/0008-5472.CAN-05-0237
   Cox AG, 2008, BIOCHEM PHARMACOL, V76, P1097, DOI 10.1016/j.bcp.2008.08.021
   Cox AG, 2008, FREE RADICAL BIO MED, V44, P1001, DOI 10.1016/j.freeradbiomed.2007.11.017
   Cox AG, 2010, BIOCHEM J, V425, P313, DOI 10.1042/BJ20091541
   Cross JV, 2007, BMC CANCER, V7, DOI 10.1186/1471-2407-7-183
   Cross JV, 2009, BIOCHEM J, V423, P315, DOI 10.1042/BJ20091170
   Cross JV, 2004, BIOCHEM J, V381, P675, DOI 10.1042/BJ20040591
   Cuddihy SL, 2008, CANCER LETT, V271, P215, DOI 10.1016/j.canlet.2008.06.002
   Dickinson SE, 2009, CANCER RES, V69, P7103, DOI 10.1158/0008-5472.CAN-09-0770
   Dinkova-Kostova AT, 2002, P NATL ACAD SCI USA, V99, P11908, DOI 10.1073/pnas.172398899
   Drobnica L, 1977, CHEM CYANATES THEIR, V2
   Eggler AL, 2005, P NATL ACAD SCI USA, V102, P10070, DOI 10.1073/pnas.0502402102
   Fahey JW, 2001, PHYTOCHEMISTRY, V56, P5, DOI 10.1016/S0031-9422(00)00316-2
   Fahey JW, 2002, P NATL ACAD SCI USA, V99, P7610, DOI 10.1073/pnas.112203099
   Fimognari C, 2002, CARCINOGENESIS, V23, P581, DOI 10.1093/carcin/23.4.581
   Fimognari C, 2004, BIOCHEM PHARMACOL, V68, P1133, DOI 10.1016/j.bcp.2004.03.044
   Fimognari C, 2007, MUTAT RES-REV MUTAT, V635, P90, DOI 10.1016/j.mrrev.2006.10.004
   Getahun SM, 1999, CANCER EPIDEM BIOMAR, V8, P447
   Goosen TC, 2001, J PHARMACOL EXP THER, V296, P198
   Goosen TC, 2000, CHEM RES TOXICOL, V13, P1349, DOI 10.1021/tx000133y
   Guengerich FP, 2008, CHEM RES TOXICOL, V21, P70, DOI 10.1021/tx700079z
   Guttridge DC, 1999, MOL CELL BIOL, V19, P5785
   Halkier BA, 2006, ANNU REV PLANT BIOL, V57, P303, DOI 10.1146/annurev.arplant.57.032905.105228
   HECHT SS, 1995, CANCER EPIDEM BIOMAR, V4, P877
   Hecht SS, 1999, CANCER EPIDEM BIOMAR, V8, P907
   Hecht SS, 1996, CANCER EPIDEM BIOMAR, V5, P645
   Heiss E, 2005, ANTIOXID REDOX SIGN, V7, P1601, DOI 10.1089/ars.2005.7.1601
   Heiss E, 2001, J BIOL CHEM, V276, P32008, DOI 10.1074/jbc.M104794200
   Herr I, 2010, CANCER TREAT REV, V36, P377, DOI 10.1016/j.ctrv.2010.01.002
   Higdon JV, 2007, PHARMACOL RES, V55, P224, DOI 10.1016/j.phrs.2007.01.009
   Hinman A, 2006, P NATL ACAD SCI USA, V103, P19564, DOI 10.1073/pnas.0609598103
   Holst B, 2004, NAT PROD REP, V21, P425, DOI 10.1039/b204039p
   Hong F, 2005, CHEM RES TOXICOL, V18, P1917, DOI 10.1021/tx0502138
   Hopkins RJ, 2009, ANNU REV ENTOMOL, V54, P57, DOI 10.1146/annurev.ento.54.110807.090623
   Hu Y, 2007, BIOL CHEM, V388, P1069, DOI 10.1515/BC.2007.135
   Huang S, 2000, CANCER RES, V60, P5334
   Inyang EN, 1999, MYCOL RES, V103, P974, DOI 10.1017/S0953756298007989
   Itoh K, 1997, BIOCHEM BIOPH RES CO, V236, P313, DOI 10.1006/bbrc.1997.6943
   Iyanagi T, 2007, INT REV CYTOL, V260, P35, DOI 10.1016/S0074-7696(06)60002-8
   Jordt SE, 2004, NATURE, V427, P260, DOI 10.1038/nature02282
   Juge N, 2007, CELL MOL LIFE SCI, V64, P1105, DOI 10.1007/s00018-007-6484-5
   Kawakami M, 2005, BIOSCI BIOTECH BIOCH, V69, P2439, DOI 10.1271/bbb.69.2439
   Khor TO, 2008, MOL CARCINOGEN, V47, P321, DOI 10.1002/mc.20390
   Kleemann R, 1998, J MOL BIOL, V280, P85, DOI 10.1006/jmbi.1998.1864
   Krul C, 2002, CARCINOGENESIS, V23, P1009, DOI 10.1093/carcin/23.6.1009
   Kumar A, 2010, CHEM RES TOXICOL, V23, P756, DOI 10.1021/tx900393t
   Macpherson LJ, 2007, NATURE, V445, P541, DOI 10.1038/nature05544
   MEYER DJ, 1995, BIOCHEM J, V306, P565, DOI 10.1042/bj3060565
   Mi LX, 2008, J BIOL CHEM, V283, P22136, DOI 10.1074/jbc.M802330200
   Mi LX, 2007, CANCER RES, V67, P6409, DOI 10.1158/0008-5472.CAN-07-0340
   Mi LX, 2009, J BIOL CHEM, V284, P17039, DOI 10.1074/jbc.M901789200
   Mitchell RA, 2000, SEMIN CANCER BIOL, V10, P359, DOI 10.1006/scbi.2000.0328
   Mithen RF, 2000, J SCI FOOD AGR, V80, P967, DOI [10.1002/(SICI)1097-0010(20000515)80:7<967::AID-JSFA597>3.0.CO;2-V, 10.1002/(SICI)1097-0010(20000515)80:7&lt;967::AID-JSFA597&gt;3.0.CO;2-V]
   Miyoshi N, 2007, INT J CANCER, V120, P484, DOI 10.1002/ijc.22350
   Miyoshi N, 2008, BBA-MOL BASIS DIS, V1782, P566, DOI 10.1016/j.bbadis.2008.07.002
   Morand EF, 2006, NAT REV DRUG DISCOV, V5, P399, DOI 10.1038/nrd2029
   Moreno RL, 1999, CHEM RES TOXICOL, V12, P582, DOI 10.1021/tx9900019
   Munday R, 2008, CANCER RES, V68, P1593, DOI 10.1158/0008-5472.CAN-07-5009
   Nakajima M, 2001, DRUG METAB DISPOS, V29, P1110
   Nakamura T, 2009, CHEM RES TOXICOL, V22, P536, DOI 10.1021/tx8003906
   Nakamura Y, 2002, J BIOL CHEM, V277, P8492, DOI 10.1074/jbc.M109760200
   Newman DJ, 2007, J NAT PROD, V70, P461, DOI 10.1021/np068054v
   Nishikawa A, 1997, JPN J CANCER RES, V88, P1137, DOI 10.1111/j.1349-7006.1997.tb00341.x
   Ouertatani-Sakouhi H, 2009, BIOCHEMISTRY-US, V48, P9858, DOI 10.1021/bi900957e
   Pappa G, 2006, MUTAT RES-FUND MOL M, V599, P76, DOI 10.1016/j.mrfmmm.2006.01.007
   PODHRADSKY D, 1979, EXPERIENTIA, V35, P154, DOI 10.1007/BF01920581
   Prawan A, 2009, CHEM-BIOL INTERACT, V179, P202, DOI 10.1016/j.cbi.2008.12.014
   Rachakonda G, 2008, CHEM RES TOXICOL, V21, P705, DOI 10.1021/tx700302s
   Rask L, 2000, PLANT MOL BIOL, V42, P93, DOI 10.1023/A:1006380021658
   Rose P, 2005, INT J BIOCHEM CELL B, V37, P100, DOI 10.1016/j.biocel.2004.05.018
   Satyan KS, 2006, GYNECOL ONCOL, V103, P261, DOI 10.1016/j.ygyno.2006.03.002
   Schafer FQ, 2001, FREE RADICAL BIO MED, V30, P1191, DOI 10.1016/S0891-5849(01)00480-4
   Singh SV, 2005, J BIOL CHEM, V280, P19911, DOI 10.1074/jbc.M412443200
   SMITH TJ, 1993, CANCER RES, V53, P3276
   Srivastava SK, 2004, CARCINOGENESIS, V25, P1701, DOI 10.1093/carcin/bgh179
   Swope M, 1998, EMBO J, V17, P3534, DOI 10.1093/emboj/17.13.3534
   Tang L, 2005, MOL CANCER THER, V4, P1250, DOI 10.1158/1535-7163.MCT-05-0041
   Thimmulappa RK, 2002, CANCER RES, V62, P5196
   Thomson SJ, 2006, CANCER RES, V66, P6772, DOI 10.1158/0008-5472.CAN-05-3809
   TOLEDANO MB, 1991, P NATL ACAD SCI USA, V88, P4328, DOI 10.1073/pnas.88.10.4328
   Trachootham D, 2008, BLOOD, V112, P1912, DOI 10.1182/blood-2008-04-149815
   Trachootham D, 2006, CANCER CELL, V10, P241, DOI 10.1016/j.ccr.2006.08.009
   Verhoeven DTH, 1996, CANCER EPIDEM BIOMAR, V5, P733
   Walters DG, 2004, CARCINOGENESIS, V25, P1659, DOI 10.1093/carcin/bgh164
   Wang XT, 2011, J MED CHEM, V54, P809, DOI 10.1021/jm101199t
   Winterbourn CC, 2008, FREE RADICAL BIO MED, V45, P549, DOI 10.1016/j.freeradbiomed.2008.05.004
   Xiao D, 2008, J BIOL CHEM, V283, P30151, DOI 10.1074/jbc.M802529200
   Xiao D, 2006, CARCINOGENESIS, V27, P2223, DOI 10.1093/carcin/bgl087
   Xiao D, 2010, J BIOL CHEM, V285, P26558, DOI 10.1074/jbc.M109.063255
   Xu CJ, 2005, ONCOGENE, V24, P4486, DOI 10.1038/sj.onc.1208656
   Yang YM, 2005, CANCER RES, V65, P8538, DOI 10.1158/0008-5472.CAN-05-0236
   Yeh CT, 2005, CARCINOGENESIS, V26, P2138, DOI 10.1093/carcin/bgi185
   Youn HS, 2010, J IMMUNOL, V184, P411, DOI 10.4049/jimmunol.0803988
   Yu R, 1998, CANCER RES, V58, P402
   Zhang DD, 2003, MOL CELL BIOL, V23, P8137, DOI 10.1128/MCB.23.22.8137-8151.2003
   Zhang YS, 2004, MUTAT RES-FUND MOL M, V555, P173, DOI 10.1016/j.mrfmmm.2004.04.017
   Zhang YS, 2003, MOL CANCER THER, V2, P1045
   ZHANG YS, 1995, BIOCHEM BIOPH RES CO, V206, P748, DOI 10.1006/bbrc.1995.1106
   Zhang YS, 2000, CARCINOGENESIS, V21, P1175, DOI 10.1093/carcin/21.6.1175
NR 112
TC 87
Z9 88
U1 2
U2 43
PU ELSEVIER SCIENCE BV
PI AMSTERDAM
PA PO BOX 211, 1000 AE AMSTERDAM, NETHERLANDS
SN 0304-4165
J9 BBA-GEN SUBJECTS
JI Biochim. Biophys. Acta-Gen. Subj.
PD SEP
PY 2011
VL 1810
IS 9
BP 888
EP 894
DI 10.1016/j.bbagen.2011.06.004
PG 7
WC Biochemistry & Molecular Biology; Biophysics
WE Science Citation Index Expanded (SCI-EXPANDED)
SC Biochemistry & Molecular Biology; Biophysics
GA 807VZ
UT WOS:000293932400011
PM 21704127
DA 2022-04-10
ER

PT J
AU Vinciguerra, GLR
   Citron, F
   Segatto, I
   Belletti, B
   Vecchione, A
   Baldassarre, G
AF Vinciguerra, Gian Luca Rampioni
   Citron, Francesca
   Segatto, Ilenia
   Belletti, Barbara
   Vecchione, Andrea
   Baldassarre, Gustavo
TI p27kip1 at the crossroad between actin and microtubule dynamics
SO CELL DIVISION
LA English
DT Article
DE p27; Microtubule; Actin; Cytoskeleton; Stathmin; Migration; Cancer
ID CELL-MIGRATION; NEURONAL DIFFERENTIATION; POTENTIAL TARGET; CDK
   INHIBITOR; P27(KIP1); PROTEIN; P27; PROMOTES; RHOA; CYTOSKELETON
AB The p27(kip1) protein, mainly known as a negative regulator of cell proliferation, has also been involved in the control of other cellular processes, including the regulation of cytoskeleton dynamics. Notably, these two functions involve distinct protein domains, residing in the N- and C-terminal halves, respectively. In the last two decades, p27(kip1) has been reported to interact with microtubule and acto-myosin cytoskeletons, both in direct and indirect ways, overall drawing a picture in which several factors play their role either in synergy or in contrast one with another. As a result, the role of p27(kip1) in cytoskeleton dynamics has been implicated in cell migration, both in physiologic and in neoplastic contexts, modulating cytokinesis, lipid raft trafficking, and neuronal development. Recently, two distinct papers have further reported a central role for p27(kip1) in the control of microtubule stability and post-translational modification, dissecting the interaction between p27(kip1) and -tubulin-acetyl-transferase (-TAT), an enzyme involved in the stability of microtubules, and protein-regulator of cytokinesis 1 (PRC1), a nuclear regulator of the central spindle during mitosis. In light of these recent evidences, we will comment on the role of p27(kip1) on cytoskeleton regulation and its implication for cancer progression.
C1 [Vinciguerra, Gian Luca Rampioni; Citron, Francesca; Segatto, Ilenia; Belletti, Barbara; Baldassarre, Gustavo] IRCCS, Natl Canc Inst, Div Mol Oncol, Ctr Riferimento Oncol Aviano CRO, I-33081 Aviano, Italy.
   [Vinciguerra, Gian Luca Rampioni; Vecchione, Andrea] Univ Rome Sapienza, Santo Andrea Hosp, Fac Med & Psychol, Dept Clin & Mol Med, I-00189 Rome, Italy.
RP Baldassarre, G (corresponding author), IRCCS, Natl Canc Inst, Div Mol Oncol, Ctr Riferimento Oncol Aviano CRO, I-33081 Aviano, Italy.
EM gbaldassarre@cro.it
RI Rampioni Vinciguerra, Gian Luca/AFS-2233-2022; Segatto,
   Ilenia/AAX-5513-2020; Baldassarre, Gustavo/K-1350-2016; Citron,
   Francesca/AAC-2249-2020; Belletti, Barbara/J-2028-2018
OI Segatto, Ilenia/0000-0001-5282-1028; Baldassarre,
   Gustavo/0000-0002-9750-8825; Citron, Francesca/0000-0002-5896-3008;
   Belletti, Barbara/0000-0003-2249-0285
FU Associazione Italiana Ricerca sul Cancro (AIRC)Fondazione AIRC per la
   ricerca sul cancro [16865]; AIRC/FIRC fellowshipFondazione AIRC per la
   ricerca sul cancro [20902]
FX This work was supported by grant from Associazione Italiana Ricerca sul
   Cancro (AIRC) (IG #16865) to GB; FC was supported by AIRC/FIRC
   fellowship (#20902).
CR Babu MM, 2016, BIOCHEM SOC T, V44, P1185, DOI 10.1042/BST20160172
   Baldassarre G, 2005, CANCER CELL, V7, P51, DOI 10.1016/j.ccr.2004.11.025
   Baldassarre G, 2000, CELL GROWTH DIFFER, V11, P517
   Baldassarre G, 1999, J CLIN INVEST, V104, P865, DOI 10.1172/JCI6443
   Belletti B, 2005, CURR MED CHEM, V12, P1589, DOI 10.2174/0929867054367149
   Belletti B, 2008, MOL BIOL CELL, V19, P2003, DOI 10.1091/mbc.E07-09-0894
   Belletti B, 2011, EXPERT OPIN THER TAR, V15, P1249, DOI 10.1517/14728222.2011.620951
   Belletti B, 2010, MOL CELL BIOL, V30, P2229, DOI 10.1128/MCB.00723-09
   Berton S, 2009, MOL CELL BIOL, V29, P5031, DOI 10.1128/MCB.00144-09
   Besson A, 2004, GENE DEV, V18, P862, DOI 10.1101/gad.1185504
   Besson A, 2004, NAT REV CANCER, V4, P948, DOI 10.1038/nrc1501
   Besson A, 2007, GENE DEV, V21, P1731, DOI 10.1101/gad.1556607
   Cusan M, 2018, FRONT ENDOCRINOL, V9, DOI 10.3389/fendo.2018.00393
   Das RK, 2016, P NATL ACAD SCI USA, V113, P5616, DOI 10.1073/pnas.1516277113
   De Marco C, 2019, MOL CANCER THER, V18, P482, DOI 10.1158/1535-7163.MCT-18-0134
   Fabris L, 2015, P NATL ACAD SCI USA, V112, P13916, DOI 10.1073/pnas.1508514112
   Fero ML, 1998, NATURE, V396, P177, DOI 10.1038/24179
   Godin JD, 2012, DEV CELL, V23, P729, DOI 10.1016/j.devcel.2012.08.006
   Goto T, 2004, DEV NEUROSCI-BASEL, V26, P208, DOI 10.1159/000082138
   Horster H, 2017, STEM CELLS, V35, P787, DOI 10.1002/stem.2536
   Kawauchi T, 2006, NAT CELL BIOL, V8, P17, DOI 10.1038/ncb1338
   Lacy ER, 2004, NAT STRUCT MOL BIOL, V11, P358, DOI 10.1038/nsmb746
   Larreaa MD, 2009, P NATL ACAD SCI USA, V106, P9268, DOI 10.1073/pnas.0805057106
   Lee S, 2004, J BIOL CHEM, V279, P1885, DOI 10.1074/jbc.M306968200
   McAllister SS, 2003, MOL CELL BIOL, V23, P216, DOI 10.1128/MCB.23.1.216-228.2003
   Morelli G, 2018, CELL REP, V23, P2429, DOI 10.1016/j.celrep.2018.04.083
   Nagahara H, 1998, NAT MED, V4, P1449, DOI 10.1038/4042
   Nguyen L, 2006, GENE DEV, V20, P1511, DOI 10.1101/gad.377106
   Ohnuma S, 1999, CELL, V99, P499, DOI 10.1016/S0092-8674(00)81538-X
   Pellizzari I, 2016, ONCOTARGET, V7, P64560, DOI 10.18632/oncotarget.11656
   Perchey RT, 2018, BBA-MOL CELL RES, V1865, P1630, DOI 10.1016/j.bbamcr.2018.08.010
   Phillips AH, 2018, J MOL BIOL, V430, P751, DOI 10.1016/j.jmb.2018.01.017
   Schiappacassi M, 2008, MOL CANCER THER, V7, P1164, DOI 10.1158/1535-7163.MCT-07-2154
   Schiappacassi M, 2011, PLOS ONE, V6, DOI 10.1371/journal.pone.0017673
   Serres MP, 2012, J CLIN INVEST, V122, P844, DOI 10.1172/JCI60376
   Sharma SS, 2016, CELL CYCLE, V15, P1189, DOI 10.1080/15384101.2016.1157238
   Tanaka H, 2002, J CELL BIOL, V158, P321, DOI 10.1083/jcb.200202071
   Vlachos P, 2009, ONCOGENE, V28, P4175, DOI 10.1038/onc.2009.269
   Wu FY, 2006, CANCER RES, V66, P2162, DOI 10.1158/0008-5472.CAN-05-3304
   Zindy F, 1999, P NATL ACAD SCI USA, V96, P13462, DOI 10.1073/pnas.96.23.13462
NR 40
TC 9
Z9 9
U1 0
U2 1
PU BMC
PI LONDON
PA CAMPUS, 4 CRINAN ST, LONDON N1 9XW, ENGLAND
SN 1747-1028
J9 CELL DIV
JI Cell Div.
PD APR 1
PY 2019
VL 14
AR 2
DI 10.1186/s13008-019-0045-9
PG 7
WC Cell Biology
WE Science Citation Index Expanded (SCI-EXPANDED)
SC Cell Biology
GA HR3WZ
UT WOS:000463074300001
PM 30976290
OA Green Published, gold
DA 2022-04-10
ER

PT J
AU Syed, N
   Ilyas, A
   Idrees, F
   Zarina, S
   Hashim, Z
AF Syed, Nida
   Ilyas, Amber
   Idrees, Farha
   Zarina, Shamshad
   Hashim, Zehra
TI Inhibition of USP2 Induces Apoptosis through Down Regulation of Fatty
   Acid Synthase and Cyclin D1 in Triple Negative Breast Cancer
SO CURRENT PROTEOMICS
LA English
DT Article
DE ML364; USP2; FAS; Cyclin D1; triple negative breast cancer;
   protein-protein interaction; apoptosis
ID UBIQUITIN; EXPRESSION; STABILITY; PATHWAY; ARREST; WOMEN
AB Background: Breast cancer is the most occurring cancer in women with high incidence rates both in developed and developing countries. Among different types of breast cancers, Triple Negative Breast Cancer (TNBC) is the most aggressive type as it lacks receptors of Estrogen, Progesterone and Human Epidermal Growth Factor Receptor 2, common diagnostic biomarkerss for the disease. Since early detection of TNBC can save thousands of lives, there is a dire need to discover and develop effective and affordable methods for early detection. Different Post Translational Modifications (PTMs) have been proposed as potential biomarkers for various clinical conditions. Ubiquitination is a type of PTM involved in the stability and regulation of cellular proteins.
   Objective: It is hypothesized that reticence of ubiquitination may lead to cell death. Current study focuses on the inhibition of ubiquitinationSpecific Protease (USP), USP2 using its inhibitor, ML364 in HTB132 triple negative breast cancer cell line to induce cell death. The aim of the current study was to evaluate anticancer property of ML364 that might be a promising novel therapeutic agent for TNBC. Furthermore, current investigations focus on USP2 and their focal stabilizing substrates i.e. Fatty acid Synthase (FAS) and Cyclin D1 could be potential prognostic markers for the disease.
   Methods: Quantitative PCR of Cyclin D1, USP2, MDM2, and Fatty Acid Synthase (FAS) was performed to identify the deubiquitination effect of ML364 in breast cancer cells, which complemented our results with studies on normal and breast cancerous tissue samples.
   Results: Expression of USP2 and its substrates Cyclin D1 and FAS was found to be down regulated in ML364 treated breast cancer cell line whereas higher expression was observed in breast cancer tissue, indicating therapeutic potential of USP2 inhibitor.
   Conclusion: Our findings suggest that USP2, Cyclin D1 and FAS could be used as prognostic marker and therapeutic target for TNBC.
C1 [Syed, Nida; Ilyas, Amber; Zarina, Shamshad; Hashim, Zehra] Univ Karachi, Natl Ctr Prote, Karachi 75270, Pakistan.
   [Idrees, Farha] DUHS, Karachi, Pakistan.
   [Idrees, Farha] Ruth Pfau Civil Hosp, Karachi, Pakistan.
RP Hashim, Z (corresponding author), Univ Karachi, Natl Ctr Prote, Karachi 75270, Pakistan.
EM zehra.manzoor@uok.edu.pk
RI Zarina, Shamshad/E-7382-2010
OI Zarina, Shamshad/0000-0003-0781-7171
FU Higher Education Commission, Islamabad, PakistanHigher Education
   Commission of Pakistan [20-2827]
FX This study was supported by a research grant (NRPU#20-2827) from the
   Higher Education Commission, Islamabad, Pakistan.
CR Alao JP, 2007, MOL CANCER, V6, DOI 10.1186/1476-4598-6-24
   Amerik AY, 2004, BBA-MOL CELL RES, V1695, P189, DOI 10.1016/j.bbamcr.2004.10.003
   Assi HA, 2013, J THORAC DIS, V5, pS2, DOI 10.3978/j.issn.2072-1439.2013.05.24
   Aysola K, 2013, HERED GENET, V2013, DOI [10.4172/2161-1041.S2-001, DOI 10.4172/2161-1041.S2-001, 10.4172/2161-1041.s2-001]
   Berg WA, 2012, JAMA-J AM MED ASSOC, V307, P1394, DOI 10.1001/jama.2012.388
   Carey LA, 2007, CLIN CANCER RES, V13, P2329, DOI 10.1158/1078-0432.CCR-06-1109
   Claudino WM, 2007, J CLIN ONCOL, V25, P2840, DOI 10.1200/JCO.2006.09.7550
   Davis MI, 2016, J BIOL CHEM, V291, P24628, DOI 10.1074/jbc.M116.738567
   Davis Mindy I, 2015, Drug Target Rev, V2, P60
   Deshaies RJ, 2009, ANNU REV BIOCHEM, V78, P399, DOI 10.1146/annurev.biochem.78.101807.093809
   Dikic I, 2009, NAT REV MOL CELL BIO, V10, P659, DOI 10.1038/nrm2767
   Gewies A, 2003, CANCER RES, V63, P682
   Graner E, 2004, CANCER CELL, V5, P253, DOI 10.1016/S1535-6108(04)00055-8
   He JB, 2019, CELL DEATH DIS, V10, DOI 10.1038/s41419-019-1512-6
   Hershko A, 1998, ANNU REV BIOCHEM, V67, P425, DOI 10.1146/annurev.biochem.67.1.425
   Ilie SM, 2018, BREAST CANCER-TARGET, V10, P177, DOI 10.2147/BCTT.S175556
   Kabel AM., 2017, J ONCOL SCI, V3, P5, DOI [10.1016/j.jons.2017.01.001, DOI 10.1016/J.JONS.2017.01.001]
   Khokhar A, 2012, ASIAN PAC J CANCER P, V13, P4861, DOI 10.7314/APJCP.2012.13.10.4861
   Kim J, 2012, CELL CYCLE, V11, P1123, DOI 10.4161/cc.11.6.19550
   Komander D, 2012, ANNU REV BIOCHEM, V81, P203, DOI 10.1146/annurev-biochem-060310-170328
   Lin DI, 2006, MOL CELL, V24, P355, DOI 10.1016/j.molcel.2006.09.007
   Lin NU, 2012, CANCER-AM CANCER SOC, V118, P5463, DOI 10.1002/cncr.27581
   Liu Hailan, 2010, Int J Biochem Mol Biol, V1, P69
   Magiera K, 2017, CELL CHEM BIOL, V24, P458, DOI 10.1016/j.chembiol.2017.03.002
   Murawa P, 2014, REP PRACT ONCOL RADI, V19, P165, DOI 10.1016/j.rpor.2013.12.003
   Nijman SMB, 2005, CELL, V123, P773, DOI 10.1016/j.cell.2005.11.007
   Nogueira-Ferreira R, 2013, ARCH BIOCHEM BIOPHYS, V538, P64, DOI 10.1016/j.abb.2013.07.027
   Pan YB, 2017, PLOS ONE, V12, DOI 10.1371/journal.pone.0172324
   Qu Q, 2015, TUMOR BIOL, V36, P5415, DOI 10.1007/s13277-015-3207-7
   Sauter ER, 2017, EUR J BREAST HEALTH, V13, P162, DOI 10.5152/ejbh.2017.3635
   Sever R, 2015, CSH PERSPECT MED, V5, DOI 10.1101/cshperspect.a006098
   Shan J, 2009, MOL CELL, V36, P469, DOI 10.1016/j.molcel.2009.10.018
   Shi Y, 2011, J BIOL CHEM, V286, P38960, DOI 10.1074/jbc.M111.231498
   Singhal S, 2008, BMC BIOCHEM, V9, DOI 10.1186/1471-2091-9-S1-S3
   Stevenson LF, 2007, EMBO J, V26, P976, DOI 10.1038/sj.emboj.7601567
   Wang CL, 2014, CARCINOGENESIS, V35, P1500, DOI 10.1093/carcin/bgu015
   Wang Y, 2001, CANCER LETT, V167, P99, DOI 10.1016/S0304-3835(01)00464-5
   Wei CY, 2015, INT J CLIN EXP PATHO, V8, P14619
   Wilkinson KD, 1997, FASEB J, V11, P1245, DOI 10.1096/fasebj.11.14.9409543
   Zamaraev AV, 2017, TRENDS CELL BIOL, V27, P322, DOI 10.1016/j.tcb.2017.01.003
   Zhao Y, 2018, CELL REP, V22, P2442, DOI 10.1016/j.celrep.2018.02.007
NR 41
TC 1
Z9 1
U1 5
U2 6
PU BENTHAM SCIENCE PUBL LTD
PI SHARJAH
PA EXECUTIVE STE Y-2, PO BOX 7917, SAIF ZONE, 1200 BR SHARJAH, U ARAB
   EMIRATES
SN 1570-1646
EI 1875-6247
J9 CURR PROTEOMICS
JI Curr. Proteomics
PY 2020
VL 17
IS 5
BP 425
EP 432
DI 10.2174/1570164617666191008093522
PG 8
WC Biochemical Research Methods; Biochemistry & Molecular Biology
WE Science Citation Index Expanded (SCI-EXPANDED)
SC Biochemistry & Molecular Biology
GA MO4RT
UT WOS:000551516000007
DA 2022-04-10
ER

PT J
AU Stachelscheid, J
   Jiang, Q
   Herling, M
AF Stachelscheid, Johanna
   Jiang, Qu
   Herling, Marco
TI The Modes of Dysregulation of the Proto-Oncogene T-Cell
   Leukemia/Lymphoma 1A
SO CANCERS
LA English
DT Review
DE TCL1 oncogenes; kinase signaling; lymphoma; T-PLL; CLL; BPDCN
ID EPSTEIN-BARR-VIRUS; CHRONIC LYMPHOCYTIC-LEUKEMIA; TCL1 EXPRESSION;
   GERMINAL CENTER; SELF-RENEWAL; PROLYMPHOCYTIC LEUKEMIA; ONCOGENE
   EXPRESSION; TRANSGENIC MICE; PROTEIN; MOUSE
AB Simple Summary
   T-cell leukemia/lymphoma 1A (TCL1A) is a proto-oncogene that is mainly expressed in embryonic and fetal tissues, as well as in some lymphatic cells. It is frequently overexpressed in a variety of T- and B-cell lymphomas and in some solid tumors. In chronic lymphocytic leukemia and in T-prolymphocytic leukemia, TCL1A has been implicated in the pathogenesis of these conditions, and high-level TCL1A expression correlates with more aggressive disease characteristics and poorer patient survival. Despite the modes of TCL1A (dys)regulation still being incompletely understood, there are recent advances in understanding its (post)transcriptional regulation. This review summarizes the current concepts of TCL1A's multi-faceted modes of regulation. Understanding how TCL1A is deregulated and how this can lead to tumor initiation and sustenance can help in future approaches to interfere in its oncogenic actions.
   Incomplete biological concepts in lymphoid neoplasms still dictate to a large extent the limited availability of efficient targeted treatments, which entertains the mostly unsatisfactory clinical outcomes. Aberrant expression of the embryonal and lymphatic TCL1 family of oncogenes, i.e., the paradigmatic TCL1A, but also TML1 or MTCP1, is causally implicated in T- and B-lymphocyte transformation. TCL1A also carries prognostic information in these particular T-cell and B-cell tumors. More recently, the TCL1A oncogene has been observed also in epithelial tumors as part of oncofetal stemness signatures. Although the concepts on the modes of TCL1A dysregulation in lymphatic neoplasms and solid tumors are still incomplete, there are recent advances in defining the mechanism of its (de)regulation. This review presents a comprehensive overview of TCL1A expression in tumors and the current understanding of its (dys)regulation via genomic aberrations, epigenetic modifications, or deregulation of TCL1A-targeting micro RNAs. We also summarize triggers that act through such transcriptional and translational regulation, i.e., altered signals by the tumor microenvironment. A refined mechanistic understanding of these modes of dysregulations together with improved concepts of TCL1A-associated malignant transformation can benefit future approaches to specifically interfere in TCL1A-initiated or -driven tumorigenesis.
C1 [Stachelscheid, Johanna; Jiang, Qu; Herling, Marco] Univ Cologne, Ctr Mol Med Cologne CMMC, Aachen Bonn Cologne Duesseldorf Excellence Clust, Dept Internal Med 1, D-50931 Cologne, Germany.
   [Herling, Marco] Univ Leipzig, Dept Hematol Cellular Therapy & Hemostaseol, D-04103 Leipzig, Germany.
RP Herling, M (corresponding author), Univ Cologne, Ctr Mol Med Cologne CMMC, Aachen Bonn Cologne Duesseldorf Excellence Clust, Dept Internal Med 1, D-50931 Cologne, Germany.; Herling, M (corresponding author), Univ Leipzig, Dept Hematol Cellular Therapy & Hemostaseol, D-04103 Leipzig, Germany.
EM johanna.stachelscheid@uk-koeln.de; qu.jiang@uk-koeln.de;
   marco.herling@medizin.uni-leipzig.de
OI Stachelscheid, Johanna/0000-0001-7419-8900; JIANG,
   QU/0000-0001-8517-7750
FU German Cancer AidDeutsche Krebshilfe [70112788]; China Scholarship
   Council (CSC)China Scholarship Council [[2017]3109]
FX M. Herling received funding from German Cancer Aid (70112788). Q. Jiang
   was funded by a scholarship of the China Scholarship Council (CSC,
   [2017]3109).
CR Aggarwal M, 2009, MODERN PATHOL, V22, P206, DOI 10.1038/modpathol.2008.148
   Amini S, 2014, ANAT CELL BIOL, V47, P1, DOI 10.5115/acb.2014.47.1.1
   Anastasiadou E, 2010, ONCOGENE, V29, P1316, DOI 10.1038/onc.2009.439
   Anastasiadou E, 2009, CANCER LETT, V284, P165, DOI 10.1016/j.canlet.2009.04.025
   Auguin D, 2004, J BIOL CHEM, V279, P35890, DOI 10.1074/jbc.M400364200
   Babushok DV, 2018, LEUKEMIA, V32, P2720, DOI 10.1038/s41375-018-0231-9
   Bajaj Bharat G, 2007, Cancer Treat Res, V133, P141
   Balatti V, 2015, P NATL ACAD SCI USA, V112, P2169, DOI 10.1073/pnas.1500010112
   Bell A, 2003, TRENDS MICROBIOL, V11, P495, DOI 10.1016/j.tim.2003.09.009
   Bichi R, 2002, P NATL ACAD SCI USA, V99, P6955, DOI 10.1073/pnas.102181599
   Boccellato F, 2007, J VIROL, V81, P2274, DOI 10.1128/JVI.01822-06
   Bresin A, 2016, CELL DEATH DIS, V7, DOI 10.1038/cddis.2015.419
   Bresin A, 2018, PLOS ONE, V13, DOI 10.1371/journal.pone.0204775
   Brinas F, 2021, CELLS-BASEL, V10, DOI 10.3390/cells10061367
   Cao DF, 2010, HISTOPATHOLOGY, V57, P152, DOI 10.1111/j.1365-2559.2010.03583.x
   Cardinaud B, 2009, LEUKEMIA, V23, P2174, DOI 10.1038/leu.2009.125
   Ceribelli M, 2016, CANCER CELL, V30, P764, DOI 10.1016/j.ccell.2016.10.002
   Cohen JI, 2008, LEUKEMIA LYMPHOMA, V49, P27, DOI 10.1080/10428190802311417
   Diwan AH, 2005, AM J CLIN PATHOL, V123, P510, DOI 10.1309/YB79JG4TMJERQ7PV
   Doerr JR, 2005, J MOL BIOL, V350, P631, DOI 10.1016/j.jmb.2005.05.032
   Efanov A, 2010, LEUKEMIA, V24, P970, DOI 10.1038/leu.2010.46
   Ema M, 2008, CELL STEM CELL, V3, P555, DOI 10.1016/j.stem.2008.09.003
   Fedorchenko O, 2013, BLOOD, V121, P4126, DOI 10.1182/blood-2012-11-466250
   Fink SR, 2005, LEUKEMIA RES, V29, P253, DOI 10.1016/j.leukres.2004.07.012
   French SW, 2007, CANCER LETT, V248, P198, DOI 10.1016/j.canlet.2006.07.006
   French SW, 2003, J BIOL CHEM, V278, P948, DOI 10.1074/jbc.M207166200
   Frezzato F, 2019, INT J CANCER, V145, P3089, DOI 10.1002/ijc.32383
   Fu ZQ, 1998, P NATL ACAD SCI USA, V95, P3413, DOI 10.1073/pnas.95.7.3413
   Gao HX, 2020, PATHOL RES PRACT, V216, DOI 10.1016/j.prp.2019.152799
   Gaudio E, 2013, BLOOD, V121, P351, DOI 10.1182/blood-2012-09-457374
   Gaudio E, 2012, BLOOD, V119, P180, DOI 10.1182/blood-2011-08-374561
   Ghosh HS, 2010, IMMUNITY, V33, P905, DOI 10.1016/j.immuni.2010.11.023
   Gritti C, 1998, BLOOD, V92, P368, DOI 10.1182/blood.V92.2.368.414k39_368_373
   Gualco G, 2009, AM J SURG PATHOL, V33, P1815, DOI 10.1097/PAS.0b013e3181bb9a18
   Hering M, 2003, BLOOD, V101, P5007, DOI 10.1182/blood-2002-10-3297
   Herling M, 2004, BLOOD, V104, P328, DOI 10.1182/blood-2004-01-0002
   Herling M, 2006, LEUKEMIA, V20, P280, DOI 10.1038/sj.leu.2404017
   Herling M, 2008, BLOOD, V111, P328, DOI 10.1182/blood-2007-07-101519
   Herling M, 2007, J AM ACAD DERMATOL, V57, P533, DOI 10.1016/j.jaad.2007.02.034
   Herling M, 2007, AM J SURG PATHOL, V31, P1123, DOI 10.1097/PAS.0b013e31802e2201
   Herling M, 2009, BLOOD, V114, P4675, DOI 10.1182/blood-2009-03-208256
   Hertz DL, 2021, FRONT GENET, V12, DOI 10.3389/fgene.2021.662734
   Hiromura M, 2006, J BIOL CHEM, V281, P27753, DOI 10.1074/jbc.M602420200
   Holler C, 2009, BLOOD, V113, P2791, DOI 10.1182/blood-2008-06-160713
   Hong XH, 2014, GUT, V63, P1635, DOI 10.1136/gutjnl-2013-305302
   Hoyer KK, 2005, J IMMUNOL, V175, P864, DOI 10.4049/jimmunol.175.2.864
   Hoyer KK, 2002, P NATL ACAD SCI USA, V99, P14392, DOI 10.1073/pnas.212410199
   Ingle JN, 2010, J CLIN ONCOL, V28, P4674, DOI 10.1200/JCO.2010.28.5064
   Ivanova N, 2006, NATURE, V442, P533, DOI 10.1038/nature04915
   Jiang JM, 2008, NAT CELL BIOL, V10, P353, DOI 10.1038/ncb1698
   Kang SM, 2005, BLOOD, V105, P1288, DOI 10.1182/blood-2004-04-1453
   Kiss C, 2003, P NATL ACAD SCI USA, V100, P4813, DOI 10.1073/pnas.0730710100
   Knittel G, 2017, NAT COMMUN, V8, DOI 10.1038/s41467-017-00210-6
   Kohlhaas Vivien, 2021, Blood, V137, P646, DOI 10.1182/blood.2020005734
   Kunstle G, 2002, MOL CELL BIOL, V22, P1513, DOI 10.1128/MCB.22.5.1513-1525.2002
   Kuraishy AI, 2007, P NATL ACAD SCI USA, V104, P10175, DOI 10.1073/pnas.0704170104
   Laine J, 2000, MOL CELL, V6, P395, DOI 10.1016/S1097-2765(00)00039-3
   Lau SK, 2010, AM J CLIN PATHOL, V133, P762, DOI 10.1309/AJCPIPU1MPTBM2FQ
   Lee S, 2009, J VIROL, V83, P12368, DOI 10.1128/JVI.01403-09
   Lemal R, 2016, MODERN PATHOL, V29, P83, DOI 10.1038/modpathol.2015.122
   Lewis R, 2021, LEUKEMIA, V35, P2895, DOI 10.1038/s41375-021-01376-1
   Li H, 2017, BIOMED PHARMACOTHER, V88, P924, DOI 10.1016/j.biopha.2017.01.128
   Liu MH, 2012, BREAST CANCER RES, V14, DOI 10.1186/bcr3137
   Lock RB, 2003, INT J BIOCHEM CELL B, V35, P1614, DOI 10.1016/S1357-2725(03)00146-8
   Mancao C, 2007, BLOOD, V110, P3715, DOI 10.1182/blood-2007-05-090142
   Matoba R, 2006, PLOS ONE, V1, DOI 10.1371/journal.pone.0000026
   Motiwala T, 2011, BLOOD, V118, P6132, DOI 10.1182/blood-2011-01-323147
   Nakayama I, 2000, PATHOL INT, V50, P191, DOI 10.1046/j.1440-1827.2000.01023.x
   Narducci MG, 2002, P NATL ACAD SCI USA, V99, P11712, DOI 10.1073/pnas.182412399
   Narducci MG, 1997, ONCOGENE, V15, P919, DOI 10.1038/sj.onc.1201246
   Narducci MG, 2000, CANCER RES, V60, P2095
   Nishimura K, 2017, STEM CELL REP, V8, P787, DOI 10.1016/j.stemcr.2017.01.026
   Noguchi M, 2007, FASEB J, V21, P2273, DOI 10.1096/fj.06-7684com
   Noh KH, 2012, J CLIN INVEST, V122, P4077, DOI 10.1172/JCI64057
   Oberbeck S, 2020, BLOOD, V136, P2786, DOI 10.1182/blood.2019003348
   Pagano L, 2016, BRIT J HAEMATOL, V174, P188, DOI 10.1111/bjh.14146
   Palamarchuk A, 2012, P NATL ACAD SCI USA, V109, P2555, DOI 10.1073/pnas.1200003109
   Patil P, 2020, GENE CHROMOSOME CANC, V59, P261, DOI 10.1002/gcc.22821
   Pekarsky Y, 2000, P NATL ACAD SCI USA, V97, P3028, DOI 10.1073/pnas.040557697
   Pekarsky Y, 1999, P NATL ACAD SCI USA, V96, P2949, DOI 10.1073/pnas.96.6.2949
   Pekarsky Y, 2006, CANCER RES, V66, P11590, DOI 10.1158/0008-5472.CAN-06-3613
   Pekarsky Y, 2010, SEMIN CANCER BIOL, V20, P370, DOI 10.1016/j.semcancer.2010.09.003
   Pekarsky Y, 2008, P NATL ACAD SCI USA, V105, P19643, DOI 10.1073/pnas.0810965105
   Pescarmona E, 2006, HISTOPATHOLOGY, V49, P343, DOI 10.1111/j.1365-2559.2006.02506.x
   Petock John M, 2002, ScientificWorldJournal, V2, P1876
   Prinz C, 2015, MOL CANCER, V14, DOI 10.1186/s12943-015-0378-1
   Ragone G, 2009, ONCOGENE, V28, P1329, DOI 10.1038/onc.2008.489
   Rathmell JC, 2003, EUR J IMMUNOL, V33, P2223, DOI 10.1002/eji.200324048
   Ravandi F, 2005, CLIN LYMPHOMA MYELOM, V6, P234, DOI 10.3816/CLM.2005.n.051
   Renosi F, 2021, BLOOD ADV, V5, P1540, DOI 10.1182/bloodadvances.2020003359
   Rodig SJ, 2008, AM J SURG PATHOL, V32, P113, DOI 10.1097/PAS.0b013e3180959e09
   RUSSO G, 1989, P NATL ACAD SCI USA, V86, P602, DOI 10.1073/pnas.86.2.602
   Said JW, 2001, LAB INVEST, V81, P555, DOI 10.1038/labinvest.3780264
   Saliba J, 2015, NAT GENET, V47, P1131, DOI 10.1038/ng.3380
   Schrader A, 2018, NAT COMMUN, V9, DOI 10.1038/s41467-017-02688-6
   Seifert M, 2012, J EXP MED, V209, P2183, DOI 10.1084/jem.20120833
   Shen RR, 2006, BLOOD, V108, P1991, DOI 10.1182/blood-2006-02-001354
   Simonetti G, 2014, BLOOD, V124, P1010, DOI 10.1182/blood-2014-05-577122
   Sivina M, 2012, LEUKEMIA, V26, P1812, DOI 10.1038/leu.2012.63
   Song KH, 2020, NAT COMMUN, V11, DOI 10.1038/s41467-019-14259-y
   Staber PB, 2019, BLOOD, V134, P1132, DOI 10.1182/blood.2019000402
   STERN MH, 1993, ONCOGENE, V8, P2475
   Teitell MA, 2005, AM J CLIN PATHOL, V124, P569, DOI 10.1309/77V7U4E03V69QHRR
   Teitell MA, 2005, NAT REV CANCER, V5, P640, DOI 10.1038/nrc1672
   Trinh DT, 2012, J OBSTET GYNAECOL RE, V38, P841, DOI 10.1111/j.1447-0756.2011.01798.x
   Trivedi P, 2004, BLOOD, V103, P313, DOI 10.1182/blood-2003-05-1710
   Upchurch GM, 2016, FRONT ONCOL, V6, DOI 10.3389/fonc.2016.00182
   Valbuena JR, 2005, AM J CLIN PATHOL, V123, P456, DOI 10.1309/93P42RNG5XBG3KBE
   Vasyutina E, 2015, LEUKEMIA, V29, P2003, DOI 10.1038/leu.2015.114
   VIRGILIO L, 1994, P NATL ACAD SCI USA, V91, P12530, DOI 10.1073/pnas.91.26.12530
   VIRGILIO L, 1993, P NATL ACAD SCI USA, V90, P9275, DOI 10.1073/pnas.90.20.9275
   Virgilio L, 1998, P NATL ACAD SCI USA, V95, P3885, DOI 10.1073/pnas.95.7.3885
   Voltan R, 2011, CLIN CANCER RES, V17, P5649, DOI 10.1158/1078-0432.CCR-11-1064
   Wang XQ, 2010, HEPATOLOGY, V52, P528, DOI 10.1002/hep.23692
   Wang XW, 2014, ONCOL REP, V31, P1745, DOI 10.3892/or.2014.3003
   Weng JS, 2018, BLOOD, V132, DOI 10.1182/blood-2018-99-115424
   Weng JS, 2012, BLOOD, V120, P1613, DOI 10.1182/blood-2011-09-382838
   Woo SR, 2018, BIOCHEM BIOPH RES CO, V503, P1812, DOI 10.1016/j.bbrc.2018.07.118
NR 118
TC 0
Z9 0
U1 1
U2 1
PU MDPI
PI BASEL
PA ST ALBAN-ANLAGE 66, CH-4052 BASEL, SWITZERLAND
EI 2072-6694
J9 CANCERS
JI Cancers
PD NOV
PY 2021
VL 13
IS 21
AR 5455
DI 10.3390/cancers13215455
PG 18
WC Oncology
WE Science Citation Index Expanded (SCI-EXPANDED)
SC Oncology
GA WX0VB
UT WOS:000718321700001
PM 34771618
OA Green Published, gold
DA 2022-04-10
ER

PT J
AU Wang, GY
   Yuan, JT
   Luo, J
   Ocansey, DKW
   Zhang, X
   Qian, H
   Xu, WR
   Mao, F
AF Wang, Gaoying
   Yuan, Jintao
   Luo, Ji
   Ocansey, Dickson Kofi Wiredu
   Zhang, Xu
   Qian, Hui
   Xu, Wenrong
   Mao, Fei
TI Emerging role of protein modification in inflammatory bowel disease
SO JOURNAL OF ZHEJIANG UNIVERSITY-SCIENCE B
LA English
DT Review
DE Inflammatory bowel disease (IBD); Protein modification; Neddylation;
   Sumoylation; Glycosylation; Acetylation
ID nf-kappa b; NEDD8-ACTIVATING ENZYME-INHIBITOR; CULLIN-RING LIGASES;
   LACTOBACILLUS-PLANTARUM; NEGATIVE REGULATION; O-GLYCOSYLATION;
   DOWN-REGULATION; T-CELLS; NEDDYLATION; NEDD8
AB The onset of inflammatory bowel disease (IBD) involves many factors, including environmental parameters, microorganisms, and the immune system. Although research on IBD continues to expand, the specific pathogenesis mechanism is still unclear. Protein modification refers to chemical modification after protein biosynthesis, also known as post-translational modification, which causes changes in the properties and functions of proteins. Since proteins can be modified in different ways, such as acetylation, methylation, and phosphorylation, the functions of proteins in different modified states will also be different. Transitions between different states of protein or changes in modification sites can regulate protein properties and functions. Such modifications like neddylation, sumoylation, glycosylation, and acetylation can activate or inhibit various signaling pathway (e.g., nuclear factor-kappa B (NF-kappa B), extracellular signal-regulated kinase (ERK), and protein kinase B (AKT)) by changing the intestinal flora, regulating immune cells, modulating the release of cytokines such as interleukin-1 beta (IL-1 beta), tumor necrosis factor-alpha (TNF-alpha), and interferon-gamma (IFN-gamma), and ultimately leading to the maintenance of the stability of the intestinal epithelial barrier. In this review, we focus on the current understanding of PTM and describe its regulatory role in the pathogenesis of IBD.
C1 [Wang, Gaoying; Luo, Ji; Ocansey, Dickson Kofi Wiredu; Zhang, Xu; Qian, Hui; Xu, Wenrong; Mao, Fei] Jiangsu Univ, Sch Med, Key Lab Med Sci & Lab Med Jiangsu Prov, Zhenjiang 212013, Jiangsu, Peoples R China.
   [Wang, Gaoying] Nanjing Med Univ, Wuxi Maternal & Child Hlth Hosp, Clin Lab, Wuxi 214002, Jiangsu, Peoples R China.
   [Yuan, Jintao] Nantong Univ, Affiliated Danyang Hosp, Peoples Hosp Danyang, Clin Lab, Zhenjiang 212300, Jiangsu, Peoples R China.
   [Ocansey, Dickson Kofi Wiredu] Univ Cape Coast, Directorate Univ Hlth Serv, Cape Coast 02630, Ghana.
RP Mao, F (corresponding author), Jiangsu Univ, Sch Med, Key Lab Med Sci & Lab Med Jiangsu Prov, Zhenjiang 212013, Jiangsu, Peoples R China.
EM maofei2003@ujs.edu.cn
FU Zhenjiang Key Research and Development Plan (Social Development)
   [SH2019025]; Scientific Research Project of Health Commission of Jiangsu
   Province [Z2019036]; Science and Technology Innovation Fund Project of
   Zhenjiang City [SH2021066]; Taicang Science and Technology Planning
   Project [TC2020JCYL17]
FX This work was supported by the Zhenjiang Key Research and Development
   Plan (Social Development) (No. SH2019025), the Scientific Research
   Project of Health Commission of Jiangsu Province (No. Z2019036), the
   Science and Technology Innovation Fund Project of Zhenjiang City (No.
   SH2021066), and the Taicang Science and Technology Planning Project (No.
   TC2020JCYL17), China.
CR Ananthakrishnan AN, 2015, NAT REV GASTRO HEPAT, V12, P205, DOI 10.1038/nrgastro.2015.34
   Baeza J, 2016, TRENDS BIOCHEM SCI, V41, P231, DOI 10.1016/j.tibs.2015.12.006
   Barbier-Torres L, 2015, ONCOTARGET, V6, P2509, DOI 10.18632/oncotarget.3191
   Baumgart DC, 2007, LANCET, V369, P1627, DOI 10.1016/S0140-6736(07)60750-8
   Brown SJ, 2004, INFLAMM BOWEL DIS, V10, P546, DOI 10.1097/00054725-200409000-00008
   Caruso R, 2014, MUCOSAL IMMUNOL, V7, P1467, DOI 10.1038/mi.2014.35
   Colgan SP, 2010, NAT REV GASTRO HEPAT, V7, P281, DOI 10.1038/nrgastro.2010.39
   Coskun M, 2011, CLIN CHIM ACTA, V412, P513, DOI 10.1016/j.cca.2010.12.020
   Curtis VF, 2015, COMPUT STRUCT BIOTEC, V13, P273, DOI 10.1016/j.csbj.2014.10.002
   Curtis VF, 2015, FASEB J, V29, P208, DOI 10.1096/fj.14-259663
   Dalmasso G, 2019, CELLS-BASEL, V8, DOI 10.3390/cells8010035
   Demarque MD, 2011, GASTROENTEROLOGY, V140, P286, DOI 10.1053/j.gastro.2010.10.002
   Demetriou M, 2001, NATURE, V409, P733, DOI 10.1038/35055582
   Dias AM, 2018, P NATL ACAD SCI USA, V115, pE4651, DOI 10.1073/pnas.1720409115
   Dias AM, 2014, HUM MOL GENET, V23, P2416, DOI 10.1093/hmg/ddt632
   Dierckx T, 2019, J CROHNS COLITIS, V13, P389, DOI 10.1093/ecco-jcc/jjy162
   Docena G, 2010, CLIN EXP IMMUNOL, V162, P108, DOI 10.1111/j.1365-2249.2010.04203.x
   Ehrentraut SF, 2016, MOL BIOL CELL, V27, P3687, DOI 10.1091/mbc.E16-05-0273
   Ehrentraut SF, 2013, J IMMUNOL, V190, P392, DOI 10.4049/jimmunol.1202041
   Ehrentraut SF, 2012, INFLAMM BOWEL DIS, V18, P1378, DOI 10.1002/ibd.22859
   Embade N, 2012, HEPATOLOGY, V55, P1237, DOI 10.1002/hep.24795
   Enchev RI, 2015, NAT REV MOL CELL BIO, V16, P30, DOI 10.1038/nrm3919
   Flotho A, 2013, ANNU REV BIOCHEM, V82, P357, DOI 10.1146/annurev-biochem-061909-093311
   Foster SL, 2009, CLIN IMMUNOL, V130, P7, DOI 10.1016/j.clim.2008.08.015
   Fritah S, 2014, EMBO REP, V15, P965, DOI 10.15252/embr.201338386
   Fujii H, 2016, GASTROENTEROLOGY, V150, P1620, DOI 10.1053/j.gastro.2016.03.002
   Fujimoto K, 2017, MUCOSAL IMMUNOL, V10, P446, DOI 10.1038/mi.2016.58
   Glorian V, 2017, CELL DEATH DIS, V8, DOI 10.1038/cddis.2017.222
   Godbersen JC, 2014, CLIN CANCER RES, V20, P1576, DOI 10.1158/1078-0432.CCR-13-0987
   Goto Y, 2014, SCIENCE, V345, P1310, DOI 10.1126/science.1254009
   Grigorian A, 2012, ANN NY ACAD SCI, V1253, P49, DOI 10.1111/j.1749-6632.2011.06391.x
   Grigorian A, 2009, IMMUNOL REV, V230, P232, DOI 10.1111/j.1600-065X.2009.00796.x
   Grimm V, 2016, ADV EXP MED BIOL, V902, P109, DOI 10.1007/978-3-319-31248-4_8
   Grootjans J, 2016, NAT REV IMMUNOL, V16, P469, DOI 10.1038/nri.2016.62
   Haglund K, 2005, EMBO J, V24, P3353, DOI 10.1038/sj.emboj.7600808
   Han K, 2016, ONCOTARGET, V7, P23812, DOI 10.18632/oncotarget.8068
   Han ZJ, 2018, INT J ONCOL, V52, P1081, DOI 10.3892/ijo.2018.4280
   Hanic M, 2019, BBA-GEN SUBJECTS, V1863, P1595, DOI 10.1016/j.bbagen.2019.07.001
   Hannoun Z, 2016, CYTOKINE GROWTH F R, V29, P3, DOI 10.1016/j.cytogfr.2016.04.003
   Hay RT, 2005, MOL CELL, V18, P1, DOI 10.1016/j.molcel.2005.03.012
   He ML, 2017, J PATHOL, V242, P309, DOI 10.1002/path.4905
   Hibberd AA, 2017, BMJ OPEN GASTROENTER, V4, DOI 10.1136/bmjgast-2017-000145
   Honda K, 2016, NATURE, V535, P75, DOI 10.1038/nature18848
   Hori T, 1999, ONCOGENE, V18, P6829, DOI 10.1038/sj.onc.1203093
   Johnson JL, 2013, TRENDS IMMUNOL, V34, P290, DOI 10.1016/j.it.2013.01.006
   Joshi HJ, 2018, CELL, V172, P632, DOI 10.1016/j.cell.2018.01.016
   Kamitani T, 1997, J BIOL CHEM, V272, P28557, DOI 10.1074/jbc.272.45.28557
   Khoury J, 2007, J CLIN INVEST, V117, P703, DOI 10.1172/JCI30049
   Kim DY, 2013, MOL CELL, V49, P632, DOI 10.1016/j.molcel.2012.12.012
   Koch S, 2012, ANNU REV PATHOL-MECH, V7, P35, DOI 10.1146/annurev-pathol-011811-120905
   Kominsky DJ, 2010, J IMMUNOL, V184, P4062, DOI 10.4049/jimmunol.0903002
   Kudelka MR, 2020, NAT REV GASTRO HEPAT, V17, P597, DOI 10.1038/s41575-020-0331-7
   Kumar A, 2007, EMBO J, V26, P4457, DOI 10.1038/sj.emboj.7601867
   Letterio JJ, 1998, ANNU REV IMMUNOL, V16, P137, DOI 10.1146/annurev.immunol.16.1.137
   Liu J, 2016, IMMUNITY, V45, P15, DOI 10.1016/j.immuni.2016.06.020
   Liu ZH, 2010, WORLD J GASTROENTERO, V16, P5759, DOI 10.3748/wjg.v16.i45.5759
   Liu ZH, 2011, MOL BIOL REP, V38, P1353, DOI 10.1007/s11033-010-0237-5
   Liu ZH, 2011, MOL BIOL REP, V38, P3471, DOI 10.1007/s11033-010-0457-8
   Mabb AM, 2007, CELL MOL LIFE SCI, V64, P1979, DOI 10.1007/s00018-007-7005-2
   Majumdar D, 2012, INT J EXP PATHOL, V93, P305, DOI 10.1111/j.1365-2613.2012.00830.x
   Melhem H, 2016, GUT, V65, P595, DOI 10.1136/gutjnl-2014-307030
   Meng J, 2016, J AUTOIMMUN, V73, P42, DOI 10.1016/j.jaut.2016.05.012
   Milhollen MA, 2010, BLOOD, V116, P1515, DOI 10.1182/blood-2010-03-272567
   Mitchell JP, 2018, INT REV CEL MOL BIO, V335, P41, DOI 10.1016/bs.ircmb.2017.07.007
   Mkhikian H, 2011, NAT COMMUN, V2, DOI 10.1038/ncomms1333
   Monteleone G, 2001, J CLIN INVEST, V108, P601, DOI 10.1172/JCI12821
   Monteleone G, 2004, TRENDS IMMUNOL, V25, P513, DOI 10.1016/j.it.2004.07.008
   Monteleone G, 2005, GASTROENTEROLOGY, V129, P1420, DOI 10.1053/j.gastro.2005.09.005
   Muniandy K, 2018, J IMMUNOL RES, V2018, DOI 10.1155/2018/3430684
   Mustfa SA, 2017, OPEN BIOL, V7, DOI 10.1098/rsob.170024
   Nava P, 2010, IMMUNITY, V32, P392, DOI 10.1016/j.immuni.2010.03.001
   Neish AS, 2000, SCIENCE, V289, P1560, DOI 10.1126/science.289.5484.1560
   Oved S, 2006, J BIOL CHEM, V281, P21640, DOI 10.1074/jbc.M513034200
   Pan ZQ, 2004, ONCOGENE, V23, P1985, DOI 10.1038/sj.onc.1207414
   PERDOMO OJJ, 1994, J EXP MED, V180, P1307, DOI 10.1084/jem.180.4.1307
   Pereira MS, 2018, FRONT IMMUNOL, V9, DOI 10.3389/fimmu.2018.02754
   Porter AG, 1999, CELL DEATH DIFFER, V6, P99, DOI 10.1038/sj.cdd.4400476
   Qin HL, 2009, BMC MICROBIOL, V9, DOI 10.1186/1471-2180-9-63
   Rabut G, 2008, EMBO REP, V9, P969, DOI 10.1038/embor.2008.183
   Rausch P, 2011, P NATL ACAD SCI USA, V108, P19030, DOI 10.1073/pnas.1106408108
   Raza A, 2017, J LEUKOCYTE BIOL, V102, P1219, DOI 10.1189/jlb.2AB0116-009RR
   Ribet D, 2010, NATURE, V464, P1192, DOI 10.1038/nature08963
   Rodriguez RM, 2015, INT J BIOCHEM CELL B, V67, P75, DOI 10.1016/j.biocel.2015.04.020
   Ryan SO, 2012, SEMIN IMMUNOPATHOL, V34, P425, DOI 10.1007/s00281-012-0309-9
   Saul VV, 2015, BBA-MOL CELL RES, V1853, P136, DOI 10.1016/j.bbamcr.2014.10.008
   Schreiner Philipp, 2019, Inflamm Intest Dis, V4, P79, DOI 10.1159/000500721
   Schwechheimer C, 2018, CURR OPIN PLANT BIOL, V45, P112, DOI 10.1016/j.pbi.2018.05.017
   Sedda S, 2018, FRONT IMMUNOL, V9, DOI 10.3389/fimmu.2018.01854
   Shakespear MR, 2011, TRENDS IMMUNOL, V32, P335, DOI 10.1016/j.it.2011.04.001
   Silva JPB, 2018, CURR PHARM DESIGN, V24, P4154, DOI 10.2174/1381612824666181001153605
   Simurina M, 2018, GASTROENTEROLOGY, V154, P1320, DOI 10.1053/j.gastro.2018.01.002
   Singh AK, 2018, NAT COMMUN, V9, DOI 10.1038/s41467-018-06924-5
   Singh UP, 2012, INT REV IMMUNOL, V31, P66, DOI 10.3109/08830185.2011.642909
   Skelly MJ, 2019, P NATL ACAD SCI USA, V116, P17090, DOI 10.1073/pnas.1900052116
   Sommer F, 2014, PLOS ONE, V9, DOI 10.1371/journal.pone.0085254
   Song H, 2016, J IMMUNOL, V196, P3117, DOI 10.4049/jimmunol.1501752
   Soucy TA, 2009, NATURE, V458, P732, DOI 10.1038/nature07884
   Srikanth B, 2010, J BIOL CHEM, V285, P34062, DOI 10.1074/jbc.M109.098996
   Stickle NH, 2004, MOL CELL BIOL, V24, P3251, DOI 10.1128/MCB.24.8.3251-3261.2004
   Sugihara K, 2019, FRONT IMMUNOL, V9, DOI 10.3389/fimmu.2018.03183
   Suzuki K, 2018, CELL STRUCT FUNCT, V43, P25, DOI 10.1247/csf.17022
   Tamir A, 2017, APPL ENVIRON MICROB, V83, DOI 10.1128/AEM.03152-16
   Theodoratou E, 2014, NAT REV GASTRO HEPAT, V11, P588, DOI 10.1038/nrgastro.2014.78
   Tokuhira N, 2015, INT J MOL MED, V35, P10, DOI 10.3892/ijmm.2014.1981
   Tsukamoto S, 2016, CHEM PHARM BULL, V64, P112, DOI 10.1248/cpb.c15-00768
   Veldhoen M, 2017, NAT IMMUNOL, V18, P612, DOI 10.1038/ni.3742
   Ventham NT, 2013, GASTROENTEROLOGY, V145, P293, DOI 10.1053/j.gastro.2013.05.050
   Verdin E, 2015, NAT REV MOL CELL BIO, V16, P258, DOI 10.1038/nrm3931
   Verhelst X, 2020, GASTROENTEROLOGY, V158, P95, DOI 10.1053/j.gastro.2019.08.060
   Verma S, 2015, MOL CELL BIOL, V35, P2932, DOI 10.1128/MCB.00397-15
   Verma V, 2018, MOL PLANT PATHOL, V19, P1537, DOI 10.1111/mpp.12625
   Wadzinski TJ, 2018, NAT CHEM, V10, P644, DOI 10.1038/s41557-018-0041-8
   Wang GY, 2020, CLIN TRANSL MED, V10, DOI 10.1002/ctm2.113
   Wang M, 2016, NATURE, V529, P326, DOI 10.1038/nature17041
   Wang R, 2019, ADV EXP MED BIOL, V1206, P237, DOI 10.1007/978-981-15-0602-4_12
   Weber A, 2010, SCI SIGNAL, V3, DOI 10.1126/scisignal.3105cm2
   Wei G, 2009, IMMUNITY, V30, P155, DOI 10.1016/j.immuni.2008.12.009
   Wolfert MA, 2013, NAT CHEM BIOL, V9, P776, DOI [10.1038/NCHEMBIO.1403, 10.1038/nchembio.1403]
   Wu YB, 2018, AM J TRANSL RES, V10, P2026
   Xia PY, 2015, NAT COMMUN, V6, DOI 10.1038/ncomms9132
   Xirodimas DP, 2008, EMBO REP, V9, P280, DOI 10.1038/embor.2008.10
   Xirodimas DP, 2004, CELL, V118, P83, DOI 10.1016/j.cell.2004.06.016
   Yang YF, 2017, OPEN BIOL, V7, DOI 10.1098/rsob.170167
   Yang Y, 2018, CELL PHYSIOL BIOCHEM, V47, P2159, DOI 10.1159/000491527
   Yavvari PS, 2019, NANOSCALE, V11, P4970, DOI 10.1039/c8nr09599j
   Yin MM, 2018, CELL PHYSIOL BIOCHEM, V45, P474, DOI 10.1159/000487027
   You BH, 2017, INT IMMUNOPHARMACOL, V49, P212, DOI 10.1016/j.intimp.2017.05.040
   Zhang MM, 2019, INT IMMUNOL, V31, P499, DOI 10.1093/intimm/dxz022
   Zhang Q, 2015, NATURE, V525, P389, DOI 10.1038/nature15252
   Zhao YC, 2014, ANTIOXID REDOX SIGN, V21, P2383, DOI 10.1089/ars.2013.5795
   Zhao YC, 2013, CURR PHARM DESIGN, V19, P3215, DOI 10.2174/13816128113199990300
   Zhong XYS, 2018, CELL MOL GASTROENTER, V6, P65, DOI 10.1016/j.jcmgh.2018.02.014
NR 132
TC 0
Z9 0
U1 1
U2 1
PU ZHEJIANG UNIV PRESS
PI Hangzhou
PA Xixi Campus, Zhejiang University, No. 148 Tianmushan Road, Hangzhou,
   Zhejiang, PEOPLES R CHINA
SN 1673-1581
EI 1862-1783
J9 J ZHEJIANG UNIV-SC B
JI J. Zhejiang Univ.-SCI. B
PD MAR
PY 2022
VL 23
IS 3
BP 173
EP 188
DI 10.1631/jzus.B2100114
PG 16
WC Biochemistry & Molecular Biology; Biotechnology & Applied Microbiology;
   Medicine, Research & Experimental
WE Science Citation Index Expanded (SCI-EXPANDED)
SC Biochemistry & Molecular Biology; Biotechnology & Applied Microbiology;
   Research & Experimental Medicine
GA ZV1YJ
UT WOS:000770330400001
PM 35261214
OA Green Published
DA 2022-04-10
ER

PT J
AU Yoo, C
   Pal, M
   Miller, FR
   Barder, TJ
   Huber, C
   Lubman, DM
AF Yoo, Chul
   Pal, Manoj
   Miller, Fred R.
   Barder, Timothy J.
   Huber, Christian
   Lubman, David M.
TI Toward high sequence coverage of proteins in human breast cancer cells
   using on-line monolith-based HPLC-ESI-TOF MS compared to CE MS
SO ELECTROPHORESIS
LA English
DT Article
DE electrospray ionization; high sequence coverage; isoform; monolith;
   peptide mass fingerprinting
ID IONIZATION mass spectrometry; LIQUID-PHASE SEPARATION; CAPILLARY
   COLUMNS; ACTIN; IDENTIFICATION; ELECTROPHORESIS; PROTEOMICS; peptide;
   STRATEGY; DISEASE
AB A method is developed toward high sequence coverage of proteins isolated from human breast cancer MCF10 cell lines using a 2-D liquid separations. Monolithic-capillary columns prepared by copolymerizing styrene with divinylbenzene are used to achieve high-resolution separation of peptide from protein digests. This separation is performed with minimal sample preparation directly from the 2-D liquid fractionation of the cell lysate. The monolithic column separation is directly interfaced to ESI-TOF MS to obtain a peptide map. The protein digests were also analyzed by MALDI-TOF MS and an accurate M, of the intact protein was obtained using an HPLC-ESI-TOF MS. The result is that these techniques provide complementary information where nearly complete sequence coverage of the protein is obtained and can be compared to the experimental M-r value. The high sequence coverage provides information on isoforms and other post-translational modification that would not be available from methods that result in low sequence coverage. The results from the use of monolithic columns are compared to that obtained by CE-MS. The monolithic column separations provide a rugged and highly reproducible method for separating protein digests prior to MS analysis and is suited to confidently identify biomarkerss associated with cancer progression.
C1 Univ Michigan, Dept Chem, Ann Arbor, MI 48109 USA.
   Wayne State Univ, Barbara Ann Karmanos Canc Inst, Detroit, MI USA.
   Eprogen Inc, Darien, IL USA.
   Univ Saarland, Dept Chem Instrumental Anal & Bioanal, D-6600 Saarbrucken, Germany.
   Univ Michigan, Med Ctr, Dept Surg, Ann Arbor, MI 48109 USA.
   Univ Michigan, Med Ctr, Ctr Comprehens Canc, Ann Arbor, MI 48109 USA.
RP Lubman, DM (corresponding author), Univ Michigan, Dept Chem, 930 N Univ Ave, Ann Arbor, MI 48109 USA.
EM dmlubman@umich.edu
RI Huber, Christian G./E-5445-2011
OI Huber, Christian G./0000-0001-8358-1880
FU NATIONAL CANCER INSTITUTEUnited States Department of Health & Human
   ServicesNational Institutes of Health (NIH) - USANIH National Cancer
   Institute (NCI) [R01CA090503] Funding Source: NIH RePORTER; NATIONAL
   INSTITUTE OF GENERAL MEDICAL SCIENCESUnited States Department of Health
   & Human ServicesNational Institutes of Health (NIH) - USANIH National
   Institute of General Medical Sciences (NIGMS) [R01GM049500] Funding
   Source: NIH RePORTER; NCI NIH HHSUnited States Department of Health &
   Human ServicesNational Institutes of Health (NIH) - USANIH National
   Cancer Institute (NCI) [R01CA90503] Funding Source: Medline; NIGMS NIH
   HHSUnited States Department of Health & Human ServicesNational
   Institutes of Health (NIH) - USANIH National Institute of General
   Medical Sciences (NIGMS) [R01 GM 49500] Funding Source: Medline
CR Abe A, 2000, BIOCHEM BIOPH RES CO, V268, P14, DOI 10.1006/bbrc.1999.2069
   ASATOOR AM, 1967, BIOCHEM BIOPH RES CO, V26, P168, DOI 10.1016/0006-291X(67)90229-X
   Beranova-Giorgianni S, 2003, TRAC-TREND ANAL CHEM, V22, P273, DOI 10.1016/S0165-9936(03)00508-9
   Bini L, 1997, ELECTROPHORESIS, V18, P2832, DOI 10.1002/elps.1150181519
   Broers JLV, 2004, J PATHOL, V204, P478, DOI 10.1002/path.1655
   GARRELS JI, 1976, CELL, V9, P793, DOI 10.1016/0092-8674(76)90142-2
   Goodlett David R, 2002, Funct Integr Genomics, V2, P138
   Hale JE, 2000, ANAL BIOCHEM, V287, P110, DOI 10.1006/abio.2000.4834
   Hamler RL, 2004, PROTEOMICS, V4, P562, DOI 10.1002/pmic.200300606
   HAN KK, 1992, INT J BIOCHEM, V24, P19
   Holzl G, 2005, ANAL CHEM, V77, P673, DOI 10.1021/ac0487395
   Kimura H, 2004, J SEP SCI, V27, P897, DOI 10.1002/jssc.200401842
   Krause E, 1999, ANAL CHEM, V71, P4160, DOI 10.1021/ac990298f
   Kreunin P, 2004, PROTEOMICS, V4, P2754, DOI 10.1002/pmic.200300767
   Lee D, 2004, J CHROMATOGR A, V1051, P53, DOI 10.1016/j.chroma.2004.04.047
   Mann M, 2003, NAT BIOTECHNOL, V21, P255, DOI 10.1038/nbt0303-255
   Moir RD, 2001, CELL MOL LIFE SCI, V58, P1748, DOI 10.1007/PL00000814
   Moore RE, 1998, ANAL CHEM, V70, P4879, DOI 10.1021/ac980723p
   Nyman T, 2002, J MOL BIOL, V317, P577, DOI 10.1006/jmbi.2002.5436
   O'Donovan C, 2001, TRENDS BIOTECHNOL, V19, P178, DOI 10.1016/S0167-7799(01)01598-0
   OFARRELL PH, 1975, J BIOL CHEM, V250, P4007
   Padliya ND, 2004, PROTEOMICS, V4, P466, DOI 10.1002/pmic.200300567
   Pelzing M, 2005, ELECTROPHORESIS, V26, P2717, DOI 10.1002/elps.200410424
   Premstaller A, 2000, ANAL CHEM, V72, P4386, DOI 10.1021/ac000283d
   Premstaller A, 2001, ANAL CHEM, V73, P2390, DOI 10.1021/ac010046q
   RAGHAVAN M, 1989, ANAL BIOCHEM, V178, P194, DOI 10.1016/0003-2697(89)90378-3
   RUBENSTEIN PA, 1983, J BIOL CHEM, V258, P3961
   Santner SJ, 2001, BREAST CANCER RES TR, V65, P101, DOI 10.1023/A:1006461422273
   Toll H, 2005, J CHROMATOGR A, V1079, P274, DOI 10.1016/j.chroma.2005.03.121
   VANDEKERCKHOVE J, 1978, J MOL BIOL, V126, P783, DOI 10.1016/0022-2836(78)90020-7
   VANDEKERCKHOVE J, 1978, EUR J BIOCHEM, V90, P451, DOI 10.1111/j.1432-1033.1978.tb12624.x
   Vlahou A, 2005, J CHROMATOGR B, V814, P11, DOI 10.1016/j.jchromb.2004.10.024
   Walcher W, 2002, J CHROMATOGR B, V782, P111, DOI 10.1016/S1570-0232(02)00667-0
   Wall DB, 1999, ANAL CHEM, V71, P3894, DOI 10.1021/ac990120t
   Wall DB, 2001, RAPID COMMUN MASS SP, V15, P1649, DOI 10.1002/rcm.421
   Wang HX, 2004, PROTEOMICS, V4, P2476, DOI 10.1002/pmic.200300763
   Wilson KL, 2001, CELL, V104, P647, DOI 10.1016/S0092-8674(01)00261-6
   Wu W, 2002, INT J GYNECOL CANCER, V12, P409, DOI 10.1046/j.1525-1438.2002.01200.x
   Zhu K, 2003, ANAL CHEM, V75, P6209, DOI 10.1021/ac0346454
NR 39
TC 13
Z9 14
U1 0
U2 14
PU WILEY
PI HOBOKEN
PA 111 RIVER ST, HOBOKEN 07030-5774, NJ USA
SN 0173-0835
EI 1522-2683
J9 ELECTROPHORESIS
JI Electrophoresis
PD JUN
PY 2006
VL 27
IS 11
SI SI
BP 2126
EP 2138
DI 10.1002/elps.200500651
PG 13
WC Biochemical Research Methods; Chemistry, Analytical
WE Science Citation Index Expanded (SCI-EXPANDED)
SC Biochemistry & Molecular Biology; Chemistry
GA 055FL
UT WOS:000238435300010
PM 16637017
OA Green Published
DA 2022-04-10
ER

PT J
AU Alsterda, A
   Asha, K
   Powrozek, O
   Repak, M
   Goswami, S
   Dunn, AM
   Memmel, HC
   Sharma-Walia, N
AF Alsterda, Andrew
   Asha, Kumari
   Powrozek, Olivia
   Repak, Miroslava
   Goswami, Sudeshna
   Dunn, Alexandra M.
   Memmel, Heidi C.
   Sharma-Walia, Neelam
TI Salubrinal Exposes Anticancer Properties in Inflammatory Breast Cancer
   Cells by Manipulating the Endoplasmic Reticulum Stress Pathway
SO FRONTIERS IN ONCOLOGY
LA English
DT Article
DE endoplasmic reticulum stress; inflammatory breast cancer; Salubrinal;
   phenylbutyrate; osteoprotegerin
ID OXIDATIVE STRESS; PROLIFERATION; ATTENUATION
AB The endoplasmic reticulum (ER) regulates protein folding, post-translational modification, lipid synthesis, and calcium signaling to attenuate the accumulation of misfolded proteins causing ER stress and maintains cellular homeostasis. The tumor microenvironment is rich in soluble cytokines, chemokines, growth, and angiogenic factors and can drive the ER's abnormal functioning in healthy cells. Cancer cells adapt well to the tumor microenvironment induced ER stress. We identified that the inflammatory breast cancer (IBC) cells abundantly express osteoprotegerin (OPG) and their tumor microenvironment is rich in OPG protein. OPG also called osteoclast differentiation factor/osteoclastogenesis inhibitory factor (OCIF) is a soluble decoy receptor for receptor activator of nuclear factor-kappa B ligand (RANKL). Employing mass spectrometry analysis, we identified a set of ER chaperones associated with OPG in IBC cell lysates (SUM149PT, SUM1315MO2) compared to healthy human mammary epithelial cells (HMEC). Proximity ligation assay (PLA) and immunoprecipitation assay validated the interaction between OPG and ER chaperone and master regulator of unfolded protein response (UPR) GRP78/BiP (glucose-regulated protein/Binding immunoglobulin protein). We detected remarkably high gene expression of CCAAT enhancer-binding protein homologous protein (CHOP), inositol-requiring enzyme 1 (IRE1 alpha), protein disulfide-isomerase (PDI), PKR-like ER kinase (PERK), activating transcription factor 4 (ATF4), X-box binding protein 1 (XBP-1) and growth arrest and DNA damage-inducible protein (GADD34) in SUM149PT and SUM190PT cells when compared to HMEC. Similarly, tissue sections of human IBC expressed high levels of ER stress proteins. We evaluated cell death and apoptosis upon Salubrinal and phenylbutyrate treatment in healthy and IBC cells by caspase-3 activity and cleaved poly (ADP-ribose) polymerase (PARP) protein assay. IBC (SUM149PT and SUM190PT) cells were chemosensitive to Salubrinal treatment, possibly via inhibition in OPG secretion, upregulating ATF4, and CHOP, thus ultimately driving caspase-3 mediated IBC cell death. Salubrinal treatment upregulated PDI, which connects ER stress to oxidative stress. We observed increased ROS production and reduced cell proliferation of Salubrinal treated IBC cells. Treatment with antioxidants could rescue IBC cells from ROS and aborted cell proliferation. Our findings implicate that manipulating ER stress with Salubrinal may provide a safer and tailored strategy to target the growth of inflammatory and aggressive forms of breast cancer.
C1 [Alsterda, Andrew; Asha, Kumari; Powrozek, Olivia; Repak, Miroslava; Goswami, Sudeshna; Sharma-Walia, Neelam] Rosalind Franklin Univ Med & Sci, Chicago Med Sch, Dept Microbiol & Immunol, HM Bligh Canc Res Labs, N Chicago, IL 60064 USA.
   [Dunn, Alexandra M.] Lake Forest Coll, Lake Forest, IL 60045 USA.
   [Memmel, Heidi C.] Advocate Hlth Care, Park Ridge, IL USA.
RP Sharma-Walia, N (corresponding author), Rosalind Franklin Univ Med & Sci, Chicago Med Sch, Dept Microbiol & Immunol, HM Bligh Canc Res Labs, N Chicago, IL 60064 USA.
EM neelam.sharma-walia@rosalindfranklin.edu
RI Asha, Kumari/S-4024-2016
OI Asha, Kumari/0000-0003-4677-0425
FU Center for Cancer Cell Biology, Immunology and Infection; RFUMS-Advocate
   Lutheran General Hospital grant; RFUMS start-up fund
FX We are grateful for funding support from the Center for Cancer Cell
   Biology, Immunology and Infection, RFUMS-Advocate Lutheran General
   Hospital grant and RFUMS start-up fund to NS-W. The funders had no role
   in the design, decision to publish, or preparation of the manuscript.
CR Anderson William F, 2005, Breast Dis, V22, P9
   Back SH, 2009, CELL METAB, V10, P13, DOI 10.1016/j.cmet.2009.06.002
   Bobrovnikova-Marjon E, 2010, ONCOGENE, V29, P3881, DOI 10.1038/onc.2010.153
   Boyce M, 2005, SCIENCE, V307, P935, DOI 10.1126/science.1101902
   Bruning A, 2009, INVEST NEW DRUG, V27, P543, DOI 10.1007/s10637-008-9206-4
   Cheng K., 2013, J GENET SYNDROMES GE, V4, P1, DOI [10.4172/2157-7412.1000153, DOI 10.4172/2157-7412.1000153]
   Chinnaiyan AM, 2000, P NATL ACAD SCI USA, V97, P1754, DOI 10.1073/pnas.030545097
   Clezardin P, 2011, B CANCER, V98, P837, DOI 10.1684/bdc.2011.1398
   Cristofanilli Massimo, 2004, Clin Breast Cancer, V4, P415, DOI 10.3816/CBC.2004.n.004
   Daneshmand S, 2007, HUM PATHOL, V38, P1547, DOI 10.1016/j.humpath.2007.03.014
   Davies MPA, 2008, INT J CANCER, V123, P85, DOI 10.1002/ijc.23479
   Doron B, 2019, LEUKEMIA, V33, P918, DOI 10.1038/s41375-018-0254-2
   Drexler HCA, 2009, PLOS ONE, V4, DOI 10.1371/journal.pone.0004161
   Funakoshi Y, 2019, PLOS ONE, V14, DOI 10.1371/journal.pone.0222336
   Fusakio ME, 2016, MOL BIOL CELL, V27, P1536, DOI 10.1091/mbc.E16-01-0039
   Gogas H, 2010, CLIN BREAST CANCER, V10, P230, DOI 10.3816/CBC.2010.n.031
   Goswami S, 2016, ONCOTARGET, V7, P58953, DOI 10.18632/oncotarget.9835
   Goswami S, 2016, ONCOTARGET, V7, P42777, DOI 10.18632/oncotarget.8658
   Goswami S, 2015, BMC CANCER, V15, DOI 10.1186/s12885-015-1837-1
   Guan G, 2019, HUM EXP TOXICOL, V38, P655, DOI 10.1177/0960327119836222
   Han J, 2013, NAT CELL BIOL, V15, P481, DOI 10.1038/ncb2738
   Hance KW, 2005, JNCI-J NATL CANCER I, V97, P966, DOI 10.1093/jnci/dji172
   Hetz C, 2013, NAT REV DRUG DISCOV, V12, P703, DOI 10.1038/nrd3976
   Holen I, 2006, CLIN SCI, V110, P279, DOI 10.1042/CS20050175
   Holen I, 2005, BREAST CANCER RES TR, V92, P207, DOI 10.1007/s10549-005-2419-8
   Hu H, 2019, FRONT IMMUNOL, V9, DOI 10.3389/fimmu.2018.03083
   Iannitti T, 2011, DRUGS R&D, V11, P227, DOI 10.2165/11591280-000000000-00000
   Infante M, 2019, J EXP CLIN CANC RES, V38, DOI 10.1186/s13046-018-1001-2
   Iwata Y, 2012, TRENDS PLANT SCI, V17, P720, DOI 10.1016/j.tplants.2012.06.014
   Jeon YJ, 2016, MOL CELLS, V39, P129, DOI 10.14348/molcells.2016.2243
   Jin HR, 2012, CELL DEATH DIS, V3, DOI 10.1038/cddis.2012.122
   Khateb A, 2020, TRENDS CANCER, V6, P960, DOI 10.1016/j.trecan.2020.05.012
   Kutomi G, 2013, CANCER SCI, V104, P1091, DOI 10.1111/cas.12177
   Lane D, 2012, J OVARIAN RES, V5, DOI 10.1186/1757-2215-5-34
   Lehmann BD, 2011, J CLIN INVEST, V121, P2750, DOI 10.1172/JCI45014
   Lei LJ, 2019, J REPROD DEVELOP, V65, P459, DOI 10.1262/jrd.2019-052
   Lin YN, 2019, BIOMED PHARMACOTHER, V118, DOI 10.1016/j.biopha.2019.109249
   Liu JF, 2012, MOL CARCINOGEN, V51, P315, DOI 10.1002/mc.20787
   Logsdon AE, 2016, BRAIN RES, V1643, P140, DOI 10.1016/j.brainres.2016.04.063
   Makki J, 2015, CLIN MED INSIGHTS-PA, V8, DOI 10.4137/CPath.S31563
   Marciniak SJ, 2004, GENE DEV, V18, P3066, DOI 10.1101/gad.1250704
   Matsuoka M, 2015, INT J MOL SCI, V16, P16275, DOI 10.3390/ijms160716275
   Pili R, 2001, CANCER RES, V61, P1477
   Pootrakul L, 2006, CLIN CANCER RES, V12, P5987, DOI 10.1158/1078-0432.CCR-06-0133
   ROBERTSON JFR, 1994, BREAST CANCER RES TR, V29, P259, DOI 10.1007/BF00666479
   Rueth NM, 2014, J CLIN ONCOL, V32, P2018, DOI 10.1200/JCO.2014.55.1978
   Santos CXC, 2009, ANTIOXID REDOX SIGN, V11, P2409, DOI [10.1089/ars.2009.2625, 10.1089/ARS.2009.2625]
   Schairer C, 2011, BREAST CANCER RES TR, V129, P117, DOI 10.1007/s10549-010-1324-y
   Seervi M, 2013, CELL DEATH DIS, V4, DOI 10.1038/cddis.2013.502
   Sharma-Walia N, 2012, ONCOGENESIS, V1, DOI 10.1038/oncsis.2012.5
   Sharma-Walia N, 2010, J VIROL, V84, P12733, DOI 10.1128/JVI.01065-10
   SHARMAWALIA N, 2010, PLOS PATHOG, V0006
   Son SM, 2014, CELL DEATH DIS, V5, DOI 10.1038/cddis.2014.129
   Takigawa S, 2016, J PHARMACOL SCI, V132, P154, DOI 10.1016/j.jphs.2016.09.006
   Teng Y, 2014, CELL DEATH DIS, V5, DOI 10.1038/cddis.2014.24
   Tu BP, 2004, J CELL BIOL, V164, P341, DOI 10.1083/jcb.200311055
   Ueno NT, 2018, J CANCER, V9, P1437, DOI 10.7150/jca.23969
   Walter P, 2011, SCIENCE, V334, P1081, DOI 10.1126/science.1209038
   Wang M, 2009, ANTIOXID REDOX SIGN, V11, P2307, DOI 10.1089/ARS.2009.2485
   Wang XP, 2020, CANCERS, V12, DOI 10.3390/cancers12092479
   Wielenga MCB, 2015, CELL REP, V13, P489, DOI 10.1016/j.celrep.2015.09.016
   Williams KP, 2013, CANCER LETT, V337, P77, DOI 10.1016/j.canlet.2013.05.017
   Wu CT, 2011, FREE RADICAL BIO MED, V51, P671, DOI 10.1016/j.freeradbiomed.2011.04.038
   Xiao CT, 2011, DIABETES, V60, P918, DOI 10.2337/db10-1433
   Xu YW, 2016, ONCOtarget THER, V9, P2825, DOI 10.2147/OTT.S101794
   Yadav Raj Kumar, 2014, J Cancer Prev, V19, P75, DOI 10.15430/JCP.2014.19.2.75
   Yadavalli T, 2020, SCI ADV, V6, DOI 10.1126/sciadv.abd9443
   Yamauchi H, 2012, ONCOLOGIST, V17, P891, DOI 10.1634/theoncologist.2012-0039
   Yang L, 2019, BIOSCIENCE REP, V39, DOI 10.1042/BSR20190225
   Yokota H, 2013, BMC MUSCULOSKEL DIS, V14, DOI 10.1186/1471-2474-14-197
   Zhao XF, 2016, ONCOTARGET, V7, P85492, DOI 10.18632/oncotarget.13408
NR 71
TC 3
Z9 3
U1 5
U2 6
PU FRONTIERS MEDIA SA
PI LAUSANNE
PA AVENUE DU TRIBUNAL FEDERAL 34, LAUSANNE, CH-1015, SWITZERLAND
SN 2234-943X
J9 FRONT ONCOL
JI Front. Oncol.
PD MAY 20
PY 2021
VL 11
AR 654940
DI 10.3389/fonc.2021.654940
PG 15
WC Oncology
WE Science Citation Index Expanded (SCI-EXPANDED)
SC Oncology
GA SM0NS
UT WOS:000657310300001
PM 34094947
OA gold, Green Published
DA 2022-04-10
ER

PT J
AU Khan, R
   Zahid, S
   Wan, YJY
   Forster, J
   Karim, ABA
   Nawabi, AM
   Azhar, A
   Rahman, MA
   Ahmed, N
AF Khan, Rizma
   Zahid, Saadia
   Wan, Yu-Jui Yvonne
   Forster, Jameson
   Karim, A-Bashar Abdul
   Nawabi, Atta M.
   Azhar, Abid
   Rahman, M. Ataur
   Ahmed, Nikhat
TI Protein expression profiling of nuclear membrane protein reveals
   potential biomarkers of human hepatocellular carcinoma
SO CLINICAL PROTEOMICS
LA English
DT Article
DE Hepatocellular carcinoma; Cytochrome b5A; Two dimensional gel
   electrophoresis; S-nitrosylation; Proteomics; ESI-Q-TOF MS/MS mass
   spectrometry
ID NITRIC-OXIDE SYNTHASE; POSSIBLE INVOLVEMENT; CYTOCHROME B(5);
   FATTY-ACIDS; LIVER; ROLES; ELECTROPHORESIS; MECHANISM; DISEASE; MARKERS
AB Background: Complex molecular events lead to development and progression of liver cirrhosis to HCC. Differentially expressed nuclear membrane associated proteins are responsible for the functional and structural alteration during the progression from cirrhosis to carcinoma. Although alterations/ post translational modifications in protein expression have been extensively quantified, complementary analysis of nuclear membrane proteome changes have been limited. Deciphering the molecular mechanism that differentiate between normal and disease state may lead to identification of biomarkerss for carcinoma.
   Results: Many proteins displayed differential expression when nuclear membrane proteome of hepatocellular carcinoma (HCC), fibrotic liver, and HepG2 cell line were assessed using 2-DE and ESI-Q-TOF MS/MS. From the down regulated set in HCC, we have identified for the first time a 15 KDa cytochrome b5A (CYB5A), ATP synthase subunit delta (ATPD) and Hemoglobin subunit beta (HBB) with 11, 5 and 22 peptide matches respectively. Furthermore, nitrosylation studies with S-nitrosocysteine followed by immunoblotting with anti SNO-cysteine demonstrated a novel and biologically relevant post translational modification of thiols of CYB5A in HCC specimens only. Immunofluorescence images demonstrated increased protein S-nitrosylation signals in the tumor cells and fibrotic region of HCC tissues. The two other nuclear membrane proteins which were only found to be nitrosylated in case of HCC were up regulated ATP synthase subunit beta (ATPB) and down regulated HBB. The decrease in expression of CYB5A in HCC suggests their possible role in disease progression. Further insight of the functional association of the identified proteins was obtained through KEGG/ REACTOME pathway analysis databases. String 8.3 interaction network shows strong interactions with proteins at high confidence score, which is helpful in characterization of functional abnormalities that may be a causative factor of liver pathology.
   Conclusion: These findings may have broader implications for understanding the mechanism of development of carcinoma. However, large scale studies will be required for further verification of their critical role in development and progression of HCC.
C1 [Khan, Rizma; Zahid, Saadia; Ahmed, Nikhat] Univ Karachi, Dept Biochem, Neurochem Res Unit Lab, Karachi, Pakistan.
   [Wan, Yu-Jui Yvonne; Forster, Jameson; Karim, A-Bashar Abdul; Nawabi, Atta M.] Univ Kansas, Med Ctr, Kansas City, KS 66103 USA.
   [Azhar, Abid; Rahman, M. Ataur] Univ Karachi, KIBGE, Karachi, Pakistan.
RP Ahmed, N (corresponding author), Univ Karachi, Dept Biochem, Neurochem Res Unit Lab, Karachi, Pakistan.
EM nikhat_ahmed14@yahoo.co.uk
OI Khan, Rizma/0000-0001-7259-4037
FU Higher Education Commission (HEC), PakistanHigher Education Commission
   of Pakistan [725]
FX The authors gratefully acknowledged excellent technical assistance and
   expert opinion regarding ESI-QTOF MS/MS provided by AR Asif (Department
   of Clinical Chemistry, University Medical Center Goettingen, Goettingen,
   Germany) and the working facility provided by KIBGE, University of
   Karachi. The work was fully supported by the Higher Education Commission
   (HEC), Pakistan Grant No. 725 to MA. R and N A.
CR ABE K, 1985, J BIOCHEM, V97, P1659, DOI 10.1093/oxfordjournals.jbchem.a135224
   Asif AR, 2010, ELECTROPHORESIS, V31, P1947, DOI 10.1002/elps.201000015
   Berg T, 2006, GASTROENTEROLOGY, V130, P1086, DOI 10.1053/j.gastro.2006.02.015
   Blanc M, 2011, PLOS BIOL, V9, DOI 10.1371/journal.pbio.1000598
   BLUM H, 1987, ELECTROPHORESIS, V8, P93, DOI 10.1002/elps.1150080203
   Bogdan C, 2001, NAT IMMUNOL, V2, P907, DOI 10.1038/ni1001-907
   Chan Daniel W., 2005, Journal of Clinical Ligand Assay, V28, P35
   DIBISCEGLIE AM, 1994, J CLIN GASTROENTEROL, V19, P222, DOI 10.1097/00004836-199410000-00011
   Dumpis U, 2003, J MED VIROL, V69, P331, DOI 10.1002/jmv.10293
   Dunn TM, 1998, YEAST, V14, P311, DOI 10.1002/(SICI)1097-0061(19980315)14:4<311::AID-YEA220>3.0.CO;2-B
   El-Serag HB, 1999, NEW ENGL J MED, V340, P745, DOI 10.1056/NEJM199903113401001
   Finn RD, 2011, TRANSGENIC RES, V20, P491, DOI 10.1007/s11248-010-9426-1
   Foster MW, 2009, TRENDS MOL MED, V15, P391, DOI 10.1016/j.molmed.2009.06.007
   Fukumura D, 2006, NAT REV CANCER, V6, P521, DOI 10.1038/nrc1910
   Gan L, 2009, DRUG METAB DISPOS, V37, P90, DOI 10.1124/dmd.108.023424
   Gaston B, 2006, AM J RESP CRIT CARE, V173, P1186, DOI 10.1164/rccm.200510-1584PP
   GUIARD B, 1974, P NATL ACAD SCI USA, V71, P2539, DOI 10.1073/pnas.71.6.2539
   GUIARD B, 1977, EUR J BIOCHEM, V74, P181, DOI 10.1111/j.1432-1033.1977.tb11379.x
   Hanash SM, 2000, ELECTROPHORESIS, V21, P1202, DOI 10.1002/(SICI)1522-2683(20000401)21:6<1202::AID-ELPS1202>3.0.CO;2-I
   Hess DT, 2005, NAT REV MOL CELL BIO, V6, P150, DOI 10.1038/nrm1569
   Hussain SP, 2000, P NATL ACAD SCI USA, V97, P12770, DOI 10.1073/pnas.220416097
   Jensen LJ, 2009, NUCLEIC ACIDS RES, V37, pD412, DOI 10.1093/nar/gkn760
   KEYES SR, 1979, J BIOL CHEM, V254, P7778
   Lee TY, 2011, PLOS ONE, V6, DOI 10.1371/journal.pone.0021849
   Lewis DFV, 2008, EXPERT OPIN DRUG MET, V4, P1181, DOI [10.1517/17425255.4.9.1181, 10.1517/17425255.4.9.1181 ]
   Liu LP, 2002, CANCER RES, V62, P3037
   Llovet JM, 2003, LANCET, V362, P1907, DOI 10.1016/S0140-6736(03)14964-1
   Majano PL, 1998, J CLIN INVEST, V101, P1343, DOI 10.1172/JCI774
   Marquardt JU, 2012, DEUT MED WOCHENSCHR, V137, P855, DOI 10.1055/s-0032-1304843
   Miller WL, 2011, ENDOCR REV, V32, P81, DOI 10.1210/er.2010-0013
   Minguez B, 2011, DIS MARKERS, V31, P181, DOI [10.3233/DMA-2011-0841, 10.1155/2011/310675]
   Okuda K, 2000, J HEPATOL, V32, P225, DOI 10.1016/S0168-8278(00)80428-6
   Pandey AV, 2005, J BIOL CHEM, V280, P13265, DOI 10.1074/jbc.M414673200
   Pedrazzini E, 2000, J CELL BIOL, V148, P899, DOI 10.1083/jcb.148.5.899
   Porter TD, 2002, J BIOCHEM MOL TOXIC, V16, P311, DOI 10.1002/jbt.10052
   Rahman MA, 2001, CLIN CANCER RES, V7, P1325
   Reymond MA, 1997, ELECTROPHORESIS, V18, P2842, DOI 10.1002/elps.1150181520
   Schenkman JB, 2003, PHARMACOL THERAPEUT, V97, P139, DOI 10.1016/S0163-7258(02)00327-3
   Seow TK, 2001, PROTEOMICS, V1, P1249
   Shevchenko A, 1996, ANAL CHEM, V68, P850, DOI 10.1021/ac950914h
   Shin BK, 2002, J MAMMARY GLAND BIOL, V7, P407, DOI 10.1023/A:1024038132381
   Song PP, 2012, LIVER INT, V32, P1053, DOI 10.1111/j.1478-3231.2012.02792.x
   Song YP, 2006, PROTEOMICS, V6, P5269, DOI 10.1002/pmic.200500893
   Steel LF, 2001, DIS MARKERS, V17, P179, DOI 10.1155/2001/963023
   Stringer RA, 2009, DRUG METAB DISPOS, V37, P1025, DOI 10.1124/dmd.108.024810
   TAKEMATSU H, 1994, J BIOCHEM-TOKYO, V115, P381, DOI 10.1093/oxfordjournals.jbchem.a124347
   Tazi EM, 2011, N AM J MED SCI, V3, P167, DOI 10.4297/najms.2011.3167
   Wai PY, 2012, WORLD J CLIN ONCOL, V3, P15, DOI 10.5306/wjco.v3.i2.15
   Wei W, 2010, SCI TRANSL MED, V2, DOI 10.1126/scitranslmed.3000328
   Yamazaki H, 2002, PROTEIN EXPRES PURIF, V24, P329, DOI 10.1006/prep.2001.1578
   Yantsevich AV, 2008, BIOCHEMISTRY-MOSCOW+, V73, P1096, DOI 10.1134/S0006297908100052
   Zhang B, 2005, NUCLEIC ACIDS RES, V33, pW741, DOI 10.1093/nar/gki475
   Zhang Z, 2005, BIOMARK PREVENT, V14, P2283
   Zhou G, 2002, MOL CELL PROTEOMICS, V1, P117, DOI 10.1074/mcp.M100015-MCP200
NR 54
TC 12
Z9 12
U1 0
U2 7
PU BMC
PI LONDON
PA CAMPUS, 4 CRINAN ST, LONDON N1 9XW, ENGLAND
SN 1542-6416
EI 1559-0275
J9 CLIN PROTEOM
JI Clin. Proteom.
PY 2013
VL 10
AR 6
DI 10.1186/1559-0275-10-6
PG 12
WC Biochemical Research Methods
WE Science Citation Index Expanded (SCI-EXPANDED)
SC Biochemistry & Molecular Biology
GA V42YQ
UT WOS:000209649500016
PM 23724895
OA Green Published, gold
DA 2022-04-10
ER

PT J
AU Olsen, RJ
   Hinrichs, SH
AF Olsen, RJ
   Hinrichs, SH
TI Phosphorylation of the EWS IQ domain regulates transcriptional activity
   of the EWS/ATF1 and EWS/FLI1 fusion proteins
SO ONCOGENE
LA English
DT Article
DE sarcoma; fusion protein; phosphorylation; IQ domain; EWS/ATF1; EWS/FLI1
ID CLEAR-CELL-SARCOMA; DNA-BINDING; CHIMERIC TRANSCRIPTS;
   MALIGNANT-MELANOMA; KINASE-C; TRANSLOCATION; INHIBITION; REQUIRES;
   TRANSACTIVATION; EWS-FLI-1
AB Specific chromosomal translocations are commonly present in mesenchymal tumors and frequently involve genes encoding transcription factor, The combination of different domains from unrelated genes results in chimeric proteins belie, ed to play a key role in the neoplastic process. The EWS/ATF1 and EWS/FLI1 fusion proteins associated with Clear Cell Sarcoma and Ewing's Sarcoma, respectively, were utilized to study the comparative effect of the EWS component on two different DNA binding partners. A potential regulatory site within the EWS IQ domain at serine266 was identified, and studies were performed to demonstrate that EWS is phosphorylated in cells and phosphorylation of serine266 regulates transcriptional activity. Mutational analysis showed that elimination of phosphorylation significantly reduced DNA binding activity by EMSA and reporter activation in luciferase assays, whereas phosphorylation mimicry resulted in a partial restoration to wild-type levels. Phosphorylation was also observed to mediate cellular compartmentalization. These studies confirm that IQ domain phosphorylation regulates the transcriptional activity of exogenous EWS/ATF1 and EWS/FLI1 and suggests that post-translational modification may potentiate the neoplastic behavior of fusion proteins in general. Since the IQ domain is incorporated into only a subset of fusion transcripts, these findings may provide insight into the molecular mechanism underlying clinical heterogeneity observed in Ewing's sarcoma.
C1 Univ Nebraska, Med Ctr, Dept Pathol & Microbiol, Omaha, NE 69198 USA.
RP Hinrichs, SH (corresponding author), Univ Nebraska, Med Ctr, Dept Pathol & Microbiol, Omaha, NE 69198 USA.
CR BAILLY RA, 1994, MOL CELL BIOL, V14, P3230, DOI 10.1128/MCB.14.5.3230
   Bassuk AG, 1997, ADV IMMUNOL, V64, P65, DOI 10.1016/S0065-2776(08)60887-1
   Bertolotti A, 1998, MOL CELL BIOL, V18, P1489, DOI 10.1128/MCB.18.3.1489
   Bosilevac JM, 1998, J BIOL CHEM, V273, P16874, DOI 10.1074/jbc.273.27.16874
   Bosilevac JM, 1999, J BIOL CHEM, V274, P34811, DOI 10.1074/jbc.274.49.34811
   BRIDGE JA, 1991, CANCER GENET CYTOGEN, V52, P101, DOI 10.1016/0165-4608(91)90059-4
   BRIDGE JA, 1990, AM J CLIN PATHOL, V93, P26, DOI 10.1093/ajcp/93.1.26
   Bridge Julia A., 1996, Current Opinion in Oncology, V8, P284
   Caponigro F, 1997, ANTI-CANCER DRUG, V8, P26, DOI 10.1097/00001813-199701000-00003
   de Alava E, 1998, J CLIN ONCOL, V16, P1248, DOI 10.1200/JCO.1998.16.4.1248
   Deloulme JC, 1997, J BIOL CHEM, V272, P27369, DOI 10.1074/jbc.272.43.27369
   Dohjima T, 2000, BRIT J CANCER, V82, P16, DOI 10.1054/bjoc.1998.0870
   FONTES JD, 1993, J VIROL, V67, P4436, DOI 10.1128/JVI.67.7.4436-4441.1993
   Fujimura Y, 1996, ONCOGENE, V12, P159
   GILCHRIST C, 1995, J BIOCH SCI, V3, P96
   Gilchrist CA, 1995, ANTIBODY IMMUNOCONJ, V8, P281
   GONZALEZ GA, 1989, CELL, V59, P675, DOI 10.1016/0092-8674(89)90013-5
   HUNTER T, 1992, CELL, V70, P375, DOI 10.1016/0092-8674(92)90162-6
   Jean D, 2000, ONCOGENE, V19, P2721, DOI 10.1038/sj.onc.1203569
   Johnson TK, 1999, J BIOL CHEM, V274, P36741, DOI 10.1074/jbc.274.51.36741
   LADANYI M, 1995, DIAGN MOL PATHOL, V4, P162, DOI 10.1097/00019606-199509000-00003
   Lam PYP, 1999, MOL CELL BIOL, V19, P594
   Li KKC, 1998, ONCOGENE, V16, P1325, DOI 10.1038/sj.onc.1201649
   Lin PP, 1999, CANCER RES, V59, P1428
   MAY WA, 1993, P NATL ACAD SCI USA, V90, P5752, DOI 10.1073/pnas.90.12.5752
   ORTEN DJ, 1994, J BIOL CHEM, V269, P32254
   Pan S, 1998, ONCOGENE, V16, P1625, DOI 10.1038/sj.onc.1201671
   Petermann R, 1998, ONCOGENE, V17, P603, DOI 10.1038/sj.onc.1201964
   SARKAR G, 1990, BIOTECHNIQUES, V8, P404
   ZHAO LJ, 1992, P NATL ACAD SCI USA, V89, P7070, DOI 10.1073/pnas.89.15.7070
   Zoubek A, 1996, J CLIN ONCOL, V14, P1245, DOI 10.1200/JCO.1996.14.4.1245
   ZOUBEK A, 1994, BRIT J CANCER, V70, P908, DOI 10.1038/bjc.1994.419
NR 32
TC 22
Z9 23
U1 0
U2 1
PU NATURE PUBLISHING GROUP
PI LONDON
PA MACMILLAN BUILDING, 4 CRINAN ST, LONDON N1 9XW, ENGLAND
SN 0950-9232
EI 1476-5594
J9 ONCOGENE
JI Oncogene
PD MAR 29
PY 2001
VL 20
IS 14
BP 1756
EP 1764
DI 10.1038/sj.onc.1204268
PG 9
WC Biochemistry & Molecular Biology; Oncology; Cell Biology; Genetics &
   Heredity
WE Science Citation Index Expanded (SCI-EXPANDED)
SC Biochemistry & Molecular Biology; Oncology; Cell Biology; Genetics &
   Heredity
GA 415YJ
UT WOS:000167750900008
PM 11313922
DA 2022-04-10
ER

PT J
AU Subramanian, D
   Griffith, JD
AF Subramanian, D
   Griffith, JD
TI Interactions between p53, hMSH2-hMSH6 and HMG I(Y) on Holliday junctions
   and bulged bases
SO NUCLEIC ACIDS RESEARCH
LA English
DT Article
ID DAMAGE RESPONSE pathway; CISPLATIN-MODIFIED DNA; C-TERMINAL DOMAIN;
   HOMOLOGOUS RECOMBINATION; MISMATCHED NUCLEOTIDES; P53-MEDIATED
   APOPTOSIS; CHROMOSOMAL-PROTEINS; ESCHERICHIA-COLI; MOLECULAR SWITCH;
   BINDING
AB The ability of the tumor suppressor protein, p53, to recognize certain types of DNA lesions may represent one of the mechanism by which this protein modulates cellular response to DNA damage. p53 DNA binding properties are regulated by several factors, such as post-translational modification including phosphorylation and acetylation, regulation by its own C-terminal domain and interactions with other cellular proteins. Substrates resembling Holliday junctions and extra base bulges were used to study the effect of three nuclear proteins, HMG-1, HMG I(Y) and hMSH2-hMSH6, on the lesion binding properties of p53. Gel retardation assays revealed that the three proteins had varying effects on p53 binding to these substrates. HMG-1 did not influence p53 binding to Holliday junctions or 3-cytosine bulges. HMG I(Y) rapidly dissociated p53 complexes with Holliday junctions but not 3-cytosine bulges. Finally, the mismatch repair protein complex, hMSH2-hMSH6, enhanced p53 binding to both substrates by 3-4-fold. Together, these results demonstrate that p53 DNA binding activity is highly influenced by the presence of other proteins, some having a dominant effect while others have a negative effect.
C1 Univ N Carolina, Lineberger Comprehens Canc Ctr, Chapel Hill, NC 27599 USA.
   Univ N Carolina, Dept Microbiol & Immunol, Chapel Hill, NC 27599 USA.
RP Griffith, JD (corresponding author), Univ N Carolina, Lineberger Comprehens Canc Ctr, CB 7295 Mason Farm Rd, Chapel Hill, NC 27599 USA.
EM jdg@med.unc.edu
FU NATIONAL CANCER INSTITUTEUnited States Department of Health & Human
   ServicesNational Institutes of Health (NIH) - USANIH National Cancer
   Institute (NCI) [R01CA070343] Funding Source: NIH RePORTER; NATIONAL
   INSTITUTE OF GENERAL MEDICAL SCIENCESUnited States Department of Health
   & Human ServicesNational Institutes of Health (NIH) - USANIH National
   Institute of General Medical Sciences (NIGMS) [R01GM031819] Funding
   Source: NIH RePORTER; NCI NIH HHSUnited States Department of Health &
   Human ServicesNational Institutes of Health (NIH) - USANIH National
   Cancer Institute (NCI) [CA70343] Funding Source: Medline; NIGMS NIH
   HHSUnited States Department of Health & Human ServicesNational
   Institutes of Health (NIH) - USANIH National Institute of General
   Medical Sciences (NIGMS) [R01 GM031819, GM31819] Funding Source: Medline
CR ADACHI Y, 1990, J CHROMATOGR-BIOMED, V530, P39, DOI 10.1016/S0378-4347(00)82300-2
   Alani E, 1997, J MOL BIOL, V265, P289, DOI 10.1006/jmbi.1996.0743
   Bagga R, 2000, NUCLEIC ACIDS RES, V28, P2541, DOI 10.1093/nar/28.13.2541
   BAKALKIN G, 1995, NUCLEIC ACIDS RES, V23, P362, DOI 10.1093/nar/23.3.362
   BATES H, 1989, J BACTERIOL, V171, P2480, DOI 10.1128/jb.171.5.2480-2484.1989
   BIANCHI ME, 1989, SCIENCE, V243, P1056, DOI 10.1126/science.2922595
   Bustin M, 1996, PROG NUCLEIC ACID RE, V54, P35, DOI 10.1016/S0079-6603(08)60360-8
   CLAUS P, 1994, J BIOL CHEM, V269, P33042
   Degtyareva N, 2001, J BIOL CHEM, V276, P8778, DOI 10.1074/jbc.M006795200
   Dudenhoffer C, 1998, MOL CELL BIOL, V18, P5332, DOI 10.1128/MCB.18.9.5332
   FISHEL R, 1994, CANCER RES, V54, P5539
   Gradia S, 2000, J BIOL CHEM, V275, P3922, DOI 10.1074/jbc.275.6.3922
   Gradia S, 1997, CELL, V91, P995, DOI 10.1016/S0092-8674(00)80490-0
   HALAZONETIS TD, 1993, EMBO J, V12, P1021, DOI 10.1002/j.1460-2075.1993.tb05743.x
   Hill DA, 1997, NUCLEIC ACIDS RES, V25, P3523, DOI 10.1093/nar/25.17.3523
   HUPP TR, 1992, CELL, V71, P875, DOI 10.1016/0092-8674(92)90562-Q
   Imamura T, 2001, J BIOL CHEM, V276, P7534, DOI 10.1074/jbc.M008143200
   ISHIZAKI K, 1994, INT J CANCER, V58, P254, DOI 10.1002/ijc.2910580218
   Jayaraman L, 1998, GENE DEV, V12, P462, DOI 10.1101/gad.12.4.462
   JAYARAMAN L, 1995, CELL, V81, P1021, DOI 10.1016/S0092-8674(05)80007-8
   Jayaraman L, 1997, GENE DEV, V11, P558, DOI 10.1101/gad.11.5.558
   Jayaraman L, 1999, CELL MOL LIFE SCI, V55, P76, DOI 10.1007/s000180050271
   Kaeser MD, 2002, P NATL ACAD SCI USA, V99, P95, DOI 10.1073/pnas.012283399
   KASTAN MB, 1991, CANCER RES, V51, P6304
   Ko LJ, 1996, GENE DEV, V10, P1054, DOI 10.1101/gad.10.9.1054
   Kuhn C, 1999, ONCOGENE, V18, P769, DOI 10.1038/sj.onc.1202327
   LEE S, 1995, CELL, V81, P1013, DOI 10.1016/S0092-8674(05)80006-6
   Lee SM, 1997, J BIOL CHEM, V272, P7532, DOI 10.1074/jbc.272.11.7532
   Levine AJ, 1997, CELL, V88, P323, DOI 10.1016/S0092-8674(00)81871-1
   LI R, 1993, CELL, V73, P1207, DOI 10.1016/0092-8674(93)90649-B
   Liu YG, 2001, CARCINOGENESIS, V22, P851, DOI 10.1093/carcin/22.6.851
   LOCKER D, 1995, J MOL BIOL, V246, P243, DOI 10.1006/jmbi.1994.0079
   Marsischky GT, 1999, J BIOL CHEM, V274, P7200, DOI 10.1074/jbc.274.11.7200
   McLure KG, 1998, EMBO J, V17, P3342, DOI 10.1093/emboj/17.12.3342
   NELSON WG, 1994, MOL CELL BIOL, V14, P1815, DOI 10.1128/MCB.14.3.1815
   NISSEN MS, 1995, J BIOL CHEM, V270, P4355, DOI 10.1074/jbc.270.9.4355
   NISSEN MS, 1991, J BIOL CHEM, V266, P19945
   ONATE SA, 1994, MOL CELL BIOL, V14, P3376, DOI 10.1128/MCB.14.5.3376
   Oren M, 1999, CELL MOL LIFE SCI, V55, P9, DOI 10.1007/s000180050265
   PICKSLEY SM, 1990, J MOL BIOL, V212, P723, DOI 10.1016/0022-2836(90)90233-C
   Pohler JRG, 1998, EMBO J, V17, P817, DOI 10.1093/emboj/17.3.817
   RAYSSIGUIER C, 1989, NATURE, V342, P396, DOI 10.1038/342396a0
   READ CM, 1993, NUCLEIC ACIDS RES, V21, P3427, DOI 10.1093/nar/21.15.3427
   REEVES R, 1993, J BIOL CHEM, V268, P21137
   Sakaguchi K, 1998, GENE DEV, V12, P2831, DOI 10.1101/gad.12.18.2831
   Spillare EA, 1999, GENE DEV, V13, P1355, DOI 10.1101/gad.13.11.1355
   Sturzbecher HW, 1996, EMBO J, V15, P1992, DOI 10.1002/j.1460-2075.1996.tb00550.x
   Wang XW, 1996, GENE DEV, V10, P1219, DOI 10.1101/gad.10.10.1219
   WEIR HM, 1993, EMBO J, V12, P1311, DOI 10.1002/j.1460-2075.1993.tb05776.x
   WU L, 1995, MOL CELL BIOL, V15, P497, DOI 10.1128/MCB.15.1.497
NR 50
TC 33
Z9 35
U1 0
U2 1
PU OXFORD UNIV PRESS
PI OXFORD
PA GREAT CLARENDON ST, OXFORD OX2 6DP, ENGLAND
SN 0305-1048
EI 1362-4962
J9 NUCLEIC ACIDS RES
JI Nucleic Acids Res.
PD JUN 1
PY 2002
VL 30
IS 11
BP 2427
EP 2434
DI 10.1093/nar/30.11.2427
PG 8
WC Biochemistry & Molecular Biology
WE Science Citation Index Expanded (SCI-EXPANDED)
SC Biochemistry & Molecular Biology
GA 563LE
UT WOS:000176256500019
PM 12034830
OA Green Published
DA 2022-04-10
ER

PT J
AU Bonacci, T
   Audebert, S
   Camoin, L
   Baudelet, E
   Bidaut, G
   Garcia, M
   Witzel, II
   Perkins, ND
   Borg, JP
   Iovanna, JL
   Soubeyran, P
AF Bonacci, Thomas
   Audebert, Stephane
   Camoin, Luc
   Baudelet, Emilie
   Bidaut, Ghislain
   Garcia, Maxime
   Witzel, Ini-Isabee
   Perkins, Neil D.
   Borg, Jean-Paul
   Iovanna, Juan-Lucio
   Soubeyran, Philippe
TI Identification of New mechanism of Cellular Response to Chemotherapy by
   Tracking Changes in post-translational modification by ubiquitinationand
   Ubiquitin-Like Proteins
SO JOURNAL OF PROTEOME RESEARCH
LA English
DT Article
DE pancreatic cancer; anticancer drugs resistance; gemcitabine; stress
   response; post-translationnal modification; ubiquitin; ubiquitin-like
   proteins; Nedd8; SUMO1
ID MOLECULAR INTERACTION DATABASE; TARGET; NEDD8; ubiquitination; MODIFIER;
   SITES; CELLS
AB Pancreatic ductal adenocarcinoma (PDAC) is a very aggressive malignancy characterized by an excessive resistance to all known anticancer therapies, a still largely elusive phenomenon. To identify original mechanism, we have explored the role of post-translational modification (PTMs) mediated by members of the ubiquitinationfamily. Although alterations of these pathway have been reported in different cancers, no methodical search for these kinds of anomalies has been performed so far. Therefore, we studied the ubiquitin-, Nedd8-, and SUMO1-specific proteomes of a pancreatic cancer cell line (MiaPaCa-2) and identified changes induced by gemcitabine, the standard PDAC's chemotherapeutic drug. These PTMs profiles contained both known major substrates of all three modifiers as well as original ones. Gemcitabine treatment altered the PTM profile of proteins involved in various biological functions, some known cancer associated genes, many potentially cancer-associated genes, and several cancer-signaling networks, including canonical and noncanonical WNT and PI3K/Akt/MTOR pathway. Some of these altered PTMs formed groups of functionally and physically associated proteins. Importantly, we could validate the gemcitabine-induced PTMs variations of relevant candidates and we could demonstrate the biological significance of such altered PTMs by studying in detail the sumoylation of SNIP!, one of these new target.
C1 [Bonacci, Thomas; Audebert, Stephane; Camoin, Luc; Baudelet, Emilie; Bidaut, Ghislain; Garcia, Maxime; Borg, Jean-Paul; Iovanna, Juan-Lucio; Soubeyran, Philippe] Aix Marseille Univ, CRCM, Inst J Paoli I Calmettes, CNRS,UMR7258,INSERM,U1068,UM105, F-13009 Marseille, France.
   [Witzel, Ini-Isabee; Perkins, Neil D.] Newcastle Univ, Sch Med, Inst Cell & Mol Biosci, Newcastle Upon Tyne NE2 4HH, Tyne & Wear, England.
RP Soubeyran, P (corresponding author), Aix Marseille Univ, CRCM, Inst J Paoli I Calmettes, CNRS,UMR7258,INSERM,U1068,UM105, 163 Av Luminy, F-13009 Marseille, France.
EM philippe.soubeyran@inserm.fr
RI Soubeyran, Philippe/P-1758-2018; Garcia, Maxime/L-8081-2019; Iovanna,
   Juan/M-9805-2017; Camoin, Luc/AAB-3856-2019; Borg,
   Jean-Paul/AAX-8096-2020
OI Garcia, Maxime/0000-0003-2827-9261; Iovanna, Juan/0000-0003-1822-2237;
   Camoin, Luc/0000-0002-1230-4787; Borg, Jean-Paul/0000-0001-8418-3382;
   Soubeyran, Philippe/0000-0002-5876-3217; Audebert,
   Stephane/0000-0002-9409-2588; Bidaut, Ghislain/0000-0001-8502-2361
FU INSERMInstitut National de la Sante et de la Recherche Medicale
   (Inserm)European Commission; INCAInstitut National du Cancer (INCA)
   France; La Ligue Contre le CancerLigue nationale contre le cancer;
   Canceropole PACARegion Grand-Est; PACA regionRegion Provence-Alpes-Cote
   d'Azur; Cancer Research U.K. Ph.D. studentshipCancer Research UK
   [C1443/A6721]
FX We thank Prof. Ronald T. Hay for His-tagged SUMO1 and SUMO2, Dr. Cedric
   Raoul for empty pCCL-WPS-PGK vector, Dr. Cedric Malicet for introducing
   the multicloning site, Pierre-Henri Gaillard, Jean-Hugues Guervilly, and
   Sarah Scaglione for anti-GST and anti-SUMO2 antibodies, and Laurence
   Borge and the cell culture platform (CRCM, Unite 1068) for technical
   assistance. This work was supported by grants from INSERM, INCA, and La
   Ligue Contre le Cancer. T.B. was supported by a fellowship from La Ligue
   contre le Cancer. E.B. was supported by Canceropole PACA. M.G. was
   supported by a fellowship from INSERM and PACA region. I.-I.W. was
   supported by a Cancer Research U.K. Ph.D. studentship (C1443/A6721). The
   Marseille Proteomic facility (MaP; http://map.univmed.fr/) is supported
   by IBiSA (Infrastructures Biologie Sante et Agronomie), Canceropole
   PACA, Region PACA, and Institut Paoli-Calmettes. J.-P.B. is member of
   Institut Universitaire de France.
CR Blake JA, 2013, NUCLEIC ACIDS RES, V41, pD530, DOI 10.1093/nar/gks1050
   Blomster HA, 2010, J BIOL CHEM, V285, P19324, DOI 10.1074/jbc.M110.106955
   Bonacci T, 2010, THESCIENTIFICWORLDJO, V10, P1462, DOI 10.1100/tsw.2010.133
   Bracken CP, 2008, CANCER RES, V68, P7621, DOI 10.1158/0008-5472.CAN-08-1217
   Coleman MP, 2003, ANN ONCOL, V14, pV128, DOI 10.1093/annonc/mdg756
   Danielsen JMR, 2011, MOL CELL PROTEOMICS, V10, DOI 10.1074/mcp.M110.003590
   Emanuele MJ, 2011, CELL, V147, P459, DOI 10.1016/j.cell.2011.09.019
   Fujii M, 2006, MOL CELL, V24, P771, DOI 10.1016/j.molcel.2006.11.006
   Garcia M, 2012, BIOINFORMATICS, V28, P672, DOI 10.1093/bioinformatics/bts025
   Giroux V, 2006, CLIN CANCER RES, V12, P235, DOI 10.1158/1078-0432.CCR-05-1700
   Goel R, 2012, MOL BIOSYST, V8, P453, DOI 10.1039/c1mb05340j
   Herrmann J, 2007, CIRC RES, V100, P1276, DOI 10.1161/01.RES.0000264500.11888.f0
   Hietakangas V, 2006, P NATL ACAD SCI USA, V103, P45, DOI 10.1073/pnas.0503698102
   Hochstrasser M, 2009, NATURE, V458, P422, DOI 10.1038/nature07958
   Hoeller D, 2009, NATURE, V458, P438, DOI 10.1038/nature07960
   Jemal A, 2010, CA-CANCER J CLIN, V60, P277, DOI 10.3322/caac.20073
   Jones J, 2008, J PROTEOME RES, V7, P1274, DOI 10.1021/pr700749v
   Kerrien S, 2012, NUCLEIC ACIDS RES, V40, pD841, DOI 10.1093/nar/gkr1088
   Kim W, 2011, MOL CELL, V44, P325, DOI 10.1016/j.molcel.2011.08.025
   Kirkpatrick DS, 2005, PROTEOMICS, V5, P2104, DOI 10.1002/pmic.200401089
   Krueger KE, 2006, MOL CELL PROTEOMICS, V5, P1799, DOI 10.1074/mcp.R600009-MCP200
   Licata L, 2012, NUCLEIC ACIDS RES, V40, pD857, DOI 10.1093/nar/gkr930
   Lopitz-Otsoa F, 2012, J PROTEOMICS, V75, P2998, DOI 10.1016/j.jprot.2011.12.001
   Low TY, 2013, PROTEOMICS, V13, P526, DOI 10.1002/pmic.201200244
   Matafora V, 2009, MOL CELL PROTEOMICS, V8, P2243, DOI 10.1074/mcp.M900079-MCP200
   Meierhofer D, 2008, J PROTEOME RES, V7, P4566, DOI 10.1021/pr800468j
   Na CH, 2012, J PROTEOME RES, V11, P4722, DOI 10.1021/pr300536k
   Neoptolemos JP, 2004, NEW ENGL J MED, V350, P1200, DOI 10.1056/NEJMoa032295
   Nijman SMB, 2005, CELL, V123, P773, DOI 10.1016/j.cell.2005.11.007
   Peng JM, 2003, NAT BIOTECHNOL, V21, P921, DOI 10.1038/nbt849
   Perez-Mancera PA, 2012, NATURE, V486, P266, DOI 10.1038/nature11114
   Pickart CM, 2004, BBA-MOL CELL RES, V1695, P55, DOI 10.1016/j.bbamcr.2004.09.019
   Povlsen LK, 2012, NAT CELL BIOL, V14, P1089, DOI 10.1038/ncb2579
   Roche KC, 2007, ONCOGENE, V26, P4523, DOI 10.1038/sj.onc.1210233
   Shevchenko A, 1996, ANAL CHEM, V68, P850, DOI 10.1021/ac950914h
   Shi Y., 2011, OMICS, V10
   Vertegaal ACO, 2006, MOL CELL PROTEOMICS, V5, P2298, DOI 10.1074/mcp.M600212-MCP200
   Vertegaal ACO, 2011, CHEM REV, V111, P7923, DOI 10.1021/cr200187e
   Wagner SA, 2012, MOL CELL PROTEOMICS, V11, P1578, DOI 10.1074/mcp.M112.017905
   Wagner SA, 2011, MOL CELL PROTEOMICS, V10, DOI 10.1074/mcp.M111.013284
   Westman BJ, 2010, MOL CELL, V39, P618, DOI 10.1016/j.molcel.2010.07.025
   Xenarios I, 2000, NUCLEIC ACIDS RES, V28, P289, DOI 10.1093/nar/28.1.289
   Xirodimas DP, 2008, EMBO REP, V9, P280, DOI 10.1038/embor.2008.10
   Xirodimas DP, 2004, CELL, V118, P83, DOI 10.1016/j.cell.2004.06.016
   Xu GQ, 2010, NAT BIOTECHNOL, V28, P868, DOI 10.1038/nbt.1654
   Xue Y, 2008, MOL CELL PROTEOMICS, V7, P1598, DOI 10.1074/mcp.M700574-MCP200
   Zhang WW, 2011, FEBS LETT, V585, P2786, DOI 10.1016/j.febslet.2011.04.044
NR 47
TC 22
Z9 24
U1 0
U2 15
PU AMER CHEMICAL SOC
PI WASHINGTON
PA 1155 16TH ST, NW, WASHINGTON, DC 20036 USA
SN 1535-3893
EI 1535-3907
J9 J PROTEOME RES
JI J. Proteome Res.
PD MAY
PY 2014
VL 13
IS 5
BP 2478
EP 2494
DI 10.1021/pr401258d
PG 17
WC Biochemical Research Methods
WE Science Citation Index Expanded (SCI-EXPANDED)
SC Biochemistry & Molecular Biology
GA AG5WY
UT WOS:000335490600022
PM 24654937
DA 2022-04-10
ER

PT J
AU Sandy, Z
   da Costa, IC
   Schmidt, CK
AF Sandy, Zac
   da Costa, Isabelle Cristine
   Schmidt, Christine K.
TI More than Meets the ISG15: Emerging Roles in the DNA Damage Response and
   Beyond
SO BIOMOLECULES
LA English
DT Review
DE ubiquitin-like protein (UBL); ISG15 and ISGylation; UBA7 (UBEL1); EFP
   (TRIM25) and HERC5; USP18 (UBP43); DNA damage response (DDR); genome
   stability; p53 family members; DNA replication fork progression and
   translesion synthesis
ID UBIQUITIN-LIKE PROTEIN; STIMULATED GENE 15; cell cycle;
   HEPATOCELLULAR-CARCINOMA; STRUCTURAL INSIGHTS; CONJUGATING ENZYME;
   EXCISION-REPAIR; DOWN-REGULATION; MESSENGER-RNA; PML/RAR-ALPHA
AB Maintenance of genome stability is a crucial priority for any organism. To meet this priority, robust signalling networks exist to facilitate error-free DNA replication and repair. These signalling cascades are subject to various regulatory post-translational modification that range from simple additions of chemical moieties to the conjugation of ubiquitin-like proteins (UBLs). Interferon Stimulated Gene 15 (ISG15) is one such UBL. While classically thought of as a component of antiviral immunity, ISG15 has recently emerged as a regulator of genome stability, with key roles in the DNA damage response (DDR) to modulate p53 signalling and error-free DNA replication. Additional proteomic analyses and cancer-focused studies hint at wider-reaching, uncharacterised functions for ISG15 in genome stability. We review these recent discoveries and highlight future perspectives to increase our understanding of this multifaceted UBL in health and disease.
C1 [Sandy, Zac; da Costa, Isabelle Cristine; Schmidt, Christine K.] Univ Manchester, Fac Biol Med & Hlth, Manchester Canc Res Ctr, Div Canc Sci,Sch Med Sci, Manchester M20 4GJ, Lancs, England.
RP Schmidt, CK (corresponding author), Univ Manchester, Fac Biol Med & Hlth, Manchester Canc Res Ctr, Div Canc Sci,Sch Med Sci, Manchester M20 4GJ, Lancs, England.
EM zac.sandy@postgrad.manchester.ac.uk;
   isabellecristine.dacosta@manchester.ac.uk;
   christine.schmidt@manchester.ac.uk
RI Schmidt, Christine/AAF-2625-2021
OI Schmidt, Christine/0000-0002-8363-7933; Sandy, Zac/0000-0001-8481-7568
FU BBSRC AstraZeneca collaborative training partnership (CTP) studentship;
   University of Manchester President's Doctoral Scholar award; BBSRC David
   Phillips FellowshipUK Research & Innovation (UKRI)Biotechnology and
   Biological Sciences Research Council (BBSRC) [BB/N019997/1]; BBSRCUK
   Research & Innovation (UKRI)Biotechnology and Biological Sciences
   Research Council (BBSRC) [BB/N019997/1] Funding Source: UKRI
FX We acknowledge funding by a BBSRC AstraZeneca collaborative training
   partnership (CTP) studentship to Z.S., a University of Manchester
   President's Doctoral Scholar award to I.C.d.C., and a BBSRC David
   Phillips Fellowship to C.K.S. (grant number BB/N019997/1).
CR Aeby E, 2016, CELL REP, V17, P3107, DOI 10.1016/j.celrep.2016.11.071
   Andersen JB, 2006, BRIT J CANCER, V94, P1465, DOI 10.1038/sj.bjc.6603099
   Arimoto KI, 2008, MOL IMMUNOL, V45, P1078, DOI 10.1016/j.molimm.2007.07.021
   Bade VN, 2012, PLOS ONE, V7, DOI 10.1371/journal.pone.0038294
   Bajaj S, 2016, J BIOL CHEM, V291, P14231, DOI 10.1074/jbc.M116.731398
   Baker NA, 2001, P NATL ACAD SCI USA, V98, P10037, DOI 10.1073/pnas.181342398
   Bakos G, 2018, NAT COMMUN, V9, DOI 10.1038/s41467-018-07251-5
   Banerjee T, 2015, CURR BIOL, V25, P2830, DOI 10.1016/j.cub.2015.09.026
   Bank R. E., 2003, SIAM Review, V45, P291, DOI 10.1137/S003614450342061
   Bartova E, 2017, PROTOPLASMA, V254, P1233, DOI 10.1007/s00709-017-1090-3
   Basters A, 2014, FEBS J, V281, P1918, DOI 10.1111/febs.12754
   Bektas N, 2008, BREAST CANCER RES, V10, DOI 10.1186/bcr2117
   Berti M, 2013, NAT STRUCT MOL BIOL, V20, P347, DOI 10.1038/nsmb.2501
   Biswas K, 2017, MOL CANCER RES, V15, P651, DOI 10.1158/1541-7786.MCR-16-0466
   Blackford AN, 2017, MOL CELL, V66, P801, DOI 10.1016/j.molcel.2017.05.015
   Blasius M, 2013, CELL CYCLE, V12, P1162, DOI 10.4161/cc.24485
   Boehm EM, 2016, ENZYMES, V39, P231, DOI 10.1016/bs.enz.2016.03.003
   Brinkmann K, 2015, FRONT GENET, V6, DOI 10.3389/fgene.2015.00098
   Brown AR, 2015, CARCINOGENESIS, V36, P946, DOI 10.1093/carcin/bgv104
   Brown JS, 2015, OPEN BIOL, V5, DOI 10.1098/rsob.150018
   Bruninghoff K, 2020, ACS CHEM BIOL, V15, P2406, DOI 10.1021/acschembio.0c00609
   Burks J, 2014, ONCOGENE, V33, P794, DOI 10.1038/onc.2012.633
   Cai J, 2017, EXP CELL RES, V358, P315, DOI 10.1016/j.yexcr.2017.07.006
   Candi E, 2007, CELL CYCLE, V6, P274, DOI 10.4161/cc.6.3.3797
   Cappadocia L, 2018, CHEM REV, V118, P889, DOI 10.1021/acs.chemrev.6b00737
   Castelli M, 2013, ONCOGENE, V32, P3350, DOI 10.1038/onc.2012.353
   Castelli M, 2020, EMBO REP, V21, DOI 10.15252/embr.201948073
   Cekan P, 2016, MOL BIOL CELL, V27, P1346, DOI 10.1091/mbc.E16-01-0025
   Cerikan B, 2016, DEV CELL, V39, P28, DOI 10.1016/j.devcel.2016.08.020
   Chang HHY, 2017, NAT REV MOL CELL BIO, V18, P495, DOI 10.1038/nrm.2017.48
   Chang YG, 2008, J BIOL CHEM, V283, P13370, DOI 10.1074/jbc.M800162200
   Chen B, 2011, CSH PERSPECT BIOL, V3, DOI 10.1101/cshperspect.a004374
   Chen H, 2020, SCI ADV, V6, DOI 10.1126/sciadv.abb8941
   Chen H, 2013, MOL CELL BIOL, V33, P1139, DOI 10.1128/MCB.01191-12
   Chen T, 2015, ONCOGENE, V34, P4019, DOI 10.1038/onc.2014.332
   Chun JH, 2004, CANCER RES, V64, P4703, DOI 10.1158/0008-5472.CAN-04-1063
   Ciccia A, 2010, MOL CELL, V40, P179, DOI 10.1016/j.molcel.2010.09.019
   Cong XL, 2010, BLOOD CELL MOL DIS, V45, P103, DOI 10.1016/j.bcmd.2010.05.009
   Da Costa IC, 2020, ESSAYS BIOCHEM, V64, P737, DOI 10.1042/EBC20190095
   Daczkowski CM, 2017, J MOL BIOL, V429, P1661, DOI 10.1016/j.jmb.2017.04.011
   Dao CT, 2005, FRONT BIOSCI-LANDMRK, V10, P2701, DOI 10.2741/1730
   Dastur A, 2006, J BIOL CHEM, V281, P4334, DOI 10.1074/jbc.M512830200
   DCunha J, 1996, P NATL ACAD SCI USA, V93, P211, DOI 10.1073/pnas.93.1.211
   Dellaire G, 2006, J CELL BIOL, V175, P55, DOI 10.1083/jcb.200604009
   Dereeper A, 2008, NUCLEIC ACIDS RES, V36, pW465, DOI 10.1093/nar/gkn180
   Desai SD, 2006, CANCER RES, V66, P921, DOI 10.1158/0008-5472.CAN-05-1123
   Desai SD, 2008, MOL CANCER THER, V7, P1430, DOI 10.1158/1535-7163.MCT-07-2345
   Desai SD, 2015, ONCOIMMUNOLOGY, V4, DOI 10.1080/2162402X.2015.1052935
   Desai SD, 2013, J BIOL CHEM, V288, P2388, DOI 10.1074/jbc.M112.403832
   Desai SD, 2012, EXP BIOL MED, V237, P38, DOI 10.1258/ebm.2011.011236
   di Masi A, 2016, CELL DEATH DIS, V7, DOI 10.1038/cddis.2016.115
   dos Santos PF, 2018, J IMMUNOL, V200, P1434, DOI 10.4049/jimmunol.1701120
   dos Santos PF, 2017, J INTERF CYTOK RES, V37, P246, DOI 10.1089/jir.2016.0103
   Dou H, 2010, MOL CELL, V39, P333, DOI 10.1016/j.molcel.2010.07.021
   Du Y, 2018, EMBO J, V37, P351, DOI 10.15252/embj.201796781
   Duda DM, 2013, STRUCTURE, V21, P1030, DOI 10.1016/j.str.2013.04.019
   Durfee LA, 2008, J BIOL CHEM, V283, P23895, DOI 10.1074/jbc.M804069200
   Durfee LA, 2012, METHODS MOL BIOL, V832, P141, DOI 10.1007/978-1-61779-474-2_9
   Durfee LA, 2010, MOL CELL, V38, P722, DOI 10.1016/j.molcel.2010.05.002
   Dworak N, 2019, AGING CELL, V18, DOI 10.1111/acel.12851
   Dzimianski JV, 2019, J MOL BIOL, V431, P4203, DOI 10.1016/j.jmb.2019.03.013
   ELDEIRY WS, 1994, CANCER RES, V54, P1169
   Erdal E, 2017, GENE DEV, V31, P353, DOI 10.1101/gad.289769.116
   Falvey CM, 2017, ONCOTARGET, V8, P23479, DOI 10.18632/oncotarget.15182
   Fan JB, 2015, P NATL ACAD SCI USA, V112, P14313, DOI 10.1073/pnas.1505690112
   Fan JB, 2015, SCI REP-UK, V5, DOI 10.1038/srep12704
   FARRELL PJ, 1979, NATURE, V279, P523, DOI 10.1038/279523a0
   Feng Q, 2008, MOL CANCER THER, V7, P3780, DOI 10.1158/1535-7163.MCT-08-0753
   Forys JT, 2014, CELL REP, V7, P514, DOI 10.1016/j.celrep.2014.03.026
   Fu HW, 2020, MOL THER-ONCOLYTICS, V18, P126, DOI 10.1016/j.omto.2020.06.005
   Fukasawa T, 2015, CELL SIGNAL, V27, P1569, DOI 10.1016/j.cellsig.2015.04.013
   Gaillard H, 2015, NAT REV CANCER, V15, P276, DOI 10.1038/nrc3916
   Ganesan M, 2016, ALCOHOL CLIN EXP RES, V40, P2329, DOI 10.1111/acer.13226
   Gao YZ, 2017, GENES-BASEL, V8, DOI 10.3390/genes8020064
   Garvin AJ, 2017, PHILOS T R SOC B, V372, DOI 10.1098/rstb.2016.0281
   Gentile M, 2003, NUCLEIC ACIDS RES, V31, P4779, DOI 10.1093/nar/gkg675
   Ghosal G, 2013, TRANSL CANCER RES, V2, P107, DOI 10.3978/j.issn.2218-676X.2013.04.01
   Giannakopoulos NV, 2005, BIOCHEM BIOPH RES CO, V336, P496, DOI 10.1016/j.bbrc.2005.08.132
   GOLDSTEIN G, 1975, P NATL ACAD SCI USA, V72, P11, DOI 10.1073/pnas.72.1.11
   Gonzalo S, 2014, ADV EXP MED BIOL, V773, P377, DOI 10.1007/978-1-4899-8032-8_17
   Guo YL, 2010, CANCER RES, V70, P9875, DOI 10.1158/0008-5472.CAN-10-1100
   Gupta R, 2018, CELL, V173, P972, DOI 10.1016/j.cell.2018.03.050
   HAAS AL, 1987, J BIOL CHEM, V262, P11315
   Hafner A, 2019, NAT REV MOL CELL BIO, V20, P199, DOI 10.1038/s41580-019-0110-x
   Hanahan D, 2011, CELL, V144, P646, DOI 10.1016/j.cell.2011.02.013
   Hartmann-Petersen R, 2004, SEMIN CELL DEV BIOL, V15, P247, DOI 10.1016/j.semcdb.2003.12.006
   Haupt Y, 1997, NATURE, V387, P296, DOI 10.1038/387296a0
   Held T, 2021, EUR J IMMUNOL, V51, P138, DOI 10.1002/eji.202048646
   Hermann M, 2017, TRENDS IMMUNOL, V38, P79, DOI 10.1016/j.it.2016.11.001
   Herrmann J, 2007, CIRC RES, V100, P1276, DOI 10.1161/01.RES.0000264500.11888.f0
   Hirashima K, 2015, NUCLEIC ACIDS RES, V43, P2022, DOI 10.1093/nar/gkv063
   Hirashima K, 2013, MOL CELL BIOL, V33, P2988, DOI 10.1128/MCB.00136-13
   Hochstrasser M, 2009, NATURE, V458, P422, DOI 10.1038/nature07958
   Hodge CD, 2016, ONCOTARGET, V7, P64471, DOI 10.18632/oncotarget.10948
   Hoege C, 2002, NATURE, V419, P135, DOI 10.1038/nature00991
   Hoeller D, 2006, NAT REV CANCER, V6, P776, DOI 10.1038/nrc1994
   Hollingsworth J, 2018, NEOPLASIA, V20, P697, DOI 10.1016/j.neo.2018.05.005
   HOLST M, 1993, J COMPUT CHEM, V14, P105, DOI 10.1002/jcc.540140114
   Holst M, 2001, ADV COMPUT MATH, V15, P139, DOI 10.1023/A:1014246117321
   HOLST MJ, 1995, J COMPUT CHEM, V16, P337, DOI 10.1002/jcc.540160308
   Holthaus D, 2020, J IMMUNOL, V205, P261, DOI 10.4049/jimmunol.1901472
   Honda R, 1997, FEBS LETT, V420, P25, DOI 10.1016/S0014-5793(97)01480-4
   Huang YF, 2014, CELL CYCLE, V13, P2200, DOI 10.4161/cc.29209
   Huang YF, 2014, ONCOTARGET, V5, P5808, DOI 10.18632/oncotarget.2199
   Hummer BT, 2001, J VIROL, V75, P7774, DOI 10.1128/JVI.75.16.7774-7777.2001
   Huo Y, 2017, ONCOTARGET, V8, P107452, DOI 10.18632/oncotarget.22488
   Im E, 2016, OPEN BIOL, V6, DOI 10.1098/rsob.160193
   Ina S, 2010, PANCREAS, V39, P473, DOI 10.1097/MPA.0b013e3181c0decc
   Ismail IH, 2012, NUCLEIC ACIDS RES, V40, P5497, DOI 10.1093/nar/gks222
   Jachimowicz RD, 2019, CELL, V176, P505, DOI 10.1016/j.cell.2018.11.024
   Jackson SP, 2013, MOL CELL, V49, P795, DOI 10.1016/j.molcel.2013.01.017
   Jackson SP, 2009, NATURE, V461, P1071, DOI 10.1038/nature08467
   Jacquelot N, 2019, CELL RES, V29, P846, DOI 10.1038/s41422-019-0224-x
   Jeon YJ, 2017, MOL CELLS, V40, P83, DOI 10.14348/molcells.2017.0027
   Jeon YJ, 2012, J CLIN INVEST, V122, P2622, DOI 10.1172/JCI61762
   Jiang YN, 2019, PROTEIN CELL, V10, P681, DOI 10.1007/s13238-018-0598-4
   Jinawath N, 2004, ONCOGENE, V23, P6830, DOI 10.1038/sj.onc.1207886
   Jirawatnotai S, 2016, DNA REPAIR, V42, P56, DOI 10.1016/j.dnarep.2016.04.011
   Jurrus E, 2018, PROTEIN SCI, V27, P112, DOI 10.1002/pro.3280
   Kao SY, 2009, J BIOMED SCI, V16, DOI 10.1186/1423-0127-16-67
   Kao SY, 2009, BIOCHEM BIOPH RES CO, V382, P321, DOI 10.1016/j.bbrc.2009.03.048
   Kari V, 2018, EMBO REP, V19
   Kerscher O, 2006, ANNU REV CELL DEV BI, V22, P159, DOI 10.1146/annurev.cellbio.22.010605.093503
   Ketscher L, 2015, P NATL ACAD SCI USA, V112, P1577, DOI 10.1073/pnas.1412881112
   Kim CD, 2017, J NEUROPATH EXP NEUR, V76, P578, DOI 10.1093/jnen/nlx038
   Kim KI, 2004, MOL CELL BIOL, V24, P9592, DOI 10.1128/MCB.24.21.9592-9600.2004
   Kitange GJ, 2016, CELL REP, V14, P2587, DOI 10.1016/j.celrep.2016.02.045
   KNIGHT E, 1988, J BIOL CHEM, V263, P4520
   Krenciute G, 2013, J BIOL CHEM, V288, P20547, DOI 10.1074/jbc.M112.443416
   Kroismayr R, 2004, J CELL SCI, V117, P4749, DOI 10.1242/jcs.01338
   Kubbutat MHG, 1997, NATURE, V387, P299, DOI 10.1038/387299a0
   Kuffour EO, 2019, MBIO, V10, DOI 10.1128/mBio.01342-19
   Kuper J, 2014, PLOS BIOL, V12, DOI 10.1371/journal.pbio.1001954
   Laljee RP, 2013, ASIAN PAC J CANCER P, V14, P1147, DOI 10.7314/APJCP.2013.14.2.1147
   Langley C, 2019, ACTA CRYSTALLOGR D, V75, P21, DOI 10.1107/S2059798318015322
   Lee SB, 2015, MOL CELL, V60, P21, DOI 10.1016/j.molcel.2015.08.011
   Lertsooksawat W, 2019, MOL CELL BIOCHEM, V462, P51, DOI 10.1007/s11010-019-03609-5
   Letunic I, 2019, NUCLEIC ACIDS RES, V47, pW256, DOI 10.1093/nar/gkz239
   Leung JWC, 2017, GENE DEV, V31, P260, DOI 10.1101/gad.292516.116
   Li C, 2020, VET RES, V51, DOI 10.1186/s13567-020-00753-5
   Li C, 2014, ONCOTARGET, V5, P8429, DOI 10.18632/oncotarget.2316
   Li T, 2018, J EXP MED, V215, P1287, DOI 10.1084/jem.20180139
   Li W, 2019, NAT CELL BIOL, V21, P1273, DOI 10.1038/s41556-019-0388-0
   Li YL, 2018, AM J CANCER RES, V8, P1343
   Lin TY, 2020, AUTOPHAGY, V16, P1296, DOI 10.1080/15548627.2019.1671643
   Liu MJ, 2004, J INTERF CYTOK RES, V24, P647, DOI 10.1089/jir.2004.24.647
   Liu MJ, 2003, J BIOL CHEM, V278, P1594, DOI 10.1074/jbc.M208123200
   LOEB KR, 1992, J BIOL CHEM, V267, P7806
   Lou ZJ, 2009, AGING-US, V1, P608, DOI 10.18632/aging.100066
   Luszczek W, 2010, MOL CANCER THER, V9, P2309, DOI 10.1158/1535-7163.MCT-10-0309
   Madeira F, 2019, NUCLEIC ACIDS RES, V47, pW636, DOI 10.1093/nar/gkz268
   Madsen L, 2007, BMC BIOCHEM, V8, DOI 10.1186/1471-2091-8-S1-S1
   Magor KE, 2013, DEV COMP IMMUNOL, V41, P377, DOI 10.1016/j.dci.2013.04.010
   Mailand N, 2013, NAT REV MOL CELL BIO, V14, P269, DOI 10.1038/nrm3562
   Malakhov MP, 2002, J BIOL CHEM, V277, P9976, DOI 10.1074/jbc.M109078200
   Malakhova O, 2002, J BIOL CHEM, V277, P14703, DOI 10.1074/jbc.M111527200
   Malakhova OA, 2008, J BIOL CHEM, V283, P8783, DOI 10.1074/jbc.C800030200
   Malakhova OA, 2006, EMBO J, V25, P2358, DOI 10.1038/sj.emboj.7601149
   Marteijn JA, 2014, NAT REV MOL CELL BIO, V15, P465, DOI 10.1038/nrm3822
   Martin-Vicente M, 2017, FRONT IMMUNOL, V8, DOI 10.3389/fimmu.2017.01187
   Massey TH, 2018, DIS MODEL MECH, V11, DOI 10.1242/dmm.031930
   Maya-Mendoza A, 2018, NATURE, V559, P279, DOI 10.1038/s41586-018-0261-5
   Menon VR, 2019, CELL CYCLE, V18, P531, DOI 10.1080/15384101.2019.1577525
   Meroni A, 2020, J CELL BIOL, V219, DOI 10.1083/jcb.202007028
   Miller KM, 2012, BIOCHEM SOC T, V40, P370, DOI 10.1042/BST20110747
   Minakawa M, 2008, BIOL PHARM BULL, V31, P2223, DOI 10.1248/bpb.31.2223
   Ming M, 2012, CANCER LETT, V319, P125, DOI 10.1016/j.canlet.2012.01.003
   Mistry Helena, 2010, Genome Integr, V1, P7, DOI 10.1186/2041-9414-1-7
   MIYASHITA T, 1995, CELL, V80, P293
   Morales AJ, 2017, ELIFE, V6, DOI 10.7554/eLife.24655
   Mosbech A, 2012, NAT STRUCT MOL BIOL, V19, P1084, DOI 10.1038/nsmb.2395
   Moumen A, 2005, CELL, V123, P1065, DOI 10.1016/j.cell.2005.09.032
   Moumen A, 2013, CELL CYCLE, V12, P698, DOI 10.4161/cc.23592
   Mukherjee AK, 2018, PLOS GENET, V14, DOI 10.1371/journal.pgen.1007782
   Mustachio LM, 2017, ONCOTARGET, V8, P3, DOI 10.18632/oncotarget.13914
   Nakano K, 2001, MOL CELL, V7, P683, DOI 10.1016/S1097-2765(01)00214-3
   Nakashima H, 2015, J BIOL CHEM, V290, P1485, DOI 10.1074/jbc.M114.593871
   Narasimhan J, 2005, J BIOL CHEM, V280, P27356, DOI 10.1074/jbc.M502814200
   Neves-Costa A, 2017, FEBS J, V284, P680, DOI 10.1111/febs.13910
   Ng JMY, 2003, GENE DEV, V17, P1630, DOI 10.1101/gad.260003
   Nicolai S, 2020, ONCOGENE, V39, P754, DOI 10.1038/s41388-019-1028-7
   Okumura F, 2007, GENE DEV, V21, P255, DOI 10.1101/gad.1521607
   Okumura F, 2013, J BIOL CHEM, V288, P2839, DOI 10.1074/jbc.M112.401851
   Osborne HC, 2020, TRENDS MOL MED, V26, P1133, DOI 10.1016/j.molmed.2020.08.009
   Ostvik AE, 2020, J CROHNS COLITIS, V14, P920, DOI 10.1093/ecco-jcc/jjaa022
   Padovan E, 2002, CANCER RES, V62, P3453
   Paredes F, 2016, FREE RADICAL BIO MED, V90, P206, DOI 10.1016/j.freeradbiomed.2015.11.024
   Park JH, 2016, NAT COMMUN, V7, DOI 10.1038/ncomms12513
   Park JM, 2014, MOL CELL, V54, P626, DOI 10.1016/j.molcel.2014.03.031
   Park YS, 2017, TOX RESEARCH, V33, P211, DOI 10.5487/TR.2017.33.3.211
   Parsons JL, 2008, MOL CELL, V29, P477, DOI 10.1016/j.molcel.2007.12.027
   Perng YC, 2018, NAT REV MICROBIOL, V16, P423, DOI 10.1038/s41579-018-0020-5
   Peuscher MH, 2011, NAT CELL BIOL, V13, P1139, DOI 10.1038/ncb2326
   Pitha-Rowe I, 2004, J BIOL CHEM, V279, P18178, DOI 10.1074/jbc.M309259200
   Polo SE, 2012, MOL CELL, V45, P505, DOI 10.1016/j.molcel.2011.12.035
   Potter JL, 1999, J BIOL CHEM, V274, P25061, DOI 10.1074/jbc.274.35.25061
   Povlsen LK, 2012, NAT CELL BIOL, V14, P1089, DOI 10.1038/ncb2579
   Qin B, 2020, SCI ADV, V6, DOI 10.1126/sciadv.aax8214
   Qiu XX, 2015, INT J CLIN EXP MED, V8, P17140
   Quinet A, 2017, MOL CELL, V68, P830, DOI 10.1016/j.molcel.2017.11.022
   Radoshevich L, 2015, ELIFE, V4, DOI 10.7554/eLife.06848
   Raso MC, 2020, J CELL BIOL, V219, DOI 10.1083/jcb.202002175
   Reinhardt HC, 2013, NAT REV MOL CELL BIO, V14, P563, DOI 10.1038/nrm3640
   Reinhardt HC, 2012, TRENDS GENET, V28, P128, DOI 10.1016/j.tig.2011.12.002
   Rhee HW, 2013, SCIENCE, V339, P1328, DOI 10.1126/science.1230593
   Ribeiro-Silva C, 2019, DNA REPAIR, V77, P87, DOI 10.1016/j.dnarep.2019.03.007
   Ritchie KJ, 2004, NAT MED, V10, P1374, DOI 10.1038/nm1133
   Robert X, 2014, NUCLEIC ACIDS RES, V42, pW320, DOI 10.1093/nar/gku316
   Robin JD, 2014, GENE DEV, V28, P2464, DOI 10.1101/gad.251041.114
   Salas-Armenteros I, 2017, EMBO J, V36, P3532, DOI 10.15252/embj.201797208
   Sale JE, 2013, CSH PERSPECT BIOL, V5, DOI 10.1101/cshperspect.a012708
   Sale JE, 2012, NAT REV MOL CELL BIO, V13, P141, DOI 10.1038/nrm3289
   Sameer AS, 2018, FRONT MOL BIOSCI, V5, DOI 10.3389/fmolb.2018.00023
   Schwertman P, 2016, NAT REV MOL CELL BIO, V17, P379, DOI 10.1038/nrm.2016.58
   Shah SJ, 2008, MOL CANCER THER, V7, P905, DOI 10.1158/1535-7163.MCT-07-0515
   Sharma S, 2007, PLOS ONE, V2, DOI 10.1371/journal.pone.0001297
   Shen J, 2013, J TRANSL MED, V11, DOI 10.1186/1479-5876-11-73
   Shi HX, 2010, MOL CELL BIOL, V30, P2424, DOI 10.1128/MCB.01466-09
   Shkreta L, 2015, BIOMOLECULES, V5, P2935, DOI 10.3390/biom5042935
   Soria-Bretones I, 2017, NAT COMMUN, V8, DOI 10.1038/s41467-017-00183-6
   Stadler J, 2017, INT J MOL SCI, V18, DOI 10.3390/ijms18081715
   Stiff T, 2004, DNA REPAIR, V3, P245, DOI 10.1016/j.dnarep.2003.11.001
   Sugasawa K., 2019, MECH REGULATION DNA, V45
   Swaim CD, 2020, CELL REP, V31, DOI 10.1016/j.celrep.2020.107772
   Swaim CD, 2017, MOL CELL, V68, P581, DOI 10.1016/j.molcel.2017.10.003
   Takeuchi T, 2005, BIOCHEM BIOPH RES CO, V336, P9, DOI 10.1016/j.bbrc.2005.08.034
   Takeuchi T, 2006, BIOCHEM BIOPH RES CO, V348, P473, DOI 10.1016/j.bbrc.2006.07.076
   Talvinen K, 2006, ANTICANCER RES, V26, P4745
   Tao J, 2015, INT J CLIN EXP PATHO, V8, P10975
   Teloni F, 2019, MOL CELL, V73, P670, DOI 10.1016/j.molcel.2018.11.036
   Teng Y, 2018, CURR CANCER DRUG TAR, V18, P256, DOI 10.2174/1568009617666170522094730
   Tessema M, 2012, ONCOGENE, V31, P4107, DOI 10.1038/onc.2011.577
   Torrecilla I, 2017, PHILOS T R SOC B, V372, DOI 10.1098/rstb.2016.0282
   Uckelmann M, 2018, NAT COMMUN, V9, DOI 10.1038/s41467-017-02653-3
   Velimezi G, 2018, NAT COMMUN, V9, DOI 10.1038/s41467-018-04649-z
   Villarroya-Beltri C, 2016, NAT COMMUN, V7, DOI 10.1038/ncomms13588
   Vuillier F, 2019, SCI REP-UK, V9, DOI 10.1038/s41598-019-39343-7
   Wan XX, 2013, BIOMED RES INT, V2013, DOI 10.1155/2013/570909
   Wang B, 2020, J INVEST MED, V68, P786, DOI 10.1136/jim-2019-001145
   Wang JM, 2020, BBA-MOL CELL RES, V1867, DOI 10.1016/j.bbamcr.2020.118647
   Wang XH, 2009, BRIT J CANCER, V100, P1347, DOI 10.1038/sj.bjc.6604985
   Wei JX, 2012, J NUCLEIC ACIDS, V2012, DOI 10.1155/2012/687359
   Weichselbaum RR, 2008, P NATL ACAD SCI USA, V105, P18490, DOI 10.1073/pnas.0809242105
   Wiesmann N, 2017, CARCINOGENESIS, V38, P321, DOI 10.1093/carcin/bgx006
   Wilkins AC, 2019, J PATHOL, V247, P606, DOI 10.1002/path.5232
   Wong JJY, 2006, P NATL ACAD SCI USA, V103, P10735, DOI 10.1073/pnas.0600397103
   Wood LM, 2011, PLOS ONE, V6, DOI 10.1371/journal.pone.0016422
   Xu DC, 2015, AUTOPHAGY, V11, P617, DOI 10.1080/15548627.2015.1023982
   Xu ZX, 2003, MOL CELL BIOL, V23, P4247, DOI 10.1128/MCB.23.12.4247-4256.2003
   Yeh YH, 2013, CLIN CANCER RES, V19, P5927, DOI 10.1158/1078-0432.CCR-13-0018
   Yoo L, 2018, CELL DEATH DIS, V9, DOI 10.1038/s41419-017-0138-9
   Yu J, 2020, CELL BIOSCI, V10, DOI 10.1186/s13578-020-0380-1
   Yu SF, 2019, CELL DEATH DIS, V10, DOI 10.1038/s41419-019-1488-2
   Zeman MK, 2014, NAT CELL BIOL, V16, P2, DOI 10.1038/ncb2897
   Zhang DX, 2011, J INTERF CYTOK RES, V31, P119, DOI 10.1089/jir.2010.0110
   Zhang HX, 2016, NAT COMMUN, V7, DOI 10.1038/ncomms10201
   Zhang XQ, 2015, NATURE, V517, P89, DOI 10.1038/nature13801
   Zhang XW, 2015, J PATHOL, V235, P656, DOI 10.1002/path.4478
   Zhang XY, 2011, MOL CELL BIOL, V31, P5037, DOI 10.1128/MCB.06297-11
   Zhang YF, 2019, NAT COMMUN, V10, DOI 10.1038/s41467-019-13393-x
   Zhao C, 2004, P NATL ACAD SCI USA, V101, P7578, DOI 10.1073/pnas.0402528101
   Zhao C, 2005, P NATL ACAD SCI USA, V102, P10200, DOI 10.1073/pnas.0504754102
   Zhao M, 2018, INT J BIOL SCI, V14, P111, DOI 10.7150/ijbs.23230
   Zhu XF, 2017, ONCOTARGET, V8, P36423, DOI 10.18632/oncotarget.16855
   Zou WG, 2006, J BIOL CHEM, V281, P3989, DOI 10.1074/jbc.M510787200
   Zuin Alice, 2014, Cells, V3, P690, DOI 10.3390/cells3030690
NR 266
TC 5
Z9 5
U1 1
U2 5
PU MDPI
PI BASEL
PA ST ALBAN-ANLAGE 66, CH-4052 BASEL, SWITZERLAND
EI 2218-273X
J9 BIOMOLECULES
JI Biomolecules
PD NOV
PY 2020
VL 10
IS 11
AR 1557
DI 10.3390/biom10111557
PG 30
WC Biochemistry & Molecular Biology
WE Science Citation Index Expanded (SCI-EXPANDED)
SC Biochemistry & Molecular Biology
GA OW2PK
UT WOS:000592735300001
PM 33203188
OA Green Published, Green Submitted, gold
DA 2022-04-10
ER

PT J
AU Park, SJ
   Shin, JH
   Jeong, JI
   Song, JH
   Jo, YK
   Kim, ES
   Lee, EH
   Hwang, JJ
   Lee, EK
   Chung, SJ
   Koh, JY
   Jo, DG
   Cho, DH
AF Park, So Jung
   Shin, Ji Hyun
   Jeong, Jae In
   Song, Ji Hoon
   Jo, Yoon Kyung
   Kim, Eun Sung
   Lee, Eunjoo H.
   Hwang, Jung Jin
   Lee, Eun Kyung
   Chung, Sun Ju
   Koh, Jae-Young
   Jo, Dong-Gyu
   Cho, Dong-Hyung
TI Down-regulation of Mortalin Exacerbates A beta-mediated Mitochondrial
   Fragmentation and Dysfunction
SO JOURNAL OF BIOLOGICAL CHEMISTRY
LA English
DT Article
DE Alzheimers Disease; Cell Death; Mitochondria; Mitochondrial Apoptosis;
   Neurodegenerative Diseases; Drp1; Amyloid-; Mitochondrial Fission;
   Mortalin
ID DYNAMIN-RELATED GTPASE; DEPENDENT PROTEIN-KINASE; HSP70 FAMILY;
   PROTEOMIC IDENTIFICATION; cancer cells; DRP1; FISSION; PHOSPHORYLATION;
   FUSION; DISEASE
AB Mitochondrial dynamics greatly influence the biogenesis and morphology of mitochondria. Mitochondria are particularly important in neurons, which have a high demand for energy. Therefore, mitochondrial dysfunction is strongly associated with neurodegenerative diseases. Until now various post-translational modification for mitochondrial dynamic proteins and several regulatory proteins have explained complex mitochondrial dynamics. However, the precise mechanism that coordinates these complex processes remains unclear. To further understand the regulatory machinery of mitochondrial dynamics, we screened a mitochondrial siRNA library and identified mortalin as a potential regulatory protein. Both genetic and chemical inhibition of mortalin strongly induced mitochondrial fragmentation and synergistically increased A-mediated cytotoxicity as well as mitochondrial dysfunction. Importantly we determined that the expression of mortalin in Alzheimer disease (AD) patients and in the triple transgenic-AD mouse model was considerably decreased. In contrast, overexpression of mortalin significantly suppressed A-mediated mitochondrial fragmentation and cell death. Taken together, our results suggest that down-regulation of mortalin may potentiate A-mediated mitochondrial fragmentation and dysfunction in AD.
C1 [Park, So Jung; Shin, Ji Hyun; Jo, Yoon Kyung; Kim, Eun Sung; Lee, Eunjoo H.; Cho, Dong-Hyung] Kyung Hee Univ, Grad Sch East West Med Sci, Dept East West Med Sci, Yongin 446701, South Korea.
   [Jeong, Jae In; Jo, Dong-Gyu] Sungkyunkwan Univ, Sch Pharm, Suwon 440746, South Korea.
   [Chung, Sun Ju; Koh, Jae-Young] Univ Ulsan, Coll Med, Asan Med Ctr, Dept Neurol, Seoul 138736, South Korea.
   [Song, Ji Hoon; Hwang, Jung Jin] Univ Ulsan, Coll Med, Asan Med Ctr, Asan Inst Life Sci,Inst Innovat Canc Res, Seoul 138736, South Korea.
   [Lee, Eun Kyung] Catholic Univ Korea, Dept Biochem, Coll Med, Seoul 137701, South Korea.
RP Cho, DH (corresponding author), 1 Seocheon Dong, Yongin 446701, Gyeoggi Do, South Korea.
EM dhcho@khu.ac.kr
RI Jo, Dong-Gyu/AAN-9278-2021; Hwang, Jung Jin/F-3424-2014; Koh,
   Jae-Young/C-9014-2011
OI Jo, Dong-Gyu/0000-0003-2271-1076; Koh, Jae-Young/0000-0002-4318-495X;
   Lee, Eunjoo H./0000-0002-5569-0067
FU Korean Health 21 R&D Project, Ministry of Health & Welfare, Republic of
   Korea [A092042]; Korea-UK Collaborative Alzheimer's Disease Research
   Project, Ministry of Health & Welfare, Republic of Korea [A120196]
FX This work was supported by Korean Health 21 R&D Project, Ministry of
   Health & Welfare, Republic of Korea Grant A092042 and the Korea-UK
   Collaborative Alzheimer's Disease Research Project, Ministry of Health &
   Welfare, Republic of Korea Grant A120196.
CR Alexander C, 2000, NAT GENET, V26, P211, DOI 10.1038/79944
   Ball M, 1997, NEUROBIOL AGING, V18, pS1, DOI 10.1016/s0197-4580(97)00057-2
   Barsoum MJ, 2006, EMBO J, V25, P3900, DOI 10.1038/sj.emboj.7601253
   BHATTACHARYYA T, 1995, J BIOL CHEM, V270, P1705, DOI 10.1074/jbc.270.4.1705
   Braschi E, 2009, EMBO REP, V10, P748, DOI 10.1038/embor.2009.86
   Buizza L, 2012, PLOS ONE, V7, DOI 10.1371/journal.pone.0029789
   Burbulla LF, 2010, HUM MOL GENET, V19, P4437, DOI 10.1093/hmg/ddq370
   Cereghetti GM, 2008, P NATL ACAD SCI USA, V105, P15803, DOI 10.1073/pnas.0808249105
   Chan DC, 2006, CELL, V125, P1241, DOI 10.1016/j.cell.2006.06.010
   Chang CR, 2007, J BIOL CHEM, V282, P21583, DOI 10.1074/jbc.C700083200
   Chang CR, 2010, J BIOL CHEM, V285, P32494, DOI 10.1074/jbc.M110.142430
   Chen HC, 2009, HUM MOL GENET, V18, pR169, DOI 10.1093/hmg/ddp326
   Chen Y, 2013, SCIENCE, V340, P471, DOI 10.1126/science.1231031
   Chiasserini D, 2011, MOVEMENT DISORD, V26, P1639, DOI 10.1002/mds.23647
   Cho DH, 2010, CELL MOL LIFE SCI, V67, P3435, DOI 10.1007/s00018-010-0435-2
   Cho DH, 2009, SCIENCE, V324, P102, DOI 10.1126/science.1171091
   Choi J, 2004, FREE RADICAL BIO MED, V36, P1155, DOI 10.1016/j.freeradbiomed.2004.02.002
   Cribbs JT, 2007, EMBO REP, V8, P939, DOI 10.1038/sj.embor.7401062
   Deocaris CC, 2007, CANCER LETT, V252, P259, DOI 10.1016/j.canlet.2006.12.038
   Devi L, 2006, J NEUROSCI, V26, P9057, DOI 10.1523/JNEUROSCI.1469-06.2006
   Dundas SR, 2005, J PATHOL, V205, P74, DOI 10.1002/path.1672
   Eura Y, 2006, J CELL SCI, V119, P4913, DOI 10.1242/jcs.03253
   Figueroa-Romero C, 2009, FASEB J, V23, P3917, DOI 10.1096/fj.09-136630
   Gawlowski T, 2012, J BIOL CHEM, V287, P30024, DOI 10.1074/jbc.M112.390682
   Han XJ, 2008, J CELL BIOL, V182, P573, DOI 10.1083/jcb.200802164
   Harder Z, 2004, CURR BIOL, V14, P340, DOI 10.1016/j.cub.2004.02.004
   Hooper C, 2007, NEUROSCI LETT, V415, P135, DOI 10.1016/j.neulet.2007.01.049
   Ishihara N, 2009, NAT CELL BIOL, V11, P958, DOI 10.1038/ncb1907
   Jin JH, 2006, MOL CELL PROTEOMICS, V5, P1193, DOI 10.1074/mcp.M500382-MCP200
   Jo DG, 2010, NEUROBIOL AGING, V31, P917, DOI 10.1016/j.neurobiolaging.2008.07.003
   Kampinga HH, 2010, NAT REV MOL CELL BIO, V11, P579, DOI 10.1038/nrm2941
   Karbowski M, 2007, J CELL BIOL, V178, P71, DOI 10.1083/jcb.200611064
   Kaul SC, 2003, EXP CELL RES, V286, P96, DOI 10.1016/S0014-4827(03)00101-0
   Kaul SC, 2007, EXP GERONTOL, V42, P263, DOI 10.1016/j.exger.2006.10.020
   Kawai A, 2001, J CELL SCI, V114, P3565
   Kim NC, 2013, NEURON, V78, P65, DOI 10.1016/j.neuron.2013.02.029
   Knott AB, 2008, NAT REV NEUROSCI, V9, P505, DOI 10.1038/nrn2417
   Liesa M, 2009, PHYSIOL REV, V89, P799, DOI 10.1152/physrev.00030.2008
   Merkwirth C, 2008, GENE DEV, V22, P476, DOI 10.1101/gad.460708
   Meuer K, 2007, CELL DEATH DIFFER, V14, P651, DOI 10.1038/sj.cdd.4402087
   Niemann A, 2005, J CELL BIOL, V170, P1067, DOI 10.1083/jcb.200507087
   Oddo S, 2003, NEUROBIOL AGING, V24, P1063, DOI 10.1016/j.neurobiolaging.2003.08.012
   Osorio C, 2007, NEUROBIOL AGING, V28, P1853, DOI 10.1016/j.neurobiolaging.2006.08.011
   Otera H, 2010, J CELL BIOL, V191, P1141, DOI 10.1083/jcb.201007152
   Palmer CS, 2011, CELL SIGNAL, V23, P1534, DOI 10.1016/j.cellsig.2011.05.021
   Palmer CS, 2011, EMBO REP, V12, P565, DOI 10.1038/embor.2011.54
   Park J., 2010, PLOS ONE, V5
   Park SJ, 2012, FEBS LETT, V586, P4303, DOI 10.1016/j.febslet.2012.10.035
   Qu MY, 2012, NEUROSCI RES, V72, P94, DOI 10.1016/j.neures.2011.09.009
   Qu MY, 2011, BRAIN RES, V1368, P336, DOI 10.1016/j.brainres.2010.10.068
   SCHNEIDER HC, 1994, NATURE, V371, P768, DOI 10.1038/371768a0
   Shi M, 2008, J NEUROPATH EXP NEUR, V67, P117, DOI 10.1097/nen.0b013e318163354a
   Su B, 2010, BBA-MOL BASIS DIS, V1802, P135, DOI 10.1016/j.bbadis.2009.09.013
   Taguchi N, 2007, J BIOL CHEM, V282, P11521, DOI 10.1074/jbc.M607279200
   Takano S, 1997, EXP CELL RES, V237, P38, DOI 10.1006/excr.1997.3754
   Tamai S, 2008, J CELL SCI, V121, P2588, DOI 10.1242/jcs.026625
   Taylor SW, 2003, NAT BIOTECHNOL, V21, P281, DOI 10.1038/nbt793
   Tondera D, 2005, J CELL SCI, V118, P3049, DOI 10.1242/jcs.02415
   Tondera D, 2009, EMBO J, V28, P1589, DOI 10.1038/emboj.2009.89
   WADHWA R, 1993, J BIOL CHEM, V268, P6615
   Wadhwa R, 1998, J BIOL CHEM, V273, P29586, DOI 10.1074/jbc.273.45.29586
   Wadhwa R, 2000, CANCER RES, V60, P6818
   Walker C, 2006, AM J PATHOL, V168, P1526, DOI 10.2353/ajpath.2006.050603
   Wang AM, 2013, NAT CHEM BIOL, V9, P112, DOI [10.1038/NCHEMBIO.1140, 10.1038/nchembio.1140]
   Wang XW, 2008, NAT CELL BIOL, V10, P1090, DOI 10.1038/ncb1769
   Westermann B, 2010, NAT REV MOL CELL BIO, V11, P872, DOI 10.1038/nrm3013
   Yang H, 2011, BIOCHEM BIOPH RES CO, V410, P114, DOI 10.1016/j.bbrc.2011.05.116
   Yokoyama K, 2002, FEBS LETT, V516, P53, DOI 10.1016/S0014-5793(02)02470-5
   Yonashiro R, 2006, EMBO J, V25, P3618, DOI 10.1038/sj.emboj.7601249
   Yoon YS, 2006, J CELL PHYSIOL, V209, P468, DOI 10.1002/jcp.20753
   Zuchner S, 2004, NAT GENET, V36, P449, DOI 10.1038/ng1341
   Zunino R, 2007, J CELL SCI, V120, P1178, DOI 10.1242/jcs.03418
NR 72
TC 44
Z9 44
U1 1
U2 13
PU AMER SOC BIOCHEMISTRY MOLECULAR BIOLOGY INC
PI BETHESDA
PA 9650 ROCKVILLE PIKE, BETHESDA, MD 20814-3996 USA
EI 1083-351X
J9 J BIOL CHEM
JI J. Biol. Chem.
PD JAN 24
PY 2014
VL 289
IS 4
BP 2195
EP 2204
DI 10.1074/jbc.M113.492587
PG 10
WC Biochemistry & Molecular Biology
WE Science Citation Index Expanded (SCI-EXPANDED)
SC Biochemistry & Molecular Biology
GA AA5IV
UT WOS:000331130200027
PM 24324263
OA Green Published, hybrid
DA 2022-04-10
ER

PT J
AU Ling, T
   Weng, GX
   Li, J
   Li, CS
   Wang, WY
   Cao, LZ
   Rao, H
   Ju, C
   Xu, LG
AF Ling, Ting
   Weng, Guang-Xiu
   Li, Jing
   Li, Changsheng
   Wang, Weiying
   Cao, Lingzhen
   Rao, Hua
   Ju, Cynthia
   Xu, Liang-Guo
TI TARBP2 inhibits IRF7 activation by suppressing TRAF6-mediated K63-linked
   ubiquitination of IRF7
SO MOLECULAR IMMUNOLOGY
LA English
DT Article
DE IRF7; TRAF6; TARBP2; Ubiquitination; Phosphorylation
ID INTERFERON REGULATORY FACTOR-7; TOLL-LIKE RECEPTORS;
   RNA-BINDING-PROTEIN; I INTERFERON; IKK-EPSILON; TRAF6; VIRUSES; DICER;
   TRBP; DEUBIQUITINATION
AB Interferon regulatory factor 7 (IRF7), a crucial regulator of type I interferons (IFNs), plays a crucial role in resistance to viral infection. The abnormal production of type I IFNs is associated with many types of disease, such as cancer and inflammatory disorders. Thus, understanding the post-translational modification of IRF7 is essential to promoting an appropriate immune response. We have recently showed that the TAR RNA binding protein 2 (TARBP2) suppresses IFN-beta production and the innate antiviral response by targeting MAVS. Here, we further identified TARBP2 as a novel inhibitor of IRF7, which inhibits IRF7-mediated IFN-beta production triggered by the Sendai virus in 293 T cells. Overexpression of TARBP2 inhibits the phosphorylation as well as the K63-linked ubiquitination of IRF7, whilst TARBP2 also impairs the stability of endogenous TRAF6. Furthermore, TARBP2 participates in the interaction between IRF7 and TRAF6, thereby suppressing TRAF6-mediated K63-linked ubiquitination of IRF7, which is a prerequisite of IRF7 phosphorylation. Our findings further reveal the mechanism by which TARBP2 regulates the antiviral signaling pathway of the innate immune system.
C1 [Ling, Ting; Weng, Guang-Xiu; Li, Jing; Li, Changsheng; Wang, Weiying; Cao, Lingzhen; Rao, Hua; Xu, Liang-Guo] Jiangxi Normal Univ, Minist Educ, Key Lab Funct Small Organ Mol, 99 Ziyang Ave, Nanchang 330022, Jiangxi, Peoples R China.
   [Ling, Ting; Weng, Guang-Xiu; Li, Jing; Li, Changsheng; Wang, Weiying; Cao, Lingzhen; Rao, Hua; Xu, Liang-Guo] Jiangxi Normal Univ, Coll Life Sci, 99 Ziyang Ave, Nanchang 330022, Jiangxi, Peoples R China.
   [Ju, Cynthia] Univ Texas Hlth Sci Ctr Houston, McGovern Med Sch, Dept Anesthesiol, Houston, TX 77030 USA.
RP Xu, LG (corresponding author), Jiangxi Normal Univ, Minist Educ, Key Lab Funct Small Organ Mol, 99 Ziyang Ave, Nanchang 330022, Jiangxi, Peoples R China.; Xu, LG (corresponding author), Jiangxi Normal Univ, Coll Life Sci, 99 Ziyang Ave, Nanchang 330022, Jiangxi, Peoples R China.; Ju, C (corresponding author), Univ Texas Hlth Sci Ctr Houston, McGovern Med Sch, Dept Anesthesiol, Houston, TX 77030 USA.
EM Changqing.Ju@uth.tmc.edu; xul@jxnu.edu.cn
FU National Natural Science Foundation of ChinaNational Natural Science
   Foundation of China (NSFC) [31370876, 31570876]; Natural Science
   Foundation of Jiangxi ProvinceNatural Science Foundation of Jiangxi
   Province [20143ACB20004, 20161BAB204177]; Open Project Program of Key
   Laboratory of Functional Small Organic Molecule; Jiangxi Normal
   University [KLFS-KF-201407]; Ministry of Education
FX We are grateful to Dr. Hong-Bing Shu (Medical Research Institute, Wuhan
   University) for providing plasmids and other reagents. This work was
   supported by grants from the National Natural Science Foundation of
   China (grant Nos. 31370876, 31570876), the Natural Science Foundation of
   Jiangxi Province (20143ACB20004, 20161BAB204177), the Open Project
   Program of Key Laboratory of Functional Small Organic Molecule, the
   Ministry of Education, and Jiangxi Normal University (KLFS-KF-201407).
CR Bannwarth S, 2001, J BIOL CHEM, V276, P48803, DOI 10.1074/jbc.M104645200
   Bhoj VG, 2009, NATURE, V458, P430, DOI 10.1038/nature07959
   Bonjardim CA, 2009, IMMUNOL LETT, V122, P1, DOI 10.1016/j.imlet.2008.11.002
   Caillaud A, 2002, J BIOL CHEM, V277, P49417, DOI 10.1074/jbc.M207484200
   Chang J, 2011, AIDS, V25, P715, DOI 10.1097/QAD.0b013e328343c186
   Daniels SM, 2009, BMC MOL BIOL, V10, DOI 10.1186/1471-2199-10-38
   Davis ME, 2015, VIROLOGY, V479, P52, DOI 10.1016/j.virol.2015.02.033
   Fitzgerald KA, 2003, NAT IMMUNOL, V4, P491, DOI 10.1038/ni921
   Funakoshi-Tago M, 2008, CELL SIGNAL, V20, P1679, DOI 10.1016/j.cellsig.2008.05.013
   GATIGNOL A, 1991, SCIENCE, V251, P1597, DOI 10.1126/science.2011739
   Gonzalez-Navajas JM, 2012, NAT REV IMMUNOL, V12, P125, DOI 10.1038/nri3133
   Haase AD, 2005, EMBO REP, V6, P961, DOI 10.1038/sj.embor.7400509
   Hammond SM, 2005, FEBS LETT, V579, P5822, DOI 10.1016/j.febslet.2005.08.079
   He X, 2013, J MOL CELL BIOL, V5, P39, DOI 10.1093/jmcb/mjs024
   Higgs R, 2010, PLOS ONE, V5, DOI 10.1371/journal.pone.0011776
   Honda K, 2005, NATURE, V434, P772, DOI 10.1038/nature03464
   Honda K, 2006, NAT REV IMMUNOL, V6, P644, DOI 10.1038/nri1900
   Hoshino K, 2006, NATURE, V440, P949, DOI 10.1038/nature04641
   Huang J, 2005, EMBO J, V24, P4018, DOI 10.1038/sj.emboj.7600863
   Huye LE, 2007, MOL CELL BIOL, V27, P2910, DOI 10.1128/MCB.02256-06
   Kawai T, 2004, NAT IMMUNOL, V5, P1061, DOI 10.1038/ni1118
   Khan KA, 2013, J INNATE IMMUN, V5, P639, DOI 10.1159/000350517
   Kim WU, 2009, AUTOIMMUN REV, V8, P204, DOI 10.1016/j.autrev.2008.07.046
   Kitagawa Y, 2013, J VIROL, V87, P7966, DOI 10.1128/JVI.03525-12
   Komuro A, 2016, BIOCHEM BIOPH RES CO, V480, P187, DOI 10.1016/j.bbrc.2016.10.023
   Konno H, 2009, PLOS ONE, V4, DOI 10.1371/journal.pone.0005674
   Kubota T, 2008, J BIOL CHEM, V283, P25660, DOI 10.1074/jbc.M804479200
   Lee HY, 2013, NUCLEIC ACIDS RES, V41, P6568, DOI 10.1093/nar/gkt361
   Li S, 2010, J BIOL CHEM, V285, P4291, DOI 10.1074/jbc.M109.074971
   Liang QM, 2012, J VIROL, V86, P10162, DOI 10.1128/JVI.05224-11
   Ling T, 2018, MOL IMMUNOL, V104, P1, DOI 10.1016/j.molimm.2018.10.017
   MacRae IJ, 2008, P NATL ACAD SCI USA, V105, P512, DOI 10.1073/pnas.0710869105
   Marie I, 2000, MOL CELL BIOL, V20, P8803, DOI 10.1128/MCB.20.23.8803-8814.2000
   Ning S, 2011, GENES IMMUN, V12, P399, DOI 10.1038/gene.2011.21
   Ning SB, 2008, MOL CELL BIOL, V28, P6536, DOI 10.1128/MCB.00785-08
   Pagano JS, 2002, NEW ENGL J MED, V347, P78, DOI 10.1056/NEJMp020056
   Randall RE, 2008, J GEN VIROL, V89, P1, DOI 10.1099/vir.0.83391-0
   Sato M, 2000, IMMUNITY, V13, P539, DOI 10.1016/S1074-7613(00)00053-4
   Schirrmacher, 2009, INT J ONCOL, V34
   Schwartz JA, 2017, J IMMUNOL, V198, P3181, DOI 10.4049/jimmunol.1601298
   Shackelford J, 2004, MOL CELL BIOL, V24, P5089, DOI 10.1128/MCB.24.12.5089-5093.2004
   Sharma S, 2003, SCIENCE, V300, P1148, DOI 10.1126/science.1081315
   Sirois M, 2011, PLOS ONE, V6, DOI 10.1371/journal.pone.0028125
   STJOHNSTON D, 1992, P NATL ACAD SCI USA, V89, P10979, DOI 10.1073/pnas.89.22.10979
   Wang KZQ, 2010, J CELL BIOCHEM, V110, P763, DOI 10.1002/jcb.22589
   Wang Z, 2010, GENE THER, V17, P1063, DOI 10.1038/gt.2010.53
   Wilson RC, 2015, MOL CELL, V57, P397, DOI 10.1016/j.molcel.2014.11.030
   Yoshida R, 2008, J BIOL CHEM, V283, P36211, DOI 10.1074/jbc.M806576200
   Yu YX, 2010, IMMUNITY, V33, P863, DOI 10.1016/j.immuni.2010.11.027
   Zhang LW, 2004, J VIROL, V78, P12987, DOI 10.1128/JVI.78.23.12987-12995.2004
   2001, J BIOL CHEM, V276, P8951
NR 51
TC 10
Z9 10
U1 3
U2 16
PU PERGAMON-ELSEVIER SCIENCE LTD
PI OXFORD
PA THE BOULEVARD, LANGFORD LANE, KIDLINGTON, OXFORD OX5 1GB, ENGLAND
SN 0161-5890
J9 MOL IMMUNOL
JI Mol. Immunol.
PD MAY
PY 2019
VL 109
BP 116
EP 125
DI 10.1016/j.molimm.2019.02.019
PG 10
WC Biochemistry & Molecular Biology; Immunology
WE Science Citation Index Expanded (SCI-EXPANDED)
SC Biochemistry & Molecular Biology; Immunology
GA HV5WK
UT WOS:000466055600014
PM 30927622
DA 2022-04-10
ER

PT J
AU Verdier-Pinard, P
   Pasquier, E
   Xiao, H
   Burd, B
   Villard, C
   Lafitte, D
   Miller, LM
   Angeletti, RH
   Horwitz, SB
   Braguer, D
AF Verdier-Pinard, Pascal
   Pasquier, Eddy
   Xiao, Hui
   Burd, Berta
   Villard, Claude
   Lafitte, Daniel
   Miller, Leah M.
   Angeletti, Ruth H.
   Horwitz, Susan Band
   Braguer, Diane
TI Tubulin proteomics: Towards breaking the code
SO ANALYTICAL BIOCHEMISTRY
LA English
DT Review
ID III BETA-TUBULIN; CANCER-CELL LINES; C-TERMINAL TAIL; ALPHA-TUBULIN;
   mass spectrometry; post-translational modification; MICROTUBULE
   FUNCTION; MONOCLONAL-ANTIBODY; BRAIN; POLYGLUTAMYLATION
AB Microtubules (MTs)(2) are dynamic polymers of alpha/beta tubulin heterodimers that are involved in numerous processes such as cell division and migration. MT dynamics is characterized by stochastic transitions between phases of growth and phases of disassembly (catastrophes) and vice versa (pauses and rescues) occurring at the tips of MTs [1]. The resulting basal dynamics is precisely tuned by the expression profile of tubulin isotypes [2], the transient association of proteins to MTs and by the crosstalk between MTs, chromosomes, actin filaments and adhesion sites [3]. MTs also function as a scaffold for a large number of signaling proteins and may serve to localize and regulate their activities. protein-protein interaction occurring at the surface of MTs have been shown to depend on the extent and nature of tubulin post-translational modification [4-6]. Progress in deciphering the enzymatic complexes involved in these modifications of tubulin has enabled the development of in vivo models that are key to obtaining insight into the functional significance of this diversity of tubulin species 17,8]. Besides the physiological role of the spatio-temporal expression of different tubulin isotypes, some forms of tubulin have been associated with disease states and therefore represent useful biomarkerss [9-13]. These findings underscore the need for advanced qualitative and quantitative analytical approaches allowing the detection of alpha- and beta-tubulin isotype expression ill human cells and tissues. This review will focus on the contributions of high-resolution protein separation and mass spectrometry (VIS) either directly towards this goal or indirectly through the validation of antibodies directed against specific a- or P-tubulin isotypes. The other members of the tubulin family of proteins (gamma, delta, epsilon, and zeta) are not included in this review, but some of the cited principles may be applicable to the analysis of their expression.
C1 [Verdier-Pinard, Pascal; Pasquier, Eddy; Villard, Claude; Lafitte, Daniel; Braguer, Diane] Aix Marseille Univ, Fac Pharm, INSERM, UMR CRO2 911, F-13285 Marseille 05, France.
   [Verdier-Pinard, Pascal; Horwitz, Susan Band] Albert Einstein Coll Med, Dept Mol Pharmacol, Bronx, NY 10461 USA.
   [Xiao, Hui; Burd, Berta; Miller, Leah M.; Angeletti, Ruth H.] Albert Einstein Coll Med, Lab Macromol Anal & Proteom, Bronx, NY 10461 USA.
RP Verdier-Pinard, P (corresponding author), Aix Marseille Univ, Fac Pharm, INSERM, UMR CRO2 911, 27 Bd Jean Moulin, F-13285 Marseille 05, France.
EM pascal.verdier-pinard@pharmacie.univ-mrs.fr
RI Pasquier, Eddy/A-8112-2018
OI lafitte, daniel/0000-0001-9921-7522; Villard,
   claude/0000-0002-6600-0762; Verdier-Pinard, Pascal/0000-0002-6149-6578;
   Pasquier, Eddy/0000-0003-2824-5002
FU INCa-Canceropole PACA; NIHUnited States Department of Health & Human
   ServicesNational Institutes of Health (NIH) - USA [CA077263, CA124898,
   CA125923]; National Foundation for Cancer Research; Cancer Institute New
   South Wales;  [ANR-05-BLAN-SPV00551];  [CA110150]; NATIONAL CANCER
   INSTITUTEUnited States Department of Health & Human ServicesNational
   Institutes of Health (NIH) - USANIH National Cancer Institute (NCI)
   [F32CA125923, R01CA077263, R01CA124898] Funding Source: NIH RePORTER
FX This work was supported by ANR-05-BLAN-SPV00551 (to D.L) and
   INCa-Canceropole PACA 2003 (Plateforme Proteomique Timone; to D.B) and
   NIH grants CA077263 and CA124898, and the National Foundation for Cancer
   Research (to S.B.H.) and CA110150 (to R.H.A). E.P. is Supported by a
   Cancer Institute New South Wales Early Career Development Fellowship.
   L.M.M. is supported by an NIH postdoctoral fellowship (CA125923).
CR Adrain C, 2006, J BIOL CHEM, V281, P8118, DOI 10.1074/jbc.M509361200
   AKHMANOVA A, 2008, NAT REV CELL BIOL
   ALEXANDER JE, 1991, P NATL ACAD SCI USA, V88, P4685, DOI 10.1073/pnas.88.11.4685
   Badin-Larcon AC, 2004, P NATL ACAD SCI USA, V101, P5577, DOI 10.1073/pnas.0307917101
   BANERJEE A, 1988, J BIOL CHEM, V263, P3029
   Banerjee A, 2008, CELL MOTIL CYTOSKEL, V65, P505, DOI 10.1002/cm.20280
   Bloom K, 2004, P NATL ACAD SCI USA, V101, P6839, DOI 10.1073/pnas.0401266101
   Bonnet C, 2001, J BIOL CHEM, V276, P12839, DOI 10.1074/jbc.M011380200
   BOUCHER D, 1994, BIOCHEMISTRY-US, V33, P12471, DOI 10.1021/bi00207a014
   CLEVELAND DW, 1985, ANNU REV BIOCHEM, V54, P331, DOI 10.1146/annurev.bi.54.070185.001555
   EDDE B, 1992, BIOCHEMISTRY-US, V31, P403, DOI 10.1021/bi00117a014
   Erck C, 2003, CYTOGENET GENOME RES, V101, P47, DOI 10.1159/000073418
   Erck C, 2005, P NATL ACAD SCI USA, V102, P7853, DOI 10.1073/pnas.0409626102
   Fenselau C, 2007, J CHROMATOGR B, V855, P14, DOI 10.1016/j.jchromb.2006.10.071
   Fourest-Lieuvin A, 2006, MOL BIOL CELL, V17, P1041, DOI 10.1091/mbc.E05-07-0621
   Freson K, 2005, BLOOD, V106, P2356, DOI 10.1182/blood-2005-02-0723
   GUNDERSEN GG, 1989, J CELL BIOL, V109, P2275, DOI 10.1083/jcb.109.5.2275
   GUNDERSEN GG, 1987, J CELL BIOL, V105, P251, DOI 10.1083/jcb.105.1.251
   HAMEL E, 1981, ARCH BIOCHEM BIOPHYS, V209, P29, DOI 10.1016/0003-9861(81)90253-8
   He LF, 2001, MOL CANCER THER, V1, P3
   Honore S, 2005, CELL MOL LIFE SCI, V62, P3039, DOI 10.1007/s00018-005-5330-x
   HOYLE HD, 1990, J CELL BIOL, V111, P1009, DOI 10.1083/jcb.111.3.1009
   Hutchens JA, 1997, MOL BIOL CELL, V8, P481, DOI 10.1091/mbc.8.3.481
   Ikegami K, 2007, P NATL ACAD SCI USA, V104, P3213, DOI 10.1073/pnas.0611547104
   Jai-nhuknan J, 1998, ANAL CHEM, V70, P5122, DOI 10.1021/ac980577n
   Janke C, 2005, SCIENCE, V308, P1758, DOI 10.1126/science.1113010
   Katsetos CD, 2003, CELL MOTIL CYTOSKEL, V55, P77, DOI 10.1002/cm.10116
   Keays DA, 2007, CELL, V128, P45, DOI 10.1016/j.cell.2006.12.017
   Khodiyar VK, 2007, GENOMICS, V90, P285, DOI 10.1016/j.ygeno.2007.04.008
   Lafanechere L, 2000, NEUROCHEM RES, V25, P11, DOI 10.1023/A:1007575012904
   Larcher JC, 1996, J BIOL CHEM, V271, P22117, DOI 10.1074/jbc.271.36.22117
   Lefievre L, 2007, PROTEOMICS, V7, P3066, DOI 10.1002/pmic.200700254
   Luduena RF, 1998, INT REV CYTOL, V178, P207
   Mann M, 2006, NAT REV MOL CELL BIO, V7, P952, DOI 10.1038/nrm2067
   Martello LA, 2003, CANCER RES, V63, P1207
   Mary J, 1996, J BIOL CHEM, V271, P9928, DOI 10.1074/jbc.271.17.9928
   MARY J, 1994, FEBS LETT, V353, P89, DOI 10.1016/0014-5793(94)01018-8
   Mialhe A, 2001, CANCER RES, V61, P5024
   Miller LM, 2008, BIOCHEMISTRY-US, V47, P7572, DOI 10.1021/bi8005225
   Moody SA, 1996, J COMP NEUROL, V364, P219, DOI 10.1002/(SICI)1096-9861(19960108)364:2<219::AID-CNE3>3.0.CO;2-8
   Nogales E, 2001, ANNU REV BIOPH BIOM, V30, P397, DOI 10.1146/annurev.biophys.30.1.397
   Olson MT, 2008, J AM SOC MASS SPECTR, V19, P367, DOI 10.1016/j.jasms.2007.11.012
   Ong Shao-En, 2007, Methods Mol Biol, V359, P37
   Orr GA, 2003, ONCOGENE, V22, P7280, DOI 10.1038/sj.onc.1206934
   Pamplona R, 2005, J BIOL CHEM, V280, P21522, DOI 10.1074/jbc.M502255200
   Peris L, 2006, J CELL BIOL, V174, P839, DOI 10.1083/jcb.200512058
   Raff EC, 2000, CURR BIOL, V10, P1391, DOI 10.1016/S0960-9822(00)00784-3
   Rao S, 2001, BIOCHEMISTRY-US, V40, P2096, DOI 10.1021/bi002323d
   REDEKER V, 1991, J BIOL CHEM, V266, P23461
   Redeker V, 1996, J NEUROCHEM, V67, P2104
   Redeker V, 2005, J BIOL CHEM, V280, P596, DOI 10.1074/jbc.M408324200
   Redeker V, 2004, BIOCHEMISTRY-US, V43, P12265, DOI 10.1021/bi049070z
   REDEKER V, 1992, FEBS LETT, V313, P185, DOI 10.1016/0014-5793(92)81441-N
   Redeker V, 1998, BIOCHEMISTRY-US, V37, P14838, DOI 10.1021/bi981335k
   REDEKER V, 1994, SCIENCE, V266, P1688, DOI 10.1126/science.7992051
   Rodriguez OC, 2003, NAT CELL BIOL, V5, P599, DOI 10.1038/ncb0703-599
   Rosas-Acosta G, 2005, MOL CELL PROTEOMICS, V4, P56, DOI 10.1074/mcp.M400149-MCP200
   RUDIGER A, 1995, ANAL BIOCHEM, V224, P532, DOI 10.1006/abio.1995.1083
   Rudiger AH, 1999, ANAL BIOCHEM, V275, P162, DOI 10.1006/abio.1999.4319
   RUDIGER M, 1993, EUR J BIOCHEM, V218, P107, DOI 10.1111/j.1432-1033.1993.tb18357.x
   RUDIGER M, 1992, FEBS LETT, V308, P101, DOI 10.1016/0014-5793(92)81061-P
   RUDIGER M, 1995, FEBS LETT, V364, P147, DOI 10.1016/0014-5793(95)00373-H
   SACKETT DL, 1995, ANAL BIOCHEM, V228, P343, DOI 10.1006/abio.1995.1361
   SAVAGE C, 1989, GENE DEV, V3, P870, DOI 10.1101/gad.3.6.870
   Schulze H, 2004, BLOOD, V104, P3949, DOI 10.1182/blood-2004-03-1179
   Schwer HD, 2001, CURR BIOL, V11, P579, DOI 10.1016/S0960-9822(01)00153-1
   Seve P, 2008, LANCET ONCOL, V9, P168, DOI 10.1016/S1470-2045(08)70029-9
   SHELANSK.ML, 1973, P NATL ACAD SCI USA, V70, P765, DOI 10.1073/pnas.70.3.765
   Stephens RE, 1998, ANAL BIOCHEM, V265, P356, DOI 10.1006/abio.1998.2909
   STEPHENS RE, 1995, METHOD CELL BIOL, V47, P361, DOI 10.1016/S0091-679X(08)60830-4
   Strausberg RL, 2002, P NATL ACAD SCI USA, V99, P16899, DOI 10.1073/pnas.242603899
   Thazhath R, 2002, NAT CELL BIOL, V4, P256, DOI 10.1038/ncb764
   VALLEE RB, 1982, J CELL BIOL, V92, P435, DOI 10.1083/jcb.92.2.435
   van Dijk J, 2007, MOL CELL, V26, P437, DOI 10.1016/j.molcel.2007.04.012
   Verdier-Pinard P, 2005, BIOCHEMISTRY-US, V44, P15858, DOI 10.1021/bi051004p
   Verdier-Pinard P, 2003, BIOCHEMISTRY-US, V42, P12019, DOI 10.1021/bi0350147
   Verdier-Pinard P, 2003, BIOCHEMISTRY-US, V42, P5349, DOI 10.1021/bi027293o
   Verhey KJ, 2007, CELL CYCLE, V6, P2152, DOI 10.4161/cc.6.17.4633
   Verrills NM, 2003, J BIOL CHEM, V278, P45082, DOI 10.1074/jbc.M303378200
   Vinh J, 1997, ANAL CHEM, V69, P3979, DOI 10.1021/ac970449j
   Vinh J, 1999, BIOCHEMISTRY-US, V38, P3133, DOI 10.1021/bi982304s
   Westermann S, 2003, NAT REV MOL CELL BIO, V4, P938, DOI 10.1038/nrm1260
   Yang CPH, 2005, MOL CANCER THER, V4, P987, DOI 10.1158/1535-7163.MCT-05-0024
NR 83
TC 53
Z9 56
U1 1
U2 20
PU ACADEMIC PRESS INC ELSEVIER SCIENCE
PI SAN DIEGO
PA 525 B ST, STE 1900, SAN DIEGO, CA 92101-4495 USA
SN 0003-2697
J9 ANAL BIOCHEM
JI Anal. Biochem.
PD JAN 15
PY 2009
VL 384
IS 2
BP 197
EP 206
DI 10.1016/j.ab.2008.09.020
PG 10
WC Biochemical Research Methods; Biochemistry & Molecular Biology;
   Chemistry, Analytical
WE Science Citation Index Expanded (SCI-EXPANDED)
SC Biochemistry & Molecular Biology; Chemistry
GA 384VQ
UT WOS:000261772700001
PM 18840397
OA Green Accepted
DA 2022-04-10
ER

PT J
AU O'Connor, MJ
   Martin, NMB
   Smith, GCM
AF O'Connor, M. J.
   Martin, N. M. B.
   Smith, G. C. M.
TI Targeted cancer therapies based on the inhibition of DNA strand break
   repair
SO ONCOGENE
LA English
DT Review
DE DNA-PK; ATM; PARP; CHK1; CHK2
ID DEPENDENT PROTEIN-KINASE; HUMAN POLYNUCLEOTIDE KINASE; 3-KINASE RELATED
   KINASES; SMALL-MOLECULE INHIBITOR; ADP-RIBOSE POLYMERASE;
   POLY(ADP-RIBOSE) POLYMERASE; RADIOSENSITIZING AGENT; SELECTIVE
   INHIBITOR; SYNTHETIC LETHALITY; ATM ACTIVATION
AB Both DNA double- and single-strand break repair are highly coordinated processes utilizing signal transduction cascades and post-translational modification such as phosphorylation, acetylation and ADP ribosylation. 'Drugable' target within these networks have been identified that could potentially lead to novel therapeutic approaches within the oncology arena. Key regulators within these signalling cascades, such as DNA-dependent protein kinase, ataxia-telangiectasia mutated, checkpoint kinase 1 (CHK1), checkpoint kinase 2 (CHK2) and poly( ADPribose) polymerase, use either ATP or nicotinamide adenine dinucleotide for their enzymatic functions and are therefore readily accessible to small molecule inhibition at their catalytic sites. A range of highly potent and selective inhibitor of these DNA damage response pathway has now been identified through drug discovery efforts, with candidate molecules either approaching or already in clinical trials. This review will describe the small molecule inhibitor and drug discovery activities that focus on DNA break repair, along with the therapeutic rationale behind chemosensitization and the concept of synthetic lethality. We will also describe the emerging clinical data coming from this exciting new approach to targeted cancer therapy.
C1 KuDOS Pharmaceut Ltd, Cambridge CB4 0PE, England.
RP Smith, GCM (corresponding author), KuDOS Pharmaceut Ltd, 410 Cambridge Sci Pk,Milton Rd, Cambridge CB4 0PE, England.
EM gcmsmith@kudospharma.co.uk
CR Abraham RT, 2001, GENE DEV, V15, P2177, DOI 10.1101/gad.914401
   Abrahamsson PA, 2004, EUR UROL SUPPL, V3, P3, DOI 10.1016/j.eursup.2004.09.001
   Albertella MR, 2005, CANCER RES, V65, P9799, DOI 10.1158/0008-5472.CAN-05-1095
   Albertella MR, 2005, DNA REPAIR, V4, P583, DOI 10.1016/j.dnarep.2005.01.005
   Arienti KL, 2005, J MED CHEM, V48, P1873, DOI 10.1021/jm0495935
   Austen B, 2005, BLOOD, V106, P3175, DOI 10.1182/blood-2004-11-4516
   Bartek J, 2003, CANCER CELL, V3, P421, DOI 10.1016/S1535-6108(03)00110-7
   Bartkova J, 2005, CELL CYCLE, V4, P838, DOI 10.4161/cc.4.6.1742
   Bartkova J, 2005, NATURE, V434, P864, DOI 10.1038/nature03482
   Bonicalzi ME, 2005, CELL MOL LIFE SCI, V62, P739, DOI 10.1007/s00018-004-4505-1
   Bryant HE, 2005, NATURE, V434, P913, DOI 10.1038/nature03443
   Calabrese CR, 2004, J NATL CANCER I, V96, P56, DOI 10.1093/jnci/djh005
   Carlessi L, 2007, MOL CANCER THER, V6, P935, DOI 10.1158/1535-7163.MCT-06-0567
   Chalmers A, 2004, INT J RADIAT ONCOL, V58, P410, DOI 10.1016/j.ijrobp.2003.09.053
   Chappell C, 2002, EMBO J, V21, P2827, DOI 10.1093/emboj/21.11.2827
   Curtin Nicola J., 2005, Expert Reviews in Molecular Medicine, V7, P1, DOI 10.1017/S146239940500904X
   D'Amours D, 1999, BIOCHEM J, V342, P249, DOI 10.1042/0264-6021:3420249
   De Soto JA, 2006, INT J BIOL SCI, V2, P179
   deMurcia JM, 1997, P NATL ACAD SCI USA, V94, P7303, DOI 10.1073/pnas.94.14.7303
   DURKACZ BW, 1980, NATURE, V283, P593, DOI 10.1038/283593a0
   Evans AR, 2000, MUTAT RES-DNA REPAIR, V461, P83, DOI 10.1016/S0921-8777(00)00046-X
   Farmer H, 2005, NATURE, V434, P917, DOI 10.1038/nature03445
   Fedier A, 2004, INT J ONCOL, V24, P1039
   FONG PC, 2006, J CLIN ONCOL, V24, pA3022
   Gorgoulis VG, 2005, NATURE, V434, P907, DOI 10.1038/nature03485
   Hardcastle IR, 2005, J MED CHEM, V48, P7829, DOI 10.1021/jm050444b
   Hartman JL, 2001, SCIENCE, V291, P1001, DOI 10.1126/science.291.5506.1001
   HARTWELL LH, 1989, SCIENCE, V246, P629, DOI 10.1126/science.2683079
   Hay T, 2005, CANCER RES, V65, P10145, DOI 10.1158/0008-5472.CAN-05-1186
   Hickson I, 2004, CANCER RES, V64, P9152, DOI 10.1158/0008-5472.CAN-04-2727
   Hoeijmakers JHJ, 2001, NATURE, V411, P366, DOI 10.1038/35077232
   Hollick JJ, 2007, J MED CHEM, V50, P1958, DOI 10.1021/jm061121y
   Hu HY, 2004, J BIOL CHEM, V279, P39736, DOI 10.1074/jbc.M402842200
   Ismail IH, 2004, ONCOGENE, V23, P873, DOI 10.1038/sj.onc.1207303
   Izzard RA, 1999, CANCER RES, V59, P2581
   Jackson SP, 2001, BIOCHEM SOC T, V29, P655, DOI 10.1042/0300-5127:0290655
   Janetka JW, 2007, CURR OPIN DRUG DISC, V10, P473
   Jazayeri A, 2006, NAT CELL BIOL, V8, P37, DOI 10.1038/ncb1337
   Jeggo PA, 1998, RADIAT RES, V150, pS80, DOI 10.2307/3579810
   Kaelin WG, 2005, NAT REV CANCER, V5, P689, DOI 10.1038/nrc1691
   Karimi-Busheri F, 2007, CANCER RES, V67, P6619, DOI 10.1158/0008-5472.CAN-07-0480
   Kawabe T, 2004, MOL CANCER THER, V3, P513
   Kennedy RD, 2007, J CLIN INVEST, V117, P1440, DOI 10.1172/JCI31245
   Kennedy RD, 2006, J CLIN ONCOL, V24, P3799, DOI 10.1200/JCO.2005.05.4171
   Koberle B, 1999, CURR BIOL, V9, P273, DOI 10.1016/S0960-9822(99)80118-3
   Krokan HE, 2007, DNA REPAIR, V6, P397, DOI 10.1016/j.dnarep.2006.10.007
   Kurz EU, 2004, DNA REPAIR, V3, P889, DOI 10.1016/j.dnarep.2004.03.029
   Lau A, 2005, NAT CELL BIOL, V7, P493, DOI 10.1038/ncb1250
   Lavin MF, 2007, CELL CYCLE, V6, P931, DOI 10.4161/cc.6.8.4180
   LINDAHL T, 1993, NATURE, V362, P709, DOI 10.1038/362709a0
   Liu Lili, 2004, Curr Opin Investig Drugs, V5, P623
   LUCCHESI JC, 1968, GENETICS, V59, P37
   Lynch HT, 1999, J MED GENET, V36, P801
   Madhusudan S, 2005, NUCLEIC ACIDS RES, V33, P4711, DOI 10.1093/nar/gki781
   MALKIN D, 1990, SCIENCE, V250, P1233, DOI 10.1126/science.1978757
   Masutani M, 2000, MUTAT RES-REV MUTAT, V462, P159, DOI 10.1016/S1383-5742(00)00033-8
   Matsuoka S, 2007, SCIENCE, V316, P1160, DOI 10.1126/science.1140321
   McCabe N, 2005, CANCER BIOL THER, V4, P934, DOI 10.4161/cbt.4.9.2141
   McCabe N, 2006, CANCER RES, V66, P8109, DOI 10.1158/0008-5472.CAN-06-0140
   Miknyoczki SJ, 2003, MOL CANCER THER, V2, P371
   Muller C, 1998, BLOOD, V92, P2213, DOI 10.1182/blood.V92.7.2213.2213_2213_2219
   Nghiem P, 2001, P NATL ACAD SCI USA, V98, P9092, DOI 10.1073/pnas.161281798
   PLUMMER R, 2006, J CLIN ONCOL, V24, pA8013
   PLUMMER R, 2005, J CLIN ONCOL ASCO AN, V23, pA3065
   POWELL SN, 1995, CANCER RES, V55, P1643
   Ratnam K, 2007, CLIN CANCER RES, V13, P1383, DOI 10.1158/1078-0432.CCR-06-2260
   Riballo E, 2004, MOL CELL, V16, P715, DOI 10.1016/j.molcel.2004.10.029
   Sarkaria JN, 1999, CANCER RES, V59, P4375
   Sarkaria JN, 1998, CANCER RES, V58, P4375
   Shimizu N, 2000, NAT BIOTECHNOL, V18, P877, DOI 10.1038/78496
   Shinohara ET, 2005, CANCER RES, V65, P4987, DOI 10.1158/0008-5472.CAN-04-4250
   Shiobara M, 2001, J GASTROEN HEPATOL, V16, P338, DOI 10.1046/j.1440-1746.2001.02378.x
   Smith G.C.M., 2003, HDB CELL SIGNALING, V1, P557
   Smith GCM, 1999, GENE DEV, V13, P916, DOI 10.1101/gad.13.8.916
   Southan GJ, 2003, CURR MED CHEM, V10, P321, DOI 10.2174/0929867033368376
   SRIVASTAVA S, 1990, NATURE, V348, P747, DOI 10.1038/348747a0
   Stiff T, 2006, EMBO J, V25, P5775, DOI 10.1038/sj.emboj.7601446
   TOMODA T, 1991, AM J HEMATOL, V37, P223, DOI 10.1002/ajh.2830370402
   Virag L, 2002, PHARMACOL REV, V54, P375, DOI 10.1124/pr.54.3.375
   Won JJ, 2006, NAT CHEM BIOL, V2, P369, DOI 10.1038/nchembio800
   Yang S, 2005, MOL CANCER THER, V4, P1923, DOI 10.1158/1535-7163.MCT-05-0229
   YAP TA, 2007, J CLIN ONCOL ASCO 1, V25, pA3529
   Zhao Y, 2006, CANCER RES, V66, P5354, DOI 10.1158/0008-5472.CAN-05-4275
   Zou L, 2003, SCIENCE, V300, P1542, DOI 10.1126/science.1083430
NR 84
TC 112
Z9 114
U1 0
U2 3
PU NATURE PUBLISHING GROUP
PI LONDON
PA MACMILLAN BUILDING, 4 CRINAN ST, LONDON N1 9XW, ENGLAND
SN 0950-9232
EI 1476-5594
J9 ONCOGENE
JI Oncogene
PD DEC 10
PY 2007
VL 26
IS 56
BP 7816
EP 7824
DI 10.1038/sj.onc.1210879
PG 9
WC Biochemistry & Molecular Biology; Oncology; Cell Biology; Genetics &
   Heredity
WE Science Citation Index Expanded (SCI-EXPANDED)
SC Biochemistry & Molecular Biology; Oncology; Cell Biology; Genetics &
   Heredity
GA 239SL
UT WOS:000251537900013
PM 18066095
OA Bronze
DA 2022-04-10
ER

PT J
AU Sievert, H
   Pallmann, N
   Miller, KK
   Hermans-Borgmeyer, I
   Venz, S
   Sendoel, A
   Preukschas, M
   Schweizer, M
   Boettcher, S
   Janiesch, PC
   Streichert, T
   Walther, R
   Hengartner, MO
   Manz, MG
   Brummendorf, TH
   Bokemeyer, C
   Braig, M
   Hauber, J
   Duncan, KE
   Balabanov, S
AF Sievert, Henning
   Paellmann, Nora
   Miller, Katharine K.
   Hermans-Borgmeyer, Irm
   Venz, Simone
   Sendoel, Ataman
   Preukschas, Michael
   Schweizer, Michaela
   Boettcher, Steffen
   Janiesch, P. Christoph
   Streichert, Thomas
   Walther, Reinhard
   Hengartner, Michael O.
   Manz, Markus G.
   Bruemmendorf, Tim H.
   Bokemeyer, Carsten
   Braig, Melanie
   Hauber, Joachim
   Duncan, Kent E.
   Balabanov, Stefan
TI A novel mouse model for inhibition of DOHH-mediated hypusine
   modification reveals a crucial function in embryonic development,
   proliferation and oncogenic transformation
SO DISEASE MODELS & mechanism
LA English
DT Article
DE Hypusine modification; Translational control; Cancer; Mouse models
ID YEAST SACCHAROMYCES-CEREVISIAE; INITIATION-FACTOR 5A;
   AMINO-ACID-RESIDUES; ELONGATION-FACTOR P; FACTOR EF-P; TRANSLATION
   INITIATION; PROTEIN-SYNTHESIS; DEOXYHYPUSINE HYDROXYLASE;
   CAENORHABDITIS-ELEGANS; cell cycle
AB The central importance of translational control by post-translational modification has spurred major interest in regulatory pathway that control translation. One such pathway uniquely adds hypusine to eukaryotic initiation factor 5A (eIF5A), and thereby affects protein synthesis and, subsequently, cellular proliferation through an unknown mechanism. Using a novel conditional knockout mouse model and a Caenorhabditis elegans knockout model, we found an evolutionarily conserved role for the DOHH-mediated second step of hypusine synthesis in early embryonic development. At the cellular level, we observed reduced proliferation and induction of senescence in 3T3 Dohh(-/-) cells as well as reduced capability for malignant transformation. Furthermore, mass spectrometry showed that deletion of DOHH results in an unexpected complete loss of hypusine modification. Our results provide new biological insight into the physiological roles of the second step of the hypusination of eIF5A. Moreover, the conditional mouse model presented here provides a powerful tool for manipulating hypusine modification in a temporal and spatial manner, to analyse both how this unique modification normally functions in vivo as well as how it contributes to different pathological conditions.
C1 [Sievert, Henning; Paellmann, Nora; Preukschas, Michael; Bokemeyer, Carsten; Braig, Melanie; Balabanov, Stefan] Univ Hosp Eppendorf, Hubertus Wald Tumor Zentrum, Sect Pneumol, Dept Oncol Hematol & Bone Marrow Transplant, D-20246 Hamburg, Germany.
   [Paellmann, Nora; Hauber, Joachim] Leibniz Inst Expt Virol, Heinrich Pette Inst, D-20251 Hamburg, Germany.
   [Miller, Katharine K.; Hermans-Borgmeyer, Irm; Schweizer, Michaela; Janiesch, P. Christoph; Duncan, Kent E.] Univ Med Ctr Hamburg Eppendorf UKE, Ctr Mol Neurobiol ZMNH, D-20251 Hamburg, Germany.
   [Venz, Simone; Walther, Reinhard] Ernst Moritz Arndt Univ Greifswald, Dept Med Biochem & Mol Biol, D-17475 Greifswald, Germany.
   [Sendoel, Ataman; Hengartner, Michael O.] Univ Zurich, Inst Mol Life Sci, CH-8057 Zurich, Switzerland.
   [Sendoel, Ataman; Boettcher, Steffen; Manz, Markus G.; Balabanov, Stefan] Univ Zurich Hosp, Div Hematol, CH-8091 Zurich, Switzerland.
   [Streichert, Thomas] Univ Hosp Cologne, Dept Clin Chem, D-50924 Cologne, Germany.
   [Bruemmendorf, Tim H.] Univ Hosp RWTH Aachen, Clin Internal Med 4, D-52074 Aachen, Germany.
RP Balabanov, S (corresponding author), Univ Hosp Eppendorf, Hubertus Wald Tumor Zentrum, Sect Pneumol, Dept Oncol Hematol & Bone Marrow Transplant, D-20246 Hamburg, Germany.
EM stefan.balabanov@usz.ch
RI Miller, Katharine K/O-6804-2015; Balabanov, Stefan/E-9765-2014
OI Miller, Katharine K/0000-0002-0690-7426; Manz,
   Markus/0000-0002-4676-7931; Boettcher, Steffen/0000-0001-9937-0957;
   Hengartner, Michael/0000-0002-7584-596X; Sendoel,
   Ataman/0000-0002-0381-9965
FU Deutsche Forschungsgemeinschaft (DFG)German Research Foundation (DFG)
   [BA 3506/1-1, HA 2580/4-1]; Eppendorfer Krebs- und Leukamiehilfe e.V.;
   Alzheimer's Research Scholarship from the Hans und Ilse Breuer
   Foundation; Fritz Thyssen Foundation
FX This project was funded by the Deutsche Forschungsgemeinschaft (DFG) [BA
   3506/1-1 and HA 2580/4-1 to S. B. and J.H.] and the Eppendorfer Krebs-
   und Leukamiehilfe e.V. to S. B. K. K. M. is the recipient of an
   Alzheimer's Research Scholarship from the Hans und Ilse Breuer
   Foundation. P.C.J. is supported in part by a grant from the Fritz
   Thyssen Foundation to K.E.D.
CR ABBRUZZESE A, 1986, J BIOL CHEM, V261, P3085
   Bailly M, 2010, BIOL DIRECT, V5, DOI 10.1186/1745-6150-5-3
   Balabanov S, 2007, BLOOD, V109, P1701, DOI 10.1182/blood-2005-03-037648
   Balabanov S, 2011, PLOS ONE, V6, DOI 10.1371/journal.pone.0019164
   Barna M, 2008, NATURE, V456, P971, DOI 10.1038/nature07449
   BENNE R, 1978, J BIOL CHEM, V253, P3070
   Bevec D, 1996, SCIENCE, V271, P1858, DOI 10.1126/science.271.5257.1858
   Bordeleau ME, 2008, J CLIN INVEST, V118, P2651, DOI 10.1172/JCI34753
   Braig M, 2005, NATURE, V436, P660, DOI 10.1038/nature03841
   BRENNER S, 1974, GENETICS, V77, P71
   Caraglia M, 2013, AMINO ACIDS, V44, P103, DOI 10.1007/s00726-011-1182-x
   Castelli LM, 2011, MOL BIOL CELL, V22, P3379, DOI 10.1091/mbc.E11-02-0153
   Clement PMJ, 2003, EUR J BIOCHEM, V270, P4254, DOI 10.1046/j.1432-1033.2003.03806.x
   Coller HA, 2000, P NATL ACAD SCI USA, V97, P3260, DOI 10.1073/pnas.97.7.3260
   COOPER HL, 1982, CELL, V29, P791, DOI 10.1016/0092-8674(82)90441-X
   Doerfel LK, 2013, SCIENCE, V339, P85, DOI 10.1126/science.1229017
   DONZE O, 1995, EMBO J, V14, P3828, DOI 10.1002/j.1460-2075.1995.tb00052.x
   Dyshlovoy SA, 2012, J PROTEOME RES, V11, P2316, DOI 10.1021/pr300170p
   Enard W, 2009, CELL, V137, P961, DOI 10.1016/j.cell.2009.03.041
   FALCONE G, 1987, EXP CELL RES, V168, P273, DOI 10.1016/0014-4827(87)90435-6
   Furic L, 2010, P NATL ACAD SCI USA, V107, P14134, DOI 10.1073/pnas.1005320107
   Geerts D, 2010, INT J CANCER, V126, P2012, DOI 10.1002/ijc.25074
   Gregio APB, 2009, BIOCHEM BIOPH RES CO, V380, P785, DOI 10.1016/j.bbrc.2009.01.148
   Grewal SS, 2005, NAT CELL BIOL, V7, P295, DOI 10.1038/ncb1223
   Guan XY, 2001, CANCER RES, V61, P3806
   Gutierrez E, 2013, MOL CELL, V51, P35, DOI 10.1016/j.molcel.2013.04.021
   HANAUSKEABEL HM, 1994, BBA-MOL CELL RES, V1221, P115, DOI 10.1016/0167-4889(94)90003-5
   Hanazawa M, 2004, MECH DEVELOP, V121, P213, DOI 10.1016/j.mod.2004.02.001
   Hauber I, 2005, J CLIN INVEST, V115, P76, DOI 10.1172/JCI200521949
   Hauber J, 2010, J CLIN INVEST, V120, P1806, DOI 10.1172/JCI43237
   He LR, 2011, INT J CANCER, V129, P143, DOI 10.1002/ijc.25669
   Henderson A, 2011, P NATL ACAD SCI USA, V108, P6415, DOI 10.1073/pnas.1008150108
   Jenkins ZA, 2001, GENOMICS, V71, P101, DOI 10.1006/geno.2000.6418
   Junker H, 2011, PLOS ONE, V6, DOI 10.1371/journal.pone.0021867
   KANG HA, 1994, J BIOL CHEM, V269, P3934
   Kang KR, 2007, J BIOL CHEM, V282, P8300, DOI 10.1074/jbc.M607495200
   KEMPER WM, 1976, J BIOL CHEM, V251, P5551
   Kim YS, 2006, J BIOL CHEM, V281, P13217, DOI 10.1074/jbc.M601081200
   KLIER H, 1995, BIOCHEMISTRY-US, V34, P14693, DOI 10.1021/bi00045a010
   Kruse M, 2000, J EXP MED, V191, P1581, DOI 10.1084/jem.191.9.1581
   Landau G, 2010, J BIOL CHEM, V285, P12474, DOI 10.1074/jbc.M110.106419
   Lipowsky G, 2000, EMBO J, V19, P4362, DOI 10.1093/emboj/19.16.4362
   Livak KJ, 2001, METHODS, V25, P402, DOI 10.1006/meth.2001.1262
   Maier B, 2010, J CLIN INVEST, V120, P2156, DOI 10.1172/JCI38924
   NAGY A, 1993, P NATL ACAD SCI USA, V90, P8424, DOI 10.1073/pnas.90.18.8424
   Navarre WW, 2010, MOL CELL, V39, P209, DOI 10.1016/j.molcel.2010.06.021
   Nishimura K, 2012, AMINO ACIDS, V42, P703, DOI 10.1007/s00726-011-0986-z
   Park JH, 2006, P NATL ACAD SCI USA, V103, P51, DOI 10.1073/pnas.0509348102
   Park MH, 1998, J BIOL CHEM, V273, P1677, DOI 10.1074/jbc.273.3.1677
   PARK MH, 1981, P NATL ACAD SCI-BIOL, V78, P2869, DOI 10.1073/pnas.78.5.2869
   Patel PH, 2009, J CELL BIOL, V185, P1181, DOI 10.1083/jcb.200904161
   Peil L, 2012, NAT CHEM BIOL, V8, P695, DOI [10.1038/NCHEMBIO.1001, 10.1038/nchembio.1001]
   Preukschas M, 2012, PLOS ONE, V7, DOI 10.1371/journal.pone.0043468
   Riccardi C, 2006, NAT PROTOC, V1, P1458, DOI 10.1038/nprot.2006.238
   Robert F, 2009, PLOS ONE, V4, DOI 10.1371/journal.pone.0005428
   Rodriguez CI, 2000, NAT GENET, V25, P139, DOI 10.1038/75973
   Ruggero D, 2013, CSH PERSPECT BIOL, V5, DOI 10.1101/cshperspect.a012336
   Saeed AI, 2006, METHOD ENZYMOL, V411, P134, DOI 10.1016/S0076-6879(06)11009-5
   Saini P, 2009, NATURE, V459, P118, DOI 10.1038/nature08034
   Sasaki K, 1996, FEBS LETT, V384, P151, DOI 10.1016/0014-5793(96)00310-9
   Schrader R, 2006, J BIOL CHEM, V281, P35336, DOI 10.1074/jbc.M601460200
   SCHREIER MH, 1977, J MOL BIOL, V116, P727, DOI 10.1016/0022-2836(77)90268-6
   Schwenk F, 1995, NUCLEIC ACIDS RES, V23, P5080, DOI 10.1093/nar/23.24.5080
   Scuoppo C, 2012, NATURE, V487, P244, DOI 10.1038/nature11126
   Silvera D, 2010, NAT REV CANCER, V10, P254, DOI 10.1038/nrc2824
   Sonnichsen B, 2005, NATURE, V434, P462, DOI 10.1038/nature03353
   Sun Hong, 2007, V383, P311, DOI 10.1007/978-1-59745-335-6_20
   Tang DJ, 2010, HEPATOLOGY, V51, P1255, DOI 10.1002/hep.23451
   Templin AT, 2011, CELL CYCLE, V10, P1043, DOI 10.4161/cc.10.7.15206
   Tholl D, 1998, WORLD J MICROB BIOT, V14, P857, DOI 10.1023/A:1008829008065
   TODARO GJ, 1963, J CELL COMPAR PHYSL, V62, P257, DOI 10.1002/jcp.1030620305
   Ude S, 2013, SCIENCE, V339, P82, DOI 10.1126/science.1228985
   Ummanni R, 2011, MOL CANCER, V10, DOI 10.1186/1476-4598-10-129
   van Riggelen J, 2010, NAT REV CANCER, V10, P301, DOI 10.1038/nrc2819
   Weir BA, 2004, MOL BIOL CELL, V15, P1656, DOI 10.1091/mbc.E03-06-0371
   Wendel HG, 2007, GENE DEV, V21, P3232, DOI 10.1101/gad.1604407
   Wolff EC, 2007, AMINO ACIDS, V33, P341, DOI 10.1007/s00726-007-0525-0
   Xu AG, 2001, J BIOL CHEM, V276, P2555, DOI 10.1074/jbc.M008982200
   Zender L, 2008, CELL, V135, P852, DOI 10.1016/j.cell.2008.09.061
   Zhu W, 2012, GUT, V61, P562, DOI 10.1136/gutjnl-2011-300207
   Zuk D, 1998, EMBO J, V17, P2914, DOI 10.1093/emboj/17.10.2914
NR 81
TC 36
Z9 41
U1 1
U2 6
PU COMPANY OF BIOLOGISTS LTD
PI CAMBRIDGE
PA BIDDER BUILDING CAMBRIDGE COMMERCIAL PARK COWLEY RD, CAMBRIDGE CB4 4DL,
   CAMBS, ENGLAND
SN 1754-8403
EI 1754-8411
J9 DIS MODEL MECH
JI Dis. Model. Mech.
PD AUG
PY 2014
VL 7
IS 8
BP 963
EP 976
DI 10.1242/dmm.014449
PG 14
WC Cell Biology; Pathology
WE Science Citation Index Expanded (SCI-EXPANDED)
SC Cell Biology; Pathology
GA AT5TF
UT WOS:000345004200004
PM 24832488
OA gold, Green Published, Green Accepted
DA 2022-04-10
ER

PT J
AU Arena, G
   Gelmetti, V
   Torosantucci, L
   Vignone, D
   Lamorte, G
   De Rosa, P
   Cilia, E
   Jonas, EA
   Valente, EM
AF Arena, G.
   Gelmetti, V.
   Torosantucci, L.
   Vignone, D.
   Lamorte, G.
   De Rosa, P.
   Cilia, E.
   Jonas, E. A.
   Valente, E. M.
TI PINK1 protects against cell death induced by mitochondrial
   depolarization, by phosphorylating Bcl-xL and impairing its
   pro-apoptotic cleavage
SO CELL DEATH AND DIFFERENTIATION
LA English
DT Article
DE apoptosis; mitochondria; Parkinson's disease; post-translational
   modifications
ID PARKINSONS-DISEASE; FAMILY-MEMBERS; BCL-X(L); AUTOPHAGY; IMPORT; KINASE;
   MUTATIONS; GROWTH; DOMAIN; SITE
AB Mutations in the PINK1 gene are a frequent cause of autosomal recessive Parkinson's disease (PD). PINK1 encodes a mitochondrial kinase with neuroprotective activity, implicated in maintaining mitochondrial homeostasis and function. In concurrence with Parkin, PINK1 regulates mitochondrial trafficking and degradation of damaged mitochondria through mitophagy. Moreover, PINK1 can activate autophagy by interacting with the pro-autophagic protein Beclin-1. Here, we report that, upon mitochondrial depolarization, PINK1 interacts with and phosphorylates Bcl-xL, an anti-apoptotic protein also known to inhibit autophagy through its binding to Beclin-1. PINK1-Bcl-xL interaction does not interfere either with Beclin-1 release from Bcl-xL or the mitophagy pathway; rather it protects against cell death by hindering the pro-apoptotic cleavage of Bcl-xL. Our data provide a functional link between PINK1, Bcl-xL and apoptosis, suggesting a novel mechanism through which PINK1 regulates cell survival. This pathway could be relevant for the pathogenesis of PD as well as other diseases including cancer.
C1 [Arena, G.; Gelmetti, V.; Torosantucci, L.; Vignone, D.; Lamorte, G.; De Rosa, P.; Cilia, E.; Valente, E. M.] IRCCS Casa Sollievo Sofferenza, Neurogenet Unit, Mendel Lab, San Giovanni Rotondo, FG, Italy.
   [Arena, G.; De Rosa, P.] Univ Roma La Sapienza, Dept Mol Med, Rome, Italy.
   [Jonas, E. A.] Yale Univ, Dept Internal Med, New Haven, CT USA.
   [Valente, E. M.] Univ Salerno, Dept Med & Surg, I-84100 Salerno, Italy.
RP Valente, EM (corresponding author), IRCCS Casa Sollievo Sofferenza, Neurogenet Unit, Mendel Lab, Viale Regina Margherita 261, I-00198 Rome, Italy.
EM e.valente@css-mendel.it
RI Arena, Giuseppe/ABE-8093-2021; Valente, Enza Maria/G-2942-2017
OI Arena, Giuseppe/0000-0003-2398-5503; Valente, Enza
   Maria/0000-0002-0600-6820; Lamorte, Giuseppe/0000-0001-9377-7537;
   Torosantucci, Liliana/0000-0003-0311-4874
FU Italian Ministry of HealthMinistry of Health, Italy; Italian Telethon
   FoundationFondazione Telethon [GGP10140]; Italian Ministry of
   Instruction, University and ResearchMinistry of Education, Universities
   and Research (MIUR); NATIONAL INSTITUTE OF NEUROLOGICAL DISORDERS AND
   STROKEUnited States Department of Health & Human ServicesNational
   Institutes of Health (NIH) - USANIH National Institute of Neurological
   Disorders & Stroke (NINDS) [R56NS064967, R01NS064967] Funding Source:
   NIH RePORTER
FX We are grateful to Prof. M Piacentini and Dr. GM Fimia (National
   Institute for Infectious Diseases Lazzaro Spallanzani IRCCS, Rome) for
   their helpful suggestions. This work was supported by grants from the
   Italian Ministry of Health (Ricerca Corrente 2012, Ricerca Finalizzata
   2008, Bando Giovani Ricercatori 2009), the Italian Telethon Foundation
   (GGP10140) and the Italian Ministry of Instruction, University and
   Research (Bando FIRB Accordi di Programma 2010).
CR Belin AC, 2008, FEBS J, V275, P1377, DOI 10.1111/j.1742-4658.2008.06301.x
   Berthier A, 2011, HUM PATHOL, V42, P75, DOI 10.1016/j.humpath.2010.05.016
   Chan EYW, 2009, MOL CELL BIOL, V29, P157, DOI 10.1128/MCB.01082-08
   Chu CT, 2010, HUM MOL GENET, V19, pR28, DOI 10.1093/hmg/ddq143
   Clem RJ, 1998, P NATL ACAD SCI USA, V95, P554, DOI 10.1073/pnas.95.2.554
   Deas E, 2011, HUM MOL GENET, V20, P867, DOI 10.1093/hmg/ddq526
   Du LH, 2005, ONCOGENE, V24, P107, DOI 10.1038/sj.onc.1208189
   Edlich F, 2011, CELL, V145, P104, DOI 10.1016/j.cell.2011.02.034
   Gandhi S, 2009, MOL CELL, V33, P627, DOI 10.1016/j.molcel.2009.02.013
   Gautier CA, 2008, P NATL ACAD SCI USA, V105, P11364, DOI 10.1073/pnas.0802076105
   Geisler S, 2010, NAT CELL BIOL, V12, P119, DOI 10.1038/ncb2012
   Gelmetti V, 2008, MOVEMENT DISORD, V23, P881, DOI 10.1002/mds.21960
   Greene AW, 2012, EMBO REP, V13, P378, DOI 10.1038/embor.2012.14
   He CC, 2010, CURR OPIN CELL BIOL, V22, P140, DOI 10.1016/j.ceb.2010.01.001
   Inzelberg R, 2007, NEUROLOGY, V69, P1542, DOI 10.1212/01.wnl.0000277638.63767.b8
   Jin SM, 2010, J CELL BIOL, V191, P933, DOI 10.1083/jcb.201008084
   Jin Y, 2012, ONCOL REP, V27, P695, DOI 10.3892/or.2011.1543
   Juenemann Katrin, 2012, Int J Cell Biol, V2012, P189794, DOI 10.1155/2012/189794
   Kazi A, 2002, MOL PHARMACOL, V62, P765, DOI 10.1124/mol.62.4.765
   Krajewska M, 2002, CELL DEATH DIFFER, V9, P145, DOI 10.1038/sj.cdd.4400934
   Levine B, 2008, AUTOPHAGY, V4, P600, DOI 10.4161/auto.6260
   Maiuri MC, 2007, EMBO J, V26, P2527, DOI 10.1038/sj.emboj.7601689
   Marongiu R, 2009, J NEUROCHEM, V108, P1561, DOI 10.1111/j.1471-4159.2009.05932.x
   Maya R, 2000, ONCOGENE, V19, P3213, DOI 10.1038/sj.onc.1203658
   Mellor HR, 2010, BIOCHEM PHARMACOL, V79, P1562, DOI 10.1016/j.bcp.2010.01.019
   Michiorri S, 2010, CELL DEATH DIFFER, V17, P962, DOI 10.1038/cdd.2009.200
   Narendra DP, 2010, PLOS BIOL, V8, DOI 10.1371/journal.pbio.1000298
   Ofengeim D, 2012, NAT NEUROSCI, V15, P574, DOI 10.1038/nn.3054
   Plun-Favreau H, 2007, NAT CELL BIOL, V9, P1243, DOI 10.1038/ncb1644
   Poruchynsky MS, 1998, CANCER RES, V58, P3331
   Pridgeon JW, 2007, PLOS BIOL, V5, P1494, DOI 10.1371/journal.pbio.0050172
   Schapira AHV, 2008, LANCET NEUROL, V7, P97, DOI 10.1016/S1474-4422(07)70327-7
   Shimizu S, 2000, P NATL ACAD SCI USA, V97, P3100, DOI 10.1073/pnas.97.7.3100
   Siderowf A, 2003, ANN INTERN MED, V138, P651, DOI 10.7326/0003-4819-138-8-200304150-00013
   Silvestri L, 2005, HUM MOL GENET, V14, P3477, DOI 10.1093/hmg/ddi377
   Tozser J, 2003, BIOCHEM J, V372, P137, DOI 10.1042/BJ20021901
   Unoki M, 2001, ONCOGENE, V20, P4457, DOI 10.1038/sj.onc.1204608
   Upreti M, 2008, J BIOL CHEM, V283, P35517, DOI 10.1074/jbc.M805019200
   Valente EM, 2004, SCIENCE, V304, P1158, DOI 10.1126/science.1096284
   Vives-Bauza C, 2010, P NATL ACAD SCI USA, V107, P378, DOI 10.1073/pnas.0911187107
   Wang XN, 2011, CELL, V147, P893, DOI 10.1016/j.cell.2011.10.018
   Wood-Kaczmar A, 2008, PLOS ONE, V3, DOI 10.1371/journal.pone.0002455
   Zhou FF, 2011, FEBS J, V278, P403, DOI 10.1111/j.1742-4658.2010.07965.x
NR 43
TC 99
Z9 100
U1 1
U2 17
PU NATURE PUBLISHING GROUP
PI LONDON
PA MACMILLAN BUILDING, 4 CRINAN ST, LONDON N1 9XW, ENGLAND
SN 1350-9047
EI 1476-5403
J9 CELL DEATH DIFFER
JI Cell Death Differ.
PD JUL
PY 2013
VL 20
IS 7
BP 920
EP 930
DI 10.1038/cdd.2013.19
PG 11
WC Biochemistry & Molecular Biology; Cell Biology
WE Science Citation Index Expanded (SCI-EXPANDED)
SC Biochemistry & Molecular Biology; Cell Biology
GA 160EO
UT WOS:000320100000012
PM 23519076
OA Green Published, Bronze
DA 2022-04-10
ER

PT J
AU Luconi, M
   Cantini, G
   Serio, M
AF Luconi, Michaela
   Cantini, Giulia
   Serio, Mario
TI Peroxisome proliferator-activated receptor gamma (PPAR gamma): Is the
   genomic activity the only answer?
SO STEROIDS
LA English
DT Article; Proceedings Paper
CT 6th International Meeting on Rapid Responses to Steroid Hormones
CY SEP 02-05, 2009
CL Elche, SPAIN
SP Minist Ciencia & Innovac, Generalitat Valenciana, Univ Miguel Hernandez Elche, Soc Espanola Ciencias Fisiol
DE Nongenomic; Extranuclear; Nuclear steroid receptors; Thiazolidinediones
ID INDUCED ADIPOCYTE HYPERTROPHY; PROTEIN-KINASE; INSULIN-RESISTANCE;
   15-DEOXY-DELTA(12,14)-PROSTAGLANDIN J(2); TRANSCRIPTIONAL ACTIVATION;
   gene expression; ADIPOSE-TISSUE; PHOSPHORYLATION; MICE; FAT
AB Peroxisome proliferator-activated receptor gamma (PPAR gamma) is a member of the nuclear hormone receptor superfamily of transcription factor, widely expressed in the organism, including adipose, vascular and immune cells. Besides the well-known role in lipid/glycidic homeostasis, PPAR gamma has also recently emerged as a key regulator of inflammatory and immune responses. Besides the natural ligands, more potent synthetic agonists of PPAR gamma have been developed, including thiazolidinediones (TZDs), currently used in type 2 diabetes treatment, which also exert anti-inflammatory and anti-neoplastic effects. PPAR gamma mechanism of action has focused considerable attention over the years. This receptor was initially shown to act on gene expression through a direct transcription and an indirect transrepression activity, mainly associated with metabolic and anti-inflammatory effects. Different post-translational modification of the receptor can modulate PPAR gamma activity. More recently, rapid nongenomic activity of TZDs affecting post-translation modifications of extranuclear proteins involved in cell signaling, has been reported. In particular, PPAR gamma can physically interact with protein kinases resulting in a compartment specific recruitment and activity modulation of these enzymes. Among them, ERK can be positively/negatively regulated by PPAR gamma ligands, as in endothelial cells, where TZDs exert anti-inflammatory effects through a novel mechanism involving a rapid inhibition of ERK1/2 phosphorylation/activation. Finally, some of the TZD anti-tumor effects seem to be PPAR gamma-independent, raising the possibility that alternative receptors can act through extranuclear nongenomic pathway.
   In conclusion, different mechanism of action of PPAR gamma seem to coexist in an interacting functional network in the cell, concurring in mediating both pharmacological and natural ligand effects. (C) 2009 Elsevier Inc. All rights reserved.
C1 [Luconi, Michaela; Cantini, Giulia; Serio, Mario] Univ Florence, DENOthe Ctr Excellence Res Transfer & High Educ, Endocrinol Unit, Dept Clin Physiopathol, I-50139 Florence, Italy.
RP Luconi, M (corresponding author), Univ Florence, DENOthe Ctr Excellence Res Transfer & High Educ, Endocrinol Unit, Dept Clin Physiopathol, Viale Pieraccini 6, I-50139 Florence, Italy.
EM m.luconi@dfc.unifi.it
RI Luconi, Michaela/W-9522-2019; Cantini, Giulia/K-7626-2016
OI Luconi, Michaela/0000-0001-5186-064X; CANTINI,
   GIULIA/0000-0002-9159-9199
CR Abella A, 2005, CELL METAB, V2, P239, DOI 10.1016/j.cmet.2005.09.003
   Adams M, 1997, J BIOL CHEM, V272, P5128, DOI 10.1074/jbc.272.8.5128
   Akahoshi T, 2003, ARTHRITIS RHEUM, V48, P231, DOI 10.1002/art.10709
   Akaike M, 2004, MOL CELL BIOL, V24, P8691, DOI 10.1128/MCB.24.19.8691-8704.2004
   Akbiyik F, 2004, BLOOD, V104, P1361, DOI 10.1182/blood-2004-03-0926
   Akiyama TE, 2002, MOL CELL BIOL, V22, P2607, DOI 10.1128/MCB.22.8.2607-2619.2002
   Ali FY, 2009, ARTERIOSCL THROM VAS, V29, P1871, DOI 10.1161/ATVBAHA.109.193367
   Aquila S, 2006, J CELL PHYSIOL, V209, P977, DOI 10.1002/jcp.20807
   Atkins KB, 2009, AM J PHYSIOL-CELL PH, V296, pC1151, DOI 10.1152/ajpcell.00343.2008
   Babaev VR, 2005, ARTERIOSCL THROM VAS, V25, P1647, DOI 10.1161/01.ATV.0000173413.31789.1a
   Barak Y, 1999, MOL CELL, V4, P585, DOI 10.1016/S1097-2765(00)80209-9
   Barak Y, 2007, PPAR RES, V2007, DOI 10.1155/2007/12781
   Belfiore A, 2009, PPAR RES, V2009, DOI 10.1155/2009/830501
   Bell-Parikh LC, 2003, J CLIN INVEST, V112, P945, DOI 10.1172/JCI200318012
   Bova MP, 2005, TOXICOL LETT, V155, P41, DOI 10.1016/j.toxlet.2004.08.009
   Brunmair B, 2004, DIABETES, V53, P1052, DOI 10.2337/diabetes.53.4.1052
   Burgermeister E, 2003, ONCOGENE, V22, P3888, DOI 10.1038/sj.onc.1206625
   Burgermeister E, 2007, CELL CYCLE, V6, P1539, DOI 10.4161/cc.6.13.4453
   Burgermeister E, 2007, MOL CELL BIOL, V27, P803, DOI 10.1128/MCB.00601-06
   Burns KA, 2007, BBA-MOL CELL BIOL L, V1771, P952, DOI 10.1016/j.bbalip.2007.04.018
   Camp HS, 1999, ENDOCRINOLOGY, V140, P392, DOI 10.1210/en.140.1.392
   Cantini G, 2008, PPAR RES, V2008, DOI 10.1155/2008/904041
   Chawla A, 2001, NAT MED, V7, P48, DOI 10.1038/83336
   Colca JR, 2004, AM J PHYSIOL-ENDOC M, V286, pE252, DOI 10.1152/ajpendo.00424.2003
   Daynes RA, 2002, NAT REV IMMUNOL, V2, P748, DOI 10.1038/nri912
   Diep QN, 2002, CIRCULATION, V105, P2296, DOI 10.1161/01.CIR.0000016049.86468.23
   Diradourian C, 2005, BIOCHIMIE, V87, P33, DOI 10.1016/j.biochi.2004.11.010
   Duan SZ, 2007, J CLIN INVEST, V117, P812, DOI 10.1172/JCI28859
   Fajas L, 1997, J BIOL CHEM, V272, P18779, DOI 10.1074/jbc.272.30.18779
   Fediuc S, 2008, J CELL PHYSIOL, V215, P392, DOI 10.1002/jcp.21321
   Feinstein DL, 2005, BIOCHEM PHARMACOL, V70, P177, DOI 10.1016/j.bcp.2005.03.033
   Floyd ZE, 2002, J BIOL CHEM, V277, P4062, DOI 10.1074/jbc.M108473200
   Freedman BD, 2005, J BIOL CHEM, V280, P17118, DOI 10.1074/jbc.M407539200
   Fryer LGD, 2002, J BIOL CHEM, V277, P25226, DOI 10.1074/jbc.M202489200
   Gervois P, 2007, NAT CLIN PRACT ENDOC, V3, P145, DOI 10.1038/ncpendmet0397
   Gras D, 2009, AM J PHYSIOL-LUNG C, V296, pL970, DOI 10.1152/ajplung.90219.2008
   Grommes C, 2004, LANCET ONCOL, V5, P419, DOI 10.1016/S1470-2045(04)01509-8
   Han JK, 2008, CIRCULATION, V118, P1021, DOI 10.1161/CIRCULATIONAHA.108.777169
   Hatton JL, 2008, PPAR RES, V2008, DOI 10.1155/2008/159415
   Hauser S, 2000, J BIOL CHEM, V275, P18527, DOI 10.1074/jbc.M001297200
   He WM, 2003, P NATL ACAD SCI USA, V100, P15712, DOI 10.1073/pnas.2536828100
   Henke BR, 2004, J MED CHEM, V47, P4118, DOI 10.1021/jm030631e
   Hevener AL, 2003, NAT MED, V9, P1491, DOI 10.1038/nm956
   Hietakangas V, 2006, P NATL ACAD SCI USA, V103, P45, DOI 10.1073/pnas.0503698102
   Hosooka T, 2008, NAT MED, V14, P188, DOI 10.1038/nm1706
   Hotamisligil GS, 2006, NATURE, V444, P860, DOI 10.1038/nature05485
   Hu ED, 1996, SCIENCE, V274, P2100, DOI 10.1126/science.274.5295.2100
   Johann AM, 2006, CELL DEATH DIFFER, V13, P1533, DOI 10.1038/sj.cdd.4401832
   Johnstone CN, 2008, MOL CELL BIOL, V28, P687, DOI 10.1128/MCB.01617-06
   Jones JR, 2005, P NATL ACAD SCI USA, V102, P6207, DOI 10.1073/pnas.0306743102
   Kelly D, 2004, NAT IMMUNOL, V5, P104, DOI 10.1038/ni1018
   Knouff C, 2004, ENDOCR REV, V25, P899, DOI 10.1210/er.2003-0036
   Konrad D, 2005, DIABETOLOGIA, V48, P954, DOI 10.1007/s00125-005-1713-7
   Kotarsky K, 2003, BIOCHEM BIOPH RES CO, V301, P406, DOI 10.1016/S0006-291X(02)03064-4
   Koutnikova H, 2003, P NATL ACAD SCI USA, V100, P14457, DOI 10.1073/pnas.2336090100
   Kubota N, 1999, MOL CELL, V4, P597, DOI 10.1016/S1097-2765(00)80210-5
   LeBrasseur NK, 2006, AM J PHYSIOL-ENDOC M, V291, pE175, DOI 10.1152/ajpendo.00453.2005
   Leff T, 2003, BIOCHEM SOC T, V31, P224
   Lehrke M, 2005, CELL, V123, P993, DOI 10.1016/j.cell.2005.11.026
   Lombardi A, 2008, ARTERIOSCL THROM VAS, V28, P718, DOI 10.1161/ATVBAHA.107.160713
   Lombardi A, 2009, EUR J CELL BIOL, V88, P731, DOI 10.1016/j.ejcb.2009.07.004
   Matsusue K, 2003, J CLIN INVEST, V111, P737, DOI 10.1172/JCI200317223
   Migliaccio A, 2007, ONCOGENE, V26, P6619, DOI 10.1038/sj.onc.1210487
   Norris AW, 2003, J CLIN INVEST, V112, P608, DOI 10.1172/JCI200317305
   Ohshima T, 2004, J BIOL CHEM, V279, P29551, DOI 10.1074/jbc.M403866200
   Panigrahy D, 2002, J CLIN INVEST, V110, P923, DOI 10.1172/JCI200215634
   Papageorgiou E, 2008, MOL MED, V14, P403, DOI 10.2119/2008-00021.Papageorgiou
   Papageorgiou E, 2007, EXPERT OPIN THER TAR, V11, P1071, DOI 10.1517/14728222.11.8.1071
   Pascual G, 2005, NATURE, V437, P759, DOI 10.1038/nature03988
   Ropero AB, 2009, J ENDOCRINOL, V200, P127, DOI 10.1677/JOE-08-0397
   Rubbo H, 2008, BBA-GEN SUBJECTS, V1780, P1318, DOI 10.1016/j.bbagen.2008.03.007
   Scatena R, 2008, PPAR RES, V2008, DOI 10.1155/2008/256251
   Shao DL, 1998, NATURE, V396, P377, DOI 10.1038/24634
   Shibuya A, 2002, FEBS LETT, V525, P43, DOI 10.1016/S0014-5793(02)03059-4
   Solomon C, 1999, J CLIN INVEST, V103, P1729, DOI 10.1172/JCI6871
   Song RXD, 2005, TRENDS ENDOCRIN MET, V16, P347, DOI 10.1016/j.tem.2005.06.010
   Straus DS, 2000, P NATL ACAD SCI USA, V97, P4844, DOI 10.1073/pnas.97.9.4844
   Sundvold H, 2001, BIOCHEM BIOPH RES CO, V287, P383, DOI 10.1006/bbrc.2001.5602
   Takeda K, 2001, J BIOL CHEM, V276, P48950, DOI 10.1074/jbc.M108722200
   Tsai YS, 2004, J CLIN INVEST, V114, P240, DOI 10.1172/JCI200420964
   van Beekum O, 2009, OBESITY, V17, P213, DOI 10.1038/oby.2008.473
   von Knethen A, 2007, ARCH IMMUNOL THER EX, V55, P19, DOI 10.1007/s00005-007-0005-y
   Waite KJ, 2001, J BIOL CHEM, V276, P7062, DOI 10.1074/jbc.M007894200
   Weng JR, 2006, ENDOCR-RELAT CANCER, V13, P401, DOI 10.1677/erc.1.01182
   Yang XJ, 2006, MOL CELL, V24, P635, DOI 10.1016/j.molcel.2006.10.031
   Yki-Jarvinen H, 2004, NEW ENGL J MED, V351, P1106, DOI 10.1056/NEJMra041001
   Zhang JF, 2004, P NATL ACAD SCI USA, V101, P10703, DOI 10.1073/pnas.0403652101
   Zhao XR, 2009, J NEUROSCI, V29, P6186, DOI 10.1523/JNEUROSCI.5857-08.2009
NR 88
TC 64
Z9 69
U1 0
U2 5
PU ELSEVIER SCIENCE INC
PI NEW YORK
PA STE 800, 230 PARK AVE, NEW YORK, NY 10169 USA
SN 0039-128X
EI 1878-5867
J9 STEROIDS
JI Steroids
PD AUG-SEP
PY 2010
VL 75
IS 8-9
BP 585
EP 594
DI 10.1016/j.steroids.2009.10.012
PG 10
WC Biochemistry & Molecular Biology; Endocrinology & Metabolism
WE Science Citation Index Expanded (SCI-EXPANDED); Conference Proceedings Citation Index - Science (CPCI-S)
SC Biochemistry & Molecular Biology; Endocrinology & Metabolism
GA 626RR
UT WOS:000279985100014
PM 19900469
DA 2022-04-10
ER

PT J
AU Qing, GY
   Yan, JY
   He, XN
   Li, XL
   Liang, XM
AF Qing, Guangyan
   Yan, Jingyu
   He, Xiangnan
   Li, Xiuling
   Liang, Xinmiao
TI Recent advances in hydrophilic interaction liquid interaction
   chromatography materials for glycopeptide enrichment and glycan
   separation
SO TRAC-TRENDS IN ANALYTICAL CHEMISTRY
LA English
DT Review
DE Hydrophilic interaction liquid interaction chromatography; Glycopeptide
   enrichment; Glycan separation; Zwitterion; Carbohydrate; Amide
ID HIGHLY SELECTIVE ENRICHMENT; SILICA STATIONARY-PHASE; METAL-ORGANIC
   FRAMEWORK; MAGNETIC NANOPARTICLES; EFFICIENT ENRICHMENT; LINKED
   GLYCOpeptide; BRANCHED COPOLYMER; N-GLYCOpeptide; CLICK SYNTHESIS;
   CANCER
AB Glycosylation is one of the most common and important types of protein post-translational modification in mammalian cells. To decode the protein glycosylation, it is highly important to enrich glycopeptide or separate glycans from complex biosamples. Hydrophilic interaction liquid interaction chromatography (HILIC) has inherent advantages in the separation of hydrophilic substances and glycopeptide enrichment. Conventional HILIC display unbiased binding with the hydrophilic solutes, leading to unsatisfactory enrichment selectivity for glycopeptide. In recent three years, many novel HILIC materials, including histidine, dipeptide, maltose, and amide-based ones, were developed and displayed either specific binding capacities toward sialylated glycopeptide, or substantially stronger retention toward neutral glycopeptide. Therefore, HILIC has grown up to be a high-efficiency method for collecting both glycosylation sites and glycan structural information simultaneously. In the review, recent breakthrough of HILIC materials applied to glycopeptide enrichment and glycan separation is summarized, and the future development tendency of the HILIC is suggested. (C) 2019 The Authors. Published by Elsevier B.V.
C1 [Qing, Guangyan; Yan, Jingyu; He, Xiangnan; Li, Xiuling; Liang, Xinmiao] Chinese Acad Sci, Dalian Inst Chem Phys, Key Lab Separat Sci Analyt Chem, 457 Zhongshan Rd, Dalian 116023, Peoples R China.
RP Li, XL; Liang, XM (corresponding author), Chinese Acad Sci, Dalian Inst Chem Phys, Key Lab Separat Sci Analyt Chem, 457 Zhongshan Rd, Dalian 116023, Peoples R China.
EM lixiuling@dicp.ac.cn; liangxm@dicp.ac.cn
RI Qing, Guangyan/Q-5828-2019
OI Qing, Guangyan/0000-0002-4888-9318
FU National Natural Science Foundation of ChinaNational Natural Science
   Foundation of China (NSFC) [21775148, 21775116]; DICP Innovation Funding
   [DICP-RC201801]
FX This work was supported by the National Natural Science Foundation of
   China (21775148, 21775116), DICP Innovation Funding (DICP-RC201801). G.
   Qing acknowledgesWuhan Morning Light Plan of Youth Science and
   Technology.
CR Agrawal P, 2016, GLYCOBIOLOGY, V26, P1447
   Ahn YH, 2015, MASS SPECTROM REV, V34, P148, DOI 10.1002/mas.21428
   ALPERT AJ, 1990, J CHROMATOGR, V499, P177, DOI 10.1016/S0021-9673(00)96972-3
   Alvarez E, 2017, TALANTA, V164, P570, DOI 10.1016/j.talanta.2016.12.001
   Nguyen AT, 2017, CANCER CELL, V32, P639, DOI 10.1016/j.ccell.2017.10.001
   Bi CF, 2015, ACS APPL MATER INTER, V7, P24670, DOI 10.1021/acsami.5b06991
   Bibi A, 2016, TALANTA, V161, P681, DOI 10.1016/j.talanta.2016.09.012
   Cai JF, 2017, J CHROMATOGR A, V1524, P153, DOI 10.1016/j.chroma.2017.10.005
   Cao WQ, 2016, SCI REP-UK, V6, DOI 10.1038/srep29776
   Chen YJ, 2015, NANOSCALE, V7, P3100, DOI 10.1039/c4nr05955g
   Chen ZW, 2018, ANALYST, V143, P2508, DOI 10.1039/c8an00216a
   Cummings RD, 2014, CHEM BIOL, V21, P1, DOI 10.1016/j.chembiol.2013.12.010
   Ding P, 2015, CHEM COMMUN, V51, P16111, DOI 10.1039/c5cc06279a
   DIXON DA, 1994, J PHYS CHEM-US, V98, P13435, DOI 10.1021/j100102a001
   Dong XF, 2017, ANAL CHEM, V89, P3966, DOI 10.1021/acs.analchem.6b04394
   Dube DH, 2005, NAT REV DRUG DISCOV, V4, P477, DOI 10.1038/nrd1751
   Feng XY, 2018, TALANTA, V179, P377, DOI 10.1016/j.talanta.2017.11.040
   Ferrara C, 2011, P NATL ACAD SCI USA, V108, P12669, DOI 10.1073/pnas.1108455108
   Gaunitz S, 2017, ANAL CHEM, V89, P389, DOI 10.1021/acs.analchem.6b04343
   Guo Y, 2015, ANALYST, V140, P6452, DOI 10.1039/c5an00670h
   Guo ZM, 2007, CHEM COMMUN, P2491, DOI 10.1039/b701831b
   Halim A, 2011, P NATL ACAD SCI USA, V108, P11848, DOI 10.1073/pnas.1102664108
   Hart GW, 2010, CELL, V143, P672, DOI 10.1016/j.cell.2010.11.008
   Hoffmann M, 2018, PROTEOMICS, V18, DOI 10.1002/pmic.201800282
   Hollingsworth MA, 2004, NAT REV CANCER, V4, P45, DOI 10.1038/nrc1251
   Huang BY, 2014, ELECTROPHORESIS, V35, P2091, DOI 10.1002/elps.201400034
   Huang JF, 2014, J CHROMATOGR A, V1372, P1, DOI 10.1016/j.chroma.2014.10.107
   Ikegami T, 2019, J SEP SCI, V42, P130, DOI 10.1002/jssc.201801074
   Jayaraman N, 2013, CHEM SOC REV, V42, P4640, DOI 10.1039/c3cs00001j
   Ji SL, 2015, ANALYST, V140, P6250, DOI 10.1039/c5an01159k
   Jin GW, 2016, RSC ADV, V6, P8584, DOI 10.1039/c5ra24828k
   Li XL, 2016, ACS APPL MATER INTER, V8, P13294, DOI 10.1021/acsami.6b03104
   Li YL, 2018, ANAL CHIM ACTA, V1024, P84, DOI 10.1016/j.aca.2018.04.030
   Li YY, 2016, TALANTA, V160, P72, DOI 10.1016/j.talanta.2016.07.016
   Liang T, 2015, J CHROMATOGR A, V1388, P110, DOI 10.1016/j.chroma.2015.02.019
   LINDEN JC, 1975, J CHROMATOGR, V105, P125, DOI 10.1016/S0021-9673(01)81096-7
   Liu QJ, 2017, TALANTA, V175, P477, DOI 10.1016/j.talanta.2017.07.067
   Lorenz B, 2012, J AM CHEM SOC, V134, P3326, DOI 10.1021/ja210304j
   Magalhaes A, 2017, CANCER CELL, V31, P733, DOI 10.1016/j.ccell.2017.05.012
   McCalley DV, 2017, J CHROMATOGR A, V1523, P49, DOI 10.1016/j.chroma.2017.06.026
   McCalley DV, 2015, J CHROMATOGR A, V1411, P41, DOI 10.1016/j.chroma.2015.07.092
   Melnikov SM, 2012, ANGEW CHEM INT EDIT, V51, P6251, DOI 10.1002/anie.201201096
   Miller RL, 2017, ANAL CHEM, V89, P8942, DOI 10.1021/acs.analchem.7b01417
   Nunez C, 2019, CLIN CHIM ACTA, V490, P113, DOI 10.1016/j.cca.2018.12.028
   Ongay S, 2012, J SEP SCI, V35, P2341, DOI 10.1002/jssc.201200434
   Oyelaran O, 2009, CURR OPIN CHEM BIOL, V13, P406, DOI 10.1016/j.cbpa.2009.06.021
   Palaniappan KK, 2016, CHEM REV, V116, P14277, DOI 10.1021/acs.chemrev.6b00023
   Palmisano G, 2010, NAT PROTOC, V5, P1974, DOI 10.1038/nprot.2010.167
   Pan S, 2011, MOL CELL PROTEOMICS, V10, DOI 10.1074/mcp.R110.003251
   Pan YT, 2015, ANAL CHEM, V87, P656, DOI 10.1021/ac5034215
   Park S, 2013, CHEM SOC REV, V42, P4310, DOI 10.1039/c2cs35401b
   Petrescu S, 2012, GLYCOSYLATION, pIX
   Qiao LZ, 2016, TRAC-TREND ANAL CHEM, V81, P23, DOI 10.1016/j.trac.2016.03.021
   Qing GY, 2017, ADV MATER, V29, DOI 10.1002/adma.201604670
   Qing GY, 2016, ACS APPL MATER INTER, V8, P22084, DOI 10.1021/acsami.6b07863
   Secher A, 2016, NAT COMMUN, V7, DOI 10.1038/ncomms11436
   Shao WY, 2018, ANAL BIOANAL CHEM, V410, P1019, DOI 10.1007/s00216-017-0626-x
   Shao WY, 2016, TALANTA, V158, P361, DOI 10.1016/j.talanta.2016.05.034
   Shen AJ, 2011, CHEM COMMUN, V47, P4550, DOI 10.1039/c1cc10421g
   Shen BQ, 2017, TALANTA, V169, P195, DOI 10.1016/j.talanta.2017.03.049
   Sheng QY, 2016, J SEP SCI, V39, P3339, DOI 10.1002/jssc.201600430
   Song YY, 2018, ADV MATER, V30, DOI 10.1002/adma.201803299
   Steentoft C, 2015, NAT METHODS, V12, P160, DOI 10.1038/nmeth0215-160d
   Sun N., 2019, MICROCHIM ACTA, V186, DOI [10.1007/s00604-00019-03274-00603, DOI 10.1007/S00604-00019-03274-00603]
   Sun N, 2018, RSC ADV, V8, P38780, DOI 10.1039/c8ra07192f
   Sun X., 2016, RSC ADV, V6, P113058
   Tang F, 2017, TRAC-TREND ANAL CHEM, V86, P172, DOI 10.1016/j.trac.2016.10.007
   Taraji M, 2018, ANAL CHIM ACTA, V1000, P20, DOI 10.1016/j.aca.2017.09.041
   Tian YA, 2007, NAT PROTOC, V2, P334, DOI 10.1038/nprot.2007.42
   Totten SM, 2017, J PROTEOME RES, V16, P1249, DOI 10.1021/acs.jproteome.6b00849
   Wang JX, 2017, NANOSCALE, V9, P10750, DOI 10.1039/c7nr02932b
   Wang JX, 2015, J CHROMATOGR A, V1398, P29, DOI 10.1016/j.chroma.2015.03.065
   Wang QQ, 2018, ANAL CHIM ACTA, V999, P184, DOI 10.1016/j.aca.2017.11.032
   Wang YA, 2015, J MATER CHEM B, V3, P8711, DOI 10.1039/c5tb01684c
   Wang Y, 2015, J CHROMATOGR A, V1403, P32, DOI 10.1016/j.chroma.2015.05.032
   Wu RQ, 2016, TALANTA, V160, P461, DOI 10.1016/j.talanta.2016.07.045
   Wu RQ, 2016, PROTEOMICS, V16, P1311, DOI 10.1002/pmic.201500383
   Wu SJ, 2015, ANALYST, V140, P3921, DOI 10.1039/c5an00570a
   Wu YL, 2018, TALANTA, V190, P298, DOI 10.1016/j.talanta.2018.08.010
   Xia CS, 2018, ANAL CHEM, V90, P6651, DOI 10.1021/acs.analchem.8b00461
   Yang WM, 2017, ANAL CHEM, V89, P11193, DOI 10.1021/acs.analchem.7b03641
   Yoshida T, 1997, ANAL CHEM, V69, P3038, DOI 10.1021/ac9702204
   You X, 2018, PROTEOMICS, V18, DOI 10.1002/pmic.201800042
   Yu DP, 2016, TALANTA, V161, P860, DOI 10.1016/j.talanta.2016.09.003
   Yu M, 2016, POLYMERS-BASEL, V8, DOI 10.3390/polym8030074
   Zacharias LG, 2016, J PROTEOME RES, V15, P3624, DOI 10.1021/acs.jproteome.6b00429
   Zhang W, 2013, SCIENCE, V340, P1463, DOI 10.1126/science.1236787
   Zhang WJ, 2018, PROTEOMICS, V18, DOI 10.1002/pmic.201700399
   Zhang Y, 2015, CHEM SOC REV, V44, P8260, DOI 10.1039/c4cs00529e
   Zhang Y, 2019, TALANTA, V191, P509, DOI 10.1016/j.talanta.2018.09.016
   Zhao YM, 2017, J CHROMATOGR A, V1482, P23, DOI 10.1016/j.chroma.2016.12.054
   Zou XJ, 2017, ANAL CHEM, V89, P7520, DOI 10.1021/acs.analchem.7b01209
   Zou XJ, 2016, CHEM COMMUN, V52, P3251, DOI 10.1039/c5cc10416e
NR 93
TC 50
Z9 50
U1 63
U2 173
PU ELSEVIER SCI LTD
PI OXFORD
PA THE BOULEVARD, LANGFORD LANE, KIDLINGTON, OXFORD OX5 1GB, OXON, ENGLAND
SN 0165-9936
EI 1879-3142
J9 TRAC-TREND ANAL CHEM
JI Trac-Trends Anal. Chem.
PD MAR
PY 2020
VL 124
AR 115570
DI 10.1016/j.trac.2019.06.020
PG 13
WC Chemistry, Analytical
WE Science Citation Index Expanded (SCI-EXPANDED)
SC Chemistry
GA KS5SL
UT WOS:000518368000028
OA hybrid
DA 2022-04-10
ER

PT J
AU Goswami, AM
AF Goswami, Achintya Mohan
TI Computational analyses prioritize and reveal the deleterious nsSNPs in
   human angiotensinogen gene
SO COMPUTATIONAL BIOLOGY AND CHEMISTRY
LA English
DT Article
DE Angiotensinogen; Non-synonymous single nucleotide polymorphisms; In
   silico; Protein stability; Pathogenic mutations
ID ESSENTIAL-HYPERTENSION; PROTEIN MUTATIONS; VARIANTS; SYSTEM; PREDICTION;
   STABILITY; POLYMORPHISMS; SERVER; ANGIOGENESIS; SEQUENCE
AB Angiotensinogen (AGT) is a key component of renin-angiotensin-aldosterone system (RAAS), which plays central role in blood pressure homeostasis. Association of AGT polymorphisms have been investigated in different ethnic populations in variety of cardiovascular and non-cardiovascular conditions. In this study, 354 non-synonymous SNPs (nsSNPs) of AGT were evaluated to predict damaging and structurally important variants. Majority of the deleterious nsSNPs occurred in the evolutionary conserved regions. Several of these nsSNPs were found to affect post-translational modification like methylation, glycosylation, phosphorylation, ubiquitination etc. Structural evaluations predicted 19 variants as destabilizing and some of them were also predicted to destabilize the renin-AGT interaction. Therefore, the present computational investigation predicted pathogenic and functionally important variants of human AGT gene. The study has also shown that AGT deregulation is associated with survival outcome in patients with gastric and breast cancer, using microarray gene expression profile. Furthermore, the computationally screened nsSNPs can be analyzed in population based genotyping studies and may help futuristic drug development in the area of AGT pharmacogenomics.
C1 [Goswami, Achintya Mohan] Krishnagar Govt Coll, Dept Physiol, Nadia 741101, W Bengal, India.
RP Goswami, AM (corresponding author), Krishnagar Govt Coll, Dept Physiol, Nadia 741101, W Bengal, India.
EM achintya02@gmail.com
FU UGC-Minor Research Grant [PSW092/14-15 (ERO)]
FX I want to acknowledge UGC-Minor Research Grant [F. No. PSW092/14-15
   (ERO)] for funding.
CR Adzhubei IA, 2010, NAT METHODS, V7, P248, DOI 10.1038/nmeth0410-248
   Ager EI, 2008, CARCINOGENESIS, V29, P1675, DOI 10.1093/carcin/bgn171
   Ashkenazy H, 2010, NUCLEIC ACIDS RES, V38, pW529, DOI 10.1093/nar/gkq399
   Balam-Ortiz E, 2011, AM J MED SCI, V342, P205, DOI 10.1097/MAJ.0b013e3182121020
   Bao H, 2015, INT J CLIN EXP MED, V8, P12914
   Bouquet C, 2006, MOL THER, V14, P175, DOI 10.1016/j.ymthe.2006.01.017
   Brown DK, 2017, GLOB HEART, V12, P121, DOI 10.1016/j.gheart.2017.01.006
   Bruque CD, 2016, SCI REP-UK, V6, DOI 10.1038/srep39082
   Capriotti E, 2006, BIOINFORMATICS, V22, P2729, DOI 10.1093/bioinformatics/btl423
   Capriotti E, 2017, NUCLEIC ACIDS RES, V45, pW247, DOI 10.1093/nar/gkx369
   Capriotti E, 2013, BMC GENOMICS, V14, DOI 10.1186/1471-2164-14-S3-S6
   CAULFIELD M, 1994, NEW ENGL J MED, V330, P1629, DOI 10.1056/NEJM199406093302301
   Celerier J, 2002, HYPERTENSION, V39, P224, DOI 10.1161/hy0202.103441
   Chen G, 2011, J AM SOC NEPHROL, V22, P1876, DOI 10.1681/ASN.2010080881
   Choi YJ, 2012, PLOS ONE, V7, DOI 10.1371/journal.pone.0043418
   Corvol P, 2003, CURR HYPERTENS REP, V5, P149, DOI 10.1007/s11906-003-0072-3
   CUMIN F, 1987, BIOCHIM BIOPHYS ACTA, V913, P10, DOI 10.1016/0167-4838(87)90226-3
   Dakal TC, 2017, SCI REP-UK, V7, DOI 10.1038/s41598-017-06575-4
   Dehouck Y, 2011, BMC BIOINFORMATICS, V12, DOI 10.1186/1471-2105-12-151
   Dickson ME, 2006, HYPERTENSION, V48, P14, DOI 10.1161/01.HYP.0000227932.13687.60
   ESWAR N, 2006, CURR PROTOC BIOINFOR, pCH5, DOI DOI 10.1002/0471250953.BI0506S47
   Folkman L, 2016, J MOL BIOL, V428, P1394, DOI 10.1016/j.jmb.2016.01.012
   George AJ, 2010, NAT REV CANCER, V10, P745, DOI 10.1038/nrc2945
   Getov I, 2016, INT J MOL SCI, V17, DOI 10.3390/ijms17040512
   Giollo M, 2014, BMC GENOMICS, V15, DOI 10.1186/1471-2164-15-S4-S7
   Goswami AM, 2018, META GENE, V17, P153, DOI 10.1016/j.mgene.2018.06.002
   Goswami AM, 2017, COMPUT BIOL CHEM, V66, P1, DOI 10.1016/j.compbiolchem.2016.10.010
   Goswami AM, 2015, META GENE, V5, P162, DOI 10.1016/j.mgene.2015.07.007
   INOUE I, 1995, J BIOL CHEM, V270, P11430, DOI 10.1074/jbc.270.19.11430
   Inoue I, 1997, J CLIN INVEST, V99, P1786, DOI 10.1172/JCI119343
   JEUNEMAITRE X, 1992, CELL, V71, P169, DOI 10.1016/0092-8674(92)90275-H
   Jiang WL, 2014, SCI REP-UK, V4, DOI 10.1038/srep04207
   Joyce JA, 2015, SCIENCE, V348, P74, DOI 10.1126/science.aaa6204
   Kelly JF, 2014, PLOS ONE, V9, DOI 10.1371/journal.pone.0100121
   Ko J, 2012, NUCLEIC ACIDS RES, V40, pW294, DOI 10.1093/nar/gks493
   Kolovou GD, 2014, ANGIOLOGY, V65, P269, DOI 10.1177/0003319713491135
   Kumar A, 2014, BIOCHEM BIOPH RES CO, V446, P504, DOI 10.1016/j.bbrc.2014.02.139
   Kumar P, 2009, NAT PROTOC, V4, P1073, DOI 10.1038/nprot.2009.86
   Lopez-Ferrando V, 2017, NUCLEIC ACIDS RES, V45, pW222, DOI 10.1093/nar/gkx313
   Lu H, 2016, HYPERTENS RES, V39, P492, DOI 10.1038/hr.2016.17
   Lu H, 2016, ARTERIOSCL THROM VAS, V36, P256, DOI 10.1161/ATVBAHA.115.306740
   Martin AJM, 2011, BIOINFORMATICS, V27, P2003, DOI 10.1093/bioinformatics/btr191
   Niroula A, 2015, PLOS ONE, V10, DOI 10.1371/journal.pone.0117380
   Nobuhiko A, 2004, ARTERIOSCL THROM VAS, V24, P2143, DOI 10.1161/01.ATV.0000145607.03879.e0
   Parthiban V, 2006, NUCLEIC ACIDS RES, V34, pW239, DOI 10.1093/nar/gkl190
   Pejaver V., 2017, MUTPRED2 INFERRING M, DOI DOI 10.1101/134981
   Pettersen EF, 2004, J COMPUT CHEM, V25, P1605, DOI 10.1002/jcc.20084
   Petukh M, 2016, INT J MOL SCI, V17, DOI 10.3390/ijms17040547
   Pinter M, 2017, SCI TRANSL MED, V9, DOI 10.1126/scitranslmed.aan5616
   Pires DEV, 2014, BIOINFORMATICS, V30, P335, DOI 10.1093/bioinformatics/btt691
   Pringle KG, 2016, ENDOCR CONNECT, V5, P128, DOI 10.1530/EC-15-0112
   Reiter LM, 2016, J HUM HYPERTENS, V30, P467, DOI 10.1038/jhh.2015.114
   Reva B, 2011, NUCLEIC ACIDS RES, V39, pE118, DOI 10.1093/nar/gkr407
   Shihab HA, 2013, HUM MUTAT, V34, P57, DOI 10.1002/humu.22225
   Szasz AM, 2016, ONCOTARGET, V7, P49322, DOI 10.18632/oncotarget.10337
   Thomas PD, 2003, GENOME RES, V13, P2129, DOI 10.1101/gr.772403
   Valdebenito-Maturana B, 2017, J COMPUT CHEM, V38, P467, DOI 10.1002/jcc.24712
   Worth CL, 2011, NUCLEIC ACIDS RES, V39, pW215, DOI 10.1093/nar/gkr363
   Wu CH, 2018, ARTERIOSCL THROM VAS, V38, pE108, DOI 10.1161/ATVBAHA.118.311282
   Wu Congqing, 2011, N Am J Med Sci (Boston), V4, P183
   Yan YH, 2019, J BIOL CHEM, V294, P2353, DOI 10.1074/jbc.RA118.006608
   Yue P, 2005, J MOL BIOL, V353, P459, DOI 10.1016/j.jmb.2005.08.020
   Zhang Y, 2005, NUCLEIC ACIDS RES, V33, P2302, DOI 10.1093/nar/gki524
   Zhou AW, 2010, NATURE, V468, P108, DOI 10.1038/nature09505
   Zhou HY, 2016, PLOS ONE, V11, DOI 10.1371/journal.pone.0150965
NR 65
TC 1
Z9 1
U1 0
U2 3
PU ELSEVIER SCI LTD
PI OXFORD
PA THE BOULEVARD, LANGFORD LANE, KIDLINGTON, OXFORD OX5 1GB, OXON, ENGLAND
SN 1476-9271
EI 1476-928X
J9 COMPUT BIOL CHEM
JI Comput. Biol. Chem.
PD FEB
PY 2020
VL 84
AR 107199
DI 10.1016/j.compbiolchem.2019.107199
PG 12
WC Biology; Computer Science, Interdisciplinary Applications
WE Science Citation Index Expanded (SCI-EXPANDED)
SC Life Sciences & Biomedicine - Other Topics; Computer Science
GA KH9CT
UT WOS:000510947400015
PM 31931433
DA 2022-04-10
ER

PT J
AU Jane, P
   Gogl, G
   Kostmann, C
   Bich, G
   Girault, V
   Caillet-Saguy, C
   Eberling, P
   Vincentelli, R
   Wolff, N
   Trave, G
   Nomine, Y
AF Jane, Pau
   Gogl, Gergo
   Kostmann, Camille
   Bich, Goran
   Girault, Virginie
   Caillet-Saguy, Celia
   Eberling, Pascal
   Vincentelli, Renaud
   Wolff, Nicolas
   Trave, Gilles
   Nomine, Yves
TI Interactomic affinity profiling by holdup assay: Acetylation and distal
   residues impact the PDZome-binding specificity of PTEN phosphatase
SO PLOS ONE
LA English
DT Article
ID TUMOR-SUPPRESSOR; PROTEIN INTERACTIONS; LYSINE ACETYLATION; DOMAIN;
   PHOSPHORYLATION; inhibitor; STABILITY; peptide
AB Protein domains often recognize short linear protein motifs composed of a core conserved consensus sequence surrounded by less critical, modulatory positions. PTEN, a lipid phosphatase involved in phosphatidylinositol 3-kinase (PI3K) pathway, contains such a short motif located at the extreme C-terminus capable to recognize PDZ domains. It has been shown that the acetylation of this motif could modulate the interaction with several PDZ domains. Here we used an accurate experimental approach combining high-throughput holdup chromatographic assay and competitive fluorescence polarization technique to measure quantitative binding affinity profiles of the PDZ domain-binding motif (PBM) of PTEN. We substantially extended the previous knowledge towards the 266 known human PDZ domains, generating the full PDZome-binding profile of the PTEN PBM. We confirmed that inclusion of N-terminal flanking residues, acetylation or mutation of a lysine at a modulatory position significantly altered the PDZome-binding profile. A numerical specificity index is also introduced as an attempt to quantify the specificity of a given PBM over the complete PDZome. Our results highlight the impact of modulatory residues and post-translational modification on PBM interactomes and their specificity.
C1 [Jane, Pau; Gogl, Gergo; Kostmann, Camille; Bich, Goran; Eberling, Pascal; Trave, Gilles; Nomine, Yves] INSERM U1258 CNRS UMR 7104 Univ Strasbourg, Equipe Labelisee Ligue, 2015 Dept Integrat Struct Biol, Inst Genet Biol Mol Cellulaire IGBMC, Illkirch Graffenstaden, France.
   [Girault, Virginie; Caillet-Saguy, Celia; Wolff, Nicolas] Inst Pasteur, UMR 3571 CNRS, Unite Recepteurs Canaux, Paris, France.
   [Vincentelli, Renaud] CNRS Aix Marseille Univ, Architecture & Fonct Macromol Biol AFMB, Marseille, France.
   [Girault, Virginie] Tech Univ Munich, Inst Virol, Sch Med, Munich, Germany.
RP Trave, G; Nomine, Y (corresponding author), INSERM U1258 CNRS UMR 7104 Univ Strasbourg, Equipe Labelisee Ligue, 2015 Dept Integrat Struct Biol, Inst Genet Biol Mol Cellulaire IGBMC, Illkirch Graffenstaden, France.
EM traveg@igbmc.fr; nominey@igbmc.fr
RI Jané, Pau/AAF-3709-2021; Caillet-Saguy, Célia/AAC-1249-2022
OI Jané, Pau/0000-0001-8925-7563; Nomine, Yves/0000-0002-2912-116X; Gogl,
   Gergo/0000-0002-8597-3711; Girault, Virginie/0000-0002-3240-4400
FU European Unions Horizon 2020 research and innovation program [675341];
   Ligue contre le cancer (equipe labellisee 2015)Ligue nationale contre le
   cancer; National Institutes of HealthUnited States Department of Health
   & Human ServicesNational Institutes of Health (NIH) - USA [R01CA134737];
   Canceropole Grand-Est (projet Emergent); French Infrastructure for
   Integrated Structural Biology (FRISBI); "Post-doctorants en France"
   program of the ARC foundation
FX Acknowledgements Institutional support from: Centre National de la
   Recherche Scientifique (CNRS), Universite de Strasbourg, Institut
   National de la Sante et de la Recherche Medicale (INSERM), Region
   Alsace. "Post-doctorants en France" program of the ARC foundation
   (G.G.). European Unions Horizon 2020 research and innovation program
   under the Marie Sklodowska-Curie (grant agreement No 675341) (G.T.).
   Ligue contre le cancer (equipe labellisee 2015) (G.T.). National
   Institutes of Health (Grant R01CA134737) (G.T.). Canceropole Grand-Est
   (projet Emergent). French Infrastructure for Integrated Structural
   Biology (FRISBI). The funding sources are not involved in data
   collection, analysis and interpretation; they did not participate to the
   manuscript writing nor in the decision to submit the article.
CR Adey NB, 2000, CANCER RES, V60, P35
   Amacher JF, 2014, STRUCTURE, V22, P82, DOI 10.1016/j.str.2013.09.019
   Anthis NJ, 2013, PROTEIN SCI, V22, P851, DOI 10.1002/pro.2253
   Appleton BA, 2006, J BIOL CHEM, V281, P22312, DOI 10.1074/jbc.M602901200
   Bonhoure A, 2020, ANAL BIOCHEM, V603, DOI 10.1016/j.ab.2020.113772
   Charbonnier S, 2008, PROTEIN EXPRES PURIF, V60, P64, DOI 10.1016/j.pep.2008.03.022
   Charbonnier S, 2006, PROTEIN EXPRES PURIF, V50, P89, DOI 10.1016/j.pep.2006.06.010
   Chow LML, 2006, CANCER LETT, V241, P184, DOI 10.1016/j.canlet.2005.11.042
   Clairfeuille T, 2016, NAT STRUCT MOL BIOL, V23, P921, DOI 10.1038/nsmb.3290
   Dormeyer W, 2005, MOL CELL PROTEOMICS, V4, P1226, DOI 10.1074/mcp.M500047-MCP200
   Duhoo Y, 2019, METHODS MOL BIOL, V2025, P439, DOI 10.1007/978-1-4939-9624-7_21
   Fournane S, 2011, J MOL RECOGNIT, V24, P511, DOI 10.1002/jmr.1056
   Gogl G., 2020, STRUCTURE, P1
   Gogl G, 2019, J MOL BIOL, V431, P1234, DOI 10.1016/j.jmb.2019.01.038
   HECHT A, 1995, CELL, V80, P583, DOI 10.1016/0092-8674(95)90512-X
   Huang R, 2010, J AM CHEM SOC, V132, P9986, DOI 10.1021/ja103954u
   Ikenoue T, 2008, CANCER RES, V68, P6908, DOI 10.1158/0008-5472.CAN-08-1107
   Jadwin JA, 2012, FEBS LETT, V586, P2586, DOI 10.1016/j.febslet.2012.04.019
   Jane P., 2020, METHODS MOL BIOL
   Jurado S, 2010, EMBO J, V29, P2827, DOI 10.1038/emboj.2010.160
   Karnoup AS, 2005, GLYCOBIOLOGY, V15, P965, DOI 10.1093/glycob/cwi077
   Khan Z, 2019, J BIOL CHEM, V294, P13755, DOI 10.1074/jbc.RA119.008238
   Kim SC, 2006, MOL CELL, V23, P607, DOI 10.1016/j.molcel.2006.06.026
   Kotelevets L, 2004, FASEB J, V18, P115, DOI 10.1096/fj.04-1942fje
   Kouzarides T, 2000, EMBO J, V19, P1176, DOI 10.1093/emboj/19.6.1176
   Kozlov G, 2000, BIOCHEMISTRY-US, V39, P2572, DOI 10.1021/bi991913c
   Luck K, 2012, FEBS LETT, V586, P2648, DOI 10.1016/j.febslet.2012.03.056
   Luck K, 2011, PLOS ONE, V6, DOI 10.1371/journal.pone.0025376
   Lvarssonl Y, 2019, CURR OPIN STRUC BIOL, V54, P26, DOI 10.1016/j.sbi.2018.09.009
   Mamonova T, 2015, PLOS ONE, V10, DOI 10.1371/journal.pone.0129554
   Myers MP, 1997, AM J HUM GENET, V61, P1234, DOI 10.1086/301659
   Nourry Claire, 2003, Sci STKE, V2003, pRE7
   Okumura K, 2006, J BIOL CHEM, V281, P26562, DOI 10.1074/jbc.M605391200
   Pascoe HG, 2015, P NATL ACAD SCI USA, V112, P14852, DOI 10.1073/pnas.1508931112
   Roehrl MHA, 2004, BIOCHEMISTRY-US, V43, P16056, DOI 10.1021/bi048233g
   Sheng M, 2001, ANNU REV NEUROSCI, V24, P1, DOI 10.1146/annurev.neuro.24.1.1
   Shinde SR, 2017, CELL REP, V21, P1655, DOI 10.1016/j.celrep.2017.10.053
   Smialowski P, 2010, NUCLEIC ACIDS RES, V38, pD540, DOI 10.1093/nar/gkp1026
   Sotelo NS, 2015, METHODS, V77-78, P147, DOI 10.1016/j.ymeth.2014.10.017
   Stambolic V, 1998, CELL, V95, P29, DOI 10.1016/S0092-8674(00)81780-8
   Sundell GN, 2018, MOL SYST BIOL, V14, DOI 10.15252/msb.20178129
   Takahashi Y, 2006, EMBO J, V25, P910, DOI 10.1038/sj.emboj.7600979
   Terrien E, 2012, SCI SIGNAL, V5, DOI 10.1126/scisignal.2002941
   Tonikian R, 2008, PLOS BIOL, V6, P2043, DOI 10.1371/journal.pbio.0060239
   Trainesel D, 2007, J MAGN RESON, V188, P56, DOI 10.1016/j.jmr.2007.05.023
   Valiente M, 2005, J BIOL CHEM, V280, P28936, DOI 10.1074/jbc.M504761200
   van Agthoven MA, 2012, ANAL CHEM, V84, P5589, DOI 10.1021/ac3004874
   Veiga VS, 2019, PROCEEDINGS OF CANOPIE-HPC 2019:2019 IEEE/ACM 1ST INTERNATIONAL WORKSHOP ON CONTAINERS AND NEW ORCHESTRATION PARADIGMS FOR ISOLATED ENVIRONMENTS IN HPC (CANOPIE-HPC), P1, DOI 10.1109/CANOPIE-HPC49598.2019.00006
   Verrastro I, 2016, FREE RADICAL BIO MED, V90, P24, DOI 10.1016/j.freeradbiomed.2015.11.004
   Vincentelli R, 2015, NAT METHODS, V12, P787, DOI [10.1038/nmeth.3438, 10.1038/NMETH.3438]
   Vouilleme L, 2010, ANGEW CHEM INT EDIT, V49, P9912, DOI 10.1002/anie.201005575
   Wang XD, 2008, MOL CELL BIOL, V28, P227, DOI 10.1128/MCB.01245-07
   Wiedemann U, 2004, J MOL BIOL, V343, P703, DOI 10.1016/j.jmb.2004.08.064
   Wu H, 2007, MOL CELL, V28, P886, DOI 10.1016/j.molcel.2007.10.028
   Wu XY, 2000, P NATL ACAD SCI USA, V97, P4233, DOI 10.1073/pnas.97.8.4233
   Wu Y, 2000, J BIOL CHEM, V275, P21477, DOI 10.1074/jbc.M909741199
   Yan MF, 2018, CANCER LETT, V430, P67, DOI 10.1016/j.canlet.2018.05.012
   Yang LY, 2011, ENDOCRINOLOGY, V152, P4537, DOI 10.1210/en.2011-1207
   Ye F, 2013, BIOCHEM J, V455, P1, DOI 10.1042/BJ20130783
   Zeng L, 2002, FEBS LETT, V513, P124, DOI 10.1016/S0014-5793(01)03309-9
   Zhang YN, 2006, J BIOL CHEM, V281, P22299, DOI 10.1074/jbc.M602902200
NR 61
TC 3
Z9 3
U1 0
U2 2
PU PUBLIC LIBRARY SCIENCE
PI SAN FRANCISCO
PA 1160 BATTERY STREET, STE 100, SAN FRANCISCO, CA 94111 USA
SN 1932-6203
J9 PLOS ONE
JI PLoS One
PD DEC 31
PY 2020
VL 15
IS 12
AR e0244613
DI 10.1371/journal.pone.0244613
PG 24
WC Multidisciplinary Sciences
WE Science Citation Index Expanded (SCI-EXPANDED)
SC Science & Technology - Other Topics
GA PP1TW
UT WOS:000605651900050
PM 33382810
OA Green Published, Green Submitted, gold
DA 2022-04-10
ER

PT J
AU Evans, CM
   Phillips, M
   Malone, KL
   Tonelli, M
   Cornilescu, G
   Cornilescu, C
   Holton, SJ
   Gorjanacz, M
   Wang, LP
   Carlson, S
   Gay, JC
   Nix, JC
   Demeler, B
   Markley, JL
   Glass, KC
AF Evans, Chiara M.
   Phillips, Margaret
   Malone, Kiera L.
   Tonelli, Marco
   Cornilescu, Gabriel
   Cornilescu, Claudia
   Holton, Simon J.
   Gorjanacz, Matyas
   Wang, Liping
   Carlson, Samuel
   Gay, Jamie C.
   Nix, Jay C.
   Demeler, Borries
   Markley, John L.
   Glass, Karen C.
TI Coordination of Di-Acetylated Histone Ligands by the ATAD2 Bromodomain
SO INTERNATIONAL JOURNAL OF MOLECULAR SCIENCES
LA English
DT Article
DE ATAD2 bromodomain; acetylated histones; post-translational
   modifications; X-ray crystallography; nuclear magnetic resonance;
   isothermal titration calorimetry; analytical ultracentrifugation;
   chromatin reader domain; cancer; epigenetic
ID SEDIMENTATION-VELOCITY EXPERIMENTS; NMR-SPECTROSCOPY; CHEMICAL PROBE;
   ATPASE-FAMILY; RECOGNITION; BINDING; PROTEINS; OVEREXPRESSION;
   ACETYLATION; COACTIVATOR
AB The ATPase Family, AAA domain-containing protein 2 (ATAD2) bromodomain (BRD) has a canonical bromodomain structure consisting of four alpha-helices. ATAD2 functions as a co-activator of the androgen and estrogen receptors as well as the MYC and E2F transcription factor. ATAD2 also functions during DNA replication, recognizing newly synthesized histones. In addition, ATAD2 is shown to be up-regulated in multiple forms of cancer including breast, lung, gastric, endometrial, renal, and prostate. Furthermore, up-regulation of ATAD2 is strongly correlated with poor prognosis in many types of cancer, making the ATAD2 bromodomain an innovative target for cancer therapeutics. In this study, we describe the recognition of histone acetyllysine modifications by the ATAD2 bromodomain. Residue-specific information on the complex formed between the histone tail and the ATAD2 bromodomain, obtained through nuclear magnetic resonance spectroscopy (NMR) and X-ray crystallography, illustrates key residues lining the binding pocket, which are involved in coordination of di-acetylated histone tails. Analytical ultracentrifugation, NMR relaxation data, and isothermal titration calorimetry further confirm the monomeric state of the functionally active ATAD2 bromodomain in complex with di-acetylated histone ligands. Overall, we describe histone tail recognition by ATAD2 BRD and illustrate that one acetyllysine group is primarily engaged by the conserved asparagine (N1064), the "RVF" shelf residues, and the flexible ZA loop. Coordination of a second acetyllysine group also occurs within the same binding pocket but is essentially governed by unique hydrophobic and electrostatic interactions making the di-acetyllysine histone coordination more specific than previously presumed.
C1 [Evans, Chiara M.; Phillips, Margaret; Malone, Kiera L.; Carlson, Samuel; Gay, Jamie C.; Glass, Karen C.] Albany Coll Pharm & Hlth Sci, Dept Pharmaceut Sci, Colchester, VT 05446 USA.
   [Phillips, Margaret; Malone, Kiera L.; Glass, Karen C.] Univ Vermont, Larner Coll Med, Dept Pharmacol, Burlington, VT 05405 USA.
   [Tonelli, Marco; Cornilescu, Gabriel; Cornilescu, Claudia; Markley, John L.] Univ Wisconsin, Natl Magnet Resonance Facil Madison, Madison, WI 53706 USA.
   [Holton, Simon J.; Gorjanacz, Matyas] Bayer AG, Pharmaceut Res & Early Dev Oncol, D-13353 Berlin, Germany.
   [Wang, Liping; Demeler, Borries] Univ Texas Hlth San Antonio, Dept Biochem & Struct Biol, San Antonio, TX 78229 USA.
   [Nix, Jay C.] Adv Light Source, Mol Biol Consortium, Berkeley, CA 94720 USA.
   [Demeler, Borries] Univ Lethbridge, Dept Chem & Biochem, Lethbridge, AB T1K 3M4, Canada.
   [Holton, Simon J.] NUVISAN ICB GmbH, D-13353 Berlin, Germany.
RP Glass, KC (corresponding author), Albany Coll Pharm & Hlth Sci, Dept Pharmaceut Sci, Colchester, VT 05446 USA.; Glass, KC (corresponding author), Univ Vermont, Larner Coll Med, Dept Pharmacol, Burlington, VT 05405 USA.
EM chiara.evans@acphs.edu; margaret.phillips@med.uvm.edu;
   kiera.malone@med.uvm.edu; tonelli@nmrfam.wisc.edu;
   gabriel.cornilescu@nih.gov; ccc1968@stanford.edu;
   simon.holton@nuvisan.com; matyas.gorjanacz@bayer.com;
   wangl1@uthscsa.edu; samuel.carlson@acphs.edu; jamie.gay@acphs.edu;
   jcnix@lbl.gov; demeler@uleth.ca; markley@nmrfam.wisc.edu;
   Karen.Glass@med.uvm.edu
RI Glass, Karen C./AAV-1076-2021; Phillips, Margaret/AAZ-2298-2021;
   Cornilescu, Gabriel/H-3113-2011
OI Glass, Karen C./0000-0002-2761-733X; Phillips,
   Margaret/0000-0003-1654-8583; Cornilescu, Gabriel/0000-0002-1204-8904;
   Markley, John/0000-0003-1799-6134; Demeler, Borries/0000-0002-2414-9518
FU National Institute of General Medical Sciences of the National
   Institutes of HealthUnited States Department of Health & Human
   ServicesNational Institutes of Health (NIH) - USANIH National Institute
   of General Medical Sciences (NIGMS) [NIGMS R01GM129338, NIGMS
   R15GM104865, NCI P01CA240685]; National Cancer Institute of the National
   Institutes of HealthUnited States Department of Health & Human
   ServicesNational Institutes of Health (NIH) - USANIH National Cancer
   Institute (NCI) [NIGMS R01GM129338, NIGMS R15GM104865, NCI P01CA240685];
   University of Vermont Cancer Center; ACPHS; NIHUnited States Department
   of Health & Human ServicesNational Institutes of Health (NIH) - USA
   [1R01GM120600, P41GM136463, P41RR002301, P41GM103399, S10RR02781,
   S10RR08438, S10RR023438, S10RR025062, S10RR029220]; NSF/XSEDENational
   Science Foundation (NSF) [TG-MCB070039N]; University of
   Wisconsin-Madison; NSFNational Science Foundation (NSF) [DMB-8415048,
   OIA-9977486, BIR-9214394]; USDAUnited States Department of Agriculture
   (USDA)
FX Research reported in this publication was supported by the National
   Institute of General Medical Sciences and the National Cancer Institute
   of the National Institutes of Health under award numbers NIGMS
   R01GM129338, NIGMS R15GM104865, and NCI P01CA240685 to KCG. The content
   is solely the responsibility of the authors and does not necessarily
   represent the official views of the National Institutes of Health. This
   research was also supported by the University of Vermont Cancer Center.
   CME was the recipient of an ACPHS Student Summer Research Award in 2016,
   and an ACPHS graduate research assistantship from 2017-2018. Analytical
   ultracentrifugation experiments were performed at the Center for
   Analytical Ultracentrifugation of Macromolecular Assemblies (CAUMA) at
   UT Health San Antonio, which is supported by NIH grant 1R01GM120600
   (BD). UltraScan supercomputer calculations were supported through an
   NSF/XSEDE allocation grant TG-MCB070039N (BD). This study made use of
   the National Magnetic Resonance Facility at Madison, which is supported
   by NIH grant P41GM136463, old number P41GM103399 (NIGMS) and
   P41RR002301. Equipment was purchased with funds from the University of
   Wisconsin-Madison, the NIH P41GM103399, S10RR02781, S10RR08438,
   S10RR023438, S10RR025062, S10RR029220), the NSF (DMB-8415048,
   OIA-9977486, BIR-9214394), and the USDA.
CR Adams PD, 2010, ACTA CRYSTALLOGR D, V66, P213, DOI 10.1107/S0907444909052925
   Bamborough P, 2016, ANGEW CHEM INT EDIT, V55, P11382, DOI 10.1002/anie.201603928
   Becker W, 2018, CHEMPHYSCHEM, V19, P895, DOI 10.1002/cphc.201701253
   Boulton S, 2016, CHEM REV, V116, P6267, DOI 10.1021/acs.chemrev.5b00718
   Brookes E, 2008, COLLOID POLYM SCI, V286, P139, DOI 10.1007/s00396-007-1714-9
   Brookes E, 2010, EUR BIOPHYS J BIOPHY, V39, P405, DOI 10.1007/s00249-009-0413-5
   Cao WM, 2008, BIOPHYS J, V95, P54, DOI 10.1529/biophysj.107.123950
   Caron C, 2010, ONCOGENE, V29, P5171, DOI 10.1038/onc.2010.259
   Cavanagh J, 2018, PROTEIN NMR SPECTROS, V1st
   Chen D, 2017, UROLOGY, V102, DOI 10.1016/j.urology.2016.12.050
   Ciro M, 2009, CANCER RES, V69, P8491, DOI 10.1158/0008-5472.CAN-09-2131
   Corujo D, 2018, CANCERS, V10, DOI 10.3390/cancers10030059
   Davis IW, 2007, NUCLEIC ACIDS RES, V35, pW375, DOI 10.1093/nar/gkm216
   DELAGLIO F, 1995, J BIOMOL NMR, V6, P277, DOI 10.1007/BF00197809
   DeLano W. L., 2002, PYMOL MOL GRAPHICS S, V40, P82
   Demeler B., 2016, ANAL ULTRACENTRIFUGA, P119, DOI 10.1007/978-4-431-55985-6_8
   Demeler B, 2008, COLLOID POLYM SCI, V286, P129, DOI 10.1007/s00396-007-1699-4
   Demeler Borries, 2010, Curr Protoc Protein Sci, VChapter 7, DOI 10.1002/0471140864.ps0713s60
   Demont EH, 2015, J MED CHEM, V58, P5649, DOI 10.1021/acs.jmedchem.5b00772
   Dhalluin C, 1999, NATURE, V399, P491, DOI 10.1038/20974
   Emsley P, 2004, ACTA CRYSTALLOGR D, V60, P2126, DOI 10.1107/S0907444904019158
   Fernandez-Montalvan AE, 2017, ACS CHEM BIOL, V12, P2730, DOI 10.1021/acschembio.7b00708
   Filippakopoulos P, 2012, CELL, V149, P214, DOI 10.1016/j.cell.2012.02.013
   Flynn EM, 2015, STRUCTURE, V23, P1801, DOI 10.1016/j.str.2015.08.004
   Fouret R, 2012, CLIN CANCER RES, V18, P5606, DOI 10.1158/1078-0432.CCR-12-0505
   Furukawa A, 2016, PROG NUCL MAG RES SP, V96, P47, DOI 10.1016/j.pnmrs.2016.02.002
   Gorbet G, 2014, BIOPHYS J, V106, P1741, DOI 10.1016/j.bpj.2014.02.022
   Hong S, 2016, NEOPLASMA, V63, P846, DOI 10.4149/neo_2016_603
   Ikura M, 2015, MOL CELL BIOL, V35, P4147, DOI 10.1128/MCB.00757-15
   Kabsch W, 2010, ACTA CRYSTALLOGR D, V66, P125, DOI 10.1107/S0907444909047337
   KAY LE, 1989, BIOCHEMISTRY-US, V28, P8972, DOI 10.1021/bi00449a003
   Kobayashi J, 2004, DNA REPAIR, V3, P855, DOI 10.1016/j.dnarep.2004.03.023
   Koo SJ, 2016, ONCOTARGET, V7, P70323, DOI 10.18632/oncotarget.11855
   Krakstad C, 2015, ONCOTARGET, V6, P28440, DOI 10.18632/oncotarget.4955
   Langini C, 2017, J BIOL CHEM, V292, P19121, DOI 10.1074/jbc.AAC117.000630
   Leachman NT, 2010, DEV GROWTH DIFFER, V52, P747, DOI 10.1111/j.1440-169X.2010.01211.x
   Lee D, 2006, J MAGN RESON, V178, P72, DOI 10.1016/j.jmr.2005.08.014
   Lee W, 2015, BIOINFORMATICS, V31, P1325, DOI 10.1093/bioinformatics/btu830
   Lee W, 2009, BIOINFORMATICS, V25, P2085, DOI 10.1093/bioinformatics/btp345
   Lisi GP, 2016, CHEM REV, V116, P6323, DOI 10.1021/acs.chemrev.5b00541
   Lloyd JT, 2020, J MED CHEM, V63, P12799, DOI 10.1021/acs.jmedchem.0c01178
   Louis-Jeune C, 2012, PROTEINS, V80, P374, DOI 10.1002/prot.23188
   Lubula MY, 2014, FEBS LETT, V588, P3844, DOI 10.1016/j.febslet.2014.09.028
   MALONE EA, 1976, J REHABIL, V42, P14
   Mccoy AJ, 2007, J APPL CRYSTALLOGR, V40, P658, DOI 10.1107/S0021889807021206
   MEIBOOM S, 1958, REV SCI INSTRUM, V29, P688, DOI 10.1063/1.1716296
   Meier JC, 2017, ACS CHEM BIOL, V12, P2619, DOI 10.1021/acschembio.7b00481
   Miller DC, 2018, ORG BIOMOL CHEM, V16, P1843, DOI 10.1039/c8ob00099a
   Moriniere J, 2009, NATURE, V461, P664, DOI 10.1038/nature08397
   Morozumi Y, 2016, J MOL CELL BIOL, V8, P349, DOI 10.1093/jmcb/mjv060
   Murakami H, 2013, ANTICANCER RES, V33, P4299
   Nussinov R, 2016, CHEM REV, V116, P6263, DOI 10.1021/acs.chemrev.6b00283
   Obi JO, 2020, CURR RES STRUCT BIOL, V2, P104, DOI 10.1016/j.crstbi.2020.05.001
   Ogura T, 2001, GENES CELLS, V6, P575, DOI 10.1046/j.1365-2443.2001.00447.x
   Pellecchia M, 2002, NAT REV DRUG DISCOV, V1, P211, DOI 10.1038/nrd748
   Poncet-Montange G, 2015, BIOCHEM J, V466, P337, DOI 10.1042/BJ20140933
   Poplawski A, 2014, J MOL BIOL, V426, P1661, DOI 10.1016/j.jmb.2013.12.007
   Romero FA, 2016, J MED CHEM, V59, P1271, DOI 10.1021/acs.jmedchem.5b01514
   Schuck P, 1999, BIOPHYS J, V76, P2288, DOI 10.1016/S0006-3495(99)77384-4
   Shang P, 2015, TUMOR BIOL, V36, P4479, DOI 10.1007/s13277-015-3089-8
   Sun W, 2018, CELL DEATH DIS, V9, DOI 10.1038/s41419-018-0418-z
   Tallant C, 2015, STRUCTURE, V23, P80, DOI 10.1016/j.str.2014.10.017
   Umehara T, 2010, J BIOL CHEM, V285, P7610, DOI 10.1074/jbc.M109.062422
   Urbanucci A, 2017, CELL REP, V19, P2045, DOI 10.1016/j.celrep.2017.05.049
   Vidler LR, 2012, J MED CHEM, V55, P7346, DOI 10.1021/jm300346w
   Vukovic S, 2016, J PHYS-CONDENS MAT, V28, DOI 10.1088/0953-8984/28/34/344007
   WALLACE AC, 1995, PROTEIN ENG, V8, P127, DOI 10.1093/protein/8.2.127
   Williamson MP, 2013, PROG NUCL MAG RES SP, V73, P1, DOI 10.1016/j.pnmrs.2013.02.001
   Zeng L, 2002, FEBS LETT, V513, P124, DOI 10.1016/S0014-5793(01)03309-9
   Zou JX, 2007, P NATL ACAD SCI USA, V104, P18067, DOI 10.1073/pnas.0705814104
   Zou JX, 2009, CANCER RES, V69, P3339, DOI 10.1158/0008-5472.CAN-08-3440
NR 71
TC 1
Z9 1
U1 8
U2 12
PU MDPI
PI BASEL
PA ST ALBAN-ANLAGE 66, CH-4052 BASEL, SWITZERLAND
EI 1422-0067
J9 INT J MOL SCI
JI Int. J. Mol. Sci.
PD SEP
PY 2021
VL 22
IS 17
AR 9128
DI 10.3390/ijms22179128
PG 24
WC Biochemistry & Molecular Biology; Chemistry, Multidisciplinary
WE Science Citation Index Expanded (SCI-EXPANDED)
SC Biochemistry & Molecular Biology; Chemistry
GA UN9OU
UT WOS:000694337000001
PM 34502039
OA Green Submitted, gold, Green Published
DA 2022-04-10
ER

PT J
AU Joo, HY
   Yun, M
   Jeong, J
   Park, ER
   Shin, HJ
   Woo, SR
   Jung, JK
   Kim, YM
   Park, JJ
   Kim, J
   Lee, KH
AF Joo, Hyun-Yoo
   Yun, Miyong
   Jeong, Jaemin
   Park, Eun-Ran
   Shin, Hyun-Jin
   Woo, Seon Rang
   Jung, Jin Kyu
   Kim, Yong-Min
   Park, Joong-Jean
   Kim, Joon
   Lee, Kee-Ho
TI SIRT1 deacetylates and stabilizes hypoxia-inducible factor-1 alpha
   (HIF-1 alpha) via direct interactions during hypoxia
SO BIOCHEMICAL AND BIOPHYSICAL RESEARCH COMMUNICATIONS
LA English
DT Article
DE SIRT1; HIF-1 alpha; Stabilization; Deacetylation; Interaction; Invasion
ID PROTEIN-DEGRADATION; FACTOR 1-ALPHA; HIF-ALPHA; HYDROXYLATION;
   METABOLISM; ACTIVATION; mechanism; HIF1-ALPHA; RESPONSES
AB Upon shift to a hypoxic environment, cellular HIF-1 alpha protein is stabilized, with a rapid decline in oxygen-sensitive hydroxylation. Several additional post-translational modification of HIF-1 alpha are critical in controlling protein stability during hypoxia. In the present study, we showed that SIRT1 stabilizes HIF-1 alpha via direct binding and deacetylation during hypoxia. SIRT1 depletion or inactivation led to reduced hypoxic HIF-1 alpha accumulation, accompanied by an increase in HIF-1 alpha acetylation. Impaired HIF-1 alpha accumulation was recovered upon inhibition of 26S proteasome activity, indicating that SIRT1 is essential for HIF-1 alpha stabilization during hypoxia. Consistently, HIF-1 alpha accumulation was enhanced upon overexpression of wild-type SIRT1, but not its dominant-negative form. SIRT1-mediated accumulation of HIFI a protein led to increased expression of HIF-1 alpha target genes, including VEGF, GLUT1 and MMP2, and ultimate promotion of cancer cell invasion. These findings collectively imply that hypoxic HIF-1 alpha stabilization requires SIRT1 activation. Furthermore, SIRT1 protection of HIF-1 alpha from acetylation may be a prerequisite for stabilization and consequent enhancement of cell invasion. (C) 2015 Elsevier Inc. All rights reserved.
C1 [Joo, Hyun-Yoo; Jeong, Jaemin; Park, Eun-Ran; Shin, Hyun-Jin; Woo, Seon Rang; Jung, Jin Kyu; Kim, Yong-Min; Lee, Kee-Ho] Korea Inst Radiol & Med Sci, Div Radiat Canc Res, Seoul 139706, South Korea.
   [Yun, Miyong] Kyung Hee Univ, Coll Med, Dept Otorhinolaryngol Head & Neck Surg, Seoul 130872, South Korea.
   [Park, Joong-Jean] Korea Univ, Coll Med, Dept Physiol, Seoul 136705, South Korea.
   [Joo, Hyun-Yoo; Kim, Joon] Korea Univ, Div Life Sci, Biochem Lab, Seoul 136713, South Korea.
RP Kim, J (corresponding author), Korea Univ, Div Life Sci, Biochem Lab, Seoul 136713, South Korea.
EM joonkim@korea.ac.kr; khlee@kirams.re.kr
RI YUN, MIYONG/S-9433-2019; Jeong, Jaemin/AAD-8899-2021
OI Park, Joong-Jean/0000-0002-4534-3002
FU National Research Foundation of KoreaNational Research Foundation of
   Korea [NRF-2012R1A1A2008457, NRF-2012M3A9B6055346, NRF-2014M3A9A8064818,
   NRF-2012R1A2A1A01009027]; National Nuclear R&D program of the Ministry
   of Science and Technology
FX This work was supported by grants from the National Research Foundation
   of Korea (NRF-2012R1A1A2008457, NRF-2012M3A9B6055346,
   NRF-2014M3A9A8064818 and NRF-2012R1A2A1A01009027) and National Nuclear
   R&D program of the Ministry of Science and Technology.
CR Bartrons R, 2007, J BIOENERG BIOMEMBR, V39, P223, DOI 10.1007/S10863-007-9080-3
   Bell EL, 2011, ONCOGENE, V30, P2986, DOI 10.1038/onc.2011.37
   Bruick RK, 2001, SCIENCE, V294, P1337, DOI 10.1126/science.1066373
   Cote J, 2010, P ROY SOC B-BIOL SCI, V277, P1571, DOI 10.1098/rspb.2009.2128
   Dioum EM, 2009, SCIENCE, V324, P1289, DOI 10.1126/science.1169956
   Finley LWS, 2011, CANCER CELL, V19, P416, DOI 10.1016/j.ccr.2011.02.014
   Haddad JJ, 2002, CELL SIGNAL, V14, P879, DOI 10.1016/S0898-6568(02)00053-0
   Huang LE, 1996, J BIOL CHEM, V271, P32253, DOI 10.1074/jbc.271.50.32253
   Ivan M, 2001, SCIENCE, V292, P464, DOI 10.1126/science.1059817
   Jaakkola P, 2001, SCIENCE, V292, P468, DOI 10.1126/science.1059796
   Jeong J, 2007, EXP MOL MED, V39, P8, DOI 10.1038/emm.2007.2
   Jiang BH, 1997, J BIOL CHEM, V272, P19253, DOI 10.1074/jbc.272.31.19253
   Laemmle A, 2012, PLOS ONE, V7, DOI 10.1371/journal.pone.0033433
   Lee DH, 1996, J BIOL CHEM, V271, P27280, DOI 10.1074/jbc.271.44.27280
   Lim JH, 2010, MOL CELL, V38, P864, DOI 10.1016/j.molcel.2010.05.023
   Semenza GL, 2000, GENE DEV, V14, P1983
   Semenza GL, 2000, BIOCHEM PHARMACOL, V59, P47, DOI 10.1016/S0006-2952(99)00292-0
   Seo KS, 2015, ONCOGENE, V34, P1354, DOI 10.1038/onc.2014.76
   Vaziri H, 2001, CELL, V107, P149, DOI 10.1016/S0092-8674(01)00527-X
   Wei W, 2007, CANCER LETT, V257, P145, DOI 10.1016/j.canlet.2007.08.009
   Yoo YG, 2004, FEBS LETT, V577, P121, DOI 10.1016/j.febslet.2004.10.004
   Yoon H, 2014, BIOCHEM BIOPH RES CO, V444, P36, DOI 10.1016/j.bbrc.2014.01.001
   Zhang T, 2010, BBA-PROTEINS PROTEOM, V1804, P1666, DOI 10.1016/j.bbapap.2009.10.022
   Zhong L, 2010, CELL, V140, P280, DOI 10.1016/j.cell.2009.12.041
NR 24
TC 73
Z9 78
U1 3
U2 16
PU ACADEMIC PRESS INC ELSEVIER SCIENCE
PI SAN DIEGO
PA 525 B ST, STE 1900, SAN DIEGO, CA 92101-4495 USA
SN 0006-291X
EI 1090-2104
J9 BIOCHEM BIOPH RES CO
JI Biochem. Biophys. Res. Commun.
PD JUL 10
PY 2015
VL 462
IS 4
BP 294
EP 300
DI 10.1016/j.bbrc.2015.04.119
PG 7
WC Biochemistry & Molecular Biology; Biophysics
WE Science Citation Index Expanded (SCI-EXPANDED)
SC Biochemistry & Molecular Biology; Biophysics
GA CK9LA
UT WOS:000356560400003
PM 25979359
DA 2022-04-10
ER

PT J
AU Karsdal, MA
   Nielsen, MJ
   Sand, JM
   Henriksen, K
   Genovese, F
   Bay-Jensen, AC
   Smith, V
   Adamkewicz, JI
   Christiansen, C
   Leeming, DJ
AF Karsdal, Morten A.
   Nielsen, Mette J.
   Sand, Jannie M.
   Henriksen, Kim
   Genovese, Federica
   Bay-Jensen, Anne-Christine
   Smith, Victoria
   Adamkewicz, Joanne I.
   Christiansen, Claus
   Leeming, Diana J.
TI Extracellular Matrix Remodeling: The Common Denominator in Connective
   Tissue Diseases Possibilities for Evaluation and Current Understanding
   of the Matrix as More Than a Passive Architecture, but a Key Player in
   Tissue Failure
SO ASSAY AND DRUG DEVELOPMENT TECHNOLOGIES
LA English
DT Review
ID HEPATIC STELLATE CELLS; GLYCATION END-PRODUCT; SINGLE-BASE MUTATION;
   POSTTRANSLATIONAL PROTEIN MODIFICATIONS; MULTIPLE EPIPHYSEAL DYSPLASIA;
   LINKED-IMMUNOSORBENT-ASSAY; ABNORMAL COLLAGEN FIBRILS; HUMAN
   ARTICULAR-CARTILAGE; SUBCHONDRAL BONE CHANGES; C-TERMINAL TELOpeptide
AB Increased attention is paid to the structural components of tissues. These components are mostly collagens and various proteoglycans. Emerging evidence suggests that altered components and noncoded modifications of the matrix may be both initiators and drivers of disease, exemplified by excessive tissue remodeling leading to tissue stiffness, as well as by changes in the signaling potential of both intact matrix and fragments thereof. Although tissue structure until recently was viewed as a simple architecture anchoring cells and proteins, this complex grid may contain essential information enabling the maintenance of the structure and normal functioning of tissue. The aims of this review are to (1) discuss the structural components of the matrix and the relevance of their mutations to the pathology of diseases such as fibrosis and cancer, (2) introduce the possibility that post-translational modification (PTMs), such as protease cleavage, citrullination, cross-linking, nitrosylation, glycosylation, and isomerization, generated during pathology, may be unique, disease-specific biochemical markers, (3) list and review the range of simple enzyme-linked immunosorbent assays (ELISAs) that have been developed for assessing the extracellular matrix (ECM) and detecting abnormal ECM remodeling, and (4) discuss whether some PTMs are the cause or consequence of disease. New evidence clearly suggests that the ECM at some point in the pathogenesis becomes a driver of disease. These pathological modified ECM proteins may allow insights into complicated pathologies in which the end stage is excessive tissue remodeling, and provide unique and more pathology-specific biochemical markers.
C1 [Karsdal, Morten A.; Nielsen, Mette J.; Sand, Jannie M.; Henriksen, Kim; Genovese, Federica; Bay-Jensen, Anne-Christine; Smith, Victoria; Christiansen, Claus; Leeming, Diana J.] Nordic Biosci AS, DK-2730 Herlev, Denmark.
   [Smith, Victoria; Adamkewicz, Joanne I.] Gilead Sci Inc, Dept Biol, Foster City, CA 94404 USA.
RP Karsdal, MA (corresponding author), Nordic Biosci AS, Herlev Hovedgade 207, DK-2730 Herlev, Denmark.
EM mk@nordicbioscience.com
RI Bay-Jensen, Anne C/G-6759-2013
OI Bay-Jensen, Anne C/0000-0001-7952-9297; Genovese,
   Federica/0000-0003-1984-1881; Nielsen, Mette Juul/0000-0002-4448-8955;
   Sand, Jannie Marie Bulow/0000-0002-3239-0934; Karsdal,
   Morten/0000-0001-5026-8740
FU Danish Ministry of Science, Technology, and Science; Danish Science
   Foundation (Den Danske Forskningsfond)
FX We acknowledge funding from the Danish Ministry of Science, Technology,
   and Science, and the Danish Science Foundation (Den Danske
   Forskningsfond).
CR Adair-Kirk TL, 2003, J IMMUNOL, V171, P398, DOI 10.4049/jimmunol.171.1.398
   Adair-Kirk TL, 2008, INT J BIOCHEM CELL B, V40, P1101, DOI 10.1016/j.biocel.2007.12.005
   AHMAD NN, 1993, AM J HUM GENET, V52, P39
   Ahsan H, 2003, CLIN EXP IMMUNOL, V131, P398, DOI 10.1046/j.1365-2249.2003.02104.x
   ALAKOKKO L, 1990, P NATL ACAD SCI USA, V87, P6565, DOI 10.1073/pnas.87.17.6565
   Alexandersen P, 2007, BONE, V40, P218, DOI 10.1016/j.bone.2006.07.028
   Allamand V, 2011, SKELET MUSCLE, V1, DOI 10.1186/2044-5040-1-30
   Ameye L, 2002, FASEB J, V16, DOI 10.1096/fj.01-0848com
   Anderson-MacKenzie JM, 2005, INT J BIOCHEM CELL B, V37, P224, DOI 10.1016/j.biocel.2004.06.016
   Anzilotti C, 2010, AUTOIMMUN REV, V9, P158, DOI 10.1016/j.autrev.2009.06.002
   Arthur MJP, 2000, AM J PHYSIOL-GASTR L, V279, pG245
   Asaga H, 1998, BIOCHEM BIOPH RES CO, V243, P641, DOI 10.1006/bbrc.1998.8148
   ASCH AS, 1987, J CLIN INVEST, V79, P1054, DOI 10.1172/JCI112918
   Asplund A, 2011, ATHEROSCLEROSIS, V215, P77, DOI 10.1016/j.atherosclerosis.2010.12.017
   Attallah AM, 2007, J IMMUNOASS IMMUNOCH, V28, P155, DOI 10.1080/15321810701212088
   Aumailley M, 1998, J MOL MED-JMM, V76, P253, DOI 10.1007/s001090050215
   Babelova A, 2009, J BIOL CHEM, V284, P24035, DOI 10.1074/jbc.M109.014266
   Bailey AJ, 1997, GERONTOLOGY, V43, P296
   Barascuk N, 2011, BIOMARK INSIGHTS, V6, P97, DOI 10.4137/BMI.S7777
   Barascuk N, 2010, CLIN BIOCHEM, V43, P899, DOI 10.1016/j.clinbiochem.2010.03.012
   Barascuk N, 2012, HEPATOL RES IN PRESS
   Barascuk N, 2012, ATHEROSCLER IN PRESS
   Barascuk N, 2011, CLIN BIOCHEM, V44, P900, DOI 10.1016/j.clinbiochem.2011.04.004
   BARKER DF, 1990, SCIENCE, V248, P1224, DOI 10.1126/science.2349482
   Barker HE, 2011, FUTURE ONCOL, V7, P707, DOI [10.2217/FON.11.46, 10.2217/fon.11.46]
   Barry-Hamilton V, 2010, NAT MED, V16, P1009, DOI 10.1038/nm.2208
   Bay-Jensen AC, 2011, CLIN BIOCHEM, V44, P423, DOI 10.1016/j.clinbiochem.2011.01.001
   Bay-Jensen AC, 2010, ASSAY DRUG DEV TECHN, V8, P118, DOI 10.1089/adt.2009.0199
   Bi XL, 2008, CARCINOGENESIS, V29, P1435, DOI 10.1093/carcin/bgn141
   Bignon M, 2011, BLOOD, V118, P3979, DOI 10.1182/blood-2010-10-313296
   BIRK DE, 1988, J CELL BIOL, V106, P999, DOI 10.1083/jcb.106.3.999
   Birk DE, 2001, MICRON, V32, P223, DOI 10.1016/S0968-4328(00)00043-3
   Bissell M J, 1987, Prog Clin Biol Res, V249, P251
   Bissell MJ, 2001, NAT REV CANCER, V1, P46, DOI 10.1038/35094059
   Blomme B, 2011, AM J PHYSIOL-GASTR L, V300, pG833, DOI 10.1152/ajpgi.00228.2010
   Bock HC, 2001, OSTEOARTHR CARTILAGE, V9, P654, DOI 10.1053/joca.2001.0420
   Bone H G, 1992, Ann Ital Med Int, V7, p166S
   Bonnemann CG, 2011, NAT REV NEUROL, V7, P379, DOI 10.1038/nrneurol.2011.81
   Borkham-Kamphorst E, 2007, J HEPATOL, V46, P1064, DOI 10.1016/j.jhep.2007.01.029
   Bosman FT, 2003, J PATHOL, V200, P423, DOI 10.1002/path.1437
   Bosques CJ, 2006, NAT BIOTECHNOL, V24, P1100, DOI 10.1038/nbt0906-1100
   Brandan E, 2006, J BIOL CHEM, V281, P31562, DOI 10.1074/jbc.M602919200
   BRANGE J, 1992, PHARMACEUT RES, V9, P715, DOI 10.1023/A:1015835017916
   BRIGGS MD, 1993, GENOMICS, V18, P656, DOI 10.1016/S0888-7543(05)80369-6
   Briggs MD, 1993, GENEREVIEWS
   Buckley CD, 1999, NATURE, V397, P534, DOI 10.1038/17409
   Byrjalsen I, 2008, OSTEOPOROSIS INT, V19, P339, DOI 10.1007/s00198-007-0462-5
   Callewaert N, 2004, NAT MED, V10, P429, DOI 10.1038/nm1006
   Camby I, 2006, GLYCOBIOLOGY, V16, p137R, DOI 10.1093/glycob/cwl025
   Carlson EC, 2007, J BIOL CHEM, V282, P35502, DOI 10.1074/jbc.M705823200
   Castera L, 2011, BEST PRACT RES CL GA, V25, P291, DOI 10.1016/j.bpg.2011.02.003
   Chaiswing L, 2010, ANTIOXID REDOX SIGN, V13, P449, DOI 10.1089/ars.2009.3020
   Chakravarti S, 2002, GLYCOCONJUGATE J, V19, P287, DOI 10.1023/A:1025348417078
   Chakravarti S, 1998, J CELL BIOL, V141, P1277, DOI 10.1083/jcb.141.5.1277
   Chang XT, 2009, BMC CANCER, V9, DOI 10.1186/1471-2407-9-40
   Chang XT, 2006, MOL CARCINOGEN, V45, P183, DOI 10.1002/mc.20169
   Chen JR, 1998, J RHEUMATOL, V25, P2440
   Chen XD, 2004, FASEB J, V18, P948, DOI 10.1096/fj.03-0899com
   Chen XD, 2002, J BONE MINER RES, V17, P331, DOI 10.1359/jbmr.2002.17.2.331
   Choi JH, 2011, ENVIRON TOXICOL PHAR, V31, P212, DOI 10.1016/j.etap.2010.10.011
   Choi YG, 2009, J IMMUNOASS IMMUNOCH, V30, P386, DOI 10.1080/15321810903188136
   Christgau S, 2000, BONE, V26, P505, DOI 10.1016/S8756-3282(00)00248-9
   Chritiansen C, 2003, OSTEOPOROSIS INT, V14, P609, DOI 10.1007/s00198-003-1409-0
   Clarijs R, 2003, J CELL PHYSIOL, V194, P267, DOI 10.1002/jcp.10214
   CLARK EA, 1995, SCIENCE, V268, P233, DOI 10.1126/science.7716514
   Clark EA, 1998, J CELL BIOL, V142, P573, DOI 10.1083/jcb.142.2.573
   Cloos PAC, 2004, BIOGERONTOLOGY, V5, P139, DOI 10.1023/B:BGEN.0000031152.31352.8b
   Cloos PAC, 2002, MATRIX BIOL, V21, P39, DOI 10.1016/S0945-053X(01)00188-3
   Cloos PAC, 2000, BIOGERONTOLOGY, V1, P341, DOI 10.1023/A:1026534400435
   Cloos PAC, 2000, BIOCHEM J, V345, P473, DOI 10.1042/0264-6021:3450473
   Cloos Paul A C, 2004, Clin Lab, V50, P279
   Cloos Paul A C, 2004, Clin Lab, V50, P585
   COLADO MI, 1994, EUR J PHARMACOL, V252, P291, DOI 10.1016/0014-2999(94)90175-9
   Colell A, 2009, CELL DEATH DIFFER, V16, P1573, DOI 10.1038/cdd.2009.137
   Collard HR, 2010, AM J PHYSIOL-LUNG C, V299, pL3, DOI 10.1152/ajplung.90637.2008
   Collighan RJ, 2009, AMINO ACIDS, V36, P659, DOI 10.1007/s00726-008-0190-y
   Comalada M, 2003, J IMMUNOL, V170, P4450, DOI 10.4049/jimmunol.170.9.4450
   Condeelis J, 2006, CELL, V124, P263, DOI 10.1016/j.cell.2006.01.007
   Conrozier T, 2008, CLIN EXP RHEUMATOL, V26, P430
   Copple BL, 2010, COMPREHENSIVE TOXICOLOGY, VOL 9: HEPATIC TOXICOLOGY, 2ND EDITION, P263
   Corsi A, 2002, J BONE MINER RES, V17, P1180, DOI 10.1359/jbmr.2002.17.7.1180
   Corthay A, 1998, EUR J IMMUNOL, V28, P2580, DOI 10.1002/(SICI)1521-4141(199808)28:08<2580::AID-IMMU2580>3.0.CO;2-X
   Crnkic M, 2003, ARTHRITIS RES THER, V5, pR181, DOI 10.1186/ar760
   Czarny-Ratajczak M, 2001, AM J HUM GENET, V69, P969, DOI 10.1086/324023
   Dam EB, 2009, OSTEOARTHR CARTILAGE, V17, P384, DOI 10.1016/j.joca.2008.07.009
   Dang NN, 2008, EXP DERMATOL, V17, P553, DOI 10.1111/j.1600-0625.2008.00723.x
   Danielson KG, 1997, J CELL BIOL, V136, P729, DOI 10.1083/jcb.136.3.729
   DeGroot J, 2001, ARTHRITIS RHEUM, V44, P2562, DOI 10.1002/1529-0131(200111)44:11<2562::AID-ART437>3.0.CO;2-1
   DeNicola Gina M, 2009, Eur J Cancer, V45 Suppl 1, P211, DOI 10.1016/S0959-8049(09)70036-X
   Desmet VJ, 2004, J HEPATOL, V40, P860, DOI 10.1016/j.jhep.2004.03.007
   Desnoyers L, 2001, J BIOL CHEM, V276, P47599, DOI 10.1074/jbc.M108339200
   Dhanabal M, 1999, J BIOL CHEM, V274, P11721, DOI 10.1074/jbc.274.17.11721
   Di Giovanni C, 2012, EUR BIOPHYS J BIOPHY, V41, P353, DOI 10.1007/s00249-012-0793-9
   Dienstag JL, 2003, GASTROENTEROLOGY, V124, P105, DOI 10.1053/gast.2003.50013
   Dieppe P, 1999, OSTEOARTHR CARTILAGE, V7, P325, DOI 10.1053/joca.1998.0182
   DILLON TJ, 1992, AM REV RESPIR DIS, V146, P1143, DOI 10.1164/ajrccm/146.5_Pt_1.1143
   DOLBERG DS, 1984, NATURE, V309, P552, DOI 10.1038/309552a0
   Doyle HA, 2001, TRENDS IMMUNOL, V22, P443, DOI 10.1016/S1471-4906(01)01976-7
   Doyle HA, 2001, IMMUNOL RES, V24, P131, DOI 10.1385/IR:24:2:131
   Duca L, 2004, CRIT REV ONCOL HEMAT, V49, P235, DOI 10.1016/j.critrevonc.2003.09.007
   Egeblad M, 2002, NAT REV CANCER, V2, P161, DOI 10.1038/nrc745
   Elli L, 2009, DIGEST LIVER DIS, V41, P541, DOI 10.1016/j.dld.2008.12.095
   ENGVALL E, 1986, J CELL BIOL, V102, P703, DOI 10.1083/jcb.102.3.703
   Erler JT, 2009, CLIN EXP METASTAS, V26, P35, DOI 10.1007/s10585-008-9209-8
   Erler JT, 2006, NATURE, V440, P1222, DOI 10.1038/nature04695
   Fang M, 2010, MOL CANCER, V9, DOI 10.1186/1476-4598-9-215
   Faux SP, 2009, biomarkersS, V14, P90, DOI 10.1080/13547500902965047
   Felson DT, 2004, ARTHRITIS RHEUM-US, V50, P341, DOI 10.1002/art.20051
   Fernandes RJ, 1998, ARCH BIOCHEM BIOPHYS, V355, P282, DOI 10.1006/abbi.1998.0745
   Fernandez M, 2009, J HEPATOL, V50, P604, DOI 10.1016/j.jhep.2008.12.011
   FESSLER LI, 1986, J BIOL CHEM, V261, P5034
   Fiedler LR, 2008, J BIOL CHEM, V283, P17406, DOI 10.1074/jbc.M710025200
   Fledelius C, 1997, J BIOL CHEM, V272, P9755
   FLEISCHMAJER R, 1990, J STRUCT BIOL, V105, P162, DOI 10.1016/1047-8477(90)90110-X
   Forbes SJ, 2004, GASTROENTEROLOGY, V126, P955, DOI 10.1053/j.gastro.2004.02.025
   Freitas VM, 2007, AM J PATHOL, V171, P124, DOI 10.2353/ajpath.2007.051264
   Friedman SL, 2008, PHYSIOL REV, V88, P125, DOI 10.1152/physrev.00013.2007
   Friedman SL, 2008, TOXICOLOGY, V254, P120, DOI 10.1016/j.tox.2008.06.013
   Friedman SL, 2003, J HEPATOL, V38, pS38, DOI 10.1016/S0168-8278(02)00429-4
   Fujii N, 1997, EXP EYE RES, V65, P99, DOI 10.1006/exer.1997.0315
   Fujii N, 1999, MECH AGEING DEV, V107, P347, DOI 10.1016/S0047-6374(98)00129-8
   Funderburgh JL, 1997, J BIOL CHEM, V272, P28089, DOI 10.1074/jbc.272.44.28089
   Funderburgh JL, 1997, INVEST OPHTH VIS SCI, V38, P1159
   Gallagher WM, 2005, TRENDS MOL MED, V11, P336, DOI 10.1016/j.molmed.2005.06.001
   Garnero P, 2003, J BONE MINER RES, V18, P859, DOI 10.1359/jbmr.2003.18.5.859
   Garnero P, 2000, BRIT J CANCER, V82, P858, DOI 10.1054/bjoc.1999.1012
   Gauldie J, 2007, BIOCHEM SOC T, V35, P661, DOI 10.1042/BST0350661
   Gelse K, 2003, ADV DRUG DELIVER REV, V55, P1531, DOI 10.1016/j.addr.2003.08.002
   Ghany MG, 2009, HEPATOLOGY, V49, P1335, DOI 10.1002/hep.22759
   Gill MR, 2002, OSTEOARTHR CARTILAGE, V10, P751, DOI 10.1053/joca.2002.0527
   Girbal-Neuhauser E, 1999, J IMMUNOL, V162, P585
   Goldoni S, 2009, J CELL BIOL, V185, P743, DOI 10.1083/jcb.200901129
   GOOD DJ, 1990, P NATL ACAD SCI USA, V87, P6624, DOI 10.1073/pnas.87.17.6624
   Grenard P, 2001, J HEPATOL, V35, P367, DOI 10.1016/S0168-8278(01)00135-0
   Gressner OA, 2007, J CELL MOL MED, V11, P1031, DOI 10.1111/j.1582-4934.2007.00092.x
   Griffiths HR, 2008, AUTOIMMUN REV, V7, P544, DOI 10.1016/j.autrev.2008.04.013
   Guidetti GF, 2004, FEBS LETT, V574, P95, DOI 10.1016/j.febslet.2004.08.011
   Guyot C, 2006, INT J BIOCHEM CELL B, V38, P135, DOI 10.1016/j.biocel.2005.08.021
   Gyorgy B, 2006, INT J BIOCHEM CELL B, V38, P1662, DOI 10.1016/j.biocel.2006.03.008
   Haass NK, 2004, J MOL HISTOL, V35, P309
   Hamano Y, 2003, CANCER CELL, V3, P589, DOI 10.1016/S1535-6108(03)00133-8
   Hammel P, 2001, NEW ENGL J MED, V344, P418, DOI 10.1056/NEJM200102083440604
   Hanash SM, 2008, NATURE, V452, P571, DOI 10.1038/nature06916
   Hayward C, 1997, HUM MUTAT, V10, P415, DOI 10.1002/(SICI)1098-1004(1997)10:6<415::AID-HUMU1>3.0.CO;2-C
   Heathfield TF, 2004, J BIOL CHEM, V279, P6286, DOI 10.1074/jbc.M307765200
   Heegaard AM, 2007, CIRCULATION, V115, P2731, DOI 10.1161/CIRCULATIONAHA.106.653980
   Heinz A, 2011, BIOCHIMIE
   Heinz A, 2010, FEBS J, V277, P1939, DOI 10.1111/j.1742-4658.2010.07616.x
   Hemmann S, 2007, J HEPATOL, V46, P955, DOI 10.1016/j.jhep.2007.02.003
   Hinz B, 2007, AM J PATHOL, V170, P1807, DOI 10.2353/ajpath.2007.070112
   Hopkinson A, 2006, J PROTEOME RES, V5, P2226, DOI 10.1021/pr050425q
   Houghton AM, 2006, J CLIN INVEST, V116, P753, DOI 10.1172/JCI25617
   Hynes RO, 2007, J THROMB HAEMOST, V5, P32, DOI 10.1111/j.1538-7836.2007.02569.x
   Hynes RO, 2009, SCIENCE, V326, P1216, DOI 10.1126/science.1176009
   Hynes RO, 2004, MATRIX BIOL, V23, P333, DOI 10.1016/j.matbio.2004.08.001
   Hynes RO, 2003, SCIENCE, V300, P755, DOI 10.1126/science.1084854
   Hynes RO, 2002, CELL, V110, P673, DOI 10.1016/S0092-8674(02)00971-6
   Iacob D, 2008, ENDOCRINOLOGY, V149, P6187, DOI 10.1210/en.2008-0780
   Inagaki Y, 2007, GUT, V56, P284, DOI 10.1136/gut.2005.088690
   Ingber DE, 2008, SEMIN CANCER BIOL, V18, P356, DOI 10.1016/j.semcancer.2008.03.016
   Ingman WV, 2006, DEV DYNAM, V235, P3222, DOI 10.1002/dvdy.20972
   Inkson CA, 2009, CELLS TISSUES ORGANS, V189, P153, DOI 10.1159/000151377
   Iredale JP, 2007, J CLIN INVEST, V117, P539, DOI 10.1172/JCI30542
   Issa R, 2004, GASTROENTEROLOGY, V126, P1795, DOI 10.1053/j.gastro.2004.03.009
   Jackson GC, 2012, HUM MUTAT, V33, P144, DOI 10.1002/humu.21611
   Jakob A, 2011, CARDIOL YOUNG, V21, P62, DOI 10.1017/S1047951110001563
   Jensen LT, 1997, DAN MED BULL, V44, P70
   Jensen VK, 2011, ASSAY DRUG DEV TECHN, V9, P157, DOI 10.1089/adt.2010.0272
   Jepsen KJ, 2002, J BIOL CHEM, V277, P35532, DOI 10.1074/jbc.M205398200
   Johansen JS, 2006, DAN MED BULL, V53, P172
   JOHNSON BA, 1990, BIOCHEMISTRY-US, V29, P4373, DOI 10.1021/bi00470a017
   Jussila T, 2004, EUR J OBSTET GYN R B, V115, P66, DOI 10.1016/S0301-2115(02)00406-2
   Kadler KE, 1996, BIOCHEM J, V316, P1
   Kalluri R, 2003, J CLIN INVEST, V112, P1776, DOI 10.1172/JCI200320530
   Karsdal MA, 2008, OSTEOPOROSIS INT, V19, P1355, DOI 10.1007/s00198-008-0603-5
   Karsdal MA, 2008, OSTEOARTHR CARTILAGE, V16, P638, DOI 10.1016/j.joca.2008.01.014
   Karsdal MA, 2011, CLIN BIOCHEM, V44, P1278, DOI 10.1016/j.clinbiochem.2011.08.1135
   Karsdal MA, 2009, biomarkersS, V14, P181, DOI 10.1080/13547500902777608
   Karsdal MA, 2002, J BIOL CHEM, V277, P44061, DOI 10.1074/jbc.M207205200
   Karsdal MA, 2011, ARTHRITIS RES THER, V13, DOI 10.1186/ar3280
   Karsdal MA, 2008, ARTHRITIS RES THER, V10, DOI 10.1186/ar2434
   Karsdal MA, 2007, ARTHRITIS RHEUM-US, V56, P1549, DOI 10.1002/art.22599
   Karsdal MA, 2010, CLIN BIOCHEM, V43, P793, DOI 10.1016/j.clinbiochem.2010.03.015
   Karumanchi SA, 2001, MOL CELL, V7, P811, DOI 10.1016/S1097-2765(01)00225-8
   Kaspar M, 2006, INT J CANCER, V118, P1331, DOI 10.1002/IJC.21677
   Kass L, 2007, INT J BIOCHEM CELL B, V39, P1987, DOI 10.1016/j.biocel.2007.06.025
   Kerkela E, 2003, EXP DERMATOL, V12, P109, DOI 10.1034/j.1600-0625.2003.120201.x
   Kielty Cay M., 2006, Expert Reviews in Molecular Medicine, V8, P1, DOI 10.1017/S146239940600007X
   Kielty CM, 2002, J CELL SCI, V115, P2817
   Kim JH, 2002, BIOCHEM BIOPH RES CO, V293, P1453, DOI 10.1016/S0006-291X(02)00393-5
   Kim KK, 2009, J CLIN INVEST, V119, P213, DOI 10.1172/JCI36940
   Kim YM, 2011, MOL BIOL REP, V38, P145, DOI 10.1007/s11033-010-0088-0
   Kinnman N, 2003, LAB INVEST, V83, P163, DOI 10.1097/01.LAB.0000054178.01162.E4
   Kitaya K, 2009, J LEUKOCYTE BIOL, V85, P391, DOI 10.1189/jlb.0908535
   Klein A, 2010, PROTEOM CLIN APPL, V4, P379, DOI 10.1002/prca.200900133
   Koivula MK, 2012, ANN RHEUM DIS, V71, P1666, DOI 10.1136/annrheumdis-2011-200848
   Kolb M, 2001, AM J PHYSIOL-LUNG C, V280, pL1327, DOI 10.1152/ajplung.2001.280.6.L1327
   KONTUSAARI S, 1990, J CLIN INVEST, V86, P1465, DOI 10.1172/JCI114863
   Kowluru RA, 2006, INVEST OPHTH VIS SCI, V47, P1594, DOI 10.1167/iovs.05-1276
   Kralev S, 2009, CLIN CHEM LAB MED, V47, P446, DOI 10.1515/CCLM.2009.100
   Kruegel J, 2010, CELL MOL LIFE SCI, V67, P2879, DOI 10.1007/s00018-010-0367-x
   Krueger KE, 2006, MOL CELL PROTEOMICS, V5, P1799, DOI 10.1074/mcp.R600009-MCP200
   Kurien BT, 2008, AUTOIMMUN REV, V7, P567, DOI 10.1016/j.autrev.2008.04.019
   Kurien Biji T., 2006, Indian Journal of Experimental Biology, V44, P349
   Lai KKY, 2011, PLOS GENET, V7, DOI 10.1371/journal.pgen.1002147
   Lampe AK, 2005, J MED GENET, V42, P673, DOI 10.1136/jmg.2002.002311
   Lapolla A, 2005, CLIN BIOCHEM, V38, P103, DOI 10.1016/j.clinbiochem.2004.09.007
   Leeming DJ, 2006, EUR J CLIN PHARMACOL, V62, P781, DOI 10.1007/s00228-006-0174-3
   Leeming DJ, 2011, biomarkersS, V16, P616, DOI 10.3109/1354750X.2011.620628
   Leeming DJ, 2011, biomarkersS, V16, P193, DOI 10.3109/1354750X.2011.557440
   Leeming DJ, 2009, OSTEOPOROSIS INT, V20, P1461, DOI 10.1007/s00198-009-0904-3
   Leeming DJ, 2006, CANCER EPIDEM BIOMAR, V15, P1392, DOI 10.1158/1055-9965.EPI-05-0909
   Leeming DJ, 2012, HEPATOL RES, V42, P482, DOI 10.1111/j.1872-034X.2011.00946.x
   Leeming DJ, 2008, BMC CANCER, V8, DOI 10.1186/1471-2407-8-180
   Leeming DJ, 2006, CANCER EPIDEM BIOMAR, V15, P32, DOI 10.1158/1055-9965.EPI-05-0492
   Levental KR, 2009, CELL, V139, P891, DOI 10.1016/j.cell.2009.10.027
   Li YJ, 2011, J EXP MED, V208, P1459, DOI 10.1084/jem.20102510
   Lin HC, 2001, INVEST OPHTH VIS SCI, V42, P2517
   Lin WR, 2008, CELLS TISSUES ORGANS, V188, P178, DOI 10.1159/000113530
   Liu XQ, 2004, NAT GENET, V36, P178, DOI 10.1038/ng1297
   Lochter A, 1999, APMIS, V107, P128, DOI 10.1111/j.1699-0463.1999.tb01535.x
   Lowin T, 2011, ARTHRITIS RES THER, V13, DOI 10.1186/ar3464
   Lu YP, 2002, PATHOL INT, V52, P519, DOI 10.1046/j.1440-1827.2002.01384.x
   Lu JM, 2010, J CELL MOL MED, V14, P840, DOI 10.1111/j.1582-4934.2009.00897.x
   Luisetti M, 2008, EUR RESPIR J, V32, P1146, DOI 10.1183/09031936.00174807
   Ma QY, 2010, MOL CELL ENDOCRINOL, V321, P239, DOI 10.1016/j.mce.2010.02.021
   Ma SR, 2003, P NATL ACAD SCI USA, V100, P12941, DOI 10.1073/pnas.2235344100
   Maharaj SS, 2012, PULM PHARMACOL THER, V25, P263, DOI 10.1016/j.pupt.2011.09.002
   Maki JM, 2005, AM J PATHOL, V167, P927, DOI 10.1016/S0002-9440(10)61183-2
   Makitie O, 2010, J ORTHOP RES, V28, P1497, DOI 10.1002/jor.21161
   Mamula MJ, 1999, J BIOL CHEM, V274, P22321, DOI 10.1074/jbc.274.32.22321
   Mamula MJ, 1998, IMMUNOL REV, V164, P231, DOI 10.1111/j.1600-065X.1998.tb01223.x
   Marciniak SJ, 2009, THORAX, V64, P359, DOI 10.1136/thx.2008.099408
   MARTINEZHERNANDEZ A, 1993, VIRCHOWS ARCH A, V423, P77, DOI 10.1007/BF01606580
   MARTINEZHERNANDEZ A, 1993, VIRCHOWS ARCH A, V423, P1, DOI 10.1007/BF01606425
   Marx J, 2004, SCIENCE, V306, P966, DOI 10.1126/science.306.5698.966
   Masson-Bessiere C, 2001, J IMMUNOL, V166, P4177, DOI 10.4049/jimmunol.166.6.4177
   Mecham RP, 1997, J BIOL CHEM, V272, P18071, DOI 10.1074/jbc.272.29.18071
   Melchior-Becker A, 2011, J BIOL CHEM, V286, P17365, DOI 10.1074/jbc.M110.192682
   Merline R, 2009, J CELL COMMUN SIGNAL, V3, P323, DOI 10.1007/s12079-009-0066-2
   Michelacci YM, 2003, BRAZ J MED BIOL RES, V36, P1037, DOI 10.1590/S0100-879X2003000800009
   Milewicz DM, 2000, MATRIX BIOL, V19, P471, DOI 10.1016/S0945-053X(00)00099-8
   MINTZ B, 1975, P NATL ACAD SCI USA, V72, P3585, DOI 10.1073/pnas.72.9.3585
   Miyata T, 1998, BIOCHEM BIOPH RES CO, V244, P45, DOI 10.1006/bbrc.1998.8203
   Moeller A, 2009, AM J RESP CRIT CARE, V179, P588, DOI 10.1164/rccm.200810-1534OC
   Monfort J, 2006, ARTHRITIS RES THER, V8, DOI 10.1186/ar1873
   Monneaux F, 2003, EUR J IMMUNOL, V33, P287, DOI 10.1002/immu.200310002
   Moreira RK, 2007, ARCH PATHOL LAB MED, V131, P1728
   Moreno M, 2005, EMBO J, V24, P1397, DOI 10.1038/sj.emboj.7600615
   Moreno-Bueno G, 2011, EMBO MOL MED, V3, P528, DOI 10.1002/emmm.201100156
   Mormone E, 2012, GASTROENTEROLOGY, V142, P612, DOI 10.1053/j.gastro.2011.11.029
   MOSCARELLO MA, 1994, J CLIN INVEST, V94, P146, DOI 10.1172/JCI117300
   Mundel TM, 2007, MICROVASC RES, V74, P85, DOI 10.1016/j.mvr.2007.05.005
   Mydel P, 2008, J BIOL CHEM, V283, P9513, DOI 10.1074/jbc.M706239200
   Naito Zenya, 2005, Journal of Nippon Medical School, V72, P137, DOI 10.1272/jnms.72.137
   Newkirk MM, 2003, ARTHRITIS RES THER, V5, pR82, DOI 10.1186/ar622
   Nili N, 2003, AM J PATHOL, V163, P869, DOI 10.1016/S0002-9440(10)63447-5
   O'Brien LE, 2001, NAT CELL BIOL, V3, P831, DOI 10.1038/ncb0901-831
   O'Connell K, 2011, INT J SPORTS MED, V32, P896, DOI 10.1055/s-0031-1277181
   Oestergaard S, 2006, OSTEOARTHR CARTILAGE, V14, P670, DOI 10.1016/j.joca.2006.01.004
   OReilly MS, 1997, CELL, V88, P277, DOI 10.1016/S0092-8674(00)81848-6
   PALOTIE A, 1989, LANCET, V1, P924
   Parikka V, 2005, MATRIX BIOL, V24, P438, DOI 10.1016/j.matbio.2005.06.009
   Park SH, 1997, AM J RESP CRIT CARE, V156, P600, DOI 10.1164/ajrccm.156.2.9607123
   Paszek MJ, 2005, CANCER CELL, V8, P241, DOI 10.1016/j.ccr.2005.08.010
   Patino Maria G, 2002, Implant Dent, V11, P280, DOI 10.1097/00008505-200207000-00014
   PAULSSON M, 1981, BIOCHEM J, V197, P367, DOI 10.1042/bj1970367
   Pedersen JA, 2005, ANN BIOMED ENG, V33, P1469, DOI 10.1007/s10439-005-8159-4
   Pedersen JA, 2010, J BIOMECH, V43, P900, DOI 10.1016/j.jbiomech.2009.11.007
   Peng L, 2009, CARCINOGENESIS, V30, P1660, DOI 10.1093/carcin/bgp178
   Petersen E, 2001, EUR J VASC ENDOVASC, V22, P48, DOI 10.1053/ejvs.2001.1404
   PFISTER RR, 1995, INVEST OPHTH VIS SCI, V36, P1306
   Poynard T, 2002, GASTROENTEROLOGY, V122, P1303, DOI 10.1053/gast.2002.33023
   Poyton RO, 2009, TRENDS ENDOCRIN MET, V20, P332, DOI 10.1016/j.tem.2009.04.001
   Pritzker LB, 2000, BIOCHEMISTRY-US, V39, P5382, DOI 10.1021/bi9925571
   Pulichino AM, 2008, AM J RESP CELL MOL, V39, P324, DOI 10.1165/rcmb.2007-0186OC
   Quan TE, 2004, INT J BIOCHEM CELL B, V36, P598, DOI 10.1016/j.biocel.2003.10.005
   Quintana DJ, 2008, OSTEOARTHR CARTILAGE, V16, P1192, DOI 10.1016/j.joca.2008.03.006
   Qvist P, 2002, BONE, V31, P57, DOI 10.1016/S8756-3282(02)00791-3
   Qvist P, 2010, biomarkersS, V15, P1, DOI 10.3109/13547500903295873
   Rabinovich GA, 2005, BRIT J CANCER, V92, P1188, DOI 10.1038/sj.bjc.6602493
   Radisky DC, 2004, SCIENCE, V303, P775, DOI 10.1126/science.1094412
   Richards AJ, 1998, J MED GENET, V35, P846, DOI 10.1136/jmg.35.10.846
   Riehl A, 2009, CELL COMMUN SIGNAL, V7, DOI 10.1186/1478-811X-7-12
   Rock JR, 2011, P NATL ACAD SCI USA, V108, pE1475, DOI 10.1073/pnas.1117988108
   Rodriguez HM, 2010, J BIOL CHEM, V285, P20964, DOI 10.1074/jbc.M109.094136
   ROJKIND M, 1979, GASTROENTEROLOGY, V76, P710
   Rosenquist C, 1998, CLIN CHEM, V44, P2281
   Rousseau JC, 2004, OSTEOARTHR CARTILAGE, V12, P440, DOI 10.1016/j.joca.2004.02.004
   Ruiter D, 2002, LANCET ONCOL, V3, P35, DOI 10.1016/S1470-2045(01)00620-9
   Ruiz PA, 2012, FIBROGENESIS TISSUE, V5, DOI 10.1186/1755-1536-5-3
   Ruoslahti E, 1996, ANNU REV CELL DEV BI, V12, P697, DOI 10.1146/annurev.cellbio.12.1.697
   Saile B, 2007, Z GASTROENTEROL, V45, P77, DOI 10.1055/s-2006-927395
   Santala M, 2004, ANTICANCER RES, V24, P1057
   Santala M, 1999, CLIN CANCER RES, V5, P4091
   Saudek Deborah M, 2003, Curr Rheumatol Rep, V5, P33, DOI 10.1007/s11926-003-0081-x
   Sawyers CL, 2008, NATURE, V452, P548, DOI 10.1038/nature06913
   Schaefer L, 2005, J CLIN INVEST, V115, P2223, DOI 10.1172/JCI23755
   Schaefer L, 2007, AM J PATHOL, V170, P301, DOI 10.2353/ajpath.2007.060497
   Schaller S, 2005, ASSAY DRUG DEV TECHN, V3, P553, DOI 10.1089/adt.2005.3.553
   Schetter AJ, 2010, CARCINOGENESIS, V31, P37, DOI 10.1093/carcin/bgp272
   SCHUPPAN D, 1991, J HEPATOL, V13, pS17, DOI 10.1016/0168-8278(91)90004-U
   SCHUPPAN D, 1990, SEMIN LIVER DIS, V10, P1, DOI 10.1055/s-2008-1040452
   Schuppan D, 2001, SEMIN LIVER DIS, V21, P351, DOI 10.1055/s-2001-17556
   Schwabe RF, 2003, AM J PHYSIOL-GASTR L, V285, pG949, DOI 10.1152/ajpgi.00215.2003
   Schwartz AV, 2009, J CLIN ENDOCR METAB, V94, P2380, DOI 10.1210/jc.2008-2498
   Segovia-Silvestre T, 2011, FIBROGENESIS TISSUE, V4, DOI 10.1186/1755-1536-4-19
   Seidler DG, 2006, J BIOL CHEM, V281, P26408, DOI 10.1074/jbc.M602853200
   SENIOR RM, 1984, J CELL BIOL, V99, P870, DOI 10.1083/jcb.99.3.870
   Senolt L, 2005, ANN RHEUM DIS, V64, P886, DOI 10.1136/ard.2004.029140
   Sheikh Z, 2007, AUTOIMMUNITY, V40, P512, DOI 10.1080/08916930701574331
   Shi HB, 2007, BLOOD, V110, P2899, DOI 10.1182/blood-2007-01-064428
   Simojoki M, 2001, GYNECOL ONCOL, V82, P110, DOI 10.1006/gyno.2001.6212
   Sjoberg AP, 2009, MOL IMMUNOL, V46, P830, DOI 10.1016/j.molimm.2008.09.018
   Sjoberg JS, 2009, REJUV RES, V12, P137, DOI 10.1089/rej.2009.0846
   Skjot-Arkil H, 2012, CLIN EXP RHEUMATOL, V30, P371
   Skjot-Arkil H, 2012, ASSAY DRUG DEV TECHN, V10, P69, DOI 10.1089/adt.2010.0366
   Skjot-Arkil H, 2010, ASSAY DRUG DEV TECHN, V8, P542, DOI 10.1089/adt.2009.0258
   Smith BC, 2009, BBA-GENE REGUL MECH, V1789, P45, DOI 10.1016/j.bbagrm.2008.06.005
   Sondergaard BC, 2006, OSTEOARTHR CARTILAGE, V14, P738, DOI 10.1016/j.joca.2006.01.016
   Song T, 2012, GYNECOL ONCOL, V125, P427, DOI 10.1016/j.ygyno.2012.01.030
   Spickett CM, 2006, BBA-PROTEINS PROTEOM, V1764, P1823, DOI 10.1016/j.bbapap.2006.09.013
   Suki B, 2005, J APPL PHYSIOL, V98, P1892, DOI 10.1152/japplphysiol.01087.2004
   Svensson L, 1999, J BIOL CHEM, V274, P9636, DOI 10.1074/jbc.274.14.9636
   SYKES B, 1990, AM J HUM GENET, V46, P293
   Taddese S, 2009, MATRIX BIOL, V28, P84, DOI 10.1016/j.matbio.2008.12.002
   Tager AM, 2008, NAT MED, V14, P45, DOI 10.1038/nm1685
   Takahashi M, 1997, BRIT J RHEUMATOL, V36, P637
   Taylor SH, 2011, PLOS ONE, V6, DOI 10.1371/journal.pone.0016337
   Tlsty TD, 2006, ANNU REV PATHOL-MECH, V1, P119, DOI 10.1146/annurev.pathol.1.110304.100224
   Treweek JB, 2009, ACCOUNTS CHEM RES, V42, P659, DOI 10.1021/ar800247d
   Trigwell SM, 2001, CLIN EXP IMMUNOL, V126, P242, DOI 10.1046/j.1365-2249.2001.01653.x
   Trocme C, 2006, J VIRAL HEPATITIS, V13, P643, DOI 10.1111/j.1365-2893.2006.00730.x
   TROMP G, 1989, J BIOL CHEM, V264, P19313
   Tufvesson E, 2003, J CELL SCI, V116, P4857, DOI 10.1242/jcs.00808
   Tufvesson E, 2002, FEBS LETT, V530, P124, DOI 10.1016/S0014-5793(02)03439-7
   Van Agtmael T, 2010, HUM MOL GENET, V19, P1119, DOI 10.1093/hmg/ddp584
   Van Agtmael T, 2010, CELL TISSUE RES, V339, P167, DOI 10.1007/s00441-009-0866-y
   van Stipdonk MJB, 1998, INT IMMUNOL, V10, P943, DOI 10.1093/intimm/10.7.943
   Vanderschaeghe D, 2009, MOL CELL PROTEOMICS, V8, P986, DOI 10.1074/mcp.M800470-MCP200
   Vassiliadis E, 2012, AM J TRANSL RES, V4, P403
   Vassiliadis E, 2012, J TRANSL MED, V10, DOI 10.1186/1479-5876-10-140
   Vassiliadis E, 2011, biomarkersS, V16, P426, DOI 10.3109/1354750X.2011.584131
   Vassiliadis E, 2011, BIOMARK INSIGHTS, V6, P49, DOI 10.4137/BMI.S6347
   Veidal SS, 2011, FIBROGENESIS TISSUE, V4, DOI 10.1186/1755-1536-4-22
   Veidal SS, 2010, LIVER INT, V30, P1293, DOI 10.1111/j.1478-3231.2010.02309.x
   Veidal SS, 2011, PLOS ONE, V6, DOI 10.1371/journal.pone.0024753
   Veidal SS, 2010, FIBROGENESIS TISSUE, V3, DOI 10.1186/1755-1536-3-5
   Veidal SS, 2010, DIS MARKERS, V28, P15, DOI [10.1155/2010/548263, 10.3233/DMA-2010-0678]
   Veidal SS, CLIN BIOCH, V45, P541
   Vij N, 2004, EXP EYE RES, V78, P957, DOI 10.1016/j.exer.2003.12.006
   VOORTER CEM, 1988, J BIOL CHEM, V263, P19020
   Wagner E, 2009, RHEUMATOL INT, V29, P1315, DOI 10.1007/s00296-009-0854-2
   Wallace K, 2008, BIOCHEM J, V411, P1, DOI 10.1042/BJ20071570
   Walsh KM, 2000, J HEPATOL, V32, P325, DOI 10.1016/S0168-8278(00)80079-3
   Wang XB, 2005, COMP BIOCHEM PHYS B, V140, P665, DOI 10.1016/j.cbpc.2005.01.010
   Wang XQ, 1998, MOL BIOL CELL, V9, P865, DOI 10.1091/mbc.9.4.865
   Wang YH, 2007, EXP BIOL MED, V232, P1152, DOI 10.3181/0701-RM-8
   Weathington NM, 2006, NAT MED, V12, P317, DOI 10.1038/nm1361
   WEIL D, 1990, J BIOL CHEM, V265, P16007
   Weinberg F, 2009, ANN NY ACAD SCI, V1177, P66, DOI 10.1111/j.1749-6632.2009.05039.x
   Wells RG, 2008, CLIN LIVER DIS, V12, P759, DOI 10.1016/j.cld.2008.07.008
   Wendel DP, 2000, AM J RESP CELL MOL, V23, P320, DOI 10.1165/ajrcmb.23.3.3906
   Wenstrup RJ, 2000, AM J HUM GENET, V66, P1766, DOI 10.1086/302930
   Wenstrup RJ, 2004, J BIOL CHEM, V279, P53331, DOI 10.1074/jbc.M409622200
   Wight TN, 2004, CIRC RES, V94, P1158, DOI 10.1161/01.RES.0000126921.29919.51
   Winding B, 2002, CLIN CANCER RES, V8, P1932
   Wipff PJ, 2007, J CELL BIOL, V179, P1311, DOI 10.1083/jcb.200704042
   Woelfle JV, 2011, J ORTHOP SCI, V16, P245, DOI 10.1007/s00776-011-0021-y
   Wu F, 2007, J BIOL CHEM, V282, P26409, DOI 10.1074/jbc.M702402200
   Wynn TA, 2008, J PATHOL, V214, P199, DOI 10.1002/path.2277
   Wynn TA, 2007, J CLIN INVEST, V117, P524, DOI 10.1172/JCI31487
   Wynn TA, 2011, J EXP MED, V208, P1339, DOI 10.1084/jem.20110551
   Wynn TA, 2010, SEMIN LIVER DIS, V30, P245, DOI 10.1055/s-0030-1255354
   Xu JG, 2007, AM J RESP CELL MOL, V37, P291, DOI 10.1165/rcmb.2006-0187OC
   Xu TS, 1998, NAT GENET, V20, P78, DOI 10.1038/1746
   Yamamoto M, 2008, J CLIN ENDOCR METAB, V93, P1013, DOI 10.1210/jc.2007-1270
   Yamamoto M, 2009, DIABETES CARE, V32, P2263, DOI 10.2337/dc09-0901
   YANAGISHITA M, 1993, ACTA PATHOL JAPON, V43, P283
   Yilmaz Y, 2009, ALIMENT PHARM THER, V30, P1103, DOI 10.1111/j.1365-2036.2009.04148.x
   Ylisirnio S, 2001, CLIN CANCER RES, V7, P1633
   Ylisirnio S, 1999, ANTICANCER RES, V19, P5577
   Yoshida N, 2005, METABOLISM, V54, P345, DOI 10.1016/j.metabol.2004.09.014
   Young AL, 2001, J BIOL CHEM, V276, P37161, DOI 10.1074/jbc.M106682200
   Young MF, 2002, GLYCOCONJUGATE J, V19, P257, DOI 10.1023/A:1025336114352
   Yu AE, 1997, DRUG AGING, V11, P229, DOI 10.2165/00002512-199711030-00006
   YURCHENCO PD, 1990, FASEB J, V4, P1577, DOI 10.1096/fasebj.4.6.2180767
   ZAMVIL SS, 1986, NATURE, V324, P258, DOI 10.1038/324258a0
   Zhen EY, 2008, ARTHRITIS RHEUM-US, V58, P2420, DOI 10.1002/art.23654
   Zheng CX, 2009, ONCOL REP, V22, P1057, DOI 10.3892/or_00000536
   ZHU GG, 1995, CANCER, V75, P1010, DOI 10.1002/1097-0142(19950215)75:4<1010::AID-CNCR2820750417>3.0.CO;2-O
NR 391
TC 174
Z9 175
U1 0
U2 45
PU MARY ANN LIEBERT, INC
PI NEW ROCHELLE
PA 140 HUGUENOT STREET, 3RD FL, NEW ROCHELLE, NY 10801 USA
SN 1540-658X
EI 1557-8127
J9 ASSAY DRUG DEV TECHN
JI ASSAY DRUG DEV. TECHNOL.
PD MAR
PY 2013
VL 11
IS 2
BP 70
EP 92
DI 10.1089/adt.2012.474
PG 23
WC Biochemical Research Methods; Pharmacology & Pharmacy
WE Science Citation Index Expanded (SCI-EXPANDED)
SC Biochemistry & Molecular Biology; Pharmacology & Pharmacy
GA 104ME
UT WOS:000315996600001
PM 23046407
OA Green Published
DA 2022-04-10
ER

PT J
AU Doubleday, PF
   Fornelli, L
   Kelleher, NL
AF Doubleday, Peter F.
   Fornelli, Luca
   Kelleher, Neil L.
TI Elucidating Proteoform Dynamics Underlying the Senescence Associated
   Secretory Phenotype
SO JOURNAL OF PROTEOME RESEARCH
LA English
DT Article
DE top-down proteomics; senescence; quantitative proteomics; secretome;
   proteoform
ID IN-VIVO; post-translational modification; DIFFERENTIAL EXPRESSION;
   CHROMATIN-STRUCTURE; CELLS; PROTEINS; APOPTOSIS; PHOSPHORYLATION;
   IDENTIFICATION; ENRICHMENT
AB Primary diploid cells exit the cell cycle in response to exogenous stress or oncogene activation through a process known as cellular senescence. This cell-autonomous tumor-suppressive mechanism is also a major mechanism operative in organismal aging. To date, temporal aspects of senescence remain understudied. Therefore, we use quantitative proteomics to investigate changes following forced HRAS(G12V) expression and induction of senescence across 1 week in normal diploid fibroblasts. We demonstrate that global intracellular proteomic changes correlate with the emergence of the senescence-associated secretory phenotype and the switch to robust cell cycle exit. The senescence secretome reinforces cell cycle exit, yet is largely detrimental to tissue homeostasis. Previous studies of secretomes rely on ELISA, bottom-up proteomics or RNA-seq. To date, no study to date has examined the proteoform complexity of secretomes to elucidate isoform-specific, post-translational modification or regulated cleavage of signal peptide. Therefore, we use a quantitative top-down proteomics approach to define the molecular complexity of secreted proteins <30 kDa. We identify multiple forms of immune regulators with known activities and affinities such as distinct forms of interleukin-8, as well as GRO alpha and HMGA1, and temporally resolve secreted proteoform dynamics. Together, our work demonstrates the complexity of the secretome past individual protein accessions and provides motivation for further proteoform-resolved measurements of the secretome.
C1 [Doubleday, Peter F.; Kelleher, Neil L.] Northwestern Univ, Prote Ctr Excellence, Dept Mol Biosci, Evanston, IL 60208 USA.
   [Fornelli, Luca] Univ Oklahoma, Dept Biol, Norman, OK 73019 USA.
RP Kelleher, NL (corresponding author), Northwestern Univ, Prote Ctr Excellence, Dept Mol Biosci, Evanston, IL 60208 USA.
EM n-kelleher@northwestern.edu
OI Doubleday, Peter/0000-0002-1784-1282
FU National Resource for Translational and Developmental Proteomics from
   the National Institute of General Medical Sciences [P41 GM108569];
   Sherman Fairchild Foundation; NSF FellowshipNational Science Foundation
   (NSF) [2015210477]
FX This research was carried out with the support from the National
   Resource for Translational and Developmental Proteomics under Grant P41
   GM108569 from the National Institute of General Medical Sciences (NLK)
   and supported by the Sherman Fairchild Foundation. PFD acknowledges the
   NSF Fellowship under award number 2015210477.
CR Acosta JC, 2008, CELL, V133, P1006, DOI 10.1016/j.cell.2008.03.038
   Acosta JC, 2013, NAT CELL BIOL, V15, P978, DOI 10.1038/ncb2784
   Baar MP, 2017, CELL, V169, P132, DOI 10.1016/j.cell.2017.02.031
   Baker DJ, 2011, NATURE, V479, P232, DOI 10.1038/nature10600
   Banks GC, 2000, BIOCHEMISTRY-US, V39, P8333, DOI 10.1021/bi000378+
   Chaturvedi V, 1999, J BIOL CHEM, V274, P23358, DOI 10.1074/jbc.274.33.23358
   Coppe JP, 2010, ANNU REV PATHOL-MECH, V5, P99, DOI 10.1146/annurev-pathol-121808-102144
   Coppe JP, 2008, PLOS BIOL, V6, P2853, DOI 10.1371/journal.pbio.0060301
   Das A, 2018, CELL, V173, P74, DOI 10.1016/j.cell.2018.02.008
   Davalos AR, 2013, J CELL BIOL, V201, P613, DOI 10.1083/jcb.201206006
   de Graaf EL, 2014, MOL CELL PROTEOMICS, V13, P2089, DOI 10.1074/mcp.M113.035436
   Debacq-Chainiaux F, 2009, NAT PROTOC, V4, P1798, DOI 10.1038/nprot.2009.191
   Dephoure N, 2011, METHODS, V54, P379, DOI 10.1016/j.ymeth.2011.03.008
   Diana F, 2001, J BIOL CHEM, V276, P11354, DOI 10.1074/jbc.M009521200
   Dorfer V, 2014, J PROTEOME RES, V13, P3679, DOI 10.1021/pr500202e
   Durbin KR, 2016, J PROTEOME RES, V15, P976, DOI 10.1021/acs.jproteome.5b00997
   Edberg DD, 2004, BIOCHEMISTRY-US, V43, P11500, DOI 10.1021/bi049833i
   Eichelbaum K, 2012, NAT BIOTECHNOL, V30, P984, DOI 10.1038/nbt.2356
   Elias JE, 2007, NAT METHODS, V4, P207, DOI 10.1038/nmeth1019
   Fellers RT, 2015, PROTEOMICS, V15, P1235, DOI [10.1002/pmic.201400313, 10.1002/pmic.201570050]
   Finkel T, 2011, J CELL BIOL, V194, P7, DOI 10.1083/jcb.201102095
   Fornelli L, 2018, J PROTEOMICS, V175, P3, DOI 10.1016/j.jprot.2017.02.002
   Gluck S, 2017, NAT CELL BIOL, V19, P1061, DOI 10.1038/ncb3586
   HEBERT CA, 1990, J IMMUNOL, V145, P3033
   Herranz N, 2015, NAT CELL BIOL, V17, P1205, DOI 10.1038/ncb3225
   Hirosue A, 2012, AGING CELL, V11, P553, DOI 10.1111/j.1474-9726.2012.00809.x
   Hoare M, 2016, NAT CELL BIOL, V18, P979, DOI 10.1038/ncb3397
   Karp NA, 2010, MOL CELL PROTEOMICS, V9, P1885, DOI 10.1074/mcp.M900628-MCP200
   Kuilman T, 2008, CELL, V133, P1019, DOI 10.1016/j.cell.2008.03.039
   LeDuc RD, 2019, MOL CELL PROTEOMICS, V18, P796, DOI 10.1074/mcp.RA118.000993
   MAY LT, 1991, CYTOKINE, V3, P204, DOI 10.1016/1043-4666(91)90018-9
   McAlister GC, 2014, ANAL CHEM, V86, P7150, DOI 10.1021/ac502040v
   Melani RD, 2016, MOL CELL PROTEOMICS, V15, P2423, DOI 10.1074/mcp.M115.056523
   Mustafa AK, 2009, SCI SIGNAL, V2, DOI 10.1126/scisignal.268re2
   Narita M, 2006, CELL, V126, P503, DOI 10.1016/j.cell.2006.05.052
   Nicholson CK, 2010, PHARMACOL RES, V62, P289, DOI 10.1016/j.phrs.2010.06.002
   Ntai I, 2016, METHODS MOL BIOL, V1410, P121, DOI 10.1007/978-1-4939-3524-6_8
   Ntai I, 2016, MOL CELL PROTEOMICS, V15, P45, DOI 10.1074/mcp.M114.047480
   Parry AJ, 2016, MAMM GENOME, V27, P320, DOI 10.1007/s00335-016-9628-9
   Patel PL, 2016, P NATL ACAD SCI USA, V113, pE5024, DOI 10.1073/pnas.1602379113
   Perez-Mancera PA, 2014, NAT REV CANCER, V14, P547, DOI 10.1038/nrc3773
   Pezze PD, 2014, PLOS COMPUT BIOL, V10, DOI 10.1371/journal.pcbi.1003728
   Rauniyar N, 2014, J PROTEOME RES, V13, P5293, DOI 10.1021/pr500880b
   Schmoker AM, 2019, BIOCHEM J, V476, P931, DOI 10.1042/BCJ20190022
   Sen N, 2012, MOL CELL, V45, P13, DOI 10.1016/j.molcel.2011.10.021
   Smith LM, 2013, NAT METHODS, V10, P186, DOI 10.1038/nmeth.2369
   Smith LK, 2015, NAT MED, V21, P932, DOI 10.1038/nm.3898
   Tepper CG, 2000, EXP CELL RES, V260, P9, DOI 10.1006/excr.2000.4990
   van Deursen JM, 2014, NATURE, V509, P439, DOI 10.1038/nature13193
   VANDAMME J, 1990, EUR J IMMUNOL, V20, P2113, DOI 10.1002/eji.1830200933
   VANDAMME J, 1989, EUR J BIOCHEM, V181, P337
   Vasile E, 2001, FASEB J, V15, P458, DOI 10.1096/fj.00-0051com
   Victorelli S, 2019, EMBO J, V38, DOI 10.15252/embj.2019101982
   Villen J, 2008, NAT PROTOC, V3, P1630, DOI 10.1038/nprot.2008.150
   Waldera-Lupa DM, 2014, AGING-US, V6, P856, DOI 10.18632/aging.100698
   WANG E, 1995, CANCER RES, V55, P2284
   Wuyts A, 1999, EUR J BIOCHEM, V260, P421, DOI 10.1046/j.1432-1327.1999.00166.x
   Yang H, 2017, P NATL ACAD SCI USA, V114, pE4612, DOI 10.1073/pnas.1705499114
   Zou Y, 2005, BIOCHEMISTRY-US, V44, P6293, DOI 10.1021/bi0475525
NR 59
TC 1
Z9 1
U1 0
U2 4
PU AMER CHEMICAL SOC
PI WASHINGTON
PA 1155 16TH ST, NW, WASHINGTON, DC 20036 USA
SN 1535-3893
EI 1535-3907
J9 J PROTEOME RES
JI J. Proteome Res.
PD FEB
PY 2020
VL 19
IS 2
BP 938
EP 948
DI 10.1021/acs.jproteome.9b00739
PG 11
WC Biochemical Research Methods
WE Science Citation Index Expanded (SCI-EXPANDED)
SC Biochemistry & Molecular Biology
GA KK9WO
UT WOS:000513085100033
PM 31940439
OA Green Accepted
DA 2022-04-10
ER

PT J
AU Scherschinski, L
   Prem, M
   Kremenetskaia, I
   Tinhofer, I
   Vajkoczy, P
   Karbe, AG
   Onken, JS
AF Scherschinski, Lea
   Prem, Markus
   Kremenetskaia, Irina
   Tinhofer, Ingeborg
   Vajkoczy, Peter
   Karbe, Anna-Gila
   Onken, Julia Sophie
TI Regulation of the Receptor Tyrosine Kinase AXL in Response to Therapy
   and Its Role in Therapy Resistance in Glioblastoma
SO INTERNATIONAL JOURNAL OF MOLECULAR SCIENCES
LA English
DT Article
DE RTK-AXL; tyrosine kinase inhibitor (TKI); R428; glioblastoma multiforme;
   radiation; temozolomide; post-translational receptor modification
ID GLIOMA-CELLS; GROWTH-ARREST; SURVIVAL; HYPOXIA; RADIOTHERAPY;
   TEMOZOLOMIDE; INHIBITION; APOPTOSIS; INVASION
AB The receptor tyrosine kinase AXL (RTK-AXL) is implicated in therapy resistance and tumor progression in glioblastoma multiforme (GBM). Here, we investigated therapy-induced receptor modifications and how endogenous RTK-AXL expression and RTK-AXL inhibition contribute to therapy resistance in GBM. GBM cell lines U118MG and SF126 were exposed to temozolomide (TMZ) and radiation (RTX). Receptor modifications in response to therapy were investigated on protein and mRNA levels. TMZ-resistant and RTK-AXL overexpressing cell lines were exposed to increasing doses of TMZ and RTX, with and without RTK-AXL tyrosine kinase inhibitor (TKI). Colorimetric microtiter (MTT) assay and colony formation assay (CFA) were used to assess cell viability. Results showed that the RTK-AXL shedding product, C-terminal AXL (CT-AXL), rises in response to repeated TMZ doses and under hypoxia, acts as a surrogate marker for radio-resistance. Endogenous RTX-AXL overexpression leads to therapy resistance, whereas combination therapy of TZM and RTX with TKI R428 significantly increases therapeutic effects. This data proves the role of RTK-AXL in acquired and intrinsic therapy resistance. By demonstrating that therapy resistance may be overcome by combining AXL TKI with standard treatments, we have provided a rationale for future study designs investigating AXL TKIs in GBM.
C1 [Scherschinski, Lea; Prem, Markus; Kremenetskaia, Irina; Vajkoczy, Peter; Karbe, Anna-Gila; Onken, Julia Sophie] Charite Univ Med Berlin, Dept Neurosurg, D-10117 Berlin, Germany.
   [Scherschinski, Lea; Prem, Markus; Kremenetskaia, Irina; Tinhofer, Ingeborg; Vajkoczy, Peter; Karbe, Anna-Gila; Onken, Julia Sophie] Humboldt Univ, Freie Univ Berlin, D-10117 Berlin, Germany.
   [Scherschinski, Lea; Prem, Markus; Kremenetskaia, Irina; Tinhofer, Ingeborg; Vajkoczy, Peter; Karbe, Anna-Gila; Onken, Julia Sophie] Berlin Inst Hlth, D-10117 Berlin, Germany.
   [Prem, Markus] Tech Univ Dresden, Dept Neurosurg, D-01069 Dresden, Germany.
   [Tinhofer, Ingeborg] Charite Univ Med Berlin, Dept Radiooncol & Radiotherapy, D-10117 Berlin, Germany.
   [Tinhofer, Ingeborg; Onken, Julia Sophie] German Canc Consortium, Deutsch Konsortium Translat Krebsforsch DKTK, Partner Site Berlin, D-10115 Berlin, Germany.
RP Onken, JS (corresponding author), Charite Univ Med Berlin, Dept Neurosurg, D-10117 Berlin, Germany.; Onken, JS (corresponding author), Humboldt Univ, Freie Univ Berlin, D-10117 Berlin, Germany.; Onken, JS (corresponding author), Berlin Inst Hlth, D-10117 Berlin, Germany.; Onken, JS (corresponding author), German Canc Consortium, Deutsch Konsortium Translat Krebsforsch DKTK, Partner Site Berlin, D-10115 Berlin, Germany.
EM Lea.Scherschinski@charite.de; Markus.Prem@uniklinikum-dresden.de;
   irina.kremenetskaia@charite.de; ingeborg.tinhofer@charite.de;
   peter.vajkoczy@charite.de; anna-gila.karbe@charite.de;
   julia.onken@charite.de
CR Aebersold DM, 2001, CANCER RES, V61, P2911
   Aguilera TA, 2016, NAT COMMUN, V7, DOI 10.1038/ncomms13898
   Cai BS, 2016, P NATL ACAD SCI USA, V113, P6526, DOI 10.1073/pnas.1524292113
   Cardone C, 2020, EUR J CANCER, V138, P1, DOI 10.1016/j.ejca.2020.07.010
   Chen FF, 2018, AM J CANCER RES, V8, P1466
   Cho CY, 2016, RNA, V22, P303, DOI 10.1261/rna.052571.115
   Colavito SA, 2020, J ONCOL, V2020, DOI 10.1155/2020/5291952
   Eskilsson E, 2018, NEURO-ONCOLOGY, V20, P743, DOI 10.1093/neuonc/nox191
   Flem-Karlsen K, 2020, PLOS ONE, V15, DOI 10.1371/journal.pone.0227187
   Grisanti S, 2019, J NEUROSURG SCI, V63, P458, DOI 10.23736/S0390-5616.16.03874-1
   Holstein E, 2018, INT J MOL SCI, V19, DOI 10.3390/ijms19124111
   Hong J, 2013, CANCER RES, V73, P331, DOI 10.1158/0008-5472.CAN-12-3151
   Horsman MR, 2016, J RADIAT RES, V57, pI90, DOI 10.1093/jrr/rrw007
   Hutterer M, 2008, CLIN CANCER RES, V14, P130, DOI 10.1158/1078-0432.CCR-07-0862
   Jensen R.L., 2006, NEUROSURG FOCUS, V20, pE24, DOI [DOI 10.3171/foc.2006.20.4.16, 10.3171/foc.2006.20.4.16, DOI 10.3171/FOC.2006.20.4.16]
   Kim YH, 2014, CANCER LETT, V354, P132, DOI 10.1016/j.canlet.2014.07.048
   Korshunov VA, 2012, CLIN SCI, V122, P361, DOI 10.1042/CS20110411
   Li Z, 2009, CANCER CELL, V15, P501, DOI 10.1016/j.ccr.2009.03.018
   Lombardi G, 2019, LANCET ONCOL, V20, P110, DOI 10.1016/S1470-2045(18)30675-2
   McDaniel NK, 2020, CLIN CANCER RES, V26, P4349, DOI 10.1158/1078-0432.CCR-19-3142
   Meyer AS, 2013, SCI SIGNAL, V6, DOI 10.1126/scisignal.2004155
   Miller MA, 2017, CLIN CANCER RES, V23, P623, DOI 10.1158/1078-0432.CCR-16-0869
   Miller MA, 2016, CANCER DISCOV, V6, P382, DOI 10.1158/2159-8290.CD-15-0933
   Myers SH, 2016, J MED CHEM, V59, P3593, DOI 10.1021/acs.jmedchem.5b01273
   Nakada M, 2020, ADV EXP MED BIOL, V1202, P151, DOI 10.1007/978-3-030-30651-9_8
   Onken J, 2017, ONCOTARGET, V8, P50403, DOI 10.18632/oncotarget.18468
   Onken J, 2016, ONCOTARGET, V7, P9876, DOI 10.18632/oncotarget.7130
   Roux Kenneth H, 2009, Cold Spring Harb Protoc, V2009, DOI 10.1101/pdb.ip66
   Scaltriti M, 2016, CLIN CANCER RES, V22, P1313, DOI 10.1158/1078-0432.CCR-15-1458
   Sinn B, 2010, MOL CANCER THER, V9, P480, DOI 10.1158/1535-7163.MCT-09-0498
   Stupp R, 2017, JAMA-J AM MED ASSOC, V318, P2306, DOI 10.1001/jama.2017.18718
   Stupp R, 2009, LANCET ONCOL, V10, P459, DOI 10.1016/S1470-2045(09)70025-7
   Sun YS, 2020, J NEURO-ONCOL, V150, P17, DOI 10.1007/s11060-020-03546-0
   Tanaka M, 2020, CANCERS, V12, DOI 10.3390/cancers12071850
   Vajkoczy P, 2006, P NATL ACAD SCI USA, V103, P5799, DOI 10.1073/pnas.0510923103
   van Tetering G, 2011, CURR MOL MED, V11, P255, DOI 10.2174/156652411795677972
   VARNUM BC, 1995, NATURE, V373, P623, DOI 10.1038/373623a0
   Vouri M, 2015, ONCOTARGET, V6, P16183, DOI 10.18632/oncotarget.3952
   Wang EF, 2014, PLOS ONE, V9, DOI 10.1371/journal.pone.0086102
   Wang JG, 1996, CANCER RES, V56, P154
   Zhang ZF, 2012, NAT GENET, V44, P852, DOI 10.1038/ng.2330
   Zhou L, 2016, ONCOGENE, V35, P2687, DOI 10.1038/onc.2015.343
NR 42
TC 0
Z9 0
U1 0
U2 0
PU MDPI
PI BASEL
PA ST ALBAN-ANLAGE 66, CH-4052 BASEL, SWITZERLAND
EI 1422-0067
J9 INT J MOL SCI
JI Int. J. Mol. Sci.
PD JAN
PY 2022
VL 23
IS 2
AR 982
DI 10.3390/ijms23020982
PG 13
WC Biochemistry & Molecular Biology; Chemistry, Multidisciplinary
WE Science Citation Index Expanded (SCI-EXPANDED)
SC Biochemistry & Molecular Biology; Chemistry
GA ZC2LW
UT WOS:000757359000001
PM 35055167
OA gold, Green Published
DA 2022-04-10
ER

PT J
AU Abou-Jaoude, W
   Ouattara, DA
   Kaufman, M
AF Abou-Jaoude, Wassim
   Ouattara, Djomangan A.
   Kaufman, Marcelle
TI From structure to dynamics: Frequency tuning in the p53-Mdm2 network I.
   Logical approach
SO JOURNAL OF THEORETICAL BIOLOGY
LA English
DT Article
DE p53; dna damage response; Feedback loops; Post-translational
   modifications; Network dynamics; Mathematical modelling
ID P53 TUMOR-SUPPRESSOR; dna damage; REGULATORY NETWORKS; FEEDBACK LOOP;
   CELL-DIFFERENTIATION; EXCISION-REPAIR; MDM-2 ONCOGENE; STEADY-STATES;
   TIME DELAYS; OSCILLATIONS
AB We investigate the dynamical properties of a simple four-variable model describing the interactions between the tumour suppressor protein p53, its main negative regulator Mdm2 and DNA damage, a model inspired by the work of Ciliberto et al. [2005. Steady states and oscillations in the p53/Mdm2 network. Cell Cycle 4(3), 488-493]. Its core consists of an antagonist circuit between p53 and nuclear Mdm2 embedded in a three-element negative circuit involving p53, cytoplasmic and nuclear Mdm2. A major concern has been to develop an integrated approach in which various types of descriptions complement each other. Here we present the logical analysis of our network and briefly discuss the corresponding differential model. Introducing the new notion of "logical bifurcation diagrams", we show that the essential qualitative dynamical properties Of Our network can be summarized by a small number of bifurcation scenarios, which can be understood in terms of the balance between the positive and negative circuits of the core network. The model displays a wide variety of behaviours depending on the level of damage, the efficiency of damage repair and, importantly, the DNA-binding affinity and transcriptional activity of p53, which are both stress- and cell-type specific. Our results qualitatively account for several experimental observations such as p53 pulses after irradiation, failure to respond to irradiation, shifts in the frequency of the oscillations, or rapid dampening of the oscillations in a cell population. They also suggest a great variability of behaviour from cell to cell and between different cell-types on the basis of different post-translational modification and transactivation properties of p53. Finally, our differential analysis provides an interpretation of the high and low frequency oscillations observed by Geva-Zatorsky et al. [2006. Oscillations and variability in the p53 system. Mol. Syst. Biol. 2, 2006.0033] depending on the irradiation dose. A more detailed analysis of our differential model as well as its stochastic analysis will be developed in a next paper. (c) 2009 Elsevier Ltd. All rights reserved.
C1 [Abou-Jaoude, Wassim; Ouattara, Djomangan A.; Kaufman, Marcelle] Univ Libre Bruxelles, Fac Sci, Unit Theoret & Computat Biol, B-1050 Brussels, Belgium.
RP Kaufman, M (corresponding author), Univ Libre Bruxelles, Fac Sci, Unit Theoret & Computat Biol, Campus Plaine CP 231, B-1050 Brussels, Belgium.
EM Marcelle.Kaufman@ulb.ac.be
OI OUATTARA, Djomangan Adama/0000-0002-9197-3267
CR Adimoolam S, 2003, DNA REPAIR, V2, P947, DOI 10.1016/S1568-7864(03)00087-9
   Appella E, 2001, EUR J BIOCHEM, V268, P2764, DOI 10.1046/j.1432-1327.2001.02225.x
   Bakkenist CJ, 2003, NATURE, V421, P499, DOI 10.1038/nature01368
   Bar-Or RL, 2000, P NATL ACAD SCI USA, V97, P11250, DOI 10.1073/pnas.210171597
   BARAK Y, 1993, EMBO J, V12, P461, DOI 10.1002/j.1460-2075.1993.tb05678.x
   Batchelor E, 2008, MOL CELL, V30, P277, DOI 10.1016/j.molcel.2008.03.016
   Bose I, 2007, J BIOSCIENCES, V32, P991, DOI 10.1007/s12038-007-0103-3
   Bottani S, 2007, J THEOR BIOL, V249, P235, DOI 10.1016/j.jtbi.2007.04.026
   Brooks CL, 2003, CURR OPIN CELL BIOL, V15, P164, DOI 10.1016/S0955-0674(03)00003-6
   Brooks CL, 2006, MOL CELL, V21, P307, DOI 10.1016/j.molcel.2006.01.020
   CHEN JD, 1995, MOL MED, V1, P142, DOI 10.1007/BF03401562
   Chene P, 2001, ONCOGENE, V20, P2611, DOI 10.1038/sj.onc.1204373
   Chickarmane V., 2005, ARXIVQBIO0510002
   Ciliberto A, 2005, CELL CYCLE, V4, P488, DOI 10.4161/cc.4.3.1548
   Coutts AS, 2007, EMBO REP, V8, P84, DOI 10.1038/sj.embor.7400855
   Faure A, 2006, BIOINFORMATICS, V22, pE124, DOI 10.1093/bioinformatics/btl210
   Feng ZH, 2007, CANCER RES, V67, P3043, DOI 10.1158/0008-5472.CAN-06-4149
   Freedman DA, 1999, CELL MOL LIFE SCI, V55, P96, DOI 10.1007/s000180050273
   FRIEDMAN PN, 1993, P NATL ACAD SCI USA, V90, P3319, DOI 10.1073/pnas.90.8.3319
   Gatz SA, 2006, CELL DEATH DIFFER, V13, P1003, DOI 10.1038/sj.cdd.4401903
   Geva-Zatorsky N, 2006, MOL SYST BIOL, V2, DOI 10.1038/msb4100068
   GLASS L, 1973, J THEOR BIOL, V39, P103, DOI 10.1016/0022-5193(73)90208-7
   Gonzalez AG, 2006, BIOSYSTEMS, V84, P91, DOI 10.1016/j.biosystems.2005.10.003
   Gottlieb TM, 2002, ONCOGENE, V21, P1299, DOI 10.1038/sj.onc.1205181
   Hamstra DA, 2006, CANCER RES, V66, P7482, DOI 10.1158/0008-5472.CAN-06-1405
   Haupt Y, 1997, NATURE, V387, P296, DOI 10.1038/387296a0
   Honda R, 2000, ONCOGENE, V19, P1473, DOI 10.1038/sj.onc.1203464
   Hu WW, 2007, CANCER RES, V67, P2757, DOI 10.1158/0008-5472.CAN-06-2656
   KAUFMAN M, 1985, J THEOR BIOL, V114, P527, DOI 10.1016/S0022-5193(85)80042-4
   Lahav G, 2004, NAT GENET, V36, P147, DOI 10.1038/ng1293
   Lozano G, 2000, NATURE, V404, P24, DOI 10.1038/35003670
   Ma L, 2005, P NATL ACAD SCI USA, V102, P14266, DOI 10.1073/pnas.0501352102
   Mayo LD, 2005, J BIOL CHEM, V280, P25953, DOI 10.1074/jbc.M503026200
   Mayo LD, 2002, TRENDS BIOCHEM SCI, V27, P462, DOI 10.1016/S0968-0004(02)02166-7
   McLure KG, 1998, EMBO J, V17, P3342, DOI 10.1093/emboj/17.12.3342
   Meek DW, 1998, CELL SIGNAL, V10, P159, DOI 10.1016/S0898-6568(97)00119-8
   MOMAND J, 1992, CELL, V69, P1237, DOI 10.1016/0092-8674(92)90644-R
   Monk NAM, 2003, CURR BIOL, V13, P1409, DOI 10.1016/S0960-9822(03)00494-9
   Naldi A, 2007, LECT NOTES COMPUT SC, V4695, P233
   Offer H, 1999, FEBS LETT, V450, P197, DOI 10.1016/S0014-5793(99)00505-0
   Ogunnaike BA, 2006, J R SOC INTERFACE, V3, P175, DOI 10.1098/rsif.2005.0077
   OLINER JD, 1993, NATURE, V362, P857, DOI 10.1038/362857a0
   Oren M, 2003, CELL DEATH DIFFER, V10, P431, DOI 10.1038/sj.cdd.4401183
   Oren M, 2002, BIOCHEM PHARMACOL, V64, P865, DOI 10.1016/S0006-2952(02)01149-8
   Puszynski K, 2008, J THEOR BIOL, V254, P452, DOI 10.1016/j.jtbi.2008.05.039
   Ramalingam S, 2007, CANCER RES, V67, P6247, DOI 10.1158/0008-5472.CAN-07-0342
   Remy E, 2008, ADV APPL MATH, V41, P335, DOI 10.1016/j.aam.2007.11.003
   Richard A, 2007, DISCRETE APPL MATH, V155, P2403, DOI 10.1016/j.dam.2007.04.019
   Siebert H, 2008, THEOR COMPUT SCI, V391, P258, DOI 10.1016/j.tcs.2007.11.010
   Siebert H, 2007, LECT NOTES COMPUT SC, V4695, P64
   Singh B, 2002, GENE DEV, V16, P984, DOI 10.1101/gad.973602
   SNOUSSI E, 1993, B MATH BIOL, V55, P973, DOI 10.1016/S0092-8240(05)80199-5
   Snoussi EH, 1989, DYNAMICS STABILITY S, V4, P189
   Stambolic V, 2001, MOL CELL, V8, P317, DOI 10.1016/S1097-2765(01)00323-9
   Stommel JM, 2005, CELL CYCLE, V4, P411, DOI 10.4161/cc.4.3.1522
   Stommel JM, 2004, EMBO J, V23, P1547, DOI 10.1038/sj.emboj.7600145
   THOMAS R, 1995, B MATH BIOL, V57, P247, DOI 10.1007/BF02460618
   THOMAS R, 1978, J THEOR BIOL, V73, P631, DOI 10.1016/0022-5193(78)90127-3
   THOMAS R, 1973, J THEOR BIOL, V42, P563, DOI 10.1016/0022-5193(73)90247-6
   THOMAS R, 1991, J THEOR BIOL, V153, P1, DOI 10.1016/S0022-5193(05)80350-9
   Thomas R, 2001, CHAOS, V11, P180, DOI 10.1063/1.1349893
   Thomas R, 2001, CHAOS, V11, P170, DOI 10.1063/1.1350439
   Thomas R, 1990, BIOL FEEDBACK
   THOMAS R, 1979, LECT NOTES BIOMATH, V29, P354
   Tiana G, 2002, EUR PHYS J B, V29, P135, DOI 10.1140/epjb/e2002-00271-1
   Vogelstein B, 2000, NATURE, V408, P307, DOI 10.1038/35042675
   Wagner J, 2005, IEE P SYST BIOL, V152, P109, DOI 10.1049/ip-syb:20050025
   Weinberg RL, 2004, J MOL BIOL, V341, P1145, DOI 10.1016/j.jmb.2004.06.071
   Xirodimas DP, 2004, CELL, V118, P83, DOI 10.1016/j.cell.2004.06.016
   Zhang TL, 2007, CELL CYCLE, V6, P85, DOI 10.4161/cc.6.1.3705
NR 70
TC 67
Z9 67
U1 0
U2 5
PU ACADEMIC PRESS LTD- ELSEVIER SCIENCE LTD
PI LONDON
PA 24-28 OVAL RD, LONDON NW1 7DX, ENGLAND
SN 0022-5193
EI 1095-8541
J9 J THEOR BIOL
JI J. Theor. Biol.
PD JUN 21
PY 2009
VL 258
IS 4
BP 561
EP 577
DI 10.1016/j.jtbi.2009.02.005
PG 17
WC Biology; Mathematical & Computational Biology
WE Science Citation Index Expanded (SCI-EXPANDED)
SC Life Sciences & Biomedicine - Other Topics; Mathematical & Computational
   Biology
GA 452WJ
UT WOS:000266571600008
PM 19233211
OA Green Submitted
DA 2022-04-10
ER

PT S
AU Nam, HJ
   Baek, SH
AF Nam, Hye Jin
   Baek, Sung Hee
BE Noh, DY
   Han, W
   Toi, M
TI Epigenetic Regulation in Breast Cancer
SO TRANSLATIONAL RESEARCH IN BREAST CANCER
SE Advances in Experimental Medicine and Biology
LA English
DT Article; Book Chapter
DE epigenetic; post-translational modification; Reptin; Pontin;
   RORa; LSD1; Epigenetic drug
ID CHROMATIN-REMODELING COMPLEX; HYPOXIA-INDUCIBLE FACTORS; ROR-ALPHA;
   METASTASIS SUPPRESSOR; TUMOR PROGRESSION; HDAC inhibitor; BET; FAMILY;
   DOMAIN; STABILIZATION
AB Aberrant epigenetic alteration has been associated with development of various cancers, including breast cancer. Since epigenetic modifications such as DNA methylation and histone modification are reversible, epigenetic enzymes, including histone modifying enzymes and DNA methyltransferases, emerge as attractive target for cancer therapy. Although epi-drugs targeting histone deacetylation or DNA methylation have received FDA approval for cancer therapy, a very modest anti-tumor activity has been observed with monotherapy in clinical studies of breast cancer. To improve efficacy of epi-drugs in breast cancer, combination of epi-drugs with other therapies currently has been investigated. Additionally, basic researches to elucidate molecular causes of cancer should be extensively and intensively conducted in order to find novel epigenetic druggable target. In this chapter, we summarize how epigenetic regulation affects the development of breast cancer and how to control cancer phenotype by modulating abnormal epigenetic modifications, and then suggest future research directions in epigenetic for breast cancer treatment.
C1 [Nam, Hye Jin] Korea Res Inst Chem Technol, Daejeon, South Korea.
   [Baek, Sung Hee] Seoul Natl Univ, Seoul, South Korea.
RP Baek, SH (corresponding author), Seoul Natl Univ, Seoul, South Korea.
EM sbaek@snu.ac.kr
CR Ahmed SU, 2009, PLOS ONE, V4, DOI 10.1371/journal.pone.0007305
   Asangani IA, 2014, NATURE, V510, P278, DOI 10.1038/nature13229
   Bauer A, 2000, EMBO J, V19, P6121, DOI 10.1093/emboj/19.22.6121
   Beckers T, 2007, INT J CANCER, V121, P1138, DOI 10.1002/ijc.22751
   Borges S, 2013, BREAST CANCER RES, V15, DOI 10.1186/bcr3460
   Bruick RK, 2001, SCIENCE, V294, P1337, DOI 10.1126/science.1066373
   Bruick RK, 2003, GENE DEV, V17, P2614, DOI 10.1101/gad.1145503
   Cao R, 2002, SCIENCE, V298, P1039, DOI 10.1126/science.1076997
   Cheng J, 2007, CELL, V131, P584, DOI 10.1016/j.cell.2007.08.045
   Choi HJ, 2010, BIOCHEM BIOPH RES CO, V400, P396, DOI 10.1016/j.bbrc.2010.08.084
   Cogswell PC, 2000, ONCOGENE, V19, P1123, DOI 10.1038/sj.onc.1203412
   Dawson MA, 2012, CELL, V150, P12, DOI 10.1016/j.cell.2012.06.013
   Dawson MA, 2011, NATURE, V478, P529, DOI 10.1038/nature10509
   Delmore JE, 2011, CELL, V146, P903, DOI 10.1016/j.cell.2011.08.017
   Derissen EJB, 2013, ONCOLOGIST, V18, P619, DOI 10.1634/theoncologist.2012-0465
   Duyndam MCA, 2003, J BIOL CHEM, V278, P6885, DOI 10.1074/jbc.M206320200
   Eales KL, 2016, ONCOGENESIS, V5, DOI 10.1038/oncsis.2015.50
   Epstein ACR, 2001, CELL, V107, P43, DOI 10.1016/S0092-8674(01)00507-4
   Esteller M, 2002, ONCOGENE, V21, P5427, DOI 10.1038/sj.onc.1205600
   Falahi F, 2014, BREAST CANCER RES, V16, DOI 10.1186/s13058-014-0412-z
   Filippakopoulos P, 2010, NATURE, V468, P1067, DOI 10.1038/nature09504
   Garcia PL, 2016, ONCOGENE, V35, P833, DOI 10.1038/onc.2015.126
   GIGUERE V, 1994, GENE DEV, V8, P538, DOI 10.1101/gad.8.5.538
   Giguere V, 1999, ENDOCR REV, V20, P689, DOI 10.1210/er.20.5.689
   Graeber TG, 1996, NATURE, V379, P88, DOI 10.1038/379088a0
   Hernadez-Munoz I, 2005, P NATL ACAD SCI USA, V102, P7635, DOI 10.1073/pnas.0408918102
   Huang LE, 1998, P NATL ACAD SCI USA, V95, P7987, DOI 10.1073/pnas.95.14.7987
   Jenuwein T, 2001, SCIENCE, V293, P1074, DOI 10.1126/science.1063127
   Jeong JW, 2002, CELL, V111, P709, DOI 10.1016/S0092-8674(02)01085-1
   Johnson DB, 2016, NAT COMMUN, V7, DOI 10.1038/ncomms10582
   Jones CA, 1998, MOL CELL BIOL, V18, P2825, DOI 10.1128/MCB.18.5.2825
   Jones PA, 2002, NAT REV GENET, V3, P415, DOI 10.1038/nrg816
   Kim B, 2011, BIOCHEM BIOPH RES CO, V415, P720, DOI 10.1016/j.bbrc.2011.10.154
   Kim H, 2011, MOL CELL, V44, P797, DOI 10.1016/j.molcel.2011.09.023
   Kim JH, 2005, NATURE, V434, P921, DOI 10.1038/nature03452
   Kim JH, 2007, P NATL ACAD SCI USA, V104, P20793, DOI 10.1073/pnas.0710343105
   Kim JH, 2006, NAT CELL BIOL, V8, P631, DOI 10.1038/ncb1415
   Kim K, 2017, SCI REP-UK, V7, DOI 10.1038/s41598-017-12344-0
   Kim YJ, 2013, ONCOGENE, V32, P2828, DOI 10.1038/onc.2013.32
   Kim Y, 2016, NAT COMMUN, V7, DOI 10.1038/ncomms10347
   Kleer CG, 2003, P NATL ACAD SCI USA, V100, P11606, DOI 10.1073/pnas.1933744100
   Kuzmichev A, 2004, MOL CELL, V14, P183, DOI 10.1016/S1097-2765(04)00185-6
   Kwon JE, 2006, J BIOL CHEM, V281, P12664, DOI 10.1074/jbc.M600204200
   Lee JS, 2011, P NATL ACAD SCI USA, V108, P13510, DOI 10.1073/pnas.1106106108
   Lee JS, 2010, MOL CELL, V39, P71, DOI 10.1016/j.molcel.2010.06.008
   Lee JM, 2012, MOL CELL, V48, P572, DOI 10.1016/j.molcel.2012.09.004
   Lee JM, 2010, MOL CELL, V37, P183, DOI 10.1016/j.molcel.2009.12.022
   Ley TJ, 2010, NEW ENGL J MED, V363, P2424, DOI 10.1056/NEJMoa1005143
   Maxwell PH, 1999, NATURE, V399, P271, DOI 10.1038/20459
   Mertz JA, 2011, P NATL ACAD SCI USA, V108, P16669, DOI 10.1073/pnas.1108190108
   Moretti RM, 2002, ONCOL REP, V9, P1139
   Nieto-Jimenez C, 2017, ONCOTARGET, V8, P19478, DOI 10.18632/oncotarget.14465
   O'Neil BH, 2007, ONCOLOGY-BASEL, V72, P97, DOI 10.1159/000111116
   Ocana A, 2017, ONCOTARGET, V8, P71285, DOI 10.18632/oncotarget.19744
   Ohh M, 2000, NAT CELL BIOL, V2, P423, DOI 10.1038/35017054
   OHNO H, 1990, CELL, V60, P991, DOI 10.1016/0092-8674(90)90347-H
   Olsen EA, 2007, J CLIN ONCOL, V25, P3109, DOI 10.1200/JCO.2006.10.2434
   Park PJ, 2009, NAT REV GENET, V10, P669, DOI 10.1038/nrg2641
   Pauken KE, 2016, SCIENCE, V354, P1160, DOI 10.1126/science.aaf2807
   Phadke PA, 2008, AM J PATHOL, V172, P809, DOI 10.2353/ajpath.2008.070772
   Piekarz RL, 2009, J CLIN ONCOL, V27, P5410, DOI 10.1200/JCO.2008.21.6150
   Radpour R, 2011, PLOS ONE, V6, DOI 10.1371/journal.pone.0027355
   Rankin EB, 2008, CELL DEATH DIFFER, V15, P678, DOI 10.1038/cdd.2008.21
   Semenza GL, 2002, TRENDS MOL MED, V8, pS62, DOI 10.1016/S1471-4914(02)02317-1
   Sen DR, 2016, SCIENCE, V354, P1165, DOI 10.1126/science.aae0491
   Seraj MJ, 2000, CANCER RES, V60, P2764
   Shen XT, 2000, NATURE, V406, P541, DOI 10.1038/35020123
   Shimamura T, 2013, CLIN CANCER RES, V19, P6183, DOI 10.1158/1078-0432.CCR-12-3904
   Stunnenberg HG, 2011, BIOESSAYS, V33, P547, DOI 10.1002/bies.201100044
   Thornburg NJ, 2003, CANCER RES, V63, P8293
   Tsai HC, 2012, CANCER CELL, V21, P430, DOI 10.1016/j.ccr.2011.12.029
   Varambally S, 2002, NATURE, V419, P624, DOI 10.1038/nature01075
   Venteicher AS, 2008, CELL, V132, P945, DOI 10.1016/j.cell.2008.01.019
   Wherry EJ, 2015, NAT REV IMMUNOL, V15, P486, DOI 10.1038/nri3862
   Zuber J, 2011, GENE DEV, V25, P1628, DOI 10.1101/gad.17269211
NR 75
TC 0
Z9 0
U1 3
U2 3
PU SPRINGER INTERNATIONAL PUBLISHING AG
PI CHAM
PA GEWERBESTRASSE 11, CHAM, CH-6330, SWITZERLAND
SN 0065-2598
EI 2214-8019
BN 978-981-32-9620-6; 978-981-32-9619-0
J9 ADV EXP MED BIOL
JI Adv.Exp.Med.Biol.
PY 2021
VL 1187
BP 103
EP 119
DI 10.1007/978-981-32-9620-6_5
D2 10.1007/978-981-32-9620-6
PG 17
WC Biology; Oncology; Medicine, Research & Experimental
WE Book Citation Index – Science (BKCI-S); Science Citation Index Expanded (SCI-EXPANDED)
SC Life Sciences & Biomedicine - Other Topics; Oncology; Research &
   Experimental Medicine
GA BS6WZ
UT WOS:000754424800005
PM 33983575
DA 2022-04-10
ER

PT J
AU Zoumpourlis, V
   Papassava, P
   Linardopoulos, S
   Gillespie, D
   Balmain, A
   Pintzas, A
AF Zoumpourlis, V
   Papassava, P
   Linardopoulos, S
   Gillespie, D
   Balmain, A
   Pintzas, A
TI High levels of phosphorylated c-Jun, Fra-1, Fra-2 and ATF-2 proteins
   correlate with malignant phenotypes in the multistage mouse skin
   carcinogenesis model
SO ONCOGENE
LA English
DT Article
DE jun; fos; ATF-2; mouse skin; AP-1; carcinogenesis
ID DNA-BINDING ACTIVITY; HA-RAS; CYCLIN D1; V-JUN; TRANSCRIPTIONAL
   ACTIVATION; CHEMICAL CARCINOGENESIS; CELLULAR-TRANSFORMATION;
   HETERODIMER FORMATION; ONCOGENE ACTIVATION; IN-VITRO
AB Analysis of the functions of AP-1 transcription factor in cellular systems has shown its key role as a mediator of oncogenic signals. The employment of suitable animal model systems greatly facilitates the study of changes in the composition and activity of the AP-1 complex. Here, we have analysed the quantitative and qualitative changes of AP-1 at different stages of carcinogenesis in mouse skin cell lines, derived from tumours induced by chemical mutagens. The findings of this study suggest that elevated AP-1 DNA binding and transactivation activity characterize the carcinoma cell lines, most notably the highly malignant spindle carcinomas. In addition, increased amounts and post-translational modification of c-Jun, Fra-1, Fra-2 and ATF-2 proteins account for a high percentage of the increased AP-1 activity. Remarkably, high levels of phosphorylated ATF-2 protein were detected in malignant cell lines, indicating a novel role of ATF-2 in tumour progression. c-Jun and ATF-2 proteins are phosphorylated by highly active JNK kinases present in tumour cells. Finally, our results indicate distinct functions for different AP-1 components in the promotion and progression of mouse skin tumours.
C1 Natl Hellen Res Fdn, Inst Biol Res & Biotechnol, GR-11635 Athens, Greece.
   Onyx Pharmaceut, Richmond, CA 94806 USA.
   CRC Beatson Labs, Glasgow G61 1BD, Lanark, Scotland.
   Univ Calif San Francisco, Ctr Canc, San Francisco, CA 94143 USA.
RP Pintzas, A (corresponding author), Natl Hellen Res Fdn, Inst Biol Res & Biotechnol, 48 Vas Constantinou Ave, GR-11635 Athens, Greece.
OI Linardopoulos, Spiros/0000-0002-6600-400X; Gillespie,
   David/0000-0002-6338-0544
CR ALBANESE C, 1995, J BIOL CHEM, V270, P23589, DOI 10.1074/jbc.270.40.23589
   ANGEL P, 1987, MOL CELL BIOL, V7, P2256, DOI 10.1128/MCB.7.6.2256
   BALMAIN A, 1988, ADV CANCER RES, V51, P147, DOI 10.1016/S0065-230X(08)60222-5
   BENBROOK DM, 1990, ONCOGENE, V5, P295
   BERGERS G, 1995, MOL CELL BIOL, V15, P3748
   BIANCHI AB, 1993, ONCOGENE, V8, P1127
   BINETRUY B, 1991, NATURE, V351, P122, DOI 10.1038/351122a0
   BLACK EJ, 1994, ONCOGENE, V9, P2363
   BOHMANN D, 1987, SCIENCE, V238, P1386, DOI 10.1126/science.2825349
   BOWDEN GT, 1994, CANCER RES, V54, pS1882
   BRADFORD MM, 1976, ANAL BIOCHEM, V72, P248, DOI 10.1016/0003-2697(76)90527-3
   BREMNER R, 1990, CELL, V61, P407, DOI 10.1016/0092-8674(90)90523-H
   BUCHMANN A, 1991, CANCER RES, V51, P4097
   BURLEY SK, 1994, CURR OPIN STRUC BIOL, V4, P3, DOI 10.1016/S0959-440X(94)90053-1
   BURNS PA, 1991, ONCOGENE, V6, P2363
   Campbell SL, 1998, ONCOGENE, V17, P1395, DOI 10.1038/sj.onc.1202174
   CHEN C, 1987, MOL CELL BIOL, V7, P2745, DOI 10.1128/MCB.7.8.2745
   CHIU R, 1989, CELL, V59, P979, DOI 10.1016/0092-8674(89)90754-X
   COHEN DR, 1988, MOL CELL BIOL, V8, P2063, DOI 10.1128/MCB.8.5.2063
   DERIJARD B, 1994, CELL, V76, P1025, DOI 10.1016/0092-8674(94)90380-8
   DOMANN FE, 1994, MOL CARCINOGEN, V9, P61, DOI 10.1002/mc.2940090202
   FERAMISCO JR, 1984, CELL, V38, P109, DOI 10.1016/0092-8674(84)90531-2
   FILMUS J, 1994, ONCOGENE, V9, P3627
   GARNER MM, 1981, NUCLEIC ACIDS RES, V9, P3047, DOI 10.1093/nar/9.13.3047
   GRUDA MC, 1994, ONCOGENE, V9, P2537
   HANKINS WD, 1981, CELL, V26, P91, DOI 10.1016/0092-8674(81)90036-2
   HIRAI SI, 1989, EMBO J, V8, P1433, DOI 10.1002/j.1460-2075.1989.tb03525.x
   HIRAKAWA T, 1988, P NATL ACAD SCI USA, V85, P1519, DOI 10.1073/pnas.85.5.1519
   Ihle JN, 1996, CELL, V84, P331, DOI 10.1016/S0092-8674(00)81277-5
   Johnson R, 1996, MOL CELL BIOL, V16, P4504
   Karin M, 1997, CURR OPIN CELL BIOL, V9, P240, DOI 10.1016/S0955-0674(97)80068-3
   Kawasaki H, 2000, NATURE, V405, P195, DOI 10.1038/35012097
   KEMP CJ, 1993, CELL, V74, P813, DOI 10.1016/0092-8674(93)90461-X
   Kustikova O, 1998, MOL CELL BIOL, V18, P7095, DOI 10.1128/MCB.18.12.7095
   Lallemand D, 1997, ONCOGENE, V14, P819, DOI 10.1038/sj.onc.1200901
   Lallemand D, 1998, EMBO J, V17, P5615, DOI 10.1093/emboj/17.19.5615
   LINARDOPOULOS S, 1995, CANCER RES, V55, P5168
   LIU JJ, 1995, MOL CELL BIOL, V15, P3654
   LLOYD A, 1991, NATURE, V352, P632, DOI 10.1038/352635a0
   Mechta F, 1997, ONCOGENE, V14, P837, DOI 10.1038/sj.onc.1200900
   Murakami M, 1997, ONCOGENE, V14, P2435, DOI 10.1038/sj.onc.1201077
   NISHINA H, 1990, P NATL ACAD SCI USA, V87, P3619, DOI 10.1073/pnas.87.9.3619
   OEHLER T, 1993, ONCOGENE, V8, P1141
   PFARR CM, 1994, CELL, V76, P747, DOI 10.1016/0092-8674(94)90513-4
   PULVERER BJ, 1991, NATURE, V353, P670, DOI 10.1038/353670a0
   QUINTANILLA M, 1991, CARCINOGENESIS, V12, P1875, DOI 10.1093/carcin/12.10.1875
   QUINTANILLA M, 1986, NATURE, V322, P78, DOI 10.1038/322078a0
   RYDER K, 1988, P NATL ACAD SCI USA, V85, P1487, DOI 10.1073/pnas.85.5.1487
   SAEZ E, 1995, CELL, V82, P721, DOI 10.1016/0092-8674(95)90469-7
   SCHUTTE J, 1989, P NATL ACAD SCI USA, V86, P2257, DOI 10.1073/pnas.86.7.2257
   SCHUTTE J, 1989, CELL, V59, P987, DOI 10.1016/0092-8674(89)90755-1
   SHERR CJ, 1993, CELL, V73, P1059, DOI 10.1016/0092-8674(93)90636-5
   SMEAL T, 1991, NATURE, V354, P494, DOI 10.1038/354494a0
   STOLER AB, 1993, J CELL BIOL, V122, P1103, DOI 10.1083/jcb.122.5.1103
   SUZUKI T, 1994, J VIROL, V68, P3527, DOI 10.1128/JVI.68.6.3527-3535.1994
   TREISMAN R, 1994, CURR OPIN GENET DEV, V4, P96, DOI 10.1016/0959-437X(94)90097-3
   van Dam H, 1998, GENE DEV, V12, P1227, DOI 10.1101/gad.12.8.1227
   VANDAM H, 1993, EMBO J, V12, P479, DOI 10.1002/j.1460-2075.1993.tb05680.x
   VANDAM H, 1995, EMBO J, V14, P1798, DOI 10.1002/j.1460-2075.1995.tb07168.x
   Vandel L, 1996, MOL CELL BIOL, V16, P1881
   WASYLYK C, 1988, EMBO J, V7, P2475, DOI 10.1002/j.1460-2075.1988.tb03094.x
   WESTWICK JK, 1994, P NATL ACAD SCI USA, V91, P6030, DOI 10.1073/pnas.91.13.6030
   YUSPA SH, 1988, ADV CANCER RES, V50, P25, DOI 10.1016/S0065-230X(08)60434-0
   ZERIAL M, 1989, EMBO J, V8, P805, DOI 10.1002/j.1460-2075.1989.tb03441.x
   Zhang L, 1997, SCIENCE, V276, P1268, DOI 10.1126/science.276.5316.1268
NR 65
TC 84
Z9 90
U1 0
U2 0
PU NATURE PUBLISHING GROUP
PI LONDON
PA MACMILLAN BUILDING, 4 CRINAN ST, LONDON N1 9XW, ENGLAND
SN 0950-9232
EI 1476-5594
J9 ONCOGENE
JI Oncogene
PD AUG 17
PY 2000
VL 19
IS 35
BP 4011
EP 4021
DI 10.1038/sj.onc.1203732
PG 11
WC Biochemistry & Molecular Biology; Oncology; Cell Biology; Genetics &
   Heredity
WE Science Citation Index Expanded (SCI-EXPANDED)
SC Biochemistry & Molecular Biology; Oncology; Cell Biology; Genetics &
   Heredity
GA 345PX
UT WOS:000088825300006
PM 10962557
OA Bronze
DA 2022-04-10
ER

PT J
AU Wattanathamsan, O
   Pongrakhananon, V
AF Wattanathamsan, Onsurang
   Pongrakhananon, Varisa
TI post-translational modification of tubulin: their role in cancers and
   the regulation of signaling molecules
SO CANCER GENE THERAPY
LA English
DT Review; Early Access
ID ALPHA-TUBULIN; MICROTUBULE DYNAMICS; TUMOR-GROWTH; MICROTENTACLE
   FORMATION; CELL-PROLIFERATION; prostate cancer; BETA-TUBULIN; HDAC6;
   ACETYLATION; TRAFFICKING
AB Microtubules play an important role in regulating several vital cellular activities, including cell division and tissue organization, through their dynamic protofilament network. In addition to forming the cytoskeleton, microtubules regulate the intracellular trafficking of cytoplasmic components and various signaling molecules, depending on the presence of post-transitional modifications (PTMs) and binding proteins. Accumulating evidence indicates the significant role of microtubule PTMs on cancer behavior. The PTMs that frequently occur on microtubules include acetylation, detyrosination, tyrosination, polyglutamylation, and polyglycylation. Alterations in these PTMs cause global effects on intracellular signal transduction, strongly linked to cancer pathogenesis. This review provides an update on the role of microtubule PTMs in cancer aggressiveness, particularly regarding cell death, sensitivity to chemotherapy, cell migration, and invasion. Additionally, it provides a mechanistic explanation of the molecular signaling pathway involved. This information might prove useful for predictive or therapeutic purposes.
C1 [Wattanathamsan, Onsurang; Pongrakhananon, Varisa] Chulalongkorn Univ, Preclin Tox & Efficacy Assessment Med & Chem Res, Bangkok, Thailand.
   [Wattanathamsan, Onsurang; Pongrakhananon, Varisa] Chulalongkorn Univ, Fac Pharmaceut Sci, Dept Physiol & Pharmacol, Bangkok, Thailand.
RP Pongrakhananon, V (corresponding author), Chulalongkorn Univ, Preclin Tox & Efficacy Assessment Med & Chem Res, Bangkok, Thailand.; Pongrakhananon, V (corresponding author), Chulalongkorn Univ, Fac Pharmaceut Sci, Dept Physiol & Pharmacol, Bangkok, Thailand.
EM varisa.p@pharm.chula.ac.th
FU National Research Council of Thailand (NRCT)National Research Council of
   Thailand (NRCT) [N41A640133]; Second Century Fund (C2F), Chulalongkorn
   University
FX This work was supported by the National Research Council of Thailand
   (NRCT; N41A640133 to VP) and the Second Century Fund (C2F to OW),
   Chulalongkorn University.
CR Akhmanova A, 2015, NAT REV MOL CELL BIO, V16, P711, DOI 10.1038/nrm4084
   Amin E, 2013, BIOL CHEM, V394, P1399, DOI 10.1515/hsz-2013-0181
   Aranson IS, 2005, PHYS REV E, V71, DOI 10.1103/PhysRevE.71.050901
   Arnold J, 2020, J EXP CLIN CANC RES, V39, DOI 10.1186/s13046-020-01712-w
   Asthana J, 2013, J BIOL CHEM, V288, P22516, DOI 10.1074/jbc.M113.489328
   Balzer EM, 2010, BREAST CANCER RES TR, V121, P65, DOI 10.1007/s10549-009-0457-3
   Banerjee A, 2002, BIOCHEM BIOPH RES CO, V293, P598, DOI 10.1016/S0006-291X(02)00269-3
   Barisic M, 2015, SCIENCE, V348, P799, DOI 10.1126/science.aaa5175
   Bodakuntla S, 2019, TRENDS CELL BIOL, V29, P804, DOI 10.1016/j.tcb.2019.07.004
   Boggs AE, 2015, CANCER RES, V75, P203, DOI 10.1158/0008-5472.CAN-13-3563
   Borys F, 2020, MOLECULES, V25, DOI 10.3390/molecules25163705
   Burbank KS, 2006, CURR BIOL, V16, pR516, DOI 10.1016/j.cub.2006.06.044
   Cang SD, 2014, EXP HEMATOL ONCOL, V3, DOI 10.1186/2162-3619-3-5
   Carbonaro M, 2012, J BIOL CHEM, V287, P11859, DOI 10.1074/jbc.M112.345587
   Castro-Castro A, 2012, EUR J CELL BIOL, V91, P950, DOI 10.1016/j.ejcb.2012.07.001
   Chakrabarti KR, 2015, ONCOTARGET, V6, P36292, DOI 10.18632/oncotarget.5345
   Chien JY, 2016, CELL DEATH DISCOV, V2, DOI 10.1038/cddiscovery.2016.6
   Di Bartolomeo S, 2010, J CELL BIOL, V191, P155, DOI 10.1083/jcb.201002100
   Eitaki M, 2012, BMC CANCER, V12, DOI 10.1186/1471-2407-12-469
   Ensign SPF, 2013, FRONT ONCOL, V3, DOI 10.3389/fonc.2013.00241
   Eshun-Wilson L, 2019, P NATL ACAD SCI USA, V116, P10366, DOI 10.1073/pnas.1900441116
   Etienne-Manneville S, 2013, ANNU REV CELL DEV BI, V29, P471, DOI 10.1146/annurev-cellbio-101011-155711
   Fife CM, 2014, BRIT J PHARMACOL, V171, P5507, DOI 10.1111/bph.12704
   Friedmann DR, 2012, P NATL ACAD SCI USA, V109, P19655, DOI 10.1073/pnas.1209357109
   Froidevaux-Klipfel L, 2015, ONCOTARGET, V6, P36063, DOI 10.18632/oncotarget.5373
   Gadadhar S, 2017, J CELL SCI, V130, P1347, DOI 10.1242/jcs.199471
   Gadau SD, 2018, NEUROSCI LETT, V687, P111, DOI 10.1016/j.neulet.2018.09.044
   Galigniana MD, 2004, J BIOL CHEM, V279, P22483, DOI 10.1074/jbc.M402223200
   Ganguly A, 2012, J BIOL CHEM, V287, P43359, DOI 10.1074/jbc.M112.423905
   Gao YS, 2010, J BIOL CHEM, V285, P11219, DOI 10.1074/jbc.M109.042754
   Geeraert C, 2010, J BIOL CHEM, V285, P24184, DOI 10.1074/jbc.M109.091553
   Giannakakou P, 2002, P NATL ACAD SCI USA, V99, P10855, DOI 10.1073/pnas.132275599
   Giustiniani J, 2009, CELL SIGNAL, V21, P529, DOI 10.1016/j.cellsig.2008.12.004
   Gradilone SA, 2013, CANCER RES, V73, P2259, DOI 10.1158/0008-5472.CAN-12-2938
   Heishi T, 2010, AM J PATHOL, V176, P1950, DOI 10.2353/ajpath.2010.090829
   Hosaka T, 2009, AM J PATHOL, V175, P430, DOI 10.2353/ajpath.2009.080788
   Hu JY, 2010, CELL MOL LIFE SCI, V67, P321, DOI 10.1007/s00018-009-0187-z
   Hubbert C, 2002, NATURE, V417, P455, DOI 10.1038/417455a
   Iida-Norita R, 2019, CANCER SCI, V110, P2296, DOI 10.1111/cas.14041
   Janke C, 2005, SCIENCE, V308, P1758, DOI 10.1126/science.1113010
   Janke C, 2014, J CELL BIOL, V206, P461, DOI 10.1083/jcb.201406055
   Janke C, 2011, NAT REV MOL CELL BIO, V12, P773, DOI 10.1038/nrm3227
   Jiang K, 2014, DEV CELL, V28, P295, DOI 10.1016/j.devcel.2014.01.001
   Jiang K, 2011, CURR OPIN CELL BIOL, V23, P94, DOI 10.1016/j.ceb.2010.08.008
   Jiang YY, 2016, ONCOGENE, V35, P4846, DOI 10.1038/onc.2016.17
   Jo H, 2014, CELL SIGNAL, V26, P1707, DOI 10.1016/j.cellsig.2014.04.007
   Karlsson R, 2009, BBA-REV CANCER, V1796, P91, DOI 10.1016/j.bbcan.2009.03.003
   Kevenaar JT, 2016, CURR BIOL, V26, P849, DOI 10.1016/j.cub.2016.01.048
   Kimura Y, 2010, J BIOL CHEM, V285, P22934, DOI 10.1074/jbc.C110.128280
   Kitahara S, 2014, MOL CANCER, V13, DOI 10.1186/1476-4598-13-99
   Ko P, 2021, INT J MOL SCI, V22, DOI 10.3390/ijms22116018
   Korolchuk VI, 2011, NAT CELL BIOL, V13, P453, DOI 10.1038/ncb2204
   Koyanagi T, 2021, CANCER MED-US, V10, P2732, DOI 10.1002/cam4.3841
   Koyanagi T, 2013, CANCER SCI, V104, P1705, DOI 10.1111/cas.12297
   Liang YJ, 2019, GENE, V684, P1, DOI 10.1016/j.gene.2018.10.042
   Liao SH, 2019, CELL RES, V29, P533, DOI 10.1038/s41422-019-0187-y
   Luduena Richard E., 2008, P123, DOI 10.1007/978-1-59745-336-3_6
   Mabjeesh NJ, 2003, CANCER CELL, V3, P363, DOI 10.1016/S1535-6108(03)00077-1
   Magiera MM, 2018, CELL, V173, P1323, DOI 10.1016/j.cell.2018.05.018
   Magiera MM, 2014, CURR BIOL, V24, pR351, DOI 10.1016/j.cub.2014.03.032
   Malik R, 2015, TRENDS BIOTECHNOL, V33, P230, DOI 10.1016/j.tibtech.2015.01.004
   Mariani M, 2015, GENE, V563, P109, DOI 10.1016/j.gene.2015.03.061
   Mialhe A, 2001, CANCER RES, V61, P5024
   Nagae S, 2013, GENES CELLS, V18, P387, DOI 10.1111/gtc.12044
   Nalbant P, 2009, MOL BIOL CELL, V20, P4070, DOI 10.1091/mbc.E09-01-0041
   Nieuwenhuis J, 2017, SCIENCE, V358, P1453, DOI 10.1126/science.aao5676
   Nogales E, 2001, ANNU REV BIOPH BIOM, V30, P397, DOI 10.1146/annurev.biophys.30.1.397
   North BJ, 2003, MOL CELL, V11, P437, DOI 10.1016/S1097-2765(03)00038-8
   Oba T, 2021, BREAST CANCER RES TR, V186, P37, DOI 10.1007/s10549-020-06033-2
   Oh S, 2017, BIOCHEM BIOPH RES CO, V482, P8, DOI 10.1016/j.bbrc.2016.11.039
   Ohashi A, 2015, PLOS ONE, V10, DOI 10.1371/journal.pone.0144675
   Owa M, 2021, COMMUN BIOL, V4, DOI 10.1038/s42003-021-01861-4
   Parker AL, 2014, FRONT ONCOL, V4, DOI 10.3389/fonc.2014.00153
   Pongrakhananon V, 2018, J CELL SCI, V131, DOI 10.1242/jcs.216168
   Portran D, 2017, NAT CELL BIOL, V19, P391, DOI 10.1038/ncb3481
   Pu YG, 2016, CANCER CELL INT, V16, DOI 10.1186/s12935-016-0340-3
   Rocha C, 2014, EMBO J, V33, P2247, DOI 10.15252/embj.201488466
   Rogowski K, 2009, CELL, V137, P1076, DOI 10.1016/j.cell.2009.05.020
   Saba NF, 2014, HEAD NECK PATHOL, V8, P66, DOI 10.1007/s12105-013-0476-6
   Sato Y, 2013, J BIOCHEM, V153, P5, DOI 10.1093/jb/mvs128
   Schappi JM, 2014, BBA-BIOMEMBRANES, V1838, P674, DOI 10.1016/j.bbamem.2013.08.026
   Sept D, 2007, CURR BIOL, V17, pR764, DOI 10.1016/j.cub.2007.07.002
   Sharma N, 2011, MOL BIOL CELL, V22, P806, DOI 10.1091/mbc.E10-03-0269
   Shieh AC, 2011, ANN BIOMED ENG, V39, P1379, DOI 10.1007/s10439-011-0252-2
   Song YY, 2013, NEURON, V78, P109, DOI 10.1016/j.neuron.2013.01.036
   Soucek K, 2006, PROSTATE, V66, P954, DOI 10.1002/pros.20416
   Stehbens S, 2012, J CELL BIOL, V198, P481, DOI 10.1083/jcb.201206050
   Stewart ZA, 2001, ONCOGENE, V20, P113, DOI 10.1038/sj.onc.1204060
   Takahashi Y, 2012, MOL CANCER RES, V10, P1135, DOI 10.1158/1541-7786.MCR-12-0098-T
   Tang K, 2020, BBA-MOL CELL RES, V1867, DOI 10.1016/j.bbamcr.2020.118676
   Tang N, 2020, CANCER CELL INT, V20, DOI 10.1186/s12935-020-01446-x
   Targa B, 2019, CELL DEATH DIS, V10, DOI 10.1038/s41419-019-1318-6
   Thazhath R, 2002, NAT CELL BIOL, V4, P256, DOI 10.1038/ncb764
   Torrino S, 2021, CELL METAB, V33, P1342, DOI 10.1016/j.cmet.2021.05.009
   Tu M, 2014, MOL MED REP, V10, P663, DOI 10.3892/mmr.2014.2317
   Valiron O, 2001, CELL MOL LIFE SCI, V58, P2069, DOI 10.1007/PL00000837
   van Dijk J, 2007, MOL CELL, V26, P437, DOI 10.1016/j.molcel.2007.04.012
   Vicente JJ, 2019, CURR OPIN CELL BIOL, V60, P36, DOI 10.1016/j.ceb.2019.03.017
   Wang G, 2012, PLOS ONE, V7, DOI 10.1371/journal.pone.0052095
   Wang N, 2019, NAT STRUCT MOL BIOL, V26, P571, DOI 10.1038/s41594-019-0241-y
   Wang ZH, 2016, CANCER LETT, V379, P134, DOI 10.1016/j.canlet.2016.06.001
   Wasylyk C, 2010, INT J CANCER, V127, P2542, DOI 10.1002/ijc.25261
   Wattanathamsan O, 2021, CELL DEATH DISCOV, V7, DOI 10.1038/s41420-021-00453-9
   Whipple RA, 2008, CANCER RES, V68, P5678, DOI 10.1158/0008-5472.CAN-07-6589
   Whipple RA, 2013, BREAST CANCER RES, V15, DOI 10.1186/bcr3477
   Wloga D, 2017, INT J MOL SCI, V18, DOI 10.3390/ijms18102207
   Wloga D, 2009, DEV CELL, V16, P867, DOI 10.1016/j.devcel.2009.04.008
   Yang SJ, 2020, INT J CLIN EXP PATHO, V13, P239
   Yao Q, 2017, ONCOTARGET, V8, P109632, DOI 10.18632/oncotarget.22759
   Yu I, 2015, J BIOL CHEM, V290, P17163, DOI 10.1074/jbc.R115.637447
   Zhang QC, 2012, ASIAN PAC J CANCER P, V13, P3471, DOI 10.7314/APJCP.2012.13.7.3471
   Zhou J, 2002, J BIOL CHEM, V277, P39777, DOI 10.1074/jbc.M203927200
NR 112
TC 0
Z9 0
U1 2
U2 2
PU SPRINGERNATURE
PI LONDON
PA CAMPUS, 4 CRINAN ST, LONDON, N1 9XW, ENGLAND
SN 0929-1903
EI 1476-5500
J9 CANCER GENE THER
JI Cancer Gene Ther.
DI 10.1038/s41417-021-00396-4
EA OCT 2021
PG 8
WC Biotechnology & Applied Microbiology; Oncology; Genetics & Heredity;
   Medicine, Research & Experimental
WE Science Citation Index Expanded (SCI-EXPANDED)
SC Biotechnology & Applied Microbiology; Oncology; Genetics & Heredity;
   Research & Experimental Medicine
GA WJ8GU
UT WOS:000709277800002
PM 34671113
DA 2022-04-10
ER

PT J
AU Herzer, K
   Weyer, S
   Krammer, PH
   Galle, PR
   Hofmann, TG
AF Herzer, K
   Weyer, S
   Krammer, PH
   Galle, PR
   Hofmann, TG
TI Hepatitis C virus core protein inhibits tumor suppressor protein
   promyelocytic leukemia function in human hepatoma cells
SO CANCER RESEARCH
LA English
DT Article
ID PML NUCLEAR-BODIES; ONCOGENIC RAS; HEPATOCELLULAR-CARCINOMA; PREMATURE
   SENESCENCE; P53 ACTIVITY; APOPTOSIS; INTERFERON; INDUCTION; INTERACT;
   ISOFORMS
AB Tumor suppressor protein promyelocytic leukemia (PML) is implicated in apoptosis regulation and antiviral response. PML localizes predominantly to PML-nuclear bodies (PML-NB), nuclear macromolecular complexes regulating tumor suppressor protein p53 activity. Consistent with the function of PML in the cellular antiviral response, PML-NBs represent preferential target in viral infections. In the case of hepatitis C virus (HCV) infection, important characteristics are non-responsiveness to IFN therapy and development of hepatocellular carcinoma. However, the mechanism which lead to the development of hepatocellular carcinoma are largely unknown. Here, we show that HCV core protein localizes to the cell nucleus in PML-NBs, where it colocalizes with p53. The HCV core interacts with endogenously expressed PML isoform IV (PML-IV), a key regulator of p53 activity. Importantly, we show that HCV core protein inhibits PML-IV-induced apoptosis and interferes with the coactivator function of PML-IV for proapoptotic p53 target genes including CD95 (Fas/APO-1). In particular, we found that the HCV core inhibits p53-mediated target gene expression by predominantly targeting the coactivator function of PML-IV because HCV core-mediated p53 target gene repression was absent in PML-ablated cells. HCV core expression abrogated both p53 serine 15 phosphorylation and lysine 382 acetylation, two p53-activating post-translational modification which were previously linked to an increased PML-NB formation. Taken together, our results suggest a potential mechanism for HCV-associated development of hepatocellular carcinoma through HCV core-mediated inactivation of the PML tumor suppressor pathway.
C1 Deutsch Krebsforschungszentrum, Div Immunogenet, D-69120 Heidelberg, Germany.
   Deutsch Krebsforschungszentrum, Res Grp Cellular Senescence, D-69120 Heidelberg, Germany.
   Univ Mainz, Dept Med 1, Heidelberg, Germany.
   Univ Heidelberg, Deutsch Zentrum Alternsforsch, Heidelberg, Germany.
RP Hofmann, TG (corresponding author), Deutsch Krebsforschungszentrum, Div Immunogenet, Neuenheimer Feld 242, D-69120 Heidelberg, Germany.
EM t.hofmann@dkfz.de
RI Galle, Peter/ABE-2872-2021
OI Galle, Peter/0000-0001-8294-0992
CR Bartenschlager R, 2003, ANTIVIR RES, V60, P91, DOI 10.1016/j.antiviral.2003.08.016
   Brummelkamp TR, 2002, SCIENCE, V296, P550, DOI 10.1126/science.1068999
   ChelbiAlix MK, 1995, LEUKEMIA, V9, P2027
   Contente A, 2002, NAT GENET, V30, P315, DOI 10.1038/ng836
   D'Orazi G, 2002, NAT CELL BIOL, V4, P11, DOI 10.1038/ncb714
   de Stanchina E, 2004, MOL CELL, V13, P523, DOI 10.1016/S1097-2765(04)00062-0
   Everett RD, 2001, ONCOGENE, V20, P7266, DOI 10.1038/sj.onc.1204759
   Ferbeyre G, 2000, GENE DEV, V14, P2015
   Ferbeyre G, 2002, MOL CELL BIOL, V22, P3497, DOI 10.1128/MCB.22.10.3497-3508.2002
   Fogal V, 2000, EMBO J, V19, P6185, DOI 10.1093/emboj/19.22.6185
   Guccione E, 2004, ONCOGENE, V23, P4662, DOI 10.1038/sj.onc.1207631
   Guo A, 2000, NAT CELL BIOL, V2, P730, DOI 10.1038/35036365
   Gurrieri C, 2004, JNCI-J NATL CANCER I, V96, P269, DOI 10.1093/jnci/djh043
   Herzer K, 2003, J VIROL, V77, P8299, DOI 10.1128/JVI.77.15.8299-8309.2003
   Hofmann TG, 2003, CELL DEATH DIFFER, V10, P1290, DOI 10.1038/sj.cdd.4401313
   Hofmann TG, 2002, NAT CELL BIOL, V4, P1, DOI 10.1038/ncb715
   Honda M, 2000, HEPATOLOGY, V31, P1351, DOI 10.1053/jhep.2000.7985
   Jensen K, 2001, ONCOGENE, V20, P7223, DOI 10.1038/sj.onc.1204765
   Kao CF, 2004, ONCOGENE, V23, P2472, DOI 10.1038/sj.onc.1207368
   Le XF, 1996, J BIOL CHEM, V271, P130, DOI 10.1074/jbc.271.1.130
   Liang TJ, 2004, GASTROENTEROLOGY, V127, pS62, DOI 10.1053/j.gastro.2004.09.017
   Moriya K, 1998, NAT MED, V4, P1065, DOI 10.1038/2053
   Muller M, 1998, J EXP MED, V188, P2033, DOI 10.1084/jem.188.11.2033
   NICOLETTI I, 1991, J IMMUNOL METHODS, V139, P271, DOI 10.1016/0022-1759(91)90198-O
   Otsuka M, 2000, J BIOL CHEM, V275, P34122, DOI 10.1074/jbc.M000578200
   Pearson M, 2000, NATURE, V406, P207, DOI 10.1038/35018127
   Poynard T, 2003, LANCET, V362, P2095, DOI 10.1016/S0140-6736(03)15109-4
   Ray RB, 1996, VIROLOGY, V226, P176, DOI 10.1006/viro.1996.0644
   Ray RB, 1996, J VIROL, V70, P4438, DOI 10.1128/JVI.70.7.4438-4443.1996
   Ray RB, 1997, J BIOL CHEM, V272, P10983
   Regad T, 2001, ONCOGENE, V20, P7274, DOI 10.1038/sj.onc.1204854
   Rosen HR, 1999, MOL MED TODAY, V5, P393, DOI 10.1016/S1357-4310(99)01523-3
   Salomoni P, 2002, CELL, V108, P165, DOI 10.1016/S0092-8674(02)00626-8
   Sternsdorf T, 1997, IMMUNOBIOLOGY, V198, P307, DOI 10.1016/S0171-2985(97)80051-4
   Takaoka A, 2003, NATURE, V424, P516, DOI 10.1038/nature01850
   Vogelstein B, 2000, NATURE, V408, P307, DOI 10.1038/35042675
   Wang ZG, 1998, NAT GENET, V20, P266, DOI 10.1038/3073
   Yang ST, 2002, NAT CELL BIOL, V4, P865, DOI 10.1038/ncb869
   Zhu J, 2002, NAT REV CANCER, V2, P705, DOI 10.1038/nrc887
NR 39
TC 45
Z9 46
U1 1
U2 2
PU AMER ASSOC CANCER RESEARCH
PI PHILADELPHIA
PA 615 CHESTNUT ST, 17TH FLOOR, PHILADELPHIA, PA 19106-4404 USA
SN 0008-5472
EI 1538-7445
J9 CANCER RES
JI Cancer Res.
PD DEC 1
PY 2005
VL 65
IS 23
BP 10830
EP 10837
DI 10.1158/0008-5472.CAN-05-0880
PG 8
WC Oncology
WE Science Citation Index Expanded (SCI-EXPANDED)
SC Oncology
GA 987HE
UT WOS:000233508200027
PM 16322229
DA 2022-04-10
ER

PT J
AU Arai, RJ
   Ogata, FT
   Batista, WL
   Masutani, H
   Yodoi, J
   Debbas, V
   Augusto, O
   Stern, A
   Monteiro, HP
AF Arai, Roberto J.
   Ogata, Fernando T.
   Batista, Wagner L.
   Masutani, Hiroshi
   Yodoi, Junji
   Debbas, Victor
   Augusto, Ohara
   Stern, Arnold
   Monteiro, Hugo P.
TI Thioredoxin-1 promotes survival in cells exposed to
   S-nitrosoglutathione: Correlation with reduction of intracellular levels
   of nitrosothiols and up-regulation of the ERK1/2 MAP Kinases
SO TOXICOLOGY AND APPLIED PHARMACOLOGY
LA English
DT Article
DE Thioredoxin; Nitrosothiol; Nitric oxide; Nitrotyrosine; p21Ras; ERK1/2
   MAP kinases
ID PROTEIN-TYROSINE PHOSPHORYLATION; COLON-CANCER CELLS; nf-kappa b;
   NITRIC-OXIDE; REDOX REGULATION; NITROSATIVE STRESS; ENDOTHELIAL-CELLS;
   INDUCED APOPTOSIS; gene expression; signal transduction
AB Accumulating evidence indicates that post-translational protein modifications by nitric oxide and its derived species are critical effectors of redox signaling in cells. These protein modifications are most likely controlled by intracellular reductants. Among them, the importance of the 12 kDa dithiol protein thioredoxin-1 (TRX-1) has been increasingly recognized. However, the effects of TRX-1 in cells exposed to exogenous nitrosothiols remain little understood. We investigated the levels of intracellular nitrosothiols and survival signaling in HeLa cells over-expressing TRX-1 and exposed to S-nitrosoglutahione (GSNO). A role for TRX-1 expression on GSNO catabolism and cell viability was demonstrated by the concentration-dependent effects of GSNO on decreasing TRX-1 expression, activation of capase-3, and increasing cell death. The over-expressaion of TRX-1 in HeLa cells partially attenuated caspase-3 activation and enhanced cell viability upon GSNO treatment. This was correlated with reduction of intracellular levels of nitrosothiols and increasing levels of nitrite and nitrotyrosine. The involvement of ERK, p38 and JNK pathway were investigated in parental cells treated with GSNO. Activation of ERK1/2 MAP kinases was shown to be critical for survival signaling. lit cells over-expressing TRX-1, basal phosphorylation levels of ERK1/2 MAP kinases were higher and further increased after GSNO treatment. These results indicate that the enhanced cell viability promoted by TRX-1 correlates with its capacity to regulate the levels of intracellular nitiosothiols and to up-regulate the survival signaling pathway mediated by the ERK1/2 MAP kinases.
C1 [Arai, Roberto J.; Ogata, Fernando T.; Batista, Wagner L.; Debbas, Victor; Monteiro, Hugo P.] Univ Fed Sao Paulo, Dept Biochem Mol Biol, CINTERGEN, Escola Paulista Med, BR-04044020 Sao Paulo, Brazil.
   [Masutani, Hiroshi; Yodoi, Junji] Kyoto Univ, Inst Virus Res, Dept Biol Responses, Kyoto 606, Japan.
   [Augusto, Ohara] Univ Sao Paulo, Inst Quim, Dept Bioquim, BR-01498 Sao Paulo, Brazil.
   [Stern, Arnold] NYU, Dept Pharmacol, New York, NY 10003 USA.
RP Arai, RJ (corresponding author), Univ Fed Sao Paulo, Dept Biochem Mol Biol, CINTERGEN, Escola Paulista Med, Rua 3 Maio 100,4 Andar, BR-04044020 Sao Paulo, Brazil.
EM arairj@yahoo.com.br; hpmonte@uol.com.br
RI Debbas, Victor/J-9475-2012; Monteiro, Hugo/C-8836-2012; Ogata, Fernando
   T/G-4366-2013; Masutani, Hiroshi/B-5114-2014; Batista, Wagner
   L./C-8204-2012; Augusto, Ohara/D-3839-2012
OI Ogata, Fernando T/0000-0002-1855-8358; Augusto,
   Ohara/0000-0002-7220-4286; Masutani, Hiroshi/0000-0001-7633-2827
FU Fundacao de Amparo a Pesquisa do Estado de S. Paulo (FAPESP)Fundacao de
   Amparo a Pesquisa do Estado de Sao Paulo (FAPESP) [00/12154-2,
   02/10192-0]; Conselho Nacional de Desenvolvimento Cientifico e
   Tecnologico (CNPq) Instituto do Milenio - RedoxomaConselho Nacional de
   Desenvolvimento Cientifico e Tecnologico (CNPQ) [420011/2005]
FX This work was supported by grants from Fundacao de Amparo a Pesquisa do
   Estado de S. Paulo (FAPESP) grant no. 00/12154-2 and 02/10192-0, and
   from Conselho Nacional de Desenvolvimento Cientifico e Tecnologico
   (CNPq) Instituto do Milenio - Redoxoma (Projeto no. 420011/2005).
CR Arai RJ, 2006, BIOCHEM BIOPH RES CO, V348, P1254, DOI 10.1016/j.bbrc.2006.07.178
   Aulak KS, 2004, AM J PHYSIOL-HEART C, V286, pH30, DOI 10.1152/ajpheart.00743.2003
   Bai J, 2003, J NEUROSCI, V23, P503, DOI 10.1523/JNEUROSCI.23-02-00503.2003
   Batista WL, 2007, FUNGAL GENET BIOL, V44, P347, DOI 10.1016/j.fgb.2006.11.002
   BECKMAN JS, 1990, P NATL ACAD SCI USA, V87, P1620, DOI 10.1073/pnas.87.4.1620
   Beer SM, 2004, J BIOL CHEM, V279, P47939, DOI 10.1074/jbc.M408011200
   Benhar M, 2005, NAT CELL BIOL, V7, P645, DOI 10.1038/ncb0705-645
   Benhar M, 2008, SCIENCE, V320, P1050, DOI 10.1126/science.1158265
   Bryan NS, 2004, P NATL ACAD SCI USA, V101, P4308, DOI 10.1073/pnas.0306706101
   Callsen D, 1999, BIOCHEMISTRY-US, V38, P2279, DOI 10.1021/bi982292a
   Dahm CC, 2006, J BIOL CHEM, V281, P10056, DOI 10.1074/jbc.M512203200
   Eu JP, 2000, BIOCHEMISTRY-US, V39, P1040, DOI 10.1021/bi992046e
   Feelisch M, 2002, FASEB J, V16, P1775, DOI 10.1096/fj.02-0363com
   Ferret PJ, 2000, BIOCHEM J, V346, P759, DOI 10.1042/0264-6021:3460759
   Gao JJ, 2005, P NATL ACAD SCI USA, V102, P17207, DOI 10.1073/pnas.0506893102
   Grune T, 1998, J BIOL CHEM, V273, P10857, DOI 10.1074/jbc.273.18.10857
   Haendeler J, 2002, NAT CELL BIOL, V4, P743, DOI 10.1038/ncb851
   Hansen JM, 2004, TOXICOL SCI, V82, P308, DOI 10.1093/toxsci/kfh231
   Hess DT, 2005, NAT REV MOL CELL BIO, V6, P150, DOI 10.1038/nrm1569
   Hirota K, 2002, ANN NY ACAD SCI, V957, P189, DOI 10.1111/j.1749-6632.2002.tb02916.x
   Hirota K, 1999, J BIOL CHEM, V274, P27891, DOI 10.1074/jbc.274.39.27891
   Hirota K, 1997, P NATL ACAD SCI USA, V94, P3633, DOI 10.1073/pnas.94.8.3633
   Hirst DG, 2007, FRONT BIOSCI-LANDMRK, V12, P3406, DOI 10.2741/2322
   Irie Y, 2003, P NATL ACAD SCI USA, V100, P5634, DOI 10.1073/pnas.1131756100
   Ischiropoulos H, 2003, BIOCHEM BIOPH RES CO, V305, P776, DOI 10.1016/S0006-291X(03)00814-3
   Ischiropoulos H, 1998, ARCH BIOCHEM BIOPHYS, V356, P1, DOI 10.1006/abbi.1998.0755
   Jaiswal AK, 2004, FREE RADICAL BIO MED, V36, P1199, DOI 10.1016/j.freeradbiomed.2004.02.074
   Jarry A, 2004, CANCER RES, V64, P4227, DOI 10.1158/0008-5472.CAN-04-0254
   Kahlos K, 2003, MOL CELL BIOCHEM, V254, P47, DOI 10.1023/A:1027380828645
   Kim PKM, 2001, INT IMMUNOPHARMACOL, V1, P1421, DOI 10.1016/S1567-5769(01)00088-1
   Kim SJ, 2005, CLIN CANCER RES, V11, P8425, DOI 10.1158/1078-0432.CCR-05-0449
   Kim YC, 2001, J BIOL CHEM, V276, P18399, DOI 10.1074/jbc.M100103200
   Kissner R, 1997, CHEM RES TOXICOL, V10, P1285, DOI 10.1021/tx970160x
   Lander HM, 1997, J BIOL CHEM, V272, P4323, DOI 10.1074/jbc.272.7.4323
   Lee JY, 2007, INT J ONCOL, V31, P685
   Livak KJ, 2001, METHODS, V25, P402, DOI 10.1006/meth.2001.1262
   MacMillan-Crow LA, 2000, ARCH BIOCHEM BIOPHYS, V377, P350, DOI 10.1006/abbi.2000.1799
   Marshall HE, 2002, J BIOL CHEM, V277, P34223, DOI 10.1074/jbc.M201638200
   Masumoto K, 1996, FEBS LETT, V398, P179, DOI 10.1016/S0014-5793(96)01237-9
   Masutani H, 1996, IMMUNOL LETT, V54, P67, DOI 10.1016/S0165-2478(96)02651-X
   Millet A, 2002, GASTROENTEROLOGY, V123, P235, DOI 10.1053/gast.2002.34310
   Mitchell DA, 2007, P NATL ACAD SCI USA, V104, P11609, DOI 10.1073/pnas.0704898104
   Mocellin S, 2007, MED RES REV, V27, P317, DOI 10.1002/med.20092
   Monteiro HP, 2002, FREE RADICAL BIO MED, V33, P765, DOI 10.1016/S0891-5849(02)00893-6
   Monteiro HP, 2005, METHOD ENZYMOL, V396, P350, DOI 10.1016/S0076-6879(05)96029-1
   Monteiro HP, 2008, ANTIOXID REDOX SIGN, V10, P843, DOI 10.1089/ars.2007.1853
   Nakamura H, 2001, P NATL ACAD SCI USA, V98, P15143, DOI 10.1073/pnas.191498798
   Nakamura H, 1997, ANNU REV IMMUNOL, V15, P351, DOI 10.1146/annurev.immunol.15.1.351
   Nikitovic D, 1998, BIOCHEM BIOPH RES CO, V242, P109, DOI 10.1006/bbrc.1997.7930
   Nikitovic D, 1996, J BIOL CHEM, V271, P19180, DOI 10.1074/jbc.271.32.19180
   OHSHIMA H, 2004, ARCH BIOCHEM BIOPHYS, V423, P12
   Oliveira CJR, 2003, FREE RADICAL BIO MED, V35, P381, DOI 10.1016/S0891-5849(03)00311-3
   Park HS, 2000, P NATL ACAD SCI USA, V97, P14382, DOI 10.1073/pnas.97.26.14382
   Pervin S, 2003, CANCER RES, V63, P8853
   Pesse B, 2005, J MOL CELL CARDIOL, V38, P765, DOI 10.1016/j.yjmcc.2005.02.020
   Pinzar E, 2005, FEBS LETT, V579, P5100, DOI 10.1016/j.febslet.2005.08.019
   Powis G, 2001, ANNU REV BIOPH BIOM, V30, P421, DOI 10.1146/annurev.biophys.30.1.421
   Radi R, 2001, FREE RADICAL BIO MED, V30, P463, DOI 10.1016/S0891-5849(00)00373-7
   Raffel J, 2003, J LAB CLIN MED, V142, P46, DOI 10.1016/S0022-2143(03)00068-4
   Souza JM, 2000, ARCH BIOCHEM BIOPHYS, V380, P360, DOI 10.1006/abbi.2000.1940
   Stoyanovsky DA, 2005, J AM CHEM SOC, V127, P15815, DOI 10.1021/ja0529135
   Sumbayev VV, 2005, ARCH BIOCHEM BIOPHYS, V436, P406, DOI 10.1016/j.abb.2005.02.021
   Tao L, 2004, P NATL ACAD SCI USA, V101, P11471, DOI 10.1073/pnas.0402941101
   Tao L, 2006, CIRCULATION, V114, P1395, DOI 10.1161/CIRCULATIONAHA.106.625061
   Tsujita M, 2008, BIOCHEM BIOPH RES CO, V369, P1001, DOI 10.1016/j.bbrc.2008.02.117
   Ueno M, 1999, J BIOL CHEM, V274, P35809, DOI 10.1074/jbc.274.50.35809
   Ullrich V, 2006, J INORG BIOCHEM, V100, P2079, DOI 10.1016/j.jinorgbio.2006.09.019
   Vojtek AB, 1998, J BIOL CHEM, V273, P19925, DOI 10.1074/jbc.273.32.19925
   Watson WH, 2004, TOXICOL SCI, V78, P3, DOI 10.1093/toxsci/kfh050
   Wink DA, 1997, J BIOL CHEM, V272, P11147
   YOKOMIZO A, 1995, CANCER RES, V55, P4293
   Zeng H, 2001, AM J PHYSIOL-HEART C, V281, pH432, DOI 10.1152/ajpheart.2001.281.1.H432
   Zhang JL, 1999, AM J PHYSIOL-LUNG C, V277, pL787, DOI 10.1152/ajplung.1999.277.4.L787
   Zhang YH, 2004, P NATL ACAD SCI USA, V101, P7891, DOI 10.1073/pnas.0401167101
NR 74
TC 26
Z9 27
U1 1
U2 3
PU ACADEMIC PRESS INC ELSEVIER SCIENCE
PI SAN DIEGO
PA 525 B ST, STE 1900, SAN DIEGO, CA 92101-4495 USA
SN 0041-008X
EI 1096-0333
J9 TOXICOL APPL PHARM
JI Toxicol. Appl. Pharmacol.
PD DEC 1
PY 2008
VL 233
IS 2
BP 227
EP 237
DI 10.1016/j.taap.2008.07.023
PG 11
WC Pharmacology & Pharmacy; Toxicology
WE Science Citation Index Expanded (SCI-EXPANDED)
SC Pharmacology & Pharmacy; Toxicology
GA 380PP
UT WOS:000261477900008
PM 18786557
DA 2022-04-10
ER

PT J
AU Gannon, NP
   Vaughan, RA
   Garcia-Smith, R
   Bisoffi, M
   Trujillo, KA
AF Gannon, Nicholas P.
   Vaughan, Roger A.
   Garcia-Smith, Randi
   Bisoffi, Marco
   Trujillo, Kristina A.
TI Effects of the exercise-inducible myokine irisin on malignant and
   non-malignant breast epithelial cell behavior in vitro
SO INTERNATIONAL JOURNAL OF CANCER
LA English
DT Article
DE FNDC5; doxorubicin; cell number; secretome; apoptosis
ID PHYSICAL-ACTIVITY; SURVIVAL; RISK; FAT
AB Exercise has been shown to reduce risk and improve prognosis of several types of cancers. Irisin is a myokine linked to exercise and lean body mass, which is thought to favorably alter metabolism systemically, potentially providing benefit for metabolic disease (including cancer). We evaluated the effects of various concentrations of irisin (with and without post-translational modification) on malignant and non-malignant breast epithelial cell number, migration and viability. Irisin significantly decreased cell number, migration and viability in malignant MDA-MB-231 cells, without affecting non-malignant MCF-10a cells. Moreover, irisin enhanced the cytotoxic effect of doxorubicin (Dox) when added to a wide spectrum of irisin concentrations in the malignant cell type (with simultaneous reduction in Dox uptake), which was not observed in non-malignant MCF-10a cells. Additionally, we found that irisin decreases malignant cell viability in part through stimulation of caspase activity leading to apoptotic death. Interestingly, we found that irisin suppresses NFB activation, an opposite effect of other myokines such as tumor necrosis factor alpha (TNF-). Our observations suggest that irisin may offer therapeutic benefits for breast cancer prevention and treatment possibly through an anti-inflammatory response, induction of apoptotic cell death, or through enhanced tumor sensitivity to common antineoplastic agents such as Dox.
   What's new? A relatively little known myokine, irisin, might be a missing link between exercise and its protective effect on breast cancer. Researchers from the University of New Mexico treated several breast cancer cell lines with the myokine and observed decreased viability, proliferation and migration. These findings were linked to proapoptotic and anti-inflammatory effects involving the transcription factor NF-B. The authors point to potential therapeutic benefits as irisin did not affect growth or survival of non-malignant cells and synergized with doxorubicin, currently widely used in breast cancer chemotherapy.
C1 [Gannon, Nicholas P.; Vaughan, Roger A.; Garcia-Smith, Randi; Bisoffi, Marco; Trujillo, Kristina A.] Univ New Mexico, Dept Biochem & Mol Biol, Hlth Sci Ctr, Sch Med, Albuquerque, NM 87131 USA.
   [Vaughan, Roger A.] Univ New Mexico, Dept Hlth Exercise & Sports Sci, Albuquerque, NM 87131 USA.
   [Vaughan, Roger A.] Univ New Mexico, Dept Individual Family & Community Educ Nutr, Albuquerque, NM 87131 USA.
   [Bisoffi, Marco; Trujillo, Kristina A.] Univ New Mexico, Ctr Canc, Albuquerque, NM 87131 USA.
   [Bisoffi, Marco] Chapman Univ, Orange, CA USA.
RP Trujillo, KA (corresponding author), Univ New Mexico, Dept Biochem & Mol Biol, Hlth Sci Ctr, 1 Univ Blvd, Albuquerque, NM 87131 USA.
EM ktrujillo@salud.unm.edu
OI Gannon, Nicholas/0000-0003-1625-1675
FU New Mexico IDeA Network for Biomedical Research Excellence (INBRE)
FX Grant sponsor: New Mexico IDeA Network for Biomedical Research
   Excellence (INBRE)
CR Bostrom P, 2012, NATURE, V481, P463, DOI 10.1038/nature10777
   Chen XL, 2011, CANCER PREV RES, V4, P1409, DOI 10.1158/1940-6207.CAPR-10-0355
   Friedenreich CM, 2002, J NUTR, V132, p3456S, DOI 10.1093/jn/132.11.3456S
   Hanahan D, 2011, CELL, V144, P646, DOI 10.1016/j.cell.2011.02.013
   Hofmann T, 2014, FRONT ENDOCRINOL, V5, DOI 10.3389/fendo.2013.00202
   Hojman P, 2011, AM J PHYSIOL-ENDOC M, V301, pE504, DOI 10.1152/ajpendo.00520.2010
   Holick CN, 2008, CANCER EPIDEM BIOMAR, V17, P379, DOI 10.1158/1055-9965.EPI-07-0771
   Holmes MD, 2005, JAMA-J AM MED ASSOC, V293, P2479, DOI 10.1001/jama.293.20.2479
   Huh JY, 2014, INT J OBESITY, V38, P1538, DOI 10.1038/ijo.2014.42
   LaMonte MJ, 2005, J APPL PHYSIOL, V99, P1205, DOI 10.1152/japplphysiol.00193.2005
   Lee P, 2014, CELL METAB, V19, P302, DOI 10.1016/j.cmet.2013.12.017
   Liu JJ, 2014, J DIABETES COMPLICAT, V28, P208, DOI 10.1016/j.jdiacomp.2013.09.011
   Loprinzi PD, 2012, ONCOL NURS FORUM, V39, P269, DOI 10.1188/12.ONF.269-274
   Madeleine MM, 2011, BREAST CANCER RES TR, V129, P887, DOI 10.1007/s10549-011-1520-4
   Moon HS, 2014, METABOLISM, V63, P188, DOI 10.1016/j.metabol.2013.10.005
   Sansone P, 2007, J CLIN INVEST, V117, P3988, DOI 10.1172/JCI32533
   Scharhag-Rosenberger F, 2014, MED SCI SPORT EXER, V46, P1736, DOI 10.1249/MSS.0000000000000286
   Vaughan RA, 2014, DIABETES OBES METAB, V16, P711, DOI 10.1111/dom.12268
   Vaughan RA, 2013, INT J CANCER, V133, P2504, DOI 10.1002/ijc.28264
   Warren TY, 2010, MED SCI SPORT EXER, V42, P879, DOI 10.1249/MSS.0b013e3181c3aa7e
   Wen MS, 2013, PLOS ONE, V8, DOI 10.1371/journal.pone.0064025
   Wu GS, 2013, PHARMACOL REP, V65, P453, DOI 10.1016/S1734-1140(13)71021-1
   Zhang Y, 2014, DIABETES, V63, P514, DOI 10.2337/db13-1106
NR 23
TC 90
Z9 94
U1 0
U2 24
PU WILEY
PI HOBOKEN
PA 111 RIVER ST, HOBOKEN 07030-5774, NJ USA
SN 0020-7136
EI 1097-0215
J9 INT J CANCER
JI Int. J. Cancer
PD FEB 15
PY 2015
VL 136
IS 4
BP E197
EP E202
DI 10.1002/ijc.29142
PG 6
WC Oncology
WE Science Citation Index Expanded (SCI-EXPANDED)
SC Oncology
GA AW2AG
UT WOS:000346089900019
PM 25124080
OA Bronze
DA 2022-04-10
ER

PT J
AU Caria, S
   Stewart, BZ
   Jin, RT
   Smith, BJ
   Humbert, PO
   Kvansakul, M
AF Caria, Sofia
   Stewart, Bryce Z.
   Jin, Ruitao
   Smith, Brian J.
   Humbert, Patrick O.
   Kvansakul, Marc
TI Structural analysis of phosphorylation-associated interactions of human
   MCC with Scribble PDZ domains
SO FEBS JOURNAL
LA English
DT Article
DE cell polarity; MCC; PDZ domain; phosphorylation; scribble; X-ray
   crystallography
ID CELL POLARITY; PROTEIN; BINDING; REVEALS; GROMACS; SYSTEM; PSD-95;
   CANCER
AB Scribble is a crucial adaptor protein that plays a pivotal role during establishment and control of cell polarity, impacting many physiological processes ranging from cell migration to immunity and organization of tissue architecture. Scribble harbours a leucine-rich repeat domain and four PDZ domains that mediate most of Scribble's interactions with other proteins. It has become increasingly clear that post-translational modification substantially impact Scribble-ligand interactions, with phosphorylation being a major modulator of binding to Scribble. To better understand how Scribble PDZ domains direct cell polarity signalling and how phosphorylation impacts this process, we investigated human Scribble interactions with MCC (Mutated in Colorectal Cancer). We systematically evaluated the ability of all four individual Scribble PDZ domains to bind the PDZ-binding motif (PBM) of MCC as well as MCC phosphorylated at the -1 Ser position. We show that Scribble PDZ1 and PDZ3 are the major interactors with MCC, and that modifications to Ser at the -1 position in the MCC PBM only has a minor effect on binding to Scribble PDZ domains. We then examined the structural basis for these observations by determining the crystal structures of Scribble PDZ1 domain bound to both the unphosphorylated MCC PBM as well as phosphorylated MCC. Our structures indicated that phospho-Ser at the -1 position in MCC is not involved in major contacts with Scribble PDZ1, and in conjunction with our affinity measurements suggest that the impact of phosphorylation at the -1 position of MCC must extend beyond a simple modulation of the affinity for Scribble PDZ domains.
C1 [Caria, Sofia; Stewart, Bryce Z.; Humbert, Patrick O.; Kvansakul, Marc] La Trobe Univ, La Trobe Inst Mol Sci, Dept Biochem & Genet, Melbourne, Vic, Australia.
   [Caria, Sofia] Australian Synchrotron, SAXS WAXS, Clayton, Vic, Australia.
   [Jin, Ruitao; Smith, Brian J.] La Trobe Univ, La Trobe Inst Mol Sci, Dept Chem & Phys, Melbourne, Vic, Australia.
   [Humbert, Patrick O.; Kvansakul, Marc] La Trobe Univ, Res Ctr Mol Canc Prevent, Melbourne, Vic, Australia.
   [Humbert, Patrick O.] Univ Melbourne, Dept Biochem & Mol Biol, Melbourne, Vic, Australia.
   [Humbert, Patrick O.] Univ Melbourne, Dept Clin Pathol, Melbourne, Vic, Australia.
   [Caria, Sofia] 114 Innovat Dr,Milton Pk, Abingdon OX14 4RZ, Oxon, England.
RP Humbert, PO; Kvansakul, M (corresponding author), La Trobe Univ, Dept Biochem & Genet, Melbourne, Vic 3086, Australia.
EM p.humbert@latrobe.edu.au; m.kvansakul@latrobe.edu.au
RI Kvansakul, Marc/AAF-2453-2019; Humbert, Patrick O/L-4264-2016; Smith,
   Brian J/F-8282-2011
OI Kvansakul, Marc/0000-0003-2639-2498; Humbert, Patrick
   O/0000-0002-1366-6691; Smith, Brian J/0000-0003-0498-1910; Caria,
   Sofia/0000-0001-7289-2093; Jin, Ruitao/0000-0002-7934-250X
FU National Health and Medical Research Council AustraliaNational Health
   and Medical Research Council (NHMRC) of Australia [APP1103871,
   APP1079133]; Australian Research CouncilAustralian Research Council
   [FT130101349]; La Trobe University; Australian Research Training
   Scholarships; Australian GovernmentAustralian GovernmentCGIAR; Intersect
   Australia Ltd; HPC-GPGPU Facility [LE170100200]
FX We thank staff at the MX beamlines, in particular Tom Caradoc-Davis, at
   the Australian Synchrotron for help with X-ray data collection, and the
   CSIRO C3 Collaborative Crystallization Centre for assistance with
   crystallization and the Comprehensive Proteomics Platform at La Trobe
   University for core instrument support. We thank the ACRF for their
   support of the Eiger MX detector at the Australian Synchrotron MX2
   beamline. This work was supported in whole or part by the National
   Health and Medical Research Council Australia (Project Grant APP1103871
   to MK, POH; Senior Research Fellowship APP1079133 to POH), Australian
   Research Council (Fellowship FT130101349 to MK) and La Trobe University
   (Research focus area "Understanding Disease" project grant and
   Scholarship to BZS). RJ acknowledges receipt of Australian Research
   Training Scholarships. Part of this work was undertaken using resources
   from the National Computational Infrastructure, which is supported by
   the Australian Government and provided through Intersect Australia Ltd,
   and through the HPC-GPGPU Facility, which was established with the
   assistance of LIEF Grant LE170100200.
CR Adams PD, 2010, ACTA CRYSTALLOGR D, V66, P213, DOI 10.1107/S0907444909052925
   Appleton BA, 2006, J BIOL CHEM, V281, P22312, DOI 10.1074/jbc.M602901200
   Arnaud C, 2009, FEBS LETT, V583, P2326, DOI 10.1016/j.febslet.2009.06.034
   Bakan A, 2011, BIOINFORMATICS, V27, P1575, DOI 10.1093/bioinformatics/btr168
   Bilder D, 2000, SCIENCE, V289, P113, DOI 10.1126/science.289.5476.113
   Bouwmeester T, 2004, NAT CELL BIOL, V6, P97, DOI 10.1038/ncb1086
   Caria S, 2018, J BIOL CHEM, V293, P4519, DOI 10.1074/jbc.M117.817528
   Chen VB, 2010, ACTA CRYSTALLOGR D, V66, P12, DOI 10.1107/S0907444909042073
   Chetkovich DM, 2002, J NEUROSCI, V22, P5791
   Clairfeuille T, 2016, NAT STRUCT MOL BIOL, V23, P921, DOI 10.1038/nsmb.3290
   Cohen NA, 1996, NEURON, V17, P759, DOI 10.1016/S0896-6273(00)80207-X
   Elsum IA, 2014, ONCOGENE, V33, P5523, DOI 10.1038/onc.2013.498
   Emsley P, 2004, ACTA CRYSTALLOGR D, V60, P2126, DOI 10.1107/S0907444904019158
   ESSMANN U, 1995, J CHEM PHYS, V103, P8577, DOI 10.1063/1.470117
   Fukuyama R, 2008, ONCOGENE, V27, P6044, DOI 10.1038/onc.2008.204
   Godde NJ, 2014, PLOS GENET, V10, DOI 10.1371/journal.pgen.1004323
   Halaoui R, 2015, ONCOGENE, V34, P939, DOI 10.1038/onc.2014.59
   Hess B, 1997, J COMPUT CHEM, V18, P1463, DOI 10.1002/(SICI)1096-987X(199709)18:12<1463::AID-JCC4>3.0.CO;2-H
   Holm L, 2016, NUCLEIC ACIDS RES, V44, pW351, DOI 10.1093/nar/gkw357
   How JY, 2019, FEBS LETT, V593, P533, DOI 10.1002/1873-3468.13329
   Huang J, 2017, NAT METHODS, V14, P71, DOI [10.1038/NMETH.4067, 10.1038/nmeth.4067]
   Ivarsson Y, 2014, P NATL ACAD SCI USA, V111, P2542, DOI 10.1073/pnas.1312296111
   Kabsch W, 2010, ACTA CRYSTALLOGR D, V66, P125, DOI 10.1107/S0907444909047337
   Kallay LM, 2006, J CELL BIOCHEM, V99, P647, DOI 10.1002/jcb.20992
   Lee J, 2016, J CHEM THEORY COMPUT, V12, P405, DOI 10.1021/acs.jctc.5b00935
   Lim KYB, 2017, J BIOL CHEM, V292, P20425, DOI 10.1074/jbc.M117.799452
   Liu X, 2013, STRUCTURE, V21, P342, DOI 10.1016/j.str.2013.01.004
   Matsumine A, 1996, J BIOL CHEM, V271, P10341, DOI 10.1074/jbc.271.17.10341
   McCaffrey LM, 2012, COLD SPRING HARB PER, V4, P1
   Meyer PA, 2016, NAT COMMUN, V7, DOI 10.1038/ncomms10882
   Morin A, 2013, ELIFE, V2, DOI 10.7554/eLife.01456
   Nelson WJ, 2003, NATURE, V422, P766, DOI 10.1038/nature01602
   Pangon L, 2012, BBA-MOL CELL RES, V1823, P1058, DOI 10.1016/j.bbamcr.2012.03.011
   Pearson HB, 2015, MOL CANCER, V14, DOI 10.1186/s12943-015-0440-z
   Pearson HB, 2011, J CLIN INVEST, V121, P4257, DOI 10.1172/JCI58509
   Pettersen EF, 2004, J COMPUT CHEM, V25, P1605, DOI 10.1002/jcc.20084
   Rautureau GJP, 2012, CELL DEATH DIS, V3, DOI 10.1038/cddis.2012.178
   Ren JQ, 2015, BIOCHEM J, V468, P133, DOI 10.1042/BJ20141473
   SALI A, 1993, J MOL BIOL, V234, P779, DOI 10.1006/jmbi.1993.1626
   SCOPES RK, 1974, ANAL BIOCHEM, V59, P277, DOI 10.1016/0003-2697(74)90034-7
   Slep KC, 2012, PLOS ONE, V7, DOI 10.1371/journal.pone.0050097
   Stephens R, 2018, J MOL BIOL, V430, P3585, DOI 10.1016/j.jmb.2018.01.011
   Storoni LC, 2004, ACTA CRYSTALLOGR D, V60, P432, DOI 10.1107/S0907444903028956
   Studier FW, 2005, PROTEIN EXPRES PURIF, V41, P207, DOI 10.1016/j.pep.2005.01.016
   Sundell GN, 2018, MOL SYST BIOL, V14, DOI 10.15252/msb.20178129
   Sundell GN, 2018, BIOCHEMISTRY-US, V57, P66, DOI 10.1021/acs.biochem.7b00965
   Van der Spoel D, 2005, J COMPUT CHEM, V26, P1701, DOI 10.1002/jcc.20291
   Winn MD, 2011, ACTA CRYSTALLOGR D, V67, P235, DOI 10.1107/S0907444910045749
   Winter G, 2010, J APPL CRYSTALLOGR, V43, P186, DOI 10.1107/S0021889809045701
   Young T, 2014, DEVELOPMENT, V141, P3505, DOI 10.1242/dev.114033
   Zhan LX, 2008, CELL, V135, P865, DOI 10.1016/j.cell.2008.09.045
   Zhang ZC, 2011, PLOS ONE, V6, DOI [10.1371/journal.pone.0028817, 10.1371/journal.pone.0024608]
NR 52
TC 2
Z9 2
U1 1
U2 3
PU WILEY
PI HOBOKEN
PA 111 RIVER ST, HOBOKEN 07030-5774, NJ USA
SN 1742-464X
EI 1742-4658
J9 FEBS J
JI FEBS J.
PD DEC
PY 2019
VL 286
IS 24
BP 4910
EP 4925
DI 10.1111/febs.15002
EA JUL 2019
PG 16
WC Biochemistry & Molecular Biology
WE Science Citation Index Expanded (SCI-EXPANDED)
SC Biochemistry & Molecular Biology
GA OB9NK
UT WOS:000479824200001
PM 31317644
OA hybrid, Green Published
DA 2022-04-10
ER

PT J
AU Nunez-O'Mara, A
   Berra, E
AF Nunez-O'Mara, Analia
   Berra, Edurne
TI Deciphering the emerging role of sumoylationconjugation in the
   hypoxia-signaling cascade
SO BIOLOGICAL CHEMISTRY
LA English
DT Review
DE cancer; hypoxia inducible factor (HIF); hypoxic pathway; oxygen
   homeostasis; prolyl hydroxylase domain containing proteins (PHDs);
   SUMOylation
ID IN-VITRO; PROTEIN SUMOYLATION; transcription factor; TUMOR-SUPPRESSOR;
   BINDING PROTEIN; DNA-REPAIR; E3 LIGASE; UBIQUITIN; ISOPEPTIDASE; ENZYME
AB By driving the primary transcriptional response, the hypoxia inducible factor (HIF) is a master player of the hypoxia-signaling cascade, activation of which is essential to maintain oxygen homeostasis. HIF is formed by the interaction of a constitutive HIF-1 beta subunit with a HIF-alpha subunit tightly regulated through the concerted action of the prolyl hydroxylase domain containing proteins (PHDs) and factor inhibiting HIF. In well-oxygenated cells, HIF-alpha prolyl-hydroxylation by PHDs is the recognition signal for the binding of the ubiquitinationE3 ligase pVHL, allowing protein poly-ubiquitination and degradation by the proteasome. Factor inhibiting HIF-mediated asparaginyl hydroxylation prevents interaction with the CBP/p300 coactivator and hence reduces HIF-dependent transcriptional activity. Upon low oxygen availability, HIF-alpha hydroxylation is blocked, resulting in protein stabilization and HIF complex activation. post-translational modification other than hydroxylation appear to be important in the cellular response to hypoxia. S mall ubiquitin-like modifier (SUMO) is a 10 kDa protein readily conjugated to the lysine (K) residues of numerous cellular substrates in a sequential process termed SUMOylation. Recent data support the idea that a fine balance in SUMOylation/deSUMOylation is required for the adequate activation of the hypoxia-signaling cascade. In the present review, we will concentrate on the mechanism of SUMOylation and its consequences in the cellular response to hypoxia.
C1 [Nunez-O'Mara, Analia; Berra, Edurne] CIC bioGUNE, E-48160 Derio, Spain.
RP Berra, E (corresponding author), CIC bioGUNE, Parque Tecnol Bizkaia,Ed 801A, E-48160 Derio, Spain.
EM eberra@cicbiogune.es
RI cancer, biogune/H-7276-2012; Berra, Edurne/F-9692-2011
OI Berra, Edurne/0000-0002-3820-5744
FU Ministerio de Economia y CompetitividadSpanish Government
   [SAF2007-64597, SAF2010-20067]; FPI fellowshipSpanish Government
   [BES-2008-003163]; HypoxiaNet COST ActionEuropean Cooperation in Science
   and Technology (COST) [TD0901]
FX We thank all the members of the laboratory for their help and support.
   We apologize to the many research groups whose work was omitted owing to
   space constraints. Work in our laboratory is partially supported by
   grants from Ministerio de Economia y Competitividad [SAF2007-64597 and
   SAF2010-20067]. A.N. is funded by an FPI fellowship (BES-2008-003163).
   The authors would also like to thank the HypoxiaNet COST Action-TD0901
   for support.
CR Agbor TA, 2011, J BIOL CHEM, V286, P4718, DOI 10.1074/jbc.M110.115931
   Anckar J, 2006, MOL CELL BIOL, V26, P955, DOI 10.1128/MCB.26.3.955-964.2006
   Bae SH, 2004, BIOCHEM BIOPH RES CO, V324, P394, DOI 10.1016/j.bbrc.2004.09.068
   Bailey D, 2004, J BIOL CHEM, V279, P692, DOI 10.1074/jbc.M306195200
   Bayer P, 1998, J MOL BIOL, V280, P275, DOI 10.1006/jmbi.1998.1839
   Berta MA, 2007, BIOCHEM BIOPH RES CO, V360, P646, DOI 10.1016/j.bbrc.2007.06.103
   Bhaskar V, 2000, J BIOL CHEM, V275, P4033, DOI 10.1074/jbc.275.6.4033
   Bohren KM, 2004, J BIOL CHEM, V279, P27233, DOI 10.1074/jbc.M402273200
   Bossis G, 2005, MOL CELL BIOL, V25, P6964, DOI 10.1128/MCB.25.16.6964-6979.2005
   Branzei D, 2006, CELL, V127, P509, DOI 10.1016/j.cell.2006.08.050
   Cai QL, 2010, PLOS ONE, V5, DOI 10.1371/journal.pone.0009720
   Carbia-Nagashima A, 2007, CELL, V131, P309, DOI 10.1016/j.cell.2007.07.044
   Chen A, 1998, BIOCHEM MOL BIOL INT, V46, P1161
   Cheng J, 2007, CELL, V131, P584, DOI 10.1016/j.cell.2007.08.045
   Cheng JK, 2006, NEOPLASIA, V8, P667, DOI 10.1593/neo.06445
   Chiu SY, 2008, PLOS BIOL, V6, P2801, DOI 10.1371/journal.pbio.0060310
   Choudhury BK, 1997, BIOCHEM BIOPH RES CO, V234, P788, DOI 10.1006/bbrc.1997.6709
   Chupreta S, 2005, MOL CELL BIOL, V25, P4272, DOI 10.1128/MCB.25.10.4272-4282.2005
   Cimarosti H, 2008, NEUROPHARMACOLOGY, V54, P280, DOI 10.1016/j.neuropharm.2007.09.010
   Comerford KM, 2003, P NATL ACAD SCI USA, V100, P986, DOI 10.1073/pnas.0337412100
   Cremona CA, 2012, MOL CELL, V45, P422, DOI 10.1016/j.molcel.2011.11.028
   Culver C, 2010, MOL CELL BIOL, V30, P4901, DOI 10.1128/MCB.00409-10
   Dadke S, 2007, NAT CELL BIOL, V9, P80, DOI 10.1038/ncb1522
   Datwyler AL, 2011, J CEREBR BLOOD F MET, V31, P2152, DOI 10.1038/jcbfm.2011.112
   Desterro JMP, 1998, MOL CELL, V2, P233, DOI 10.1016/S1097-2765(00)80133-1
   Desterro JMP, 1997, FEBS LETT, V417, P297, DOI 10.1016/S0014-5793(97)01305-7
   Desterro JMP, 1999, J BIOL CHEM, V274, P10618, DOI 10.1074/jbc.274.15.10618
   Deyrieux AF, 2007, J CELL SCI, V120, P125, DOI 10.1242/jcs.03317
   Di Bacco A, 2006, MOL CELL BIOL, V26, P4489, DOI 10.1128/MCB.02301-05
   Dou H, 2010, MOL CELL, V39, P333, DOI 10.1016/j.molcel.2010.07.021
   Eladad S, 2005, HUM MOL GENET, V14, P1351, DOI 10.1093/hmg/ddi145
   Figueroa-Romero C, 2009, FASEB J, V23, P3917, DOI 10.1096/fj.09-136630
   FRERICHS KU, 1994, J CEREBR BLOOD F MET, V14, P193, DOI 10.1038/jcbfm.1994.26
   Frerichs KU, 1998, P NATL ACAD SCI USA, V95, P14511, DOI 10.1073/pnas.95.24.14511
   Frerichs KU, 1998, J CEREBR BLOOD F MET, V18, P168, DOI 10.1097/00004647-199802000-00007
   Giorgino F, 2000, P NATL ACAD SCI USA, V97, P1125, DOI 10.1073/pnas.97.3.1125
   Girdwood D, 2003, MOL CELL, V11, P1043, DOI 10.1016/S1097-2765(03)00141-2
   Golebiowski F, 2009, SCI SIGNAL, V2, DOI 10.1126/scisignal.2000282
   Gong L, 2006, J BIOL CHEM, V281, P15869, DOI 10.1074/jbc.M511658200
   Gong LM, 2000, J BIOL CHEM, V275, P3355, DOI 10.1074/jbc.275.5.3355
   Hanania U, 1999, PLANT J, V19, P533, DOI 10.1046/j.1365-313X.1999.00547.x
   Hang J, 2002, J BIOL CHEM, V277, P19961, DOI 10.1074/jbc.M201799200
   Heaton PR, 2012, PLOS ONE, V7, DOI 10.1371/journal.pone.0030165
   Hecker CM, 2006, J BIOL CHEM, V281, P16117, DOI 10.1074/jbc.M512757200
   Huang C, 2009, EMBO J, V28, P2748, DOI 10.1038/emboj.2009.210
   Johnson ES, 1997, J BIOL CHEM, V272, P26799, DOI 10.1074/jbc.272.43.26799
   Johnson ES, 1997, EMBO J, V16, P5509, DOI 10.1093/emboj/16.18.5509
   Kagey MH, 2003, CELL, V113, P127, DOI 10.1016/S0092-8674(03)00159-4
   Kahyo T, 2001, MOL CELL, V8, P713, DOI 10.1016/S1097-2765(01)00349-5
   Kang X, 2010, ONCOGENE, V29, P5568, DOI 10.1038/onc.2010.297
   Kim KI, 2000, J BIOL CHEM, V275, P14102, DOI 10.1074/jbc.275.19.14102
   Knipscheer P, 2008, MOL CELL, V31, P371, DOI 10.1016/j.molcel.2008.05.022
   Kotaja N, 2002, MOL CELL BIOL, V22, P5222, DOI 10.1128/MCB.22.14.5222-5234.2002
   Kuo HY, 2005, P NATL ACAD SCI USA, V102, P16973, DOI 10.1073/pnas.0504460102
   Kurepa J, 2003, J BIOL CHEM, V278, P6862, DOI 10.1074/jbc.M209694200
   Lallemand-Breitenbach V, 2008, NAT CELL BIOL, V10, P547, DOI 10.1038/ncb1717
   Lapenta V, 1997, GENOMICS, V40, P362, DOI 10.1006/geno.1996.4556
   Lee B, 2009, BIOCHEM J, V421, P449, DOI 10.1042/BJ20090142
   Lee Y, 2007, J CEREBR BLOOD F MET, V27, P950, DOI 10.1038/sj.jcbfm.9600395
   Lee YJ, 2009, J NEUROCHEM, V109, P257, DOI 10.1111/j.1471-4159.2009.05957.x
   Li SJ, 1999, NATURE, V398, P246, DOI 10.1038/18457
   Lima CD, 2008, J BIOL CHEM, V283, P32045, DOI 10.1074/jbc.M805655200
   Lin DY, 2006, MOL CELL, V24, P341, DOI 10.1016/j.molcel.2006.10.019
   Lois LM, 2005, EMBO J, V24, P439, DOI 10.1038/sj.emboj.7600552
   Mahajan R, 1997, CELL, V88, P97, DOI 10.1016/S0092-8674(00)81862-0
   Manza LL, 2004, CHEM RES TOXICOL, V17, P1706, DOI 10.1021/tx049767l
   Matic I, 2008, MOL CELL PROTEOMICS, V7, P132, DOI 10.1074/mcp.M700173-MCP200
   Matunis MJ, 1996, J CELL BIOL, V135, P1457, DOI 10.1083/jcb.135.6.1457
   Messner S, 2009, FASEB J, V23, P3978, DOI 10.1096/fj.09-137695
   Mikolajczyk J, 2007, J BIOL CHEM, V282, P26217, DOI 10.1074/jbc.M702444200
   Mo YY, 2005, ONCOGENE, V24, P2677, DOI 10.1038/sj.onc.1208210
   Mooney SM, 2010, BIOCHEMISTRY-US, V49, P1, DOI 10.1021/bi901263m
   Mukhopadhyay D, 2006, J CELL BIOL, V174, P939, DOI 10.1083/jcb.200510103
   Mullen JR, 2010, MOL CELL BIOL, V30, P3737, DOI 10.1128/MCB.01649-09
   Nacerddine K, 2005, DEV CELL, V9, P769, DOI 10.1016/j.devcel.2005.10.007
   Nishida T, 2000, EUR J BIOCHEM, V267, P6423, DOI 10.1046/j.1432-1327.2000.01729.x
   Nishida T, 2001, J BIOL CHEM, V276, P39060, DOI 10.1074/jbc.M103955200
   Okuma T, 1999, BIOCHEM BIOPH RES CO, V254, P693, DOI 10.1006/bbrc.1998.9995
   Pichler A, 2005, NAT STRUCT MOL BIOL, V12, P264, DOI 10.1038/nsmb903
   Pichler A, 2002, CELL, V108, P109, DOI 10.1016/S0092-8674(01)00633-X
   Potts PR, 2005, MOL CELL BIOL, V25, P7021, DOI 10.1128/MCB.25.16.7021-7032.2005
   Poukka H, 2000, P NATL ACAD SCI USA, V97, P14145, DOI 10.1073/pnas.97.26.14145
   Rodriguez MS, 2001, J BIOL CHEM, V276, P12654, DOI 10.1074/jbc.M009476200
   Sachdev S, 2001, GENE DEV, V15, P3088, DOI 10.1101/gad.944801
   Sacher M, 2006, NAT CELL BIOL, V8, P1284, DOI 10.1038/ncb1488
   Saitoh H, 2000, J BIOL CHEM, V275, P6252, DOI 10.1074/jbc.275.9.6252
   Schmidt D, 2002, P NATL ACAD SCI USA, V99, P2872, DOI 10.1073/pnas.052559499
   Schulz S, 2012, EMBO REP, V13, P930, DOI 10.1038/embor.2012.125
   Shao RJ, 2004, FEBS LETT, V569, P293, DOI 10.1016/j.febslet.2004.05.079
   Shen LN, 2006, BIOCHEM J, V397, P279, DOI 10.1042/BJ20052030
   Shen LN, 2009, BIOCHEM J, V421, P223, DOI 10.1042/BJ20090246
   Shin EJ, 2012, EMBO REP, V13, P339, DOI 10.1038/embor.2012.3
   Song J, 2005, J BIOL CHEM, V280, P40122, DOI 10.1074/jbc.M507059200
   Song J, 2004, P NATL ACAD SCI USA, V101, P14373, DOI 10.1073/pnas.0403498101
   Takahashi Y, 2001, J BIOL CHEM, V276, P48973, DOI 10.1074/jbc.M109295200
   Tatham MH, 2001, J BIOL CHEM, V276, P35368, DOI 10.1074/jbc.M104214200
   Tojo M, 2002, J BIOL CHEM, V277, P46576, DOI 10.1074/jbc.M205987200
   van Hagen M, 2010, NUCLEIC ACIDS RES, V38, P1922, DOI 10.1093/nar/gkp1157
   Wang LM, 2004, ONCOL REP, V11, P1319
   Weger S, 2005, FEBS LETT, V579, P5007, DOI 10.1016/j.febslet.2005.07.088
   Xu Y, 2010, J BIOL CHEM, V285, P36682, DOI 10.1074/jbc.M110.164236
   Xu Z, 2005, BIOCHEM J, V386, P325, DOI 10.1042/BJ20041210
   Yang W, 2008, J CEREBR BLOOD F MET, V28, P892, DOI 10.1038/sj.jcbfm.9600601
   Yang W, 2008, J CEREBR BLOOD F MET, V28, P269, DOI 10.1038/sj.jcbfm.9600523
   Yang W, 2012, J PROTEOME RES, V11, P1108, DOI 10.1021/pr200834f
   Yurchenko V, 2006, MOL CELL BIOL, V26, P1786, DOI 10.1128/MCB.26.5.1786-1794.2006
   Zhang FP, 2008, MOL CELL BIOL, V28, P5381, DOI 10.1128/MCB.00651-08
   Zhang H, 2002, MOL CELL BIOL, V22, P6498, DOI 10.1128/MCB.22.18.6498-6508.2002
   Zhao XL, 2005, P NATL ACAD SCI USA, V102, P4777, DOI 10.1073/pnas.0500537102
NR 109
TC 23
Z9 23
U1 0
U2 15
PU WALTER DE GRUYTER GMBH
PI BERLIN
PA GENTHINER STRASSE 13, D-10785 BERLIN, GERMANY
SN 1431-6730
EI 1437-4315
J9 BIOL CHEM
JI Biol. Chem.
PD APR
PY 2013
VL 394
IS 4
BP 459
EP 469
DI 10.1515/hsz-2012-0319
PG 11
WC Biochemistry & Molecular Biology
WE Science Citation Index Expanded (SCI-EXPANDED)
SC Biochemistry & Molecular Biology
GA 098WY
UT WOS:000315581000004
PM 23362194
DA 2022-04-10
ER

PT J
AU Riffo-Campos, AL
   Castillo, J
   Tur, G
   Gonzalez-Figueroa, P
   Georgieva, EI
   Rodriguez, JL
   Lopez-Rodas, G
   Rodrigo, MI
   Franco, L
AF Riffo-Campos, Angela L.
   Castillo, Josefa
   Tur, Gema
   Gonzalez-Figueroa, Paula
   Georgieva, Elena I.
   Rodriguez, Jose L.
   Lopez-Rodas, Gerardo
   Rodrigo, M. Isabel
   Franco, Luis
TI Nucleosome-specific, Time-dependent Changes in histone modification
   during Activation of the Early Growth Response 1 (Egr1) Gene
SO JOURNAL OF BIOLOGICAL CHEMISTRY
LA English
DT Article
DE Chromatin Remodeling; Histone Modification; Liver; Mouse; Small
   Interfering RNA (siRNA); Transcription Regulation
ID H3 LYSINE-9 METHYLATION; RNA-POLYMERASE-II; HUMAN GENOME;
   TRANSCRIPTIONAL ACTIVATION; cancer cells; CHROMATIN; PROMOTER;
   PHOSPHORYLATION; ACETYLATION; RESOLUTION
AB Background: Chromatin structure and histone modification regulate transcription in eukaryotes. Results: Activation of the early growth response gene 1 involves sliding and/or eviction of nucleosomes around the transcription start site and nucleosome-specific, time-dependent changes in histone modification. Conclusion: Remodeling mechanism and histone modification are specific for each nucleosome. Significance: Mononucleosomal level studies give unique information on chromatin functions.
   Histone post-translational modification and nucleosome remodeling are coordinate events involved in eukaryotic transcriptional regulation. There are relatively few data on the time course with which these events occur in individual nucleosomes. As a contribution to fill this gap, we first describe the nature and time course of structural changes in the nucleosomes -2, -1, and +1 of the murine Egr1 gene upon induction. To initiate the transient activation of the gene, we used the stimulation of MLP29 cells with phorbol esters and the in vivo activation after partial hepatectomy. In both models, nucleosomes -1 and +1 are partially evicted, whereas nucleosomes +1 and -2 slide downstream during transcription. The sliding of the latter nucleosome allows the EGR1 protein to bind its site, resulting in the repression of the gene. To decide whether EGR1 is involved in the sliding of nucleosome -2, Egr1 was knocked down. In the absence of detectable EGR1, the nucleosome still slides and remains downstream longer than in control cells, suggesting that the product of the gene may be rather involved in the returning of the nucleosome to the basal position. Moreover, the presence of eight epigenetic histone marks has been determined at a mononucleosomal level in that chromatin region. H3S10phK14ac, H3K4me3, H3K9me3, and H3K27me3 are characteristic of nucleosome +1, and H3K9ac and H4K16ac are mainly found in nucleosome -1, and H3K27ac predominates in nucleosomes -2 and -1. The temporal changes in these marks suggest distinct functions for some of them, although changes in H3K4me3 may result from histone turnover.
C1 [Riffo-Campos, Angela L.; Castillo, Josefa; Tur, Gema; Gonzalez-Figueroa, Paula; Georgieva, Elena I.; Rodriguez, Jose L.; Lopez-Rodas, Gerardo; Rodrigo, M. Isabel; Franco, Luis] Univ Valencia, Dept Biochem & Mol Biol, E-46100 Burjassot, Spain.
   [Riffo-Campos, Angela L.; Castillo, Josefa; Lopez-Rodas, Gerardo; Rodrigo, M. Isabel; Franco, Luis] Inst Hlth Res INCLIVA, Valencia 46010, Spain.
RP Franco, L (corresponding author), Univ Valencia, Dept Biochem & Mol Biol, Dr Moliner 50, E-46100 Burjassot, Spain.
EM luis.franco@uv.es
RI Riffo-Campos, Angela L./AAX-8637-2021; Georgieva, Elena/O-1674-2019;
   Gonzalez-Figueroa, Paula/W-3654-2018; LOPEZ-RODAS, GERARDO/I-1349-2015
OI Riffo-Campos, Angela L./0000-0001-6300-3338; Gonzalez-Figueroa,
   Paula/0000-0001-8270-552X; Franco, Luis/0000-0001-9610-6448;
   LOPEZ-RODAS, GERARDO/0000-0001-8367-653X
FU FISS Grant [FIS PI12/02110]
FX This work was supported in part by FISS Grant FIS PI12/02110 (to
   G.L.-R.).
CR Aicher WK, 1999, RHEUMATOL INT, V18, P207, DOI 10.1007/s002960050086
   Alkhatib SG, 2011, FEBS LETT, V585, P3197, DOI 10.1016/j.febslet.2011.09.003
   ARENTS G, 1993, P NATL ACAD SCI USA, V90, P10489, DOI 10.1073/pnas.90.22.10489
   ARENTS G, 1991, P NATL ACAD SCI USA, V88, P10148, DOI 10.1073/pnas.88.22.10148
   Barski A, 2007, CELL, V129, P823, DOI 10.1016/j.cell.2007.05.009
   Bernstein BE, 2005, CELL, V120, P169, DOI 10.1016/j.cell.2005.01.001
   Chen SZ, 2012, GENE DEV, V26, P1364, DOI 10.1101/gad.186056.111
   CHOMCZYNSKI P, 1987, ANAL BIOCHEM, V162, P156, DOI 10.1016/0003-2697(87)90021-2
   Conaway RC, 2009, TRENDS BIOCHEM SCI, V34, P71, DOI 10.1016/j.tibs.2008.10.010
   Drobic B, 2010, NUCLEIC ACIDS RES, V38, P3196, DOI 10.1093/nar/gkq030
   Du Z, 2013, MOL PLANT, V6, P1463, DOI 10.1093/mp/sst018
   Eissenberg JC, 2000, CURR OPIN GENET DEV, V10, P204, DOI 10.1016/S0959-437X(00)00058-7
   Euskirchen G, 2012, J BIOL CHEM, V287, P30897, DOI 10.1074/jbc.R111.309302
   Gardner KE, 2011, J MOL BIOL, V409, P36, DOI 10.1016/j.jmb.2011.01.040
   Guenther MG, 2007, CELL, V130, P77, DOI 10.1016/j.cell.2007.05.042
   Henikoff S, 2008, NAT REV GENET, V9, P15, DOI 10.1038/nrg2206
   Henikoff S, 2011, TRENDS GENET, V27, P389, DOI 10.1016/j.tig.2011.06.006
   Higgins GM, 1931, ARCH PATHOL, V12, P186
   Hondele M, 2013, NUCLEUS-AUSTIN, V4, P443, DOI 10.4161/nucl.27235
   Horikoshi Nobuo, 2013, Genome Integr, V4, P3, DOI 10.1186/2041-9414-4-3
   Hsieh FK, 2013, P NATL ACAD SCI USA, V110, P7654, DOI 10.1073/pnas.1222198110
   JANSSENTIMMEN U, 1989, GENE, V80, P325, DOI 10.1016/0378-1119(89)90296-5
   Karmodiya K, 2012, BMC GENOMICS, V13, DOI 10.1186/1471-2164-13-424
   Kimura H, 2013, J HUM GENET, V58, P439, DOI 10.1038/jhg.2013.66
   Kulaeva OI, 2013, BBA-GENE REGUL MECH, V1829, P76, DOI 10.1016/j.bbagrm.2012.08.015
   Kulaeva OI, 2010, P NATL ACAD SCI USA, V107, P11325, DOI 10.1073/pnas.1001148107
   Kumari Sujata, 2013, Subcell Biochem, V61, P3, DOI 10.1007/978-94-007-4525-4_1
   Kumbrink J, 2005, J BIOL CHEM, V280, P42785, DOI 10.1074/jbc.M511079200
   Lee ER, 2006, J BIOL CHEM, V281, P21162, DOI 10.1074/jbc.M602734200
   Li B, 2007, CELL, V128, P707, DOI 10.1016/j.cell.2007.01.015
   Li G, 2005, NAT STRUCT MOL BIOL, V12, P46, DOI 10.1038/nsmb869
   Liang GN, 2004, P NATL ACAD SCI USA, V101, P7357, DOI 10.1073/pnas.0401866101
   LOIDL P, 1988, FEBS LETT, V227, P91, DOI 10.1016/0014-5793(88)80874-3
   Luger K, 1997, NATURE, V389, P251, DOI 10.1038/38444
   MAHADEVAN LC, 1991, CELL, V65, P775, DOI 10.1016/0092-8674(91)90385-C
   Murawska M, 2011, TRANSCR-AUSTIN, V2, P244, DOI 10.4161/trns.2.6.17840
   Narlikar GJ, 2013, CELL, V154, P490, DOI 10.1016/j.cell.2013.07.011
   Nowak SJ, 2004, TRENDS GENET, V20, P214, DOI 10.1016/j.tig.2004.02.007
   Nozaki T, 2011, BMC GENOMICS, V12, DOI 10.1186/1471-2164-12-416
   Peters AHFM, 2002, NAT GENET, V30, P77, DOI 10.1038/ng789
   Peterson CL, 2004, CURR BIOL, V14, pR546, DOI 10.1016/j.cub.2004.07.007
   Poirier MG, 2008, J MOL BIOL, V379, P772, DOI 10.1016/j.jmb.2008.04.025
   Poirier MG, 2009, NAT STRUCT MOL BIOL, V16, P938, DOI 10.1038/nsmb.1650
   Rando OJ, 2009, ANNU REV BIOCHEM, V78, P245, DOI 10.1146/annurev.biochem.78.071107.134639
   Sacilotto N, 2011, PLOS ONE, V6, DOI 10.1371/journal.pone.0023318
   Sakurai K, 2011, CANCER RES, V71, P1680, DOI 10.1158/0008-5472.CAN-10-2345
   Sandoval J, 2004, NUCLEIC ACIDS RES, V32, DOI 10.1093/nar/gnh091
   Schones DE, 2008, CELL, V132, P887, DOI 10.1016/j.cell.2008.02.022
   Segal E, 2009, TRENDS GENET, V25, P335, DOI 10.1016/j.tig.2009.06.002
   Simboeck E, 2010, J BIOL CHEM, V285, P41062, DOI 10.1074/jbc.M110.184481
   Strahl BD, 2000, NATURE, V403, P41, DOI 10.1038/47412
   Szerlong HJ, 2010, J BIOL CHEM, V285, P31954, DOI 10.1074/jbc.M110.148718
   Tan MJ, 2011, CELL, V146, P1015, DOI 10.1016/j.cell.2011.08.008
   Tur G, 2010, CELL MOL LIFE SCI, V67, P4065, DOI 10.1007/s00018-010-0426-3
   Vakoc CR, 2005, MOL CELL, V19, P381, DOI 10.1016/j.molcel.2005.06.011
   Wang G, 2005, MOL CELL, V17, P683, DOI 10.1016/j.molcel.2005.02.010
   Wang ZB, 2008, NAT GENET, V40, P897, DOI 10.1038/ng.154
   Wiencke JK, 2008, ONCOGENE, V27, P2412, DOI 10.1038/sj.onc.1210895
   Xi LQ, 2010, BMC BIOINFORMATICS, V11, DOI 10.1186/1471-2105-11-346
   Zheng CG, 2009, CANCER RES, V69, P2324, DOI 10.1158/0008-5472.CAN-08-4113
NR 60
TC 15
Z9 16
U1 0
U2 18
PU AMER SOC BIOCHEMISTRY MOLECULAR BIOLOGY INC
PI BETHESDA
PA 9650 ROCKVILLE PIKE, BETHESDA, MD 20814-3996 USA
SN 0021-9258
EI 1083-351X
J9 J BIOL CHEM
JI J. Biol. Chem.
PD JAN 2
PY 2015
VL 290
IS 1
BP 197
EP 208
DI 10.1074/jbc.M114.579292
PG 12
WC Biochemistry & Molecular Biology
WE Science Citation Index Expanded (SCI-EXPANDED)
SC Biochemistry & Molecular Biology
GA AX9OG
UT WOS:000347231200017
PM 25378406
OA Green Published, hybrid
DA 2022-04-10
ER

PT J
AU Papale, M
   Ferretti, E
   Battaglia, G
   Bellavia, D
   Mai, A
   Tafani, M
AF Papale, Marco
   Ferretti, Elisabetta
   Battaglia, Giuseppe
   Bellavia, Diana
   Mai, Antonello
   Tafani, Marco
TI EZH2, HIF-1, and Their inhibitor: An Overview on Pediatric Cancers
SO FRONTIERS IN PEDIATRICS
LA English
DT Review
DE HIF-1; EZH2; tumors; cancers; oncology; hypoxia; epigenetic
ID CONGENITAL GLIOBLASTOMA-MULTIFORME; ENDOTHELIAL GROWTH-FACTOR;
   HYPOXIA-INDUCIBLE FACTOR-1; HIGH-GRADE GLIOMAS; DISTINCT SUBGROUPS;
   HISTONE H3.3; BRAIN-TUMORS; FACTOR-I; EXPRESSION; ACTIVATION
AB During the past decades, several discoveries have established the role of epigenetic modifications and cellular microenvironment in tumor growth and progression. One of the main representatives concerning epigenetic modification is the polycomb group (PcG). It is composed of different highly conserved epigenetic effector proteins preserving, through several post-translational modification of histones, the silenced state of the genes implicated in a wide range of central biological events such as development, stem cell formation, and tumor progression. Proteins of the PcG can be divided in polycomb repressive complexes (PRCs): PRC1 and PRC2. In particular, enhancer of zeste homolog 2 (EZH2), the catalytic core subunit of PRC2, acts as an epigenetic silencer of many tumor suppressor genes through the trimethylation of lysine 27 on histone H3, an essential binding site for DNA methyl transferases and histone deacetylases. A growing number of data suggests that overexpression of EZH2 associates with progression and poor outcome in a large number of cancer cases. Hypoxia inducible factor (HIF) is an important transcription factor involved in modulating cellular response to the microenvironment by promoting and regulating tumor development such as angiogenesis, inflammation, metabolic reprogramming, invasion, and metastatic fate. The HIF complex is represented by different subunits (alpha and beta) acting together and promoting the expression of vascular endothelial growth factor (VEGF), hexokinase II (HKII), receptor for advanced glycation end products (RAGE), carbonic anhydrase (CA), etc., after binding to the hypoxia-response element (HRE) binding site on the DNA. In this review, we will try to connect these two players by detailing the following: (i) the activity and influence of these two important regulators of cancer progression in particular for what concerns pediatric tumors, (ii) the possible correlation between them, and (iii) the feasibility and efficiency to contrast them using several inhibitor.
C1 [Papale, Marco; Ferretti, Elisabetta; Tafani, Marco] Sapienza Univ, Dept Expt Med, Rome, Italy.
   [Ferretti, Elisabetta; Battaglia, Giuseppe] IRCCS Neuromed, Isernia, Italy.
   [Bellavia, Diana] Sapienza Univ, Dept Mol Med, Rome, Italy.
   [Mai, Antonello] Sapienza Univ, Dept Drug Chem & Technol, Rome, Italy.
RP Tafani, M (corresponding author), Sapienza Univ, Dept Expt Med, Rome, Italy.; Mai, A (corresponding author), Sapienza Univ, Dept Drug Chem & Technol, Rome, Italy.
EM antonello.mai@uniroma1.it; marco.tafani@uniroma1.it
RI Bellavia, Diana/AAO-6348-2021; Tafani, Marco/C-3275-2017; Mai,
   Antonello/AAC-2144-2019; Tafani, Marco/U-7230-2019; Ferretti,
   Elisabetta/G-5413-2013
OI Tafani, Marco/0000-0001-7128-810X; Tafani, Marco/0000-0001-7128-810X;
   Bellavia, Diana/0000-0001-5728-2537; Ferretti,
   Elisabetta/0000-0001-7265-6429
CR Astolfi A, 2014, ONCOTARGET, V5, P120, DOI 10.18632/oncotarget.1337
   Bid HK, 2014, CANCER RES, V74, P320, DOI 10.1158/0008-5472.CAN-13-0894
   Birner P, 2003, BRAIN PATHOL, V13, P133, DOI 10.1111/j.1750-3639.2003.tb00013.x
   Cage TA, 2012, NEUROSURG CLIN N AM, V23, P515, DOI 10.1016/j.nec.2012.04.007
   Cao P, 2010, MOL CANCER, V9, DOI 10.1186/1476-4598-9-108
   CHANDER R, 1992, BIOCHEM PHARMACOL, V44, P180, DOI 10.1016/0006-2952(92)90054-M
   Chang CJ, 2012, BRIT J CANCER, V106, P243, DOI 10.1038/bjc.2011.551
   Chang CJ, 2011, CANCER CELL, V19, P86, DOI 10.1016/j.ccr.2010.10.035
   Chase A, 2011, CLIN CANCER RES, V17, P2613, DOI 10.1158/1078-0432.CCR-10-2156
   Chen S, 2016, CANCER LETT, V383, P73, DOI 10.1016/j.canlet.2016.09.027
   Choi YJ, 2011, J NAT MED-TOKYO, V65, P344, DOI 10.1007/s11418-010-0504-8
   Cohen KJ, 2011, NEURO-ONCOLOGY, V13, P317, DOI 10.1093/neuonc/noq191
   D'Angelo V, 2015, J EXP CLIN CANC RES, V34, DOI 10.1186/s13046-015-0191-0
   Danis E, 2016, CELL REP, V14, P1953, DOI 10.1016/j.celrep.2016.01.064
   Khuong-Quang DA, 2012, ACTA NEUROPATHOL, V124, P439, DOI 10.1007/s00401-012-0998-0
   Dubuc Adrian M, 2012, Methods Mol Biol, V863, P139, DOI 10.1007/978-1-61779-612-8_8
   Dubuc AM, 2013, ACTA NEUROPATHOL, V125, P373, DOI 10.1007/s00401-012-1070-9
   Dunn GP, 2012, GENE DEV, V26, P756, DOI 10.1101/gad.187922.112
   El-Naggar AM, 2015, CANCER CELL, V27, P682, DOI 10.1016/j.ccell.2015.04.003
   Fangusaro J, 2012, FRONT ONCOL, V2, DOI 10.3389/fonc.2012.00105
   Flynn JR, 2008, CANCER-AM CANCER SOC, V113, P1032, DOI 10.1002/cncr.23678
   Gaddipati JP, 1999, MOL CELL BIOCHEM, V194, P271, DOI 10.1023/A:1006982028460
   Garofalo C, 2013, PLOS ONE, V8, DOI 10.1371/journal.pone.0083832
   Gilbertson RJ, 2003, CLIN CANCER RES, V9, P3620
   Glod J, 2016, J PEDIAT HEMATOL ONC, V38, P249, DOI 10.1097/MPH.0000000000000551
   Hou LC, 2008, PEDIATR NEUROSURG, V44, P304, DOI 10.1159/000134922
   Huang Y, 2016, TUMOR BIOL, V37, P14903, DOI 10.1007/s13277-016-5392-4
   Isaacs JS, 2002, J BIOL CHEM, V277, P29936, DOI 10.1074/jbc.M204733200
   Jones C, 2014, NAT REV CANCER, V14, P651, DOI 10.1038/nrc3811
   Jones PA, 2002, NAT REV GENET, V3, P415, DOI 10.1038/nrg816
   Kia SK, 2008, MOL CELL BIOL, V28, P3457, DOI 10.1128/MCB.02019-07
   Kikuchi J, 2015, J CLIN INVEST, V125, P4375, DOI 10.1172/JCI80325
   Kim JW, 2007, MOL CELL BIOL, V27, P7381, DOI 10.1128/MCB.00440-07
   Kim KH, 2016, NAT MED, V22, P128, DOI 10.1038/nm.4036
   Knowles HJ, 2010, BMC CANCER, V10, DOI 10.1186/1471-2407-10-372
   Knutson SK, 2012, NAT CHEM BIOL, V8, P890, DOI [10.1038/NCHEMBIO.1084, 10.1038/nchembio.1084]
   Konze KD, 2013, ACS CHEM BIOL, V8, P1324, DOI [10.1021/cb400133J, 10.1021/cb400133j]
   Kool M, 2012, ACTA NEUROPATHOL, V123, P473, DOI 10.1007/s00401-012-0958-8
   Korkolopoulou P, 2004, NEUROPATH APPL NEURO, V30, P267, DOI 10.1111/j.1365-2990.2003.00535.x
   Li X, 2019, BIOSCIENCE REP, V39, DOI 10.1042/BSR20180268
   Lind MI, 2018, HEREDITY, V121, P205, DOI 10.1038/s41437-018-0113-y
   Liu XL, 2013, J EXP CLIN CANC RES, V32, DOI 10.1186/1756-9966-32-96
   MacDonald TJ, 2011, NEURO-ONCOLOGY, V13, P1049, DOI 10.1093/neuonc/nor092
   Macy ME, 2012, NEURO-ONCOLOGY, V14, P931, DOI 10.1093/neuonc/nos125
   Mahara S, 2016, P NATL ACAD SCI USA, V113, pE3735, DOI 10.1073/pnas.1602079113
   Majer CR, 2012, FEBS LETT, V586, P3448, DOI 10.1016/j.febslet.2012.07.066
   Marcu LG, 2014, COMPUT MATH METHOD M, V2014, DOI 10.1155/2014/624642
   Margueron R, 2011, NATURE, V469, P343, DOI 10.1038/nature09784
   Mashiko R, 2011, J NEURO-ONCOL, V102, P43, DOI 10.1007/s11060-010-0292-8
   McCabe MT, 2012, P NATL ACAD SCI USA, V109, P2989, DOI 10.1073/pnas.1116418109
   Minet E, 1999, FEBS LETT, V460, P251, DOI 10.1016/S0014-5793(99)01359-9
   Nagle DG, 2006, CURR DRUG target, V7, P355, DOI 10.2174/138945006776054979
   Northcott PA, 2012, NAT REV CANCER, V12, P818, DOI 10.1038/nrc3410
   Northcott PA, 2012, NAT REV NEUROL, V8, P340, DOI 10.1038/nrneurol.2012.78
   Paget S., 1989, LANCET, V8, P98, DOI [10.1007/s10238-006-0117-4, DOI 10.1007/s10238-006-0117-4, DOI 10.1016/S0140-6736(00)49915-0]
   Pang B, 2016, ONCOTARGET, V7, P45134, DOI 10.18632/oncotarget.9761
   Parsons DW, 2011, SCIENCE, V331, P435, DOI 10.1126/science.1198056
   Perry A, 2004, CANCER, V101, P2318, DOI 10.1002/cncr.20625
   Priego N, 2018, NAT MED, V24, P1024, DOI 10.1038/s41591-018-0044-4
   Robinson G, 2012, NATURE, V488, P43, DOI 10.1038/nature11213
   Schuettengruber B, 2007, CELL, V128, P735, DOI 10.1016/j.cell.2007.02.009
   Schwartzentruber J, 2012, NATURE, V482, P226, DOI [10.1038/nature10833, 10.1007/s13311-012-0137-6]
   Seker A, 2006, J NEUROSURG, V105, P473, DOI 10.3171/ped.2006.105.6.473
   Semenza GL, 2002, INTERNAL MED, V41, P79, DOI 10.2169/internalmedicine.41.79
   Semenza GL, 2007, SCI STKE, DOI DOI 10.1126/STKE.4072007CM8
   Semenza GL, 2007, DRUG DISCOV TODAY, V12, P853, DOI 10.1016/j.drudis.2007.08.006
   Semenza GL, 2013, J CLIN INVEST, V123, P3664, DOI 10.1172/JCI67230
   Semenza GL, 2012, TRENDS PHARMACOL SCI, V33, P207, DOI 10.1016/j.tips.2012.01.005
   Semenza GL, 2011, BBA-MOL CELL RES, V1813, P1263, DOI 10.1016/j.bbamcr.2010.08.006
   Sondergaard KL, 2002, NEUROPATH APPL NEURO, V28, P210, DOI 10.1046/j.1365-2990.2002.00391.x
   Srinivas V, 1998, J BIOL CHEM, V273, P18019, DOI 10.1074/jbc.273.29.18019
   Sturm D, 2012, CANCER CELL, V22, P425, DOI 10.1016/j.ccr.2012.08.024
   Tafani M, 2013, FRONT PHARMACOL, V4, DOI 10.3389/fphar.2013.00013
   Tan JZ, 2014, ACTA PHARMACOL SIN, V35, P161, DOI 10.1038/aps.2013.161
   Taylor MD, 2012, ACTA NEUROPATHOL, V123, P465, DOI 10.1007/s00401-011-0922-z
   Vaupel P, 2007, CANCER METAST REV, V26, P225, DOI 10.1007/s10555-007-9055-1
   Vo BT, 2017, CELL REP, V18, P2907, DOI 10.1016/j.celrep.2017.02.073
   Wilson BG, 2010, CANCER CELL, V18, P316, DOI 10.1016/j.ccr.2010.09.006
   Winters JL, 2001, J NEUROL SCI, V188, P13, DOI 10.1016/S0022-510X(01)00538-X
   Wu G, 2012, NAT GENET, V44, P251, DOI 10.1038/ng.1102
   Xia Y, 2012, EUR J MED CHEM, V49, P24, DOI 10.1016/j.ejmech.2012.01.033
   Yamaguchi H, 2014, CANCER RES TREAT, V46, P209, DOI 10.4143/crt.2014.46.3.209
   Yoo H, 2010, INT J MOL MED, V26, P3, DOI 10.3892/ijmm_00000427
   Zagzag D, 2000, CANCER-AM CANCER SOC, V88, P2606, DOI 10.1002/1097-0142(20000601)88:11<2606::AID-CNCR25>3.0.CO;2-W
   Zhang JH, 2012, NATURE, V481, P157, DOI 10.1038/nature10725
   Zhou JB, 2011, BLOOD, V118, P2830, DOI 10.1182/blood-2010-07-294827
NR 86
TC 9
Z9 10
U1 0
U2 1
PU FRONTIERS MEDIA SA
PI LAUSANNE
PA AVENUE DU TRIBUNAL FEDERAL 34, LAUSANNE, CH-1015, SWITZERLAND
SN 2296-2360
J9 FRONT PEDIATR
JI Front. Pediatr.
PD NOV 19
PY 2018
VL 6
AR 328
DI 10.3389/fped.2018.00328
PG 13
WC Pediatrics
WE Science Citation Index Expanded (SCI-EXPANDED)
SC Pediatrics
GA HA7XC
UT WOS:000450498300001
PM 30510924
OA gold, Green Published
DA 2022-04-10
ER

PT J
AU Chen, LX
   Shao, CX
   Cobos, E
   Wang, JS
   Gao, WM
AF Chen, Lixia
   Shao, Changxia
   Cobos, Everardo
   Wang, Jia-Sheng
   Gao, Weimin
TI 4-(Methylnitro-Samino)-1-(3-Pyridyl)-1-Butanone Induces CRM1-Dependent
   P53 Nuclear Accumulation in Human Bronchial Epithelial Cells
SO TOXICOLOGICAL SCIENCES
LA English
DT Article
DE 4-(methylnitro-samino)-1-(3-pyridyl)-1-butanone; p53; chromosomal region
   maintenance 1; nucleocytoplasmic shuttling factors; poly(ADP-ribose)
   polymerase 1
ID WILD-TYPE P53; LUNG-CANCER; dna damage; post-translational modification;
   TUMOR SUPPRESSION; TOBACCO-SMOKE; HUMAN CYP2A13; ACTIVATION; TRANSPORT;
   PROTEIN
AB 4-(Methylnitro-samino)-1-(3-pyridyl)-1-butanone (NNK), a known tobacco-specific human lung carcinogen, is notorious for causing DNA damage. The tumor suppressor gene p53 has multiple functions in response to DNA damage. Besides being regulated by post-translational modification (PTMs), p53 function is modulated by nucleocytoplasmic shuttling factors (NSFs). In this study, the alterations of p53 protein after NNK exposure and the molecular mechanism involved p53 PTMs and NSFs in human bronchial epithelial cells BEAS-2B were investigated. NNK induced p53 nuclear accumulation and upregulated the expression of p21, a p53 target gene. Among the five NSFs examined, chromosomal region maintenance 1 (CRM1), interacting with p53 and exporting p53 from nucleus to cytoplasm, was significantly downregulated after NNK exposure. Increases of p53 phosphorylation and poly (ADP-ribosyl)ation were found in NNK-treated cells as compared with the controls. The upregulation of p53 poly(ADP-ribosyl)ation was induced by the enhanced expression of poly(ADP-ribose) polymerase 1 after NNK exposure. Collectively, p53 went through PTMs in response to DNA damage, and the modified p53 had a tendency for nuclear accumulation, which could result from CRM1 downregulation. Consequently, the activation of p53 led to subsequent induction of its downstream target. These data could facilitate the better understanding of chemical carcinogenesis induced by NNK.
C1 [Chen, Lixia; Shao, Changxia; Gao, Weimin] Texas Tech Univ, Dept Environm Toxicol, Inst Environm & Human Hlth, Lubbock, TX 79409 USA.
   [Cobos, Everardo; Gao, Weimin] Texas Tech Univ, Hlth Sci Ctr, Dept Internal Med, Lubbock, TX 79430 USA.
   [Wang, Jia-Sheng] Univ Georgia, Dept Environm Hlth Sci, Coll Publ Hlth, Athens, GA 30602 USA.
RP Gao, WM (corresponding author), Texas Tech Univ, Dept Environm Toxicol, Inst Environm & Human Hlth, Box 41163, Lubbock, TX 79409 USA.
EM weimin.gao@tiehh.ttu.edu
RI CHEN, LIXIA/E-6207-2012
CR Abbas T, 2009, NAT REV CANCER, V9, P400, DOI 10.1038/nrc2657
   Agarwal ML, 1997, ONCOGENE, V15, P1035, DOI 10.1038/sj.onc.1201274
   Avkin S, 2002, P NATL ACAD SCI USA, V99, P3764, DOI 10.1073/pnas.062038699
   Bargonetti J, 2002, CURR OPIN ONCOL, V14, P86, DOI 10.1097/00001622-200201000-00015
   Bode AM, 2004, NAT REV CANCER, V4, P793, DOI 10.1038/nrc1455
   ELDEIRY WS, 1993, CELL, V75, P817, DOI 10.1016/0092-8674(93)90500-P
   Fried H, 2003, CELL MOL LIFE SCI, V60, P1659, DOI 10.1007/s00018-003-3070-3
   Gao WM, 2003, LUNG CANCER-J IASLC, V40, P141, DOI 10.1016/S0169-5002(03)00035-7
   Gomez M, 2006, MOL BIOL CELL, V17, P1686, DOI 10.1091/mbc.E05-07-0672
   Hecht SS, 1998, CHEM RES TOXICOL, V11, P559, DOI 10.1021/tx980005y
   Hecht SS, 2002, LANCET ONCOL, V3, P461, DOI 10.1016/S1470-2045(02)00815-X
   Hecht SS, 2005, CARCINOGENESIS, V26, P1488, DOI 10.1093/carcin/bgi148
   Hecht SS, 1999, JNCI-J NATL CANCER I, V91, P1194, DOI 10.1093/jnci/91.14.1194
   Hecht SS, 1996, CRIT REV TOXICOL, V26, P163, DOI 10.3109/10408449609017929
   Henderson BR, 2000, NAT CELL BIOL, V2, P653, DOI 10.1038/35023605
   Imasaki T, 2007, MOL CELL, V28, P57, DOI 10.1016/j.molcel.2007.08.006
   JEMAL A, 2009, CANC FACTS FIGURES 2
   Jemal A, 2008, JNCI-J NATL CANCER I, V100, P1672, DOI 10.1093/jnci/djn389
   Jimenez GS, 1999, ONCOGENE, V18, P7656, DOI 10.1038/sj.onc.1203013
   Joers A, 2004, ONCOGENE, V23, P6175, DOI 10.1038/sj.onc.1207864
   Kanai M, 2007, NAT CELL BIOL, V9, P1175, DOI 10.1038/ncb1638
   Kapoor M, 1998, P NATL ACAD SCI USA, V95, P2834, DOI 10.1073/pnas.95.6.2834
   KASTAN MB, 1992, CELL, V71, P587, DOI 10.1016/0092-8674(92)90593-2
   Kau TR, 2004, NAT REV CANCER, V4, P106, DOI 10.1038/nrc1274
   Kaustov L, 2006, CELL CYCLE, V5, P489, DOI 10.4161/cc.5.5.2489
   Kim E, 2009, BIOCHEM PHARMACOL, V77, P11, DOI 10.1016/j.bcp.2008.08.030
   Komlodi-Pasztor E, 2009, ONCOGENE, V28, P3111, DOI 10.1038/onc.2009.166
   Kudo N, 1997, J BIOL CHEM, V272, P29742, DOI 10.1074/jbc.272.47.29742
   Lavin MF, 2006, CELL DEATH DIFFER, V13, P941, DOI 10.1038/sj.cdd.4401925
   Levine AJ, 1997, CELL, V88, P323, DOI 10.1016/S0092-8674(00)81871-1
   Ling GY, 2007, MOL PHARMACOL, V71, P807, DOI 10.1124/mol.106.031104
   Macara IG, 2001, MICROBIOL MOL BIOL R, V65, P570, DOI 10.1128/MMBR.65.4.570-594.2001
   Meek DW, 2009, NAT REV CANCER, V9, P714, DOI 10.1038/nrc2716
   Nie LH, 2007, J BIOL CHEM, V282, P14616, DOI 10.1074/jbc.M610515200
   Proulx LI, 2005, CLIN EXP IMMUNOL, V140, P46, DOI 10.1111/j.1365-2249.2005.02739.x
   Rout MP, 2001, J BIOL CHEM, V276, P16593, DOI 10.1074/jbc.R100015200
   Russo P, 2008, J NATL CANCER I, V100, P1043, DOI 10.1093/jnci/djn203
   Ryan KM, 2001, CURR OPIN CELL BIOL, V13, P332, DOI 10.1016/S0955-0674(00)00216-7
   Schlamp CL, 1997, J NATL CANCER I, V89, P1530, DOI 10.1093/jnci/89.20.1530
   SHOPLAND DR, 1991, JNCI-J NATL CANCER I, V83, P1142, DOI 10.1093/jnci/83.16.1142
   Simbulan-Rosenthal CM, 1999, CANCER RES, V59, P2190
   Simbulan-Rosenthal CM, 2001, NEOPLASIA, V3, P179, DOI 10.1038/sj.neo.7900155
   Solozobova V, 2009, BMC CELL BIOL, V10, DOI 10.1186/1471-2121-10-46
   STANLEY LA, 1995, TOXICOLOGY, V96, P173, DOI 10.1016/0300-483X(94)02991-3
   STENMARKASKMALM M, 1994, EUR J CANCER, V30A, P175, DOI 10.1016/0959-8049(94)90082-5
   SUN XF, 1992, LANCET, V340, P1369, DOI 10.1016/0140-6736(92)92558-W
   Uldrijan S, 2002, CHEM LISTY, V96, P145
   Wang SL, 2006, TOXICOL SCI, V94, P38, DOI 10.1093/toxsci/kfl081
   Wingo PA, 1999, J NATL CANCER I, V91, P675, DOI 10.1093/jnci/91.8.675
NR 49
TC 12
Z9 12
U1 0
U2 8
PU OXFORD UNIV PRESS
PI OXFORD
PA GREAT CLARENDON ST, OXFORD OX2 6DP, ENGLAND
SN 1096-6080
J9 TOXICOL SCI
JI Toxicol. Sci.
PD JUL
PY 2010
VL 116
IS 1
BP 206
EP 215
DI 10.1093/toxsci/kfq123
PG 10
WC Toxicology
WE Science Citation Index Expanded (SCI-EXPANDED)
SC Toxicology
GA 617XZ
UT WOS:000279316500021
PM 20421341
OA Bronze
DA 2022-04-10
ER

PT J
AU De Vellis, C
   Pietrobono, S
   Stecca, B
AF De Vellis, Chiara
   Pietrobono, Silvia
   Stecca, Barbara
TI The Role of Glycosylation in Melanoma Progression
SO CELLS
LA English
DT Review
DE melanoma; metastasis; immune evasion; glycosylation; sialylation;
   fucosylation; glycan branching
ID N-ACETYLGLUCOSAMINYLTRANSFERASE-V; SIALYL-LEWIS-X; TRANSCRIPTIONAL
   REGULATION; BIOLOGICAL FUNCTIONS; I ANTIGEN; EXPRESSION; CANCER; CELLS;
   GLYCANS; OLIGOSACCHARIDES
AB Malignant melanoma is the most aggressive form of skin cancer, which originates from the malignant transformation of melanocytes, the melanin-producing cells of the skin. Melanoma progression is typically described as a stepwise process in which metastasis formation ensues late during disease. A large body of evidence has shown that the accumulation of genetic and epigenetic alterations drives melanoma progression through the different steps. Mortality in melanoma is associated with metastatic disease. Accordingly, early-stage melanoma can be cured in the majority of cases by surgical excision, while late-stage melanoma is a highly lethal disease. Glycosylation is a post-translational modification that involves the transfer of glycosyl moieties to specific amino acid residues of proteins to form glycosidic bonds through the activity of glycosyltransferases. Aberrant glycosylation is considered a hallmark of cancer as it occurs in the majority of tumor types, including melanoma. The most widely occurring glycosylation changes in melanoma are represented by sialylation, fucosylation, and N- and I-glycan branching. In this review, we discuss the role of glycosylation in melanoma and provide insights on the mechanism by which aberrant glycosylation promotes melanoma progression through activation of invasion and metastasis, immune evasion and cell proliferation.
C1 [De Vellis, Chiara; Pietrobono, Silvia; Stecca, Barbara] Inst Canc Res & Prevent ISPRO, Tumor Cell Biol Unit, Core Res Lab, Viale Pieraccini 6, I-50139 Florence, Italy.
RP Stecca, B (corresponding author), Inst Canc Res & Prevent ISPRO, Tumor Cell Biol Unit, Core Res Lab, Viale Pieraccini 6, I-50139 Florence, Italy.
EM chiaradevellis@gmail.com; silvia.pietrobono@ittumori.it;
   b.stecca@ispro.toscana.it
RI ; Pietrobono, Silvia/K-3932-2016
OI De Vellis, Chiara/0000-0002-7726-0404; Pietrobono,
   Silvia/0000-0002-5544-7286; Stecca, Barbara/0000-0003-1197-1622
FU Associazione Italiana per la Ricerca sul Cancro (AIRC)Fondazione AIRC
   per la ricerca sul cancro [IG-23091]; ISPRO; postdoctoral fellowship
   from AIRC [21168]
FX This research was funded by Associazione Italiana per la Ricerca sul
   Cancro (AIRC, grant number IG-23091) and institutional funding from
   ISPRO. Silvia Pietrobono was supported by a postdoctoral fellowship from
   AIRC (project number 21168).
CR Affara NI, 2014, CANCER CELL, V25, P809, DOI 10.1016/j.ccr.2014.04.026
   Agrawal P, 2017, CANCER CELL, V31, P804, DOI 10.1016/j.ccell.2017.05.007
   Akbani R, 2015, CELL, V161, P1681, DOI 10.1016/j.cell.2015.05.044
   Alatrash G, 2019, CLIN CANCER RES, V25, P2610, DOI 10.1158/1078-0432.CCR-18-1527
   Anguille S, 2014, LANCET ONCOL, V15, pE257, DOI 10.1016/S1470-2045(13)70585-0
   Balch CM, 2009, J CLIN ONCOL, V27, P6199, DOI 10.1200/JCO.2009.23.4799
   Bartels L, 2019, CANCER RES, V79, P3372, DOI 10.1158/0008-5472.CAN-18-0189
   Bastian K, 2021, INT J MOL SCI, V22, DOI 10.3390/ijms22010455
   Becker DJ, 2003, GLYCOBIOLOGY, V13, p41R, DOI 10.1093/glycob/cwg054
   BIERHUIZEN MFA, 1993, GENE DEV, V7, P468, DOI 10.1101/gad.7.3.468
   Brown JR, 2006, CLIN CANCER RES, V12, P2894, DOI 10.1158/1078-0432.CCR-05-2745
   Brown JR, 2003, J BIOL CHEM, V278, P23352, DOI 10.1074/jbc.M303093200
   Buckhaults P, 1997, J BIOL CHEM, V272, P19575, DOI 10.1074/jbc.272.31.19575
   Bull C, 2018, CANCER RES, V78, P3574, DOI 10.1158/0008-5472.CAN-17-3376
   Bull C, 2013, MOL CANCER THER, V12, P1935, DOI 10.1158/1535-7163.MCT-13-0279
   Chakraborty AK, 2001, CELL GROWTH DIFFER, V12, P623
   Chakraborty AK, 2009, MELANOMA RES, V19, P343, DOI 10.1097/CMR.0b013e32832fe121
   Chapman PB, 2011, NEW ENGL J MED, V364, P2507, DOI 10.1056/NEJMoa1103782
   Chen L, 1998, ONCOGENE, V17, P2087, DOI 10.1038/sj.onc.1202124
   Ciolczyk-Wierzbicka D, 2007, MED CHEM, V3, P418, DOI 10.2174/157340607781745401
   Cohen C, 2002, CLIN CANCER RES, V8, P3728
   Damsky WE, 2014, ONCOGENE, V33, P2413, DOI 10.1038/onc.2013.194
   de Jong G, 2021, CANCER IMMUNOL IMMUN, V70, P1569, DOI 10.1007/s00262-020-02780-9
   DENNIS JW, 1987, SCIENCE, V236, P582, DOI 10.1126/science.2953071
   Dimitroff CJ, 2019, P NATL ACAD SCI USA, V116, P13729, DOI 10.1073/pnas.1900268116
   Dobie C, 2021, BRIT J CANCER, V124, P76, DOI 10.1038/s41416-020-01126-7
   Flaherty KT, 2010, NEW ENGL J MED, V363, P809, DOI 10.1056/NEJMoa1002011
   Foster MM, 2003, CANCER RES, V63, P2775
   Fuster MM, 2005, NAT REV CANCER, V5, P526, DOI 10.1038/nrc1649
   Guo HB, 2012, J BIOL CHEM, V287, P24941, DOI 10.1074/jbc.M112.369355
   Haas Q, 2019, CANCER IMMUNOL RES, V7, P707, DOI 10.1158/2326-6066.CIR-18-0505
   Harduin-Lepers A, 2001, BIOCHIMIE, V83, P727, DOI 10.1016/S0300-9084(01)01301-3
   Jenkins RW, 2021, J INVEST DERMATOL, V141, P23, DOI 10.1016/j.jid.2020.03.943
   Kang R, 1996, J BIOL CHEM, V271, P26706, DOI 10.1074/jbc.271.43.26706
   Keeley T, 2018, PLOS ONE, V13, DOI 10.1371/journal.pone.0199128
   Kinslechner K, 2018, MOL CANCER RES, V16, P135, DOI 10.1158/1541-7786.MCR-17-0292
   Kizuka Y, 2016, BIOMOLECULES, V6, DOI 10.3390/biom6020025
   Ko JH, 1999, J BIOL CHEM, V274, P22941, DOI 10.1074/jbc.274.33.22941
   Kolasinska E, 2016, ACTA BIOCHIM POL, V63, P533, DOI 10.18388/abp.2015_1221
   Krauthammer M, 2015, NAT GENET, V47, P996, DOI 10.1038/ng.3361
   Kremser ME, 2008, BBA-GEN SUBJECTS, V1780, P1421, DOI 10.1016/j.bbagen.2008.07.011
   Laidler P, 2006, CANCER IMMUNOL IMMUN, V55, P112, DOI 10.1007/s00262-005-0019-4
   Larkin J, 2019, NEW ENGL J MED, V381, P1535, DOI 10.1056/NEJMoa1910836
   Lau E, 2015, SCI SIGNAL, V8, DOI 10.1126/scisignal.aac6479
   Lawrence MS, 2013, NATURE, V499, P214, DOI 10.1038/nature12213
   Li CW, 2016, NAT COMMUN, V7, DOI 10.1038/ncomms12632
   Li FJ, 2019, PROTEIN CELL, V10, P550, DOI 10.1007/s13238-018-0597-5
   Li YH, 2012, APPL MICROBIOL BIOT, V94, P887, DOI 10.1007/s00253-012-4040-1
   Link-Lenczowski P, 2018, GLYCOCONJUGATE J, V35, P217, DOI 10.1007/s10719-018-9814-y
   Lo JA, 2014, SCIENCE, V346, P945, DOI 10.1126/science.1253735
   Magalhaes A, 2017, CANCER CELL, V31, P733, DOI 10.1016/j.ccell.2017.05.012
   Magnet AD, 1997, GLYCOBIOLOGY, V7, P285, DOI 10.1093/glycob/7.2.285
   Meril S, 2020, MOL CARCINOGEN, V59, P713, DOI 10.1002/mc.23213
   Miller AJ, 2006, NEW ENGL J MED, V355, P51, DOI 10.1056/NEJMra052166
   More SK, 2015, BIOCHEM BIOPH RES CO, V460, P302, DOI 10.1016/j.bbrc.2015.03.030
   Munkley J, 2016, ONCOTARGET, V7, P35478, DOI 10.18632/oncotarget.8155
   Ochwat D, 2004, MELANOMA RES, V14, P479, DOI 10.1097/00008390-200412000-00007
   Ogura T, 2004, J BIOL CHEM, V279, P13711, DOI 10.1074/jbc.M310276200
   Perdicchio M, 2016, ONCOTARGET, V7, P8771, DOI 10.18632/oncotarget.6822
   Perez M, 2021, BRIT J DERMATOL, DOI 10.1111/bjd.19891
   Pietrobono S, 2020, NAT COMMUN, V11, DOI 10.1038/s41467-020-19575-2
   Pinho SS, 2015, NAT REV CANCER, V15, P540, DOI 10.1038/nrc3982
   Pochec E, 2003, BBA-MOL CELL RES, V1643, P113, DOI 10.1016/j.bbamcr.2003.10.004
   Pochec E, 2016, CANCER INVEST, V34, P45, DOI 10.3109/07357907.2015.1102928
   Pochec E, 2015, ACTA BIOCHIM POL, V62, P323, DOI 10.18388/abp.2015_1050
   Pochec E, 2013, EUR J CELL BIOL, V92, P355, DOI 10.1016/j.ejcb.2013.10.007
   Przybylo M, 2008, MOL VIS, V14, P625
   Przybylo M, 2007, BBA-GEN SUBJECTS, V1770, P1427, DOI 10.1016/j.bbagen.2007.05.006
   Ranjan A, 2013, J BIOSCIENCES, V38, P867, DOI 10.1007/s12038-013-9382-z
   Rodrigues JG, 2018, CELL IMMUNOL, V333, P46, DOI 10.1016/j.cellimm.2018.03.007
   Sarkar AK, 1997, J BIOL CHEM, V272, P25608, DOI 10.1074/jbc.272.41.25608
   SARKAR AK, 1995, P NATL ACAD SCI USA, V92, P3323, DOI 10.1073/pnas.92.8.3323
   Schadendorf D, 2018, LANCET, V392, P971, DOI 10.1016/S0140-6736(18)31559-9
   Schneider M, 2017, GLYCOBIOLOGY, V27, P601, DOI 10.1093/glycob/cwx034
   Shan X, 2020, IUBMB LIFE, V72, P942, DOI 10.1002/iub.2227
   Shan X, 2015, INT J ONCOL, V47, P701, DOI 10.3892/ijo.2015.3057
   Shan X, 2015, INT J ONCOL, V46, P1667, DOI 10.3892/ijo.2015.2886
   Shi SL, 2020, CLIN CANCER RES, V26, P5990, DOI 10.1158/1078-0432.CCR-20-0778
   Silva M, 2016, ONCOTARGET, V7, P41053, DOI 10.18632/oncotarget.9419
   Singh R, 2019, ELIFE, V8, DOI 10.7554/eLife.48916
   Stanley P., 2017, ESSENTIALS GLYCOBIOL
   Sumardika IW, 2018, ONCOL RES, V26, P431, DOI 10.3727/096504017X15031557924123
   Sweeney JG, 2018, NAT COMMUN, V9, DOI 10.1038/s41467-018-05795-0
   Takahashi M, 2009, CARBOHYD RES, V344, P1387, DOI 10.1016/j.carres.2009.04.031
   Tang L, 2019, MED ONCOL, V36, DOI 10.1007/s12032-019-1270-4
   Thies A, 2001, BRIT J CANCER, V84, P819, DOI 10.1054/bjoc.2000.1673
   Ugorski M, 2002, ACTA BIOCHIM POL, V49, P303
   Vajaria B, 2017, GLYCOCONJUGATE J, V34, P147, DOI 10.1007/s10719-016-9755-2
   Valiente M, 2014, CELL, V156, P1002, DOI 10.1016/j.cell.2014.01.040
   Wagner KW, 2007, NAT MED, V13, P1070, DOI 10.1038/nm1627
   Wang YN, 2020, J BIOMED SCI, V27, DOI 10.1186/s12929-020-00670-x
   Wang ZH, 2020, CELL MOL IMMUNOL, V17, P1148, DOI 10.1038/s41423-019-0327-9
   Xu CY, 2021, GLYCOCONJUGATE J, V38, P119, DOI 10.1007/s10719-020-09967-3
   Yang Q, 2016, J BIOL CHEM, V291, P11064, DOI 10.1074/jbc.M116.720789
   YOSHIMURA M, 1995, P NATL ACAD SCI USA, V92, P8754, DOI 10.1073/pnas.92.19.8754
   Yu LC, 2001, BLOOD, V98, P3840, DOI 10.1182/blood.V98.13.3840
   Zhao YY, 2008, FEBS J, V275, P1939, DOI 10.1111/j.1742-4658.2008.06346.x
NR 97
TC 1
Z9 1
U1 7
U2 9
PU MDPI
PI BASEL
PA ST ALBAN-ANLAGE 66, CH-4052 BASEL, SWITZERLAND
EI 2073-4409
J9 CELLS-BASEL
JI Cells
PD AUG
PY 2021
VL 10
IS 8
AR 2136
DI 10.3390/cells10082136
PG 16
WC Cell Biology
WE Science Citation Index Expanded (SCI-EXPANDED)
SC Cell Biology
GA UG1UP
UT WOS:000689046500001
PM 34440905
OA Green Published, gold
DA 2022-04-10
ER

PT J
AU Tan, J
   Wang, HL
   Yang, J
   Liu, QQ
   Li, CM
   Wang, YQ
   Fu, LN
   Gao, QY
   Chen, YX
   Fang, JY
AF Tan, Juan
   Wang, Hao-Lian
   Yang, Jie
   Liu, Qian-Qian
   Li, Chun-Min
   Wang, Yun-Qian
   Fu, Lin-Na
   Gao, Qin-Yan
   Chen, Ying-Xuan
   Fang, Jing-Yuan
TI JMJD2B-induced amino acid alterations enhance the survival of colorectal
   cancer cells under glucose-deprivation via autophagy
SO THERANOSTICS
LA English
DT Article
DE JMJD2B; CRC; amino acids metabolism; autophagy; LC3B
ID HISTONE DEMETHYLASE JMJD2B; dna damage RESPONSE; EPIGENETIC REGULATION;
   NUTRIENT DEPRIVATION; PROTEIN-SYNTHESIS; CYCLE ARREST; IN-VITRO;
   PROLIFERATION; APOPTOSIS; MELANOMA
AB Rationale: post-translational modification have emerged as vital players in alterations to tumor metabolism, including amino acid metabolic reprogramming. Jumonji domain-containing protein 2B (JMJD2B) enhances colorectal cancer (CRC) cell survival upon glucose deficiency. In the present study, we hypothesized that JMJD2B affects tumor cell amino acid metabolism in CRC and consequently promotes survival of CRC cells upon glucose deprivation.
   Methods: Non-target metabolic profiling was used to evaluate the roles of JMJD2B in CRC cell metabolism under glucose starvation. The roles of amino acid alterations induced by JMJD2B on CRC cell survival were determined by cell viability, immunoblotting, and clonogenic assays, and flow cytometry. The underlying mechanism by which JMJD2B affected CRC cell metabolism were assessed using immunofluorescence staining, chromatin immunoprecipitation assays, electron microscopy in CRC cell lines, and using xenograft models. The correlation between JMJD2B and LC3B expression in human CRC specimens was assessed using immunohistochemistry.
   Results: Profound metabolic reprogramming was detected in JMJD2B knockdown CRC cells under glucose deficiency, especially those involving amino acid metabolites. Silencing of JMJD2B reduced the levels of certain amino acids that were induced by glucose deficiency. Among these amino acids, asparagine (Asn), phenylalanine (Phe), and histidine (His) promoted CRC cell survival under glucose starvation when JMJD2B was knocked down. Mechanistically, downregulation of JMJD2B inhibited autophagy in CRC cells through epigenetic regulation of microtubule associated protein 1 light chain 3 beta (LC3B), and subsequently decreased intracellular amino acid (Asn, Phe, His) levels under glucose deprivation, thus suppressing the survival of CRC cells. Using a nude mouse xenograft model, we verified that inhibiting JMJD2B could decrease the levels of amino acids (Asn, Phe, His). In addition, the inhibitory effects of JMJD2B-knockdown on tumor growth and amino acids level were rescued by overexpression of LC3B. Furthermore, we observed that the high expression of LC3B was more likely detected in tissuses with high expression of JMJD2B (P < 0.001) in 60 human CRC tissues.
   Conclusion: These results indicated that JMJD2B sustained the intracellular amino acids derived from autophagy in CRC cells upon glucose deficiency, partly through epigenetic regulation of LC3B, thus driving the malignancy of CRC.
C1 [Tan, Juan; Wang, Hao-Lian; Liu, Qian-Qian; Li, Chun-Min; Wang, Yun-Qian; Fu, Lin-Na; Gao, Qin-Yan; Chen, Ying-Xuan; Fang, Jing-Yuan] Shanghai Jiao Tong Univ, State Key Lab Oncogenes & Related Genes, Key Lab Gastroenterol & Hepatol,Minist Hlth, Renji Hosp,Sch Med,Div Gastroenterol & Hepatol, 145 Middle Shandong Rd, Shanghai 200001, Peoples R China.
   [Tan, Juan; Wang, Hao-Lian; Liu, Qian-Qian; Li, Chun-Min; Wang, Yun-Qian; Fu, Lin-Na; Gao, Qin-Yan; Chen, Ying-Xuan; Fang, Jing-Yuan] Shanghai Inst Digest Dis, 145 Middle Shandong Rd, Shanghai 200001, Peoples R China.
   [Yang, Jie] Shanghai Jiao Tong Univ, Educ Minist Cell Differentiat & Apoptosis, Dept Biochem & Mol Cell Biol, Sch Med,Inst Med Sci,Key Lab, 280 South Chongqing Rd, Shanghai 200025, Peoples R China.
RP Chen, YX (corresponding author), 145 Middle Shandong Rd, Shanghai 200001, Peoples R China.
EM yingxuanchen71@sjtu.edu.cn
FU National Natural Science Foundation of ChinaNational Natural Science
[truncated: 4,547,521 more chars]
