# Supplementary material for: The Global research of protein post-translational modifications in the cancer field: A bibliometric and visualized study
Source: Frontiers journal article supplement (doi:10.3389/fonc.2022.978464), 2022-11-03
Supplement: Data_Sheet_1.zip [file Editorial 7.DOC]

FN Clarivate Analytics Web of Science
VR 1.0
PT J
AU Zhang, SY
   Zhou, TT
   Wang, Z
   Yi, F
   Li, CL
   Guo, WD
   Xu, HD
   Cui, HY
   Dong, X
   Liu, JW
   Song, XY
   Cao, L
AF Zhang, Siyi
   Zhou, Tingting
   Wang, Zhuo
   Yi, Fei
   Li, Chunlu
   Guo, Wendong
   Xu, Hongde
   Cui, Hongyan
   Dong, Xiang
   Liu, Jingwei
   Song, Xiaoyu
   Cao, Liu
TI post-translational modification of PCNA in Control of DNA Synthesis and
   DNA Damage Tolerance-the Implications in Carcinogenesis
SO INTERNATIONAL JOURNAL OF BIOLOGICAL SCIENCES
LA English
DT Review
DE replication; DDT; ubiquitination; phosphorylation; acetylation;
   SUMOylation; NEDDylation; ISGylation
ID CELL NUCLEAR ANTIGEN; HISTONE METHYLTRANSFERASE EZH2;
   UBIQUITIN-CONJUGATING ENZYMES; STALLED REPLICATION FORKS;
   POLYMERASE-ETA; TYROSINE PHOSPHORYLATION; HOMOLOGOUS RECOMBINATION;
   MONOUBIQUITINATED PCNA; COMPETITIVE INHIBITOR; SELECTIVE-INHIBITION
AB The faithful DNA replication is a critical event for cell survival and inheritance. However, exogenous or endogenous sources of damage challenge the accurate synthesis of DNA, which causes DNA lesions. The DNA lesions are obstacles for replication fork progression. However, the prolonged replication fork stalling leads to replication fork collapse, which may cause DNA double-strand breaks (DSB). In order to maintain genomic stability, eukaryotic cells evolve translesion synthesis (TLS) and template switching (TS) to resolve the replication stalling. Proliferating cell nuclear antigen (PCNA) trimer acts as a slide clamp and encircles DNA to orchestrate DNA synthesis and DNA damage tolerance (DDT). The post-translational modification (PTMs) of PCNA regulate these functions to ensure the appropriate initiation and termination of replication and DDT. The aberrant regulation of PCNA PTMs will result in DSB, which causes mutagenesis and poor response to chemotherapy. Here, we review the roles of the PCNA PTMs in DNA duplication and DDT. We propose that clarifying the regulation of PCNA PTMs may provide insights into understanding the development of cancers.
C1 [Zhang, Siyi; Zhou, Tingting; Wang, Zhuo; Yi, Fei; Li, Chunlu; Guo, Wendong; Xu, Hongde; Cui, Hongyan; Dong, Xiang; Liu, Jingwei; Song, Xiaoyu] China Med Univ, Inst Hlth Sci, Shenyang 110122, Liaoning, Peoples R China.
   [Cao, Liu] China Med Univ, Liaoning Prov Collaborat Innovat Ctr Aging Relate, Coll Basic Med Sci,Key Lab Med Cell Biol, Key Lab Cell Biol,Minist Publ Hlth,Minist Educ, Shenyang 110122, Liaoning, Peoples R China.
RP Song, XY; Cao, L (corresponding author), China Med Univ, Liaoning Prov Collaborat Innovat Ctr Aging Relate, Coll Basic Med Sci,Key Lab Med Cell Biol, Key Lab Cell Biol,Minist Publ Hlth,Minist Educ, Shenyang 110122, Liaoning, Peoples R China.
EM xysong@cmu.edu.cn; lcao@cmu.edu.cn
FU National Key R&D Program of China [2016YFC1302400]; National Natural
   Science Foundation of ChinaNational Natural Science Foundation of China
   (NSFC) [82030091, 81770001, Z18-4-021, 81502438, 81502414]; Ministry of
   Education Innovation Team Development Plan [IRT_17R107, IRT13101];
   Foundation of Liaoning Province of China [LFWK201725, QN2019039,
   QN2019038, LQNK201747]
FX We receive fundings from National Key R&D Program of China
   (2016YFC1302400) , National Natural Science Foundation of China
   (82030091, 81770001, and Z18-4-021) , and the Ministry of Education
   Innovation Team Development Plan (IRT_17R107&IRT13101) for L.C.;
   National Natural Science Foundation of China (81502438) for T.Z.,
   (81502414) for F.Y.; Foundation of Liaoning Province of China
   (LFWK201725) for X.S., (QN2019039) for T.Z., (QN2019038) for F.Y.,
   (LQNK201747) for Z.W.
CR Aggarwal M, 2011, P NATL ACAD SCI USA, V108, P1525, DOI 10.1073/pnas.1006423108
   ALLFREY VG, 1964, P NATL ACAD SCI USA, V51, P786, DOI 10.1073/pnas.51.5.786
   Alvarez V, 2016, SCI REP-UK, V6, DOI 10.1038/srep25513
   Apweiler R, 2004, NUCLEIC ACIDS RES, V32, pD115, DOI 10.1093/nar/gkh131
   Aygun O, 2008, P NATL ACAD SCI USA, V105, P8580, DOI 10.1073/pnas.0804424105
   Baatar S, 2020, ANN SURG ONCOL, V27, P4360, DOI 10.1245/s10434-020-08518-2
   Behrends C, 2011, NAT STRUCT MOL BIOL, V18, P520, DOI 10.1038/nsmb.2066
   Bienko M, 2005, SCIENCE, V310, P1821, DOI 10.1126/science.1120615
   Billon P, 2017, MOL CELL, V65, P78, DOI 10.1016/j.molcel.2016.10.033
   Blum G, 2014, ACS CHEM BIOL, V9, P2471, DOI 10.1021/cb500515r
   Bork P, 1997, FASEB J, V11, P68, DOI 10.1096/fasebj.11.1.9034168
   Bracken AP, 2003, EMBO J, V22, P5323, DOI 10.1093/emboj/cdg542
   Brown JS, 2015, CELL REP, V11, P704, DOI 10.1016/j.celrep.2015.03.058
   Butler KV, 2016, J MED CHEM, V59, P9881, DOI 10.1021/acs.jmedchem.6b01244
   Cao R, 2002, SCIENCE, V298, P1039, DOI 10.1126/science.1076997
   Cazzalini O, 2014, NUCLEIC ACIDS RES, V42, P8433, DOI 10.1093/nar/gku533
   CHAU V, 1989, SCIENCE, V243, P1576, DOI 10.1126/science.2538923
   Cho EA, 2003, MOL CELL BIOL, V23, P1666, DOI 10.1128/MCB.23.5.1666-1673.2003
   Chou DM, 2010, P NATL ACAD SCI USA, V107, P18475, DOI 10.1073/pnas.1012946107
   Cohen P, 2002, NAT CELL BIOL, V4, pE127, DOI 10.1038/ncb0502-e127
   Couture JF, 2005, GENE DEV, V19, P1455, DOI 10.1101/gad.1318405
   Czermin B, 2002, CELL, V111, P185, DOI 10.1016/S0092-8674(02)00975-3
   Da Silva-Ferrada E, 2016, INT J BIOCHEM CELL B, V79, P443, DOI 10.1016/j.biocel.2016.09.015
   Durando M, 2013, NUCLEIC ACIDS RES, V41, P3079, DOI 10.1093/nar/gkt016
   Dutta D, 2011, CELL, V146, P533, DOI 10.1016/j.cell.2011.07.034
   Fiskus W, 2009, BLOOD, V114, P2733, DOI 10.1182/blood-2009-03-213496
   FRENCH S, 1992, SCIENCE, V258, P1362, DOI 10.1126/science.1455232
   Gali H, 2012, NUCLEIC ACIDS RES, V40, P6049, DOI 10.1093/nar/gks256
   Gallego-Sanchez A, 2012, PLOS GENET, V8, DOI 10.1371/journal.pgen.1002826
   Garg P, 2005, P NATL ACAD SCI USA, V102, P18361, DOI 10.1073/pnas.0505949102
   Garg P, 2004, GENE DEV, V18, P2764, DOI 10.1101/gad.1252304
   Georgescu RE, 2014, NAT STRUCT MOL BIOL, V21, P664, DOI 10.1038/nsmb.2851
   Giannattasio M, 2014, NAT STRUCT MOL BIOL, V21, P884, DOI 10.1038/nsmb.2888
   Gil J, 2017, J PROTEOMICS, V150, P297, DOI 10.1016/j.jprot.2016.10.003
   Gohler T, 2008, DNA REPAIR, V7, P775, DOI 10.1016/j.dnarep.2008.02.001
   Gray MD, 1997, NAT GENET, V17, P100, DOI 10.1038/ng0997-100
   Gu W, 1997, CELL, V90, P595, DOI 10.1016/S0092-8674(00)80521-8
   Guan JH, 2018, PROTEIN CELL, V9, P365, DOI 10.1007/s13238-017-0455-x
   Hanway D, 2002, P NATL ACAD SCI USA, V99, P10605, DOI 10.1073/pnas.152264899
   Hayashi M, 2021, MOL CELL BIOL, V41, DOI 10.1128/MCB.00044-20
   Haynes B, 2020, BBA-MOL BASIS DIS, V1866, DOI 10.1016/j.bbadis.2019.165561
   Hecker CM, 2006, J BIOL CHEM, V281, P16117, DOI 10.1074/jbc.M512757200
   Hedglin M, 2019, J BIOL CHEM, V294, P5157, DOI 10.1074/jbc.RA118.005297
   Hendriks IA, 2015, NAT COMMUN, V6, DOI 10.1038/ncomms8289
   Hickey CM, 2012, NAT REV MOL CELL BIO, V13, P755, DOI 10.1038/nrm3478
   Hoege C, 2002, NATURE, V419, P135, DOI 10.1038/nature00991
   House NCM, 2014, FRONT GENET, V5, DOI 10.3389/fgene.2014.00296
   Hu Y, 2007, GENE DEV, V21, P3073, DOI 10.1101/gad.1609107
   Huang TT, 2006, NAT CELL BIOL, V8, P339, DOI 10.1038/ncb1378
   Hutcherson RJ, J BIOL CHEM, V2021
   Ikeda F, 2008, EMBO REP, V9, P536, DOI 10.1038/embor.2008.93
   Jimeno S, 2015, NUCLEIC ACIDS RES, V43, P987, DOI 10.1093/nar/gku1384
   JONSSON ZO, 1995, EMBO J, V14, P5745, DOI 10.1002/j.1460-2075.1995.tb00261.x
   Jorgensen S, 2007, J CELL BIOL, V179, P1337, DOI 10.1083/jcb.200706150
   Jowsey PA, 2004, J BIOL CHEM, V279, P55562, DOI 10.1074/jbc.M411021200
   Kamitani T, 1997, J BIOL CHEM, V272, P28557, DOI 10.1074/jbc.272.45.28557
   Kanagaraj R, 2010, NUCLEIC ACIDS RES, V38, P8131, DOI 10.1093/nar/gkq697
   Kannouche PL, 2004, MOL CELL, V14, P491, DOI 10.1016/S1097-2765(04)00259-X
   Kashiwaba S, 2015, CELL REP, V13, P2072, DOI 10.1016/j.celrep.2015.11.014
   Kim KI, 2004, MOL CELL BIOL, V24, P9592, DOI 10.1128/MCB.24.21.9592-9600.2004
   Kobayashi J, 2010, MECH AGEING DEV, V131, P436, DOI 10.1016/j.mad.2010.06.005
   KOKEN MHM, 1991, P NATL ACAD SCI USA, V88, P8865, DOI 10.1073/pnas.88.20.8865
   Kontopidis G, 2005, P NATL ACAD SCI USA, V102, P1871, DOI 10.1073/pnas.0406540102
   Kumar D, 2015, NUCLEIC ACIDS RES, V43, P5423, DOI 10.1093/nar/gkv431
   Kuzmichev A, 2002, GENE DEV, V16, P2893, DOI 10.1101/gad.1035902
   Lee KY, 2010, J BIOL CHEM, V285, P10362, DOI 10.1074/jbc.M109.092544
   LeRoith D, 2003, CANCER LETT, V195, P127, DOI 10.1016/S0304-3835(03)00159-9
   Lewis DA, 2010, ONCOGENE, V29, P1475, DOI 10.1038/onc.2009.440
   LHERNAULT SW, 1983, J CELL BIOL, V97, P258, DOI 10.1083/jcb.97.1.258
   Li F, 2018, ONCOL RES, V26, P1365, DOI 10.3727/096504018X15154085345907
   Li M, 2020, P NATL ACAD SCI USA, V117, P23588, DOI 10.1073/pnas.2004122117
   Li M, 2018, NAT COMMUN, V9, DOI 10.1038/s41467-018-05236-y
   Li M, 2011, MOL CELL BIOL, V31, P2090, DOI 10.1128/MCB.01137-10
   Li MJ, 2020, BIOCHEMISTRY-US, V59, P4694, DOI 10.1021/acs.biochem.0c00849
   Li P, 2020, ONCOL REP, V44, P213, DOI 10.3892/or.2020.7590
   Lim KS, 2018, MOL CELL, V72, P925, DOI 10.1016/j.molcel.2018.10.045
   Liu PD, 2018, SCI SIGNAL, V11, DOI 10.1126/scisignal.aar8133
   Lo YH, 2012, J BIOL CHEM, V287, P27148, DOI 10.1074/jbc.M112.388843
   Lue JK, 2019, CLIN CANCER RES, V25, P5271, DOI 10.1158/1078-0432.CCR-18-3989
   Lyakhovich A, 2004, ONCOGENE, V23, P3097, DOI 10.1038/sj.onc.1207449
   Ma AQ, 2014, J MED CHEM, V57, P6822, DOI 10.1021/jm500871s
   Ma T, 2013, MOL CELL, V49, P897, DOI 10.1016/j.molcel.2013.01.006
   Maga G, 2002, J BIOL CHEM, V277, P48434, DOI 10.1074/jbc.M206889200
   Masuda Y, 2019, J BIOL CHEM, V294, P4177, DOI 10.1074/jbc.RA118.005167
   Mohiuddin, 2016, DNA REPAIR, V40, P67, DOI 10.1016/j.dnarep.2016.02.002
   Moldovan GL, 2007, CELL, V129, P665, DOI 10.1016/j.cell.2007.05.003
   Moldovan GL, 2012, MOL CELL, V45, P75, DOI 10.1016/j.molcel.2011.11.010
   Motegi A, 2008, P NATL ACAD SCI USA, V105, P12411, DOI 10.1073/pnas.0805685105
   Mun MJ, 2016, J NEUROL SCI, V364, P122, DOI 10.1016/j.jns.2016.03.023
   Narita T, 2019, NAT REV MOL CELL BIO, V20, P156, DOI 10.1038/s41580-018-0081-3
   Naryzhny SN, 2004, J BIOL CHEM, V279, P20194, DOI 10.1074/jbc.M312850200
   Nikolova T, 2010, DNA REPAIR, V9, P1050, DOI 10.1016/j.dnarep.2010.07.005
   Northam MR, 2006, EMBO J, V25, P4316, DOI 10.1038/sj.emboj.7601320
   Park JM, 2014, MOL CELL, V54, P626, DOI 10.1016/j.molcel.2014.03.031
   Parker JL, 2012, NUCLEIC ACIDS RES, V40, P11380, DOI 10.1093/nar/gks892
   Pence MG, 2009, J BIOL CHEM, V284, P1732, DOI 10.1074/jbc.M807296200
   Peng A, 2018, EPIGENET CHROMATIN, V11, DOI 10.1186/s13072-018-0213-1
   Burkovics P, 2013, EMBO J, V32, P742, DOI 10.1038/emboj.2013.9
   Pfander B, 2005, NATURE, V436, P428, DOI 10.1038/nature03665
   PHILLIPS DM, 1963, BIOCHEM J, V87, P258, DOI 10.1042/bj0870258
   Poli J, 2017, PHILOS T R SOC B, V372, DOI 10.1098/rstb.2016.0290
   PROSPERI E, 1993, EXP CELL RES, V205, P320, DOI 10.1006/excr.1993.1092
   PROSPERI E, 1994, EXP CELL RES, V215, P257, DOI 10.1006/excr.1994.1341
   Puppe J, 2019, CLIN CANCER RES, V25, P4351, DOI 10.1158/1078-0432.CCR-18-4024
   Pursell ZF, 2007, SCIENCE, V317, P127, DOI 10.1126/science.1144067
   Qi W, 2012, P NATL ACAD SCI USA, V109, P21360, DOI 10.1073/pnas.1210371110
   Qian J, 2015, ONCOGENE, V34, P4791, DOI 10.1038/onc.2014.394
   Rondinelli B, 2017, NAT CELL BIOL, V19, P1371, DOI 10.1038/ncb3626
   Roskoski R, 2019, PHARMACOL RES, V144, P19, DOI 10.1016/j.phrs.2019.03.006
   Saadat N, 2018, MOL CANCER THER, V17, P2586, DOI 10.1158/1535-7163.MCT-18-0364
   Sakamoto S, 2001, GENES CELLS, V6, P421, DOI 10.1046/j.1365-2443.2001.00433.x
   Sanders MA, 2013, MOL CANCER THER, V12, P373, DOI 10.1158/1535-7163.MCT-12-0793
   Seeler JS, 2017, NAT REV CANCER, V17, P184, DOI 10.1038/nrc.2016.143
   Shimizu K, 2001, MOL CELL BIOL, V21, P3901, DOI 10.1128/MCB.21.12.3901-3912.2001
   Sigismund S, 2004, CURR TOP MICROBIOL, V286, P149
   Sinha M, 2009, CELL, V138, P1109, DOI 10.1016/j.cell.2009.07.013
   Somasagara RR, 2017, ONCOGENE, V36, P6680, DOI 10.1038/onc.2017.279
   Somasagara RR, 2016, BIOCHEM BIOPH RES CO, V469, P449, DOI 10.1016/j.bbrc.2015.11.134
   Sommers JA, 2019, PLOS ONE, V14, DOI 10.1371/journal.pone.0210525
   Song J, 2004, P NATL ACAD SCI USA, V101, P14373, DOI 10.1073/pnas.0403498101
   STERNER R, 1979, J BIOL CHEM, V254, P1577
   Takawa M, 2012, CANCER RES, V72, P3217, DOI 10.1158/0008-5472.CAN-11-3701
   Tonzi P, 2018, ELIFE, V7, DOI 10.7554/eLife.41426
   Ulrich HD, 2000, EMBO J, V19, P3388, DOI 10.1093/emboj/19.13.3388
   Varambally S, 2002, NATURE, V419, P624, DOI 10.1038/nature01075
   Vaswani RG, 2016, J MED CHEM, V59, P9928, DOI 10.1021/acs.jmedchem.6b01315
   Veschi V, 2017, CANCER CELL, V31, P50, DOI 10.1016/j.ccell.2016.12.002
   Villafanez F, 2019, ONCOGENE, V38, P4310, DOI 10.1038/s41388-019-0724-7
   Villarroya-Beltri C, 2017, J CELL SCI, V130, P2961, DOI 10.1242/jcs.205468
   Wada M, 2020, BIOMOLECULES, V10, DOI 10.3390/biom10121686
   Wang SC, 2006, NAT CELL BIOL, V8, P1359, DOI 10.1038/ncb1501
   Waraky A, 2017, J BIOL CHEM, V292, P18227, DOI 10.1074/jbc.M117.781492
   Warbrick E, 1998, BIOESSAYS, V20, P195, DOI 10.1002/(SICI)1521-1878(199803)20:3<195::AID-BIES2>3.0.CO;2-R
   Watanabe K, 2004, EMBO J, V23, P3886, DOI 10.1038/sj.emboj.7600383
   Williams DE, 2013, ORG LETT, V15, P414, DOI 10.1021/ol303416k
   Windheim M, 2008, BIOCHEM J, V409, P723, DOI 10.1042/BJ20071338
   Wong JJY, 2006, P NATL ACAD SCI USA, V103, P10735, DOI 10.1073/pnas.0600397103
   Wong RPC, 2012, PIGM CELL MELANOMA R, V25, DOI 10.1111/j.1755-148X.2011.00948.x
   Wu B, 2019, BIOMED PHARMACOTHER, V112, DOI 10.1016/j.biopha.2019.01.016
   Wu P, 2015, TRENDS PHARMACOL SCI, V36, P422, DOI 10.1016/j.tips.2015.04.005
   Xie C, 2019, J CELL PHYSIOL, V234, P21100, DOI 10.1002/jcp.28713
   Xie C, 2014, BIOCHEM BIOPH RES CO, V445, P263, DOI 10.1016/j.bbrc.2014.02.003
   Xin H, 2000, NUCLEIC ACIDS RES, V28, P2847, DOI 10.1093/nar/28.14.2847
   Xu BW, 2015, BLOOD, V125, P346, DOI 10.1182/blood-2014-06-581082
   Yang C, 2020, PLOS ONE, V15, DOI 10.1371/journal.pone.0236291
   Yang YP, 2018, ONCOtarget THER, V11, P8455, DOI 10.2147/OTT.S186498
   Yu CE, 1997, AM J HUM GENET, V60, P330
   Yu Y, 2009, J BIOL CHEM, V284, P19310, DOI 10.1074/jbc.M109.015289
   Yu YL, 2013, PLOS ONE, V8, DOI 10.1371/journal.pone.0061362
   Yuan WM, 2001, EMBO J, V20, P362, DOI 10.1093/emboj/20.3.362
   Zhang SF, 2008, CELL CYCLE, V7, P3399, DOI 10.4161/cc.7.21.6949
   Zhang YB, 2001, NUCLEIC ACIDS RES, V29, P928, DOI 10.1093/nar/29.4.928
   Zhao C, 2004, P NATL ACAD SCI USA, V101, P7578, DOI 10.1073/pnas.0402528101
   Zhao H, 2014, ONCOGENE, V33, P1429, DOI 10.1038/onc.2013.84
   Zhao HJ, 2011, MOL CANCER THER, V10, P29, DOI 10.1158/1535-7163.MCT-10-0778
   Zou ST, 2018, CANCER LETT, V417, P65, DOI 10.1016/j.canlet.2017.12.034
   Zou WG, 2006, J BIOL CHEM, V281, P3989, DOI 10.1074/jbc.M510787200
   Zou Y, 2006, J CELL PHYSIOL, V208, P267, DOI 10.1002/jcp.20622
NR 158
TC 0
Z9 0
U1 8
U2 8
PU IVYSPRING INT PUBL
PI LAKE HAVEN
PA PO BOX 4546, LAKE HAVEN, NSW 2263, AUSTRALIA
SN 1449-2288
J9 INT J BIOL SCI
JI Int. J. Biol. Sci.
PY 2021
VL 17
IS 14
BP 4047
EP 4059
DI 10.7150/ijbs.64628
PG 13
WC Biochemistry & Molecular Biology; Biology
WE Science Citation Index Expanded (SCI-EXPANDED)
SC Biochemistry & Molecular Biology; Life Sciences & Biomedicine - Other
   Topics
GA WN3UY
UT WOS:000711698200012
PM 34671219
OA Green Published, gold
DA 2022-04-10
ER

PT J
AU Kagan, J
   Moritz, RL
   Mazurchuk, R
   Lee, JH
   Kharchenko, PV
   Rozenblatt-Rosen, O
   Ruppin, E
   Edfors, F
   Ginty, F
   Goltsev, Y
   Wells, JA
   LaCava, J
   Riesterer, JL
   Germain, RN
   Shi, TJ
   Chee, MS
   Budnik, BA
   Yates, III
   Chait, BT
   Moffitt, JR
   Smith, RD
   Srivastava, S
AF Kagan, Jacob
   Moritz, Robert L.
   Mazurchuk, Richard
   Lee, Je Hyuk
   Kharchenko, Peter Vasili
   Rozenblatt-Rosen, Orit
   Ruppin, Eytan
   Edfors, Fredrik
   Ginty, Fiona
   Goltsev, Yury
   Wells, James A.
   LaCava, John
   Riesterer, Jessica L.
   Germain, Ronald N.
   Shi, Tujin
   Chee, Mark S.
   Budnik, Bogdan A.
   Yates, John R., III
   Chait, Brian T.
   Moffitt, Jeffery R.
   Smith, Richard D.
   Srivastava, Sudhir
TI National Cancer Institute Think-Tank Meeting Report on Proteomic
   Cartography and biomarkerss at the Single-Cell Level: Interrogation of
   Premalignant Lesions
SO JOURNAL OF PROTEOME RESEARCH
LA English
DT Article
DE single-cell proteomics; single-cell mass spectrometry; targeted
   proteomics; precursor lesion; precancer; tumorigenic lesion; lesion's
   heterogeneity; clonal evolution; spatial and temporal cartography;
   biomarkerss; early detection; target for prevention and therapy
ID ION MOBILITY SEPARATIONS; PATH-LENGTH STRUCTURES; breast cancer;
   NANOELECTROSPRAY IONIZATION; LIQUID-CHROMATOGRAPHY; MUTATIONAL
   PROCESSES; mass spectrometry; HETEROGENEITY; EFFICIENCY; SENSITIVITY
AB A Think-Tank Meeting was convened by the National Cancer Institute (NCI) to solicit experts' opinion on the development and application of multiomic single-cell analyses, and especially single-cell proteomics, to improve the development of a new generation of biomarkerss for cancer risk, early detection, diagnosis, and prognosis as well as to discuss the discovery of new target for prevention and therapy. It is anticipated that such markers and target will be based on cellular, subcellular, molecular, and functional aberrations within the lesion and within individual cells. Single-cell proteomic data will be essential for the establishment of new tools with searchable and scalable features that indude spatial and temporal cartographies of premalignant and malignant lesions. Challenges and potential solutions that were discussed included (i) The best way/s to analyze single-cells from fresh and preserved tissue; (ii) Detection and analysis of secreted molecules and from single cells, especially from a tissue slice; (iii) Detection of new, previously undocumented cell type/s in the premalignant and early stage cancer tissue microenvironment; (iv) Multiomic integration of data to support and inform proteomic measurements; (v) Subcellular organelles-identifying abnormal structure, function, distribution, and location within individual premalignant and malignant cells; (vi) How to improve the dynamic range of single-cell proteomic measurements for discovery of differentially expressed proteins and their post-translational modification (PTM); (vii) The depth of coverage measured concurrently using single-cell techniques; (viii) Quantitation - absolute or semiquantitative? (ix) Single methodology or multiplexed combinations? (x) Application of analytical methods for identification of biologically significant subsets; (xi) Data visualization of N-dimensional data sets; (xii) How to construct intercellular signaling networks in individual cells within premalignant tumor microenvironments (TME); (xiii) Associations between intrinsic cellular processes and extrinsic stimuli; (xiv) How to predict cellular responses to stress-inducing stimuli; (xv) Identification of new markers for prediction of progression from precursor, benign, and localized lesions to invasive cancer, based on spatial and temporal changes within individual cells; (xvi) Identification of new target for immunoprevention or immunotherapy-identification of neoantigens and surfactome of individual cells within a lesion.
C1 [Kagan, Jacob; Mazurchuk, Richard; Srivastava, Sudhir] NCI, Canc biomarkerss Res Grp, Div Canc Prevent, Bethesda, MD 20892 USA.
   [Moritz, Robert L.] Inst Syst Biol, Seattle, WA 98109 USA.
   [Lee, Je Hyuk] Cold Spring Harbor Lab, POB 100, Cold Spring Harbor, NY 11724 USA.
   [Kharchenko, Peter Vasili] Harvard Med Sch, Blavatn Inst Biomed Informat, Boston, MA 02115 USA.
   [Rozenblatt-Rosen, Orit] Broad Inst, Klarman Cell Observ, Boston, MA USA.
   [Ruppin, Eytan] NCI, Canc Data Sci Lab, Ctr Canc Res, Bethesda, MD 20892 USA.
   [Edfors, Fredrik] KTH Royal Inst Technol, Sci Life Lab, SE-17121 Stockholm, Sweden.
   [Ginty, Fiona] GE Global Res Ctr, Life Sci & Mol Diagnost Lab, Niskayuna, NY USA.
   [Goltsev, Yury] Stanford Univ, Stanford Med Sch, Dept Microbiol & Immunol, Baxter Lab Stem Cell Biol, Stanford, CA 94305 USA.
   [Wells, James A.] Univ Calif San Francisco, Dept Pharmaceut Sci, San Francisco, CA 94143 USA.
   [LaCava, John] Rockefeller Univ, Lab Cellular & Struct Biol, 1230 York Ave, New York, NY 10021 USA.
   [Riesterer, Jessica L.] Oregon Hlth & Sci Univ, Ctr Spatial Syst Biomed, Portland, OR 97201 USA.
   [Germain, Ronald N.] NIAID, Lab Immune Syst Biol, NIH, 9000 Rockville Pike, Bethesda, MD 20892 USA.
   [Shi, Tujin; Smith, Richard D.] Pacific Northwest Natl Lab, Biol Sci Div, Richland, WA 99352 USA.
   [Chee, Mark S.] Encodia Inc, San Diego, CA USA.
   [Budnik, Bogdan A.] Harvard Univ, Fac Arts & Sci, Div Sci, Boston, MA 02115 USA.
   [Yates, John R., III] Scripps Res Inst, Dept Mol Med, La Jolla, CA USA.
   [Chait, Brian T.] Rockefeller Univ, Lab Mass Spectrometry & Gaseous Ion Chem, 1230 York Ave, New York, NY 10021 USA.
   [Moffitt, Jeffery R.] Boston Childrens Hosp, Boston, MA USA.
   [Moffitt, Jeffery R.] Harvard Univ, Med Sch, Boston, MA 02115 USA.
RP Kagan, J (corresponding author), NCI, Canc biomarkerss Res Grp, Div Canc Prevent, Bethesda, MD 20892 USA.; Moritz, RL (corresponding author), Inst Syst Biol, Seattle, WA 98109 USA.
EM kaganj@nih.go; Robert.Moritz@systemsbiology.org
RI Edfors, Fredrik/ABA-4429-2021; Germain, Ronald/ABE-7090-2020; Smith,
   Richard D/J-3664-2012; Budnik, Bogdan/AGG-8824-2022; LaCava,
   John/H-2840-2013
OI Edfors, Fredrik/0000-0002-0017-7987; Smith, Richard
   D/0000-0002-2381-2349; Budnik, Bogdan/0000-0003-3622-2003; LaCava,
   John/0000-0002-6307-7713; Ginty, Fiona/0000-0001-6638-683X
FU NCI NIH HHSUnited States Department of Health & Human ServicesNational
   Institutes of Health (NIH) - USANIH National Cancer Institute (NCI) [R01
   CA208179] Funding Source: Medline
CR Alexandrov LB, 2013, NATURE, V500, P415, DOI 10.1038/nature12477
   Alexandrov LB, 2013, CELL REP, V3, P246, DOI 10.1016/j.celrep.2012.12.008
   Angelo M, 2014, NAT MED, V20, P436, DOI 10.1038/nm.3488
   Bagaria SP, 2014, JAMA SURG, V149, P125, DOI 10.1001/jamasurg.2013.3181
   Bailey MH, 2018, CELL, V173, P371, DOI [10.1016/j.cell.2018.02.060, 10.1016/j.cell.2018.07.034]
   Barkas N, 2019, NAT METHODS, V16, P695, DOI 10.1038/s41592-019-0466-z
   Baslan T, 2017, NAT REV CANCER, V17, P557, DOI 10.1038/nrc.2017.58
   Bendall SC, 2012, TRENDS IMMUNOL, V33, P323, DOI 10.1016/j.it.2012.02.010
   Budnik B, 2018, GENOME BIOL, V19, DOI 10.1186/s13059-018-1547-5
   Buettner F, 2015, NAT BIOTECHNOL, V33, P155, DOI 10.1038/nbt.3102
   Chapman AM, 2016, LUNG CANCER, V102, P122, DOI 10.1016/j.lungcan.2016.10.010
   Chen KH, 2015, SCIENCE, V348, DOI 10.1126/science.aaa6090
   Cong YZ, 2020, ANAL CHEM, V92, P2665, DOI 10.1021/acs.analchem.9b04631
   Cox JT, 2014, J AM SOC MASS SPECTR, V25, P2028, DOI 10.1007/s13361-014-0856-5
   Cox JT, 2014, ANAL CHEM, V86, P9504, DOI 10.1021/ac502767y
   Das Sahu A, 2019, MOL SYST BIOL, V15, DOI 10.15252/msb.20188323
   Deng LL, 2017, ANAL CHEM, V89, P4628, DOI 10.1021/acs.analchem.7b00185
   Deng LL, 2016, CHEMISTRYSELECT, V1, P2396, DOI 10.1002/slct.201600460
   Deng LL, 2016, ANAL CHEM, V88, P8957, DOI 10.1021/acs.analchem.6b01915
   Dou MW, 2019, ANAL CHEM, V91, P13119, DOI 10.1021/acs.analchem.9b03349
   Dou MW, 2019, ANAL BIOANAL CHEM, V411, P5363, DOI 10.1007/s00216-018-1452-5
   Fereidouni F, 2017, NAT BIOMED ENG, V1, P957, DOI 10.1038/s41551-017-0165-y
   Gerdes MJ, 2018, MODERN PATHOL, V31, P406, DOI 10.1038/modpathol.2017.143
   Gerdes MJ, 2013, P NATL ACAD SCI USA, V110, P11982, DOI 10.1073/pnas.1300136110
   Gerner MY, 2012, IMMUNITY, V37, P364, DOI 10.1016/j.immuni.2012.07.011
   Goltsev Y, 2018, CELL, V174, P968, DOI 10.1016/j.cell.2018.07.010
   Graf JF, 2017, PLOS ONE, V12, DOI 10.1371/journal.pone.0188878
   Haber AL, 2017, NATURE, V551, P333, DOI 10.1038/nature24489
   Hirata E, 2017, CSH PERSPECT MED, V7, DOI 10.1101/cshperspect.a026781
   Hwang B, 2018, EXP MOL MED, V50, DOI 10.1038/s12276-018-0071-8
   Ibba M, 2000, ANNU REV BIOCHEM, V69, P617, DOI 10.1146/annurev.biochem.69.1.617
   Jabbour E, 2016, AM J HEMATOL, V91, P253, DOI 10.1002/ajh.24275
   Jackson HW, 2020, NATURE, V578, P615, DOI 10.1038/s41586-019-1876-x
   Jamaspishvili T, 2018, NAT REV UROL, V15, P222, DOI 10.1038/nrurol.2018.9
   Jerby-Arnon L, 2018, CELL, V175, P984, DOI 10.1016/j.cell.2018.09.006
   Jiang H, 2019, BIO-PROTOCOL, V9, DOI 10.21769/BioProtoc.3200
   Kozlov IA, 2012, PLOS ONE, V7, DOI 10.1371/journal.pone.0037441
   Kukreja M, 2015, CHEM BIOL, V22, P1122, DOI 10.1016/j.chembiol.2015.07.008
   Kurtulus S, 2019, IMMUNITY, V50, P181, DOI 10.1016/j.immuni.2018.11.014
   LaCava J, 2016, JOVE-J VIS EXP, DOI 10.3791/54518(2016)
   Lake BB, 2018, NAT BIOTECHNOL, V36, P70, DOI 10.1038/nbt.4038
   Lander ES, 2001, NATURE, V409, P860, DOI 10.1038/35057062
   Lee J. H., 2017, WILEY INTERDISCIP RE, V9
   Lee JH, 2015, NAT PROTOC, V10, DOI 10.1038/nprot.2014.191
   Leung KK, 2019, P NATL ACAD SCI USA, V116, P695, DOI 10.1073/pnas.1813666116
   Li WZ, 2019, NAT PROTOC, V14, P1708, DOI 10.1038/s41596-019-0156-4
   Li WZ, 2017, P NATL ACAD SCI USA, V114, pE7321, DOI 10.1073/pnas.1708981114
   Li Y, 2018, ONCOTARGET, V9, P2158, DOI 10.18632/oncotarget.23187
   LOFTFIELD RB, 1972, BIOCHEM J, V128, P1353, DOI 10.1042/bj1281353
   Lopez CS, 2017, METHOD CELL BIOL, V140, P149, DOI 10.1016/bs.mcb.2017.03.008
   Lundberg E, 2019, NAT REV MOL CELL BIO, V20, P285, DOI 10.1038/s41580-018-0094-y
   Luo QZ, 2006, J PROTEOME RES, V5, P1091, DOI 10.1021/pr050424y
   Ma YH, 2018, EXPERT REV PROTEOMIC, V15, P545, DOI 10.1080/14789450.2018.1500902
   Ma YH, 2018, NAT PROTOC, V13, P1744, DOI 10.1038/s41596-018-0012-y
   Marginean I, 2010, ANAL CHEM, V82, P9344, DOI 10.1021/ac1019123
   Marioni JC, 2017, ANNU REV CELL DEV BI, V33, P537, DOI 10.1146/annurev-cellbio-100616-060818
   Marquardt JU, 2015, NAT REV CANCER, V15, P653, DOI 10.1038/nrc4017
   Martinko AJ, 2018, ELIFE, V7, DOI 10.7554/eLife.31098
   Marx V, 2019, NAT METHODS, V16, P809, DOI 10.1038/s41592-019-0540-6
   McClatchy DB, 2015, J PROTEOME RES, V14, P4815, DOI 10.1021/acs.jproteome.5b00653
   McGranahan N, 2017, CELL, V168, P613, DOI 10.1016/j.cell.2017.01.018
   Mertens F, 2015, NAT REV CANCER, V15, P371, DOI 10.1038/nrc3947
   Mertins P, 2018, NAT PROTOC, V13, P1632, DOI 10.1038/s41596-018-0006-9
   Mincarelli L, 2018, PROTEOMICS, V18, DOI 10.1002/pmic.201700312
   Moffitt JR, 2018, SCIENCE, V362, P792, DOI 10.1126/science.aau5324
   Paolillo C, 2019, CLIN CHEM, V65, P972, DOI 10.1373/clinchem.2017.283895
   Penault-Llorca F, 2012, ANN ONCOL, V23, P19, DOI 10.1093/annonc/mds190
   Pollock SB, 2018, P NATL ACAD SCI USA, V115, P2836, DOI 10.1073/pnas.1721899115
   Puram SV, 2017, CELL, V171, P1611, DOI 10.1016/j.cell.2017.10.044
   Rajan A, 2019, J IMMUNOTHER CANCER, V7, DOI 10.1186/s40425-019-0723-9
   Rauniyar N, 2014, J PROTEOME RES, V13, P5293, DOI 10.1021/pr500880b
   Regev A, 2017, ELIFE, V6, DOI 10.7554/eLife.27041
   Reinders J, 2005, PROTEOMICS, V5, P4052, DOI 10.1002/pmic.200401289
   Rozenblatt-Rosen O, 2017, NATURE, V550, P451, DOI 10.1038/550451a
   Saltz J, 2018, CELL REP, V23, P181, DOI 10.1016/j.celrep.2018.03.086
   Schiapparelli LM, 2014, J PROTEOME RES, V13, P3966, DOI 10.1021/pr5002862
   Schulz D, 2018, CELL SYST, V6, P531, DOI 10.1016/j.cels.2018.04.004
   Schweppe DK, 2020, J PROTEOME RES, V19, P554, DOI 10.1021/acs.jproteome.9b00759
   Schweppe DK, 2019, ANAL CHEM, V91, P4010, DOI 10.1021/acs.analchem.8b05399
   Shen Y, 2004, ANAL CHEM, V76, P144, DOI 10.1021/ac030096q
   Shen YF, 2003, ANAL CHEM, V75, P3596, DOI 10.1021/ac0300690
   Shen YF, 2002, ANAL CHEM, V74, P4235, DOI 10.1021/ac0202280
   Shi TJ, 2018, COMMUN BIOL, V1, DOI 10.1038/s42003-018-0107-6
   Shi TJ, 2012, PROTEOMICS, V12, P1074, DOI 10.1002/pmic.201100436
   Sjostedt E, 2018, J PROTEOME RES, V17, P4127, DOI 10.1021/acs.jproteome.8b00406
   Sood A, 2016, JCI INSIGHT, V1, DOI 10.1172/jci.insight.87030
   Spagnolo DM, 2017, CANCER RES, V77, pE71, DOI 10.1158/0008-5472.CAN-17-0676
   Spitzer MH, 2017, CELL, V168, P487, DOI 10.1016/j.cell.2016.12.022
   Spitzer MH, 2016, CELL, V165, P780, DOI 10.1016/j.cell.2016.04.019
   Srivastava S, 2018, TRENDS CANCER, V4, P523, DOI 10.1016/j.trecan.2018.06.007
   Stubbington MJT, 2017, SCIENCE, V358, P58, DOI 10.1126/science.aan6828
   Sun LL, 2013, ANGEW CHEM INT EDIT, V52, P13661, DOI 10.1002/anie.201308139
   Swaminathan J, 2018, NAT BIOTECHNOL, V36, P1076, DOI 10.1038/nbt.4278
   Tan CS, 2015, LANCET ONCOL, V16, pE447, DOI 10.1016/S1470-2045(15)00246-6
   Tanay A, 2017, NATURE, V541, P331, DOI 10.1038/nature21350
   Tang FC, 2009, NAT METHODS, V6, P377, DOI [10.1038/NMETH.1315, 10.1038/nmeth.1315]
   Taylor MS, 2018, ELIFE, V7, DOI 10.7554/eLife.30094
   Thul PJ, 2018, PROTEIN SCI, V27, P233, DOI 10.1002/pro.3307
   Thul PJ, 2017, SCIENCE, V356, DOI 10.1126/science.aal3321
   Uhlen M, 2017, SCIENCE, V357, P660, DOI 10.1126/science.aan2507
   Velmeshev D, 2019, SCIENCE, V364, P685, DOI 10.1126/science.aav8130
   Vogelstein B, 2013, SCIENCE, V339, P1546, DOI 10.1126/science.1235122
   Wagner J, 2019, CELL, V177, P1330, DOI 10.1016/j.cell.2019.03.005
   Wang DX, 2019, MOL SYST BIOL, V15, DOI 10.15252/msb.20188503
   Wang J, 2017, MOL CELL PROTEOMICS, V16, P121, DOI 10.1074/mcp.M116.060301
   Wang X, 2018, SCIENCE, V361, DOI [10.1126/science.aat5691, 10.1126/science.aav3932]
   Wang Y, 2015, MOL CELL, V58, P598, DOI 10.1016/j.molcel.2015.05.005
   Wargo JA, 2016, CURR OPIN IMMUNOL, V41, P23, DOI 10.1016/j.coi.2016.05.006
   Yan YY, 2019, PLOS ONE, V14, DOI 10.1371/journal.pone.0216485
   Yates LR, 2017, CANCER CELL, V32, P169, DOI 10.1016/j.ccell.2017.07.005
   Yi L, 2019, ANAL CHEM, V91, P5794, DOI 10.1021/acs.analchem.9b00024
   Zhang PF, 2019, ANAL CHEM, V91, P1441, DOI 10.1021/acs.analchem.8b04258
   Zheng Y, 2017, NAT COMMUN, V8, DOI 10.1038/ncomms14344
   Zhou F, 2012, ANAL CHEM, V84, P5133, DOI 10.1021/ac2031404
   Zhu SB, 2017, ONCOTARGET, V8, P53763, DOI 10.18632/oncotarget.17893
   Zhu Y, 2018, ANGEW CHEM INT EDIT, V57, P12370, DOI 10.1002/anie.201802843
   Zhu Y, 2018, NAT COMMUN, V9, DOI 10.1038/s41467-018-03367-w
NR 117
TC 4
Z9 4
U1 5
U2 22
PU AMER CHEMICAL SOC
PI WASHINGTON
PA 1155 16TH ST, NW, WASHINGTON, DC 20036 USA
SN 1535-3893
EI 1535-3907
J9 J PROTEOME RES
JI J. Proteome Res.
PD MAY 1
PY 2020
VL 19
IS 5
BP 1900
EP 1912
DI 10.1021/acs.jproteome.0c00021
PG 13
WC Biochemical Research Methods
WE Science Citation Index Expanded (SCI-EXPANDED)
SC Biochemistry & Molecular Biology
GA LJ3RH
UT WOS:000530084700003
PM 32163288
OA Green Submitted
DA 2022-04-10
ER

PT J
AU Long, XJ
   Zhao, BY
   Lu, WB
   Chen, X
   Yang, XY
   Huang, JF
   Zhang, YH
   An, SM
   Qin, YY
   Xing, ZC
   Shen, YJ
   Wu, HM
   Qi, YT
AF Long, Xiaojun
   Zhao, Biying
   Lu, Wenbin
   Chen, Xu
   Yang, Xinyi
   Huang, Jifang
   Zhang, Yuhong
   An, Siming
   Qin, Yuanyuan
   Xing, Zhengcao
   Shen, Yajie
   Wu, Hongmei
   Qi, Yitao
TI The Critical Roles of the SUMO-Specific Protease SENP3 in Human Diseases
   and Clinical Implications
SO FRONTIERS IN PHYSIOLOGY
LA English
DT Review
DE SUMOylation; SENP3; cancer; neurological disease; cardiovascular disease
ID BLOOD-TESTIS BARRIER; NEUROVASCULAR UNIT; MESENCHYMAL TRANSITION;
   ISOPEPTIDASE SENP3; ubiquitinationLIGASE; DE-SUMOYLATION; BRAIN-INJURY;
   EXPRESSION; PROTEINS; DESUMOYLATION
AB Post-translational modification by sumoylation(small ubiquitin-like modifier) proteins has been shown to regulate a variety of functions of proteins, including protein stability, chromatin organization, transcription, DNA repair, subcellular localization, protein-protein interaction, and protein homeostasis. SENP (sentrin/SUMO-specific protease) regulates precursor processing and deconjugation of sumoylationto control cellular mechanism. SENP3, which is one of the SENP family members, deconjugates target proteins to alter protein modification. The effect of modification via sumoylationand SENP3 is crucial to maintain the balance of SUMOylation and guarantee normal protein function and cellular activities. SENP3 acts as an oxidative stress-responsive molecule under physiological conditions. Under pathological conditions, if the SUMOylation process of proteins is affected by variations in SENP3 levels, it will cause a cellular reaction and ultimately lead to abnormal cellular activities and the occurrence and development of human diseases, including cardiovascular diseases, neurological diseases, and various cancers. In this review, we summarized the most recent advances concerning the critical roles of SENP3 in normal physiological and pathological conditions as well as the potential clinical implications in various diseases. Targeting SENP3 alone or in combination with current therapies might provide powerful targeted therapeutic strategies for the treatment of these diseases.
C1 [Long, Xiaojun; Zhao, Biying; Lu, Wenbin; Chen, Xu; Yang, Xinyi; Huang, Jifang; Zhang, Yuhong; An, Siming; Qin, Yuanyuan; Xing, Zhengcao; Shen, Yajie; Wu, Hongmei; Qi, Yitao] Shaanxi Normal Univ, Natl Engn Lab Resource Developing Endangered Chin, Minist Educ Med Resources & Nat Pharmaceut Chem, Key Lab,Coll Life Sci, Xian, Peoples R China.
RP Wu, HM; Qi, YT (corresponding author), Shaanxi Normal Univ, Natl Engn Lab Resource Developing Endangered Chin, Minist Educ Med Resources & Nat Pharmaceut Chem, Key Lab,Coll Life Sci, Xian, Peoples R China.
EM hq8479@snnu.edu.cn; qiyitao@snnu.edu.cn
FU National Natural Science Foundation of ChinaNational Natural Science
   Foundation of China (NSFC) [81671294, 81870241]; Fundamental Research
   Funds for the Central UniversitiesFundamental Research Funds for the
   Central Universities [GK201903066, 2018CSLY016, 2018CSLY015]
FX This work was supported by the National Natural Science Foundation of
   China (81671294 and 81870241 to YTQ), and the Fundamental Research Funds
   for the Central Universities (GK201903066 to HW, 2018CSLY016 to XL, and
   2018CSLY015 to BZ).
CR Agbor TA, 2008, BIOCHEM SOC T, V36, P445, DOI 10.1042/BST0360445
   Alahari S, 2015, ENDOCRINOLOGY, V156, P3012, DOI 10.1210/en.2015-1262
   Alonso A, 2015, CYTOSKELETON, V72, P305, DOI 10.1002/cm.21226
   Alves MG, 2013, CELL MOL LIFE SCI, V70, P777, DOI 10.1007/s00018-012-1079-1
   Battistelli M, 2016, OXID MED CELL LONGEV, V2016, DOI 10.1155/2016/2054650
   Bawa-Khalfe T, 2012, P NATL ACAD SCI USA, V109, P17466, DOI 10.1073/pnas.1209378109
   Bhattacharjee J, 2016, PLACENTA, V40, P8, DOI 10.1016/j.placenta.2016.02.002
   BORER RA, 1989, CELL, V56, P379, DOI 10.1016/0092-8674(89)90241-9
   Bossola M, 2016, CLIN EXP PHARMACOL P, V43, P522, DOI 10.1111/1440-1681.12559
   Cavanaugh E, 2017, GENE, V617, P24, DOI 10.1016/j.gene.2017.03.039
   Chen X, 2018, METHODS MOL BIOL, V1684, P63, DOI 10.1007/978-1-4939-7362-0_6
   Chen XL, 2020, J CELL MOL MED, V24, P5454, DOI 10.1111/jcmm.15199
   Cheng JL, 2017, TUMOR BIOL, V39, DOI 10.1177/1010428317694543
   Cheng J, 2007, CELL, V131, P584, DOI 10.1016/j.cell.2007.08.045
   Crncec A, 2019, FEBS LETT, V593, P2868, DOI 10.1002/1873-3468.13635
   Dikic I, 2018, NAT REV MOL CELL BIO, V19, P349, DOI 10.1038/s41580-018-0003-4
   Dou H, 2010, MOL CELL, V39, P333, DOI 10.1016/j.molcel.2010.07.021
   Figueroa-Romero C, 2009, FASEB J, V23, P3917, DOI 10.1096/fj.09-136630
   Finkbeiner E, 2011, NUCLEUS-PHILA, V2, P527, DOI 10.4161/nucl.2.6.17604
   Flotho A, 2013, ANNU REV BIOCHEM, V82, P357, DOI 10.1146/annurev-biochem-061909-093311
   Gao LC, 2018, J GENET GENOMICS, V45, P125, DOI 10.1016/j.jgg.2017.12.002
   Geng YJ, 2017, J CLIN ANESTH, V38, P165, DOI 10.1016/j.jclinane.2017.02.007
   Girard BJ, 2014, MOL CELL ENDOCRINOL, V382, P642, DOI 10.1016/j.mce.2013.07.031
   Gong L, 2006, J BIOL CHEM, V281, P15869, DOI 10.1074/jbc.M511658200
   Gong LM, 1997, J BIOL CHEM, V272, P28198, DOI 10.1074/jbc.272.45.28198
   Gong LM, 1999, FEBS LETT, V448, P185, DOI 10.1016/S0014-5793(99)00367-1
   Guo CX, 2017, SCI REP-UK, V7, DOI 10.1038/s41598-017-13212-7
   Guo C, 2013, EMBO J, V32, P1514, DOI 10.1038/emboj.2013.65
   Haindl M, 2008, EMBO REP, V9, P273, DOI 10.1038/embor.2008.3
   Hall AR, 2014, BRIT J PHARMACOL, V171, P1890, DOI 10.1111/bph.12516
   Han Y, 2010, J BIOL CHEM, V285, P12906, DOI 10.1074/jbc.M109.071431
   Hang J, 2002, J BIOL CHEM, V277, P19961, DOI 10.1074/jbc.M201799200
   Hasegawa Y, 2011, ACTA NEUROCHIR SUPPL, V110, P43, DOI 10.1007/978-3-7091-0353-1_8
   Hay RT, 2005, MOL CELL, V18, P1, DOI 10.1016/j.molcel.2005.03.012
   Honda R, 1997, FEBS LETT, V420, P25, DOI 10.1016/S0014-5793(97)01480-4
   Hornung V, 2008, NAT IMMUNOL, V9, P847, DOI 10.1038/ni.1631
   Hsu KS, 2018, CELL BIOSCI, V8, DOI 10.1186/s13578-018-0204-8
   Huang C, 2009, EMBO J, V28, P2748, DOI 10.1038/emboj.2009.210
   Huang CJ, 2015, SCI REP-UK, V5, DOI 10.1038/srep15600
   Johnson ES, 2004, ANNU REV BIOCHEM, V73, P355, DOI 10.1146/annurev.biochem.73.011303.074118
   Johnson RL, 1997, AM J EPIDEMIOL, V146, P266
   Kademani D, 2007, MAYO CLIN PROC, V82, P878, DOI 10.4065/82.7.878
   Kamitani T, 1998, J BIOL CHEM, V273, P11349, DOI 10.1074/jbc.273.18.11349
   Kang XL, 2010, MOL CELL, V38, P191, DOI 10.1016/j.molcel.2010.03.005
   Klein UR, 2009, MOL BIOL CELL, V20, P410, DOI 10.1091/mbc.E08-05-0511
   Kolli N, 2010, BIOCHEM J, V430, P335, DOI 10.1042/BJ20100504
   Kumar A, 2015, COMPUT STRUCT BIOTEC, V13, P204, DOI 10.1016/j.csbj.2015.03.001
   Kunz K, 2018, J CELL SCI, V131, DOI 10.1242/jcs.211904
   Kunz K, 2016, CELL REP, V16, P3075, DOI 10.1016/j.celrep.2016.08.031
   Kuo ML, 2008, CELL CYCLE, V7, P3378, DOI 10.4161/cc.7.21.6930
   Lao YM, 2018, J BIOL CHEM, V293, P3965, DOI 10.1074/jbc.M117.816769
   Liang P, 2017, BRIT J ANAESTH, V119, P1047, DOI 10.1093/bja/aex043
   Liu J, 2016, IMMUNITY, V45, P15, DOI 10.1016/j.immuni.2016.06.020
   Liu KJ, 2020, AUTOPHAGY, V16, P975, DOI 10.1080/15548627.2019.1647944
   Liu YH, 2016, SCI REP-UK, V6, DOI 10.1038/srep37351
   Luo J, 2017, J TOXICOL SCI, V42, P529, DOI 10.2131/jts.42.529
   Manke IA, 2003, SCIENCE, V302, P636, DOI 10.1126/science.1088877
   Martelli MP, 2015, BLOOD, V125, P3455, DOI 10.1182/blood-2014-11-611459
   Matic I, 2008, MOL CELL PROTEOMICS, V7, P132, DOI 10.1074/mcp.M700173-MCP200
   Maxwell PH, 1999, NATURE, V399, P271, DOI 10.1038/20459
   Mok KW, 2013, FASEB J, V27, P1137, DOI 10.1096/fj.12-212977
   Mruk DD, 2015, ENDOCR REV, V36, P564, DOI [10.1210/er.2014-1101, 10.1210/er.2015-1127]
   Mukhopadhyay D, 2007, TRENDS BIOCHEM SCI, V32, P286, DOI 10.1016/j.tibs.2007.05.002
   Musso G, 2009, PROG LIPID RES, V48, P1, DOI 10.1016/j.plipres.2008.08.001
   Nagpal JK, 2002, CANCER, V94, P2393, DOI 10.1002/cncr.10499.abs
   Nayak A, 2019, CELL REP, V27, P2725, DOI 10.1016/j.celrep.2019.04.107
   Nayak A, 2017, EPIGENET CHROMATIN, V10, DOI 10.1186/s13072-017-0122-8
   Nayak A, 2014, MOL CELL, V55, P47, DOI 10.1016/j.molcel.2014.05.011
   Nishida T, 2011, BIOCHEM BIOPH RES CO, V406, P285, DOI 10.1016/j.bbrc.2011.02.034
   Ou XM, 2003, J NEUROSCI, V23, P7415
   Park JG, 2019, THER ADV MED ONCOL, V11, DOI 10.1177/1758835919875574
   Preusser M, 2011, ANN NEUROL, V70, P9, DOI 10.1002/ana.22425
   Pu J, 2017, CIRCULATION, V136, P1462, DOI 10.1161/CIRCULATIONAHA.117.030582
   Qi YT, 2014, NEURON, V83, P1159, DOI 10.1016/j.neuron.2014.07.042
   Qi YT, 2014, J BIOL CHEM, V289, P3288, DOI 10.1074/jbc.M113.518282
   Raman N, 2016, MOL CELL, V64, P607, DOI 10.1016/j.molcel.2016.09.039
   Raman N, 2014, MOL CELL BIOL, V34, P4474, DOI 10.1128/MCB.00801-14
   Rawlings N, 2019, PLOS ONE, V14, DOI 10.1371/journal.pone.0213331
   Ren YH, 2014, ONCOTARGET, V5, P7093, DOI 10.18632/oncotarget.2197
   Rinella ME, 2015, JAMA-J AM MED ASSOC, V313, P2263, DOI 10.1001/jama.2015.5370
   Rolfo A, 2010, PLOS ONE, V5, DOI 10.1371/journal.pone.0013288
   Roychoudhuri R, 2013, NATURE, V498, P506, DOI 10.1038/nature12199
   Rytinki MM, 2009, J BIOL CHEM, V284, P26184, DOI 10.1074/jbc.M109.038943
   Sallais J, 2017, ONCOTARGET, V8, P114002, DOI 10.18632/oncotarget.23113
   Schuit SCE, 2004, BONE, V34, P195, DOI 10.1016/j.bone.2003.10.001
   SEMENZA GL, 1992, MOL CELL BIOL, V12, P5447, DOI 10.1128/MCB.12.12.5447
   Shang JW, 2016, J ALZHEIMERS DIS, V52, P113, DOI 10.3233/JAD-151126
   Shao LY, 2020, FASEB J, V34, P1497, DOI 10.1096/fj.201901653R
   Sharpe MA, 2016, ONCOTARGET, V7, P3369, DOI 10.18632/oncotarget.6582
   Sibai BM, 2009, AM J OBSTET GYNECOL, V200, DOI 10.1016/j.ajog.2008.07.048
   Siegel RL, 2016, CA-CANCER J CLIN, V66, P7, DOI 10.3322/caac.21332
   Song JI, 2000, ONCOGENE, V19, P2489, DOI 10.1038/sj.onc.1203483
   Song ZY, 2017, TUMOR BIOL, V39, DOI 10.1177/1010428317714626
   Stielow B, 2010, PLOS GENET, V6, DOI 10.1371/journal.pgen.1001203
   Sun ZJ, 2013, ONCOL REP, V29, P1701, DOI 10.3892/or.2013.2318
   Sweeney MD, 2016, NAT NEUROSCI, V19, P771, DOI 10.1038/nn.4288
   Taube JH, 2010, P NATL ACAD SCI USA, V107, P15449, DOI 10.1073/pnas.1004900107
   Ulrich HD, 2009, DNA REPAIR, V8, P461, DOI 10.1016/j.dnarep.2009.01.006
   Wang DP, 2017, BIOMED PHARMACOTHER, V91, P872, DOI 10.1016/j.biopha.2017.05.021
   Wang J, 2010, CIRC RES, V107, P19, DOI 10.1161/CIRCRESAHA.110.220491
   Wang M, 2016, PROTEIN CELL, V7, P63, DOI 10.1007/s13238-015-0216-7
   Wang Y, 2012, ACTA PHARMACOL SIN, V33, P953, DOI 10.1038/aps.2012.40
   Wang Y, 2012, ANTIOXID REDOX SIGN, V16, P649, DOI 10.1089/ars.2011.4313
   Wegele H, 2004, REV PHYSIOL BIOCH P, V151, P1, DOI 10.1007/s10254-003-0021-1
   Wei B, 2018, CANCER RES, V78, P2171, DOI 10.1158/0008-5472.CAN-17-2288
   Wei HX, 2012, NEUROCHEM RES, V37, P2758, DOI 10.1007/s11064-012-0869-z
   Wu D, 2017, ONCOTARGET, V8, P58430, DOI 10.18632/oncotarget.16915
   Wu HM, 2016, ADV PROTEIN CHEM STR, V103, P295, DOI 10.1016/bs.apcsb.2015.11.009
   Xi R, 2019, PLOS ONE, V14, DOI 10.1371/journal.pone.0209179
   Xu RD, 2019, NAT COMMUN, V10, DOI 10.1038/s41467-019-11795-5
   Yan S, 2010, EMBO J, V29, P3773, DOI 10.1038/emboj.2010.245
   Yang CY, 2019, J NEUROSCI, V39, P4959, DOI 10.1523/JNEUROSCI.2395-18.2019
   Yang YQ, 2015, BRAIN RES, V1622, P270, DOI 10.1016/j.brainres.2015.06.032
   Yeh ETH, 2009, J BIOL CHEM, V284, P8223, DOI 10.1074/jbc.R800050200
   Yeh ETH, 2000, GENE, V248, P1, DOI 10.1016/S0378-1119(00)00139-6
   Yu XY, 2018, THORAC CANCER, V9, P3, DOI 10.1111/1759-7714.12490
   Yu Z, 2015, CELL MOL NEUROBIOL, V35, P733, DOI 10.1007/s10571-015-0169-7
   Yun CW, 2008, J CELL BIOL, V183, P589, DOI 10.1083/jcb.200807185
   Zhang MH, 2005, MOL CELL, V20, P525, DOI 10.1016/j.molcel.2005.09.023
   Zhang Y, 2018, EUR REV MED PHARMACO, V22, P2778, DOI 10.26355/eurrev_201805_14975
   Zhang YX, 2020, CELL REP, V30, P1951, DOI 10.1016/j.celrep.2020.01.036
   Zhao Z, 2015, CELL, V163, P1064, DOI 10.1016/j.cell.2015.10.067
   Zheng F, 2020, NEUROCHEM RES, V45, P956, DOI 10.1007/s11064-020-02976-6
   Zheng RF, 2017, J CELL BIOCHEM, V118, P1583, DOI 10.1002/jcb.25820
   Zhou Z, 2016, ONCOGENE, V35, P5826, DOI 10.1038/onc.2016.124
   Zhou Z, 2019, J CANCER, V10, P3427, DOI 10.7150/jca.30318
NR 126
TC 3
Z9 3
U1 2
U2 4
PU FRONTIERS MEDIA SA
PI LAUSANNE
PA AVENUE DU TRIBUNAL FEDERAL 34, LAUSANNE, CH-1015, SWITZERLAND
SN 1664-042X
J9 FRONT PHYSIOL
JI Front. Physiol.
PD OCT 30
PY 2020
VL 11
AR 558220
DI 10.3389/fphys.2020.558220
PG 14
WC Physiology
WE Science Citation Index Expanded (SCI-EXPANDED)
SC Physiology
GA OQ4ST
UT WOS:000588775900001
PM 33192553
OA gold, Green Published
DA 2022-04-10
ER

PT J
AU Au, SLK
   Ng, IOL
   Wong, CM
AF Au, Sandy Leung-Kuen
   Ng, Irene Oi-Lin
   Wong, Chun-Ming
TI Epigenetic dysregulation in hepatocellular carcinoma: focus on polycomb
   group proteins
SO FRONTIERS OF MEDICINE
LA English
DT Review
DE liver cancer; epigenetic; histone modification; polycomb group
   proteins; enhancer of zeste homolog 2 (EZH2)
ID HISTONE METHYLTRANSFERASE EZH2; H3 LYSINE-27 METHYLATION;
   TUMOR-SUPPRESSOR; DNA METHYLATION; MESSENGER-RNA; INHIBITOR
   3-DEAZANEPLANOCIN; DEVELOPMENTAL REGULATORS; GENE REPRESSION; TARGET
   GENES; EXPRESSION
AB Hepatocellular carcinoma (HCC) development is characterized by the presence of epigenetic alterations, including promoter DNA hypermethylation and post-translational modification of histone, which profoundly affect expression of a wide repertoire of genes critical for cancer development. Emerging data suggest that deregulation of polycomb group (PcG) proteins, which are key chromatin modifiers repressing gene transcription during developmental stage, plays a causative role in oncogenesis. PcG proteins assemble into polycomb repressive complex 1 (PRC1) and polycomb repressive complex 2 (PRC2) to impose the histone H3 lysine 27 trimethylation (H3K27me3) modification for repression. In this review, we will first recapitulate the mechanism of two key epigenetic pathway: DNA methylation and histone modification. Specifically, we will focus our discussion on the molecular roles of PcG proteins. Next, we will highlight recent findings on PcG proteins, their clinicopathological implication and their downstream molecular consequence in hepatocarcinogenesis. Last but not least, we will consider the therapeutic potential of targeting enhancer of zeste homolog 2 (EZH2) as a possible treatment for HCC. Improving our understanding on the roles of PcG proteins in hepatocarcinogenesis can benefit the development of epigenetic-based therapy.
C1 [Ng, Irene Oi-Lin] Univ Hong Kong, Li Ka Shing Fac Med, State Key Lab Liver Res, Hong Kong, Hong Kong, Peoples R China.
   Univ Hong Kong, Li Ka Shing Fac Med, Dept Pathol, Hong Kong, Hong Kong, Peoples R China.
RP Ng, IOL (corresponding author), Univ Hong Kong, Li Ka Shing Fac Med, State Key Lab Liver Res, Hong Kong, Hong Kong, Peoples R China.
EM iolng@hkucc.hku.hk; jackwong@pathology.hku.hk
RI WONG, Chun-Ming/A-6739-2009
OI WONG, Chun-Ming/0000-0002-2497-7858; Ng, Irene
   Oi-lin/0000-0001-7532-2029
FU Hong Kong Research Grants Council General Research FundHong Kong
   Research Grants Council [HKU 782411M]; University of Hong Kong Seed
   Funding Programme for Basic ResearchUniversity of Hong Kong
   [200811159061]; Hong Kong Research Grants Council Collaborative Research
   FundHong Kong Research Grants Council [HKU 7/CRG/09]
FX The study was supported by Hong Kong Research Grants Council General
   Research Fund (HKU 782411M to C. M. Wong), the University of Hong Kong
   Seed Funding Programme for Basic Research (200811159061 to C. M. Wong)
   and Hong Kong Research Grants Council Collaborative Research Fund (HKU
   7/CRG/09 to I.O.L. Ng). I.O.L. Ng is Loke Yew Professor in Pathology.
CR Akasaka T, 1996, DEVELOPMENT, V122, P1513
   Au SLK, 2012, HEPATOLOGY, V56, P622, DOI 10.1002/hep.25679
   Baylin SB, 2011, NAT REV CANCER, V11, P726, DOI 10.1038/nrc3130
   BOHM L, 1984, BIOSCIENCE REP, V4, P365, DOI 10.1007/BF01122502
   Boyer LA, 2006, NATURE, V441, P349, DOI 10.1038/nature04733
   Bracken AP, 2006, GENE DEV, V20, P1123, DOI 10.1101/gad.381706
   Brown JL, 1998, MOL CELL, V1, P1057, DOI 10.1016/S1097-2765(00)80106-9
   Cai MY, 2011, GUT, V60, P967, DOI 10.1136/gut.2010.231993
   Cai MY, 2011, MOL MED, V17, P12, DOI 10.2119/molmed.2010.00103
   Cao Q, 2011, CANCER CELL, V20, P187, DOI 10.1016/j.ccr.2011.06.016
   Cao R, 2004, MOL CELL, V15, P57, DOI 10.1016/j.molcel.2004.06.020
   Cao R, 2002, SCIENCE, V298, P1039, DOI 10.1126/science.1076997
   Chen D, 2009, EMBO REP, V10, P166, DOI 10.1038/embor.2008.231
   Chen YC, 2007, HEPATOLOGY, V46, P200, DOI 10.1002/hep.21668
   Cheng ASL, 2011, CANCER RES, V71, P4028, DOI 10.1158/0008-5472.CAN-10-3342
   Cheng LL, 2012, CLIN CANCER RES, V18, P4201, DOI 10.1158/1078-0432.CCR-12-0036
   CHIANG PK, 1979, BIOCHEM PHARMACOL, V28, P1897, DOI 10.1016/0006-2952(79)90642-7
   Chiba T, 2008, CANCER RES, V68, P7742, DOI 10.1158/0008-5472.CAN-07-5882
   Chiba T, 2007, GASTROENTEROLOGY, V133, P937, DOI 10.1053/j.gastro.2007.06.016
   Chiba T, 2012, INT J CANCER, V130, P2557, DOI 10.1002/ijc.26264
   Effendi K, 2010, CANCER SCI, V101, P666, DOI 10.1111/j.1349-7006.2009.01431.x
   Ehrlich M, 2002, ONCOGENE, V21, P5400, DOI 10.1038/sj.onc.1205651
   Ferlay J, 2010, IARC CANCERBASE, V10
   Fiskus W, 2009, BLOOD, V114, P2733, DOI 10.1182/blood-2009-03-213496
   Forzati F, 2012, J CLIN INVEST, V122, P612, DOI 10.1172/JCI58620
   GAMASOSA MA, 1983, NUCLEIC ACIDS RES, V11, P6883, DOI 10.1093/nar/11.19.6883
   Gao ZH, 2012, MOL CELL, V45, P344, DOI 10.1016/j.molcel.2012.01.002
   Garcia E, 1999, EMBO J, V18, P3404, DOI 10.1093/emboj/18.12.3404
   Gramantieri L, 2008, J CELL MOL MED, V12, P2189, DOI 10.1111/j.1582-4934.2008.00533.x
   HOLLIDAY R, 1975, SCIENCE, V187, P226, DOI 10.1126/science.1111098
   Huntzinger E, 2011, NAT REV GENET, V12, P99, DOI 10.1038/nrg2936
   Jemal A, 2011, CA-CANCER J CLIN, V61, P134, DOI [10.3322/caac.20115, 10.3322/caac.20107]
   Jenuwein T, 2001, SCIENCE, V293, P1074, DOI 10.1126/science.1063127
   Ji JF, 2009, CANCER BIOL THER, V8, P1683, DOI 10.4161/cbt.8.18.8898
   Jones PA, 1999, NAT GENET, V21, P163, DOI 10.1038/5947
   Jones PA, 2002, NAT REV GENET, V3, P415, DOI 10.1038/nrg816
   Jones PA, 2007, CELL, V128, P683, DOI 10.1016/j.cell.2007.01.029
   Jones PL, 1998, NAT GENET, V19, P187, DOI 10.1038/561
   Juan AH, 2009, MOL CELL, V36, P61, DOI 10.1016/j.molcel.2009.08.008
   Kanai Y, 2010, CANCER SCI, V101, P36, DOI 10.1111/j.1349-7006.2009.01383.x
   Karamitopoulou E, 2010, EUR J CANCER, V46, P1438, DOI 10.1016/j.ejca.2010.01.033
   Kirmizis A, 2003, MOL CANCER THER, V2, P113
   Kondoh N, 2001, INT J ONCOL, V18, P1271
   Kornberg RD, 1999, CELL, V98, P285, DOI 10.1016/S0092-8674(00)81958-3
   Lee TI, 2006, CELL, V125, P301, DOI 10.1016/j.cell.2006.02.043
   Levine SS, 2004, TRENDS BIOCHEM SCI, V29, P478, DOI 10.1016/j.tibs.2004.07.007
   LEWIS EB, 1978, NATURE, V276, P565, DOI 10.1038/276565a0
   Lister R, 2009, GENOME RES, V19, P959, DOI 10.1101/gr.083451.108
   Miranda TB, 2009, MOL CANCER THER, V8, P1579, DOI 10.1158/1535-7163.MCT-09-0013
   Montgomery ND, 2005, CURR BIOL, V15, P942, DOI 10.1016/j.cub.2005.04.051
   Morey L, 2012, CELL STEM CELL, V10, P47, DOI 10.1016/j.stem.2011.12.006
   Notarbartolo M, 2011, OMICS, V15, P267, DOI 10.1089/omi.2010.0096
   O'Loghlen A, 2012, CELL STEM CELL, V10, P33, DOI 10.1016/j.stem.2011.12.004
   Otte AP, 2003, CURR OPIN GENET DEV, V13, P448, DOI 10.1016/S0959-437X(03)00108-4
   Pallante P, 2010, EUR J CANCER, V46, P2304, DOI 10.1016/j.ejca.2010.05.011
   Pandey RR, 2008, MOL CELL, V32, P232, DOI 10.1016/j.molcel.2008.08.022
   Pasini D, 2004, EMBO J, V23, P4061, DOI 10.1038/sj.emboj.7600402
   Plath K, 2003, SCIENCE, V300, P131, DOI 10.1126/science.1084274
   RIGGS AD, 1975, CYTOGENET CELL GENET, V14, P9, DOI 10.1159/000130315
   Rinn JL, 2007, CELL, V129, P1311, DOI 10.1016/j.cell.2007.05.022
   Saito Y, 2001, HEPATOLOGY, V33, P561, DOI 10.1053/jhep.2001.22507
   Sander S, 2008, BLOOD, V112, P4202, DOI 10.1182/blood-2008-03-147645
   Sasaki M, 2008, LAB INVEST, V88, P873, DOI 10.1038/labinvest.2008.52
   Schuringa JJ, 2010, CURR OPIN HEMATOL, V17, P294, DOI 10.1097/MOH.0b013e328338c439
   Sing A, 2009, CELL, V138, P885, DOI 10.1016/j.cell.2009.08.020
   Squazzo SL, 2006, GENOME RES, V16, P890, DOI 10.1101/gr.5306606
   Strahl BD, 2000, NATURE, V403, P41, DOI 10.1038/47412
   Studach LL, 2012, HEPATOLOGY, V56, P1240, DOI 10.1002/hep.25781
   Sudo T, 2005, BRIT J CANCER, V92, P1754, DOI 10.1038/sj.bjc.6602531
   Takigawa Y, 2008, CURR DRUG target, V9, P1013, DOI 10.2174/138945008786786127
   Tan J, 2007, GENE DEV, V21, P1050, DOI 10.1101/gad.1524107
   Tang ZY, 2001, WORLD J GASTROENTERO, V7, P445
   Tavares L, 2012, CELL, V148, P664, DOI 10.1016/j.cell.2011.12.029
   Tung EKK, 2009, INT J CANCER, V124, P1811, DOI 10.1002/ijc.24115
   Turker MS, 1999, SEMIN CANCER BIOL, V9, P329, DOI 10.1006/scbi.1999.0133
   vanderLugt NMT, 1996, MECH DEVELOP, V58, P153, DOI 10.1016/S0925-4773(96)00570-9
   Varambally S, 2008, SCIENCE, V322, P1695, DOI 10.1126/science.1165395
   Wang H, 2008, J CANCER RES CLIN, V134, P535, DOI 10.1007/s00432-007-0316-8
   Wang WH, 2011, HEPATOLOGY, V53, P1137, DOI 10.1002/hep.24163
   Wilkinson FH, 2006, P NATL ACAD SCI USA, V103, P19296, DOI 10.1073/pnas.0603564103
   Wong CM, 2007, HEPATOLOGY, V45, P1129, DOI 10.1002/hep.21578
   Xu CR, 2009, MOL CANCER RES, V7, P1937, DOI 10.1158/1541-7786.MCR-09-0333
   Zhang L, 2011, VIRUS RES, V157, P76, DOI 10.1016/j.virusres.2011.02.009
   Zhang SJ, 2012, J MOL MED, V90, P1069, DOI 10.1007/s00109-012-0879-y
   Zheng F, 2012, GUT, V61, P278, DOI 10.1136/gut.2011.239145
NR 85
TC 13
Z9 13
U1 2
U2 9
PU SPRINGER
PI NEW YORK
PA ONE NEW YORK PLAZA, SUITE 4600, NEW YORK, NY, UNITED STATES
SN 2095-0217
EI 2095-0225
J9 FRONT MED-PRC
JI Front. Med.
PD JUN
PY 2013
VL 7
IS 2
BP 231
EP 241
DI 10.1007/s11684-013-0253-7
PG 11
WC Oncology; Medicine, Research & Experimental
WE Science Citation Index Expanded (SCI-EXPANDED)
SC Oncology; Research & Experimental Medicine
GA V41UN
UT WOS:000209571200010
PM 23620257
DA 2022-04-10
ER

PT S
AU Norris, KL
   Yao, TP
AF Norris, Kristi L.
   Yao, Tso-Pang
BE Scott, I
TI Lysine modifications and autophagy
SO LYSINE-BASED POST-TRANSLATIONAL MODIFICATION OF PROTEINS
SE Essays in Biochemistry
LA English
DT Review; Book Chapter
ID PARKIN; DEGRADATION; PROTEASOME; UBIQUITINATION; ACETYLATION; HDAC6;
   P62/SQSTM1; HUNTINGTIN; MITOPHAGY; DISEASE
AB Nutrient deprivation or cellular stress leads to the activation of a catabolic pathway that is conserved across species, known as autophagy. This process is considered to be adaptive and plays an important role in a number of cellular processes, including metabolism, immunity and development. Autophagy has also been linked to diseases, such as cancer and neurodegeneration, highlighting the importance of a better insight into its regulation. In the present chapter, we discuss how PTMs (post-translational modification) of lysine residues by acetylation and ubiquitination alter the function of key proteins involved in the activation, maturation and substrate selectivity of autophagy. We also discuss the clinical potential of targeting these modifications to modulate autophagic activities.
C1 [Norris, Kristi L.; Yao, Tso-Pang] Duke Univ, Dept Pharmacol & Canc Biol, Durham, NC 27710 USA.
RP Yao, TP (corresponding author), Duke Univ, Dept Pharmacol & Canc Biol, Durham, NC 27710 USA.
EM yao00001@mc.duke.edu
CR Abe T, 2008, CURR OPIN PHARMACOL, V8, P57, DOI 10.1016/j.coph.2007.12.002
   Arsham AM, 2006, CURR OPIN CELL BIOL, V18, P589, DOI 10.1016/j.ceb.2006.09.005
   Barth TK, 2010, TRENDS BIOCHEM SCI, V35, P618, DOI 10.1016/j.tibs.2010.05.006
   Bjorkoy G, 2005, J CELL BIOL, V171, P603, DOI 10.1083/jcb.200507002
   Burnett C, 2011, NATURE, V477, P482, DOI 10.1038/nature10296
   Chan NC, 2011, HUM MOL GENET, V20, P1726, DOI 10.1093/hmg/ddr048
   Chen JJ, 2011, CHEM BIOL, V18, P1390, DOI 10.1016/j.chembiol.2011.08.014
   Chung SW, 2010, ARCH BIOCHEM BIOPHYS, V501, P79, DOI 10.1016/j.abb.2010.05.003
   Dupont N, 2010, BIOL CELL, V102, P621, DOI 10.1042/BC20100101
   Iwata A, 2005, J BIOL CHEM, V280, P40282, DOI 10.1074/jbc.M508786200
   Jeong H, 2009, CELL, V137, P60, DOI 10.1016/j.cell.2009.03.018
   Kawaguchi Y, 2003, CELL, V115, P727, DOI 10.1016/S0092-8674(03)00939-5
   Lan F, 2008, J BIOL CHEM, V283, P27628, DOI 10.1074/jbc.M805711200
   Lee HD, 2010, EXP MECH, V50, P661, DOI 10.1007/s11340-009-9245-6
   Lee JY, 2010, J CELL BIOL, V189, P671, DOI 10.1083/jcb.201001039
   Lee JY, 2010, EMBO J, V29, P969, DOI 10.1038/emboj.2009.405
   Lu JY, 2011, CELL, V146, P968, DOI 10.1016/j.cell.2011.07.044
   Madeo F, 2010, NAT CELL BIOL, V12, P842, DOI 10.1038/ncb0910-842
   McEwan DG, 2011, TRENDS CELL BIOL, V21, P195, DOI 10.1016/j.tcb.2010.12.006
   Mizushima N, 2008, NATURE, V451, P1069, DOI 10.1038/nature06639
   Moresi V, 2012, P NATL ACAD SCI USA, V109, P1649, DOI 10.1073/pnas.1121159109
   Narendra DP, 2011, ANTIOXID REDOX SIGN, V14, P1929, DOI 10.1089/ars.2010.3799
   Narendra DP, 2010, AUTOPHAGY, V6, P1090, DOI 10.4161/auto.6.8.13426
   Olzmann JA, 2007, J CELL BIOL, V178, P1025, DOI 10.1083/jcb.200611128
   Seibenhener ML, 2004, MOL CELL BIOL, V24, P8055, DOI 10.1128/MCB.24.18.8055-8068.2004
   Shi CS, 2010, AUTOPHAGY, V6, P986, DOI 10.4161/auto.6.7.13288
   Sriram SM, 2011, SCI SIGNAL, V4, DOI 10.1126/scisignal.2002052
   Tanaka A, 2010, J CELL BIOL, V191, P1367, DOI 10.1083/jcb.201007013
   Yoshii SR, 2011, J BIOL CHEM, V286, P19630, DOI 10.1074/jbc.M110.209338
   Zhou X, 2007, P NATL ACAD SCI USA, V104, P5842, DOI 10.1073/pnas.0701402104
NR 30
TC 4
Z9 5
U1 1
U2 9
PU PORTLAND PRESS LTD
PI LONDON
PA 5TH FL, 90 HIGH HOLBORN, LONDON, WC1V 6LJ, ENGLAND
SN 0071-1365
EI 1744-1358
BN 978-1-85578-185-6
J9 ESSAYS BIOCHEM
JI Essays Biochem.
PY 2012
VL 52
BP 65
EP 77
DI 10.1042/BSE0520065
PG 13
WC Biochemistry & Molecular Biology
WE Book Citation Index – Science (BKCI-S); Science Citation Index Expanded (SCI-EXPANDED)
SC Biochemistry & Molecular Biology
GA BDT10
UT WOS:000314729500007
PM 22708564
DA 2022-04-10
ER

PT J
AU Dai, ZW
   Mentch, SJ
   Gao, X
   Nichenametla, SN
   Locasale, JW
AF Dai, Ziwei
   Mentch, Samantha J.
   Gao, Xia
   Nichenametla, Sailendra N.
   Locasale, Jason W.
TI Methionine metabolism influences genomic architecture and gene
   expression through H3K4me3 peak width
SO NATURE COMMUNICATIONS
LA English
DT Article
ID CHROMATIN DYNAMICS; DNA METHYLATION; HISTONE; TRANSCRIPTION;
   DIFFERENTIATION; FUMARATE; CANCER; epigenetic; PROGRESSION; RESTRICTION
AB Nutrition and metabolism are known to influence chromatin biology and epigenetic through post- translational modifications, yet how this interaction influences genomic architecture and connects to gene expression is unknown. Here we consider, as a model, the metabolicallydriven dynamics of H3K4me3, a histone methylation mark that is known to encode information about active transcription, cell identity, and tumor suppression. We analyze the genome-wide changes in H3K4me3 and gene expression in response to alterations in methionine availability in both normal mouse physiology and human cancer cells. Surprisingly, we find that the location of H3K4me3 peaks is largely preserved under methionine restriction, while the response of H3K4me3 peak width encodes almost all aspects of H3K4me3 biology including changes in expression levels, and the presence of cell identity and cancer- associated genes. These findings may reveal general principles for how nutrient availability modulates specific aspects of chromatin dynamics to mediate biological function.
C1 [Dai, Ziwei; Mentch, Samantha J.; Gao, Xia; Locasale, Jason W.] Duke Univ, Sch Med, Duke Canc Inst, Duke Mol Physiol Inst,Dept Pharmacol & Canc Biol, Durham, NC 27710 USA.
   [Nichenametla, Sailendra N.] Orentreich Fdn Adv Sci, Cold Spring on Hudson, NY 10516 USA.
RP Locasale, JW (corresponding author), Duke Univ, Sch Med, Duke Canc Inst, Duke Mol Physiol Inst,Dept Pharmacol & Canc Biol, Durham, NC 27710 USA.
EM jason.locasale@duke.edu
RI Nichenametla, Sailendra Nath/B-2733-2009; Dai, Ziwei/O-3397-2019;
   Locasale, Jason W/ABE-6505-2020
OI Nichenametla, Sailendra Nath/0000-0002-5969-3572; Locasale, Jason
   W/0000-0002-7766-3502; Gao, Xia/0000-0003-0979-9990; Dai,
   Ziwei/0000-0002-0858-638X
FU American Cancer SocietyAmerican Cancer Society [RSG-16-214-01-TBE];
   National Institutes of HealthUnited States Department of Health & Human
   ServicesNational Institutes of Health (NIH) - USA [R01CA193256,
   R00CA168997, P30CA014236]; NATIONAL CANCER INSTITUTEUnited States
   Department of Health & Human ServicesNational Institutes of Health (NIH)
   - USANIH National Cancer Institute (NCI) [R01CA193256, R00CA168997,
   P30CA014236] Funding Source: NIH RePORTER; OFFICE OF THE DIRECTOR,
   NATIONAL INSTITUTES OF HEALTHUnited States Department of Health & Human
   ServicesNational Institutes of Health (NIH) - USA [S10OD018164] Funding
   Source: NIH RePORTER
FX Support from the American Cancer Society (RSG-16-214-01-TBE) and
   National Institutes of Health (R01CA193256, R00CA168997, P30CA014236)
   are gratefully acknowledged. Z.D. thanks Dr. Ning Yin for helpful
   discussions, Dr. Zhengtao Xiao for help with the GSEA analysis, and
   Annamarie Allen for comments on the text. We thank Dwight Mattocks
   (Orentreich Foundation for the Advancement of Science) for assistance
   with animal husbandry. Support for computational resources from the Duke
   Compute Cluster and Data Commons Storage is gratefully acknowledged.
CR Ables GP, 2015, SCI REP-UK, V5, DOI 10.1038/srep08886
   Ables GP, 2012, PLOS ONE, V7, DOI 10.1371/journal.pone.0051357
   Anders S, 2015, BIOINFORMATICS, V31, P166, DOI 10.1093/bioinformatics/btu638
   Arts RJW, 2016, CELL METAB, V24, P807, DOI 10.1016/j.cmet.2016.10.008
   Benayoun BA, 2014, CELL, V158, P673, DOI 10.1016/j.cell.2014.06.027
   Carey BW, 2015, NATURE, V518, P413, DOI 10.1038/nature13981
   Chen KF, 2015, NAT GENET, V47, P1149, DOI 10.1038/ng.3385
   Dahl JA, 2016, NATURE, V537, P548, DOI 10.1038/nature19360
   Duncan EM, 2015, CELL REP, V13, P2741, DOI 10.1016/j.celrep.2015.11.059
   Gu W, 2016, CELL STEM CELL, V19, P476, DOI 10.1016/j.stem.2016.08.008
   Guenther MG, 2007, CELL, V130, P77, DOI 10.1016/j.cell.2007.05.042
   Hardikar AA, 2015, CELL METAB, V22, P312, DOI 10.1016/j.cmet.2015.06.008
   Harmanci A, 2014, GENOME BIOL, V15, DOI 10.1186/s13059-014-0474-3
   Hart T, 2015, CELL, V163, DOI 10.1016/j.cell.2015.11.015
   Heinz S, 2010, MOL CELL, V38, P576, DOI 10.1016/j.molcel.2010.05.004
   Howe FS, 2017, BIOESSAYS, V39, DOI 10.1002/bies.201600095
   Hu DQ, 2017, MOL CELL, V65, P460, DOI 10.1016/j.molcel.2017.01.013
   Jiang YH, 2015, NAT CELL BIOL, V17, P1158, DOI 10.1038/ncb3209
   Kerimoglu C, 2017, CELL REP, V20, P538, DOI 10.1016/j.celrep.2017.06.072
   Kim D, 2013, GENOME BIOL, V14, DOI 10.1186/gb-2013-14-4-r36
   Kinnaird A, 2016, NAT REV CANCER, V16, P694, DOI 10.1038/nrc.2016.82
   Kottakis F, 2016, NATURE, V539, P390, DOI 10.1038/nature20132
   Kraus D, 2014, NATURE, V508, P258, DOI 10.1038/nature13198
   Kuang Z, 2014, NAT STRUCT MOL BIOL, V21, P854, DOI 10.1038/nsmb.2881
   Langmead B, 2012, NAT METHODS, V9, P357, DOI [10.1038/NMETH.1923, 10.1038/nmeth.1923]
   Lauberth SM, 2013, CELL, V152, P1021, DOI 10.1016/j.cell.2013.01.052
   Li H, 2009, BIOINFORMATICS, V25, P1754, DOI 10.1093/bioinformatics/btp324
   Liberzon A, 2011, BIOINFORMATICS, V27, P1739, DOI 10.1093/bioinformatics/btr260
   Liu XY, 2016, NATURE, V537, P558, DOI 10.1038/nature19362
   Liu YN, 2017, J GENET GENOMICS, V44, P119, DOI 10.1016/j.jgg.2016.12.004
   Locasale JW, 2013, NAT REV CANCER, V13, P572, DOI 10.1038/nrc3557
   Love MI, 2014, GENOME BIOL, V15, DOI 10.1186/s13059-014-0550-8
   Lu C, 2012, NATURE, V483, P474, DOI 10.1038/nature10860
   Luco RF, 2010, SCIENCE, V327, P996, DOI 10.1126/science.1184208
   Malloy VL, 2013, METABOLISM, V62, P1651, DOI 10.1016/j.metabol.2013.06.012
   McDonald OG, 2017, NAT GENET, V49, P367, DOI 10.1038/ng.3753
   Mehrmohamadi M, 2016, NAT COMMUN, V7, DOI 10.1038/ncomms13666
   Mentch SJ, 2016, ANN NY ACAD SCI, V1363, P91, DOI 10.1111/nyas.12956
   Mentch SJ, 2015, CELL METAB, V22, P861, DOI 10.1016/j.cmet.2015.08.024
   Nagaraj R, 2017, CELL, V168, P210, DOI 10.1016/j.cell.2016.12.026
   Shyh-Chang N, 2013, SCIENCE, V339, P222, DOI 10.1126/science.1226603
   Orlando DA, 2014, CELL REP, V9, P1163, DOI 10.1016/j.celrep.2014.10.018
   Ost A, 2014, CELL, V159, P1352, DOI 10.1016/j.cell.2014.11.005
   Pan M, 2016, NAT CELL BIOL, V18, P1090, DOI 10.1038/ncb3410
   Peng M, 2016, SCIENCE, V354, P481, DOI 10.1126/science.aaf6284
   Piunti A, 2016, SCIENCE, V352, DOI 10.1126/science.aad9780
   Pradeepa MM, 2016, NAT GENET, V48, P681, DOI 10.1038/ng.3550
   Quinlan AR, 2010, BIOINFORMATICS, V26, P841, DOI 10.1093/bioinformatics/btq033
   Radford EJ, 2014, SCIENCE, V345, P785, DOI 10.1126/science.1255903
   Reid MA, 2017, NAT CELL BIOL, V19, P1298, DOI 10.1038/ncb3629
   Rickels R, 2016, MOL CELL, V63, P318, DOI 10.1016/j.molcel.2016.06.018
   Ryall JG, 2015, CELL STEM CELL, V17, P651, DOI 10.1016/j.stem.2015.11.012
   Santos-Rosa H, 2002, NATURE, V419, P407, DOI 10.1038/nature01080
   Sciacovelli M, 2016, NATURE, V537, P544, DOI 10.1038/nature19353
   Sharma U, 2017, CELL METAB, V25, P544, DOI 10.1016/j.cmet.2017.02.003
   Shiraki N, 2014, CELL METAB, V19, P780, DOI 10.1016/j.cmet.2014.03.017
   Sperber H, 2015, NAT CELL BIOL, V17, P1523, DOI 10.1038/ncb3264
   Subramanian A, 2005, P NATL ACAD SCI USA, V102, P15545, DOI 10.1073/pnas.0506580102
   TeSlaa T, 2016, CELL METAB, V24, P485, DOI 10.1016/j.cmet.2016.07.002
   Thienpont B, 2016, NATURE, V537, P63, DOI 10.1038/nature19081
   Ulanovskaya OA, 2013, NAT CHEM BIOL, V9, P300, DOI [10.1038/nchembio.1204, 10.1038/NCHEMBIO.1204]
   Weiner A, 2015, MOL CELL, V58, P371, DOI 10.1016/j.molcel.2015.02.002
   Wong BW, 2017, NATURE, V542, P49, DOI 10.1038/nature21028
   Xie ZY, 2016, MOL CELL, V62, P194, DOI 10.1016/j.molcel.2016.03.036
   Xing HP, 2012, PLOS COMPUT BIOL, V8, DOI 10.1371/journal.pcbi.1002613
   Xu T, 2017, NATURE, V548, P228, DOI 10.1038/nature23475
   Ye CQ, 2017, MOL CELL, V66, P180, DOI 10.1016/j.molcel.2017.02.026
   Zhang BJ, 2016, NATURE, V537, P553, DOI 10.1038/nature19361
   Zhang Y, 2008, GENOME BIOL, V9, DOI 10.1186/gb-2008-9-9-r137
   Zhao M, 2016, NUCLEIC ACIDS RES, V44, pD1023, DOI 10.1093/nar/gkv1268
NR 70
TC 55
Z9 55
U1 1
U2 9
PU NATURE RESEARCH
PI BERLIN
PA HEIDELBERGER PLATZ 3, BERLIN, 14197, GERMANY
SN 2041-1723
J9 NAT COMMUN
JI Nat. Commun.
PD MAY 16
PY 2018
VL 9
AR 1955
DI 10.1038/s41467-018-04426-y
PG 12
WC Multidisciplinary Sciences
WE Science Citation Index Expanded (SCI-EXPANDED)
SC Science & Technology - Other Topics
GA GF9EY
UT WOS:000432280100001
PM 29769529
OA Green Published, Green Submitted, gold
DA 2022-04-10
ER

PT J
AU Yu, N
   Huangyang, PW
   Yang, XH
   Han, X
   Yan, RR
   Jia, HT
   Shang, YF
   Sun, LY
AF Yu, Na
   Huangyang, Peiwei
   Yang, Xiaohan
   Han, Xiao
   Yan, Ruorong
   Jia, Hongti
   Shang, Yongfeng
   Sun, Luyang
TI microRNA-7 Suppresses the Invasive Potential of Breast Cancer Cells and
   Sensitizes Cells to DNA Damages by Targeting Histone Methyltransferase
   SET8
SO JOURNAL OF BIOLOGICAL CHEMISTRY
LA English
DT Article
ID GROWTH; METHYLATION; REPAIR; MONOMETHYLATION; RECOGNITION; PR-SET7;
   GENE; OVEREXPRESSION; REPRESSION; 53BP1
AB SET8 (SET domain containing 8) is a histone H4 lysine 20 (H4K20)-specific monomethyltransferase in higher eukaryotes that exerts diverse functions in transcription regulation, DNA repair, tumor metastasis, and genome integrity. The activity of SET8 is tightly controlled during cell cycle through post-translational modification, including ubiquitination, phosphorylation, and sumoylation. However, how the expression of SET8 is regulated is not fully understood. Here, we report that microRNA-7 is a negative regulator of SET8. We demonstrated that microRNA-7 inhibits H4K20 monomethylation and suppresses epithelial-mesenchymal transition and the invasive potential of breast cancer cells. We showed that microRNA-7 promotes spontaneous DNA damages and sensitizes cells to induced DNA damages. Our experiments provide a molecular mechanism for the regulation of SET8 and extend the biological function of microRNA-7 to DNA damage response, supporting the pursuit of microRNA-7 as a potential target for breast cancer intervention.
C1 [Yu, Na; Huangyang, Peiwei; Yang, Xiaohan; Han, Xiao; Yan, Ruorong; Jia, Hongti; Shang, Yongfeng; Sun, Luyang] Peking Univ, Dept Biochem & Mol Biol, Hlth Sci Ctr, Beijing 100191, Peoples R China.
   [Shang, Yongfeng] Tianjin Med Univ, Tianjin Key Lab Med Epigenet, Tianjin 300070, Peoples R China.
RP Sun, LY (corresponding author), Peking Univ, Dept Biochem & Mol Biol, Hlth Sci Ctr, 38 Xue Yuan Rd, Beijing 100191, Peoples R China.
EM Luyang_sun@hsc.pku.edu.cn
RI Huangyang, Peiwei/AAS-8905-2021; Han, Xiao/A-1109-2017; HUANG,
   YANGPEIWEI/AAS-7683-2021
OI Han, Xiao/0000-0002-5395-4022; HUANG, YANGPEIWEI/0000-0002-9131-3891;
   Han, Xiao/0000-0002-6024-6286
FU National Natural Science Foundation of ChinaNational Natural Science
   Foundation of China (NSFC) [81071673, 91219201, 81130048]; Beijing
   Natural Science FoundationBeijing Natural Science Foundation [5112017,
   5132020]; Ministry of Science and Technology of ChinaMinistry of Science
   and Technology, China [2011CB504204]
FX This work was supported by Grants 81071673 (to L. S.) and 91219201 and
   81130048 (to Y. S.) from the National Natural Science Foundation of
   China, Grants 5112017 and 5132020 (to L. S.) from Beijing Natural
   Science Foundation, and Grant 973 Program 2011CB504204 (to Y. S.) from
   the Ministry of Science and Technology of China.
CR Asangani IA, 2013, MOL CELL, V49, P80, DOI 10.1016/j.molcel.2012.10.008
   Bartel DP, 2009, CELL, V136, P215, DOI 10.1016/j.cell.2009.01.002
   Bartel DP, 2004, CELL, V116, P281, DOI 10.1016/S0092-8674(04)00045-5
   Behm-Ansmant I, 2006, COLD SPRING HARB SYM, V71, P523, DOI 10.1101/sqb.2006.71.013
   Botuyan MV, 2006, CELL, V127, P1361, DOI 10.1016/j.cell.2006.10.043
   Cantone I, 2013, NAT STRUCT MOL BIOL, V20, P282, DOI 10.1038/nsmb.2489
   Centore RC, 2010, MOL CELL, V40, P22, DOI 10.1016/j.molcel.2010.09.015
   Cochrane Dawn R., 2010, Hormones & Cancer, V1, P306, DOI 10.1007/s12672-010-0043-5
   Congdon LM, 2010, J CELL BIOCHEM, V110, P609, DOI 10.1002/jcb.22570
   Driskell I, 2012, EMBO J, V31, P616, DOI 10.1038/emboj.2011.421
   Fedoriw A, 2012, CSH PERSPECT BIOL, V4, DOI 10.1101/cshperspect.a008136
   Giovannetti E, 2012, PLOS ONE, V7, DOI 10.1371/journal.pone.0049145
   Havens CG, 2012, J BIOL CHEM, V287, P11410, DOI 10.1074/jbc.M111.337683
   HAYS SL, 1995, P NATL ACAD SCI USA, V92, P6925, DOI 10.1073/pnas.92.15.6925
   Houston SI, 2008, J BIOL CHEM, V283, P19478, DOI 10.1074/jbc.M710579200
   Iorio MV, 2009, J CLIN ONCOL, V27, P5848, DOI 10.1200/JCO.2009.24.0317
   Jorgensen S, 2007, J CELL BIOL, V179, P1337, DOI 10.1083/jcb.200706150
   Juan AH, 2009, MOL CELL, V36, P61, DOI 10.1016/j.molcel.2009.08.008
   Kalinowski FC, 2012, PLOS ONE, V7, DOI 10.1371/journal.pone.0047067
   Kong D, 2012, ONCOGENE, V31, P3949, DOI 10.1038/onc.2011.558
   Kong XB, 2012, PLOS ONE, V7, DOI [10.1371/journal.pone.0041523, 10.1371/journal.pone.0033381]
   Kredo-Russo S, 2012, EXP DIABETES RES, DOI 10.1155/2012/695214
   Lal A, 2009, NAT STRUCT MOL BIOL, V16, P492, DOI 10.1038/nsmb.1589
   Li ZF, 2011, P NATL ACAD SCI USA, V108, P3116, DOI 10.1073/pnas.1009353108
   Lu JA, 2011, CANCER RES, V71, P225, DOI 10.1158/0008-5472.CAN-10-1850
   Mansour WY, 2013, RADIOTHER ONCOL, V106, P147, DOI 10.1016/j.radonc.2012.10.020
   Moskwa P, 2011, MOL CELL, V41, P210, DOI 10.1016/j.molcel.2010.12.005
   Munoz MC, 2012, J BIOL CHEM, V287, P40618, DOI 10.1074/jbc.M112.410951
   Oda H, 2010, MOL CELL, V40, P364, DOI 10.1016/j.molcel.2010.10.011
   Oda H, 2009, MOL CELL BIOL, V29, P2278, DOI 10.1128/MCB.01768-08
   Okuda H, 2013, CANCER RES, V73, P1434, DOI 10.1158/0008-5472.CAN-12-2037
   Panning B, 1998, CELL, V93, P305, DOI 10.1016/S0092-8674(00)81155-1
   Park JH, 2011, BMC MED GENOMICS, V4, DOI 10.1186/1755-8794-4-82
   Pierce AJ, 1999, GENE DEV, V13, P2633, DOI 10.1101/gad.13.20.2633
   Rai K, 2011, MOL CANCER THER, V10, P1720, DOI 10.1158/1535-7163.MCT-11-0220
   Reddy SDN, 2008, CANCER RES, V68, P8195, DOI 10.1158/0008-5472.CAN-08-2103
   Sanders SL, 2004, CELL, V119, P603, DOI 10.1016/j.cell.2004.11.009
   Schultz LB, 2000, J CELL BIOL, V151, P1381, DOI 10.1083/jcb.151.7.1381
   Shi XB, 2007, MOL CELL, V27, P636, DOI 10.1016/j.molcel.2007.07.012
   Skalsky RL, 2011, PLOS ONE, V6, DOI 10.1371/journal.pone.0024248
   Solomon DA, 2004, J CELL BIOL, V166, P455, DOI 10.1083/jcb.200312048
   Sun GQ, 2011, NAT COMMUN, V2, DOI 10.1038/ncomms1532
   Varambally S, 2008, SCIENCE, V322, P1695, DOI 10.1126/science.1165395
   Wakabayashi K, 2009, MOL CELL BIOL, V29, P3544, DOI 10.1128/MCB.01856-08
   Webster RJ, 2009, J BIOL CHEM, V284, P5731, DOI 10.1074/jbc.M804280200
   Wu SM, 2011, CELL CYCLE, V10, P68, DOI 10.4161/cc.10.1.14363
   Xiong SD, 2011, INT J BIOL SCI, V7, P805, DOI 10.7150/ijbs.7.805
   Yang F, 2012, EMBO J, V31, P110, DOI 10.1038/emboj.2011.364
   Youn JI, 2013, NAT IMMUNOL, V14, P211, DOI 10.1038/ni.2526
   Zhang N, 2013, ONCOGENE, V32, P5078, DOI 10.1038/onc.2012.526
   Zhao X, 2013, ONCOGENE, V32, P1363, DOI 10.1038/onc.2012.156
NR 51
TC 34
Z9 41
U1 1
U2 20
PU AMER SOC BIOCHEMISTRY MOLECULAR BIOLOGY INC
PI ROCKVILLE
PA 11200 ROCKVILLE PIKE, SUITE 302, ROCKVILLE, MD, UNITED STATES
SN 0021-9258
EI 1083-351X
J9 J BIOL CHEM
JI J. Biol. Chem.
PD JUL 5
PY 2013
VL 288
IS 27
BP 19633
EP 19642
DI 10.1074/jbc.M113.475657
PG 10
WC Biochemistry & Molecular Biology
WE Science Citation Index Expanded (SCI-EXPANDED)
SC Biochemistry & Molecular Biology
GA 179JG
UT WOS:000321515800029
PM 23720754
OA hybrid, Green Published
DA 2022-04-10
ER

PT J
AU Yuan, Y
   Wang, Q
   Paulk, J
   Kubicek, S
   Kemp, MM
   Adams, DJ
   Shamji, AF
   Wagner, BK
   Schreiber, SL
AF Yuan, Yuan
   Wang, Qiu
   Paulk, Joshiawa
   Kubicek, Stefan
   Kemp, Melissa M.
   Adams, Drew J.
   Shamji, Alykhan F.
   Wagner, Bridget K.
   Schreiber, Stuart L.
TI A Small-Molecule Probe of the Histone Methyltransferase G9a Induces
   Cellular Senescence in Pancreatic Adenocarcinoma
SO ACS CHEMICAL BIOLOGY
LA English
DT Article
ID dna damage RESPONSE; CANCER; CELLS; METHYLATION; INHIBITOR; ABSENCE; ATM
AB post-translational modification of histones alter chromatin structure and play key roles in gene expression and specification of cell states. Small molecules that target chromatin-modifying enzymes selectively are useful as probes and have promise as therapeutics, although very few are currently available. G9a (also named euchromatin histone methyltransferase 2 (EHMT2)) catalyzes methylation of lysine 9 on histone H3 (H3K9), a modification linked to aberrant silencing of tumor-suppressor gene, among others. Here, we report the discovery of a novel histone methyltransferase inhibitor, BRD4770. This compound reduced cellular levels of di- and trimethylated H3K9 without inducing apoptosis, induced senescence, and inhibited both anchorage-dependent and -independent proliferation in the pancreatic cancer cell line PANC-1. ATM-pathway activation, caused by either genetic or small-molecule inhibition of G9a, may mediate BRD4770-induced cell senescence. BRD4770 may be a useful tool to study G9a and its role in senescence and cancer cell biology.
C1 [Yuan, Yuan; Wang, Qiu; Paulk, Joshiawa; Kubicek, Stefan; Kemp, Melissa M.; Adams, Drew J.; Shamji, Alykhan F.; Wagner, Bridget K.; Schreiber, Stuart L.] Broad Inst, Chem Biol Program, Cambridge, MA 02142 USA.
   [Schreiber, Stuart L.] Broad Inst, Howard Hughes Med Inst, Cambridge, MA 02142 USA.
   [Yuan, Yuan; Schreiber, Stuart L.] Harvard Univ, Dept Chem & Chem Biol, Cambridge, MA 02138 USA.
   [Paulk, Joshiawa; Schreiber, Stuart L.] Harvard Univ, Chem Biol Training Program, Boston, MA 02115 USA.
RP Schreiber, SL (corresponding author), Broad Inst, Chem Biol Program, 7 Cambridge Ctr, Cambridge, MA 02142 USA.
EM ashamji@broadinstitute.org; bwagner@broadinstitute.org;
   stuart_schreiber@harvard.edu
RI Kubicek, Stefan/C-2089-2017
OI Kubicek, Stefan/0000-0003-0855-8343
FU National Institute of General Medicine SciencesUnited States Department
   of Health & Human ServicesNational Institutes of Health (NIH) - USANIH
   National Institute of General Medical Sciences (NIGMS) [GM38627];
   NATIONAL INSTITUTE OF GENERAL MEDICAL SCIENCESUnited States Department
   of Health & Human ServicesNational Institutes of Health (NIH) - USANIH
   National Institute of General Medical Sciences (NIGMS) [R37GM038627,
   R01GM038627] Funding Source: NIH RePORTER
FX We thank L. Briggs for technical assistance, J. Jaffe and S. Carr for
   advice and assistance with proteomic analysis of histone methylation,
   and A. Stern for helpful suggestions. This work was supported by the
   National Institute of General Medicine Sciences (GM38627 to S.L.S.).
   S.L.S. is a Howard Hughes Medical Institute Investigator.
CR Albert M, 2010, SEMIN CELL DEV BIOL, V21, P209, DOI 10.1016/j.semcdb.2009.10.007
   Bakkenist CJ, 2003, NATURE, V421, P499, DOI 10.1038/nature01368
   Bonilla CY, 2008, MOL CELL, V30, P267, DOI 10.1016/j.molcel.2008.03.023
   Campisi J, 2007, NAT REV MOL CELL BIO, V8, P729, DOI 10.1038/nrm2233
   Chen MW, 2010, CANCER RES, V70, P7830, DOI 10.1158/0008-5472.CAN-10-0833
   Collado M, 2007, CELL, V130, P223, DOI 10.1016/j.cell.2007.07.003
   Greiner D, 2005, NAT CHEM BIOL, V1, P143, DOI 10.1038/nchembio721
   Huang J, 2010, J BIOL CHEM, V285, P9636, DOI 10.1074/jbc.M109.062588
   Kondo Y, 2008, PLOS ONE, V3, DOI 10.1371/journal.pone.0002037
   Kristensen LS, 2009, EUR J PHARMACOL, V625, P131, DOI 10.1016/j.ejphar.2009.10.011
   Kubicek S, 2007, MOL CELL, V25, P473, DOI 10.1016/j.molcel.2007.01.017
   Lee Jong-Soo, 2007, Cancer Res Treat, V39, P125, DOI 10.4143/crt.2007.39.3.125
   Pospelova TV, 2009, CELL CYCLE, V8, P4112, DOI 10.4161/cc.8.24.10215
   Rogakou EP, 1998, J BIOL CHEM, V273, P5858, DOI 10.1074/jbc.273.10.5858
   Rotman G, 1999, ONCOGENE, V18, P6135, DOI 10.1038/sj.onc.1203124
   Sipos B, 2003, VIRCHOWS ARCH, V442, P444, DOI 10.1007/s00428-003-0784-4
   Soutoglou E, 2008, SCIENCE, V320, P1507, DOI [10.1126/science.1159051, 10.1126/science.ll59051]
   Tachibana M, 2005, GENE DEV, V19, P815, DOI 10.1101/gad.1284005
   Tachibana M, 2002, GENE DEV, V16, P1779, DOI 10.1101/gad.989402
   Vedadi M, 2011, NAT CHEM BIOL, V7, P566, DOI [10.1038/NCHEMBIO.599, 10.1038/nchembio.599]
   von Zglinicki T, 2005, MECH AGEING DEV, V126, P111, DOI 10.1016/j.mad.2004.09.034
   Yoo CB, 2006, NAT REV DRUG DISCOV, V5, P37, DOI 10.1038/nrd1930
NR 22
TC 110
Z9 116
U1 0
U2 44
PU AMER CHEMICAL SOC
PI WASHINGTON
PA 1155 16TH ST, NW, WASHINGTON, DC 20036 USA
SN 1554-8929
J9 ACS CHEM BIOL
JI ACS Chem. Biol.
PD JUL
PY 2012
VL 7
IS 7
BP 1152
EP 1157
DI 10.1021/cb300139y
PG 6
WC Biochemistry & Molecular Biology
WE Science Citation Index Expanded (SCI-EXPANDED)
SC Biochemistry & Molecular Biology
GA 975VU
UT WOS:000306540400002
PM 22536950
OA Green Published
DA 2022-04-10
ER

PT S
AU Da Costa, IC
   Schmidt, CK
AF Da Costa, Isabelle C.
   Schmidt, Christine K.
BE Wu, Q
TI Ubiquitin-like proteins in the DNA damage response: the next generation
SO GUARDIANS OF THE GENOME: DNA DAMAGE AND REPAIR
SE Essays in Biochemistry
LA English
DT Review; Book Chapter
ID STRAND-BREAK REPAIR; ISG15 CONJUGATION; CRYSTAL-STRUCTURE; FAT10;
   ENZYME; IDENTIFICATION; UBL5; CANCER; SIGNAL; CELLS
AB DNA suffers constant insult from a variety of endogenous and exogenous sources. To deal with the arising lesions, cells have evolved complex and coordinated pathway, collectively termed the DNA damage response (DDR). Importantly, an improper DDR can lead to genome instability, premature ageing and human diseases, including cancer as well as neurodegenerative disorders. As a crucial process for cell survival, regulation of the DDR is multi-layered and includes several post-translational modification. Since the discovery of ubiquitinationin 1975 and the ubiquitination cascade in the early 1980s, a number of ubiquitin-like proteins (UBLs) have been identified as post-translational modifiers. However, while the importance of ubiquitinationand the UBLs sumoylationand NEDD8 in DNA damage repair and signalling is well established, the roles of the remaining UBLs in the DDR are only starting to be uncovered. Herein, we revise the current status of the UBLs ISG15, UBL5, FAT10 and UFM1 as emerging co-regulators of DDR processes. In fact, it is becoming clear that these post-translational modifiers play important pleiotropic roles in DNA damage and/or associated stress-related cellular responses. Expanding our understanding of the molecular mechanism underlying these emerging UBL functions will be fundamental for enhancing our knowledge of the DDR and potentially provide new therapeutic strategies for various human diseases including cancer.
C1 [Da Costa, Isabelle C.; Schmidt, Christine K.] Univ Manchester, Fac Biol Med & Hlth, Sch Med Sci, Manchester Canc Res Ctr,Div Canc Sci, 555 Wilmslow Rd, Manchester M20 4GJ, Lancs, England.
RP Schmidt, CK (corresponding author), Univ Manchester, Fac Biol Med & Hlth, Sch Med Sci, Manchester Canc Res Ctr,Div Canc Sci, 555 Wilmslow Rd, Manchester M20 4GJ, Lancs, England.
EM christine.schmidt@manchester.ac.uk
RI Schmidt, Christine/AAF-2625-2021
OI Schmidt, Christine/0000-0002-8363-7933; Da Costa, Isabelle
   Cristine/0000-0002-1037-9216
FU University of Manchester President's Doctoral Scholar Award; BBSRC David
   Phillips FellowshipUK Research & Innovation (UKRI)Biotechnology and
   Biological Sciences Research Council (BBSRC) [BB/N019997/1]
FX We thank members of the Genome Stability Lab, particularly Zac Sandy,
   for useful discussions and acknowledge funding from a University of
   Manchester President's Doctoral Scholar Award and BBSRC David Phillips
   Fellowship [grant number BB/N019997/1].
CR Ackermann L, 2016, NAT STRUCT MOL BIOL, V23, P995, DOI 10.1038/nsmb.3296
   AICHEM A, 2018, NAT COMMUN, V9, P1
   Aichem A, 2016, INT J BIOCHEM CELL B, V79, P451, DOI 10.1016/j.biocel.2016.07.001
   Aichem A, 2012, J CELL SCI, V125, P4576, DOI 10.1242/jcs.107789
   Aichem A, 2010, NAT COMMUN, V1, DOI 10.1038/ncomms1012
   Ammon T, 2014, J MOL CELL BIOL, V6, P312, DOI 10.1093/jmcb/mju026
   Bacik JP, 2010, J BIOL CHEM, V285, P20273, DOI 10.1074/jbc.M110.102921
   Bates EFM, 1997, EUR J IMMUNOL, V27, P2471, DOI 10.1002/eji.1830271002
   Bialas J, 2015, PLOS ONE, V10, DOI 10.1371/journal.pone.0120329
   Blackford AN, 2020, TRENDS BIOCHEM SCI, V45, P321, DOI 10.1016/j.tibs.2019.12.010
   Blackford AN, 2017, MOL CELL, V66, P801, DOI 10.1016/j.molcel.2017.05.015
   BLOMSTROM DC, 1986, J BIOL CHEM, V261, P8811
   Brown JS, 2017, CANCER DISCOV, V7, P20, DOI 10.1158/2159-8290.CD-16-0860
   Buchsbaum S, 2012, MOL BIOL CELL, V23, P225, DOI 10.1091/mbc.E11-07-0609
   Cai YF, 2015, PLOS GENET, V11, DOI 10.1371/journal.pgen.1005643
   Canaan A, 2006, MOL CELL BIOL, V26, P5180, DOI 10.1128/MCB.00966-05
   Cappadocia L, 2018, CHEM REV, V118, P889, DOI 10.1021/acs.chemrev.6b00737
   Chanarat S, 2018, TRENDS BIOCHEM SCI, V43, P896, DOI 10.1016/j.tibs.2018.09.001
   Chen ZC, 2018, MOL MED REP, V17, P7487, DOI 10.3892/mmr.2018.8843
   Chiu YH, 2007, MOL CELL, V27, P1014, DOI 10.1016/j.molcel.2007.08.020
   Ciccia A, 2010, MOL CELL, V40, P179, DOI 10.1016/j.molcel.2010.09.019
   Clague MJ, 2019, NAT REV MOL CELL BIO, V20, P338, DOI 10.1038/s41580-019-0099-1
   Cort JR, 2002, PROTEINS, V48, P733, DOI 10.1002/prot.10197
   Daniel J, 2014, CELLS-BASEL, V3, P627, DOI 10.3390/cells3020627
   Dao CT, 2005, FRONT BIOSCI-LANDMRK, V10, P2701, DOI 10.2741/1730
   Dastur A, 2006, J BIOL CHEM, V281, P4334, DOI 10.1074/jbc.M512830200
   Dittmar GAG, 2002, SCIENCE, V295, P2442, DOI 10.1126/science.1069989
   Dokmanovic M, 2002, CANCER BIOL THER, V1, P24, DOI 10.4161/cbt.1.1.35
   Durfee LA, 2008, J BIOL CHEM, V283, P23895, DOI 10.1074/jbc.M804069200
   Durfee LA, 2010, MOL CELL, V38, P722, DOI 10.1016/j.molcel.2010.05.002
   Fan JB, 2015, SCI REP-UK, V5, DOI 10.1038/srep12704
   Fan WF, 1996, IMMUNOGENETICS, V44, P97, DOI 10.1007/BF02660056
   Friedmann JS, 2001, GENOMICS, V71, P252, DOI 10.1006/geno.2000.6439
   Gavin JM, 2012, J BIOL CHEM, V287, P15512, DOI 10.1074/jbc.M111.336198
   Gentile M, 2003, NUCLEIC ACIDS RES, V31, P4779, DOI 10.1093/nar/gkg675
   Gerakis Y, 2019, TRENDS CELL BIOL, V29, P974, DOI 10.1016/j.tcb.2019.09.005
   Giannakopoulos NV, 2005, BIOCHEM BIOPH RES CO, V336, P496, DOI 10.1016/j.bbrc.2005.08.132
   Gu X, 2007, MOL BIOL REP, V34, P183, DOI 10.1007/s11033-006-9033-7
   HAAS AL, 1987, J BIOL CHEM, V262, P11315
   Hanahan D, 2011, CELL, V144, P646, DOI 10.1016/j.cell.2011.02.013
   Harrigan JA, 2018, NAT REV DRUG DISCOV, V17, P57, DOI 10.1038/nrd.2017.152
   Hipp MS, 2005, MOL CELL BIOL, V25, P3483, DOI 10.1128/MCB.25.9.3483-3491.2005
   Hochstrasser M, 2009, NATURE, V458, P422, DOI 10.1038/nature07958
   Huang YF, 2014, CELL CYCLE, V13, P2200, DOI 10.4161/cc.29209
   Huang YF, 2014, ONCOTARGET, V5, P5808, DOI 10.18632/oncotarget.2199
   Huo Y, 2017, ONCOTARGET, V8, P107452, DOI 10.18632/oncotarget.22488
   Jackson SP, 2009, NATURE, V461, P1071, DOI 10.1038/nature08467
   Jeon YJ, 2017, MOL CELLS, V40, P83, DOI 10.14348/molcells.2017.0027
   Jeon YJ, 2012, J CLIN INVEST, V122, P2622, DOI 10.1172/JCI61762
   Jin JP, 2007, NATURE, V447, P1135, DOI 10.1038/nature05902
   Kang SH, 2007, J BIOL CHEM, V282, P5256, DOI 10.1074/jbc.M610590200
   Kim KI, 2004, MOL CELL BIOL, V24, P9592, DOI 10.1128/MCB.24.21.9592-9600.2004
   Kim KI, 2006, MOL CELL BIOL, V26, P472, DOI 10.1128/MCB.26.2.472-479.2006
   Komatsu M, 2004, EMBO J, V23, P1977, DOI 10.1038/sj.emboj.7600205
   KORANT BD, 1984, J BIOL CHEM, V259, P4835
   Krug RM, 2005, METHOD ENZYMOL, V398, P32, DOI 10.1016/S0076-6879(05)98004-X
   Kuffour EO, 2019, MBIO, V10, DOI 10.1128/mBio.01342-19
   LEE L, 2019, BIORXIV, V1, P46477
   Leng L, 2014, J PROTEOME RES, V13, P268, DOI 10.1021/pr400395k
   Li TW, 2011, ARCH BIOCHEM BIOPHYS, V509, P164, DOI 10.1016/j.abb.2011.02.017
   Liang JR, 2020, CELL, V180, P1160, DOI 10.1016/j.cell.2020.02.017
   Lim CB, 2006, CELL DIV, V1, DOI 10.1186/1747-1028-1-20
   Liu L, 2014, ONCOGENE, V33, P909, DOI 10.1038/onc.2013.236
   Liu MJ, 2004, J INTERF CYTOK RES, V24, P647, DOI 10.1089/jir.2004.24.647
   Liu YC, 1999, P NATL ACAD SCI USA, V96, P4313, DOI 10.1073/pnas.96.8.4313
   Lombardi PM, 2017, J MOL MED, V95, P799, DOI 10.1007/s00109-017-1561-1
   Luders J, 2003, EMBO REP, V4, P1169, DOI 10.1038/sj.embor.7400025
   Lukasiak S, 2008, ONCOGENE, V27, P6068, DOI 10.1038/onc.2008.201
   Malakhov MP, 2002, J BIOL CHEM, V277, P9976, DOI 10.1074/jbc.M109078200
   Malakhov MP, 2003, J BIOL CHEM, V278, P16608, DOI 10.1074/jbc.M208435200
   Malakhova O, 2002, J BIOL CHEM, V277, P14703, DOI 10.1074/jbc.M111527200
   McNally T, 2003, PROTEIN SCI, V12, P1562, DOI 10.1110/ps.0382803
   Mizushima T, 2007, BIOCHEM BIOPH RES CO, V362, P1079, DOI 10.1016/j.bbrc.2007.08.129
   Morales DJ, 2013, J MOL BIOL, V425, P4995, DOI 10.1016/j.jmb.2013.09.041
   Nakad R, 2016, FRONT GENET, V7, DOI 10.3389/fgene.2016.00147
   Narasimhan J, 2005, J BIOL CHEM, V280, P27356, DOI 10.1074/jbc.M502814200
   Oka Y, 2015, EMBO J, V34, P1385, DOI 10.15252/embj.201490376
   Oka Y, 2014, EMBO REP, V15, P956, DOI 10.15252/embr.201438679
   Okumura F, 2007, GENE DEV, V21, P255, DOI 10.1101/gad.1521607
   Park JH, 2016, NAT COMMUN, V7, DOI 10.1038/ncomms12513
   Park JM, 2014, MOL CELL, V54, P626, DOI 10.1016/j.molcel.2014.03.031
   Pelzer C, 2007, J BIOL CHEM, V282, P23010, DOI 10.1074/jbc.C700111200
   Pilie PG, 2019, NAT REV CLIN ONCOL, V16, P81, DOI 10.1038/s41571-018-0114-z
   Pirone L, 2017, SCI REP-UK, V7, DOI 10.1038/srep40756
   Potter JL, 1999, J BIOL CHEM, V274, P25061, DOI 10.1074/jbc.274.35.25061
   Qin B, 2019, NAT COMMUN, V10, DOI 10.1038/s41467-019-09175-0
   Raasi S, 2001, J BIOL CHEM, V276, P35334, DOI 10.1074/jbc.M105139200
   Raasi S, 1999, EUR J IMMUNOL, V29, P4030, DOI 10.1002/(SICI)1521-4141(199912)29:12<4030::AID-IMMU4030>3.0.CO;2-Y
   Ren JW, 2011, J CELL SCI, V124, P3665, DOI 10.1242/jcs.087403
   Ren JW, 2006, J BIOL CHEM, V281, P11413, DOI 10.1074/jbc.M507218200
   Ross MJ, 2006, J AM SOC NEPHROL, V17, P996, DOI 10.1681/ASN.2005070692
   Schmidt CK, 2015, NAT CELL BIOL, V17, P1458, DOI 10.1038/ncb3260
   Schmidtke G, 2014, BBA-MOL CELL RES, V1843, P97, DOI 10.1016/j.bbamcr.2013.01.009
   Schwertman P, 2016, NAT REV MOL CELL BIO, V17, P379, DOI 10.1038/nrm.2016.58
   Sulli G, 2012, NAT REV CANCER, V12, DOI 10.1038/nrc3344
   Sveda M, 2013, BIOCHEM BIOPH RES CO, V436, P240, DOI 10.1016/j.bbrc.2013.05.083
   Takeuchi T, 2005, BIOCHEM BIOPH RES CO, V336, P9, DOI 10.1016/j.bbrc.2005.08.034
   Takeuchi T, 2006, BIOCHEM BIOPH RES CO, V348, P473, DOI 10.1016/j.bbrc.2006.07.076
   Tatsumi K, 2010, J BIOL CHEM, V285, P5417, DOI 10.1074/jbc.M109.036814
   Theng SS, 2014, P NATL ACAD SCI USA, V111, pE5282, DOI 10.1073/pnas.1403383111
   Uhlen M, 2015, SCIENCE, V347, DOI 10.1126/science.1260419
   Walsh CT, 2005, ANGEW CHEM INT EDIT, V44, P7342, DOI 10.1002/anie.200501023
   Wang ZF, 2019, NUCLEIC ACIDS RES, V47, P4124, DOI 10.1093/nar/gkz110
   Wilkinson CRM, 2004, CURR BIOL, V14, P2283, DOI 10.1016/j.cub.2004.11.058
   Wong JJY, 2006, P NATL ACAD SCI USA, V103, P10735, DOI 10.1073/pnas.0600397103
   Yang JW, 2015, FRONT GENET, V6, DOI 10.3389/fgene.2015.00344
   Yashiroda H, 2004, GENES CELLS, V9, P1189, DOI 10.1111/j.1365-2443.2004.00807.x
   Yoo HM, 2014, MOL CELL, V56, P261, DOI 10.1016/j.molcel.2014.08.007
   Zhang DW, 2006, ONCOGENE, V25, P2318, DOI 10.1038/sj.onc.1209220
   Zhang YL, 2016, J IMMUNOL, V197, P824, DOI 10.4049/jimmunol.1501563
   Zhao C, 2005, P NATL ACAD SCI USA, V102, P10200, DOI 10.1073/pnas.0504754102
   Zheng N, 2017, ANNU REV BIOCHEM, V86, P129, DOI 10.1146/annurev-biochem-060815-014922
   Zou WG, 2006, J BIOL CHEM, V281, P3989, DOI 10.1074/jbc.M510787200
NR 113
TC 4
Z9 4
U1 0
U2 8
PU PORTLAND PRESS LTD
PI LONDON
PA 5TH FL, 90 HIGH HOLBORN, LONDON, WC1V 6LJ, ENGLAND
SN 0071-1365
EI 1744-1358
J9 ESSAYS BIOCHEM
JI Essays Biochem.
PY 2020
VL 64
IS 5
BP 737
EP 752
DI 10.1042/EBC20190095
PG 16
WC Biochemistry & Molecular Biology; Medicine, Research & Experimental
WE Book Citation Index – Science (BKCI-S); Science Citation Index Expanded (SCI-EXPANDED)
SC Biochemistry & Molecular Biology; Research & Experimental Medicine
GA BQ6IP
UT WOS:000611913500005
PM 32451552
DA 2022-04-10
ER

PT J
AU Abbas, A
   Witte, T
   Patterson, WL
   Fahrmann, JF
   Guo, K
   Hur, J
   Hardman, WE
   Georgel, PT
AF Abbas, Ata
   Witte, Theodore
   Patterson, William L., III
   Fahrmann, Johannes F.
   Guo, Kai
   Hur, Junguk
   Hardman, W. Elaine
   Georgel, Philippe T.
TI Epigenetic Reprogramming Mediated by Maternal Diet Rich in Omega-3 Fatty
   Acids Protects From Breast Cancer Development in F1 Offspring
SO FRONTIERS IN CELL AND DEVELOPMENTAL BIOLOGY
LA English
DT Article
DE epigenetic changes; histone post-translational modification;
   maternal diet; breast cancer prevention; omega-3 fatty acids
ID N-3 FATTY-ACIDS; RATIO; OMEGA-3; INFLAMMATION; NUTRITION; HEALTH;
   GROWTH; RISK
AB Diets rich in omega-3 fatty acids (FA) have been associated with lowered risks of developing certain types of cancers. We earlier reported that in transgenic mice prone to develop breast cancer (BCa), a diet supplemented with canola oil, rich in omega-3-rich FA (as opposed to an omega-6-rich diet containing corn oil), reduced the risk of developing BCa, and also significantly reduced the incidence of BCa in F1 offspring. To investigate the underlying mechanism of the cancer protective effect of canola oil in the F1 generation, we designed and performed the present study with the same diets using BALB/c mice to remove any possible effect of the transgene. First, we observed epigenetic changes at the genome-wide scale in F1 offspring of mothers fed diets containing omega-3 FAs, including a significant increase in acetylation of H3K18 histone mark and a decrease in H3K4me2 mark on nucleosomes around transcription start sites. These epigenetic modifications contribute to differential gene expressions associated with various pathway and molecular mechanism involved in preventing cancer development, including p53 pathway, G2M checkpoint, DNA repair, inflammatory response, and apoptosis. When offspring mice were exposed to 7,12-Dimethylbenz(a)anthracene (DMBA), the group of mice exposed to a canola oil (with omega 3 FAs)-rich maternal diet showed delayed mortality, increased survival, reduced lateral tumor growth, and smaller tumor size. Remarkably, various genes, including BRCA genes, appear to be epigenetically re-programmed to poise genes to be ready for a rapid transcriptional activation due to the canola oil-rich maternal diet. This ability to respond rapidly due to epigenetic potentiation appeared to contribute to and promote protection against breast cancer after carcinogen exposure.
C1 [Abbas, Ata; Georgel, Philippe T.] Marshall Univ, Dept Biol Sci, Huntington, WV 25755 USA.
   [Abbas, Ata; Patterson, William L., III; Georgel, Philippe T.] Marshall Univ, Cell Differentiat & Dev Ctr, Huntington, WV 25755 USA.
   [Witte, Theodore; Patterson, William L., III; Fahrmann, Johannes F.; Hardman, W. Elaine; Georgel, Philippe T.] Marshall Univ, Sch Med, Dept Biochem & Microbiol, Huntington, WV 25755 USA.
   [Guo, Kai; Hur, Junguk] Univ North Dakota, Sch Med & Hlth Sci, Dept Biomed Sci, Grand Forks, ND USA.
   [Abbas, Ata] Case Western Reserve Univ, Dept Med, Div Hematol & Oncol, Cleveland, OH 44106 USA.
   [Fahrmann, Johannes F.] Univ Texas MD Anderson Canc Ctr, Dept Clin Canc Prevent, Houston, TX 77030 USA.
RP Georgel, PT (corresponding author), Marshall Univ, Dept Biol Sci, Huntington, WV 25755 USA.; Georgel, PT (corresponding author), Marshall Univ, Cell Differentiat & Dev Ctr, Huntington, WV 25755 USA.; Georgel, PT (corresponding author), Marshall Univ, Sch Med, Dept Biochem & Microbiol, Huntington, WV 25755 USA.
EM georgel@marshall.edu
FU DOD grant [BC096996P1]; NIHUnited States Department of Health & Human
   ServicesNational Institutes of Health (NIH) - USA [CA90890, CA122906];
   NIH COBRE grant [5P20RR-020180]
FX This work was supported in part by a DOD grant #BC096996P1 "Maternal
   Consumption of Omega 3 Fatty Acids to Reduce Breast Cancer Risk in
   Offspring" (WH, AA, TW, WP, JF, and PG) and NIH grants CA90890 and
   CA122906, and NIH COBRE grant 5P20RR-020180 (PG).
CR Abbas A, 2016, BIOCHEM CELL BIOL, V94, P71, DOI 10.1139/bcb-2015-0038
   Abbas A, 2013, BIOCHEM CELL BIOL, V91, P361, DOI 10.1139/bcb-2012-0044
   Abel S, 2014, P NUTR SOC, V73, P361, DOI 10.1017/S0029665114000585
   Amatruda M, 2019, INT J MOL SCI, V20, DOI 10.3390/ijms20092118
   Bishop KS, 2015, NUTRIENTS, V7, P922, DOI 10.3390/nu7020922
   Boskovic A, 2018, ANNU REV GENET, V52, P21, DOI 10.1146/annurev-genet-120417-031404
   Ceccarelli V, 2020, BBA-GENE REGUL MECH, V1863, DOI 10.1016/j.bbagrm.2020.194481
   Choi SW, 2010, ADV NUTR, V1, P8, DOI 10.3945/an.110.1004
   da Cruz RS, 2020, FRONT NUTR, V7, DOI 10.3389/fnut.2020.00093
   DiNicolantonio JJ, 2018, OPEN HEART, V5, DOI 10.1136/openhrt-2018-000946
   Diorio C, 2014, CANCER CAUSE CONTROL, V25, P339, DOI 10.1007/s10552-013-0335-5
   Donovan MG, 2020, FRONT NUTR, V7, DOI 10.3389/fnut.2020.571455
   Fleming TP, 2018, LANCET, V391, P1842, DOI [10.1016/s0140-6736(18)30312-x, 10.1016/S0140-6736(18)30312-X]
   Galdieri L, 2012, J BIOL CHEM, V287, P23865, DOI 10.1074/jbc.M112.380519
   Glick NR, 2013, J EVID-BASED INTEGR, V18, P268, DOI 10.1177/2156587213488788
   Candela CG, 2011, NUTR HOSP, V26, P323, DOI [10.1590/S0212-16112011000200013, 10.3305/nh.2011.26.2.5117]
   Gonzalez-Becerra K, 2019, LIPIDS HEALTH DIS, V18, DOI 10.1186/s12944-019-1120-6
   Hardman WE, 2007, NUTR CANCER, V57, P177, DOI 10.1080/01635580701277445
   Hardman WE, 2014, NUTR RES PRACT, V8, P233, DOI 10.4162/nrp.2014.8.3.233
   Hardman WE, 2004, J NUTR, V134, p3427S, DOI 10.1093/jn/134.12.3427S
   Hardman WE, 1999, BRIT J CANCER, V81, P440, DOI 10.1038/sj.bjc.6690713
   Heard E, 2014, CELL, V157, P95, DOI 10.1016/j.cell.2014.02.045
   Horsthemke B, 2018, NAT COMMUN, V9, DOI 10.1038/s41467-018-05445-5
   Huang YC, 1996, LIPIDS, V31, pS313, DOI 10.1007/BF02637099
   Ion G, 2010, BMC CANCER, V10, DOI 10.1186/1471-2407-10-81
   Jenuwein T, 2001, SCIENCE, V293, P1074, DOI 10.1126/science.1063127
   Kang JX, 2013, CANCER METAST REV, V32, P201, DOI 10.1007/s10555-012-9401-9
   KARMALI RA, 1993, PROSTAG LEUKOTR ESS, V48, P309, DOI 10.1016/0952-3278(93)90221-H
   Koh YC, 2020, J FOOD DRUG ANAL, V28, P14, DOI 10.1016/j.jfda.2019.11.001
   Li JM, 2018, FOOD FUNCT, V9, P5768, DOI 10.1039/c8fo01006d
   Liberzon A, 2011, BIOINFORMATICS, V27, P1739, DOI 10.1093/bioinformatics/btr260
   Liu XW, 1997, GENE DEV, V11, P179, DOI 10.1101/gad.11.2.179
   Lunn J, 2006, NUTR BULL, V31, P178, DOI 10.1111/j.1467-3010.2006.00571.x
   Mokbel K, 2019, IN VIVO, V33, P983, DOI 10.21873/invivo.11568
   Nindrea Ricvan Dana, 2019, Asian Pac J Cancer Prev, V20, P1321, DOI 10.31557/APJCP.2019.20.5.1321
   Nindrea Ricvan Dana, 2019, Asian Pac J Cancer Prev, V20, P327, DOI 10.31557/APJCP.2019.20.2.327
   Patterson WL, 2014, BIOCHEM CELL BIOL, V92, P321, DOI 10.1139/bcb-2013-0127
   Pizato N, 2005, NUTR CANCER, V53, P194, DOI 10.1207/s15327914nc5302_8
   Remely M, 2015, BRIT J PHARMACOL, V172, P2756, DOI 10.1111/bph.12854
   Saini RK, 2020, PHARMACOL RES, V157, DOI 10.1016/j.phrs.2020.104830
   Simopoulos AP, 2016, NUTRIENTS, V8, DOI 10.3390/nu8030128
   Simopoulos AP, 2009, WORLD REV NUTR DIET, V100, P1, DOI 10.1159/000235706
   Steck SE, 2020, NAT REV CANCER, V20, P125, DOI 10.1038/s41568-019-0227-4
   Subramanian A, 2005, P NATL ACAD SCI USA, V102, P15545, DOI 10.1073/pnas.0506580102
   Syed DN, 2008, CANCER LETT, V265, P167, DOI 10.1016/j.canlet.2008.02.050
   Tremblay BL, 2017, CLIN epigenetic, V9, DOI 10.1186/s13148-017-0345-3
   Turati F, 2015, BRIT J NUTR, V113, pS102, DOI 10.1017/S0007114515000148
   Vanamala J, 2017, CRIT REV FOOD SCI, V57, P2573, DOI 10.1080/10408398.2015.1028023
   WILLUMSEN N, 1993, LIPIDS, V28, P683, DOI 10.1007/BF02535987
   Witte TR, 2015, LIPIDS, V50, P437, DOI 10.1007/s11745-015-4011-2
   Xavier MJ, 2019, HUM REPROD UPDATE, V25, P519, DOI 10.1093/humupd/dmz017
   Yurko-Mauro K, 2020, NUTRIENTS, V12, DOI 10.3390/nu12061647
   Zanoaga O, 2018, EXP THER MED, V15, P1167, DOI 10.3892/etm.2017.5515
NR 53
TC 2
Z9 3
U1 1
U2 5
PU FRONTIERS MEDIA SA
PI LAUSANNE
PA AVENUE DU TRIBUNAL FEDERAL 34, LAUSANNE, CH-1015, SWITZERLAND
SN 2296-634X
J9 FRONT CELL DEV BIOL
JI Front. Cell. Dev. Biol.
PD JUN 10
PY 2021
VL 9
AR 682593
DI 10.3389/fcell.2021.682593
PG 10
WC Cell Biology; Developmental Biology
WE Science Citation Index Expanded (SCI-EXPANDED)
SC Cell Biology; Developmental Biology
GA SX2IQ
UT WOS:000665034600001
PM 34179012
OA Green Published, gold
DA 2022-04-10
ER

PT J
AU Wan, BB
   Wang, XR
   Zhou, YB
   Zhang, X
   Huo, KK
   Han, ZG
AF Wan, Bingbing
   Wang, Xin-Rong
   Zhou, Yu-Bo
   Zhang, Xin
   Huo, Keke
   Han, Ze-Guang
TI C120RF39, a novel secreted protein with a typical amidation processing
   signal
SO BIOSCIENCE REPORTS
LA English
DT Article
DE amidation/proteolytic processing signal; antibody production; chromosome
   12 open-reading framework 39 (C120RF39); placenta; post-translational
   modification; secreted protein
ID HORMONE-SECRETION; SERUM MARKER; PREDICTION; peptide; GENE;
   GLYCOPROTEIN; CARCINOMA; GASTRIN; CANCER; ROLES
AB In the present study we describe a novel secreted protein, named C120RF39 (chromosome 12 open-reading framework 39), which contains a typical amidation/proteolytic processing signal (Gly-Arg-Arg motif). Interestingly, C120RF39 protein is not hydrolysed, but is a full-length protein without signal peptide. Western blotting indicated that c-Myc-tagged C120RF39 is secreted into culture medium in transfected HeLa cells. Quantitative RT-PCR (reverse transcription-PCR) analysis revealed that c12orf39 is mainly expressed in placenta and brain. Immunohistochemistry on formalin-fixed paraffin-embedded human term placenta using a rabbit antibody against human C120RF39 demonstrated that the protein was localized extracellularly, surrounding the trophoblastic cells. In addition, C120RF39 secretion could be blocked by brefeldin A, suggesting that the secretion of C120RF39 is dependent on the Golgi apparatus. Furthermore, laser-scanning confocal microscopy also confirmed that the C120RF39 protein co-localized with the Golgi apparatus. Taken together, although C120RF39 is not a secreted small peptide, it can also be secreted to play a role in the biological functions of the placenta.
C1 [Wan, Bingbing; Huo, Keke; Han, Ze-Guang] Fudan Univ, Sch Life Sci, State Key Lab Genet Engn, Shanghai 200433, Peoples R China.
   [Wan, Bingbing; Wang, Xin-Rong; Zhou, Yu-Bo; Zhang, Xin; Han, Ze-Guang] Chinese Natl Human Genome Ctr Shanghai, Shanghai Minist, Key Lab Dis & Hlth Genom, Shanghai 201203, Peoples R China.
RP Huo, KK (corresponding author), Fudan Univ, Sch Life Sci, State Key Lab Genet Engn, Shanghai 200433, Peoples R China.
EM kkhuo@fudan.edu.cn; hanzg@chgc.sh.cn
OI Wan, Bingbing/0000-0001-8629-0616; Han, Ze-Guang/0000-0002-1018-1752
FU Chinese High-Tech Research and Development Program (863 program)National
   High Technology Research and Development Program of China [2006AA02Z193,
   2006AA02A305, 2006AA02A310]
FX This work was supported by the Chinese High-Tech Research and
   Development Program (863 program) [grant numbers 2006AA02Z193,
   2006AA02A305, 2006AA02A310].
CR Bendtsen JD, 2004, J MOL BIOL, V340, P783, DOI 10.1016/j.jmb.2004.05.028
   Bonin-Debs AL, 2004, EXPERT OPIN BIOL TH, V4, P551, DOI 10.1517/eobt.4.4.551.29788
   Bowen JM, 2002, PLACENTA, V23, P239, DOI 10.1053/plac.2001.0781
   Bryson K, 2005, NUCLEIC ACIDS RES, V33, pW36, DOI 10.1093/nar/gki410
   Ferrand A, 2006, CANCER LETT, V238, P15, DOI 10.1016/j.canlet.2005.06.025
   Fukuda ME, 2005, CANCER RES, V65, P5190, DOI 10.1158/0008-5472.CAN-04-4134
   GarciaSegura LM, 1996, FRONT NEUROENDOCRIN, V17, P180, DOI 10.1006/frne.1996.0005
   Grimmond SM, 2003, GENOME RES, V13, P1350, DOI 10.1101/gr.983703
   Huxley-Jones J, 2008, DRUG DISCOV TODAY, V13, P685, DOI 10.1016/j.drudis.2008.05.005
   Jalali-Heravi M, 2005, ELECTROPHORESIS, V26, P1874, DOI 10.1002/elps.200410308
   KOLASKAR AS, 1990, FEBS LETT, V276, P172, DOI 10.1016/0014-5793(90)80535-Q
   KYTE J, 1982, J MOL BIOL, V157, P105, DOI 10.1016/0022-2836(82)90515-0
   Ladunga I, 2000, CURR OPIN BIOTECH, V11, P13, DOI 10.1016/S0958-1669(99)00048-8
   Liu F, 2006, MOL CELL PROTEOMICS, V5, P510, DOI 10.1074/mcp.M400114-MCP200
   Liu F, 2003, GENE, V315, P71, DOI 10.1016/S0378-1119(03)00732-7
   Lunghi L, 2007, REPROD BIOL ENDOCRIN, V5, DOI 10.1186/1477-7827-5-6
   McIntosh MW, 2007, CLIN CANCER RES, V13, P4422, DOI 10.1158/1078-0432.CCR-06-2224
   Mueller Gregory P., 2008, V446, P67, DOI 10.1007/978-1-60327-084-7_5
   Prigge ST, 1997, SCIENCE, V278, P1300, DOI 10.1126/science.278.5341.1300
   TRESTON AM, 1992, JNCI-J NATL CANCER I, V13, P169
   VANKESTEREN RE, 1992, P NATL ACAD SCI USA, V89, P4593, DOI 10.1073/pnas.89.10.4593
   Wan BB, 2008, FEBS LETT, V582, P3185, DOI 10.1016/j.febslet.2008.08.009
   Wang XR, 2006, CELL MOL BIOL LETT, V11, P161, DOI 10.2478/s11658-006-0014-6
   Watson SA, 2006, NAT REV CANCER, V6, P936, DOI 10.1038/nrc2014
   Zeck W, 2008, PEDIATR RES, V63, P353, DOI 10.1203/01.pdr.0000304935.19183.07
   Zeng LC, 2004, FEBS LETT, V571, P74, DOI 10.1016/j.febslet.2004.06.059
   Zhang JV, 2005, SCIENCE, V310, P996, DOI 10.1126/science.1117255
   Zhou YB, 2008, MOL CELL BIOCHEM, V317, P61, DOI 10.1007/s11010-008-9809-2
   Zhou YB, 2007, BIOCHEM BIOPH RES CO, V355, P679, DOI 10.1016/j.bbrc.2007.02.020
NR 29
TC 23
Z9 24
U1 0
U2 8
PU PORTLAND PRESS LTD
PI LONDON
PA CHARLES DARWIN HOUSE, 12 ROGER STREET, LONDON WC1N 2JU, ENGLAND
SN 0144-8463
EI 1573-4935
J9 BIOSCIENCE REP
JI Biosci. Rep.
PD FEB
PY 2010
VL 30
IS 1
BP 1
EP 10
DI 10.1042/BSR20080156
PG 10
WC Biochemistry & Molecular Biology; Cell Biology
WE Science Citation Index Expanded (SCI-EXPANDED)
SC Biochemistry & Molecular Biology; Cell Biology
GA 560NN
UT WOS:000274909500001
PM 19193193
DA 2022-04-10
ER

PT J
AU Chen, H
   Yang, HB
   Zhu, XL
   Yadav, T
   Ouyang, J
   Truesdell, SS
   Tan, J
   Wang, YM
   Duan, MH
   Wei, LZ
   Zou, L
   Levine, AS
   Vasudevan, S
   Lan, L
AF Chen, Hao
   Yang, Haibo
   Zhu, Xiaolan
   Yadav, Tribhuwan
   Ouyang, Jian
   Truesdell, Samuel S.
   Tan, Jun
   Wang, Yumin
   Duan, Meihan
   Wei, Leizhen
   Zou, Lee
   Levine, Arthur S.
   Vasudevan, Shobha
   Lan, Li
TI m(5)C modification of mRNA serves a DNA damage code to promote
   homologous recombination
SO NATURE COMMUNICATIONS
LA English
DT Article
ID CHROMATIN CHANGES; R-LOOPS; METHYLTRANSFERASE; REPAIR; DNMT2; PROTEINS;
   IDENTIFICATION; TRANSCRIPTION; RECRUITMENT; REGULATORS
AB Recruitment of DNA repair proteins to DNA damage sites is a critical step for DNA repair. post-translational modification of proteins at DNA damage sites serve as DNA damage codes to recruit specific DNA repair factors. Here, we show that mRNA is locally modified by m(5)C at sites of DNA damage. The RNA methyltransferase TRDMT1 is recruited to DNA damage sites to promote m(5)C induction. Loss of TRDMT1 compromises homologous recombination (HR) and increases cellular sensitivity to DNA double-strand breaks (DSBs). In the absence of TRDMT1, RAD51 and RAD52 fail to localize to sites of reactive oxygen species (ROS)-induced DNA damage. In vitro, RAD52 displays an increased affinity for DNA:RNA hybrids containing m(5)C-modified RNA. Loss of TRDMT1 in cancer cells confers sensitivity to PARP inhibitor in vitro and in vivo. These results reveal an unexpected TRDMT1-m(5)C axis that promotes HR, suggesting that post-transcriptional modifications of RNA can also serve as DNA damage codes to regulate DNA repair. post-translational modification of proteins at DNA damage sites can facilitate the recruitment of DNA repair factors. Here, the authors show that mRNA is locally modified with m(5)C at sites of DNA damage by the RNA methyltransferase TRDMT1 to promote homologous recombination repair.
C1 [Chen, Hao; Wang, Yumin; Duan, Meihan; Wei, Leizhen; Levine, Arthur S.; Lan, Li] Univ Pittsburgh, UPMC Hillman Canc Ctr, Dept Microbiol & Mol Genet, Sch Med, 5117 Ctr Ave, Pittsburgh, PA 15213 USA.
   [Yang, Haibo; Zhu, Xiaolan; Ouyang, Jian; Truesdell, Samuel S.; Tan, Jun; Wang, Yumin; Zou, Lee; Vasudevan, Shobha; Lan, Li] Harvard Med Sch, Massachusetts Gen Hosp, Canc Ctr, Boston, MA 02129 USA.
   [Yang, Haibo; Tan, Jun; Lan, Li] Harvard Med Sch, Massachusetts Gen Hosp, Dept Radiat Oncol, Boston, MA 02129 USA.
   [Yadav, Tribhuwan; Ouyang, Jian; Zou, Lee] Harvard Med Sch, Massachusetts Gen Hosp, Dept Pathol, Boston, MA 02115 USA.
   [Truesdell, Samuel S.; Vasudevan, Shobha] Harvard Med Sch, Massachusetts Gen Hosp, Dept Med, Boston, MA 02129 USA.
RP Lan, L (corresponding author), Univ Pittsburgh, UPMC Hillman Canc Ctr, Dept Microbiol & Mol Genet, Sch Med, 5117 Ctr Ave, Pittsburgh, PA 15213 USA.; Lan, L (corresponding author), Harvard Med Sch, Massachusetts Gen Hosp, Canc Ctr, Boston, MA 02129 USA.; Lan, L (corresponding author), Harvard Med Sch, Massachusetts Gen Hosp, Dept Radiat Oncol, Boston, MA 02129 USA.
EM llan1@mgh.harvard.edu
OI CHEN, HAO/0000-0002-8377-9712; Yang, Haibo/0000-0003-3038-6453
FU National Institutes of HealthUnited States Department of Health & Human
   ServicesNational Institutes of Health (NIH) - USA [GM118833, GM076388,
   CA197779]; Tsinghua Educational Foundation of North America (TEFNA); 
   [GM100202]
FX This work was supported in part by grants from the National Institutes
   of Health to L.L. (GM118833) and L.Z. (GM076388 and CA197779). S.V. and
   S.S.T. were funded by GM100202 to S.V. Funding for the open access
   charge is provided by the National Institutes of Health/GM118833. H.C.
   and M.D. are medical students at Tsinghua University School of Medicine
   and visiting international research scholars at the University of
   Pittsburgh Medical School (2016-2018 H.C. and 2017-2019 M.D.); they were
   funded by the Tsinghua Educational Foundation of North America (TEFNA),
   with their cost of living covered by the China Scholarship Council (CSC)
   through University of Pittsburgh Medical School.
CR Aguilera A, 2017, NAT STRUCT MOL BIOL, V24, P439, DOI 10.1038/nsmb.3395
   Aymard F, 2014, NAT STRUCT MOL BIOL, V21, P366, DOI 10.1038/nsmb.2796
   Ayoub N, 2008, NATURE, V453, P682, DOI 10.1038/nature06875
   Bekker-Jensen S, 2006, J CELL BIOL, V173, P195, DOI 10.1083/jcb.200510130
   Bryant HE, 2005, NATURE, V434, P913, DOI 10.1038/nature03443
   Bukhari SIA, 2016, MOL CELL, V61, P760, DOI 10.1016/j.molcel.2016.02.013
   Ceccaldi R, 2015, NATURE, V518, P258, DOI 10.1038/nature14184
   Cohen S, 2018, NAT COMMUN, V9, DOI 10.1038/s41467-018-02894-w
   Crossley MP, 2019, MOL CELL, V73, P398, DOI 10.1016/j.molcel.2019.01.024
   De Cecco L, 2014, ANN ONCOL, V25, P1628, DOI 10.1093/annonc/mdu173
   Durdevic Z, 2013, CELL REP, V4, P931, DOI 10.1016/j.celrep.2013.07.046
   Elhardt W, 2015, BIOCHIMIE, V112, P66, DOI 10.1016/j.biochi.2015.02.022
   Farmer H, 2005, NATURE, V434, P917, DOI 10.1038/nature03445
   Fernandez-Capetillo O, 2004, J EXP MED, V199, P1671, DOI 10.1084/jem.20032247
   Grosjean Henri, 2004, Methods Mol Biol, V265, P357
   Huen MSY, 2007, CELL, V131, P901, DOI 10.1016/j.cell.2007.09.041
   Jurkowski TP, 2008, RNA, V14, P1663, DOI 10.1261/rna.970408
   Keskin H, 2014, NATURE, V515, P436, DOI 10.1038/nature13682
   Khoddami V, 2013, NAT BIOTECHNOL, V31, P458, DOI 10.1038/nbt.2566
   Khoury-Haddad H, 2015, CELL CYCLE, V14, P950, DOI 10.1080/15384101.2015.1014147
   Lan L, 2014, NUCLEIC ACIDS RES, V42, P2330, DOI 10.1093/nar/gkt1233
   Lan L, 2010, MOL CELL, V40, P976, DOI 10.1016/j.molcel.2010.12.003
   Liu L, 2015, MOL BIOSYST, V11, P262, DOI 10.1039/c4mb00604f
   Lu W.-Y., 2018, MECH ADDITIVE ADV MA, V9
   Mazina OM, 2017, MOL CELL, V67, P19, DOI 10.1016/j.molcel.2017.05.019
   Nguyen HD, 2017, MOL CELL, V65, P832, DOI 10.1016/j.molcel.2017.01.029
   Pankotai T, 2012, NAT STRUCT MOL BIOL, V19, P276, DOI 10.1038/nsmb.2224
   Pinder J, 2015, NUCLEIC ACIDS RES, V43, P9379, DOI 10.1093/nar/gkv993
   Rai K, 2007, GENE DEV, V21, P261, DOI 10.1101/gad.1472907
   Robb R, 2019, CLIN CANCER RES, V25, P4749, DOI 10.1158/1078-0432.CCR-18-3625
   Schapira M, 2016, ACS CHEM BIOL, V11, P575, DOI 10.1021/acschembio.5b00781
   Scott JG, 2017, LANCET ONCOL, V18, P202, DOI 10.1016/S1470-2045(16)30648-9
   Seton-Rogers S, 2017, NAT REV CANCER, V17, P398, DOI [10.1038/nrc.2017.50, 10.1038/nrc.2017.44]
   Shanbhag NM, 2010, CELL, V141, P970, DOI 10.1016/j.cell.2010.04.038
   Stewart GS, 2003, NATURE, V421, P961, DOI 10.1038/nature01446
   Su D, 2012, NATURE, V483, P104, DOI 10.1038/nature10861
   Teng YQ, 2018, NAT COMMUN, V9, DOI 10.1038/s41467-018-06586-3
   Wang XT, 2008, NATURE, V454, P126, DOI 10.1038/nature06992
   Wei LZ, 2015, P NATL ACAD SCI USA, V112, pE3495, DOI 10.1073/pnas.1507105112
   Welty S, 2018, J BIOL CHEM, V293, P1353, DOI 10.1074/jbc.M117.808402
   Xiang Y, 2017, NATURE, V552, P430, DOI 10.1038/nature24007
   Xiang Y, 2017, NATURE, V543, P573, DOI 10.1038/nature21671
   Xie AY, 2007, MOL CELL, V28, P1045, DOI 10.1016/j.molcel.2007.12.005
   Yang X, 2017, CELL RES, V27, P606, DOI 10.1038/cr.2017.55
   Yasuhara T, 2018, CELL, V175, P558, DOI 10.1016/j.cell.2018.08.056
   Zhong SL, 2008, PLANT CELL, V20, P1278, DOI 10.1105/tpc.108.058883
NR 46
TC 24
Z9 25
U1 1
U2 16
PU NATURE RESEARCH
PI BERLIN
PA HEIDELBERGER PLATZ 3, BERLIN, 14197, GERMANY
SN 2041-1723
J9 NAT COMMUN
JI Nat. Commun.
PD JUN 5
PY 2020
VL 11
IS 1
DI 10.1038/s41467-020-16722-7
PG 12
WC Multidisciplinary Sciences
WE Science Citation Index Expanded (SCI-EXPANDED)
SC Science & Technology - Other Topics
GA LY4UN
UT WOS:000540524900001
PM 32503981
OA Green Published, gold
DA 2022-04-10
ER

PT J
AU Chen, TJ
   Wang, HJ
   Liu, JS
   Cheng, HH
   Hsu, SC
   Wu, MC
   Lu, CH
   Wu, YF
   Wu, JW
   Liu, YY
   Kung, HJ
   Wang, WC
AF Chen, Tsan-Jan
   Wang, Hung-Jung
   Liu, Jai-Shin
   Cheng, Hsin-Hung
   Hsu, Sheng-Chieh
   Wu, Meng-Chen
   Lu, Chien-Hung
   Wu, Yu-Fang
   Wu, Jing-Wen
   Liu, Ying-Yuan
   Kung, Hsing-Jien
   Wang, Wen-Ching
TI Mutations in the PKM2 exon-10 region are associated with reduced
   allostery and increased nuclear translocation
SO COMMUNICATIONS BIOLOGY
LA English
DT Article
ID PYRUVATE-KINASE M2; H3K36ME2 HISTONE DEMETHYLASE; GENE-TRANSCRIPTION;
   CELL-PROLIFERATION; CANCER METABOLISM; TUMOR-GROWTH; JMJD5; ISOFORM;
   PHOSPHOFRUCTOKINASE; INHIBITION
AB PKM2 is a key metabolic enzyme central to glucose metabolism and energy expenditure. Multiple stimuli regulate PKM2's activity through allosteric modulation and post-translational modification. Furthermore, PKM2 can partner with KDM8, an oncogenic demethylase and enter the nucleus to serve as a HIF1 alpha co-activator. Yet, the mechanistic basis of the exon-10 region in allosteric regulation and nuclear translocation remains unclear. Here, we determined the crystal structures and kinetic coupling constants of exon-10 tumor-related mutants (H391Y and R399E), showing altered structural plasticity and reduced allostery. Immunoprecipitation analysis revealed increased interaction with KDM8 for H391Y, R399E, and G415R. We also found a higher degree of HIF1 alpha-mediated transactivation activity, particularly in the presence of KDM8. Furthermore, overexpression of PKM2 mutants significantly elevated cell growth and migration. Together, PKM2 exon-10 mutations lead to structure-allostery alterations and increased nuclear functions mediated by KDM8 in breast cancer cells. Targeting the PKM2-KDM8 complex may provide a potential therapeutic intervention.
C1 [Chen, Tsan-Jan; Liu, Jai-Shin; Cheng, Hsin-Hung; Wu, Meng-Chen; Lu, Chien-Hung; Wu, Yu-Fang; Wu, Jing-Wen; Liu, Ying-Yuan; Wang, Wen-Ching] Natl Tsing Hua Univ, Inst Mol & Cellular Biol, Hsinchu 30013, Taiwan.
   [Chen, Tsan-Jan; Liu, Jai-Shin; Cheng, Hsin-Hung; Wu, Meng-Chen; Lu, Chien-Hung; Wu, Yu-Fang; Wu, Jing-Wen; Liu, Ying-Yuan; Wang, Wen-Ching] Natl Tsing Hua Univ, Dept Life Sci, Hsinchu 30013, Taiwan.
   [Wang, Hung-Jung; Hsu, Sheng-Chieh] Natl Hlth Res Inst, Inst Biotechnol & Pharmaceut Res, Miaoli 35053, Taiwan.
   [Hsu, Sheng-Chieh] Natl Tsing Hua Univ, Inst Biotechnol, Hsinchu 30013, Taiwan.
   [Kung, Hsing-Jien] Natl Hlth Res Inst, Inst Mol & Genom Med, Miaoli 35053, Taiwan.
   [Kung, Hsing-Jien] Univ Calif Davis, Dept Biochem & Mol Med, Sch Med, Canc Ctr, Sacramento, CA 95817 USA.
RP Wang, WC (corresponding author), Natl Tsing Hua Univ, Inst Mol & Cellular Biol, Hsinchu 30013, Taiwan.; Wang, WC (corresponding author), Natl Tsing Hua Univ, Dept Life Sci, Hsinchu 30013, Taiwan.; Kung, HJ (corresponding author), Natl Hlth Res Inst, Inst Mol & Genom Med, Miaoli 35053, Taiwan.; Kung, HJ (corresponding author), Univ Calif Davis, Dept Biochem & Mol Med, Sch Med, Canc Ctr, Sacramento, CA 95817 USA.
EM hkung@nhri.org.tw; wcwang@life.nthu.edu.tw
RI Wang, Wen-Ching/ABI-2253-2020
OI Wu, Meng-Jen/0000-0003-2303-0563
FU NHRI, TaiwanNational Health Research Institutes - Taiwan
   [NHRI-EX105-10517BI]; MOST, TaiwanMinistry of Science and Technology,
   Taiwan [MOST-105-2314-B-007-001]
FX This work was supported by NHRI, Taiwan (NHRI-EX105-10517BI) and MOST,
   Taiwan (MOST-105-2314-B-007-001).
CR Anastasiou D, 2012, NAT CHEM BIOL, V8, P839, DOI 10.1038/NCHEMBIO.1060
   Anastasiou D, 2011, SCIENCE, V334, P1278, DOI 10.1126/science.1211485
   Anitha M, 2004, DNA CELL BIOL, V23, P442, DOI 10.1089/1044549041474797
   Antonov AV, 2014, ONCOGENE, V33, P1621, DOI 10.1038/onc.2013.119
   Cairns RA, 2011, NAT REV CANCER, V11, P85, DOI 10.1038/nrc2981
   Cerami E, 2012, CANCER DISCOV, V2, P401, DOI 10.1158/2159-8290.CD-12-0095
   Chaneton B, 2012, NATURE, V491, P458, DOI 10.1038/nature11540
   Cheok CF, 2005, BIOCHEM SOC T, V33, P1456, DOI 10.1042/BST0331456
   Christofk HR, 2008, NATURE, V452, P181, DOI 10.1038/nature06667
   Curtis C, 2012, NATURE, V486, P346, DOI 10.1038/nature10983
   Dayton TL, 2016, EMBO REP, V17, P1721, DOI 10.15252/embr.201643300
   Del Rizzo PA, 2012, MOL CELL BIOL, V32, P4044, DOI 10.1128/MCB.00513-12
   Desai S, 2014, ONCOTARGET, V5, P8202, DOI 10.18632/oncotarget.1159
   Dombrauckas JD, 2005, BIOCHEMISTRY-US, V44, P9417, DOI 10.1021/bi0474923
   Gao JJ, 2013, SCI SIGNAL, V6, DOI 10.1126/scisignal.2004088
   Gao XL, 2012, MOL CELL, V45, P598, DOI 10.1016/j.molcel.2012.01.001
   GARNETT ME, 1974, J BIOL CHEM, V249, P5222
   Giannoni E, 2015, ONCOTARGET, V6, P24061, DOI 10.18632/oncotarget.4448
   Heiden MGV, 2009, SCIENCE, V324, P1029, DOI 10.1126/science.1160809
   Hitosugi T, 2009, SCI SIGNAL, V2, DOI 10.1126/scisignal.2000431
   Hoshino A, 2007, J BIOL CHEM, V282, P17706, DOI 10.1074/jbc.M700094200
   Hsia DA, 2010, P NATL ACAD SCI USA, V107, P9671, DOI 10.1073/pnas.1000401107
   Huang XB, 2013, BIOCHIMIE, V95, P2114, DOI 10.1016/j.biochi.2013.08.002
   Iqbal MA, 2014, FEBS LETT, V588, P2685, DOI 10.1016/j.febslet.2014.04.011
   Iqbal MA, 2014, J BIOL CHEM, V289, P8098, DOI 10.1074/jbc.M113.515742
   Ishimura A, 2012, DEVELOPMENT, V139, P749, DOI 10.1242/dev.074138
   Israelsen WJ, 2013, CELL, V155, P397, DOI 10.1016/j.cell.2013.09.025
   Jiang YH, 2014, NAT COMMUN, V5, DOI 10.1038/ncomms6566
   Jiang YH, 2014, MOL CELL, V53, P75, DOI 10.1016/j.molcel.2013.11.001
   Keller KE, 2012, SCIENCE, V338, P1069, DOI 10.1126/science.1224409
   Kung C, 2012, CHEM BIOL, V19, P1187, DOI 10.1016/j.chembiol.2012.07.021
   Li N, 2016, CELL REP, V15, P843, DOI 10.1016/j.celrep.2016.03.070
   Li ZW, 2014, BBA-REV CANCER, V1846, P285, DOI 10.1016/j.bbcan.2014.07.008
   Liu FB, 2017, NAT CELL BIOL, V19, P1358, DOI 10.1038/ncb3630
   Luo WB, 2011, CELL, V145, P732, DOI 10.1016/j.cell.2011.03.054
   Lv L, 2013, MOL CELL, V52, P340, DOI 10.1016/j.molcel.2013.09.004
   Lv L, 2011, MOL CELL, V42, P719, DOI 10.1016/j.molcel.2011.04.025
   Mazurek S, 2005, SEMIN CANCER BIOL, V15, P300, DOI 10.1016/j.semcancer.2005.04.009
   Mazurek S, 2011, INT J BIOCHEM CELL B, V43, P969, DOI 10.1016/j.biocel.2010.02.005
   McGresham MS, 2014, BIOCHEMISTRY-US, V53, P270, DOI 10.1021/bi401402j
   Morgan HP, 2013, P NATL ACAD SCI USA, V110, P5881, DOI 10.1073/pnas.1217157110
   Oh S, 2012, BIOCHEM BIOPH RES CO, V420, P61, DOI 10.1016/j.bbrc.2012.02.115
   REINHART GD, 1985, BIOCHEMISTRY-US, V24, P7166, DOI 10.1021/bi00346a022
   Wang HJ, 2014, P NATL ACAD SCI USA, V111, P279, DOI 10.1073/pnas.1311249111
   Wang P, 2015, PROTEIN CELL, V6, P275, DOI 10.1007/s13238-015-0132-x
   Yang WW, 2012, CELL, V150, P685, DOI 10.1016/j.cell.2012.07.018
   Yang WW, 2011, NATURE, V480, P118, DOI 10.1038/nature10598
   Zhu H, 2014, STEM CELLS, V32, P2098, DOI 10.1002/stem.1724
NR 48
TC 10
Z9 10
U1 0
U2 3
PU NATURE PUBLISHING GROUP
PI NEW YORK
PA 75 VARICK ST, 9TH FLR, NEW YORK, NY 10013-1917 USA
EI 2399-3642
J9 COMMUN BIOL
JI Commun. Biol.
PD MAR 15
PY 2019
VL 2
AR 105
DI 10.1038/s42003-019-0343-4
PG 11
WC Biology; Multidisciplinary Sciences
WE Science Citation Index Expanded (SCI-EXPANDED)
SC Life Sciences & Biomedicine - Other Topics; Science & Technology - Other
   Topics
GA HO8WG
UT WOS:000461240000003
OA Green Published, gold
DA 2022-04-10
ER

PT J
AU Ong, TP
   Moreno, FS
   Ross, SA
AF Ong, Thomas Prates
   Moreno, Fernando Salvador
   Ross, Sharon Ann
TI Targeting the Epigenome with Bioactive Food Components for Cancer
   Prevention
SO JOURNAL OF NUTRIGENETICS AND NUTRIGENOMICS
LA English
DT Review
DE Bioactive food components; Cancer; DNA methylation; Epigenome; Histone
   modifications; Prevention
ID INHIBITS HISTONE DEACETYLASE; cell cycle ARREST; FOLIC-ACID
   SUPPLEMENTATION; DNA METHYLATION inhibitor; tumor-suppressor gene;
   DIALLYL DISULFIDE; IN-VIVO; EPIGENETIC MODIFICATION; DEVELOPMENTAL
   ORIGINS; P21(WAF1) EXPRESSION
AB Epigenetic processes participate in cancer development and likely influence cancer prevention. Global DNA hypomethylation, gene promoter hypermethylation and aberrant histone post-translational modification are hallmarks of neoplastic cells which have been associated with genomic instability and altered gene expression. Because epigenetic deregulation occurs early in carcinogenesis and is potentially reversible, intervention strategies targeting the epigenome have been proposed for cancer prevention. Bioactive food components (BFCs) with anticancer potential, including folate, polyphenols, selenium, retinoids, fatty acids, isothiocyanates and allyl compounds, influence DNA methylation and histone modification processes. Such activities have been shown to affect the expression of genes involved in cell proliferation, death and differentiation that are frequently altered in cancer. Although the epigenome represents a promising target for cancer prevention with BFCs, few studies have addressed the influence of dietary components on these mechanism in vivo, particularly on the phenotype of humans, and thus the exact mechanism whereby diet mediates an effect on cancer prevention remains unclear. Primary factors that should be elucidated include the effective doses and dose timing of BFCs to attain epigenetic effects. Because diet-epigenome interactions are likely to occur in utero, the impact of early-life nutrition on cancer risk programming should be further investigated. Copyright (C) 2012 S. Karger AG, Basel
C1 [Ong, Thomas Prates; Moreno, Fernando Salvador] Univ Sao Paulo, Dept Alimentos & Nutr Expt, Fac Ciencias Farmaceut, Lab Diet Nutr & Canc, BR-05508900 Sao Paulo, Brazil.
   [Ross, Sharon Ann] NCI, Nutr Sci Res Grp, Canc Prevent Div, NIH,Dept Hlth & Human Serv, Bethesda, MD 20892 USA.
RP Ong, TP (corresponding author), Univ Sao Paulo, Dept Alimentos & Nutr Expt, Fac Ciencias Farmaceut, Lab Diet Nutr & Canc, Bloco 14,Av Prof Lineu Prestes 580, BR-05508900 Sao Paulo, Brazil.
EM tong@usp.br
RI Ong, Thomas/N-1272-2019; Ong, Thomas P/C-4494-2012; Moreno,
   Fernando/I-1943-2013
OI Moreno, Fernando/0000-0002-1908-5046; Ong, Thomas/0000-0002-7709-1866
FU FAPESP (Fundacao de Amparo a Pesquisa do Estado de Sao Paulo)Fundacao de
   Amparo a Pesquisa do Estado de Sao Paulo (FAPESP); CAPES (Coordenacao de
   Aperfeicoamento de Pessoal de Nivel Superior)Coordenacao de
   Aperfeicoamento de Pessoal de Nivel Superior (CAPES); CNPq (Conselho
   Nacional de Desenvolvimento Cientifico e Tecnologico)Conselho Nacional
   de Desenvolvimento Cientifico e Tecnologico (CNPQ)
FX Research in the Diet, Nutrition and Cancer Laboratory is supported by
   FAPESP (Fundacao de Amparo a Pesquisa do Estado de Sao Paulo), CAPES
   (Coordenacao de Aperfeicoamento de Pessoal de Nivel Superior) and CNPq
   (Conselho Nacional de Desenvolvimento Cientifico e Tecnologico).
CR Aagaard-Tillery KM, 2008, J MOL ENDOCRINOL, V41, P91, DOI 10.1677/JME-08-0025
   Chagas CEA, 2011, INT J CANCER, V129, P2073, DOI 10.1002/ijc.25886
   Attig L, 2010, P NUTR SOC, V69, P221, DOI 10.1017/S002966511000008X
   Balasubramanian S, 2008, NUTR REV, V66, pS65, DOI 10.1111/j.1753-4887.2008.00071.x
   Balasubramanian S, 2010, CARCINOGENESIS, V31, P496, DOI 10.1093/carcin/bgp314
   Baylin SB, 2006, NAT REV CANCER, V6, P107, DOI 10.1038/nrc1799
   Berletch JB, 2008, J CELL BIOCHEM, V103, P509, DOI 10.1002/jcb.21417
   Bracken AP, 2009, NAT REV CANCER, V9, P773, DOI 10.1038/nrc2736
   Callinan PA, 2006, HUM MOL GENET, V15, pR95, DOI 10.1093/hmg/ddl095
   Chen J, 2010, ADV GENET, V71, P237, DOI [10.1016/S0065-2660(10)71009-9, 10.1016/B978-0-12-380864-6.00008-0]
   Chen YX, 2004, WORLD J GASTROENTERO, V10, P2643, DOI 10.3748/wjg.v10.i18.2643
   Cheong HS, 2010, BMB REP, V43, P830, DOI 10.5483/BMBRep.2010.43.12.830
   Chi P, 2010, NAT REV CANCER, V10, P457, DOI 10.1038/nrc2876
   Chiam K, 2009, BBA-REV CANCER, V1795, P104, DOI 10.1016/j.bbcan.2008.12.001
   Chuang JC, 2005, MOL CANCER THER, V4, P1515, DOI 10.1158/1535-7163.MCT-05-0172
   Chung TL, 2010, STEM CELLS, V28, P1848, DOI 10.1002/stem.493
   Clarke JD, 2011, MOL NUTR FOOD RES, V55, P999, DOI 10.1002/mnfr.201000547
   Das PM, 2004, J CLIN ONCOL, V22, P4632, DOI 10.1200/JCO.2004.07.151
   Dashwood RH, 2006, CARCINOGENESIS, V27, P344, DOI 10.1093/carcin/bgi253
   Davie JR, 2003, J NUTR, V133, p2485S, DOI 10.1093/jn/133.7.2485S
   Davis CD, 2000, J NUTR, V130, P2903, DOI 10.1093/jn/130.12.2903
   Davis CD, 2004, EXP BIOL MED, V229, P988, DOI 10.1177/153537020422901002
   Davis CD, 2002, J NUTR, V132, P292, DOI 10.1093/jn/132.2.292
   Davis CD, 2007, CURR CANCER DRUG TAR, V7, P410
   Davis CD, 2007, NUTR REV, V65, P88, DOI [10.1111/j.1753-4887.2007.tb00285.x, 10.1301/nr.2007.feb.88-94]
   Day JK, 2002, J NUTR, V132, p2419S, DOI 10.1093/jn/132.8.2419S
   De Conti, 2011, J NUTR BIOCH
   Di Croce L, 2002, SCIENCE, V295, P1079, DOI 10.1126/science.1065173
   Dimri M, 2010, CARCINOGENESIS, V31, P489, DOI 10.1093/carcin/bgp305
   Dolinoy DC, 2006, ENVIRON HEALTH PERSP, V114, P567, DOI 10.1289/ehp.8700
   Druesne N, 2004, CARCINOGENESIS, V25, P1227, DOI 10.1093/carcin/bgh123
   Druesne-Pecollo N, 2006, J AGR FOOD CHEM, V54, P7503, DOI 10.1021/jf061369w
   Duthie SJ, 2011, J INHERIT METAB DIS, V34, P101, DOI 10.1007/s10545-010-9128-0
   Ehrlich M, 2009, EPIGENOMICS-UK, V1, P239, DOI [10.2217/epi.09.33, 10.2217/EPI.09.33]
   Esteller M, 2002, CANCER RES, V62, P5902
   Fang MZ, 2007, J NUTR, V137, p223S, DOI 10.1093/jn/137.1.223S
   Fang MZ, 2005, CLIN CANCER RES, V11, P7033, DOI 10.1158/1078-0432.CCR-05-0406
   Fazi F, 2005, ONCOGENE, V24, P1820, DOI 10.1038/sj.onc.1208286
   Fazzari MJ, 2010, METHODS MOL BIOL, V620, P243, DOI 10.1007/978-1-60761-580-4_7
   Ferguson LR, 2011, CURR CANCER DRUG TAR, V11, P199
   Foley DL, 2009, AM J EPIDEMIOL, V169, P389, DOI 10.1093/aje/kwn380
   Fraga MF, 2005, CELL CYCLE, V4, P1377, DOI 10.4161/cc.4.10.2113
   Fraga MF, 2005, NAT GENET, V37, P391, DOI 10.1038/ng1531
   Fullgrabe J, 2011, ONCOGENE, V30, P3391, DOI 10.1038/onc.2011.121
   Ghoshal K, 2006, J NUTR, V136, P1522, DOI 10.1093/jn/136.6.1522
   Gronbaek K, 2008, BASIC CLIN PHARMACOL, V103, P389, DOI 10.1111/j.1742-7843.2008.00325.x
   Gudas LJ, 2011, J CELL PHYSIOL, V226, P322, DOI 10.1002/jcp.22417
   Hilakivi-Clarke L, 2007, CURR CANCER DRUG TAR, V7, P465
   Hilakivi-Clarke L, 2006, TRENDS ENDOCRIN MET, V17, P340, DOI 10.1016/j.tem.2006.09.002
   Hu R, 2006, CARCINOGENESIS, V27, P2038, DOI 10.1093/carcin/bgl049
   Hua WF, 2010, EUR J PHARMACOL, V637, P16, DOI 10.1016/j.ejphar.2010.03.051
   Huang J, 2010, CURR DRUG target
   James SJ, 2003, J NUTR, V133, p3740S, DOI 10.1093/jn/133.11.3740S
   Johanning GL, 2003, NUTR REV, V61, P284, DOI 10.1301/nr.2003.aug.284-289
   Jones PA, 2007, CELL, V128, P683, DOI 10.1016/j.cell.2007.01.029
   Kang SK, 2006, STEM CELLS DEV, V15, P165, DOI 10.1089/scd.2006.15.165
   Kashyap V, 2010, J BIOL CHEM, V285, P14534, DOI 10.1074/jbc.M110.115345
   Kikuno N, 2008, INT J CANCER, V123, P552, DOI 10.1002/ijc.23590
   Kim YI, 2007, MOL NUTR FOOD RES, V51, P267, DOI 10.1002/mnfr.200600191
   Kinney SRM, 2009, CANCER PREV RES, V2, P1065, DOI 10.1158/1940-6207.CAPR-09-0010
   Kuroiwa-Trzmielina J, 2009, INT J CANCER, V124, P2520, DOI 10.1002/ijc.24212
   Lea MA, 2001, ANTICANCER RES, V21, P2841
   Lea MA, 1999, INT J ONCOL, V15, P347
   Lee JI, 2009, CANCER PREV RES, V2, P683, DOI 10.1158/1940-6207.CAPR-09-0047
   Lee K, 2008, J INVEST DERMATOL, V128, P9, DOI 10.1038/sj.jid.5700949
   Lee WJ, 2006, CARCINOGENESIS, V27, P269, DOI 10.1093/carcin/bgi206
   Lee WJ, 2005, MOL PHARMACOL, V68, P1018, DOI 10.1124/mol.104.008367
   Li YY, 2009, INT J CANCER, V125, P286, DOI 10.1002/ijc.24398
   Lillycrop KA, 2005, J NUTR, V135, P1382, DOI 10.1093/jn/135.6.1382
   Lillycrop KA, 2007, BRIT J NUTR, V97, P1064, DOI 10.1017/S000711450769196X
   Lin YW, 2011, CANCER INVEST, V29, P187, DOI 10.3109/07357907.2010.512605
   Link A, 2010, BIOCHEM PHARMACOL, V80, P1771, DOI 10.1016/j.bcp.2010.06.036
   Liu ZF, 2009, BIOORG MED CHEM LETT, V19, P706, DOI 10.1016/j.bmcl.2008.12.041
   Lu R, 2008, epigenetic-US, V3, P330, DOI 10.4161/epi.3.6.7125
   Ma XD, 2006, INT J ONCOL, V28, P1287
   Majid S, 2008, CANCER RES, V68, P2736, DOI 10.1158/0008-5472.CAN-07-2290
   Majid S, 2009, CARCINOGENESIS, V30, P662, DOI 10.1093/carcin/bgp042
   Mann BS, 2007, ONCOLOGIST, V12, P1247, DOI 10.1634/theoncologist.12-10-1247
   Milner JA, 2004, J NUTR, V134, p2492S, DOI 10.1093/jn/134.9.2492S
   Mittal A, 2003, NEOPLASIA, V5, P555, DOI 10.1016/S1476-5586(03)80039-8
   Moreno FS, 2002, NUTR CANCER, V44, P80, DOI 10.1207/S15327914NC441_11
   Myzak MC, 2006, CARCINOGENESIS, V27, P811, DOI 10.1093/carcin/bgi265
   Myzak MC, 2006, FASEB J, V20, P506, DOI 10.1096/fj.05-4785fje
   Myzak MC, 2006, CURR DRUG target, V7, P443, DOI 10.2174/138945006776359467
   Myzak MC, 2004, CANCER RES, V64, P5767, DOI 10.1158/0008-5472.CAN-04-1326
   Myzak MC, 2007, EXP BIOL MED, V232, P227
   Nafee TM, 2008, BJOG-INT J OBSTET GY, V115, P158, DOI 10.1111/j.1471-0528.2007.01528.x
   Nian H, 2008, CARCINOGENESIS, V29, P1816, DOI 10.1093/carcin/bgn165
   Nian H, 2009, ENVIRON MOL MUTAGEN, V50, P213, DOI 10.1002/em.20454
   Papoutsis AJ, 2010, J NUTR, V140, P1607, DOI 10.3945/jn.110.123422
   Pascale RM, 2002, ALCOHOL, V27, P193, DOI 10.1016/S0741-8329(02)00227-6
   Perera F, 2011, ENVIRON HEALTH-GLOB, V10, DOI 10.1186/1476-069X-10-S1-S5
   Pilsner JR, 2011, ENVIRON HEALTH PERSP, V119, P113, DOI 10.1289/ehp.1001937
   Piunti A, 2011, FUTURE ONCOL, V7, P57, DOI [10.2217/fon.10.157, 10.2217/FON.10.157]
   Pledgie-Tracy A, 2007, MOL CANCER THER, V6, P1013, DOI 10.1158/1535-7163.MCT-06-0494
   Pogribny IP, 2009, CELL MOL LIFE SCI, V66, P2249, DOI 10.1007/s00018-009-0015-5
   Pogribny IP, 2006, MUTAT RES-FUND MOL M, V593, P80, DOI 10.1016/j.mrfmmm.2005.06.028
   Pogribny IP, 2002, CANCER LETT, V187, P69, DOI 10.1016/S0304-3835(02)00408-1
   POIRIER LA, 1994, DRUG METAB REV, V26, P185, DOI 10.3109/03602539409029790
   Portela A, 2010, NAT BIOTECHNOL, V28, P1057, DOI 10.1038/nbt.1685
   Prezioso C, 2011, FEBS LETT, V585, P2067, DOI 10.1016/j.febslet.2011.04.062
   Qin WY, 2009, NUTR CANCER, V61, P238, DOI 10.1080/01635580802404196
   Rajendran P, 2011, CRIT REV BIOCHEM MOL, V46, P181, DOI 10.3109/10409238.2011.557713
   Ramachandran K, 2007, ANTICANCER RES, V27, P921
   ROGERS AE, 1995, AM J CLIN NUTR, V61, p659S, DOI 10.1093/ajcn/61.3.659S
   Ross SA, 2003, ANN NY ACAD SCI, V983, P197, DOI 10.1111/j.1749-6632.2003.tb05974.x
   Rowling MJ, 2002, J NUTR, V132, P365, DOI 10.1093/jn/132.3.365
   Sauer J, 2009, CURR OPIN CLIN NUTR, V12, P30, DOI 10.1097/MCO.0b013e32831cec62
   Shen WJ, 2008, WORLD J GASTROENTERO, V14, P595, DOI 10.3748/wjg.14.595
   Soto AM, 2008, BASIC CLIN PHARMACOL, V102, P125, DOI 10.1111/j.1742-7843.2007.00165.x
   Stefanska B, 2010, EUR J PHARMACOL, V638, P47, DOI 10.1016/j.ejphar.2010.04.032
   Stidley CA, 2010, CANCER RES, V70, P568, DOI 10.1158/0008-5472.CAN-09-3410
   Stover PJ, 2009, J NUTR, V139, P2402, DOI 10.3945/jn.109.113670
   Surh YJ, 2003, NAT REV CANCER, V3, P768, DOI 10.1038/nrc1189
   Tao LH, 2000, TOXICOL SCI, V54, P399, DOI 10.1093/toxsci/54.2.399
   Thornburg KL, 2010, ADV GENET, V71, P57, DOI [10.1016/S0065-2660(10)71003-8, 10.1016/B978-0-12-380864-6.00003-1]
   Thun MJ, 2010, CARCINOGENESIS, V31, P100, DOI 10.1093/carcin/bgp263
   TRICHOPOULOS D, 1990, LANCET, V335, P939, DOI 10.1016/0140-6736(90)91000-Z
   Tsao AS, 2009, CANCER PREV RES, V2, P931, DOI 10.1158/1940-6207.CAPR-09-0121
   Uthus EO, 2006, BIOL TRACE ELEM RES, V109, P201, DOI 10.1385/BTER:109:3:201
   Varier RA, 2011, BBA-REV CANCER, V1815, P75, DOI 10.1016/j.bbcan.2010.10.002
   Verma M, 2002, LANCET ONCOL, V3, P755, DOI 10.1016/S1470-2045(02)00932-4
   Vessey M P, 1989, IARC Sci Publ, P335
   Volate SR, 2009, MOL CARCINOGEN, V48, P920, DOI 10.1002/mc.20542
   Waby JS, 2010, MOL CANCER, V9, DOI 10.1186/1476-4598-9-275
   Wallace K, 2010, CANCER PREV RES, V3, P1552, DOI 10.1158/1940-6207.CAPR-10-0047
   Wang LG, 2008, INT J ONCOL, V33, P375, DOI 10.3892/ijo_00000018
   Waterland RA, 2003, MOL CELL BIOL, V23, P5293, DOI 10.1128/MCB.23.15.5293-5300.2003
   Wells PG, 2009, TOXICOL SCI, V108, P4, DOI 10.1093/toxsci/kfn263
   Widschwendter M, 2007, NAT GENET, V39, P157, DOI 10.1038/ng1941
   World Cancer Resarch Fund/American Institue for Cancer Research, 2007, FOOD NUTR PHYS ACT P
   Xiang N, 2008, CARCINOGENESIS, V29, P2175, DOI 10.1093/carcin/bgn179
   Yenbutr P, 1998, MECH AGEING DEV, V106, P93, DOI 10.1016/S0047-6374(98)00093-1
   Yoo CB, 2006, NAT REV DRUG DISCOV, V5, P37, DOI 10.1038/nrd1930
   Yuasa Y, 2009, INT J CANCER, V124, P2677, DOI 10.1002/ijc.24231
   Zhao J, 2006, ACTA PHARMACOL SIN, V27, P1459, DOI 10.1111/j.1745-7254.2006.00433.x
NR 136
TC 58
Z9 58
U1 2
U2 18
PU KARGER
PI BASEL
PA ALLSCHWILERSTRASSE 10, CH-4009 BASEL, SWITZERLAND
SN 1661-6499
EI 1661-6758
J9 J NUTRIGENET NUTRIGE
JI J. Nutrigenet. Nutrigenomics
PY 2011
VL 4
IS 5
BP 275
EP 292
DI 10.1159/000334585
PG 18
WC Genetics & Heredity; Nutrition & Dietetics
WE Science Citation Index Expanded (SCI-EXPANDED)
SC Genetics & Heredity; Nutrition & Dietetics
GA 899FX
UT WOS:000300802900004
PM 22353664
OA Bronze, Green Published
DA 2022-04-10
ER

PT J
AU Lawal, TA
   Wires, ES
   Terry, NL
   Dowling, JJ
   Todd, JJ
AF Lawal, Tokunbor A.
   Wires, Emily S.
   Terry, Nancy L.
   Dowling, James J.
   Todd, Joshua J.
TI Preclinical model systems of ryanodine receptor 1-related myopathies and
   malignant hyperthermia: a comprehensive scoping review of works
   published 1990-2019
SO ORPHANET JOURNAL OF RARE DISEASES
LA English
DT Review
DE Ryanodine receptor; RYR1; Congenital myopathy; Central core disease;
   Preclinical; Mouse; Zebrafish; HEK-293; Porcine; Malignant hyperthermia
ID CENTRAL CORE DISEASE; CA2+ RELEASE CHANNEL; SKELETAL-MUSCLE CELLS;
   COUPLED CALCIUM-ENTRY; SUCCESSFUL ANTIOXIDANT TREATMENT; PROBABLE CAUSAL
   MUTATION; RECESSIVE RYR1 MUTATIONS; MUTANT MICE LACKING; 1 C7360G
   MUTATION; II-III-LOOP
AB Background Pathogenic variations in the gene encoding the skeletal muscle ryanodine receptor (RyR1) are associated with malignant hyperthermia (MH) susceptibility, a life-threatening hypermetabolic condition and RYR1-related myopathies (RYR1-RM), a spectrum of rare neuromuscular disorders. In RYR1-RM, intracellular calcium dysregulation, post-translational modification, and decreased protein expression lead to a heterogenous clinical presentation including proximal muscle weakness, contractures, scoliosis, respiratory insufficiency, and ophthalmoplegia. Preclinical model systems of RYR1-RM and MH have been developed to better understand underlying pathomechanism and test potential therapeutics. Methods We conducted a comprehensive scoping review of scientific literature pertaining to RYR1-RM and MH preclinical model systems in accordance with the PRISMA Scoping Reviews Checklist and the framework proposed by Arksey and O'Malley. Two major electronic databases (PubMed and EMBASE) were searched without language restriction for articles and abstracts published between January 1, 1990 and July 3, 2019. Results Our search yielded 5049 publications from which 262 were included in this review. A majority of variants tested in RYR1 preclinical models were localized to established MH/central core disease (MH/CCD) hot spots. A total of 250 unique RYR1 variations were reported in human/rodent/porcine models with 95% being missense substitutions. The most frequently reported RYR1 variant was R614C/R615C (human/porcine total n = 39), followed by Y523S/Y524S (rabbit/mouse total n = 30), I4898T/I4897T/I4895T (human/rabbit/mouse total n = 20), and R163C/R165C (human/mouse total n = 18). The dyspedic mouse was utilized by 47% of publications in the rodent category and its RyR1-null (1B5) myotubes were transfected in 23% of publications in the cellular model category. In studies of transfected HEK-293 cells, 57% of RYR1 variations affected the RyR1 channel and activation core domain. A total of 15 RYR1 mutant mouse strains were identified of which ten were heterozygous, three were compound heterozygous, and a further two were knockout. Porcine, avian, zebrafish, C. elegans, canine, equine, and drosophila model systems were also reported. Conclusions Over the past 30 years, there were 262 publications on MH and RYR1-RM preclinical model systems featuring more than 200 unique RYR1 variations tested in a broad range of species. Findings from these studies have set the foundation for therapeutic development for MH and RYR1-RM.
C1 [Lawal, Tokunbor A.; Todd, Joshua J.] NINR, NIH, Bethesda, MD 20892 USA.
   [Wires, Emily S.] NIDA, NIH, Baltimore, MD USA.
   [Terry, Nancy L.] Natl Inst Hlth Lib, NIH, Bethesda, MD USA.
   [Dowling, James J.] Hosp Sick Children, Program Genet & Genome Biol, Toronto, ON, Canada.
RP Todd, JJ (corresponding author), NINR, NIH, Bethesda, MD 20892 USA.
EM joshua.todd@nih.gov
OI Todd, Joshua/0000-0001-7608-5184
FU Intramural Research Program of the National Institute of Nursing
   Research (NINR)
FX This work was funded by the Intramural Research Program of the National
   Institute of Nursing Research (NINR).
CR Ahern CA, 2003, BIOPHYS J, V84, P942, DOI 10.1016/S0006-3495(03)74911-X
   AIREY JA, 1993, DEV DYNAM, V197, P169, DOI 10.1002/aja.1001970303
   AIREY JA, 1993, DEV DYNAM, V197, P189, DOI 10.1002/aja.1001970304
   Aleman M, 2004, MUSCLE NERVE, V30, P356, DOI 10.1002/mus.20084
   Aleman M, 2009, J VET INTERN MED, V23, P329, DOI 10.1111/j.1939-1676.2009.0274.x
   Altafaj X, 2005, J BIOL CHEM, V280, P4013, DOI 10.1074/jbc.C400433200
   Amburgey K, 2011, ANN NEUROL, V70, P662, DOI 10.1002/ana.22510
   Anderson AA, 2008, ANESTHESIOLOGY, V108, P208, DOI 10.1097/01.anes.0000299431.81267.3e
   Andersson DC, 2012, J PHYSIOL-LONDON, V590, P6381, DOI 10.1113/jphysiol.2012.237925
   Andersson DC, 2011, CELL METAB, V14, P196, DOI 10.1016/j.cmet.2011.05.014
   Andronache Z, 2009, P NATL ACAD SCI USA, V106, P4531, DOI 10.1073/pnas.0812661106
   [Anonymous], 2000, STRATEGIES INFLUENCE
   Anzalone AV, 2019, NATURE, V576, P149, DOI 10.1038/s41586-019-1711-4
   Aracena-Parks P, 2006, J BIOL CHEM, V281, P40354, DOI 10.1074/jbc.M600876200
   Arksey H, 2005, INT J SOC RES METHOD, V8, P19, DOI [10.1080/1364557032000119616, DOI 10.1080/1364557032000119616]
   Attali R, 2013, PLOS ONE, V8, DOI 10.1371/journal.pone.0069296
   Avila G, 2000, J GEN PHYSIOL, V115, P467, DOI 10.1085/jgp.115.4.467
   Avila G, 2003, J GEN PHYSIOL, V121, P277, DOI 10.1085/jgp.200308791
   Avila G, 2001, P NATL ACAD SCI USA, V98, P4215, DOI 10.1073/pnas.071048198
   Avila G, 2001, J GEN PHYSIOL, V118, P277, DOI 10.1085/jgp.118.3.277
   Avila G, 2003, J BIOL CHEM, V278, P22600, DOI 10.1074/jbc.M205866200
   Avila G, 2001, J BIOL CHEM, V276, P17732, DOI 10.1074/jbc.M009685200
   Baines KN, 2017, G3-GENES GENOM GENET, V7, P1451, DOI 10.1534/g3.117.040535
   Baines KN, 2014, BMC ANESTHESIOL S1, V14, pA21, DOI [10.1186/1471-2253-14-S1-A21, DOI 10.1186/1471-2253-14-S1-A21]
   Balog EM, 2001, BIOPHYS J, V81, P2050, DOI 10.1016/S0006-3495(01)75854-7
   Bannister RA, 2013, BIOMED RES INT, V2013, DOI 10.1155/2013/390493
   Bannister RA, 2009, J MUSCLE RES CELL M, V30, P217, DOI 10.1007/s10974-009-9190-0
   Bannister RA, 2016, BIOPHYS J, V110, P912, DOI 10.1016/j.bpj.2015.12.031
   Bannister RA, 2010, J GEN PHYSIOL, V135, P629, DOI 10.1085/jgp.200910329
   Bannister RA, 2009, CHANNELS, V3, P268, DOI 10.4161/chan.3.4.9342
   Barone V, 1998, FEBS LETT, V422, P160, DOI 10.1016/S0014-5793(98)00003-9
   Barrientos GC, 2012, J BIOL CHEM, V287, P2863, DOI 10.1074/jbc.M111.307926
   Basic Ivan, 1997, Periodicum Biologorum, V99, P313
   Beutner G, 2005, BBA-BIOMEMBRANES, V1717, P1, DOI 10.1016/j.bbamem.2005.09.016
   Bhattacharya D, 2015, PLOS ONE, V10, DOI 10.1371/journal.pone.0131399
   Bina S, 2010, ANESTHESIOLOGY, V113, P917, DOI 10.1097/ALN.0b013e3181ee2cd0
   Boncompagni S, 2010, AGING CELL, V9, P958, DOI 10.1111/j.1474-9726.2010.00623.x
   Boncompagni S, 2009, P NATL ACAD SCI USA, V106, P21996, DOI 10.1073/pnas.0911496106
   Booms P, 2009, BRIT J ANAESTH, V103, P315
   Bovo E, 2013, PFLUG ARCH EUR J PHY, V465, P1775, DOI 10.1007/s00424-013-1312-2
   Brennan S, 2019, HUM MOL GENET, V28, P3024, DOI 10.1093/hmg/ddz105
   Brini M, 2005, J BIOL CHEM, V280, P15380, DOI 10.1074/jbc.M410421200
   Brinkmeier H, 1999, BRIT J ANAESTH, V83, P855, DOI 10.1093/bja/83.6.855
   Broman M, 2009, BRIT J ANAESTH, V102, P642, DOI 10.1093/bja/aep061
   Cacheux Marine, 2015, J Neuromuscul Dis, V2, P421
   Censier K, 1998, J CLIN INVEST, V101, P1233, DOI 10.1172/JCI993
   Chelu MG, 2005, FASEB J, V19, P329, DOI 10.1096/fj.05-4497fje
   Chelu MG, 2006, FASEB J, V20, P329, DOI 10.1096/fj.05-4497fje
   Chen WQ, 2017, BIOCHEM J, V474, P2749, DOI 10.1042/BCJ20170282
   Cheng WJ, 2005, P NATL ACAD SCI USA, V102, P19225, DOI 10.1073/pnas.0504334102
   Cherednichenko G, 2008, MOL PHARMACOL, V73, P1203, DOI 10.1124/mol.107.043299
   Chirasani VR, 2019, AM J PHYSIOL-CELL PH, V317, pC358, DOI 10.1152/ajpcell.00052.2019
   Choi RH, 2017, P NATL ACAD SCI USA, V114, P4811, DOI 10.1073/pnas.1619835114
   Conklin MW, 2000, BIOPHYS J, V78, P1777, DOI 10.1016/S0006-3495(00)76728-2
   Corona BT, 2008, J APPL PHYSIOL, V105, P1542, DOI 10.1152/japplphysiol.90926.2008
   Corona BT, 2010, MUSCLE NERVE, V42, P270, DOI 10.1002/mus.21715
   De Crescenzo V, 2012, P NATL ACAD SCI USA, V109, P610, DOI 10.1073/pnas.1115111108
   Denborough M, 1998, LANCET, V352, P1131, DOI 10.1016/S0140-6736(98)03078-5
   des Georges A, 2016, CELL, V167, P145, DOI 10.1016/j.cell.2016.08.075
   Dietze B, 2000, J PHYSIOL-LONDON, V526, P507, DOI 10.1111/j.1469-7793.2000.t01-1-00507.x
   Dirksen RT, 2004, BIOPHYS J, V87, P3193, DOI [10.1529/biophysj.104.048447, 10.1529/biophysj.104.049447]
   Douris V, 2017, INSECT BIOCHEM MOLEC, V87, P127, DOI 10.1016/j.ibmb.2017.06.013
   Dowling JJ, 2011, NEUROMUSCULAR DISORD, V21, P720, DOI 10.1016/j.nmd.2011.06.1019
   Dowling JJ, 2010, NEUROMUSCULAR DISORD, V20, P612, DOI 10.1016/j.nmd.2010.07.053
   Dowling JJ, 2012, BRAIN, V135, P1115, DOI 10.1093/brain/aws036
   DOWLING JJ, 2009, ANN NEUROL S13, V66, pS133
   Du GG, 2004, BIOCHEM J, V382, P557, DOI 10.1042/BJ20040580
   Du GG, 2004, J BIOL CHEM, V279, P37566, DOI 10.1074/jbc.M406637200
   Du GG, 2001, BIOCHEM J, V360, P97, DOI 10.1042/0264-6021:3600097
   Ducreux S, 2004, J BIOL CHEM, V279, P43838, DOI 10.1074/jbc.M403612200
   Ducreux S, 2006, BIOCHEM J, V395, P259, DOI 10.1042/BJ20051282
   Durham WJ, 2008, CELL, V133, P53, DOI 10.1016/j.cell.2008.02.042
   Elbaz M, 2019, HUM MOL GENET, V28, P2987, DOI 10.1093/hmg/ddz092
   Elbaz M, 2019, HUM MOL GENET, V28, P1872, DOI 10.1093/hmg/ddz025
   Eltit JM, 2013, FASEB J, V27, P991, DOI 10.1096/fj.12-218354
   Esteve E, 2010, FUND CLIN PHARMACOL, V24, P42
   Esteve E, 2010, J GEN PHYSIOL, V135, P619, DOI 10.1085/jgp.200910328
   Estrada M, 2001, J BIOL CHEM, V276, P22868, DOI 10.1074/jbc.M100118200
   FAGERLUND T, 1994, CLIN GENET, V46, P401
   Felder E, 2002, BIOPHYS J, V82, P3144, DOI 10.1016/S0006-3495(02)75656-7
   Feng W, 2002, J BIOL CHEM, V277, P44722, DOI 10.1074/jbc.M207675200
   Feng W, 2011, MOL PHARMACOL, V79, P420, DOI 10.1124/mol.110.067959
   Fessenden JD, 2000, BIOPHYS J, V79, P2509, DOI 10.1016/S0006-3495(00)76492-7
   Fessenden JD, 2004, J BIOL CHEM, V279, P53028, DOI 10.1074/jbc.M411136200
   Fessenden JD, 2003, J BIOL CHEM, V278, P28727, DOI 10.1074/jbc.M303821200
   Fessenden JD, 2001, P NATL ACAD SCI USA, V98, P2865, DOI 10.1073/pnas.041608898
   Filipova D, 2017, ACTA PHYSIOL, V219, P38
   Filipova D, 2015, ACTA PHYSIOL, V213, P152
   FILIPOVA D, 2016, ACTA PHYSIOL S707, V216, P207
   Filipova D, 2018, PLOS ONE, V13, DOI 10.1371/journal.pone.0194428
   Filipova D, 2016, SCI REP-UK, V6, DOI 10.1038/srep20050
   Flucher BE, 1999, J CELL BIOL, V146, P621, DOI 10.1083/jcb.146.3.621
   Fruen BR, 1997, J BIOL CHEM, V272, P26965, DOI 10.1074/jbc.272.43.26965
   FUJII J, 1991, SCIENCE, V253, P448, DOI 10.1126/science.1862346
   Fusto A, 2019, DIS MODEL MECH, V12, DOI 10.1242/dmm.041368
   Gaburjakova M, 2001, J BIOL CHEM, V276, P16931, DOI 10.1074/jbc.M100856200
   Gallant EM, 2004, AM J PHYSIOL-CELL PH, V286, pC821, DOI 10.1152/ajpcell.00311.2003
   Gallant EM, 2001, BIOPHYS J, V80, P1769, DOI 10.1016/S0006-3495(01)76147-4
   Gao L, 2000, BIOPHYS J, V79, P828, DOI 10.1016/S0006-3495(00)76339-9
   Gao SY, 2013, ANESTHESIOLOGY, V118, P587, DOI 10.1097/ALN.0b013e31827e52c6
   Ghassemi F, 2009, CELL CALCIUM, V45, P192, DOI 10.1016/j.ceca.2008.10.001
   Girard T, 2002, BRIT J ANAESTH, V89, P571, DOI 10.1093/bja/aef237
   Girard T, 2001, J BIOL CHEM, V276, P48077, DOI 10.1074/jbc.M107134200
   Giulivi C, 2011, J BIOL CHEM, V286, P99, DOI 10.1074/jbc.M110.153247
   Gomez AC, 2016, AM J PHYSIOL-CELL PH, V311, pC749, DOI 10.1152/ajpcell.00134.2016
   Goonasekera SA, 2007, J GEN PHYSIOL, V130, P365, DOI 10.1085/jgp.200709790
   Grievink H, 2010, ORPHANET J RARE DIS, V5, DOI 10.1186/1750-1172-5-10
   Groom L, 2011, ANESTHESIOLOGY, V115, P938, DOI 10.1097/ALN.0b013e3182320068
   Gupta VA, 2013, NEUROMUSCULAR DISORD, V23, P762, DOI 10.1016/j.nmd.2013.06.449
   HALL LW, 1966, BRIT MED J, V2, P1305, DOI 10.1136/bmj.2.5525.1305
   Hamada T, 2002, J MOL BIOL, V324, P123, DOI 10.1016/S0022-2836(02)01032-X
   Hanson MG, 2015, ELIFE, V4, DOI 10.7554/eLife.02923
   Hanson MG, 2015, DEV BIOL, V404, P76, DOI 10.1016/j.ydbio.2015.05.018
   Hanson MG, 2014, J NEUROSCI METH, V238, P95, DOI 10.1016/j.jneumeth.2014.09.013
   Haraki T, 2011, ANESTH ANALG, V113, P1461, DOI 10.1213/ANE.0b013e318232053e
   Henderson MJ, 2014, MOL BIOL CELL, V25, P2828, DOI 10.1091/mbc.E14-06-1141
   Hernandez-Ochoa EO, 2018, PHYSIOL REP, V6, DOI 10.14814/phy2.13822
   Hernandez-Ochoa EO, 2016, FRONT PHYSIOL, V6, DOI 10.3389/fphys.2015.00420
   HerrmannFrank A, 1996, BIOCHEM PHARMACOL, V52, P149, DOI 10.1016/0006-2952(96)00175-X
   Hirata H, 2007, DEVELOPMENT, V134, P2771, DOI 10.1242/dev.004531
   HOGAN K, 1992, ANESTH ANALG, V75, P441
   Hopkins PM, 2015, BRIT J ANAESTH, V115, P531, DOI 10.1093/bja/aev225
   Hoppe K, 2016, SCI REP-UK, V6, DOI 10.1038/srep33372
   Hurne AM, 2005, J BIOL CHEM, V280, P36994, DOI 10.1074/jbc.M506441200
   Ikemoto T, 1997, J PHYSIOL-LONDON, V501, P305, DOI 10.1111/j.1469-7793.1997.305bn.x
   IVANENKO A, 1995, J BIOL CHEM, V270, P4220, DOI 10.1074/jbc.270.9.4220
   Jiang DW, 2008, J BIOL CHEM, V283, P20813, DOI 10.1074/jbc.M801944200
   Johannsen S, 2016, NEUROMUSCULAR DISORD, V26, P21, DOI 10.1016/j.nmd.2015.11.001
   Jungbluth H, 2009, NEUROMUSCULAR DISORD, V19, P344, DOI 10.1016/j.nmd.2009.02.005
   Kaplan JC, 2017, NEUROMUSCULAR DISORD, V26, P895, DOI [10.1016/j.nmd.2016.11.010, DOI 10.1016/j.nmd.2016.11.010]
   Kashiyama T, 2010, PLOS ONE, V5, DOI 10.1371/journal.pone.0011526
   Kaufmann A, 2012, ANESTH ANALG, V114, P1017, DOI 10.1213/ANE.0b013e31824a95ad
   Kimura T, 2005, HUM MOL GENET, V14, P2189, DOI 10.1093/hmg/ddi223
   Knoblauch M, 2013, SKELET MUSCLE, V3, DOI 10.1186/2044-5040-3-22
   Kobayashi M, 2011, ANAESTH INTENS CARE, V39, P252, DOI 10.1177/0310057X1103900216
   Komazaki S, 1998, CELL TISSUE RES, V294, P467, DOI 10.1007/s004410051198
   Kondo T, 2018, J ANESTH, V32, P174, DOI 10.1007/s00540-018-2451-6
   Kraeva N, 2013, NEUROMUSCULAR DISORD, V23, P120, DOI 10.1016/j.nmd.2012.08.007
   Lanner JT, 2012, NAT MED, V18, P244, DOI 10.1038/nm.2598
   Laver DR, 1997, BIOPHYS J, V73, P1913, DOI 10.1016/S0006-3495(97)78222-5
   Lawal TA, 2018, NEUROTHERAPEUTICS, V15, P885, DOI 10.1007/s13311-018-00677-1
   LEDBETTER MW, 1994, J BIOL CHEM, V269, P31544
   Lee CS, 2017, NAT COMMUN, V8, DOI 10.1038/ncomms14659
   Lee EH, 2006, BIOCHEM BIOPH RES CO, V351, P909, DOI 10.1016/j.bbrc.2006.10.115
   Lefebvre R, 2013, PLOS ONE, V8, DOI 10.1371/journal.pone.0054042
   Lefebvre R, 2011, J PHYSIOL-LONDON, V589, P5361, DOI 10.1113/jphysiol.2011.216408
   Levano S, 2009, HUM MUTAT, V30, P590, DOI 10.1002/humu.20878
   Liang X, 2009, INTEGR BIOL-UK, V1, P533, DOI 10.1039/b907812f
   Litman RS, 2018, ANESTHESIOLOGY, V128, P159, DOI 10.1097/ALN.0000000000001877
   Loke JCP, 2003, ANESTHESIOLOGY, V99, P297, DOI 10.1097/00000542-200308000-00011
   Lopez JR, 2018, BRIT J ANAESTH, V121, P953, DOI 10.1016/j.bja.2018.07.008
   Lopez RJ, 2016, SCI SIGNAL, V9, DOI 10.1126/scisignal.aad9813
   Lorenzon NM, 2004, J BIOL CHEM, V279, P44057, DOI 10.1074/jbc.M405318200
   Loseth S, 2013, J NEUROL, V260, P1504, DOI 10.1007/s00415-012-6817-7
   Loy RE, 2012, PLOS ONE, V7, DOI 10.1371/journal.pone.0049757
   Loy RE, 2011, J GEN PHYSIOL, V137, P43, DOI 10.1085/jgp.201010523
   Lyfenko AD, 2007, HUM MUTAT, V28, P61, DOI 10.1002/humu.20409
   Lynch PJ, 1999, P NATL ACAD SCI USA, V96, P4164, DOI 10.1073/pnas.96.7.4164
   MacLennan DH, 2010, HDB CELL SIGNALING, P927
   Maffioletti SM, 2018, CELL REP, V23, P899, DOI 10.1016/j.celrep.2018.03.091
   Maleiner B, 2018, FRONT PHYSIOL, V9, DOI 10.3389/fphys.2018.01130
   Manno C, 2013, J PHYSIOL-LONDON, V591, P4439, DOI 10.1113/jphysiol.2013.259572
   Maryon EB, 1996, J CELL BIOL, V134, P885, DOI 10.1083/jcb.134.4.885
   Maryon EB, 1998, J CELL SCI, V111, P2885
   Matthews E, 2018, NEUROLOGY, V90, pE412, DOI 10.1212/WNL.0000000000004894
   Maves L, 2014, EXPERT OPIN DRUG DIS, V9, P1033, DOI 10.1517/17460441.2014.927435
   McKinney LC, 2006, ANESTHESIOLOGY, V104, P1191, DOI 10.1097/00000542-200606000-00014
   Mei YW, 2015, J BIOL CHEM, V290, P17535, DOI 10.1074/jbc.M115.659672
   Meissner G, 2017, J GEN PHYSIOL, V149, P1065, DOI 10.1085/jgp.201711878
   Merritt A, 2017, BRIT J ANAESTH, V118, P533, DOI 10.1093/bja/aex042
   Merritt A, 2012, BRIT J ANAESTH, V109, p663P
   Merritt A, 2010, BRIT J ANAESTH, V105, P718
   Michelucci A, 2017, OXIDATIVE MED CELLUL, V2017, P15
   Michelucci A, 2017, OXID MED CELL LONGEV, V2017, DOI 10.1155/2017/6792694
   Michelucci A, 2017, FASEB J, V31, P3649, DOI 10.1096/fj.201601292R
   Migita T, 2007, ANAESTH INTENS CARE, V35, P894, DOI 10.1177/0310057X0703500606
   Migita T, 2009, EUR J ANAESTH, V26, P124
   Migita T, 2009, J ANESTH, V23, P341, DOI 10.1007/s00540-009-0746-3
   Miyoshi H, 2014, EUR J ANAESTH, V31, P123, DOI 10.1097/00003643-201406001-00343
   Miyoshi H, 2015, ANESTH ANALG, V121, P994, DOI 10.1213/ANE.0000000000000886
   Monnier N, 2000, HUM MOL GENET, V9, P2599, DOI 10.1093/hmg/9.18.2599
   Monnier N, 2008, HUM MUTAT, V29, P670, DOI 10.1002/humu.20696
   Moore RA, 1998, J CELL BIOL, V140, P843, DOI 10.1083/jcb.140.4.843
   Murayama T, 2007, BIOCHEM J, V402, P349, DOI 10.1042/BJ20061040
   Murayama T, 2018, MOL PHARMACOL, V94, P722, DOI 10.1124/mol.117.111468
   Murayama T, 2016, HUM MUTAT, V37, P1231, DOI 10.1002/humu.23072
   Murayama T, 2015, PLOS ONE, V10, DOI 10.1371/journal.pone.0130606
   Murayama T, 2011, J BIOL CHEM, V286, P35571, DOI 10.1074/jbc.M111.255240
   Nakai J, 1996, NATURE, V380, P72, DOI 10.1038/380072a0
   Nakai J, 1998, J BIOL CHEM, V273, P13403, DOI 10.1074/jbc.273.22.13403
   Nakai J, 1997, P NATL ACAD SCI USA, V94, P1019, DOI 10.1073/pnas.94.3.1019
   NELSON TE, 1976, AM J PATHOL, V84, P197
   Nieto JE, 2009, J VET INTERN MED, V23, P619, DOI 10.1111/j.1939-1676.2009.0281.x
   North KN, 2014, NEUROMUSCULAR DISORD, V24, P97, DOI 10.1016/j.nmd.2013.11.003
   O-Uchi J, 2014, FASEB J, V28
   O'Brien JJ, 2002, BIOPHYS J, V82, P2428, DOI 10.1016/S0006-3495(02)75586-0
   O'Connell KMS, 2002, J GEN PHYSIOL, V120, P337, DOI 10.1085/jgp.20028617
   O'Connell KMS, 2000, J PHYSIOL-LONDON, V529, P647, DOI 10.1111/j.1469-7793.2000.00647.x
   ODriscoll S, 1996, BIOCHEM J, V319, P421, DOI 10.1042/bj3190421
   Oppenheim RW, 1997, J COMP NEUROL, V381, P353, DOI 10.1002/(SICI)1096-9861(19970512)381:3<353::AID-CNE7>3.0.CO;2-1
   OTSU K, 1991, GENOMICS, V11, P744, DOI 10.1016/0888-7543(91)90083-Q
   OTSU K, 1992, GENOMICS, V13, P835, DOI 10.1016/0888-7543(92)90163-M
   OUCHI J, 2017, FASEB J S1, V31
   OUCHI J, 2012, CIRC RES S, V111, pA370
   OUCHI J, 2016, FASEB J S1, V30
   Oyamada H, 2002, JPN J PHARMACOL, V88, P159, DOI 10.1254/jjp.88.159
   Parker Remai, 2017, J Neuromuscul Dis, V4, P147, DOI 10.3233/JND-170210
   Perez CF, 2005, AM J PHYSIOL-CELL PH, V288, pC640, DOI 10.1152/ajpcell.00407.2004
   Perez CF, 2003, J BIOL CHEM, V278, P39644, DOI 10.1074/jbc.M305160200
   Petrovski S, 2013, PLOS GENET, V9, DOI 10.1371/journal.pgen.1003709
   Popovski ZT, 2016, BALK J MED GENET, V19, P75, DOI 10.1515/bjmg-2016-0039
   Proenza C, 2002, J BIOL CHEM, V277, P6530, DOI 10.1074/jbc.M106471200
   Protasi F, 2000, BIOPHYS J, V79, P2494, DOI 10.1016/S0006-3495(00)76491-5
   Protasi F, 1998, J CELL BIOL, V140, P831, DOI 10.1083/jcb.140.4.831
   Protasi F, 2004, AM J PHYSIOL-CELL PH, V286, pC662, DOI 10.1152/ajpcell.00081.2003
   Protasi F, 2002, BIOPHYS J, V83, P3230, DOI 10.1016/S0006-3495(02)75325-3
   Rebbeck RT, 2011, BIOPHYS J, V100, P922, DOI 10.1016/j.bpj.2011.01.022
   Roberts MC, 2001, ANESTHESIOLOGY, V95, P716, DOI 10.1097/00000542-200109000-00026
   Roesl C, 2014, CELL CALCIUM, V56, P195, DOI 10.1016/j.ceca.2014.07.004
   Rossi D, 2007, J MED GENET, V44, DOI 10.1136/jmg.2006.043794
   Ruiz A, 2019, QUANTITATIVE REDUCTI
   Sakube Y, 1997, J MOL BIOL, V267, P849, DOI 10.1006/jmbi.1997.0910
   Samtleben S, 2013, JOVE-J VIS EXP, DOI 10.3791/50317
   Sato K, 2013, ANESTHESIOLOGY, V119, P111, DOI 10.1097/ALN.0b013e31828cebfe
   Sato K, 2010, ANESTHESIOLOGY, V112, P1350, DOI 10.1097/ALN.0b013e3181d69283
   Scheffler TL, 2014, AM J PHYSIOL-CELL PH, V306, pC354, DOI 10.1152/ajpcell.00002.2013
   Schiemann AH, 2018, BRIT J ANAESTH, V121, P681, DOI 10.1016/j.bja.2018.05.051
   Schiemann AH, 2014, ANESTH ANALG, V118, P375, DOI 10.1213/ANE.0b013e3182a273ea
   Sei Y, 2002, ANESTHESIOLOGY, V97, P1052, DOI 10.1097/00000542-200211000-00005
   Sheridan DC, 2006, P NATL ACAD SCI USA, V103, P19760, DOI 10.1073/pnas.0609473103
   Sheridan DC, 2003, BIOPHYS J, V85, P3739, DOI 10.1016/S0006-3495(03)74790-0
   Shirvanyants D, 2014, BIOPHYS J, V106, P2375, DOI 10.1016/j.bpj.2014.04.023
   SHY GM, 1956, BRAIN, V79, P610, DOI 10.1093/brain/79.4.610
   Snoeck M, 2015, EUR J NEUROL, V22, P1094, DOI 10.1111/ene.12713
   Stange M, 2003, J BIOL CHEM, V278, P51693, DOI 10.1074/jbc.M310406200
   Stephens Jeremy, 2016, Temperature (Austin), V3, P328
   Stinckens A, 2007, ANIM GENET, V38, P67, DOI 10.1111/j.1365-2052.2006.01558.x
   Sullivan KMC, 2000, P NATL ACAD SCI USA, V97, P5942, DOI 10.1073/pnas.110145997
   Suman M, 2018, HUM MOL GENET, V27, P2367, DOI 10.1093/hmg/ddy149
   Sun JH, 2001, P NATL ACAD SCI USA, V98, P11158, DOI 10.1073/pnas.201289098
   Ta TA, 2007, NEUROTOXICOLOGY, V28, P770, DOI 10.1016/j.neuro.2006.08.007
   Takekura H, 1999, DEV DYNAM, V214, P372, DOI 10.1002/(SICI)1097-0177(199904)214:4<372::AID-AJA9>3.0.CO;2-Q
   TAKESHIMA H, 1995, EMBO J, V14, P2999, DOI 10.1002/j.1460-2075.1995.tb07302.x
   Tilgen N, 2001, HUM MOL GENET, V10, P2879, DOI 10.1093/hmg/10.25.2879
   Tong JF, 1999, J BIOL CHEM, V274, P693, DOI 10.1074/jbc.274.2.693
   Tong JF, 1997, J BIOL CHEM, V272, P26332, DOI 10.1074/jbc.272.42.26332
   TREVES S, 1994, BIOCHEM J, V301, P661, DOI 10.1042/bj3010661
   Treves S, 2011, HUM MOL GENET, V20, P589, DOI 10.1093/hmg/ddq506
   Truong KM, 2019, TOXICOL SCI, V167, P509, DOI 10.1093/toxsci/kfy256
   Vanden Abeele F, 2019, GENET MED, V21, P441, DOI 10.1038/s41436-018-0066-9
   Vega AV, 2011, J PHYSIOL-LONDON, V589, P4649, DOI 10.1113/jphysiol.2011.210765
   VOGELI P, 1994, ANIM GENET, V25, P59, DOI 10.1111/j.1365-2052.1994.tb00404.x
   Volpatti J, 2019, IDENTIFICATION DRUG
   Vukcevic M, 2013, J CELL SCI, V126, P3485, DOI 10.1242/jcs.130310
   Vukcevic M, 2010, ANESTH ANALG, V111, P185, DOI 10.1213/ANE.0b013e3181cbd815
   Wang Y, 2005, BIOPHYS J, V89, P256, DOI 10.1529/biophysj.104.056002
   Ward CW, 2000, J PHYSIOL-LONDON, V525, P91, DOI 10.1111/j.1469-7793.2000.t01-2-00091.x
   Ward CW, 2001, BIOPHYS J, V81, P3216, DOI 10.1016/S0006-3495(01)75957-7
   Wehner M, 2004, NEUROMUSCULAR DISORD, V14, P429, DOI 10.1016/j.nmd.2004.03.011
   Wehner M, 2003, GENET TEST, V7, P203, DOI 10.1089/109065703322537214
   Wehner M, 2003, CELL CALCIUM, V34, P163, DOI 10.1016/S0143-4160(03)00072-1
   Wehner M, 2002, CLIN GENET, V62, P135, DOI 10.1034/j.1399-0004.2002.620206.x
   Wei L, 2011, FASEB J, V25, P3068, DOI 10.1096/fj.11-187252
   Weigl LG, 2004, ANESTH ANALG, V99, P103, DOI 10.1213/01.ANE.0000118110.90277.D2
   Wilberger MS, 2015, EQUINE VET J, V47, P165, DOI 10.1111/evj.12255
   Wilson SW, 2002, RES PRO CEL, V40, P181
   Witherspoon JW, 2016, ACTA NEUROPATHOL COM, V4, DOI 10.1186/s40478-016-0392-6
   Witting N, 2018, ACTA NEUROL SCAND, V137, P452, DOI 10.1111/ane.12885
   Xu L, 2006, BIOPHYS J, V90, P443, DOI 10.1529/biophysj.105.072538
   Xu L, 2008, J BIOL CHEM, V283, P6321, DOI 10.1074/jbc.M707353200
   Xu L, 2018, J BIOL CHEM, V293, P19501, DOI 10.1074/jbc.RA118.004453
   Xu L, 2018, J BIOL CHEM, V293, P2015, DOI 10.1074/jbc.M117.803247
   Yamaguchi N, 2001, J BIOL CHEM, V276, P22579, DOI 10.1074/jbc.M102729200
   Yamaguchi N, 2011, AM J PHYSIOL-CELL PH, V300, pC998, DOI 10.1152/ajpcell.00370.2010
   Yamazawa T, 1997, J BIOL CHEM, V272, P8161, DOI 10.1074/jbc.272.13.8161
   Yang TZ, 2006, ANESTHESIOLOGY, V105, P1164, DOI 10.1097/00000542-200612000-00016
   Yang T, 2007, J BIOL CHEM, V282, P37471, DOI 10.1074/jbc.M701379200
   Yang TZ, 2007, AM J PHYSIOL-CELL PH, V292, pC1591, DOI 10.1152/ajpcell.00133.2006
   Yang TZ, 2003, J BIOL CHEM, V278, P25722, DOI 10.1074/jbc.M302165200
   Yarotskyy V, 2013, PLOS ONE, V8, DOI 10.1371/journal.pone.0077633
   Yarotskyy V, 2012, BIOPHYS J, V103, P202, DOI 10.1016/j.bpj.2012.06.001
   Yuen B, 2012, FASEB J, V26, P3587, DOI 10.1096/fj.11-197582err
   Zhao FY, 2001, J BIOL CHEM, V276, P13810, DOI 10.1074/jbc.M006104200
   Zhou H, 2007, BRAIN, V130, P2024, DOI 10.1093/brain/awm096
   Zhou HY, 2006, AM J HUM GENET, V79, P859, DOI 10.1086/508500
   Zhou HY, 2006, HUM MOL GENET, V15, P2791, DOI 10.1093/hmg/ddl221
   Zhou HY, 2010, NEUROMUSCULAR DISORD, V20, P166, DOI 10.1016/j.nmd.2009.12.005
   Zhu XS, 2004, CELL CALCIUM, V35, P165, DOI 10.1016/j.ceca.2003.09.002
   Zorzato F, 2003, HUM MOL GENET, V12, P379, DOI 10.1093/hmg/ddg032
   Zullo A, 2019, BIOMED RES INT, V2019, DOI 10.1155/2019/7638946
   Zullo A, 2018, J GEN PHYSIOL, V150, P111, DOI 10.1085/jgp.201711864
   Zullo A, 2009, HUM MUTAT, V30, pE575, DOI 10.1002/humu.20991
   Zvaritch E, 2007, P NATL ACAD SCI USA, V104, P18537, DOI 10.1073/pnas.0709312104
   Zvaritch E, 2019, CAN J ANESTH, V66, P540, DOI 10.1007/s12630-019-01320-z
   Zvaritch E, 2015, BIOCHEM BIOPH RES CO, V460, P34, DOI 10.1016/j.bbrc.2015.01.056
   Zvaritch E, 2009, P NATL ACAD SCI USA, V106, P21813, DOI 10.1073/pnas.0912126106
NR 296
TC 6
Z9 6
U1 4
U2 7
PU BMC
PI LONDON
PA CAMPUS, 4 CRINAN ST, LONDON N1 9XW, ENGLAND
EI 1750-1172
J9 ORPHANET J RARE DIS
JI Orphanet J. Rare Dis.
PD MAY 7
PY 2020
VL 15
IS 1
AR 113
DI 10.1186/s13023-020-01384-x
PG 35
WC Genetics & Heredity; Medicine, Research & Experimental
WE Science Citation Index Expanded (SCI-EXPANDED)
SC Genetics & Heredity; Research & Experimental Medicine
GA LN9TA
UT WOS:000533272300001
PM 32381029
OA Green Published, gold
DA 2022-04-10
ER

PT J
AU Liu, HW
   Banerjee, T
   Guan, XY
   Freitas, MA
   Parvin, JD
AF Liu, Hui-wen
   Banerjee, Tapahsama
   Guan, Xiaoyan
   Freitas, Michael A.
   Parvin, Jeffrey D.
TI The chromatin scaffold protein SAFB1 localizes SUMO-1 to the promoters
   of ribosomal protein genes to facilitate transcription initiation and
   splicing
SO NUCLEIC ACIDS RESEARCH
LA English
DT Article
ID breast cancer CELLS; RNA-POLYMERASE-II; NUCLEAR-MATRIX; SUMOYLATION;
   REPRESSION; INTERACTS; PATHWAY
AB Early steps of gene expression are a composite of promoter recognition, promoter activation, RNA synthesis and RNA processing, and it is known that SUMOylation, a post-translational modification, is involved in transcription regulation. We previously found that SUMO-1 marks chromatin at the proximal promoter regions of some of the most active housekeeping genes during interphase in human cells, but the SUMOylated target on the chromatin remained unclear. In this study, we found that SUMO-1 marks the promoters of ribosomal protein genes via modification of the Scaffold Associated Factor B (SAFB) protein, and the SUMOylated SAFB stimulated both the binding of RNA polymerase to promoters and pre-mRNA splicing. Depletion of SAFB decreased RNA polymerase II binding to promoters and nuclear processing of the mRNA, though mRNA stability was not affected. This study reveals an unexpected role of SUMO-1 and SAFB in the stimulatory coupling of promoter binding, transcription initiation and RNA processing.
C1 [Liu, Hui-wen; Banerjee, Tapahsama; Parvin, Jeffrey D.] Ohio State Univ, Dept Biomed Informat, Ctr Comprehens Canc, Columbus, OH 43210 USA.
   [Guan, Xiaoyan; Freitas, Michael A.] Ohio State Univ, Ctr Comprehens Canc, Dept Mol Virol Immunol & Med Genet, Columbus, OH 43210 USA.
RP Parvin, JD (corresponding author), Ohio State Univ, Dept Biomed Informat, Ctr Comprehens Canc, Columbus, OH 43210 USA.
EM Jeffrey.Parvin@osumc.edu
RI Parvin, Jeffrey D/C-8955-2009; Freitas, Michael/C-8953-2009; Guan,
   Xiaoyan/I-7500-2015
OI Freitas, Michael/0000-0002-3103-8410; 
FU Pelotonia Predoctoral Cancer Research Training Fellowship
FX Pelotonia Predoctoral Cancer Research Training Fellowship (to H-w. Liu).
   Funding for open access charge: Departmental funds.
CR Altmeyer M, 2013, MOL CELL, V52, P206, DOI 10.1016/j.molcel.2013.08.025
   Arao Y, 2000, ARCH BIOCHEM BIOPHYS, V380, P228, DOI 10.1006/abbi.2000.1938
   Chiodi I, 2000, J CELL SCI, V113, P4043
   FORRESTER WC, 1994, SCIENCE, V265, P1221, DOI 10.1126/science.8066460
   Garee J.P., 2011, BIOCH BIOPHYS RES CO, V408, P516
   Geiss-Friedlander R, 2007, NAT REV MOL CELL BIO, V8, P947, DOI 10.1038/nrm2293
   Guo BQ, 2009, MOL CELL BIOL, V29, P3204, DOI 10.1128/MCB.01128-08
   Hammerich-Hille S, 2010, J BIOL CHEM, V285, P3608, DOI 10.1074/jbc.M109.066431
   Jenke ACW, 2004, P NATL ACAD SCI USA, V101, P11322, DOI 10.1073/pnas.0401355101
   Jian OY, 2009, MOL CELL, V34, P145, DOI 10.1016/j.molcel.2009.03.013
   Liu HW, 2012, NUCLEIC ACIDS RES, V40, P10172, DOI 10.1093/nar/gks819
   Lyst MJ, 2006, EMBO J, V25, P5317, DOI 10.1038/sj.emboj.7601404
   Hernandez-Hernandez JM, 2013, NUCLEIC ACIDS RES, V41, P5704, DOI 10.1093/nar/gkt285
   Melnik S, 2011, NAT METHODS, V8, P963, DOI [10.1038/NMETH.1705, 10.1038/nmeth.1705]
   Mortillaro MJ, 1996, P NATL ACAD SCI USA, V93, P8253, DOI 10.1073/pnas.93.16.8253
   Nacerddine K, 2005, DEV CELL, V9, P769, DOI 10.1016/j.devcel.2005.10.007
   Nayler O, 1998, NUCLEIC ACIDS RES, V26, P3542, DOI 10.1093/nar/26.15.3542
   Neyret-Kahn H, 2013, GENOME RES, V23, P1563, DOI 10.1101/gr.154872.113
   Oesterreich S, 2000, MOL ENDOCRINOL, V14, P369, DOI 10.1210/me.14.3.369
   Oesterreich S, 1997, J CELL BIOCHEM, V67, P275, DOI 10.1002/(SICI)1097-4644(19971101)67:2<275::AID-JCB13>3.0.CO;2-E
   Pelisch F, 2010, P NATL ACAD SCI USA, V107, P16119, DOI 10.1073/pnas.1004653107
   Psakhye I, 2012, CELL, V151, P807, DOI 10.1016/j.cell.2012.10.021
   Rodriguez MS, 1999, EMBO J, V18, P6455, DOI 10.1093/emboj/18.22.6455
   Rosonina E, 2003, J BIOL CHEM, V278, P43034, DOI 10.1074/jbc.M307289200
   Rosonina E, 2010, GENE DEV, V24, P1242, DOI 10.1101/gad.1917910
   Shilo Y, 2003, P NATL ACAD SCI USA, V100, P13225, DOI 10.1073/pnas.1735528100
   Sims RJ, 2007, MOL CELL, V28, P665, DOI 10.1016/j.molcel.2007.11.010
   Tai HH, 2003, BIOCHEM BIOPH RES CO, V308, P170, DOI 10.1016/S0006-291X(03)01354-8
   Thompson NE, 1996, METHOD ENZYMOL, V274, P513
   Xu H, 2008, BMC BIOINFORMATICS, V9, DOI 10.1186/1471-2105-9-347
NR 30
TC 20
Z9 20
U1 0
U2 8
PU OXFORD UNIV PRESS
PI OXFORD
PA GREAT CLARENDON ST, OXFORD OX2 6DP, ENGLAND
SN 0305-1048
EI 1362-4962
J9 NUCLEIC ACIDS RES
JI Nucleic Acids Res.
PD APR 20
PY 2015
VL 43
IS 7
BP 3605
EP 3613
DI 10.1093/nar/gkv246
PG 9
WC Biochemistry & Molecular Biology
WE Science Citation Index Expanded (SCI-EXPANDED)
SC Biochemistry & Molecular Biology
GA CI4MD
UT WOS:000354722500023
PM 25800734
OA gold, Green Submitted, Green Published
DA 2022-04-10
ER

PT J
AU Gordon, JAR
   Montecino, MA
   Aqeilan, RI
   Stein, JL
   Stein, GS
   Lian, JB
AF Gordon, Jonathan A. R.
   Montecino, Martin A.
   Aqeilan, Rami I.
   Stein, Janet L.
   Stein, Gary S.
   Lian, Jane B.
TI Epigenetic pathway Regulating Bone Homeostasis: Potential Targeting for
   Intervention of Skeletal Disorders
SO CURRENT OSTEOPOROSIS REPORTS
LA English
DT Article
DE Epigenetic marks in bone; DNA methylation; histone modification; miRNA;
   Osteoblast regulation; Osteosarcoma miRNAs
ID LONG NONCODING RNAS; MESENCHYMAL STEM-CELLS; WWOX TUMOR-SUPPRESSOR;
   TRANSCRIPTION FACTOR RUNX2; RAT OSTEOCALCIN GENE; HUMAN breast cancer;
   OSTEOGENIC DIFFERENTIATION; OSTEOBLAST DIFFERENTIATION; DNA METHYLATION;
   MICRORNA BIOGENESIS
AB Epigenetic regulation utilizes different mechanism to convey heritable traits to progeny cells that are independent of DNA sequence, including DNA silencing, post-translational modification of histone proteins, and the post-transcriptional modulation of RNA transcript levels by noncoding RNAs. Although long non-coding RNAs have recently emerged as important regulators of gene imprinting, their functions during osteogenesis are as yet unexplored. In contrast, microRNAs (miRNAs) are well characterized for their control of osteogenic and osteoclastic pathway; thus, further defining how gene regulatory networks essential for skeleton functions are coordinated and finely tuned through the activities of miRNAs. Roles of miRNAs are constantly expanding as new studies uncover associations with skeletal disorders. The distinct functions of epigenetic regulators and evidence for integrating their activities to control normal bone gene expression and bone disease will be presented. In addition, potential for using "signature miRNAs" to identify, manage, and therapeutically treat osteosarcoma will be discussed in this review.
C1 [Gordon, Jonathan A. R.; Stein, Janet L.; Stein, Gary S.; Lian, Jane B.] Univ Vermont, Coll Med, Dept Biochem, Burlington, VT 05405 USA.
   [Gordon, Jonathan A. R.; Stein, Janet L.; Stein, Gary S.; Lian, Jane B.] Univ Vermont, Coll Med, Vermont Canc Ctr, Burlington, VT 05405 USA.
   [Montecino, Martin A.] Univ Andres Bello, Ctr Invest Biomed, Santiago, Chile.
   [Montecino, Martin A.] Univ Andres Bello, FONDAP Ctr Genome Regulat, Santiago, Chile.
   [Aqeilan, Rami I.] Hebrew Univ Jerusalem, Hadassah Med Sch, Lautenberg Ctr Immunol & Canc Res IMRIC, IL-91120 Jerusalem, Israel.
RP Lian, JB (corresponding author), Univ Vermont, Coll Med, Dept Biochem, 89 Beaumont Ave, Burlington, VT 05405 USA.
EM jane.lian@uvm.edu
RI Gordon, Jonathan/B-3904-2016; Aqeilan, Rami/AAT-7785-2020; Aqeilan,
   Rami/R-4443-2016
OI Gordon, Jonathan/0000-0003-2644-696X; Aqeilan, Rami/0000-0002-6034-023X
FU National Institutes of Health (National Cancer Institute)United States
   Department of Health & Human ServicesNational Institutes of Health (NIH)
   - USANIH National Cancer Institute (NCI) [P01 CA082834]; National
   Institutes of Health (National Institute of Dental and Craniofacial
   Research)United States Department of Health & Human ServicesNational
   Institutes of Health (NIH) - USANIH National Institute of Dental &
   Craniofacial Research (NIDCR) [R37 DE012528]; National Institutes of
   Health (National Institute of Arthritis and Musculoskeletal and Skin
   Diseases)United States Department of Health & Human ServicesNational
   Institutes of Health (NIH) - USANIH National Institute of Arthritis &
   Musculoskeletal & Skin Diseases (NIAMS) [R01 AR039588, P01 AR048818];
   US-Israel Binational Science FoundationUS-Israel Binational Science
   Foundation [2011300]; FONDAP [15090007]; NATIONAL CANCER INSTITUTEUnited
   States Department of Health & Human ServicesNational Institutes of
   Health (NIH) - USANIH National Cancer Institute (NCI) [P01CA082834]
   Funding Source: NIH RePORTER; NATIONAL INSTITUTE OF ARTHRITIS AND
   MUSCULOSKELETAL AND SKIN DISEASESUnited States Department of Health &
   Human ServicesNational Institutes of Health (NIH) - USANIH National
   Institute of Arthritis & Musculoskeletal & Skin Diseases (NIAMS)
   [R01AR039588, P01AR048818] Funding Source: NIH RePORTER; NATIONAL
   INSTITUTE OF DENTAL & CRANIOFACIAL RESEARCHUnited States Department of
   Health & Human ServicesNational Institutes of Health (NIH) - USANIH
   National Institute of Dental & Craniofacial Research (NIDCR)
   [R37DE012528] Funding Source: NIH RePORTER
FX We thank Jennifer Diaz for manuscript preparation and formatting, and S.
   H. Ralston of the Molecular Medicine Centre and Western General Hospital
   (Edinburgh, UK) and M. L. Johnson of the University of Missouri (Kansas
   City, USA) for their review of the manuscript. The authors acknowledge
   financial support from the National Institutes of Health (National
   Cancer Institute P01 CA082834, National Institute of Dental and
   Craniofacial Research R37 DE012528, National Institute of Arthritis and
   Musculoskeletal and Skin Diseases R01 AR039588 and P01 AR048818), and
   the US-Israel Binational Science Foundation (2011300), and FONDAP
   15090007.
CR Aqeilan RI, 2008, J BIOL CHEM, V283, P21629, DOI 10.1074/jbc.M800855200
   Aslibekyan S, 2015, TRANSL RES, V165, P143, DOI 10.1016/j.trsl.2014.04.004
   Baer C, 2013, CANCER RES, V73, P473, DOI 10.1158/0008-5472.CAN-12-3731
   Baglio SR, 2013, GENE, V527, P321, DOI 10.1016/j.gene.2013.06.021
   Barter MJ, 2012, OSTEOARTHR CARTILAGE, V20, P339, DOI 10.1016/j.joca.2011.12.012
   Barter MJ, 2013, CURR RHEUMATOL REP, V15, DOI 10.1007/s11926-013-0353-z
   Berendsen AD, 2014, CELL MOL LIFE SCI, V71, P493, DOI 10.1007/s00018-013-1440-z
   Bernstein BE, 2006, CELL, V125, P315, DOI 10.1016/j.cell.2006.02.041
   Bi CL, 2014, BIOMED RES INT, V2014, DOI 10.1155/2014/521586
   Bradley EW, 2011, CRIT REV EUKAR GENE, V21, P101
   Brennecke P, 2014, CLIN EXP METASTAS, V31, P339, DOI 10.1007/s10585-013-9632-3
   Browne G, 2014, TRENDS ENDOCRIN MET, V25, P320, DOI 10.1016/j.tem.2014.03.014
   Butler JS, 2012, EPIGENOMICS-UK, V4, P163, DOI [10.2217/epi.12.3, 10.2217/EPI.12.3]
   Calin GA, 2006, NAT REV CANCER, V6, P857, DOI 10.1038/nrc1997
   Cech TR, 2014, CELL, V157, P77, DOI 10.1016/j.cell.2014.03.008
   Chen C, 2014, J BONE MINER RES, V29, P338, DOI 10.1002/jbmr.2032
   Chen Q, 2013, PLOS ONE, V8, DOI 10.1371/journal.pone.0058104
   Croset M, 2014, MOLECULES, V19, P10115, DOI 10.3390/molecules190710115
   Cruzat F, 2009, BIOCHEMISTRY-US, V48, P7287, DOI 10.1021/bi9004792
   Dasen JS, 2013, CELL REP, V5, P1, DOI 10.1016/j.celrep.2013.09.033
   Dawson MA, 2012, CELL, V150, P12, DOI 10.1016/j.cell.2012.06.013
   de Andres MC, 2013, PLOS ONE, V8, DOI 10.1371/journal.pone.0054957
   Del Mare S, 2011, AM J CANCER RES, V1, P585
   Delgado-Calle J, 2013, ARTHRITIS RHEUM-US, V65, P197, DOI 10.1002/art.37753
   Delgado-Calle J, 2012, CURR GENOMICS, V13, P252, DOI 10.2174/138920212800543129
   Deng Y, 2013, BIOMATERIALS, V34, P6717, DOI 10.1016/j.biomaterials.2013.05.042
   Dey BK, 2014, GENE DEV, V28, P491, DOI 10.1101/gad.234419.113
   Djebali S, 2012, NATURE, V489, P101, DOI 10.1038/nature11233
   Dong SW, 2012, BIOCHEM BIOPH RES CO, V418, P587, DOI 10.1016/j.bbrc.2012.01.075
   Ell B, 2014, J BIOL CHEM, V289, P21888, DOI 10.1074/jbc.M114.582866
   Ell B, 2013, CANCER CELL, V24, P542, DOI 10.1016/j.ccr.2013.09.008
   Esquela-Kerscher A, 2006, NAT REV CANCER, V6, P259, DOI 10.1038/nrc1840
   Fetahu IS, 2014, FRONT PHYSIOL, V5, DOI 10.3389/fphys.2014.00164
   Finnegan EF, 2013, CRIT REV BIOCHEM MOL, V48, P51, DOI 10.3109/10409238.2012.738643
   Flynn RA, 2014, CELL STEM CELL, V14, P752, DOI 10.1016/j.stem.2014.05.014
   Gamez B, 2014, J MOL ENDOCRINOL, V52, pR179, DOI 10.1530/JME-13-0294
   Gamez B, 2013, J BIOL CHEM, V288, P14264, DOI 10.1074/jbc.M112.432104
   Gaur T, 2010, DEV BIOL, V340, P10, DOI 10.1016/j.ydbio.2010.01.008
   Gordon JAR, 2010, MOL CELL BIOL, V30, P3531, DOI 10.1128/MCB.00889-09
   Gromak N, 2012, BIOCHEM SOC T, V40, P759, DOI 10.1042/BST20120023
   Gutierrez J, 2007, J BIOL CHEM, V282, P9445, DOI 10.1074/jbc.M609847200
   Ha M, 2014, NAT REV MOL CELL BIO, V15, P509, DOI 10.1038/nrm3838
   Hakelien AM, 2014, STEM CELLS, V32, P2780, DOI 10.1002/stem.1759
   Hargreaves DC, 2011, CELL RES, V21, P396, DOI 10.1038/cr.2011.32
   Hashimoto K, 2013, J BIOL CHEM, V288, P10061, DOI 10.1074/jbc.M112.421156
   Hassan MQ, 2007, MOL CELL BIOL, V27, P3337, DOI 10.1128/MCB.01544-06
   Hassan MQ, 2012, J BIOL CHEM, V287, P42084, DOI 10.1074/jbc.M112.377515
   Hassan MQ, 2010, P NATL ACAD SCI USA, V107, P19879, DOI 10.1073/pnas.1007698107
   Hemming S, 2014, STEM CELLS, V32, P802, DOI 10.1002/stem.1573
   Hu XQ, 2013, STEM CELLS DEV, V22, P248, DOI 10.1089/scd.2012.0105
   Huang J, 2010, STEM CELLS, V28, P357, DOI 10.1002/stem.288
   Huang S, 2012, STEM CELLS DEV, V21, P2531, DOI 10.1089/scd.2012.0014
   Imagawa K, 2014, ARTHRITIS RHEUMATOL, V66, P3040, DOI 10.1002/art.38774
   Jeffries MA, 2014, ARTHRITIS RHEUMATOL, V66, P2804, DOI 10.1002/art.38762
   Jia J, 2013, FEBS LETT, V587, P3027, DOI 10.1016/j.febslet.2013.07.030
   Jones KB, 2012, CANCER RES, V72, P1865, DOI 10.1158/0008-5472.CAN-11-2663
   Kapinas K, 2011, ARTHRITIS RES THER, V13, DOI 10.1186/ar3325
   Kawai M, 2012, J INTERN MED, V272, P317, DOI 10.1111/j.1365-2796.2012.02564.x
   Kilpinen H, 2012, HUM MOL GENET, V21, pR24, DOI 10.1093/hmg/dds383
   Kimura H, 2013, J HUM GENET, V58, P439, DOI 10.1038/jhg.2013.66
   Kohli RM, 2013, NATURE, V502, P472, DOI 10.1038/nature12750
   Krzeszinski JY, 2014, NATURE, V512, P431, DOI 10.1038/nature13375
   Kurek KC, 2010, CANCER RES, V70, P5577, DOI 10.1158/0008-5472.CAN-09-4602
   Lee JT, 2013, CELL, V152, P1308, DOI 10.1016/j.cell.2013.02.016
   Lee JY, 2006, MOL CELLS, V22, P182
   Lehmann U, 2014, CELL TISSUE RES, V356, P657, DOI 10.1007/s00441-014-1793-0
   Lei SF, 2011, J BONE MINER RES, V26, P72, DOI 10.1002/jbmr.186
   Li EQ, 2014, MOL CELL BIOCHEM, V390, P69, DOI 10.1007/s11010-013-1957-3
   Li H, 2009, J CLIN INVEST, V119, P3666, DOI 10.1172/JCI39832
   Li J, 2013, CELL DEATH DIS, V4, DOI 10.1038/cddis.2013.348
   Li LJ, 2013, CELL REP, V5, P3, DOI 10.1016/j.celrep.2013.09.003
   Li Z, 2008, P NATL ACAD SCI USA, V105, P13906, DOI 10.1073/pnas.0804438105
   Li ZY, 2009, J BIOL CHEM, V284, P15676, DOI 10.1074/jbc.M809787200
   Lian JB, 2012, NAT REV ENDOCRINOL, V8, P212, DOI 10.1038/nrendo.2011.234
   Liang WQ, 2013, FRONT BIOSCI-LANDMRK, V18, P788, DOI 10.2741/4142
   Liao L, 2013, CELL DEATH DIS, V4, DOI 10.1038/cddis.2013.130
   Ling H, 2013, NAT REV DRUG DISCOV, V12, P847, DOI 10.1038/nrd4140
   Liu H, 2014, J CELL PHYSIOL, V229, P1494, DOI 10.1002/jcp.24591
   Luetke A, 2014, CANCER TREAT REV, V40, P523, DOI 10.1016/j.ctrv.2013.11.006
   Maire G, 2011, CANCER GENET-NY, V204, P138, DOI 10.1016/j.cancergen.2010.12.012
   Martin J. W., 2011, Sarcoma, V2011, P282745, DOI 10.1155/2011/282745
   Miao JL, 2013, TUMOR BIOL, V34, P2093, DOI 10.1007/s13277-013-0940-7
   Montecino M, 1996, BIOCHEMISTRY-US, V35, P5093, DOI 10.1021/bi952489s
   Montecino M, 2007, BIOCHEM CELL BIOL, V85, P419, DOI 10.1139/O07-070
   Mortus JR, 2014, ADV EXP MED BIOL, V804, P93, DOI 10.1007/978-3-319-04843-7_5
   Murr R, 2010, ADV GENET, V70, P101, DOI [10.1016/S0065-2660(10)70005-5, 10.1016/B978-0-12-380866-0.60005-8]
   Mutsaers AJ, 2014, BONE, V62, P56, DOI 10.1016/j.bone.2014.02.003
   Orom UA, 2013, CELL, V154, P1190, DOI 10.1016/j.cell.2013.08.028
   Ouyang L, 2013, MED ONCOL, V30, DOI 10.1007/s12032-012-0340-7
   Paci P, 2014, BMC SYST BIOL, V8, DOI 10.1186/1752-0509-8-83
   Pereira BP, 2009, J CELL PHYSIOL, V221, P778, DOI 10.1002/jcp.21921
   Prosser DE, 2004, TRENDS BIOCHEM SCI, V29, P664, DOI 10.1016/j.tibs.2004.10.005
   Razidlo DF, 2010, PLOS ONE, V5, DOI 10.1371/journal.pone.0011492
   Richardson BC, 2014, NAT REV RHEUMATOL, V10, P72, DOI 10.1038/nrrheum.2013.211
   Sadikovic B, 2010, BMC CANCER, V10, DOI 10.1186/1471-2407-10-202
   Sarge KD, 2005, TRENDS BIOCHEM SCI, V30, P605, DOI 10.1016/j.tibs.2005.09.004
   Seeliger C, 2014, J BONE MINER RES, V29, P1718, DOI 10.1002/jbmr.2175
   Sinha KM, 2010, EMBO J, V29, P68, DOI 10.1038/emboj.2009.332
   Stankov K, 2013, PEDIATRICS, V132, P1112, DOI 10.1542/peds.2013-1652
   Subramaniam D, 2014, FRONT ONCOL, V4, DOI 10.3389/fonc.2014.00080
   Sugatani T, 2013, J CELL BIOCHEM, V114, P1217, DOI 10.1002/jcb.24471
   Sugatani T, 2011, BLOOD, V117, P3648, DOI 10.1182/blood-2010-10-311415
   Taipaleenmaki H, 2012, EUR J ENDOCRINOL, V166, P359, DOI 10.1530/EJE-11-0646
   van der Deen M, 2012, J BIOL CHEM, V287, P4503, DOI 10.1074/jbc.M111.287771
   van der Eerden BCJ, 2014, ARCH BIOCHEM BIOPHYS, V561, P46, DOI 10.1016/j.abb.2014.04.016
   van Dijk SJ, 2015, INT J OBESITY, V39, P85, DOI 10.1038/ijo.2014.34
   van Wijnen AJ, 2013, CURR OSTEOPOROS REP, V11, P72, DOI 10.1007/s11914-013-0143-6
   Vance KW, 2014, TRENDS GENET, V30, P348, DOI 10.1016/j.tig.2014.06.001
   Vega RB, 2004, CELL, V119, P555, DOI 10.1016/j.cell.2004.10.024
   Villagra A, 2002, J CELL BIOCHEM, V85, P112, DOI 10.1002/jcb.10113
   Vimalraj S, 2014, J CELL PHYSIOL, V229, P1236, DOI 10.1002/jcp.24557
   Vrtacnik P, 2014, CLIN CHEM LAB MED, V52, P589, DOI 10.1515/cclm-2013-0770
   Wang J, 2010, DEV CELL, V19, P903, DOI 10.1016/j.devcel.2010.10.022
   Wang XG, 2013, NAT MED, V19, P93, DOI 10.1038/nm.3026
   Wang Y, 2012, PLOS ONE, V7, DOI 10.1371/journal.pone.0034641
   Wu H, 2014, GENOME BIOL, V15, DOI 10.1186/gb-2014-15-3-r52
   Wu L, 2010, MOL CELL, V38, P465, DOI 10.1016/j.molcel.2010.03.008
   Yang JL, 2013, BMC MED GENOMICS, V6, DOI 10.1186/1755-8794-6-56
   Yang L, 2012, J BONE MINER RES, V27, P1598, DOI 10.1002/jbmr.1621
   Ye L, 2012, CELL STEM CELL, V11, P50, DOI 10.1016/j.stem.2012.04.009
   Young DW, 2007, NATURE, V445, P442, DOI 10.1038/nature05473
   Young DW, 2005, J CELL BIOCHEM, V94, P720, DOI 10.1002/jcb.20332
   Zaidi SK, 2007, NAT REV CANCER, V7, P454, DOI 10.1038/nrc2149
   Zaidi SK, 2014, CANCER RES, V74, P420, DOI 10.1158/0008-5472.CAN-13-2837
   Zhang J, 2011, J BONE MINER RES, V26, P1953, DOI 10.1002/jbmr.377
   Zhang Y, 2011, P NATL ACAD SCI USA, V108, P9863, DOI 10.1073/pnas.1018493108
   Zhou GX, 2013, J INT MED RES, V41, P1, DOI 10.1177/0300060513475959
   Zhou SH, 2013, J STEROID BIOCHEM, V136, P156, DOI 10.1016/j.jsbmb.2012.09.002
   Zhou WY, 2014, DISCOV MED, V17, P301
   Zhou Y, 2014, J STEROID BIOCHEM, V144, P207, DOI 10.1016/j.jsbmb.2013.10.004
   Zhu ED, 2008, J BIOL CHEM, V283, P7361, DOI 10.1074/jbc.M703304200
   Zhu L, 2013, BIOCHEM BIOPH RES CO, V432, P612, DOI 10.1016/j.bbrc.2013.02.036
NR 132
TC 19
Z9 21
U1 0
U2 23
PU SPRINGER
PI NEW YORK
PA 233 SPRING ST, NEW YORK, NY 10013 USA
SN 1544-2241
J9 CURR OSTEOPOROS REP
JI Curr. Osteoporos. Rep.
PD DEC
PY 2014
VL 12
IS 4
BP 496
EP 506
DI 10.1007/s11914-014-0240-1
PG 11
WC Endocrinology & Metabolism
WE Science Citation Index Expanded (SCI-EXPANDED)
SC Endocrinology & Metabolism
GA AY0KB
UT WOS:000347284400014
PM 25260661
OA Green Accepted
DA 2022-04-10
ER

PT J
AU Crea, F
   Paolicchi, E
   Marquez, VE
   Danesi, R
AF Crea, Francesco
   Paolicchi, Elisa
   Marquez, Victor E.
   Danesi, Romano
TI Polycomb genes and cancer: Time for clinical application?
SO CRITICAL REVIEWS IN ONCOLOGY HEMATOLOGY
LA English
DT Review
DE Polycomb; Cancer stem cell; EZH2; BMI1; DZNeP
ID TUMOR-CELL PROLIFERATION; STEM-CELL; breast cancer; prostate cancer;
   INCREASED EXPRESSION; GROUP PROTEINS; PHARMACOLOGICAL DISRUPTION; BMI-1
   EXPRESSION; DNA METHYLATION; EZH2 EXPRESSION
AB Polycomb group genes (PcGs) are epigenetic effectors, essential for stem cell self-renewal and pluripotency. Two main Polycomb repressive complexes (PRC1, PRC2) mediate gene silencing through histone post-translational modification.
   PcGs have been the focus of investigation in cancer research. Many cancer types show an over-expression of PcGs, predicting poor prognosis, metastasis and chemoresistance. Genetic polymorphisms of EZH2 (a PRC2 component) are significantly associated to lung cancer risk. Recently, 3-Deazaneplanocin A (DZNeP) was identified as an efficient inhibitor of PRC2 activity. DZNeP impairs cancer stem cell self-renewal and tumorigenicity.
   Despite the well-established role of PcGs in cancer stem cell biology, few studies dissected the clinical significance of these genes. In this paper, we explore PcGs as predictive and prognostic factors in oncology, with particular emphasis on what they can add to current biomarkerss. We also propose a model for the rational development of DZNeP-based anticancer regimens and suggest the therapeutic applications of this drug. (C) 2011 Elsevier Ireland Ltd. All rights reserved.
C1 [Crea, Francesco; Paolicchi, Elisa; Danesi, Romano] Univ Pisa, Div Pharmacol, Dept Internal Med, I-56100 Pisa, Italy.
   [Marquez, Victor E.] NCI, Chem Biol Lab, Frederick, MD 21701 USA.
RP Crea, F (corresponding author), Univ Pisa, Div Pharmacol, Dept Internal Med, Via Roma 55, I-56100 Pisa, Italy.
EM fr.crea@gmail.com; eli.paolicchi@gmail.com
RI Danesi, Romano/AAC-9410-2019; Marquez, Victor/AAP-3549-2021; Danesi,
   Romano/J-7239-2018; Crea, Francesco/I-8383-2015
OI Danesi, Romano/0000-0002-4414-8934; Danesi, Romano/0000-0002-4414-8934;
   Crea, Francesco/0000-0002-4903-2973; Paolicchi,
   Elisa/0000-0001-6101-7576
FU Associazione Italiana per la Ricerca sul CancroFondazione AIRC per la
   ricerca sul cancro Funding Source: Custom
CR Al-Hajj M, 2003, P NATL ACAD SCI USA, V100, P3983, DOI 10.1073/pnas.0530291100
   Alajez NM, 2009, CELL DEATH DIFFER, V16, P1469, DOI 10.1038/cdd.2009.85
   Bachmann IM, 2006, J CLIN ONCOL, V24, P268, DOI 10.1200/JCO.2005.01.5180
   Beier Christoph P, 2011, Front Biosci (Elite Ed), V3, P701, DOI 10.2741/e280
   Berezovska OP, 2006, CELL CYCLE, V5, P1886
   Bhattacharyya J, 2009, ANN HEMATOL, V88, P333, DOI 10.1007/s00277-008-0603-8
   Bonnet D, 1997, NAT MED, V3, P730, DOI 10.1038/nm0797-730
   Breuer RHJ, 2004, NEOPLASIA, V6, P736, DOI 10.1593/neo.04160
   Cha TL, 2005, SCIENCE, V310, P306, DOI 10.1126/science.1118947
   Chang CJ, 2011, CANCER CELL, V19, P86, DOI 10.1016/j.ccr.2010.10.035
   Choi YJ, 2009, BREAST CANCER RES TR, V113, P83, DOI 10.1007/s10549-008-9909-4
   Collett K, 2006, CLIN CANCER RES, V12, P1168, DOI 10.1158/1078-0432.CCR-05-1533
   COULOMBE RA, 1995, EUR J DRUG METAB PH, V20, P197, DOI 10.1007/BF03189670
   Crea F, 2011, TRENDS PHARM SCI
   Crea F, 2010, INT J CANC
   Crea F, 2011, ANN ONCOL
   Crea F, 2011, MOL CANCER, V10, DOI 10.1186/1476-4598-10-40
   Crea F, 2010, MOL CANCER, V9, DOI 10.1186/1476-4598-9-265
   Crea F, 2009, EPIGENOMICS-UK, V1, P63, DOI [10.2217/epi.09.4, 10.2217/EPI.09.4]
   Czyzewska J, 2010, FOLIA HISTOCHEM CYTO, V48, P37, DOI 10.2478/v10042-010-0017-z
   Dick JE, 2009, NAT BIOTECHNOL, V27, P44, DOI 10.1038/nbt0109-44
   DORUDI S, 1995, BRIT J CANCER, V71, P614, DOI 10.1038/bjc.1995.119
   Douglas D, 2008, CANCER RES, V68, P6507, DOI 10.1158/0008-5472.CAN-07-6152
   Even-Ram S, 2007, CELL ADHES MIGR, V1, P152, DOI 10.4161/cam.1.3.5089
   Fiskus W, 2009, BLOOD, V114, P2733, DOI 10.1182/blood-2009-03-213496
   Francia G, 2011, NAT REV CANCER, V11, P135, DOI 10.1038/nrc3001
   Fujii S, 2011, ONCOGENE
   Ginis I, 2004, DEV BIOL, V269, P360, DOI 10.1016/j.ydbio.2003.12.034
   Guo WJ, 2007, CANCER RES, V67, P5083, DOI 10.1158/0008-5472.CAN-06-4368
   HAMBURGER AW, 1977, SCIENCE, V197, P461, DOI 10.1126/science.560061
   Hayry V, 2008, NEUROPATH APPL NEURO, V34, P555, DOI 10.1111/j.1365-2990.2008.00949.x
   Herranz N, 2008, MOL CELL BIOL, V28, P4772, DOI 10.1128/MCB.00323-08
   Holliday R, 2006, epigenetic-US, V1, P76, DOI 10.4161/epi.1.2.2762
   Hurt EM, 2008, MOL INTERV, V8, P140, DOI 10.1124/mi.8.3.7
   Jacobs JJL, 1999, NATURE, V397, P164, DOI 10.1038/16476
   Jirtle RL, 2009, EPIGENOMICS-UK, V1, P13, DOI 10.2217/epi.09.16
   Jones PA, 2001, NATURE, V409, P141, DOI 10.1038/35051677
   Junxia W, 2010, CANC SCI
   Karamitopoulou E, 2010, EUR J CANCER, V46, P1438, DOI 10.1016/j.ejca.2010.01.033
   Kavanaugh CJ, 2002, TRANSGENIC RES, V11, P617, DOI 10.1023/A:1021159705363
   Kim CFB, 2005, CELL, V121, P823, DOI 10.1016/j.cell.2005.03.032
   Klarmann GJ, 2009, CLIN EXP METASTAS, V26, P433, DOI 10.1007/s10585-009-9242-2
   Kleer CG, 2003, P NATL ACAD SCI USA, V100, P11606, DOI 10.1073/pnas.1933744100
   Kwon MJ, 2010, CARCINOGENESIS, V31, P974, DOI 10.1093/carcin/bgp336
   Li CW, 2007, CANCER RES, V67, P1030, DOI 10.1158/0008-5472.CAN-06-2030
   Li DW, 2010, J CANCER RES CLIN, V136, P997, DOI 10.1007/s00432-009-0745-7
   Li L, 2011, BREAST CANC RES TREA
   Lu CH, 2007, CANCER RES, V67, P1757, DOI 10.1158/0008-5472.CAN-06-3700
   Lukacs RU, 2010, CELL STEM CELL, V7, P682, DOI 10.1016/j.stem.2010.11.013
   Mathews LA, 2009, DIFFERENTIATION, V78, P1, DOI 10.1016/j.diff.2009.04.002
   Matsukawa Y, 2006, CANCER SCI, V97, P484, DOI 10.1111/j.1349-7006.2006.00203.x
   Mimori K, 2005, EJSO-EUR J SURG ONC, V31, P376, DOI 10.1016/j.ejso.2004.11.001
   Miranda TB, 2009, MOL CANCER THER, V8, P1579, DOI 10.1158/1535-7163.MCT-09-0013
   Monzani E, 2007, EUR J CANCER, V43, P935, DOI 10.1016/j.ejca.2007.01.017
   Nagase H, 2008, FEBS J, V275, P1617, DOI 10.1111/j.1742-4658.2008.06330.x
   O'Brien CA, 2007, NATURE, V445, P106, DOI 10.1038/nature05372
   Oldenhuis CNAM, 2008, EUR J CANCER, V44, P946, DOI 10.1016/j.ejca.2008.03.006
   Ougolkov AV, 2008, CLIN CANCER RES, V14, P6790, DOI 10.1158/1078-0432.CCR-08-1013
   Pallante P, 2010, EUR J CANCER, V46, P2304, DOI 10.1016/j.ejca.2010.05.011
   Plazas-Mayorca MD, 2010, MOL BIOSYST
   Puppe J, 2009, BREAST CANCER RES, V11, DOI 10.1186/bcr2354
   Qin L, 2008, BIOCHEM BIOPH RES CO, V371, P531, DOI 10.1016/j.bbrc.2008.04.117
   Raaphorst FM, 2003, NEOPLASIA, V5, P481, DOI 10.1016/S1476-5586(03)80032-5
   Raman JD, 2005, CLIN CANCER RES, V11, P8570, DOI 10.1158/1078-0432.CCR-05-1047
   Rao M, 2011, CANC RES
   Ricci-Vitiani L, 2007, NATURE, V445, P111, DOI 10.1038/nature05384
   Richardson GD, 2004, J CELL SCI, V117, P3539, DOI 10.1242/jcs.01222
   Richly H, 2011, CELL DEATH DIS, V2, DOI 10.1038/cddis.2011.84
   Sasaki M, 2008, LAB INVEST, V88, P873, DOI 10.1038/labinvest.2008.52
   Savage P, 2009, NAT CLIN PRACT ONCOL, V6, P43, DOI 10.1038/ncponc1260
   Seenundun S, 2010, EMBO J, V29, P1401, DOI 10.1038/emboj.2010.37
   Shipitsin M, 2008, LAB INVEST, V88, P459, DOI 10.1038/labinvest.2008.14
   Silva J, 2007, BREAST CANCER RES, V9, DOI 10.1186/bcr1760
   Singh SK, 2003, CANCER RES, V63, P5821
   Suva ML, 2009, CANCER RES, V69, P9211, DOI 10.1158/0008-5472.CAN-09-1622
   Szyf M, 2009, ANNU REV PHARMACOL, V49, P243, DOI 10.1146/annurev-pharmtox-061008-103102
   Tan J, 2007, GENE DEV, V21, P1050, DOI 10.1101/gad.1524107
   Thibault A, 1998, TUMORI, V84, P87, DOI 10.1177/030089169808400120
   Umbas R, 1997, INT J CANCER, V74, P374, DOI 10.1002/(SICI)1097-0215(19970822)74:4<374::AID-IJC2>3.0.CO;2-S
   van Kemenade FJ, 2001, BLOOD, V97, P3896, DOI 10.1182/blood.V97.12.3896
   van Leenders GJLH, 2007, EUR UROL, V52, P455, DOI 10.1016/j.eururo.2006.11.020
   Varambally S, 2002, NATURE, V419, P624, DOI 10.1038/nature01075
   Vrzalikova K, 2008, J CANCER RES CLIN, V134, P1037, DOI 10.1007/s00432-008-0361-y
   Wang H, 2011, UROL ONCOL
   Wang W, 2009, INT J CANCER, V125, P2836, DOI 10.1002/ijc.24721
   Wei YK, 2008, MOL CARCINOGEN, V47, P701, DOI 10.1002/mc.20413
   Wiederschain D, 2007, MOL CELL BIOL, V27, P4968, DOI 10.1128/MCB.02244-06
   Wu Z, 2011, CELL DEATH DIFFER
   Xu CR, 2009, MOL CANCER RES, V7, P1937, DOI 10.1158/1541-7786.MCR-09-0333
   Yoon KA, 2010, J THORAC ONCOL, V5, P10, DOI 10.1097/JTO.0b013e3181c422d9
   Yu J, 2007, CANCER RES, V67, P10657, DOI 10.1158/0008-5472.CAN-07-2498
   Zhang X, 2010, INT J GYNECOL CANCER, V20, P1597, DOI 10.1111/IGC.0b013e3181fd080e
   Zhao J, 2009, WORLD J GASTROENTERO, V15, P2145, DOI 10.3748/wjg.15.2145
   Zorn CS, 2007, CLIN CANCER RES, V13, P2136, DOI 10.1158/1078-0432.CCR-06-2381
NR 94
TC 61
Z9 67
U1 1
U2 26
PU ELSEVIER SCIENCE INC
PI NEW YORK
PA STE 800, 230 PARK AVE, NEW YORK, NY 10169 USA
SN 1040-8428
EI 1879-0461
J9 CRIT REV ONCOL HEMAT
JI Crit. Rev. Oncol./Hematol.
PD AUG
PY 2012
VL 83
IS 2
BP 184
EP 193
DI 10.1016/j.critrevonc.2011.10.007
PG 10
WC Oncology; Hematology
WE Science Citation Index Expanded (SCI-EXPANDED)
SC Oncology; Hematology
GA 988ZK
UT WOS:000307529800003
PM 22112692
DA 2022-04-10
ER

PT J
AU Hanson, DA
   Kaspar, AA
   Poulain, FR
   Krensky, AM
AF Hanson, DA
   Kaspar, AA
   Poulain, FR
   Krensky, AM
TI Biosynthesis of granulysin, a novel cytolytic molecule
SO MOLECULAR IMMUNOLOGY
LA English
DT Article
DE biochemistry; cytolytic granules; CTL; NK cells
ID CYTOTOXIC T-CELLS; NATURAL-KILLER; NK-LYSIN; REQUIREMENTS; ACTIVATION;
   pathway; RECEPTOR; PERFORIN; PROTEINS; BINDING
AB Granulysin is a newly described lytic molecule expressed by CTL and NK cells. Three mRNA (519, 520, and 522) and two protein products of 15 and 9 kDa are encoded by the granulysin gene. Stable transfectants overexpressing the predominate 520 mRNA were generated to determine the protein products originating from the translation of this message. A transfectant of the NK cell tumor YT overexpressed both 15 and 9 kDa proteins while a transfectant of the T cell tumor HuT78 produced mainly 15 kDa granulysin. Thus the 520 mRNA is sufficient for production of both 15 and 9 kDa granulysin. 9 kDa granulysin accumulated via post-translational processing of 15 kDa protein and was present intracellularly but not in the cell culture supernatant, indicating specific retention of the 9 kDa protein. An inhibitor of granule acidification, concanamycin A, blocked the processing of 15 kDa granulysin to the 9 kDa form. A deduced structural difference between the two forms of the protein and a decrease in lytic activity of 9 kDa granulysin at granule pH suggest two mechanism by which a granulysin expressing cell is protected from autolysis during the biosynthesis of this potentially harmful molecule. (C) 1999 Elsevier Science Ltd. All rights reserved.
C1 Stanford Univ, Sch Med, Dept Pediat, Div Immunol & Transplantat Biol, Stanford, CA 94305 USA.
   Univ Calif San Francisco, Dept Pediat, San Francisco, CA 94143 USA.
   Univ Calif San Francisco, Inst Cardiovasc Res, San Francisco, CA 94143 USA.
RP Krensky, AM (corresponding author), Stanford Univ, Sch Med, Dept Pediat, Div Immunol & Transplantat Biol, Stanford, CA 94305 USA.
EM mn.aln@forsythe.stanford.edu
RI Krensky, Alan/F-7956-2011
FU NIAID NIH HHSUnited States Department of Health & Human ServicesNational
   Institutes of Health (NIH) - USANIH National Institute of Allergy &
   Infectious Diseases (NIAID) [AI43348] Funding Source: Medline; NIDDK NIH
   HHSUnited States Department of Health & Human ServicesNational
   Institutes of Health (NIH) - USANIH National Institute of Diabetes &
   Digestive & Kidney Diseases (NIDDK) [R01 DK35008] Funding Source:
   Medline; NATIONAL INSTITUTE OF ALLERGY AND INFECTIOUS DISEASESUnited
   States Department of Health & Human ServicesNational Institutes of
   Health (NIH) - USANIH National Institute of Allergy & Infectious
   Diseases (NIAID) [R01AI043348, R21AI043348] Funding Source: NIH
   RePORTER; NATIONAL INSTITUTE OF DIABETES AND DIGESTIVE AND KIDNEY
   DISEASESUnited States Department of Health & Human ServicesNational
   Institutes of Health (NIH) - USANIH National Institute of Diabetes &
   Digestive & Kidney Diseases (NIDDK) [R01DK035008] Funding Source: NIH
   RePORTER
CR ANDERSSON M, 1995, EMBO J, V14, P1615, DOI 10.1002/j.1460-2075.1995.tb07150.x
   Chang R, 1998, BBA-BIOMEMBRANES, V1371, P254, DOI 10.1016/S0005-2736(98)00031-5
   Gamen S, 1998, J IMMUNOL, V161, P1758
   GAZDAR AF, 1980, BLOOD, V55, P409
   Griffiths G M, 1997, Semin Immunol, V9, P109, DOI 10.1006/smim.1997.0059
   GRIFFITHS GM, 1993, J CELL BIOL, V120, P885, DOI 10.1083/jcb.120.4.885
   Kataoka T, 1996, J IMMUNOL, V156, P3678
   Lane D., 1988, ANTIBODIES LAB MANUA
   Liepinsh E, 1997, NAT STRUCT BIOL, V4, P793, DOI 10.1038/nsb1097-793
   Lin S, 1996, J BIOL CHEM, V271, P19689, DOI 10.1074/jbc.271.33.19689
   Lowin B, 1995, Curr Top Microbiol Immunol, V198, P1
   MANNING WC, 1992, J IMMUNOL, V148, P4036
   MUNFORD RS, 1995, J LIPID RES, V36, P1653
   Pena S V, 1997, Semin Immunol, V9, P117, DOI 10.1006/smim.1997.0061
   Pena SV, 1997, J IMMUNOL, V158, P2680
   PENA SV, 1997, THESIS STANFORD U ST
   Stenger S, 1998, SCIENCE, V282, P121, DOI 10.1126/science.282.5386.121
   TRAPANI JA, 1993, IMMUNOL CELL BIOL, V71, P201, DOI 10.1038/icb.1993.22
   Uellner R, 1997, EMBO J, V16, P7287, DOI 10.1093/emboj/16.24.7287
   YABE T, 1990, J EXP MED, V172, P1159, DOI 10.1084/jem.172.4.1159
   YODOI J, 1985, J IMMUNOL, V134, P1623
NR 21
TC 87
Z9 99
U1 1
U2 3
PU PERGAMON-ELSEVIER SCIENCE LTD
PI OXFORD
PA THE BOULEVARD, LANGFORD LANE, KIDLINGTON, OXFORD OX5 1GB, ENGLAND
SN 0161-5890
J9 MOL IMMUNOL
JI Mol. Immunol.
PD MAY
PY 1999
VL 36
IS 7
BP 413
EP 422
DI 10.1016/S0161-5890(99)00063-2
PG 10
WC Biochemistry & Molecular Biology; Immunology
WE Science Citation Index Expanded (SCI-EXPANDED)
SC Biochemistry & Molecular Biology; Immunology
GA 220MJ
UT WOS:000081669500001
PM 10449094
DA 2022-04-10
ER

PT J
AU Krook, MA
   Hawkins, AG
   Patel, RM
   Lucas, DR
   Van Noord, R
   Chugh, R
   Lawlor, ER
AF Krook, Melanie A.
   Hawkins, Allegra G.
   Patel, Rajiv M.
   Lucas, David R.
   Van Noord, Raelene
   Chugh, Rashmi
   Lawlor, Elizabeth R.
TI A bivalent promoter contributes to stress-induced plasticity of CXCR4 in
   Ewing sarcoma
SO ONCOTARGET
LA English
DT Article
DE CXCR4; epigenetic; plasticity; Ewing sarcoma
ID CANCER-CELL PLASTICITY; TUMOR HETEROGENEITY; CHEMOKINE RECEPTORS;
   GENOMIC LANDSCAPE; STEM-CELLS; CHROMATIN; INHIBITION; mechanism;
   MUTATIONS; EWS-FLI1
AB Tumor heterogeneity is a major impediment to cancer cures. Tumor cell heterogeneity can arise by irreversible genetic mutation, as well as by non-mutational mechanism, which can be reversibly modulated by the tumor microenvironment and the epigenome. We recently reported that the chemokine receptor CXCR4 is induced in Ewing sarcoma cells in response to microenvironmental stress. In the current study, we investigated plasticity of CXCR4 expression in vivo and assessed whether CXCR4 impacts on tumor growth. Our studies showed that Ewing sarcoma cells convert between CXCR4 negative and CXCR4 positive states in vivo and that positive cells are most abundant adjacent to areas of necrosis. In addition, tumor volumes directly correlated with CXCR4 expression supporting a role for CXCR4 in growth promotion. Mechanistically, our results show that, in ambient conditions where CXCR4 expression is low, the CXCR4 promoter exists in a poised, bivalent state with simultaneous enrichment of both activating (H3K4me3) and repressive (H3K27me3) post-translational histone modification. In contrast, when exposed to stress, CXCR4 negative cells lose the H3K27me3 mark. This loss of promoter bivalency is associated with CXCR4 upregulation. These studies demonstrate that stress-dependent plasticity of CXCR4 is, in part, mediated by epigenetic plasticity and a bivalent promoter.
C1 [Krook, Melanie A.; Hawkins, Allegra G.; Van Noord, Raelene; Lawlor, Elizabeth R.] Univ Michigan, Translat Oncol Program, Ann Arbor, MI 48109 USA.
   [Krook, Melanie A.; Hawkins, Allegra G.; Van Noord, Raelene; Lawlor, Elizabeth R.] Univ Michigan, Dept Pediat & Communicable Dis, Ann Arbor, MI 48109 USA.
   [Patel, Rajiv M.; Lucas, David R.; Lawlor, Elizabeth R.] Univ Michigan, Dept Pathol, Ann Arbor, MI 48109 USA.
   [Chugh, Rashmi] Univ Michigan, Dept Internal Med, Ann Arbor, MI 48109 USA.
RP Lawlor, ER (corresponding author), Univ Michigan, Translat Oncol Program, Ann Arbor, MI 48109 USA.; Lawlor, ER (corresponding author), Univ Michigan, Dept Pediat & Communicable Dis, Ann Arbor, MI 48109 USA.; Lawlor, ER (corresponding author), Univ Michigan, Dept Pathol, Ann Arbor, MI 48109 USA.
EM elawlor@umich.edu
RI PATEL, Rajiv Michael/AAI-9424-2021
OI PATEL, Rajiv Michael/0000-0002-1521-4947
FU NIH: SARC SPOREUnited States Department of Health & Human
   ServicesNational Institutes of Health (NIH) - USA [1U01-CA114757,
   5T32-CA009676]; University of Michigan's Cancer Center Support Grant
   [P30 CA046592]; Evan Shapiro Fund; Sarcoma Research Fund of the
   University of Michigan Comprehensive Cancer Center; NATIONAL CANCER
   INSTITUTEUnited States Department of Health & Human ServicesNational
   Institutes of Health (NIH) - USANIH National Cancer Institute (NCI)
   [U54CA168512, P30CA046592, U01CA114757, T32CA009676] Funding Source: NIH
   RePORTER
FX The work was supported by grants from the NIH: SARC SPORE 1U01-CA114757,
   5T32-CA009676, and through the University of Michigan's Cancer Center
   Support Grant (P30 CA046592) by the use of the following Cancer Center
   Core(s): Flow cytometry, Sequencing, and Tumor Imaging Core. Additional
   financial support from the Evan Shapiro Fund to Combat Pediatric Cancer
   and the Sarcoma Research Fund of the University of Michigan
   Comprehensive Cancer Center is gratefully acknowledged.
CR Anderson JL, 2014, MOL CANCER RES, V12, P1740, DOI 10.1158/1541-7786.MCR-14-0159
   Bennani-Baiti IM, 2010, CLIN CANCER RES, V16, P3769, DOI 10.1158/1078-0432.CCR-10-0558
   Berghuis D, 2012, CLIN SARCOMA RES, V2, DOI 10.1186/2045-3329-2-24
   Bernstein BE, 2006, CELL, V125, P315, DOI 10.1016/j.cell.2006.02.041
   Borinstein SC, 2013, FRONT ONCOL, V3, DOI 10.3389/fonc.2013.00057
   Brohl AS, 2014, PLOS GENET, V10, DOI 10.1371/journal.pgen.1004475
   Busillo JM, 2007, BBA-BIOMEMBRANES, V1768, P952, DOI 10.1016/j.bbamem.2006.11.002
   Chaffer CL, 2013, CELL, V154, P61, DOI 10.1016/j.cell.2013.06.005
   Crompton BD, 2014, CANCER DISCOV, V4, P1326, DOI 10.1158/2159-8290.CD-13-1037
   De Vito C, 2012, CANCER CELL, V21, P807, DOI 10.1016/j.ccr.2012.04.023
   Diaz-Cano SJ, 2012, INT J MOL SCI, V13, P1951, DOI 10.3390/ijms13021951
   Domanska UM, 2013, EUR J CANCER, V49, P219, DOI 10.1016/j.ejca.2012.05.005
   Duda DG, 2011, CLIN CANCER RES, V17, P2074, DOI 10.1158/1078-0432.CCR-10-2636
   Dunham I, 2012, NATURE, V489, P57, DOI 10.1038/nature11247
   Gassmann P, 2009, NEOPLASIA, V11, P651, DOI 10.1593/neo.09272
   Gilfillan GD, 2012, BMC GENOMICS, V13, DOI 10.1186/1471-2164-13-645
   Junttila MR, 2013, NATURE, V501, P346, DOI 10.1038/nature12626
   Khoury JD, 2005, ADV ANAT PATHOL, V12, P212, DOI 10.1097/01.pap.0000175114.55541.52
   Krook MA, 2014, MOL CANCER RES, V12, P953, DOI 10.1158/1541-7786.MCR-13-0668
   Lawlor Elizabeth R., 2015, Critical Reviews in Oncogenesis, V20, P155, DOI 10.1615/CritRevOncog.2015013553
   Lawlor ER, 2012, CLIN CANCER RES, V18, P2768, DOI 10.1158/1078-0432.CCR-11-1921
   Marchese A, 2014, CURR OPIN CELL BIOL, V27, P72, DOI 10.1016/j.ceb.2013.11.011
   McCabe MT, 2012, NATURE, V492, P108, DOI 10.1038/nature11606
   Meacham CE, 2013, NATURE, V501, P328, DOI 10.1038/nature12624
   Meltzer Paul S, 2007, Cell Stem Cell, V1, P13, DOI 10.1016/j.stem.2007.05.011
   Mukherjee S, 2016, ONCOGENE
   Navin N, 2010, GENOME RES, V20, P68, DOI 10.1101/gr.099622.109
   Richter GHS, 2009, P NATL ACAD SCI USA, V106, P5324, DOI 10.1073/pnas.0810759106
   Riggi N, 2008, CANCER RES, V68, P2176, DOI 10.1158/0008-5472.CAN-07-1761
   Riggi N, 2014, CANCER CELL, V26, P668, DOI 10.1016/j.ccell.2014.10.004
   Sand LGL, 2015, EUR J CANCER, V51, P2624, DOI 10.1016/j.ejca.2015.08.020
   Sankar S, 2014, CLIN CANCER RES, V20, P4584, DOI 10.1158/1078-0432.CCR-14-0072
   Shukla N, 2013, FRONT ONCOL, V3, DOI 10.3389/fonc.2013.00141
   Sun XQ, 2010, CANCER METAST REV, V29, P709, DOI 10.1007/s10555-010-9256-x
   Suva ML, 2009, CANCER RES, V69, P1776, DOI 10.1158/0008-5472.CAN-08-2242
   Svoboda LK, 2014, epigenetic-US, V9, P1613, DOI 10.4161/15592294.2014.988048
   Tirode F, 2014, CANCER DISCOV, V4, P1342, DOI 10.1158/2159-8290.CD-14-0622
   Tomazou EM, 2015, CELL REP, V10, P1082, DOI 10.1016/j.celrep.2015.01.042
   van Doorninck JA, 2010, J CLIN ONCOL, V28, P1989, DOI 10.1200/JCO.2009.24.5845
   Volchenboum SL, 2015, J PATHOL CLIN RES, V1, P83, DOI 10.1002/cjp2.9
   von Levetzow C, 2011, PLOS ONE, V6, DOI 10.1371/journal.pone.0019305
   Wiles Elizabeth T, 2013, Genes Cancer, V4, P486, DOI 10.1177/1947601913506115
NR 42
TC 9
Z9 9
U1 0
U2 1
PU IMPACT JOURNALS LLC
PI ORCHARD PARK
PA 6666 E QUAKER ST, STE 1, ORCHARD PARK, NY 14127 USA
EI 1949-2553
J9 ONCOTARGET
JI Oncotarget
PD SEP 20
PY 2016
VL 7
IS 38
BP 61775
EP 61788
DI 10.18632/oncotarget.11240
PG 14
WC Oncology; Cell Biology
WE Science Citation Index Expanded (SCI-EXPANDED)
SC Oncology; Cell Biology
GA EB2CN
UT WOS:000387164700074
PM 27528222
OA gold, Green Published, Green Submitted
DA 2022-04-10
ER

PT J
AU Guppy, BJ
   McManus, KJ
AF Guppy, Brent J.
   McManus, Kirk J.
TI Mitotic Accumulation of Dimethylated Lysine 79 of Histone H3 Is
   Important for Maintaining Genome Integrity During Mitosis in Human Cells
SO GENETICS
LA English
DT Article
DE chromosomal instability; H2Bub1; H3K79me2; mitotic increase; RNF20;
   DOT1L
ID colorectal cancer CELLS; CHROMOSOMAL INSTABILITY; MAMMALIAN-CELLS;
   gene expression; METHYLATION; H2B; CHROMATIN; METHYLTRANSFERASE;
   PHOSPHORYLATION; UBIQUITINATION
AB The loss of genome stability is an early event that drives the development and progression of virtually all tumor types. Recent studies have revealed that certain histone post-translational modification exhibit dynamic and global increases in abundance that coincide with mitosis and exhibit essential roles in maintaining genomic stability. Histone H2B ubiquitination at lysine 120 (H2Bub1) is regulated by RNF20, an E3 ubiquitinationligase that is altered in many tumor types. Through an evolutionarily conserved trans-histone pathway, H2Bub1 is an essential prerequisite for subsequent downstream dimethylation events at lysines 4 (H3K4me2) and 79 (H3K79me2) of histone H3. Although the role that RNF20 plays in tumorigenesis has garnered much attention, the downstream components of the trans-histone pathway, H3K4me2 and H3K79me2, and their potential contributions to genome stability remain largely overlooked. In this study, we employ single-ell imaging and biochemical approaches to investigate the spatial and temporal patterning of RNF20, H2Bub1, H3K4me2, and H3K79me2 throughout the cell cycle, with a particular focus on mitosis. We show that H2Bub1, H3K4me2, and H3K79me2 exhibit distinct temporal progression patterns throughout the cell cycle. Most notably, we demonstrate that H3K79me2 is a highly dynamic histone post-translational modification that reaches maximal abundance during mitosis in an H2Bub1-independent manner. Using RNAi and chemical genetic approaches, we identify DOT1L as a histone methyltransferase required for the mitotic-associated increases in H3K79me2. We also demonstrate that the loss of mitotic H3K79me2 levels correlates with increases in chromosome numbers and increases in mitotic defects. Collectively, these data suggest that H3K79me2 dynamics during mitosis are normally required to maintain genome stability and further implicate the loss of H3K79me2 during mitosis as a pathogenic event that contributes to the development and progression of tumors.
C1 [Guppy, Brent J.; McManus, Kirk J.] Univ Manitoba, Manitoba Inst Cell Biol, Dept Biochem & Med Genet, Winnipeg, MB R3E 0V9, Canada.
RP McManus, KJ (corresponding author), Manitoba Inst Cell Biol, ON6010-675 McDermot Ave, Winnipeg, MB R3E 0V9, Canada.
EM Kirk.McManus@umanitoba.ca
OI McManus, Kirk/0000-0003-0081-8737
FU Canadian Institutes of Health Research operating grantCanadian
   Institutes of Health Research (CIHR) [MOP-115179]; Manitoba Health
   Research Council/CancerCare Manitoba fellowship; Manitoba Institute of
   Cell Biology and CancerCare Manitoba
FX We thank C. P. Case for generously providing the hTERT cells and Abcam
   for supplying antibodies. We thank Zelda Lichtensztejn, Nermin Moujani,
   and Alexandra Kuzyk for technical assistance. This work was funded by a
   Canadian Institutes of Health Research operating grant (MOP-115179) (to
   K.J.M.) and a Manitoba Health Research Council/CancerCare Manitoba
   fellowship (to B.J.G.). We also acknowledge the strong support of the
   Manitoba Institute of Cell Biology and CancerCare Manitoba.
CR Ahmad K, 2002, MOL CELL, V9, P1191, DOI 10.1016/S1097-2765(02)00542-7
   Barber TD, 2008, P NATL ACAD SCI USA, V105, P3443, DOI 10.1073/pnas.0712384105
   Barry ER, 2009, STEM CELLS, V27, P1538, DOI 10.1002/stem.86
   BYVOET P, 1972, ARCH BIOCHEM BIOPHYS, V148, P558, DOI 10.1016/0003-9861(72)90174-9
   Chandrasekharan MB, 2010, epigenetic-US, V5, DOI 10.4161/epi.5.6.12314
   Chernikova SB, 2012, CANCER RES, V72, P2111, DOI 10.1158/0008-5472.CAN-11-2209
   DAVIE JR, 1990, BIOCHEMISTRY-US, V29, P4752, DOI 10.1021/bi00472a002
   Dover J, 2002, J BIOL CHEM, V277, P28368, DOI 10.1074/jbc.C200348200
   DUERRE JA, 1974, J NEUROCHEM, V23, P541, DOI 10.1111/j.1471-4159.1974.tb06057.x
   Egli D, 2008, NAT REV MOL CELL BIO, V9, P505, DOI 10.1038/nrm2439
   Feng Q, 2002, CURR BIOL, V12, P1052, DOI 10.1016/S0960-9822(02)00901-6
   Fierz B, 2011, NAT CHEM BIOL, V7, P113, DOI 10.1038/NCHEMBIO.501
   Forbes SA, 2011, NUCLEIC ACIDS RES, V39, pD945, DOI 10.1093/nar/gkq929
   Goto H, 2002, GENES CELLS, V7, P11, DOI 10.1046/j.1356-9597.2001.00498.x
   Heit R, 2009, J CELL SCI, V122, P2957, DOI 10.1242/jcs.045351
   Hendzel MJ, 1997, CHROMOSOMA, V106, P348, DOI 10.1007/s004120050256
   Houston SI, 2008, J BIOL CHEM, V283, P19478, DOI 10.1074/jbc.M710579200
   Janicki SM, 2004, CELL, V116, P683, DOI 10.1016/S0092-8674(04)00171-0
   Janzen CJ, 2006, MOL CELL, V23, P497, DOI 10.1016/j.molcel.2006.06.027
   Jones B, 2008, PLOS GENET, V4, DOI 10.1371/journal.pgen.1000190
   Kim W, 2012, J BIOL CHEM, V287, P5588, DOI 10.1074/jbc.M111.328138
   Lee AJX, 2011, CANCER RES, V71, P1858, DOI 10.1158/0008-5472.CAN-10-3604
   McManus KJ, 2006, PLOS COMPUT BIOL, V2, P1271, DOI 10.1371/journal.pcbi.0020139
   McManus KJ, 2009, P NATL ACAD SCI USA, V106, P3276, DOI 10.1073/pnas.0813414106
   McManus KJ, 2006, J BIOL CHEM, V281, P8888, DOI 10.1074/jbc.M505323200
   McManus KJ, 2005, MOL BIOL CELL, V16, P5013, DOI 10.1091/mbc.E05-01-0065
   McManus KJ, 2005, METHODS, V36, P351, DOI 10.1016/j.ymeth.2005.03.010
   McManus KJ, 2003, MOL CELL BIOL, V23, P7611, DOI 10.1128/MCB.23.21.7611-7627.2003
   Michor F, 2005, SEMIN CANCER BIOL, V15, P484, DOI 10.1016/j.semcancer.2005.06.005
   Nakamura H, 2003, CLIN CANCER RES, V9, P2294
   Ng HH, 2002, J BIOL CHEM, V277, P34655, DOI 10.1074/jbc.C200433200
   Peters AHFM, 2001, CELL, V107, P323, DOI 10.1016/S0092-8674(01)00542-6
   Rui HT, 2004, BIOL REPROD, V70, P1843, DOI 10.1095/biolreprod.103.026070
   Sajesh BV, 2013, GENETICS, V195, P757, DOI 10.1534/genetics.113.156836
   Schulze JM, 2009, MOL CELL, V35, P626, DOI 10.1016/j.molcel.2009.07.017
   Shema E, 2008, GENE DEV, V22, P2664, DOI 10.1101/gad.1703008
   Sun ZW, 2002, NATURE, V418, P104, DOI 10.1038/nature00883
   TAYLOR JH, 1960, ANN NY ACAD SCI, V90, P409, DOI 10.1111/j.1749-6632.1960.tb23259.x
   Thompson LL, 2013, CANCER METAST REV, V32, P363, DOI 10.1007/s10555-013-9434-8
   van Pel DM, 2013, PLOS GENET, V9, DOI 10.1371/journal.pgen.1003254
   Walther A, 2008, GUT, V57, P941, DOI 10.1136/gut.2007.135004
   Wei Y, 1999, CELL, V97, P99, DOI 10.1016/S0092-8674(00)80718-7
   WU RS, 1981, J BIOL CHEM, V256, P5916
   Yu WY, 2012, NAT COMMUN, V3, DOI 10.1038/ncomms2304
NR 44
TC 22
Z9 23
U1 0
U2 12
PU GENETICS SOCIETY AMERICA
PI BETHESDA
PA 9650 ROCKVILLE AVE, BETHESDA, MD 20814 USA
SN 0016-6731
EI 1943-2631
J9 GENETICS
JI Genetics
PD FEB
PY 2015
VL 199
IS 2
BP 423
EP 433
DI 10.1534/genetics.114.172874
PG 11
WC Genetics & Heredity
WE Science Citation Index Expanded (SCI-EXPANDED)
SC Genetics & Heredity
GA CB2LQ
UT WOS:000349459400011
PM 25533199
OA Green Published
DA 2022-04-10
ER

PT J
AU De Clerck, L
   Willems, S
   Noberini, R
   Restellini, C
   Van Puyvelde, B
   Daled, S
   Bonaldi, T
   Deforce, D
   Dhaenens, M
AF De Clerck, Laura
   Willems, Sander
   Noberini, Roberta
   Restellini, Camilla
   Van Puyvelde, Bart
   Daled, Simon
   Bonaldi, Tiziana
   Deforce, Dieter
   Dhaenens, Maarten
TI hSWATH: Unlocking SWATH's Full Potential for an Untargeted Histone
   Perspective
SO JOURNAL OF PROTEOME RESEARCH
LA English
DT Article
DE sequential window acquisition of all theoretical fragment ion spectra
   (SWATH); data-independent acquisition (DIA); histone; mass spectrometry
   (MS); post-translational modification; epigenetic
ID post-translational modification; QUANTIFICATION; PROTEOMICS; CODE;
   PROPIONYLATION; WINDOW
AB Mass spectrometry (MS) has become the technique of choice for large-scale analysis of histone post-translational modification (hPTMs) and their combinatorial patterns, especially in untargeted settings where novel discovery-driven hypotheses are being generated. However, MS-based histone analysis requires a distinct sample preparation, acquisition, and data analysis workflow when compared to traditional MS-based approaches. To this end, sequential window acquisition of all theoretical fragment ion spectra (SWATH) has great potential, as it allows for untargeted accurate identification and quantification of hPTMs. Here, we present a complete SWATH workflow specifically adapted for the untargeted study of histones (hSWATH). We assess its validity on a technical dataset of time-lapse deacetylation of a commercial histone extract using HDAC1, which contains a ground truth, i.e., acetylated substrate peptide reduce in intensity. We successfully apply this workflow in a biological setting and subsequently investigate the differential response to HDAC inhibition in different breast cancer cell lines.
C1 [De Clerck, Laura; Willems, Sander; Van Puyvelde, Bart; Daled, Simon; Deforce, Dieter; Dhaenens, Maarten] Univ Ghent, Lab Pharmaceut Biotechnol, ProGenT, B-9000 Ghent, Belgium.
   [Noberini, Roberta; Restellini, Camilla; Bonaldi, Tiziana] European Inst Oncol IRCCS, Dept Expt Oncol, IEO, I-20141 Milan, Italy.
RP Dhaenens, M (corresponding author), Univ Ghent, Lab Pharmaceut Biotechnol, ProGenT, B-9000 Ghent, Belgium.
EM maarten.dhaenens@ugent.be
RI Dhaenens, Maarten/AAE-5694-2020; Willems, Sander/M-4949-2019; Noberini,
   Roberta/AAP-4527-2020; Deforce, Dieter LD/J-4725-2013; Bonaldi,
   Tiziana/K-5075-2016
OI Dhaenens, Maarten/0000-0002-9801-3509; Willems,
   Sander/0000-0002-7124-610X; Deforce, Dieter LD/0000-0002-0635-661X;
   Bonaldi, Tiziana/0000-0003-3556-1265; Daled, Simon/0000-0001-8129-2217;
   De Clerck, Laura/0000-0001-9465-4387; Van Puyvelde,
   Bart/0000-0002-7368-1762; Noberini, Roberta/0000-0002-7267-1079
FU Flanders Agency Entrepreneurship and Innovation (VLAIO) [SB-141209];
   Fund of Scientific Research Flanders (FWO) [G013916N]; FWO [12E9716N,
   11B4518N]; Epigen Flagship project (CNR); Italian Association for Cancer
   ResearchFondazione AIRC per la ricerca sul cancro [15741]; Italian
   Ministry of HealthMinistry of Health, Italy [GR-2016-02361522];
   Fondazione Umberto VeronesiFondazione Umberto Veronesi
FX This research was mainly funded by a Ph.D. grant from the Flanders
   Agency Entrepreneurship and Innovation (VLAIO), awarded to L.D.C.
   (SB-141209). Partial funding was received through a grant from the Fund
   of Scientific Research Flanders (FWO, G013916N) and FWO mandates
   12E9716N and 11B4518N awarded to M.D. and B.V.P., respectively. Research
   in the TB group was supported by grant from the Epigen Flagship project
   (CNR) and the Italian Association for Cancer Research (grant no. 15741).
   RN. is supported by the Italian Ministry of Health
   (grant#GR-2016-02361522) and Fondazione Umberto Veronesi. The authors
   are grateful to Sofie Vande Casteele for her excellent technical
   assistance and to Alessandro Cuomo for useful discussion. The authors
   also would like to thank the Skyline team for implementing the
   much-needed features to do the analysis of histone data. The MS data and
   Skyline documents have been deposited to the ProteomeXchange
   Consortium<SUP>38</SUP> via the PRIDE<SUP>39</SUP> partner repository
   with the dataset identifier PXDOI 1198.
CR Alhamwe BA, 2018, ALLERGY ASTHMA CL IM, V14, DOI 10.1186/s13223-018-0259-4
   Allis CD, 2007, CELL, V131, P633, DOI 10.1016/j.cell.2007.10.039
   Berson A, 2018, TRENDS NEUROSCI, V41, P587, DOI 10.1016/j.tins.2018.05.005
   Britton LMP, 2011, EXPERT REV PROTEOMIC, V8, P631, DOI [10.1586/EPR.11.47, 10.1586/epr.11.47]
   Celona B, 2011, PLOS BIOL, V9, DOI 10.1371/journal.pbio.1001086
   El Kennani S, 2018, PROTEOMES, V6, DOI 10.3390/proteomes6030029
   Escher C, 2012, PROTEOMICS, V12, P1111, DOI 10.1002/pmic.201100463
   Garcia BA, 2007, NAT PROTOC, V2, P933, DOI 10.1038/nprot.2007.106
   Gillet LC, 2012, MOL CELL PROTEOMICS, V11, DOI 10.1074/mcp.O111.016717
   GOOD IJ, 1987, ANN STAT, V15, P694, DOI 10.1214/aos/1176350369
   Govaert E, 2016, PROTEOMICS, V16, P2937, DOI 10.1002/pmic.201600341
   Huang H, 2015, CHEM REV, V115, P2376, DOI 10.1021/cr500491u
   Huang H, 2014, CELL, V159, P458, DOI 10.1016/j.cell.2014.09.037
   Janssen KA, 2017, METHOD ENZYMOL, V586, P359, DOI 10.1016/bs.mie.2016.10.021
   Jarnuczak Andrew F, 2017, Curr Protoc Bioinformatics, V59, DOI 10.1002/cpbi.30
   Jenuwein T, 2001, SCIENCE, V293, P1074, DOI 10.1126/science.1063127
   Karmodiya K, 2012, BMC GENOMICS, V13, DOI 10.1186/1471-2164-13-424
   Keller A, 2016, MOL CELL PROTEOMICS, V15, P1151, DOI 10.1074/mcp.M115.054478
   Kouzarides T, 2007, CELL, V128, P693, DOI 10.1016/j.cell.2007.02.005
   LeRoy G, 2013, EPIGENET CHROMATIN, V6, DOI 10.1186/1756-8935-6-20
   Lin S, 2014, MOL CELL PROTEOMICS, V13, P2450, DOI 10.1074/mcp.O113.036459
   Ludwig C, 2018, MOL SYST BIOL, V14, DOI 10.15252/msb.20178126
   MacLean B, 2010, BIOINFORMATICS, V26, P966, DOI 10.1093/bioinformatics/btq054
   Meert P, 2016, PROTEOMICS, V16, P1970, DOI 10.1002/pmic.201600045
   Meert P, 2015, PROTEOMICS, V15, P2966, DOI 10.1002/pmic.201400569
   Navarro P, 2016, NAT BIOTECHNOL, V34, P1130, DOI 10.1038/nbt.3685
   Noberini R, 2018, NUCLEIC ACIDS RES, V46, P3817, DOI 10.1093/nar/gky224
   Reiter L, 2011, NAT METHODS, V8, P430, DOI [10.1038/NMETH.1584, 10.1038/nmeth.1584]
   Rosenberger G, 2017, NAT BIOTECHNOL, V35, P781, DOI 10.1038/nbt.3908
   Rosenberger G, 2014, SCI DATA, V1, DOI 10.1038/sdata.2014.31
   Schubert OT, 2015, NAT PROTOC, V10, DOI 10.1038/nprot.2015.015
   Searle BC, 2018, NAT COMMUN, V9, DOI 10.1038/s41467-018-07454-w
   Shechter D, 2007, NAT PROTOC, V2, P1445, DOI 10.1038/nprot.2007.202
   Sidoli S, 2017, METHODS MOL BIOL, V1528, P121, DOI 10.1007/978-1-4939-6630-1_8
   Sidoli S, 2015, MOL CELL PROTEOMICS, V14, P2420, DOI 10.1074/mcp.O114.046102
   Sidoli S, 2012, J PROTEOMICS, V75, P3419, DOI 10.1016/j.jprot.2011.12.029
   Sowers JL, 2015, ANAL CHEM, V87, P10006, DOI 10.1021/acs.analchem.5b02615
   Tang H, 2014, ANAL CHEM, V86, P5526, DOI 10.1021/ac500972x
   Tessarz P, 2014, NAT REV MOL CELL BIO, V15, P703, DOI 10.1038/nrm3890
   Vizcaino JA, 2014, NAT BIOTECHNOL, V32, P223, DOI 10.1038/nbt.2839
   Willems S, 2017, J PROTEOME RES, V16, P655, DOI 10.1021/acs.jproteome.6b00724
   Young NL, 2010, CELL MOL LIFE SCI, V67, P3983, DOI 10.1007/s00018-010-0475-7
   Zhang Y, 2015, J PROTEOME RES, V14, P4359, DOI 10.1021/acs.jproteome.5b00543
NR 43
TC 6
Z9 7
U1 0
U2 5
PU AMER CHEMICAL SOC
PI WASHINGTON
PA 1155 16TH ST, NW, WASHINGTON, DC 20036 USA
SN 1535-3893
EI 1535-3907
J9 J PROTEOME RES
JI J. Proteome Res.
PD NOV
PY 2019
VL 18
IS 11
BP 3840
EP 3849
DI 10.1021/acs.jproteome.9b00214
PG 10
WC Biochemical Research Methods
WE Science Citation Index Expanded (SCI-EXPANDED)
SC Biochemistry & Molecular Biology
GA JK0SD
UT WOS:000494558900004
PM 31429292
DA 2022-04-10
ER

PT J
AU Altucci, L
   Clarke, N
   Nebbioso, A
   Scognamiglio, A
   Gronemeyer, H
AF Altucci, L
   Clarke, N
   Nebbioso, A
   Scognamiglio, A
   Gronemeyer, H
TI Acute myeloid leukemia: Therapeutic impact of epigenetic drugs
SO INTERNATIONAL JOURNAL OF BIOCHEMISTRY & CELL BIOLOGY
LA English
DT Article
DE leukemia; epigenetic; therapy; deacetylases inhibitor
ID ACUTE PROMYELOCYTIC LEUKEMIA; ONCOGENIC TRANSCRIPTION FACTOR; DEATH
   LIGAND TRAIL; DNA METHYLTRANSFERASE; HISTONE DEACETYLASES; TUMOR
   SUPPRESSION; CANCER-THERAPY; CELLS; inhibitor; BINDING
AB Acute myeloid leukemia (AML) is not a single disease but a group of malignancies in which the clonal expansion of various types of hematopoietic precursor cells in the bone marrow leads to perturbation of the delicate balance between self-renewal and differentiation that is characteristic of normal hematopoiesis. An increasing number of genetic aberrations, such as chromosomal translocations that alter the function of transcription regulatory factors, has been identified as the cause of AML and shown to act by deregulating gene programming at both the genetic and epigenetic level. While the genetic aberrations occurring in acute myeloid leukemia are fairly well understood, we have only recently become aware of the epigenetic deregulation associated with leukemia, in particular with myeloid leukemias. The deposition of epigenetic "marks" on chromatin-post-translational modification of nucleosomal proteins and methylation of particular DNA, sequences-is accomplished by enzymes, which are often embedded in multi-subunit "machineries" that have acquired aberrant functionalities during leukemogenesis. These enzymes are target for so-called "epi-drugs". Indeed, recent results indicate that epi-drugs may constitute an entirely novel type of anti-cancer drugs with unanticipated potential. Proof-of-principle comes from studies with histone deacetylase inhibitor, promising novel anti-cancer drugs. In this review we focus on the epigenefic mechanism associated with acute myeloid leukemogenesis and discuss the therapeutic potential of epigenetic modulators such as histone deacetylase and DNA methyltransferase inhibitor. (C) 2005 Elsevier Ltd. All rights reserved.
C1 Univ Naples 2, Dipartimento Patol Gen, I-80138 Naples, Italy.
   CEINGE Biotecnol Avanzate, Ctr Oncogenom AIRC, Naples, Italy.
   IGBMC, Dept Cell Biol & Signal Transduct, F-67404 Illkirch Graffenstaden, France.
RP Altucci, L (corresponding author), Univ Naples 2, Dipartimento Patol Gen, Vico L De Crecchio 7, I-80138 Naples, Italy.
EM lucia.altucci@unina2.it; hg@igbmc.u-strasbg.fr
RI Altucci, Lucia/S-8031-2019; Gronemeyer, Hinrich/H-7002-2016; Gronemeyer,
   Hinrich/AAH-5575-2019; Gronemeyer, Hinrich/G-6240-2011; NEBBIOSO,
   Angela/C-3566-2016
OI Gronemeyer, Hinrich/0000-0001-9454-2449; Gronemeyer,
   Hinrich/0000-0001-9454-2449; Gronemeyer, Hinrich/0000-0001-9454-2449;
   Clarke, Nicole/0000-0002-2770-3289; altucci, lucia/0000-0002-7312-5387;
   NEBBIOSO, Angela/0000-0001-5374-3527
CR Alcalay M, 2001, ONCOGENE, V20, P5680, DOI 10.1038/sj.onc.1204642
   Altucci L, 2001, NAT REV CANCER, V1, P181, DOI 10.1038/35106036
   Altucci L, 2001, NAT MED, V7, P680, DOI 10.1038/89050
   Altucci L, 2004, VITAM HORM, V67, P319
   Amann JM, 2001, MOL CELL BIOL, V21, P6470, DOI 10.1128/MCB.21.19.6470-6483.2001
   Ayton PM, 2004, MOL CELL BIOL, V24, P10470, DOI 10.1128/MCB.24.23.10470-10478.2004
   Benoit G, 1999, EMBO J, V18, P7011, DOI 10.1093/emboj/18.24.7011
   Borrow J, 1996, NAT GENET, V14, P33, DOI 10.1038/ng0996-33
   Brueckner B, 2004, TRENDS PHARMACOL SCI, V25, P551, DOI 10.1016/j.tips.2004.09.004
   Chaffanet M, 2000, GENE CHROMOSOME CANC, V28, P138, DOI 10.1002/(SICI)1098-2264(200006)28:2<138::AID-GCC2>3.0.CO;2-2
   Clarke N, 2004, EMBO J, V23, P3051, DOI 10.1038/sj.emboj.7600302
   Deguchi K, 2003, CANCER CELL, V3, P259, DOI 10.1016/S1535-6108(03)00051-5
   Di Croce L, 2002, SCIENCE, V295, P1079, DOI 10.1126/science.1065173
   Eden A, 2003, SCIENCE, V300, P455, DOI 10.1126/science.1083557
   Egger G, 2004, NATURE, V429, P457, DOI 10.1038/nature02625
   Esteller M, 2005, CURR OPIN ONCOL, V17, P55, DOI 10.1097/01.cco.0000147383.04709.10
   Fang MZ, 2003, CANCER RES, V63, P7563
   Feinberg AP, 2004, NAT REV CANCER, V4, P143, DOI 10.1038/nrc1279
   Ferrara FF, 2001, CANCER RES, V61, P2
   Gaudet F, 2003, SCIENCE, V300, P489, DOI 10.1126/science.1083558
   Gilliland DG, 2002, SEMIN HEMATOL, V39, P6, DOI 10.1053/shem.2002.36921
   Guillemin MC, 2002, J EXP MED, V196, P1373, DOI 10.1084/jem.20021129
   Guo F, 2004, CANCER RES, V64, P2580, DOI 10.1158/0008-5472.CAN-03-2629
   Huntly BJP, 2004, CANCER CELL, V6, P587, DOI 10.1016/j.ccr.2004.10.015
   Ida K, 1997, BLOOD, V90, P4699, DOI 10.1182/blood.V90.12.4699.4699_4699_4704
   Insinga A, 2004, EMBO J, V23, P1144, DOI 10.1038/sj.emboj.7600109
   Insinga A, 2005, NAT MED, V11, P71, DOI 10.1038/nm1160
   Issa JPJ, 2004, BLOOD, V103, P1635, DOI 10.1182/blood-2003-03-0687
   Kleer CG, 2003, P NATL ACAD SCI USA, V100, P11606, DOI 10.1073/pnas.1933744100
   Kung AL, 2000, GENE DEV, V14, P272
   Kurdistani SK, 2004, CELL, V117, P721, DOI 10.1016/j.cell.2004.05.023
   Laird PW, 2003, NAT REV CANCER, V3, P253, DOI 10.1038/nrc1045
   Lin HK, 2004, NATURE, V431, P205, DOI 10.1038/nature02783
   Lin RJ, 1998, NATURE, V391, P811, DOI 10.1038/35895
   LITWACK G, 2004, VITAM HORM, P448
   Mai A, 2003, J MED CHEM, V46, P4826, DOI 10.1021/jm034167p
   Marks PA, 2004, ADV CANCER RES, V91, P137, DOI 10.1016/S0065-230X(04)91004-4
   Milne TA, 2002, MOL CELL, V10, P1107, DOI 10.1016/S1097-2765(02)00741-4
   Nakamura T, 2002, MOL CELL, V10, P1119, DOI 10.1016/S1097-2765(02)00740-2
   Nebbioso A, 2005, NAT MED, V11, P77, DOI 10.1038/nm1161
   PETRIJ F, 1995, NATURE, V376, P348, DOI 10.1038/376348a0
   Pina IC, 2003, J ORG CHEM, V68, P3866, DOI 10.1021/jo034248t
   Rego EM, 2002, TRENDS MOL MED, V8, P396, DOI 10.1016/S1471-4914(02)02384-5
   Salomoni P, 2002, CELL, V108, P165, DOI 10.1016/S0092-8674(02)00626-8
   Silverman LR, 2002, J CLIN ONCOL, V20, P2429, DOI 10.1200/JCO.2002.04.117
   Somech R, 2004, CANCER TREAT REV, V30, P461, DOI 10.1016/j.ctrv.2004.04.006
   Strahl BD, 2000, NATURE, V403, P41, DOI 10.1038/47412
   Varambally S, 2002, NATURE, V419, P624, DOI 10.1038/nature01075
   Villa R, 2004, BIOCHEM PHARMACOL, V68, P1247, DOI 10.1016/j.bcp.2004.05.041
   Villar-Garea A, 2003, CANCER RES, V63, P4984
   Voegel JJ, 1998, EMBO J, V17, P507, DOI 10.1093/emboj/17.2.507
   Yang AS, 2003, SCIENCE, V302
   Zhu J, 2005, CANCER CELL, V7, P143, DOI 10.1016/j.ccr.2005.01.005
NR 53
TC 35
Z9 37
U1 0
U2 5
PU PERGAMON-ELSEVIER SCIENCE LTD
PI OXFORD
PA THE BOULEVARD, LANGFORD LANE, KIDLINGTON, OXFORD OX5 1GB, ENGLAND
SN 1357-2725
EI 1878-5875
J9 INT J BIOCHEM CELL B
JI Int. J. Biochem. Cell Biol.
PD SEP
PY 2005
VL 37
IS 9
BP 1752
EP 1762
DI 10.1016/j.biocel.2005.04.019
PG 11
WC Biochemistry & Molecular Biology; Cell Biology
WE Science Citation Index Expanded (SCI-EXPANDED)
SC Biochemistry & Molecular Biology; Cell Biology
GA 953TN
UT WOS:000231103500003
PM 15964234
DA 2022-04-10
ER

PT J
AU Kim, JH
   Yoon, EK
   Chung, HJ
   Park, SY
   Hong, KM
   Lee, CH
   Lee, YS
   Choi, K
   Yang, Y
   Kim, K
   Kim, IH
AF Kim, Jae Hyeong
   Yoon, Eun-Kyung
   Chung, Hye-Jin
   Park, Seong-Yeol
   Hong, Kyeong-Man
   Lee, Chang-Hun
   Lee, Yeon-Su
   Choi, Kyungho
   Yang, Young
   Kim, Kyungtae
   Kim, In-Hoo
TI p53 acetylation enhances Taxol-induced apoptosis in human cancer cells
SO APOPTOSIS
LA English
DT Article
DE Taxol; p53; Apoptosis; Acetylation; Sirt1; HDAC inhibitor
ID HISTONE DEACETYLASE; MITOTIC ARREST; DNA-BINDING; PACLITAXEL;
   PHOSPHORYLATION; ACTIVATION; INHIBITOR; SENSITIVITY; MODULATION;
   CHECKPOINT
AB Microtubule inhibitor (MTIs) such as Taxol have been used for treating various malignant tumors. Although MTIs have been known to induce cell death through mitotic arrest, other mechanism can operate in MTI-induced cell death. Especially, the role of p53 in this process has been controversial for a long time. Here we investigated the function of p53 in Taxol-induced apoptosis using p53 wild type and p53 null cancer cell lines. p53 was upregulated upon Taxol treatment in p53 wild type cells and deletion of p53 diminished Taxol-induced apoptosis. p53 target proteins including MDM2, p21, BAX, and beta-isoform of PUMA were also upregulated by Taxol in p53 wild type cells. Conversely, when the wild type p53 was re-introduced into two different p53 null cancer cell lines, Taxol-induced apoptosis was enhanced. Among post-translational modification that affect p53 stability and function, p53 acetylation, rather than phosphorylation, increased significantly in Taxol-treated cells. When acetylation was enhanced by anti-Sirt1 siRNA or an HDAC inhibitor, Taxol-induced apoptosis was enhanced, which was not observed in p53 null cells. When an acetylation-defective mutant of p53 was re-introduced to p53 null cells, apoptosis was partially reduced compared to the re-introduction of the wild type p53. Thus, p53 plays a pro-apoptotic role in Taxol-induced apoptosis and acetylation of p53 contributes to this pro-apoptotic function in response to Taxol in several human cancer cell lines, suggesting that enhancing acetylation of p53 could have potential implication for increasing the sensitivity of cancer cells to Taxol.
C1 [Kim, Jae Hyeong; Yoon, Eun-Kyung; Chung, Hye-Jin; Park, Seong-Yeol; Hong, Kyeong-Man; Lee, Chang-Hun; Lee, Yeon-Su; Choi, Kyungho; Kim, Kyungtae; Kim, In-Hoo] Natl Canc Ctr, Res Inst, Gyeonggi Do 410769, Goyang Si, South Korea.
   [Kim, Jae Hyeong; Yang, Young] Sookmyung Womans Univ, Dept Life Sci, Res Ctr Womans Dis, Seoul 140742, South Korea.
   [Yoon, Eun-Kyung] Ewha Womans Univ, Div Life & Phamaceut Sci, Grad Sch, Seoul 120750, South Korea.
RP Kim, K (corresponding author), Natl Canc Ctr, Res Inst, 323 Ilsan Ro, Gyeonggi Do 410769, Goyang Si, South Korea.
EM bioktkim@ncc.re.kr
RI Choi, Kyungho/J-5685-2012
OI Choi, Kyungho/0000-0003-1635-173X; Kim, Jae Hyeong/0000-0003-4675-5305
FU National Cancer Center Korea [NCC-1110080]
FX We would like to thank Dr. Ja-Eun Kim (Kyunghee University, Seoul,
   Korea) for kindly sharing her anti-Sirt1 antibody, Dr. Xuan Liu
   (University of California, Riverside, USA) for providing a mutant p53
   plasmid, and Tae Sik Kim for technical support on flow cytometry. We
   would like to give special thanks to Dr. Sun-Shin Kim, and Dr. Hye-Jin
   Yu for scientific discussion and Dr. J.S. Ram for critical reading
   during the manuscript preparation. This work was supported by grants for
   K. K. from National Cancer Center Korea (NCC-1110080).
CR Beckers T, 2007, INT J CANCER, V121, P1138, DOI 10.1002/ijc.22751
   Blagosklonny MV, 1999, INT J CANCER, V83, P151, DOI 10.1002/(SICI)1097-0215(19991008)83:2<151::AID-IJC1>3.0.CO;2-5
   Bunz F, 1998, SCIENCE, V282, P1497, DOI 10.1126/science.282.5393.1497
   Clarke PR, 2010, CELL CYCLE, V9, P4035, DOI 10.4161/cc.9.20.13522
   Damia G, 2001, NEOPLASIA, V3, P10, DOI 10.1038/sj.neo.7900122
   Delia D, 1996, NAT MED, V2, P724, DOI 10.1038/nm0796-724
   Ferreon JC, 2009, P NATL ACAD SCI USA, V106, P6591, DOI 10.1073/pnas.0811023106
   Ford J, 2005, CANCER RES, V65, P10457, DOI 10.1158/0008-5472.CAN-05-1923
   Giannakakou P, 2002, P NATL ACAD SCI USA, V99, P10855, DOI 10.1073/pnas.132275599
   Gu W, 1997, CELL, V90, P595, DOI 10.1016/S0092-8674(00)80521-8
   Guntur VP, 2010, ANTICANCER RES, V30, P3557
   Harley ME, 2010, EMBO J, V29, P2407, DOI 10.1038/emboj.2010.112
   Ito A, 2002, EMBO J, V21, P6236, DOI 10.1093/emboj/cdf616
   Kops GJPL, 2005, NAT REV CANCER, V5, P773, DOI 10.1038/nrc1714
   Kruse JP, 2009, CELL, V137, P609, DOI 10.1016/j.cell.2009.04.050
   Lanni JS, 1997, P NATL ACAD SCI USA, V94, P9679, DOI 10.1073/pnas.94.18.9679
   Lassen U, 2010, BRIT J CANCER, V103, P12, DOI 10.1038/sj.bjc.6605726
   Liu T, 2009, CANCER RES, V69, P1702, DOI 10.1158/0008-5472.CAN-08-3365
   Loewer A, 2010, CELL, V142, P89, DOI 10.1016/j.cell.2010.05.031
   Lohrum MAE, 2001, MOL CELL BIOL, V21, P8521, DOI 10.1128/MCB.21.24.8521-8532.2001
   Matson DR, 2011, MOL INTERV, V11, P141, DOI 10.1124/mi.11.2.12
   Sackett D L, 1999, Cancer Chemother Biol Response Modif, V18, P59
   Saito A, 1999, P NATL ACAD SCI USA, V96, P4592, DOI 10.1073/pnas.96.8.4592
   Shi XB, 2007, MOL CELL, V27, P636, DOI 10.1016/j.molcel.2007.07.012
   Shu CH, 1997, APOPTOSIS, V2, P463, DOI 10.1023/A:1026422111457
   Stewart ZA, 2001, ONCOGENE, V20, P113, DOI 10.1038/sj.onc.1204060
   Sudo T, 2004, CANCER RES, V64, P2502, DOI 10.1158/0008-5472.CAN-03-2013
   Sykes SM, 2009, J BIOL CHEM, V284, P20197, DOI 10.1074/jbc.M109.026096
   Tang Y, 2008, CELL, V133, P612, DOI 10.1016/j.cell.2008.03.025
   Vaziri H, 2001, CELL, V107, P149, DOI 10.1016/S0092-8674(01)00527-X
   Wahl AF, 1996, NAT MED, V2, P72, DOI 10.1038/nm0196-72
   Wertz IE, 2011, NATURE, V471, P110, DOI 10.1038/nature09779
   WOODS CM, 1995, MOL MED, V1, P506, DOI 10.1007/BF03401588
   Yamaguchi H, 2009, J BIOL CHEM, V284, P11171, DOI 10.1074/jbc.M809268200
   Zuco V, 2011, PLOS ONE, V6, DOI 10.1371/journal.pone.0029085
NR 35
TC 36
Z9 40
U1 0
U2 43
PU SPRINGER
PI DORDRECHT
PA VAN GODEWIJCKSTRAAT 30, 3311 GZ DORDRECHT, NETHERLANDS
SN 1360-8185
J9 APOPTOSIS
JI Apoptosis
PD JAN
PY 2013
VL 18
IS 1
BP 110
EP 120
DI 10.1007/s10495-012-0772-8
PG 11
WC Biochemistry & Molecular Biology; Cell Biology
WE Science Citation Index Expanded (SCI-EXPANDED)
SC Biochemistry & Molecular Biology; Cell Biology
GA 069SB
UT WOS:000313456000009
PM 23161364
DA 2022-04-10
ER

PT J
AU Palczewski, MB
   Kuschman, HP
   Bovee, R
   Hickok, JR
   Thomas, DD
AF Palczewski, Marianne B.
   Kuschman, Hannah Petraitis
   Bovee, Rhea
   Hickok, Jason R.
   Thomas, Douglas D.
TI Vorinostat exhibits anticancer effects in triple-negative breast cancer
   cells by preventing nitric oxide-driven histone deacetylation
SO BIOLOGICAL CHEMISTRY
LA English
DT Article
DE chemotherapy; epigenetic; free radicals; post-translational
   modifications; proliferation
ID gene expression; METHYLATION; INTERPLAY; SYNTHASE; NOS2; INHIBITOR;
   target
AB Triple-negative breast cancers (TNBC) that produce nitric oxide (NO) are more aggressive, and the expression of the inducible form of nitric oxide synthase (NOS2) is a negative prognostic indicator. In these studies, we set out to investigate potential therapeutic strategies to counter the tumor-permissive properties of NO. We found that exposure to NO increased proliferation of TNBC cells and that treatment with the histone deacetylase inhibitor Vorinostat (SAHA) prevented this proliferation. When histone acetylation was measured in response to NO and/ or SAHA, NO significantly decreased acetylation on histone 3 lysine 9 (H3K9ac) and SAHA increased H3K9ac. If NO and SAHA were sequentially administered to cells (in either order), an increase in acetylation was observed in all cases. Mechanistic studies suggest that the "deacetylase" activity of NO does not involve S-nitrosothiols or soluble guanylyl cyclase activation. The observed decrease in histone acetylation by NO required the interaction of NO with cellular iron pools and may be an overriding effect of NO-mediated increases in histone methylation at the same lysine residues. Our data revealed a novel pathway interaction of Vorinostat and provides new insight in therapeutic strategy for aggressive TNBCs.
C1 [Palczewski, Marianne B.; Kuschman, Hannah Petraitis; Thomas, Douglas D.] Univ Illinois, Dept Pharmaceut Sci, 833 S Wood St, Chicago, IL 60607 USA.
   [Bovee, Rhea] DePaul Univ, 1 E Jackson Blvd, Chicago, IL 60604 USA.
   [Hickok, Jason R.] IRBM SpA, IRBM Sci Pk, Via Pontina Km 30-600, I-00071 Pomezia, Italy.
RP Thomas, DD (corresponding author), Univ Illinois, Dept Pharmaceut Sci, 833 S Wood St, Chicago, IL 60607 USA.
EM ddthomas@uic.edu
OI Palczewski, Marianne/0000-0003-4957-2387; Thomas,
   Douglas/0000-0003-1252-0786
FU "bridge funding" from the UICancer Center
FX This research was supported in part by "bridge funding" from the
   UICancer Center.
CR Bubna AK, 2015, INDIAN J DERMATOL, V60, DOI 10.4103/0019-5154.160511
   De Paepe B, 2002, HISTOCHEM CELL BIOL, V117, P13, DOI 10.1007/s00418-001-0356-0
   Dumitrescu RG, 2018, METHODS MOL BIOL, V1856, P19, DOI 10.1007/978-1-4939-8751-1_2
   Garmpis N, 2017, CANCER GENOM PROTEOM, V14, P299, DOI 10.21873/cgp.20041
   Glynn SA, 2010, J CLIN INVEST, V120, P3843, DOI 10.1172/JCI42059
   Griffith DM, 2011, J INORG BIOCHEM, V105, P763, DOI 10.1016/j.jinorgbio.2011.03.003
   Hebbel RP, 2010, BLOOD, V115, P2483, DOI 10.1182/blood-2009-02-204990
   Heinecke JL, 2014, P NATL ACAD SCI USA, V111, P6323, DOI 10.1073/pnas.1401799111
   Hickok JR, 2013, J BIOL CHEM, V288, P16004, DOI 10.1074/jbc.M112.432294
   Hickok JR, 2012, ANTIOXID REDOX SIGN, V17, P962, DOI 10.1089/ars.2012.4543
   Hickok JR, 2011, J BIOL CHEM, V286, P41413, DOI 10.1074/jbc.M111.287052
   Hickok JR, 2011, FREE RADICAL BIO MED, V51, P1558, DOI 10.1016/j.freeradbiomed.2011.06.030
   Hickok JR, 2010, CURR PHARM DESIGN, V16, P381, DOI 10.2174/138161210790232149
   Kroncke KD, 2001, ANTIOXID REDOX SIGN, V3, P565, DOI 10.1089/15230860152542934
   Loibl S, 2005, EUR J CANCER, V41, P265, DOI 10.1016/j.ejca.2004.07.010
   MacArthur PH, 2007, J CHROMATOGR B, V851, P93, DOI 10.1016/j.jchromb.2006.12.012
   Mendes RV, 2001, HISTOPATHOLOGY, V39, P172, DOI 10.1046/j.1365-2559.2001.01189.x
   Munoz-Sanchez J, 2019, J APPL TOXICOL, V39, P556, DOI 10.1002/jat.3749
   Nakayam J, 2001, SCIENCE, V292, P110, DOI 10.1126/science.1060118
   Prueitt RL, 2007, INT J CANCER, V120, P796, DOI 10.1002/ijc.22336
   Rao CV, 2002, CANCER RES, V62, P165
   Ridnour LA, 2012, PLOS ONE, V7, DOI 10.1371/journal.pone.0044081
   Sabari BR, 2017, NAT REV MOL CELL BIO, V18, P90, DOI 10.1038/nrm.2016.140
   Sahni S, 2018, NITRIC OXIDE-BIOL CH, V76, P37, DOI 10.1016/j.niox.2018.03.003
   Shiva S, 2001, P NATL ACAD SCI USA, V98, P7212, DOI 10.1073/pnas.131128898
   Socco S, 2017, PHARMACOL RES, V121, P52, DOI 10.1016/j.phrs.2017.04.011
   Switzer Christopher H, 2012, For Immunopathol Dis Therap, V3, P117
   Switzer CH, 2012, BREAST CANCER RES, V14, DOI 10.1186/bcr3319
   Switzer CH, 2011, TRENDS PHARMACOL SCI, V32, P644, DOI 10.1016/j.tips.2011.07.001
   Thomas DD, 2015, REDOX BIOL, V5, P225, DOI 10.1016/j.redox.2015.05.002
   Thomas DD, 2015, FREE RADICAL BIO MED, V87, P204, DOI 10.1016/j.freeradbiomed.2015.06.002
   Vasudevan D, 2016, NITRIC OXIDE-BIOL CH, V59, P54, DOI 10.1016/j.niox.2016.08.002
   Vasudevan D, 2015, CANCER RES, V75, P5299, DOI 10.1158/0008-5472.CAN-15-1582
   Vasudevan D, 2014, VITAM HORM, V96, P265, DOI 10.1016/B978-0-12-800254-4.00011-8
   Zhang L, 2018, J ENZYM INHIB MED CH, V33, P714, DOI 10.1080/14756366.2017.1417274
   Zhang Y, 2001, GENE DEV, V15, P2343, DOI 10.1101/gad.927301
   Zhao L, 2019, NEOPLASIA, V21, P82, DOI 10.1016/j.neo.2018.11.006
NR 37
TC 3
Z9 3
U1 1
U2 3
PU WALTER DE GRUYTER GMBH
PI BERLIN
PA GENTHINER STRASSE 13, D-10785 BERLIN, GERMANY
SN 1431-6730
EI 1437-4315
J9 BIOL CHEM
JI Biol. Chem.
PD MAR
PY 2021
VL 402
IS 4
BP 501
EP 512
DI 10.1515/hsz-2020-0323
PG 12
WC Biochemistry & Molecular Biology
WE Science Citation Index Expanded (SCI-EXPANDED)
SC Biochemistry & Molecular Biology
GA QW8BP
UT WOS:000628873300008
PM 33938179
DA 2022-04-10
ER

PT J
AU Teodoridis, JM
   Strathdee, G
   Brown, R
AF Teodoridis, JM
   Strathdee, G
   Brown, R
TI Epigenetic silencing mediated by CpG island methylation: potential as a
   therapeutic target and as a biomarkers
SO DRUG RESISTANCE UPDATES
LA English
DT Review
DE methylation; epigenetic; DNMT; histories; CpG-islands
ID HISTONE DEACETYLASE INHIBITOR; TUMOR-SUPPRESSOR GENE; breast cancer
   CELLS; ABERRANT DNA METHYLATION; ACUTE LYMPHOBLASTIC-LEUKEMIA;
   TRANSCRIPTION FACTOR GENES; INVASIVE DUCTAL CARCINOMA; ACUTE
   MYELOID-LEUKEMIA; COMMON HUMAN CANCERS; PROMOTER HYPERMETHYLATION
AB Many genes become transcriptionally silenced during the development of cancer. As well as affecting disease progression, gene silencing has the potential to influence drug resistance and clinical outcome following therapy. In addition to silencing due to gene mutations, covalent epigenetic modifications such as DNA hypermethylation and histone post-translational modification are associated with transcriptional inactivation of many genes and are an important early event during carcinogenesis and tumour development. Aberrant methylation of CpG islands in promoters is associated with transcriptional inactivation of genes involved in all aspects of tumour development. Genes involved in key DNA damage response pathway, such as cell cycle control, apoptosis signalling and DNA repair, can frequently become methylated and epigenetically silenced in tumours. This may lead to differences in intrinsic sensitivity of tumours to chemotherapy, depending on the specific function of the gene inactivated. Furthermore, it is proposed that chemotherapy itself can exert a selective pressure on epigenetically silenced drug sensitivity genes present in subpopulations of cells, leading to acquired chemoresistance. Since the DNA sequence of epigenetically inactivated genes are not mutated but rather subject to reversible modifications via DNA methyltransferases (DNMTs) or histone modification, it is possible to reverse silencing using small molecule inhibitor. Such compounds show anti-tumour activity and can increase the sensitivity of drug resistant preclinical tumour models. Clinical trials of epigenetic therapies are now underway. Epigenetic profiling, using DNA methylation and histone analysis, will provide guidance on optimisation of these therapies with conventional chemotherapy and will help identify patient populations who may particularly benefit from such approaches. (C) 2004 Elsevier Ltd. All rights reserved.
C1 Univ Glasgow, Ctr Oncol & Appl Pharmacol, CRUK Beatson Labs, Glasgow G61 1BD, Lanark, Scotland.
RP Brown, R (corresponding author), Univ Glasgow, Ctr Oncol & Appl Pharmacol, CRUK Beatson Labs, Garscube Estate,Switchback Rd, Glasgow G61 1BD, Lanark, Scotland.
EM r.brown@beatson.gla.ac.uk
OI Brown, Robert/0000-0001-7960-5755
CR Abdollahi A, 2003, J BIOL CHEM, V278, P6041, DOI 10.1074/jbc.M210361200
   Akiyama Y, 2003, MOL CELL BIOL, V23, P8429, DOI 10.1128/MCB.23.23.8429-8439.2003
   Ando T, 2000, LEUKEMIA, V14, P1915, DOI 10.1038/sj.leu.2401914
   Anttila S, 2003, CANCER RES, V63, P8623
   Arnold CN, 2003, INT J CANCER, V106, P66, DOI 10.1002/ijc.11176
   Bachman KE, 1999, CANCER RES, V59, P798
   Bannister AJ, 2001, NATURE, V410, P120, DOI 10.1038/35065138
   Bartolomei MS, 1997, ANNU REV GENET, V31, P493, DOI 10.1146/annurev.genet.31.1.493
   Bianco T, 2000, CARCINOGENESIS, V21, P147, DOI 10.1093/carcin/21.2.147
   Biniszkiewicz D, 2002, MOL CELL BIOL, V22, P2124, DOI 10.1128/MCB.22.7.2124-2135.2002
   Bird AP, 1999, CELL, V99, P451, DOI 10.1016/S0092-8674(00)81532-9
   Brownhill R, 2002, SCI ENG ETHICS, V8, P43, DOI 10.1007/s11948-002-0032-3
   Byun DS, 2003, CANCER RES, V63, P7068
   Cameron EE, 1999, NAT GENET, V21, P103, DOI 10.1038/5047
   Camphausen K, 2004, CANCER RES, V64, P316, DOI 10.1158/0008-5472.CAN-03-2630
   Catley L, 2003, BLOOD, V102, P2615, DOI 10.1182/blood-2003-01-0233
   Chan TF, 2003, INT J ONCOL, V23, P599
   Chen TP, 2003, MOL CELL BIOL, V23, P5594, DOI 10.1128/MCB.23.16.5594-5605.2003
   Corn PG, 1999, CANCER RES, V59, P3352
   Costa FF, 2004, ONCOGENE, V23, P1481, DOI 10.1038/sj.onc.1207263
   Costello JF, 2000, NAT GENET, V24, P132, DOI 10.1038/72785
   Cote S, 1998, ANTI-CANCER DRUG, V9, P743
   Dallol A, 2003, ONCOGENE, V22, P4611, DOI 10.1038/sj.onc.1206687
   Dammann R, 2000, NAT GENET, V25, P315, DOI 10.1038/77083
   De Smet C, 2004, MOL CELL BIOL, V24, P4781, DOI 10.1128/MCB.24.11.4781-4790.2004
   Domann FE, 2000, INT J CANCER, V85, P805, DOI 10.1002/(SICI)1097-0215(20000315)85:6<805::AID-IJC12>3.0.CO;2-5
   Donadelli M, 2003, MOL CARCINOGEN, V38, P59, DOI 10.1002/mc.10145
   Duckett DR, 1999, P NATL ACAD SCI USA, V96, P12384, DOI 10.1073/pnas.96.22.12384
   Eden A, 2003, SCIENCE, V300, P455, DOI 10.1126/science.1083557
   Efferth T, 2001, BLOOD CELL MOL DIS, V27, P637, DOI 10.1006/bcmd.2001.0427
   ELLERHORST JA, 1993, BRIT J CANCER, V67, P209, DOI 10.1038/bjc.1993.41
   Esteller M, 1999, CANCER RES, V59, P67
   Esteller M, 1999, CANCER RES, V59, P793
   Esteller M, 2002, J PATHOL, V196, P1, DOI 10.1002/path.1024
   Esteller M, 2002, J NATL CANCER I, V94, P26
   Evron E, 2001, CANCER RES, V61, P2782
   Fischle W, 2003, CURR OPIN CELL BIOL, V15, P172, DOI 10.1016/S0955-0674(03)00013-9
   Fournel M, 2002, CANCER RES, V62, P4325
   FROST P, 1990, CANCER RES, V50, P4572
   Fu WN, 2003, ONCOGENE, V22, P451, DOI 10.1038/sj.onc.1206147
   Fulda S, 2003, DRUG RESIST UPDATE, V6, P1, DOI 10.1016/S1368-7646(02)00140-1
   Fulda S, 2001, ONCOGENE, V20, P5865, DOI 10.1038/sj.onc.1204750
   Futscher BW, 2002, NAT GENET, V31, P175, DOI 10.1038/ng886
   Gaudet F, 2003, SCIENCE, V300, P489, DOI 10.1126/science.1083558
   Gerson SL, 2004, NAT REV CANCER, V4, P296, DOI 10.1038/nrc1319
   Gifford G, 2004, CLIN CANCER RES, V10, P4420, DOI 10.1158/1078-0432.CCR-03-0732
   Goffin J, 2002, ANN ONCOL, V13, P1699, DOI 10.1093/annonc/mdf314
   GRAFF JR, 1995, CANCER RES, V55, P5195
   Gray SG, 2001, EXP CELL RES, V262, P75, DOI 10.1006/excr.2000.5080
   Gui CY, 2004, P NATL ACAD SCI USA, V101, P1241, DOI 10.1073/pnas.0307708100
   Hanahan D, 2000, CELL, V100, P57, DOI 10.1016/S0092-8674(00)81683-9
   He B, 2003, P NATL ACAD SCI USA, V100, P14133, DOI 10.1073/pnas.2232790100
   Heard E, 1997, ANNU REV GENET, V31, P571, DOI 10.1146/annurev.genet.31.1.571
   Hegi ME, 2004, CLIN CANCER RES, V10, P1871, DOI 10.1158/1078-0432.CCR-03-0384
   Henderson C, 2003, DRUG RESIST UPDATE, V6, P247, DOI 10.1016/S1368-7646(03)00067-0
   Herman JG, 1996, CANCER RES, V56, P722
   HERMAN JG, 1994, P NATL ACAD SCI USA, V91, P9700, DOI 10.1073/pnas.91.21.9700
   HERMAN JG, 1995, CANCER RES, V55, P4525
   Hopkins-Donaldson S, 2003, CELL DEATH DIFFER, V10, P356, DOI 10.1038/sj.cdd.4401157
   Iacopetta BJ, 1997, ANTICANCER RES, V17, P429
   Imanishi R, 2002, J CLIN ENDOCR METAB, V87, P4821, DOI 10.1210/jc.2002-020877
   Issa Jean-Pierre, 2003, Current Opinion in Oncology, V15, P446, DOI 10.1097/00001622-200311000-00007
   Issa JPJ, 2004, BLOOD, V103, P1635, DOI 10.1182/blood-2003-03-0687
   Iwase H, 1999, BRIT J CANCER, V80, P1982, DOI 10.1038/sj.bjc.6690631
   Jang ER, 2004, ONCOGENE, V23, P1724, DOI 10.1038/sj.onc.1207315
   Johnson PJ, 2002, CLIN CHEM, V48, P1186
   Kane MF, 1997, CANCER RES, V57, P808
   Kang JH, 2001, LAB INVEST, V81, P573, DOI 10.1038/labinvest.3780266
   Kantharidis P, 1997, CLIN CANCER RES, V3, P2025
   Karran P, 1996, CANCER SURV, V28, P69
   Keen JC, 2003, BREAST CANCER RES TR, V81, P177, DOI 10.1023/A:1026146524737
   Kim JS, 2004, BRIT J HAEMATOL, V124, P166, DOI 10.1046/j.1365-2141.2003.04759.x
   Kim SH, 2004, BIOCHEM BIOPH RES CO, V315, P964, DOI 10.1016/j.bbrc.2004.01.149
   Kissil JL, 1997, ONCOGENE, V15, P403, DOI 10.1038/sj.onc.1201172
   Kobayashi H, 2004, INT J CANCER, V109, P207, DOI 10.1002/ijc.11697
   Kominsky SL, 2003, ONCOGENE, V22, P2021, DOI 10.1038/sj.onc.1206199
   Lachner M, 2001, NATURE, V410, P116, DOI 10.1038/35065132
   Lachner M, 2003, J CELL SCI, V116, P2117, DOI 10.1242/jcs.00493
   LAIRD PW, 1995, CELL, V81, P197, DOI 10.1016/0092-8674(95)90329-1
   LEE WH, 1994, P NATL ACAD SCI USA, V91, P11733, DOI 10.1073/pnas.91.24.11733
   LI E, 1993, NATURE, V366, P362, DOI 10.1038/366362a0
   Li Q, 1999, ONCOGENE, V18, P3284, DOI 10.1038/sj.onc.1202663
   Li XR, 2004, ONCOGENE, V23, P1474, DOI 10.1038/sj.onc.1207249
   Li YH, 2002, BLOOD, V100, P2572, DOI 10.1182/blood-2001-11-0026
   Liu K, 2003, MOL CELL BIOL, V23, P2709, DOI 10.1128/MCB.23.8.2709-2719.2003
   Liu LT, 2003, CANCER RES, V63, P3069
   Lyons John, 2003, Curr Opin Investig Drugs, V4, P1442
   Marks PA, 2001, CURR OPIN ONCOL, V13, P477, DOI 10.1097/00001622-200111000-00010
   MARKS PA, 2000, JNCI-J NATL CANCER I, V13, P477
   Marsit CJ, 2004, ONCOGENE, V23, P1000, DOI 10.1038/sj.onc.1207256
   Mattern J, 1998, INT J CANCER, V77, P919, DOI 10.1002/(SICI)1097-0215(19980911)77:6<919::AID-IJC20>3.0.CO;2-V
   Mielnicki LM, 1999, EXP CELL RES, V249, P161, DOI 10.1006/excr.1999.4461
   MOMPARLER RL, 1990, CANCER LETT, V54, P21, DOI 10.1016/0304-3835(90)90086-D
   Moreland NJ, 1999, CANCER RES, V59, P2102
   Nakatsuka SI, 2003, INT J ONCOL, V22, P561
   Neuzil H, 2004, BIOCHEM BIOPH RES CO, V314, P186, DOI 10.1016/j.bbrc.2003.12.074
   OHTANIFUJITA N, 1993, ONCOGENE, V8, P1063
   Oka T, 2002, CANCER RES, V62, P6390
   Olopade OI, 2003, CANCER CELL, V3, P417, DOI 10.1016/S1535-6108(03)00111-9
   Palmisano WA, 2003, CANCER RES, V63, P4620
   Papouli E, 2004, CANCER RES, V64, P3391, DOI 10.1158/0008-5472.CAN-04-0513
   Pinto M, 2003, J PATHOL, V200, P32, DOI 10.1002/path.1327
   Plumb JA, 2000, CANCER RES, V60, P6039
   Pommier Y, 2004, ONCOGENE, V23, P2934, DOI 10.1038/sj.onc.1207515
   Primeau M, 2003, INT J CANCER, V103, P177, DOI 10.1002/ijc.10789
   Qian XLC, 1997, CANCER RES, V57, P3672
   Rhee I, 2002, NATURE, V416, P552, DOI 10.1038/416552a
   Richon VM, 2000, P NATL ACAD SCI USA, V97, P10014, DOI 10.1073/pnas.180316197
   Robertson KD, 1998, MOL CELL BIOL, V18, P6457, DOI 10.1128/MCB.18.11.6457
   Roman-Gomez J, 2002, BLOOD, V99, P2291, DOI 10.1182/blood.V99.7.2291
   Saleh A, 1999, J BIOL CHEM, V274, P17941, DOI 10.1074/jbc.274.25.17941
   Salvesen HB, 2001, INT J CANCER, V91, P22, DOI 10.1002/1097-0215(20010101)91:1<22::AID-IJC1002>3.0.CO;2-S
   Santos-Rosa H, 2002, NATURE, V419, P407, DOI 10.1038/nature01080
   Santourlidis S, 2001, MOL CARCINOGEN, V32, P36, DOI 10.1002/mc.1062
   Sathyanarayana UG, 2003, CLIN CANCER RES, V9, P2665
   Sato N, 2004, INT J ONCOL, V24, P679
   Sellar GC, 2003, NAT GENET, V34, P337, DOI 10.1038/ng1183
   Shimodaira H, 2003, P NATL ACAD SCI USA, V100, P2420, DOI 10.1073/pnas.0438031100
   Silber JR, 1999, CLIN CANCER RES, V5, P807
   Silber JR, 1998, CANCER RES, V58, P1068
   Slee EA, 1999, CELL DEATH DIFFER, V6, P1067, DOI 10.1038/sj.cdd.4400601
   Soengas MS, 2001, NATURE, V409, P207, DOI 10.1038/35051606
   Stimson KM, 2002, J BIOL CHEM, V277, P4951, DOI 10.1074/jbc.M109809200
   Stojic L, 2004, GENE DEV, V18, P1331, DOI 10.1101/gad.294404
   Strahl BD, 2000, NATURE, V403, P41, DOI 10.1038/47412
   Strathdee G, 2004, CARCINOGENESIS, V25, P693, DOI 10.1093/carcin/bgh066
   Strathdee G, 1999, ONCOGENE, V18, P2335, DOI 10.1038/sj.onc.1202540
   Struhl K, 1998, GENE DEV, V12, P599, DOI 10.1101/gad.12.5.599
   Suh ER, 2002, J BIOL CHEM, V277, P35795, DOI 10.1074/jbc.M205567200
   Szyf M, 2003, DRUG RESIST UPDATE, V6, P341, DOI 10.1016/j.drup.2003.10.002
   Taniguchi T, 2003, NAT MED, V9, P568, DOI 10.1038/nm852
   TATE PH, 1993, CURR OPIN GENET DEV, V3, P226, DOI 10.1016/0959-437X(93)90027-M
   TAYLOR SM, 1979, CELL, V17, P771, DOI 10.1016/0092-8674(79)90317-9
   Teitz T, 2000, NAT MED, V6, P529, DOI 10.1038/75007
   Tischkowitz M, 2003, BRIT J HAEMATOL, V123, P469, DOI 10.1046/j.1365-2141.2003.04640.x
   Toyooka KO, 2001, CANCER RES, V61, P4556
   Toyota M, 2001, BLOOD, V97, P2823, DOI 10.1182/blood.V97.9.2823
   Toyota M, 1999, P NATL ACAD SCI USA, V96, P8681, DOI 10.1073/pnas.96.15.8681
   Tyler JK, 1999, CELL, V99, P443, DOI 10.1016/S0092-8674(00)81530-5
   Umbricht CB, 2001, ONCOGENE, V20, P3348, DOI 10.1038/sj.onc.1204438
   VanLint C, 1996, GENE EXPRESSION, V5, P245
   Verkaik NS, 1999, INT J CANCER, V80, P439
   Vertino PM, 2002, CELL CYCLE, V1, P416, DOI 10.4161/cc.1.6.270
   Walsh CP, 1998, NAT GENET, V20, P116, DOI 10.1038/2413
   Warrell RP, 1998, JNCI-J NATL CANCER I, V90, P1621, DOI 10.1093/jnci/90.21.1621
   Wei SH, 2002, CLIN CANCER RES, V8, P2246
   Wei SH, 2003, ANN NY ACAD SCI, V983, P243, DOI 10.1111/j.1749-6632.2003.tb05979.x
   Whitcomb BP, 2003, CLIN CANCER RES, V9, P2277
   Worm J, 2001, J BIOL CHEM, V276, P39990, DOI 10.1074/jbc.M103181200
   Yamada Y, 2004, GENOME RES, V14, P247, DOI 10.1101/gr.1351604
   Yamashita Y, 2003, INT J CANCER, V103, P572, DOI 10.1002/ijc.10699
   Yuan BZ, 2003, CANCER GENET CYTOGEN, V140, P113, DOI 10.1016/S0165-4608(02)00674-X
NR 152
TC 98
Z9 103
U1 0
U2 12
PU CHURCHILL LIVINGSTONE
PI EDINBURGH
PA JOURNAL PRODUCTION DEPT, ROBERT STEVENSON HOUSE, 1-3 BAXTERS PLACE,
   LEITH WALK, EDINBURGH EH1 3AF, MIDLOTHIAN, SCOTLAND
SN 1368-7646
EI 1532-2084
J9 DRUG RESIST UPDATE
JI Drug Resist. Update
PD AUG-OCT
PY 2004
VL 7
IS 4-5
BP 267
EP 278
DI 10.1016/j.drup.2004.06.005
PG 12
WC Pharmacology & Pharmacy
WE Science Citation Index Expanded (SCI-EXPANDED)
SC Pharmacology & Pharmacy
GA 876LA
UT WOS:000225497100005
PM 15533764
DA 2022-04-10
ER

PT J
AU Dimitrakopoulos, FI
   Kottorou, A
   Tzezou, A
AF Dimitrakopoulos, Foteinos-Ioannis
   Kottorou, Anastasia
   Tzezou, Aspasia
TI Endocrine resistance and epigenetic reprogramming in estrogen receptor
   positive breast cancer
SO CANCER LETTERS
LA English
DT Article
DE Endocrine resistance; epigenetic; Methylation; histone modification;
   ncRNA
ID ENHANCES TAMOXIFEN RESISTANCE; AROMATASE inhibitor; gene expression;
   NONCODING RNAS; CELL-DEATH; PHASE-II; THERAPY; ALPHA; METHYLATION;
   ACTIVATION
AB Despite the enormous advances during the last three decades, breast cancer continues to be the most frequent type of cancer as well as one of the most frequent cancer-related causes of death in women. Therapeutic management of patients with hormone receptor-positive breast cancer becomes very often a challenge, since de novo or acquired resistance deprives a significant percentage of the patients from the clinical benefit of the welltolerated hormone therapy. Several molecular mechanism are implicated in resistance to endocrine therapy, including changes in hormone receptor signaling, activation of parallel signaling pathway, modifications of cell cycle regulators, activation of different transcription factor as well as changes in stem cells activity. In addition, a growing number of studies supports the pivotal role of epigenetic changes not only in the initiation and progression of breast cancer, but also in resistance to endocrine therapy. These changes refer to DNA methylation, histone post-translational modification as well as to ncRNAs alterations. In this review, we provide an overview of epigenetic mechanism underlying the endocrine resistance focusing exclusively on breast cancer patients.
C1 [Dimitrakopoulos, Foteinos-Ioannis; Kottorou, Anastasia] Univ Patras, Med Sch Patras, Mol Oncol Lab, Patras 26500, Greece.
   [Dimitrakopoulos, Foteinos-Ioannis; Kottorou, Anastasia] Univ Hosp Patras, Div Oncol, Patras 26500, Greece.
   [Tzezou, Aspasia] Univ Thessaly, Sch Hlth Sci, Lab Biol, Fac Med, Biopolis 41500, Larissa, Greece.
   [Tzezou, Aspasia] Univ Thessaly, Sch Hlth Sci, Lab Cytogenet & Mol Genet, Fac Med, Biopolis 41500, Larissa, Greece.
RP Tzezou, A (corresponding author), Univ Thessaly, Fac Med, Lab Cytogenet & Mol Genet, Biopolis 41500, Larissa, Greece.; Tzezou, A (corresponding author), Univ Thessaly, Fac Med, Lab Biol, Biopolis 41500, Larissa, Greece.
EM atsezou@med.uth.gr
RI Dimitrakopoulos, Foteinos-Ioannis/AAB-1434-2019
OI Dimitrakopoulos, Foteinos-Ioannis/0000-0003-2402-2549
CR Achinger-Kawecka J, 2020, NAT COMMUN, V11, DOI 10.1038/s41467-019-14098-x
   Auchus ML, 2012, J INVEST MED, V60, P495, DOI 10.2310/JIM.0b013e3182408567
   Azad N, 2013, NAT REV CLIN ONCOL, V10, P256, DOI 10.1038/nrclinonc.2013.42
   Bhattacharjee D, 2016, SCIENTIFICA, V2016, DOI 10.1155/2016/6072357
   Cancer N., 2012, NATURE, V490, P61
   Cardoso F, 2019, ANN ONCOL, V30, P1194, DOI 10.1093/annonc/mdz173
   Cardoso F.e.a, 2020, BREAST CANC ESSENTIA
   Chen DS, 1999, MOL CELL BIOL, V19, P1002
   Chen ZK, 2015, BREAST CANCER RES TR, V152, P29, DOI 10.1007/s10549-015-3446-8
   Damaskos C, 2017, ANTICANCER RES, V37, P35, DOI 10.21873/anticanres.11286
   Darwiche N, 2020, AM J CANCER RES, V10, P1954
   Davies C, 2013, LANCET, V381, P805, DOI 10.1016/S0140-6736(12)61963-1
   Dawson MA, 2017, SCIENCE, V355, P1147, DOI 10.1126/science.aam7304
   Eliassen AH, 2008, ADV EXP MED BIOL, V630, P148
   Fan J, 2008, J CANCER RES CLIN, V134, P883, DOI 10.1007/s00432-008-0354-x
   Fan MY, 2006, CANCER RES, V66, P11954, DOI 10.1158/0008-5472.CAN-06-1666
   Feng Q, 2014, CELL RES, V24, P809, DOI 10.1038/cr.2014.71
   Feng YX, 2018, GENES DIS, V5, P77, DOI 10.1016/j.gendis.2018.05.001
   Ferlay J, 2018, EUR J CANCER, V103, P356, DOI 10.1016/j.ejca.2018.07.005
   Fuentes N, 2019, ADV PROTEIN CHEM STR, V116, P135, DOI 10.1016/bs.apcsb.2019.01.001
   Gala K, 2018, ONCOGENE, V37, P4692, DOI 10.1038/s41388-018-0273-5
   Gao L, 2020, FRONT ONCOL, V10, DOI 10.3389/fonc.2020.600487
   Germain D, 2011, ENDOCRIN METAB CLIN, V40, P473, DOI 10.1016/j.ecl.2011.05.009
   Giacinti L, 2012, J CELL PHYSIOL, V227, P3426, DOI 10.1002/jcp.24043
   Giuliano AE, 2017, CA-CANCER J CLIN, V67, P291, DOI 10.3322/caac.21393
   Godinho MFE, 2010, BRIT J CANCER, V103, P1284, DOI 10.1038/sj.bjc.6605884
   GOTTARDIS MM, 1988, CANCER RES, V48, P812
   Gradishar WJ, 2020, J NATL COMPR CANC NE, V18, P452, DOI 10.6004/jnccn.2020.0016
   GREENE GL, 1986, SCIENCE, V231, P1150, DOI 10.1126/science.3753802
   Gu J, 2018, CANCER LETT, V434, P1, DOI 10.1016/j.canlet.2018.06.039
   Hamadeh IS, 2018, CANCER TREAT REV, V70, P47, DOI 10.1016/j.ctrv.2018.07.014
   Hanahan D, 2011, CELL, V144, P646, DOI 10.1016/j.cell.2011.02.013
   Hanker AB, 2020, CANCER CELL, V37, P496, DOI 10.1016/j.ccell.2020.03.009
   Haque MM, 2019, FRONT ENDOCRINOL, V10, DOI 10.3389/fendo.2019.00573
   Harbeck N, 2019, NAT REV DIS PRIMERS, V5, DOI [10.1038/s41572-019-0122-z, 10.1038/s41572-019-0111-2]
   HARPER MJK, 1967, J REPROD FERTIL, V13, P101
   Hinohara K, 2018, CANCER CELL, V34, P939, DOI 10.1016/j.ccell.2018.10.014
   Hoskins JM, 2009, NAT REV CANCER, V9, P576, DOI 10.1038/nrc2683
   Howard EW, 2018, BIOL PROCED ONLINE, V20, DOI 10.1186/s12575-018-0082-9
   HOWELL A, 1995, LANCET, V345, P989, DOI 10.1016/S0140-6736(95)91156-1
   Huang NS, 2016, ONCOTARGET, V7, P37957, DOI 10.18632/oncotarget.9364
   Huang S, 2019, CANCER CELL INT, V19, DOI 10.1186/s12935-019-0887-x
   Jahangiri R, 2018, J CELL PHYSIOL, V233, P7305, DOI 10.1002/jcp.26562
   Jiang ZF, 2019, LANCET ONCOL, V20, P806, DOI 10.1016/S1470-2045(19)30164-0
   Jimenez-Gardnno AM, 2017, BIOCHEM BIOPH RES CO, V490, P780, DOI 10.1016/j.bbrc.2017.06.117
   Jin ML, 2018, INT J CANCER, V143, P2871, DOI 10.1002/ijc.31853
   John S, 2008, CANCER RES, V68, P7855, DOI 10.1158/0008-5472.CAN-07-5875
   Johnston SRD, 2003, NAT REV CANCER, V3, P821, DOI 10.1038/nrc1211
   Jordan VC, 2008, EUR J CANCER, V44, P30, DOI 10.1016/j.ejca.2007.11.002
   Kangaspeska S, 2008, NATURE, V452, P112, DOI 10.1038/nature06640
   Kung JTY, 2013, GENETICS, V193, P651, DOI 10.1534/genetics.112.146704
   Li H., 2017, CANC RES, V77
   Li JJ, 2019, CANCER MED-US, V8, P1943, DOI 10.1002/cam4.2095
   Li Z, 2019, INT J ONCOL, V54, P1033, DOI 10.3892/ijo.2019.4679
   Liang J, 2013, ANNU REV PHYSIOL, V75, P225, DOI 10.1146/annurev-physiol-030212-183708
   Liang YR, 2019, MOL THER-NUCL ACIDS, V17, P347, DOI 10.1016/j.omtn.2019.05.005
   Lin X, 2013, BREAST CANCER RES, V15, DOI 10.1186/bcr3588
   Liu HY, 2016, PLOS ONE, V11, DOI 10.1371/journal.pone.0168406
   Liu WJ, 2019, CLIN epigenetic, V11, DOI 10.1186/s13148-019-0620-6
   Liu YY, 2020, INT J MOL MED, V45, P497, DOI 10.3892/ijmm.2019.4428
   Lo PK, 2016, BRIEF FUNCT GENOMICS, V15, P200, DOI 10.1093/bfgp/elv055
   Ma TT, 2020, CELL SIGNAL, V68, DOI 10.1016/j.cellsig.2020.109536
   Ma Y, 2019, J CELL PHYSIOL, V234, P2880, DOI 10.1002/jcp.27105
   Magnani L, 2013, P NATL ACAD SCI USA, V110, pE1490, DOI 10.1073/pnas.1219992110
   Mahajan K, 2014, J BIOL CHEM, V289, P28179, DOI 10.1074/jbc.M114.584425
   Masri S, 2010, BREAST CANCER RES TR, V124, P89, DOI 10.1007/s10549-009-0716-3
   McDonnell DP, 2015, J MED CHEM, V58, P4883, DOI 10.1021/acs.jmedchem.5b00760
   Meseure D, 2016, BRIT J CANCER, V114, P1395, DOI 10.1038/bjc.2016.123
   Miller TE, 2008, J BIOL CHEM, V283, P29897, DOI 10.1074/jbc.M804612200
   Miller WL, 2011, ENDOCR REV, V32, P81, DOI 10.1210/er.2010-0013
   Mitobe Y, 2019, MOL CELL BIOL, V39, DOI 10.1128/MCB.00261-19
   Mohammad HP, 2019, NAT MED, V25, P403, DOI 10.1038/s41591-019-0376-8
   Montenegro MF, 2014, BMC CANCER, V14, DOI 10.1186/1471-2407-14-539
   Mosselman S, 1996, FEBS LETT, V392, P49, DOI 10.1016/0014-5793(96)00782-X
   Munster PN, 2011, BRIT J CANCER, V104, P1828, DOI 10.1038/bjc.2011.156
   Musgrove EA, 2009, NAT REV CANCER, V9, P631, DOI 10.1038/nrc2713
   Nayak SR, 2015, HORM CANCER-US, V6, P214, DOI 10.1007/s12672-015-0230-5
   Nilsson S, 2005, BASIC CLIN PHARMACOL, V96, P15, DOI 10.1111/j.1742-7843.2005.pto960103.x
   OTTAVIANO YL, 1994, CANCER RES, V54, P2552
   Pandey DP, 2009, MOL CELL BIOL, V29, P3783, DOI 10.1128/MCB.01875-08
   Patel HK, 2018, PHARMACOL THERAPEUT, V186, P1, DOI 10.1016/j.pharmthera.2017.12.012
   Pathiraja TN, 2014, SCI TRANSL MED, V6, DOI 10.1126/scitranslmed.3008326
   Patten DK, 2018, NAT MED, V24, P1469, DOI 10.1038/s41591-018-0091-x
   Perou CM, 2000, NATURE, V406, P747, DOI 10.1038/35021093
   Pistelli M, 2018, CURR ONCOL, V25, pE168, DOI 10.3747/co.25.3735
   Rani A, 2019, FRONT ENDOCRINOL, V10, DOI 10.3389/fendo.2019.00245
   Rao X, 2011, ONCOGENE, V30, P1082, DOI 10.1038/onc.2010.487
   Razavi P, 2018, CANCER CELL, V34, P427, DOI 10.1016/j.ccell.2018.08.008
   Sang YT, 2019, MOL THER, V27, P1638, DOI 10.1016/j.ymthe.2019.05.011
   Sansone P, 2017, CANCER RES, V77, P1927, DOI 10.1158/0008-5472.CAN-16-2129
   Sher G., 2020, SEMIN CANCER BIOL
   Shi QF, 2020, NAT COMMUN, V11, DOI 10.1038/s41467-020-19349-w
   Shi YF, 2019, EUR REV MED PHARMACO, V23, P1563, DOI 10.26355/eurrev_201902_17115
   Siegel RL, 2019, CA-CANCER J CLIN, V69, P7, DOI 10.3322/caac.21551
   Soleimani S.B.M., 2019, 826198 BIORXIV 826198 BIORXIV
   Stone A, 2015, NAT COMMUN, V6, DOI 10.1038/ncomms8758
   Thiebaut C, 2019, INT J MOL SCI, V20, DOI 10.3390/ijms20112637
   Uhr K, 2018, SCI REP-UK, V8, DOI 10.1038/s41598-018-27987-w
   Vilquin P, 2015, BREAST CANCER RES, V17, DOI 10.1186/s13058-015-0515-1
   WAKELING AE, 1988, J STEROID BIOCHEM, V31, P645, DOI 10.1016/0022-4731(88)90014-3
   Waks AG, 2019, JAMA-J AM MED ASSOC, V321, P288, DOI 10.1001/jama.2018.19323
   WALTER P, 1985, P NATL ACAD SCI USA, V82, P7889, DOI 10.1073/pnas.82.23.7889
   Wang J, 2019, J HEMATOL ONCOL, V12, DOI 10.1186/s13045-019-0747-0
   Wang JJ, 2016, CANCER LETT, V378, P69, DOI 10.1016/j.canlet.2016.05.004
   Wang KC, 2011, MOL CELL, V43, P904, DOI 10.1016/j.molcel.2011.08.018
   Wei YF, 2014, BREAST CANCER RES TR, V147, P423, DOI 10.1007/s10549-014-3037-0
   Weigelt B, 2010, MOL ONCOL, V4, P192, DOI 10.1016/j.molonc.2010.04.004
   Wickramasinghe NS, 2009, NUCLEIC ACIDS RES, V37, P2584, DOI 10.1093/nar/gkp117
   Wu CH, 2016, MED SCI MONITOR, V22, P3860, DOI 10.12659/MSM.900689
   Wu Q, 2015, J CELL MOL MED, V19, P2874, DOI 10.1111/jcmm.12681
   Wu YM, 2018, CANCER RES, V78, P671, DOI 10.1158/0008-5472.CAN-17-1327
   Xue X, 2016, ONCOGENE, V35, P2746, DOI 10.1038/onc.2015.340
   Yager JD, 2006, NEW ENGL J MED, V354, P270, DOI 10.1056/NEJMra050776
   Yamamoto S, 2014, CANCER CELL, V25, P762, DOI 10.1016/j.ccr.2014.04.024
   Yang S, 2018, BMB REP, V51, P450, DOI 10.5483/BMBRep.2018.51.9.020
   Yang XW, 2001, CANCER RES, V61, P7025
   Yang XW, 2000, CANCER RES, V60, P6890
   Yardley DA, 2013, J CLIN ONCOL, V31, P2128, DOI 10.1200/JCO.2012.43.7251
   Ye LP, 2019, EMBO MOL MED, V11, DOI 10.15252/emmm.201910638
   Yu XF, 2016, BIOMED PHARMACOTHER, V77, P37, DOI 10.1016/j.biopha.2015.11.005
   Yu-Rice Y, 2016, ONCOGENE, V35, P5400, DOI 10.1038/onc.2016.78
   Zhang F, 2019, ONCOL LETT, V18, P1287, DOI 10.3892/ol.2019.10405
   Zhang HY, 2017, CANCER CHEMOTH PHARM, V79, P327, DOI 10.1007/s00280-016-3208-2
   Zhou Q, 2018, ANTI-CANCER DRUG, V29, P539, DOI 10.1097/CAD.0000000000000623
NR 124
TC 0
Z9 0
U1 3
U2 4
PU ELSEVIER IRELAND LTD
PI CLARE
PA ELSEVIER HOUSE, BROOKVALE PLAZA, EAST PARK SHANNON, CO, CLARE, 00000,
   IRELAND
SN 0304-3835
EI 1872-7980
J9 CANCER LETT
JI Cancer Lett.
PD OCT 1
PY 2021
VL 517
BP 55
EP 65
DI 10.1016/j.canlet.2021.05.030
EA JUN 2021
PG 11
WC Oncology
WE Science Citation Index Expanded (SCI-EXPANDED)
SC Oncology
GA TQ8IV
UT WOS:000678522800002
PM 34077785
DA 2022-04-10
ER

PT J
AU Diaz, Z
   Aguilar-Mahecha, A
   Paquet, ER
   Basik, M
   Orain, M
   Camlioglu, E
   Constantin, A
   Benlimame, N
   Bachvarov, D
   Jannot, G
   Simard, MJ
   Chabot, B
   Gologan, A
   Klinck, R
   Gagnon-Kugler, T
   Lesperance, B
   Samson, B
   Kavan, P
   Alcindor, T
   Dalfen, R
   Lan, C
   Chabot, C
   Buchanan, M
   Przybytkowski, E
   Qureshi, S
   Rousseau, C
   Spatz, A
   Tetu, B
   Batist, G
AF Diaz, Zuanel
   Aguilar-Mahecha, Adriana
   Paquet, Eric R.
   Basik, Mark
   Orain, Michele
   Camlioglu, Errol
   Constantin, Andre
   Benlimame, Naciba
   Bachvarov, Dimcho
   Jannot, Guillaume
   Simard, Martin J.
   Chabot, Benoit
   Gologan, Adrian
   Klinck, Roscoe
   Gagnon-Kugler, Therese
   Lesperance, Bernard
   Samson, Benoit
   Kavan, Petr
   Alcindor, Thierry
   Dalfen, Richard
   Lan, Cathy
   Chabot, Catherine
   Buchanan, Marguerite
   Przybytkowski, Ewa
   Qureshi, Samia
   Rousseau, Caroline
   Spatz, Alan
   Tetu, Bernard
   Batist, Gerald
TI Next-generation biobanking of metastases to enable multidimensional
   molecular profiling in personalized medicine
SO MODERN PATHOLOGY
LA English
DT Article
DE biobanking; biopsy; biospecimen; colorectal cancer; liver metastasis;
   molecular profiling; pre-analytical variables
ID COPY NUMBER ALTERATIONS; colorectal cancer; EXPRESSION; GENE; DNA;
   METHYLATION; PROGNOSIS; TUMOR; RAS; CGH
AB Great advances in analytical technology coupled with accelerated new drug development and growing understanding of biological challenges, such as tumor heterogeneity, have required a change in the focus for biobanking. Most current banks contain samples of primary tumors, but linking molecular signatures to therapeutic questions requires serial biopsies in the setting of metastatic disease, next-generation of biobanking. Furthermore, an integration of multidimensional analysis of various molecular components, that is, RNA, DNA, methylome, microRNAome and post-translational modification of the proteome, is necessary for a comprehensive view of a tumor's biology. While data using such biopsies are now regularly presented, the preanalytical variables in tissue procurement and processing in multicenter studies are seldom detailed and therefore are difficult to duplicate or standardize across sites and across studies. In the context of a biopsy-driven clinical trial, we generated a detailed protocol that includes morphological evaluation and isolation of high-quality nucleic acids from small needle core biopsies obtained from liver metastases. The protocol supports stable shipping of samples to a central laboratory, where biopsies are subsequently embedded in support media. Designated pathologists must evaluate all biopsies for tumor content and macrodissection can be performed if necessary to meet our criteria of >60% neoplastic cells and <20% necrosis for genomic isolation. We validated our protocol in 40 patients who participated in a biopsy-driven study of therapeutic resistance in metastatic colorectal cancer. To ensure that our protocol was compatible with multiplex discovery platforms and that no component of the processing interfered with downstream enzymatic reactions, we performed array comparative genomic hybridization, methylation profiling, microRNA profiling, splicing variant analysis and gene expression profiling using genomic material isolated from liver biopsy cores. Our standard operating procedures for next-generation biobanking can be applied widely in multiple settings, including multicentered and international biopsy-driven trials.
C1 [Diaz, Zuanel; Gagnon-Kugler, Therese; Qureshi, Samia; Rousseau, Caroline; Batist, Gerald] Quebec Clin Res Org Canc, Montreal, PQ, Canada.
   [Aguilar-Mahecha, Adriana; Basik, Mark; Kavan, Petr; Lan, Cathy; Chabot, Catherine; Buchanan, Marguerite; Przybytkowski, Ewa; Batist, Gerald] McGill Univ, Jewish Gen Hosp, Dept Oncol, Segal Canc Ctr, Montreal, PQ H3T 1E2, Canada.
   [Paquet, Eric R.] McGill Univ, Dept Biochem, Montreal, PQ H3T 1E2, Canada.
   [Orain, Michele; Tetu, Bernard] Hop St Sacrement, Dept Pathol, Quebec City, PQ, Canada.
   [Camlioglu, Errol; Constantin, Andre] McGill Univ, Jewish Gen Hosp, Dept Radiol, Montreal, PQ H3T 1E2, Canada.
   [Benlimame, Naciba; Gologan, Adrian; Spatz, Alan] McGill Univ, Jewish Gen Hosp, Dept Pathol, Montreal, PQ H3T 1E2, Canada.
   [Bachvarov, Dimcho] Univ Laval, Dept Mol Med, Quebec City, PQ, Canada.
   [Jannot, Guillaume; Simard, Martin J.] Univ Laval, Canc Res Ctr, Hotel Dieu Quebec CHUQ, Quebec City, PQ, Canada.
   [Chabot, Benoit; Klinck, Roscoe] Univ Sherbrooke, Fac Med & Sci Sante, Dept Microbiol & Infectiol, Sherbrooke, PQ J1K 2R1, Canada.
   [Lesperance, Bernard] Hop Sacre Coeur, Dept Med, Montreal, PQ H4J 1C5, Canada.
   [Samson, Benoit] Hop Charles Lemoyne, Dept Oncol, CICM, Greenfield Pk, PQ, Canada.
   [Kavan, Petr; Alcindor, Thierry] McGill Univ, Dept Oncol, Ctr Hlth, Montreal, PQ, Canada.
   [Dalfen, Richard] St Marys Hosp, Dept Med Oncol, Montreal, PQ, Canada.
RP Batist, G (corresponding author), McGill Univ, Jewish Gen Hosp, Dept Oncol, 3999 Cote Ste Catherine Rd, Montreal, PQ H3T 1E2, Canada.
EM gerald.batist@mcgill.ca
RI SPATZ, ALAN/B-8645-2009
OI SPATZ, ALAN/0000-0003-3020-1420; Diaz, Zuanel/0000-0002-4866-9614;
   Paquet, Eric/0000-0001-9194-1655; Chabot, Benoit/0000-0003-0994-0042;
   Simard, Martin/0000-0002-3189-9309; Bachvarov,
   Dimcho/0000-0001-6509-9599
FU PFIZER-FRSQ Innovation Fund award; Sanofi-AventisSanofi-Aventis;
   Canadian Institutes of Health Research (CIHR)Canadian Institutes of
   Health Research (CIHR)
FX We acknowledge the patients, site coordinators and interventional
   radiologists at the centers participating in the Q-CROC-01 study. We are
   grateful to Caroline Pouliot for producing artwork. The Q-CROC-01 trial
   is supported by a PFIZER-FRSQ Innovation Fund award and by
   Sanofi-Aventis. ERP is supported by a Doctoral scholarship from Canadian
   Institutes of Health Research (CIHR). The funding organizations have no
   role in study design, data collection and analysis, approval or
   preparation of the manuscript.
CR Aguilar-Mahecha A, 2011, J MED PERSON, V9, P8
   Barker AD, 2009, CLIN PHARMACOL THER, V86, P97, DOI 10.1038/clpt.2009.68
   Begley CG, 2012, NATURE, V483, P531, DOI 10.1038/483531a
   Bell D, 2011, NATURE, V474, P609, DOI 10.1038/nature10166
   Camps J, 2006, CARCINOGENESIS, V27, P419, DOI 10.1093/carcin/bgi244
   Cleator SJ, 2006, BREAST CANCER RES, V8, DOI 10.1186/bcr1506
   De Angelis PM, 1999, BRIT J CANCER, V80, P526
   Douglas EJ, 2004, CANCER RES, V64, P4817, DOI 10.1158/0008-5472.CAN-04-0328
   Ellis M, 2002, CLIN CANCER RES, V8, P1155
   GAMASOSA MA, 1983, NUCLEIC ACIDS RES, V11, P6883, DOI 10.1093/nar/11.19.6883
   GOELZ SE, 1985, SCIENCE, V228, P187, DOI 10.1126/science.2579435
   Guo CG, 2008, GENE CHROMOSOME CANC, V47, P939, DOI 10.1002/gcc.20596
   Hellman A, 2007, SCIENCE, V315, P1141, DOI 10.1126/science.1136352
   Hermsen M, 2002, GASTROENTEROLOGY, V123, P1109, DOI 10.1053/gast.2002.36051
   Hoffmann Gaby, 2009, Comp Hepatol, V8, P3, DOI 10.1186/1476-5926-8-3
   Kanehisa M, 2010, NUCLEIC ACIDS RES, V38, pD355, DOI 10.1093/nar/gkp896
   Kim ES, 2011, CANCER DISCOV, V1, P44, DOI 10.1158/2159-8274.CD-10-0010
   Kissinger CB, 2012, BIOANALYSIS, V4, P1411, DOI [10.4155/BIO.12.125, 10.4155/bio.12.125]
   Kurashina K, 2008, CANCER SCI, V99, P1835, DOI 10.1111/j.1349-7006.2008.00881.x
   MAGRISSO IJ, 1993, LAB INVEST, V69, P674
   Meric-Bernstam F, 2012, NAT REV CLIN ONCOL, V9, P542, DOI 10.1038/nrclinonc.2012.127
   Moore HM, 2011, BIOPRESERV BIOBANK, V9, P57, DOI 10.1089/bio.2010.0036
   Muzny DM, 2012, NATURE, V487, P330, DOI 10.1038/nature11252
   Nakao K, 2004, CARCINOGENESIS, V25, P1345, DOI 10.1093/carcin/bgh134
   Nazarian R, 2010, NATURE, V468, P973, DOI 10.1038/nature09626
   Nelson PT, 2008, BBA-GENE REGUL MECH, V1779, P758, DOI 10.1016/j.bbagrm.2008.03.012
   Patel IJ, 2012, J VASC INTERV RADIOL, V23, P727, DOI 10.1016/j.jvir.2012.02.012
   Przybytkowski E, 2011, BMC MED GENOMICS, V4, DOI 10.1186/1755-8794-4-16
   Schetter AJ, 2008, JAMA-J AM MED ASSOC, V299, P425, DOI 10.1001/jama.299.4.425
   Sequist LV, 2011, SCI TRANSL MED, V3, DOI 10.1126/scitranslmed.3002003
   SHARRARD RM, 1992, BRIT J CANCER, V65, P667, DOI 10.1038/bjc.1992.142
   Simeon-Dubach D, 2012, J PATHOL, V228, P431, DOI 10.1002/path.4117
   Slaby O, 2009, MOL CANCER, V8, DOI 10.1186/1476-4598-8-102
   Smyth GK, 2004, STAT APPL GENET MOL, V3
   Srinivasan M, 2002, AM J PATHOL, V161, P1961, DOI 10.1016/S0002-9440(10)64472-0
   Taylor BS, 2010, CANCER CELL, V18, P11, DOI 10.1016/j.ccr.2010.05.026
   Thorvaldsdottir H, 2013, BRIEF BIOINFORM, V14, P178, DOI 10.1093/bib/bbs017
   Vandesompele J, 2002, GENOME BIOL, V3, DOI 10.1186/gb-2002-3-7-research0034
   Venables JP, 2008, CANCER RES, V68, P9525, DOI 10.1158/0008-5472.CAN-08-1769
   Venables JP, 2009, NAT STRUCT MOL BIOL, V16, P670, DOI 10.1038/nsmb.1608
   Verderio P, 2012, J CLIN ONCOL, V30, P1912, DOI 10.1200/JCO.2012.41.7386
   Vignot S, 2012, CRIT REV ONCOL HEMAT, V84, P301, DOI 10.1016/j.critrevonc.2012.05.002
   Yang LD, 2009, WORLD J SURG, V33, P638, DOI 10.1007/s00268-008-9865-5
NR 43
TC 25
Z9 25
U1 0
U2 10
PU NATURE PUBLISHING GROUP
PI NEW YORK
PA 75 VARICK ST, 9TH FLR, NEW YORK, NY 10013-1917 USA
SN 0893-3952
EI 1530-0285
J9 MODERN PATHOL
JI Mod. Pathol.
PD NOV
PY 2013
VL 26
IS 11
BP 1413
EP 1424
DI 10.1038/modpathol.2013.81
PG 12
WC Pathology
WE Science Citation Index Expanded (SCI-EXPANDED)
SC Pathology
GA 248GV
UT WOS:000326686700001
PM 23743930
OA Bronze
DA 2022-04-10
ER

PT J
AU Trovato, M
   Patil, V
   Gehre, M
   Noh, KM
AF Trovato, Matteo
   Patil, Vibha
   Gehre, Maja
   Noh, Kyung Min
TI Histone Variant H3.3 Mutations in Defining the Chromatin Function in
   Mammals
SO CELLS
LA English
DT Review
DE H3; 3; H3; histone variants; histones; post-translational modification;
   PTMs; chromatin; epigenetic
ID CENTROMERIC CHROMATIN; ENHANCER ACTIVITY; DRIVER MUTATIONS; ACTIVE
   CHROMATIN; PRC2 ACTIVITY; LYSINE 4; METHYLATION; TRANSCRIPTION;
   DISTINCT; ACETYLATION
AB The systematic mutation of histone 3 (H3) genes in model organisms has proven to be a valuable tool to distinguish the functional role of histone residues. No system exists in mammalian cells to directly manipulate canonical histone H3 due to a large number of clustered and multi-loci histone genes. Over the years, oncogenic histone mutations in a subset of H3 have been identified in humans, and have advanced our understanding of the function of histone residues in health and disease. The oncogenic mutations are often found in one allele of the histone variant H3.3 genes, but they prompt severe changes in the epigenetic landscape of cells, and contribute to cancer development. Therefore, mutation approaches using H3.3 genes could be relevant to the determination of the functional role of histone residues in mammalian development without the replacement of canonical H3 genes. In this review, we describe the key findings from the H3 mutation studies in model organisms wherein the genetic replacement of canonical H3 is possible. We then turn our attention to H3.3 mutations in human cancers, and discuss H3.3 substitutions in the N-terminus, which were generated in order to explore the specific residue or associated post-translational modification.
C1 [Trovato, Matteo; Patil, Vibha; Gehre, Maja; Noh, Kyung Min] European Mol Biol Lab EMBL, Genome Biol Unit, D-69117 Heidelberg, Germany.
   [Trovato, Matteo; Gehre, Maja] Collaborat Joint PhD Degree EMBL & Heidelberg Uni, Fac Biosci, D-69117 Heidelberg, Germany.
RP Noh, KM (corresponding author), European Mol Biol Lab EMBL, Genome Biol Unit, D-69117 Heidelberg, Germany.
EM matteo.trovato@embl.de; vibha.patil@embl.de; maja.gehre@embl.de;
   kyung.min.noh@embl.de
OI Gehre, Maja/0000-0001-6567-6464; Trovato, Matteo/0000-0003-0406-387X
FU EMBL; DFGGerman Research Foundation (DFG)European Commission [SPP 1738];
   EIPOD
FX This research is supported by the EMBL predoctoral fund (to M.T. and
   M.G.), the DFG fund (SPP 1738 to K.M.N.), the EIPOD postdoctoral fund
   (to V.P.).
CR Adhvaryu KK, 2011, PLOS GENET, V7, DOI 10.1371/journal.pgen.1002423
   Ahmad K, 2002, MOL CELL, V9, P1191, DOI 10.1016/S1097-2765(02)00542-7
   Armache A, 2020, NATURE, V583, P852, DOI 10.1038/s41586-020-2533-0
   Arrowsmith CH, 2012, NAT REV DRUG DISCOV, V11, P384, DOI 10.1038/nrd3674
   Atlasi Y, 2017, NAT REV GENET, V18, DOI 10.1038/nrg.2017.57
   Bannister AJ, 2011, CELL RES, V21, P381, DOI 10.1038/cr.2011.22
   Barski A, 2007, CELL, V129, P823, DOI 10.1016/j.cell.2007.05.009
   Behjati S, 2013, NAT GENET, V45, P1479, DOI 10.1038/ng.2814
   Bonn S, 2012, NAT GENET, V44, P148, DOI 10.1038/ng.1064
   Brumbaugh J, 2019, NAT CELL BIOL, V21, P1449, DOI 10.1038/s41556-019-0403-5
   Bush KM, 2013, EPIGENET CHROMATIN, V6, DOI 10.1186/1756-8935-6-7
   Calo E, 2013, MOL CELL, V49, P825, DOI 10.1016/j.molcel.2013.01.038
   Cao KX, 2020, P NATL ACAD SCI USA, V117, P27365, DOI 10.1073/pnas.2001075117
   Chan KM, 2013, GENE DEV, V27, P985, DOI 10.1101/gad.217778.113
   Chen KY, 2020, COMMUN BIOL, V3, DOI 10.1038/s42003-020-1076-0
   Chen P, 2013, GENE DEV, V27, P2109, DOI 10.1101/gad.222174.113
   Chin JW, 2017, NATURE, V550, P53, DOI 10.1038/nature24031
   Choi J, 2014, NUCLEIC ACIDS RES, V42, P224, DOI 10.1093/nar/gkt873
   Clements EG, 2012, NUCLEIC ACIDS RES, V40, P4334, DOI 10.1093/nar/gks031
   Collinson A, 2016, CELL REP, V17, P2700, DOI 10.1016/j.celrep.2016.11.032
   Couldrey C, 1999, HUM MOL GENET, V8, P2489, DOI 10.1093/hmg/8.13.2489
   Creyghton MP, 2010, P NATL ACAD SCI USA, V107, P21931, DOI 10.1073/pnas.1016071107
   Dahlin JL, 2017, NAT COMMUN, V8, DOI 10.1038/s41467-017-01657-3
   Dai J, 2008, CELL, V134, P1066, DOI 10.1016/j.cell.2008.07.019
   Dang WW, 2009, NATURE, V459, P802, DOI 10.1038/nature08085
   Dominski Z, 2007, GENE, V396, P373, DOI 10.1016/j.gene.2007.04.021
   Khuong-Quang DA, 2012, ACTA NEUROPATHOL, V124, P439, DOI 10.1007/s00401-012-0998-0
   Dorighi KM, 2017, MOL CELL, V66, P568, DOI 10.1016/j.molcel.2017.04.018
   Drane P, 2010, GENE DEV, V24, P1253, DOI 10.1101/gad.566910
   Dunleavy E, 2005, TRENDS BIOCHEM SCI, V30, P172, DOI 10.1016/j.tibs.2005.02.007
   Elsasser SJ, 2016, NAT METHODS, V13, P158, DOI [10.1038/NMETH.3701, 10.1038/nmeth.3701]
   Elsaesser SJ, 2010, CURR OPIN GENET DEV, V20, P110, DOI 10.1016/j.gde.2010.01.003
   Elsasser SJ, 2015, NATURE, V522, P240, DOI 10.1038/nature14345
   Fang D, 2017, CELL CYCLE, V16, P1781, DOI 10.1080/15384101.2017.1281483
   Fang D, 2016, SCIENCE, V352, P1344, DOI 10.1126/science.aae0065
   Fang HT, 2018, NAT COMMUN, V9, DOI 10.1038/s41467-018-03904-7
   Fang J, 2018, P NATL ACAD SCI USA, V115, P9598, DOI 10.1073/pnas.1806355115
   Farrelly LA, 2019, NATURE, V567, P535, DOI 10.1038/s41586-019-1024-7
   Fellenberg J, 2019, CANCER LETT, V448, P61, DOI 10.1016/j.canlet.2019.02.001
   Ferrari KJ, 2014, MOL CELL, V53, P49, DOI 10.1016/j.molcel.2013.10.030
   Fierz B, 2012, NAT CHEM BIOL, V8, P417, DOI [10.1038/NCHEMBIO.938, 10.1038/nchembio.938]
   Filbin MG, 2018, SCIENCE, V360, P331, DOI 10.1126/science.aao4750
   Filipescu D, 2014, ANNU REV CELL DEV BI, V30, P615, DOI 10.1146/annurev-cellbio-100913-013311
   Fontebasso AM, 2014, NAT GENET, V46, P462, DOI 10.1038/ng.2950
   Funato K, 2014, SCIENCE, V346, P1529, DOI 10.1126/science.1253799
   Gehre M., 2019, BIORXIV, DOI DOI 10.1101/635151V1
   Gehre M, 2020, NAT GENET, V52, P273, DOI 10.1038/s41588-020-0586-5
   Gessi M, 2013, J NEURO-ONCOL, V112, P67, DOI 10.1007/s11060-012-1040-z
   Glozak MA, 2005, GENE, V363, P15, DOI 10.1016/j.gene.2005.09.010
   Goldberg AD, 2010, CELL, V140, P678, DOI 10.1016/j.cell.2010.01.003
   Graves HK, 2016, EPIGENET CHROMATIN, V9, DOI 10.1186/s13072-016-0059-3
   Gunesdogan U, 2010, EMBO REP, V11, P772, DOI 10.1038/embor.2010.124
   Hake SB, 2006, J BIOL CHEM, V281, P559, DOI 10.1074/jbc.M509266200
   Hake SB, 2005, P NATL ACAD SCI USA, V102, P6344, DOI 10.1073/pnas.0502413102
   Han S, 2017, NAT COMMUN, V8, DOI 10.1038/ncomms14568
   Harutyunyan AS, 2019, NAT COMMUN, V10, DOI 10.1038/s41467-019-09140-x
   Heintzman ND, 2007, NAT GENET, V39, P311, DOI 10.1038/ng1966
   Henikoff S, 2008, NAT REV GENET, V9, P15, DOI 10.1038/nrg2206
   Henikoff S, 2011, TRENDS GENET, V27, P389, DOI 10.1016/j.tig.2011.06.006
   Herz HM, 2014, SCIENCE, V345, P1065, DOI 10.1126/science.1255104
   Howman EV, 2000, P NATL ACAD SCI USA, V97, P1148, DOI 10.1073/pnas.97.3.1148
   Huang HL, 2009, GENOME RES, V19, P674, DOI 10.1101/gr.083402.108
   Hyland EA, 2005, MOL CELL BIOL, V25, P10060, DOI 10.1128/MCB.25.22.10060-10070.2005
   Hyland EM, 2011, GENE DEV, V25, P1306, DOI 10.1101/gad.2050311
   Jain SU, 2020, MOL CELL, V80, P726, DOI 10.1016/j.molcel.2020.09.028
   Jain SU, 2020, P NATL ACAD SCI USA, V117, P27354, DOI 10.1073/pnas.2006076117
   Jang CW, 2015, GENE DEV, V29, P1377, DOI 10.1101/gad.264150.115
   Jeong KW, 2011, NAT STRUCT MOL BIOL, V18, P1358, DOI 10.1038/nsmb.2153
   Johnson L, 2004, NUCLEIC ACIDS RES, V32, P6511, DOI 10.1093/nar/gkh992
   Justin N, 2016, NAT COMMUN, V7, DOI 10.1038/ncomms11316
   Kamakaka RT, 2005, GENE DEV, V19, P295, DOI 10.1101/gad.1272805
   Karmodiya K, 2012, BMC GENOMICS, V13, DOI 10.1186/1471-2164-13-424
   Kernohan KD, 2017, PEDIATR BLOOD CANCER, V64, DOI 10.1002/pbc.26633
   Koelsche C, 2017, CLIN SARCOMA RES, V7, DOI 10.1186/s13569-017-0075-5
   Kornberg RD, 1999, CELL, V98, P285, DOI 10.1016/S0092-8674(00)81958-3
   KORNBERG RD, 1974, SCIENCE, V184, P865, DOI 10.1126/science.184.4139.865
   Kouzarides T, 2007, CELL, V128, P693, DOI 10.1016/j.cell.2007.02.005
   Kraushaar DC, 2018, GENOME RES, V28, P1646, DOI 10.1101/gr.236224.118
   Kraushaar DC, 2013, GENOME BIOL, V14, DOI 10.1186/gb-2013-14-10-r121
   Krug B, 2019, CANCER CELL, V35, P782, DOI 10.1016/j.ccell.2019.04.004
   Larson JD, 2019, CANCER CELL, V35, P140, DOI 10.1016/j.ccell.2018.11.015
   Lavarone E, 2019, NAT COMMUN, V10, DOI 10.1038/s41467-019-09624-w
   Leatham-Jensen M, 2019, PLOS GENET, V15, DOI 10.1371/journal.pgen.1007932
   Lee CH, 2018, MOL CELL, V70, P422, DOI 10.1016/j.molcel.2018.03.020
   Lepack AE, 2020, SCIENCE, V368, P197, DOI 10.1126/science.aaw8806
   Lewis PW, 2013, SCIENCE, V340, P857, DOI 10.1126/science.1232245
   Lewis PW, 2010, P NATL ACAD SCI USA, V107, P14075, DOI 10.1073/pnas.1008850107
   Long MP, 2019, NUCLEIC ACIDS RES, V47, P8399, DOI 10.1093/nar/gkz547
   Lowe BR, 2019, CANCERS, V11, DOI 10.3390/cancers11050660
   Lu C, 2016, SCIENCE, V352, P844, DOI 10.1126/science.aac7272
   Maehara K, 2015, EPIGENET CHROMATIN, V8, DOI 10.1186/s13072-015-0027-3
   Margueron R, 2011, NATURE, V469, P343, DOI 10.1038/nature09784
   Martire S, 2020, NAT REV MOL CELL BIO, V21, P522, DOI 10.1038/s41580-020-0262-8
   Martire S, 2019, NAT GENET, V51, P941, DOI 10.1038/s41588-019-0428-5
   Marzluff WF, 2002, GENOMICS, V80, P487, DOI 10.1006/geno.2002.6850
   Marzluff WF, 2008, NAT REV GENET, V9, P843, DOI 10.1038/nrg2438
   Maze I, 2015, NEURON, V87, P77, DOI 10.1016/j.neuron.2015.06.014
   Maze I, 2014, NAT REV GENET, V15, P259, DOI 10.1038/nrg3673
   McKay DJ, 2015, DEV CELL, V32, P373, DOI 10.1016/j.devcel.2014.12.025
   McKittrick E, 2004, P NATL ACAD SCI USA, V101, P1525, DOI 10.1073/pnas.0308092100
   Meers MP, 2017, ELIFE, V6, DOI 10.7554/eLife.23249
   Mohammad F, 2017, NAT MED, V23, P483, DOI 10.1038/nm.4293
   Muhire BM, 2019, SCI REP-UK, V9, DOI 10.1038/s41598-019-44800-4
   Mukai J, 2019, NEURON, V104, P471, DOI 10.1016/j.neuron.2019.09.014
   Musselman CA, 2012, NAT STRUCT MOL BIOL, V19, P1218, DOI 10.1038/nsmb.2436
   Nacev BA, 2019, NATURE, V567, P473, DOI 10.1038/s41586-019-1038-1
   Nadal S, 2018, CURR OPIN CHEM BIOL, V45, P35, DOI 10.1016/j.cbpa.2018.02.004
   Nagaraja S, 2019, MOL CELL, V76, P965, DOI 10.1016/j.molcel.2019.08.030
   Nakanishi S, 2008, NAT STRUCT MOL BIOL, V15, P881, DOI 10.1038/nsmb.1454
   Nutzmann HW, 2013, APPL ENVIRON MICROB, V79, P6102, DOI 10.1128/AEM.01578-13
   O'Carroll D, 2001, MOL CELL BIOL, V21, P4330, DOI 10.1128/MCB.21.13.4330-4336.2001
   Ow JR, 2016, SCI REP-UK, V6, DOI 10.1038/srep34163
   Pasini D, 2004, EMBO J, V23, P4061, DOI 10.1038/sj.emboj.7600402
   Pasini D, 2007, MOL CELL BIOL, V27, P3769, DOI 10.1128/MCB.01432-06
   Pchelintsev NA, 2013, CELL REP, V3, P1012, DOI 10.1016/j.celrep.2013.03.026
   Pengelly AR, 2013, SCIENCE, V339, P698, DOI 10.1126/science.1231382
   Piunti A, 2017, NAT MED, V23, P493, DOI 10.1038/nm.4296
   Pradeepa MM, 2016, NAT GENET, V48, P681, DOI 10.1038/ng.3550
   Rada-Iglesias A, 2011, NATURE, V470, P279, DOI 10.1038/nature09692
   Raisner R, 2018, CELL REP, V24, P1722, DOI 10.1016/j.celrep.2018.07.041
   Rickels R, 2017, NAT GENET, V49, P1647, DOI 10.1038/ng.3965
   Saha A, 2006, NAT REV MOL CELL BIO, V7, P437, DOI 10.1038/nrm1945
   Sarthy JF, 2020, ELIFE, V9, DOI [10.7554/elife.61090, 10.7554/eLife.61090]
   Schenk R, 2011, CHROMOSOMA, V120, P275, DOI 10.1007/s00412-011-0310-4
   Schmitges FW, 2011, MOL CELL, V42, P330, DOI 10.1016/j.molcel.2011.03.025
   Schneider R, 2004, NAT CELL BIOL, V6, P73, DOI 10.1038/ncb1076
   Schwartzentruber J, 2012, NATURE, V482, P226, DOI [10.1038/nature10833, 10.1007/s13311-012-0137-6]
   Sen P, 2015, GENE DEV, V29, P1362, DOI 10.1101/gad.263707.115
   Shah MA, 2014, EPIGENET CHROMATIN, V7, DOI 10.1186/1756-8935-7-29
   Shen XH, 2008, MOL CELL, V32, P491, DOI 10.1016/j.molcel.2008.10.016
   Shi LL, 2018, J MOL BIOL, V430, P1562, DOI 10.1016/j.jmb.2018.04.014
   Silveira AB, 2019, ACTA NEUROPATHOL, V137, P637, DOI 10.1007/s00401-019-01975-4
   Singh R, 2018, NUCLEIC ACIDS RES, V46, P8665, DOI 10.1093/nar/gky768
   Sitbon D, 2020, NAT COMMUN, V11, DOI 10.1038/s41467-020-15084-4
   Smith MM, 1998, METHODS, V15, P269, DOI 10.1006/meth.1998.0631
   Stafford JM, 2018, SCI ADV, V4, DOI 10.1126/sciadv.aau5935
   Tang MCW, 2015, PLOS GENET, V11, DOI 10.1371/journal.pgen.1004964
   Tang MCW, 2013, GENESIS, V51, P142, DOI 10.1002/dvg.22366
   Udugama M, 2015, NUCLEIC ACIDS RES, V43, P10227, DOI 10.1093/nar/gkv847
   Vladoiu MC, 2019, NATURE, V572, P67, DOI 10.1038/s41586-019-1158-7
   Voon HPJ, 2018, NAT COMMUN, V9, DOI 10.1038/s41467-018-05607-5
   Wang XD, 2008, MOL CELL BIOL, V28, P227, DOI 10.1128/MCB.01245-07
   Wang ZB, 2008, NAT GENET, V40, P897, DOI 10.1038/ng.154
   Weinberg DN, 2017, CSH PERSPECT MED, V7, DOI 10.1101/cshperspect.a026443
   White RH, 2012, BIOCHEMISTRY-US, V51, P8173, DOI 10.1021/bi300872t
   Wiedemann SM, 2010, J CELL BIOL, V190, P777, DOI 10.1083/jcb.201002043
   Wu G, 2012, NAT GENET, V44, P251, DOI 10.1038/ng.1102
   Xiong CY, 2018, BMC BIOL, V16, DOI 10.1186/s12915-018-0573-9
   Yadav RK, 2017, ELIFE, V6, DOI 10.7554/eLife.27406
   Yan J, 2018, CELL RES, V28, P204, DOI 10.1038/cr.2018.1
   Yuan W, 2011, J BIOL CHEM, V286, P7983, DOI 10.1074/jbc.M110.194027
   Yuen BTK, 2013, CANCER CELL, V24, P567, DOI 10.1016/j.ccr.2013.09.015
   Zhang TT, 2020, GENOME BIOL, V21, DOI 10.1186/s13059-020-01957-w
   Zhang TY, 2015, EMBO REP, V16, P1467, DOI 10.15252/embr.201540945
   Zhang WM, 2019, DEV CELL, V48, P406, DOI 10.1016/j.devcel.2018.11.047
   Zhou BR, 2012, J MOL BIOL, V421, P30, DOI 10.1016/j.jmb.2012.04.032
NR 156
TC 1
Z9 1
U1 1
U2 6
PU MDPI
PI BASEL
PA ST ALBAN-ANLAGE 66, CH-4052 BASEL, SWITZERLAND
EI 2073-4409
J9 CELLS-BASEL
JI Cells
PD DEC
PY 2020
VL 9
IS 12
AR 2716
DI 10.3390/cells9122716
PG 22
WC Cell Biology
WE Science Citation Index Expanded (SCI-EXPANDED)
SC Cell Biology
GA PJ6JH
UT WOS:000601870900001
PM 33353064
OA Green Published, gold
DA 2022-04-10
ER

PT J
AU Pakkiriswami, S
   Natarajan, S
   Nagarajan, U
AF Pakkiriswami, Shanmugasundaram
   Natarajan, Sampath
   Nagarajan, Usha
TI Crumbs top and 'Notch'ed bottom in tumours
SO CURRENT SCIENCE
LA English
DT Review
DE Epidermal-growth-factor repeats; glycosyl-transferases; membrane-bound
   proteins; tumorigenesis; xylosylation
ID EPITHELIAL-CELL POLARITY; CANCER; PROTEINS; MUTATIONS; DOMAIN;
   IDENTIFICATION; MODULATION; SYSTEM; SITES; LOCUS
AB Membrane-bound proteins integrate and coordinate various signalling activities to maintain tissue architecture. In recent years, research updates indicate that these proteins undergo post-translational modification like glycosylation to maintain tissue integrity. Here we discuss research updates from Drosophila, about two essential membrane-bound proteins, Notch and Crumbs, that undergo such modifications to interact with each other and their implications in tumorigenesis.
C1 [Pakkiriswami, Shanmugasundaram] Dalhousie Univ, Dalhousie Med, Dept Biochem & Mol Biol, St John, NB E2L 4L5, Canada.
   [Natarajan, Sampath] SASTRA Univ, Sch Chem & Biotechnol, Chem Biol Lab, Thanjavur 613401, India.
   [Nagarajan, Usha] Cent Univ Haryana, Dept Biochem, Mahendergarh 123029, India.
RP Natarajan, S (corresponding author), SASTRA Univ, Sch Chem & Biotechnol, Chem Biol Lab, Thanjavur 613401, India.; Nagarajan, U (corresponding author), Cent Univ Haryana, Dept Biochem, Mahendergarh 123029, India.
EM sams76@gmail.com; usha@cuh.ac.in
OI Nagarajan, Usha/0000-0001-8482-4012
FU Science and Engineering Research Board, Department of Science and
   Technology, Government of India [YSS/2014/000896, CRG/2018/003725,
   YSS/2014/000223]
FX We thank the Science and Engineering Research Board, Department of
   Science and Technology, Government of India for research grants to U.N.
   (YSS/2014/000896 and CRG/2018/003725) and S.N. (YSS/2014/000223). We
   also thank Dr Arumugam R. Jayakumar (MD Anderson Cancer Centre, Texas,
   USA) for a critical reading of the manuscript.
CR Antfolk D, 2019, BBA-MOL CELL RES, V1866, DOI 10.1016/j.bbamcr.2019.07.002
   Baron M, 2017, MOL MEMBR BIOL, V34, P33, DOI 10.1080/09687688.2018.1503742
   Bergstralh DT, 2012, ESSAYS BIOCHEM, V53, P129, DOI [10.1042/BSE0530129, 10.1042/bse0530129]
   Bray SJ, 2006, NAT REV MOL CELL BIO, V7, P678, DOI 10.1038/nrm2009
   Cordle J, 2008, NAT STRUCT MOL BIOL, V15, P849, DOI 10.1038/nsmb.1457
   Das S, 2018, BIOL OPEN, V7, DOI [10.1242/bio.0314350, 10.1242/bio.031435]
   del Alamo D, 2011, CURR BIOL, V21, pR40, DOI 10.1016/j.cub.2010.10.034
   Ellenbroek SIJ, 2012, SEMIN CANCER BIOL, V22, P208, DOI 10.1016/j.semcancer.2012.02.012
   Etienne-Manneville S, 2008, ONCOGENE, V27, P6970, DOI 10.1038/onc.2008.347
   Frappaolo A, 2018, FRONT GENET, V9, DOI 10.3389/fgene.2018.00436
   Gordon WR, 2008, J CELL SCI, V121, P3109, DOI 10.1242/jcs.035683
   Herranz H, 2006, EMBO REP, V7, P297, DOI 10.1038/sj.embor.7400617
   Hori K, 2013, J CELL SCI, V126, P2135, DOI 10.1242/jcs.127308
   Jin G, 2014, ONCOL LETT, V8, P594, DOI 10.3892/ol.2014.2197
   Kakuda S, 2017, DEV CELL, V40, P193, DOI 10.1016/j.devcel.2016.12.013
   Koles K, 2007, GLYCOBIOLOGY, V17, P1388, DOI 10.1093/glycob/cwm097
   Kumichel A, 2015, TRAFFIC, V16, P604, DOI 10.1111/tra.12273
   Laprise P, 2011, J BIOMED BIOTECHNOL, DOI 10.1155/2011/868217
   Lee TV, 2017, PLOS GENET, V13, DOI 10.1371/journal.pgen.1006723
   Li K, 2008, J BIOL CHEM, V283, P8046, DOI 10.1074/jbc.M800170200
   Li P, 2017, ONCOGENESIS, V6, DOI 10.1038/oncsis.2017.24
   Li PP, 2015, INT J BIOL SCI, V11, P31, DOI 10.7150/ijbs.10615
   Li ZJ, 2017, NAT COMMUN, V8, DOI 10.1038/s41467-017-00255-7
   Lin WH, 2015, CANCER INFORM, V14, P15, DOI 10.4137/CIN.S18964
   Liu J, 2016, CRIT REV ONCOL HEMAT, V104, P21, DOI 10.1016/j.critrevonc.2016.05.010
   Lobry C, 2011, J EXP MED, V208, P1931, DOI 10.1084/jem.20111855
   Malecki MJ, 2006, MOL CELL BIOL, V26, P4642, DOI 10.1128/MCB.01655-05
   Martin-Belmonte F, 2012, NAT REV CANCER, V12, P23, DOI 10.1038/nrc3169
   Nemetschke L, 2016, DEVELOPMENT, V143, P4543, DOI 10.1242/dev.141762
   Nowell CS, 2017, NAT REV CANCER, V17, P145, DOI 10.1038/nrc.2016.145
   Ntziachristos P, 2014, CANCER CELL, V25, P318, DOI 10.1016/j.ccr.2014.02.018
   Ohata S, 2011, NEURON, V69, P215, DOI 10.1016/j.neuron.2010.12.026
   Pakkiriswami S, 2016, FRONT ONCOL, V6, DOI 10.3389/fonc.2016.00037
   Pellissier LP, 2013, PLOS GENET, V9, DOI 10.1371/journal.pgen.1003976
   Ramkumar N, 2015, PLOS GENET, V11, DOI 10.1371/journal.pgen.1005551
   Richardson ECN, 2010, DEVELOPMENT, V137, P641, DOI 10.1242/dev.041913
   TEPASS U, 1990, ROUX ARCH DEV BIOL, V199, P189, DOI 10.1007/BF01682078
   TEPASS U, 1990, CELL, V61, P787, DOI 10.1016/0092-8674(90)90189-L
   Vermezovic J, 2015, NAT STRUCT MOL BIOL, V22, P417, DOI 10.1038/nsmb.3013
   Weisshuhn PC, 2016, STRUCTURE, V24, P555, DOI 10.1016/j.str.2016.02.010
   Weng AP, 2004, SCIENCE, V306, P269, DOI 10.1126/science.1102160
   WHARTON KA, 1985, CELL, V43, P567, DOI 10.1016/0092-8674(85)90229-6
   Yuan X, 2015, CANCER LETT, V369, P20, DOI 10.1016/j.canlet.2015.07.048
   Zielinska DF, 2012, MOL CELL, V46, P542, DOI 10.1016/j.molcel.2012.04.031
NR 44
TC 0
Z9 0
U1 2
U2 2
PU INDIAN ACAD SCIENCES
PI BANGALORE
PA C V RAMAN AVENUE, SADASHIVANAGAR, P B #8005, BANGALORE 560 080, INDIA
SN 0011-3891
J9 CURR SCI INDIA
JI Curr. Sci.
PD NOV 25
PY 2021
VL 121
IS 10
BP 1297
EP 1301
DI 10.18520/cs/v121/i10/1297-1301
PG 5
WC Multidisciplinary Sciences
WE Science Citation Index Expanded (SCI-EXPANDED)
SC Science & Technology - Other Topics
GA XD0DM
UT WOS:000722380400010
OA gold
DA 2022-04-10
ER

PT J
AU Wang, R
   Zhou, Y
   Chen, TB
   Zhou, M
   Wang, L
   Shaw, C
AF Wang, Ran
   Zhou, Yu
   Chen, Tianbao
   Zhou, Mei
   Wang, Lei
   Shaw, Chris
TI Identification and Functional Analysis of a Novel Tryptophyllin Peptide
   from the Skin of the Red-eye Leaf Frog, Agalychnis callidryas
SO INTERNATIONAL JOURNAL OF BIOLOGICAL SCIENCES
LA English
DT Article
DE Agalychnis callidryas; proline-rich peptide; bradykinin antagonist;
   anticancer effect; myotropic activities
ID BRADYKININ-RELATED peptide; AMPHIBIAN SKIN; ANTIMICROBIAL peptide;
   SECRETIONS; RECEPTORS; CANCER; PRECURSOR; ANURANS; GROWTH; CELLS
AB this is especially true of members of the Phyllomedusinae subfamily of frogs native to South and Central America. Tryptophyllins are a group of peptide mainly found in the skin of members of this genus. In this study, a novel tryptophyllin (TPH) type 3 peptide, named AcT-3, has been isolated and structurally-characterised from the skin secretion and lyophilised skin extract of the red-eye leaf frog, Agalychnis callidryas. The peptide was identified in and purified from the skin secretion by reverse-phase HPLC. MALDI-TOF mass spectrometry and MS/MS fragmentation sequencing established its primary structure as: pGlu-Gly-Lys-Pro-Tyr-Trp-Pro-Pro-Pro-Phe-Leu-Pro-Glu, with a non-protonated molecular mass of 1538.19Da. The mature peptide possessed the canonical N-terminal pGlu residue that arises from post-translational modification of a Gln residue. The deduced open-reading frame consisted of 63 amino acid residues encoding a highly-conserved signal peptide of approximately 22 amino acid residues, an intervening acidic spacer peptide domain, a single AcT-3 encoding domain and a C terminal processing site. A synthetic replicate of AcT-3 was found to antagonise the effect of BK on rat tail artery smooth muscle and to contract the intestinal smooth muscle preparations. It was also found that AcT-3 could dose-dependently inhibit the proliferation of human prostate cancer cell lines after 72h incubation.
C1 [Wang, Ran] Tianjin Med Univ, Sch Pharm, Tianjin Key Lab Technol Enabling Dev Clin Therape, Tianjin 300070, Peoples R China.
   [Wang, Ran; Zhou, Yu; Chen, Tianbao; Zhou, Mei; Wang, Lei; Shaw, Chris] Queens Univ, Ctr Med Biol, Sch Pharm, Belfast BT9 7BL, Antrim, North Ireland.
   [Zhou, Yu] Huaqiao Univ, Sch Biomed Sci, Xiamen 361021, Fujian, Peoples R China.
   [Zhou, Yu] Huaqiao Univ, Inst Mol Med, Xiamen 361021, Fujian, Peoples R China.
RP Wang, R (corresponding author), Tianjin Med Univ, Sch Pharm, Tianjin Key Lab Technol Enabling Dev Clin Therape, Tianjin 300070, Peoples R China.
EM wangran@tijmu.edu.cn
OI Wang, Lei/0000-0002-8811-8489
FU National Natural Science Foundation of ChinaNational Natural Science
   Foundation of China (NSFC) [81402901]; Tianjin Education Commission of
   China [20120136]; China Postdoctoral Science FoundationChina
   Postdoctoral Science Foundation [2014M551035]
FX This work was supported by a grant from National Natural Science
   Foundation of China (No. 81402901), Tianjin Education Commission of
   China (No. 20120136) and China Postdoctoral Science Foundation (No.
   2014M551035).
CR Amiche M, 2008, peptide, V29, P2074, DOI 10.1016/j.peptide.2008.06.017
   Apponyi MA, 2004, peptide, V25, P1035, DOI 10.1016/j.peptide.2004.03.006
   Barki-Harrington L, 2003, BIOCHEM J, V371, P581, DOI 10.1042/BJ20021708
   BARRA D, 1995, TRENDS BIOTECHNOL, V13, P205, DOI 10.1016/S0167-7799(00)88947-7
   BEVINS CL, 1990, ANNU REV BIOCHEM, V59, P395, DOI 10.1146/annurev.biochem.59.1.395
   Bowie JH, 2006, HANDBOOK OF BIOLOGICALLY ACTIVE peptide, P283, DOI 10.1016/B978-012369442-3/50046-5
   Brand GD, 2006, peptide, V27, P2137, DOI 10.1016/j.peptide.2006.04.020
   Chen TB, 2005, REGUL peptide, V129, P103, DOI 10.1016/j.regpep.2005.01.017
   Chinchar VG, 2004, VIROLOGY, V323, P268, DOI 10.1016/j.virol.2004.02.029
   Clarke BT, 1997, BIOL REV, V72, P365, DOI 10.1017/S0006323197005045
   Conlon JM, 2005, GEN COMP ENDOCR, V143, P193, DOI 10.1016/j.ygcen.2005.04.006
   ELKAN E, 1968, J ZOOL, V155, P19
   ERSPAMER V, 1985, peptide, V6, P7, DOI 10.1016/0196-9781(85)90343-2
   ERSPAMER V, 1986, COMP BIOCHEM PHYS C, V85, P125, DOI 10.1016/0742-8413(86)90063-0
   Ge L, 2014, THESCIENTIFICWORLDJO, V2014
   GIBSON BW, 1986, J BIOL CHEM, V261, P5341
   Gomes A, 2007, INDIAN J EXP BIOL, V45, P579
   Kokontis JM, 2005, PROSTATE, V65, P287, DOI 10.1002/pros.20285
   Langsdorf M, 2010, RAPID COMMUN MASS SP, V24, P2885, DOI 10.1002/rcm.4717
   Li JX, 2007, MOL CELL PROTEOMICS, V6, P882, DOI 10.1074/mcp.M600334-MCP200
   Mignogna G, 1996, PROTEIN SCI, V5, P357
   MONTECUCCHI PC, 1985, peptide, V6, P187, DOI 10.1016/0196-9781(85)90373-0
   Nascimento ACC, 2003, PROTEIN PEPTIDE LETT, V10, P227, DOI 10.2174/0929866033478933
   Papandreou CN, 1998, NAT MED, V4, P50, DOI 10.1038/nm0198-050
   Rajkumar T, 2001, CURR SCI INDIA, V81, P535
   Rates B, 2011, TOXICON, V57, P35, DOI 10.1016/j.toxicon.2010.09.010
   Ruiz-Carranza Pedro M., 1996, Revista de la Academia Colombiana de Ciencias Exactas Fisicas y Naturales, V20, P365
   Savage JM, 2002, AMPHIBIANS REPTILES, P122
   Srinivasan D, 2004, BRIT J PHARMACOL, V142, P297, DOI 10.1038/sj.bjp.0705757
   Stewart JM, 2002, CAN J PHYSIOL PHARM, V80, P275, DOI 10.1139/Y02-030
   Taub JS, 2003, CANCER RES, V63, P2037
   TOLEDO RC, 1995, COMP BIOCHEM PHYS A, V111, P1, DOI 10.1016/0300-9629(95)98515-I
   Umekita Y, 1996, P NATL ACAD SCI USA, V93, P11802, DOI 10.1073/pnas.93.21.11802
   VanCompernolle SE, 2005, J VIROL, V79, P11598, DOI 10.1128/JVI.79.18.11598-11606.2005
   Vanhoye D, 2003, EUR J BIOCHEM, V270, P2068, DOI 10.1046/j.1432-1033.2003.03584.x
   Wang L, 2009, peptide, V30, P1557, DOI 10.1016/j.peptide.2009.04.019
NR 36
TC 8
Z9 8
U1 1
U2 20
PU IVYSPRING INT PUBL
PI LAKE HAVEN
PA PO BOX 4546, LAKE HAVEN, NSW 2263, AUSTRALIA
SN 1449-2288
J9 INT J BIOL SCI
JI Int. J. Biol. Sci.
PY 2015
VL 11
IS 2
BP 209
EP 219
DI 10.7150/ijbs.10143
PG 11
WC Biochemistry & Molecular Biology; Biology
WE Science Citation Index Expanded (SCI-EXPANDED)
SC Biochemistry & Molecular Biology; Life Sciences & Biomedicine - Other
   Topics
GA CC5OP
UT WOS:000350408200009
PM 25561903
OA Green Submitted, gold, Green Published
DA 2022-04-10
ER

PT J
AU Bonecchi, R
   Galliera, E
   Borroni, EM
   Corsi, MM
   Locati, M
   Mantovani, A
AF Bonecchi, Raffaella
   Galliera, Emanuela
   Borroni, Elena M.
   Corsi, Massimiliano M.
   Locati, Massimo
   Mantovani, Alberto
TI Chemokines and chemokine receptors: an overview
SO FRONTIERS IN BIOSCIENCE-LANDMARK
LA English
DT Article
DE Chemokine; Chemokine Receptor; Inflammation; Review
ID CUTTING EDGE; CC-CHEMOKINE; IMMUNE-RESPONSE; CXC CHEMOKINES; D6;
   INFLAMMATION; EXPRESSION; DECOY; SYSTEM; CANCER
AB Chemokines are chemotactic cytokines orchestrating leukocyte recruitment in physiological and pathological conditions. This complex system includes 42 molecules and 19 receptors and is subjected to different levels of regulation, including ligand production, post-translational modification and degradation, as well as receptor expression and signaling activity. Here we analyze the chemokine system, with particular attention to available information on clinical situations in which chemokines or their receptors might assume diagnostic value.
C1 [Bonecchi, Raffaella; Borroni, Elena M.; Locati, Massimo; Mantovani, Alberto] Ist Clin Humanitas, IRCCS, I-20089 Rozzano, Italy.
   [Bonecchi, Raffaella; Galliera, Emanuela; Borroni, Elena M.; Corsi, Massimiliano M.; Locati, Massimo; Mantovani, Alberto] Univ Milan, Fac Med, Inst Gen Pathol, I-20133 Milan, Italy.
RP Locati, M (corresponding author), Ist Clin Humanitas, IRCCS, Via Manzoni 56, I-20089 Rozzano, Italy.
EM massimo.locati@humanitas.it
RI bonecchi, raffaella/ABI-2390-2020; Borroni, Elena Monica/O-7241-2019;
   Locati, Massimo/H-8404-2015; Borroni, Elena Monica EM/B-3600-2012;
   Bonecchi, Raffaella/A-3140-2009; Locati, Massimo/ABF-6807-2021;
   Romanelli, Massimiliano M Corsi/K-9359-2016
OI Borroni, Elena Monica/0000-0003-1157-8249; Locati,
   Massimo/0000-0003-3077-590X; Borroni, Elena Monica
   EM/0000-0003-1157-8249; Romanelli, Massimiliano M
   Corsi/0000-0001-7928-7697; Bonecchi, Raffaella/0000-0003-3346-5333;
   Mantovani, Alberto/0000-0001-5578-236X
FU European CommunityEuropean Commission [518167, 512040,
   LSHG-CT-2005005203]; Ministero dell'Istruzione, dell'Universita e della
   RicercaMinistry of Education, Universities and Research (MIUR)
   [2002061255, RBIN04EKCX]; Fondazione CARIPLOFondazione Cariplo; Piano
   Nazionale Ricerche-Biotecnologie Avanzate, tema 2; Italian Association
   for Cancer Research (AIRC)Fondazione AIRC per la ricerca sul cancro;
   FIRC (Federazione Italiana Ricerca Cancro) fellowshipFondazione AIRC per
   la ricerca sul cancro
FX This study was supported by research grants of the European Community
   (INNOCHEM project 518167; EMBIC project 512040; MUGEN project
   LSHG-CT-2005005203), , the Ministero dell'Istruzione, dell'Universita e
   della Ricerca (PRIN project 2002061255; FIRB project RBIN04EKCX),
   Fondazione CARIPLO (NOBEL project), and Piano Nazionale
   Ricerche-Biotecnologie Avanzate, tema 2. This work was conducted in the
   context and with the support of the Fondazione Humanitas per la Ricerca.
   The generous contribution of the Italian Association for Cancer Research
   (AIRC) is gratefully acknowledged. EMB is a recipient of a FIRC
   (Federazione Italiana Ricerca Cancro) fellowship.
CR Alcami A, 2003, NAT REV IMMUNOL, V3, P36, DOI 10.1038/nri980
   Bacon K, 2002, J INTERF CYTOK RES, V22, P1067
   Baggiolini M, 1997, ANNU REV IMMUNOL, V15, P675, DOI 10.1146/annurev.immunol.15.1.675
   Balkwill F, 2004, SEMIN CANCER BIOL, V14, P171, DOI 10.1016/j.semcancer.2003.10.003
   Balkwill F, 2004, NAT REV CANCER, V4, P540, DOI 10.1038/nrc1388
   Bertini R, 2004, P NATL ACAD SCI USA, V101, P11791, DOI 10.1073/pnas.0402090101
   Blease K, 2000, J IMMUNOL, V165, P2603, DOI 10.4049/jimmunol.165.5.2603
   Bonecchi R, 1998, J EXP MED, V187, P129, DOI 10.1084/jem.187.1.129
   Bonecchi R, 2004, J IMMUNOL, V172, P4972, DOI 10.4049/jimmunol.172.8.4972
   Colobran R, 2007, CLIN EXP IMMUNOL, V148, P208, DOI 10.1111/j.1365-2249.2007.03344.x
   D'Amico G, 2000, NAT IMMUNOL, V1, P387, DOI 10.1038/80819
   de la Torre YM, 2007, P NATL ACAD SCI USA, V104, P2319, DOI 10.1073/pnas.0607514104
   Detheux M, 2000, J EXP MED, V192, P1501, DOI 10.1084/jem.192.10.1501
   Fra AM, 2003, J IMMUNOL, V170, P2279, DOI 10.4049/jimmunol.170.5.2279
   Fulkerson PC, 2006, P NATL ACAD SCI USA, V103, P16418, DOI 10.1073/pnas.0607863103
   Galliera E, 2004, J BIOL CHEM, V279, P25590, DOI 10.1074/jbc.M400363200
   Gosling J, 1999, J CLIN INVEST, V103, P773, DOI 10.1172/JCI5624
   HARADA A, 1994, J LEUKOCYTE BIOL, V56, P559, DOI 10.1002/jlb.56.5.559
   Hedrick JA, 1998, BLOOD, V91, P4242, DOI 10.1182/blood.V91.11.4242
   Jamieson T, 2005, NAT IMMUNOL, V6, P403, DOI 10.1038/ni1182
   Jensen KK, 2004, SEMIN CANCER BIOL, V14, P187, DOI 10.1016/j.semcancer.2003.10.005
   Johnson Z, 2005, CYTOKINE GROWTH F R, V16, P625, DOI 10.1016/j.cytogfr.2005.04.006
   Karpus WJ, 1998, J IMMUNOL, V161, P2667
   Kulbe H, 2004, INT J DEV BIOL, V48, P489, DOI 10.1387/ijdb.041814hk
   Lim JK, 2006, TRENDS IMMUNOL, V27, P308, DOI 10.1016/j.it.2006.05.007
   Lira S, 1999, Forum (Genova), V9, P286
   Liu LP, 2006, J IMMUNOL, V177, P17, DOI 10.4049/jimmunol.177.1.17
   Locati M, 1999, ANNU REV MED, V50, P425, DOI 10.1146/annurev.med.50.1.425
   Locati M, 2005, CYTOKINE GROWTH F R, V16, P679, DOI 10.1016/j.cytogfr.2005.05.003
   Locati Massimo, 2005, Am J Clin Pathol, V123 Suppl, pS82
   Lusso P, 2006, EMBO J, V25, P447, DOI 10.1038/sj.emboj.7600947
   Luster AD, 1998, NEW ENGL J MED, V338, P436, DOI 10.1056/NEJM199802123380706
   Ma B, 2006, J IMMUNOL, V176, P4968, DOI 10.4049/jimmunol.176.8.4968
   Mackay CR, 2001, NAT IMMUNOL, V2, P95, DOI 10.1038/84298
   Mantovani A, 1999, IMMUNOL TODAY, V20, P254, DOI 10.1016/S0167-5699(99)01469-3
   Mantovani A, 2004, TRENDS IMMUNOL, V25, P677, DOI 10.1016/j.it.2004.09.015
   Mantovani A, 2006, NAT REV IMMUNOL, V6, P907, DOI 10.1038/nri1964
   Martelli M, 2005, J VISION, V5, P58, DOI 10.1167/5.1.6
   Miller AL, 2006, J IMMUNOL, V176, P2562, DOI 10.4049/jimmunol.176.4.2562
   Murphy PM, 2000, PHARMACOL REV, V52, P145
   Nibbs RJB, 2001, AM J PATHOL, V158, P867, DOI 10.1016/S0002-9440(10)64035-7
   O'Brien SJ, 2000, IMMUNOL REV, V177, P99, DOI 10.1034/j.1600-065X.2000.17710.x
   Perrier P, 2004, J IMMUNOL, V172, P7031, DOI 10.4049/jimmunol.172.11.7031
   Romagnani P, 2004, TRENDS IMMUNOL, V25, P201, DOI 10.1016/j.it.2004.02.006
   Rossi D, 2000, ANNU REV IMMUNOL, V18, P217, DOI 10.1146/annurev.immunol.18.1.217
   Rot A, 2005, CYTOKINE GROWTH F R, V16, P687, DOI 10.1016/j.cytogfr.2005.05.011
   Sallusto F, 2004, CURR OPIN IMMUNOL, V16, P724, DOI 10.1016/j.coi.2004.09.012
   Saunders BM, 2007, IMMUNOL CELL BIOL, V85, P103, DOI 10.1038/sj.icb.7100027
   Sozzani S, 1998, J IMMUNOL, V161, P1083
   Strieter RM, 2005, CYTOKINE GROWTH F R, V16, P593, DOI 10.1016/j.cytogfr.2005.04.007
   Struyf S, 2004, CIRC RES, V95, P855, DOI 10.1161/01.RES.0000146674.38319.07
   Struyf S, 2003, ADV IMMUNOL, V81, P1, DOI 10.1016/S0065-2776(03)81001-5
   Thelen M, 2001, NAT IMMUNOL, V2, P129, DOI 10.1038/84224
   Tsibris AMN, 2007, ANNU REV MED, V58, P445, DOI 10.1146/annurev.med.58.080105.102908
   Weber M, 2004, MOL BIOL CELL, V15, P2492, DOI 10.1091/mbc.E03-09-0634
   Zhou YH, 1998, J IMMUNOL, V160, P4018
   Zlotnik A, 2006, INT J CANCER, V119, P2026, DOI 10.1002/ijc.22024
NR 57
TC 181
Z9 193
U1 0
U2 28
PU BIOSCIENCE RESEARCH INST-BRI
PI SINGAPORE
PA 7 TEMZASEK BLVD, SUNTEC TOWER ONE, SINGAPORE, SINGAPORE
SN 2768-6701
EI 2768-6698
J9 FRONT BIOSCI-LANDMRK
JI Front. Biosci.
PD JAN 1
PY 2009
VL 14
BP 540
EP 551
DI 10.2741/3261
PG 12
WC Biochemistry & Molecular Biology; Cell Biology
WE Science Citation Index Expanded (SCI-EXPANDED)
SC Biochemistry & Molecular Biology; Cell Biology
GA 393DZ
UT WOS:000262352400034
PM 19273084
DA 2022-04-10
ER

PT J
AU Jalkanen, AL
   Coleman, SJ
   Wilusz, J
AF Jalkanen, Aimee L.
   Coleman, Stephen J.
   Wilusz, Jeffrey
TI Determinants and implications of mRNA poly(A) tail size - Does this
   protein make my tail look big?
SO SEMINARS IN CELL & DEVELOPMENTAL BIOLOGY
LA English
DT Review
DE Deadenylation; Poly(A) tail; Polyadenylation; Hyperadenylation; mRNA 3 '
   end processing
ID CYTOPLASMIC POLYADENYLATION ELEMENT; AU-RICH ELEMENTS; BINDING-PROTEIN;
   TRANSLATIONAL REPRESSION; POLY(A)-BINDING PROTEIN; ALTERNATIVE CLEAVAGE;
   NUCLEAR-RNA; 3' ENDS; LENGTH; DEADENYLATION
AB While the phenomenon of polyadenylation has been well-studied, the dynamics of poly(A) tail size and its impact on transcript function and cell biology are less well-appreciated. The goal of this review is to encourage readers to view the poly(A) tail as a dynamic, changeable aspect of a transcript rather than a simple static entity that marks the 3' end of an mRNA. This could open up new angles of regulation in the post-transcriptional control of gene expression throughout development, differentiation and cancer. (C) 2014 Elsevier Ltd. All rights reserved.
C1 [Jalkanen, Aimee L.; Coleman, Stephen J.; Wilusz, Jeffrey] Colorado State Univ, Dept Microbiol Immunol & Pathol, Ft Collins, CO 80523 USA.
RP Wilusz, J (corresponding author), Colorado State Univ, Dept Microbiol Immunol & Pathol, Ft Collins, CO 80523 USA.
EM jeffrey.wilusz@colostate.edu
OI Coleman, Stephen/0000-0001-7686-4866
FU NIHUnited States Department of Health & Human ServicesNational
   Institutes of Health (NIH) - USA [GM072481]; NSFNational Science
   Foundation (NSF) [MCB-1301983]; NATIONAL INSTITUTE OF GENERAL MEDICAL
   SCIENCESUnited States Department of Health & Human ServicesNational
   Institutes of Health (NIH) - USANIH National Institute of General
   Medical Sciences (NIGMS) [R01GM072481] Funding Source: NIH RePORTER;
   OFFICE OF THE DIRECTOR, NATIONAL INSTITUTES OF HEALTHUnited States
   Department of Health & Human ServicesNational Institutes of Health (NIH)
   - USA [T32OD010437] Funding Source: NIH RePORTER
FX Studies on RNA stability and polyadenylation in the Wilusz laboratory
   have been funded by the NIH (GM072481) and NSF (MCB-1301983).
CR Apponi LH, 2010, HUM MOL GENET, V19, P1058, DOI 10.1093/hmg/ddp569
   Bakheet T, 2001, NUCLEIC ACIDS RES, V29, P246, DOI 10.1093/nar/29.1.246
   Barnhart MD, 2013, CELL REP, V5, P909, DOI 10.1016/j.celrep.2013.10.012
   Barreau C, 2005, NUCLEIC ACIDS RES, V33, P7138, DOI 10.1093/nar/gki1012
   Bartel DP, 2009, CELL, V136, P215, DOI 10.1016/j.cell.2009.01.002
   Bear DG, 2003, EXP CELL RES, V286, P332, DOI 10.1016/S0014-4827(03)00123-X
   Beaudoing E, 2000, GENOME RES, V10, P1001, DOI 10.1101/gr.10.7.1001
   Beilharz TH, 2011, METHODS MOL BIOL, V759, P133, DOI 10.1007/978-1-61779-173-4_9
   Beilharz TH, 2009, METHODS, V48, P294, DOI 10.1016/j.ymeth.2009.02.003
   Bhattacharyya SN, 2006, CELL, V125, P1111, DOI 10.1016/j.cell.2006.04.031
   Braun JE, 2011, MOL CELL, V44, P120, DOI 10.1016/j.molcel.2011.09.007
   Bresson SM, 2013, PLOS GENET, V9, DOI 10.1371/journal.pgen.1003893
   BROITMAN SL, 1987, P NATL ACAD SCI USA, V84, P5120, DOI 10.1073/pnas.84.15.5120
   Brooks SA, 2013, BBA-GENE REGUL MECH, V1829, P666, DOI 10.1016/j.bbagrm.2013.02.003
   Brown JA, 2012, P NATL ACAD SCI USA, V109, P19202, DOI 10.1073/pnas.1217338109
   Chang H, 2014, MOL CELL, V53, P1044, DOI 10.1016/j.molcel.2014.02.007
   Charlesworth A, 2000, DEV BIOL, V227, P706, DOI 10.1006/dbio.2000.9922
   Charlesworth A, 2013, WIRES RNA, V4, P437, DOI 10.1002/wrna.1171
   Chen CYA, 2011, WIRES RNA, V2, P167, DOI 10.1002/wrna.40
   CHEN F, 1995, NUCLEIC ACIDS RES, V23, P2614, DOI 10.1093/nar/23.14.2614
   Chen F, 1998, NUCLEIC ACIDS RES, V26, P2891, DOI 10.1093/nar/26.12.2891
   Choi YH, 2003, P NATL ACAD SCI USA, V100, P7033, DOI 10.1073/pnas.1232347100
   Chowdhury A, 2012, RNA, V18, P936, DOI 10.1261/rna.029876.111
   Conrad NK, 2014, WIRES RNA, V5, P15, DOI 10.1002/wrna.1194
   Damgaard Christian Kroun, 2013, Cancer Treat Res, V158, P153, DOI 10.1007/978-3-642-31659-3_7
   DARNELL JE, 1971, SCIENCE, V174, P507, DOI 10.1126/science.174.4008.507
   Das Gupta J, 1998, RNA, V4, P766
   Djuranovic S, 2012, SCIENCE, V336, P237, DOI 10.1126/science.1215691
   Ebert MS, 2010, CURR BIOL, V20, pR858, DOI 10.1016/j.cub.2010.08.052
   Eckmann CR, 2011, WIRES RNA, V2, P348, DOI 10.1002/wrna.56
   Elkon R, 2013, NAT REV GENET, V14, P496, DOI 10.1038/nrg3482
   Eulalio A, 2009, RNA, V15, P21, DOI 10.1261/rna.1399509
   Fabian MR, 2013, NAT STRUCT MOL BIOL, V20, P735, DOI 10.1038/nsmb.2572
   FOX CA, 1989, GENE DEV, V3, P2151, DOI 10.1101/gad.3.12b.2151
   Fuke H, 2008, NUCLEIC ACIDS RES, V36, P1037, DOI 10.1093/nar/gkm1120
   Funakoshi Y, 2007, GENE DEV, V21, P3135, DOI 10.1101/gad.1597707
   Gohin M, 2013, MOL HUM REPROD
   Gu HD, 1999, P NATL ACAD SCI USA, V96, P8943, DOI 10.1073/pnas.96.16.8943
   Gu HD, 2003, NUCLEIC ACIDS RES, V31, P6264, DOI 10.1093/nar/gkg823
   Hilleren P, 2001, RNA, V7, P753, DOI 10.1017/S1355838201010147
   Huntzinger E, 2011, NAT REV GENET, V12, P99, DOI 10.1038/nrg2936
   Imesch P, 2011, GYNECOL OBSTET INVES, V72, P43, DOI 10.1159/000322395
   Janicke A, 2012, RNA, V18, P1289, DOI 10.1261/rna.031898.111
   Jensen TH, 2001, MOL CELL, V7, P887, DOI 10.1016/S1097-2765(01)00232-5
   Jing Q, 2005, CELL, V120, P623, DOI 10.1016/j.cell.2004.12.038
   Kamasawa Masami, 2008, In Silico Biology, V8, P347
   Kelly SM, 2014, RNA, V20, P681, DOI 10.1261/rna.043984.113
   Kim JH, 2007, GENE DEV, V21, P2571, DOI 10.1101/gad.1593007
   Kini HK, 2014, MOL CELL BIOL, V34, P1300, DOI 10.1128/MCB.01683-13
   Kojima S, 2012, GENE DEV, V26, P2724, DOI 10.1101/gad.208306.112
   Kondrashov A, 2012, RNA, V18, P2236, DOI 10.1261/rna.032391.112
   Kuhn U, 2009, J BIOL CHEM, V284, P22803, DOI 10.1074/jbc.M109.018226
   Kumar GR, 2010, MOL CELL BIOL, V30, P4996, DOI 10.1128/MCB.00600-10
   Lai WS, 2003, MOL CELL BIOL, V23, P3798, DOI 10.1128/MCB.23.11.3798-3812.2003
   Lykke-Andersen J, 2005, GENE DEV, V19, P351, DOI 10.1101/gad.1282305
   Ma WJ, 1997, NUCLEIC ACIDS RES, V25, P3564, DOI 10.1093/nar/25.18.3564
   Makeyev AV, 2002, RNA, V8, P265, DOI 10.1017/S1355838202024627
   Malecki M, 2013, EMBO J, V32, P1842, DOI 10.1038/emboj.2013.63
   Meijer HA, 2007, NUCLEIC ACIDS RES, V35, DOI 10.1093/nar/gkm830
   Millevoi S, 2002, EMBO REP, V3, P869, DOI 10.1093/embo-reports/kvf173
   Millevoi S, 2010, NUCLEIC ACIDS RES, V38, P2757, DOI 10.1093/nar/gkp1176
   Moraes KCM, 2006, RNA, V12, P1084, DOI 10.1261/rna.59606
   Morales J, 1997, J BIOL CHEM, V272, P6607, DOI 10.1074/jbc.272.10.6607
   Mukherjee D, 2002, EMBO J, V21, P165, DOI 10.1093/emboj/21.1.165
   Murray EL, 2008, METHOD ENZYMOL, V448, P483, DOI 10.1016/S0076-6879(08)02624-4
   Natalizio BJ, 2013, TRENDS CELL BIOL, V23, P365, DOI 10.1016/j.tcb.2013.03.006
   Nunes NM, 2010, EMBO J, V29, P1523, DOI 10.1038/emboj.2010.42
   Paillard L, 2000, MECH DEVELOP, V93, P117, DOI 10.1016/S0925-4773(00)00279-3
   Palaniswamy V, 2006, NAT STRUCT MOL BIOL, V13, P429, DOI 10.1038/nsmb1080
   Park E, 2013, WIRES RNA, V4, P423, DOI 10.1002/wrna.1168
   Patil DP, 2014, METHODS MOL BIOL, V1125, P13, DOI 10.1007/978-1-62703-971-0_2
   Peng SSY, 1998, EMBO J, V17, P3461, DOI 10.1093/emboj/17.12.3461
   Preiss T, 1998, RNA, V4, P1321, DOI 10.1017/S1355838298980669
   Proudfoot NJ, 2011, GENE DEV, V25, P1770, DOI 10.1101/gad.17268411
   Rao MN, 1996, NUCLEIC ACIDS RES, V24, P4078, DOI 10.1093/nar/24.20.4078
   Rattenbacher B, 2010, MOL CELL BIOL, V30, P3970, DOI 10.1128/MCB.00624-10
   Reveal B, 2010, DEV CELL, V18, P496, DOI 10.1016/j.devcel.2009.12.021
   Richter JD, 2007, TRENDS BIOCHEM SCI, V32, P279, DOI 10.1016/j.tibs.2007.04.004
   Rutledge CE, 2014, PLOS ONE, V9, DOI 10.1371/journal.pone.0088385
   Sagawa F, 2011, EMBO J, V30, P3994, DOI 10.1038/emboj.2011.272
   Sakakibara S, 2002, P NATL ACAD SCI USA, V99, P15194, DOI 10.1073/pnas.232087499
   Salles FJ, 1999, METHODS, V17, P38, DOI 10.1006/meth.1998.0705
   Schmid M, 2008, TRENDS BIOCHEM SCI, V33, P501, DOI 10.1016/j.tibs.2008.07.003
   Schmidt K, 2013, WIRES RNA, V4, P217, DOI 10.1002/wrna.1155
   Schoenberg DR, 2012, NAT REV GENET, V13, P246, DOI 10.1038/nrg3160
   Scorilas A, 2002, CRIT REV CL LAB SCI, V39, P193, DOI 10.1080/10408360290795510
   Sement FM, 2013, NUCLEIC ACIDS RES, V41, P7115, DOI 10.1093/nar/gkt465
   SIMON R, 1994, MOL CELL BIOL, V14, P7867, DOI 10.1128/MCB.14.12.7867
   SIPPEL AE, 1974, P NATL ACAD SCI USA, V71, P4635, DOI 10.1073/pnas.71.11.4635
   Soucek S, 2012, BBA-GENE REGUL MECH, V1819, P546, DOI 10.1016/j.bbagrm.2012.03.006
   Su YF, 2012, PLOS ONE, V7, DOI 10.1371/journal.pone.0034250
   Subtelny AO, 2014, NATURE, V508, P66, DOI 10.1038/nature13007
   Svitkin YV, 2013, PLOS BIOL, V11, DOI 10.1371/journal.pbio.1001564
   Tay Y, 2014, NATURE, V505, P344, DOI 10.1038/nature12986
   Thomadaki H, 2008, CANCER CHEMOTH PHARM, V61, P251, DOI 10.1007/s00280-007-0467-y
   Tian B, 2005, NUCLEIC ACIDS RES, V33, P201, DOI 10.1093/nar/gki158
   Tian B, 2013, TRENDS BIOCHEM SCI, V38, P312, DOI 10.1016/j.tibs.2013.03.005
   Tian B, 2012, WIRES RNA, V3, P385, DOI 10.1002/wrna.116
   Udagawa T, 2012, MOL CELL, V47, P253, DOI 10.1016/j.molcel.2012.05.016
   Vlasova-St Louis I, 2014, J INTERF CYTOK RES, V34, P233, DOI 10.1089/jir.2013.0108
   Wang ZR, 1999, MOL CELL BIOL, V19, P4552
   Weill L, 2012, NAT STRUCT MOL BIOL, V19, P577, DOI 10.1038/nsmb.2311
   Wells SE, 1998, MOL CELL, V2, P135, DOI 10.1016/S1097-2765(00)80122-7
   Wigington CP, 2014, WILEY INTERDISCIP RE
   Wilusz JE, 2012, GENE DEV, V26, P2392, DOI 10.1101/gad.204438.112
   Wu HY, 2013, PLOS ONE, V8, DOI 10.1371/journal.pone.0070548
   Wu LG, 2006, P NATL ACAD SCI USA, V103, P4034, DOI 10.1073/pnas.0510928103
   Yang L, 2011, GENOME BIOL, V12, DOI 10.1186/gb-2011-12-2-r16
   Zekri L, 2013, EMBO J, V32, P1052, DOI 10.1038/emboj.2013.44
   Zhang XK, 2010, CELL CYCLE, V9, P4437, DOI 10.4161/cc.9.22.13887
   Zhao J, 1999, MICROBIOL MOL BIOL R, V63, P405, DOI 10.1128/MMBR.63.2.405-445.1999
   Zheng D, 2014, TRENDS BIOCHEM SCI, V39, P255, DOI 10.1016/j.tibs.2014.04.002
   ZHOURAVLEVA G, 1995, EMBO J, V14, P4065, DOI 10.1002/j.1460-2075.1995.tb00078.x
   Zhu H, 2007, J BIOL CHEM, V282, P2203, DOI 10.1074/jbc.M609349200
NR 114
TC 55
Z9 56
U1 6
U2 30
PU ACADEMIC PRESS LTD- ELSEVIER SCIENCE LTD
PI LONDON
PA 24-28 OVAL RD, LONDON NW1 7DX, ENGLAND
SN 1084-9521
J9 SEMIN CELL DEV BIOL
JI Semin. Cell Dev. Biol.
PD OCT
PY 2014
VL 34
BP 24
EP 32
DI 10.1016/j.semcdb.2014.05.018
PG 9
WC Cell Biology; Developmental Biology
WE Science Citation Index Expanded (SCI-EXPANDED)
SC Cell Biology; Developmental Biology
GA AP4YN
UT WOS:000342086700005
PM 24910447
OA Green Accepted
DA 2022-04-10
ER

PT J
AU Wang, M
   Casey, PJ
AF Wang, Mei
   Casey, Patrick J.
TI Isoprenylcysteine carboxylmethyltransferase as a target for development
   of novel cancer therapeutics
SO DRUGS OF THE FUTURE
LA English
DT Review
ID ISOPRENYLATED PROTEIN METHYLTRANSFERASE; VIRUS-RNA REPLICATION;
   DEPENDENT CELL-GROWTH; CARBOXYL METHYLTRANSFERASE; A-FACTOR;
   FARNESYLTRANSFERASE inhibitor; RHO-GTPASES; FARNESYLCYSTEINE ANALOGS;
   TRANSFERASE inhibitor; MEMBRANE LOCALIZATION
AB Isoprenylcysteine carboxylmethyltransferase (lcmt), which catalyzes the last step of the three-step post-translational modification of a group of proteins containing the so-called CaaX motif, has become the focus of research in the quest for discovering new and more effective cancer therapies. lcmt is the only enzyme that performs carboxyl methylation of isoprenoid-modified proteins, termed prenyl proteins, and hence is of crucial importance in this processing pathway. Substrates of lcmt include not only most members of the well-known Ras GTPase superfamily of proteins, but also a host of other proteins that have functional roles in important aspects of biological regulation. Efforts to assess the impact of lcmt inhibitor on tumorigenesis in particular increased after protein farnesyltransferase inhibitor (FTIs) performed below expectation in solid tumors. A selective small-molecule inhibitor of lcmt termed cysmethynil has recently been described which significantly inhibits transformed cell growth and triggers cell death. The precise mechanism by which lcmt inhibition results in antiproliferative responses, in particular which of its many substrates are involved, remain unclear and are presently being examined. inhibitor of lcmt have the potential not only for the treatment of cancer, but also other diseases related to aberrant function of CaaX proteins, including inflammatory diseases such as rheumatoid arthritis.
C1 Duke NUS, Grad Sch Med, Singapore 169547, Singapore.
RP Casey, PJ (corresponding author), Duke NUS, Grad Sch Med, 2 Jalan Bukit Merah, Singapore 169547, Singapore.
EM patrick.casey@gms.edu.sg
OI Casey, Patrick/0000-0002-7366-9309; Wang, Mei/0000-0001-6887-6840
CR Adjei AA, 2001, JNCI-J NATL CANCER I, V93, P1062, DOI 10.1093/jnci/93.14.1062
   ANDEREGG RJ, 1988, J BIOL CHEM, V263, P18236
   Anderson JL, 2005, J BIOL CHEM, V280, P29454, DOI 10.1074/jbc.M504982200
   Anderson JL, 2005, J BIOL CHEM, V280, P7336, DOI 10.1074/jbc.M410292200
   Ashby MN, 1998, CURR OPIN LIPIDOL, V9, P99, DOI 10.1097/00041433-199804000-00004
   Baron Rudi A., 2004, BMC Biochemistry, V5, P19, DOI 10.1186/1471-2091-5-19
   Bergo MO, 2004, J CLIN INVEST, V113, P539, DOI 10.1172/JCI200418829
   Bergo MO, 2002, MOL CELL BIOL, V22, P171, DOI 10.1128/MCB.22.1.171-181.2002
   Bergo MO, 2000, J BIOL CHEM, V275, P17605, DOI 10.1074/jbc.C000079200
   Bergo MO, 2001, J BIOL CHEM, V276, P5841, DOI 10.1074/jbc.C000831200
   BOS JL, 1989, CANCER RES, V49, P4682
   Boyartchuk VL, 1998, GENETICS, V150, P95
   CASEY PJ, 1989, P NATL ACAD SCI USA, V86, P8323, DOI 10.1073/pnas.86.21.8323
   Casey PJ, 1996, J BIOL CHEM, V271, P5289, DOI 10.1074/jbc.271.10.5289
   Chiang PK, 1996, FASEB J, V10, P471, DOI 10.1096/fasebj.10.4.8647346
   Cox AD, 2002, CURR OPIN PHARMACOL, V2, P388, DOI 10.1016/S1471-4892(02)00181-9
   Dai Q, 1998, J BIOL CHEM, V273, P15030, DOI 10.1074/jbc.273.24.15030
   DING JB, 1994, J BIOL CHEM, V269, P16837
   Doll RJ, 2004, CURR OPIN DRUG DISC, V7, P478
   Droge W, 2002, PHYSIOL REV, V82, P47, DOI 10.1152/physrev.00018.2001
   GLOMSET JA, 1994, ANNU REV CELL BIOL, V10, P181, DOI 10.1146/annurev.cellbio.10.1.181
   GLOMSET JA, 1990, TRENDS BIOCHEM SCI, V15, P139, DOI 10.1016/0968-0004(90)90213-U
   Gotlib Jason, 2005, Curr Hematol Rep, V4, P77
   Greenwood J, 2003, FASEB J, V17, P905, DOI 10.1096/fj.02-1014fje
   Haklai R, 1998, BIOCHEMISTRY-US, V37, P1306, DOI 10.1021/bi972032d
   HANCOCK JF, 1989, CELL, V57, P1167, DOI 10.1016/0092-8674(89)90054-8
   HRYCYNA CA, 1991, EMBO J, V10, P1699, DOI 10.1002/j.1460-2075.1991.tb07694.x
   Huang CY, 2004, EXPERT OPIN THER PAT, V14, P175, DOI 10.1517/eotp.14.2.175.26401
   Imai Y, 1997, MOL CELL BIOL, V17, P1543, DOI 10.1128/MCB.17.3.1543
   Jaffe AB, 2002, ADV CANCER RES, V84, P57, DOI 10.1016/S0065-230X(02)84003-9
   JAMES GL, 1995, J BIOL CHEM, V270, P6221, DOI 10.1074/jbc.270.11.6221
   KATO K, 1992, P NATL ACAD SCI USA, V89, P6403, DOI 10.1073/pnas.89.14.6403
   Kim E, 1999, J BIOL CHEM, V274, P8383, DOI 10.1074/jbc.274.13.8383
   Kramer K, 2003, MOL BIOL CELL, V14, P848, DOI 10.1091/mbc.E02-07-0390
   Lebowitz PF, 1998, ONCOGENE, V17, P1439, DOI 10.1038/sj.onc.1202175
   Lin X, 2002, GASTROENTEROLOGY, V123, P345, DOI 10.1053/gast.2002.34279
   Lu Q, 2004, CIRC RES, V94, P306, DOI 10.1161/01.RES.0000113923.85084.C1
   MA YT, 1994, BIOCHEMISTRY-US, V33, P5414, DOI 10.1021/bi00184a009
   Magee Anthony I, 2003, Biochem J, V376, pe3, DOI 10.1042/BJ20031531
   Magee T, 2005, CURR OPIN CELL BIOL, V17, P190, DOI 10.1016/j.ceb.2005.02.003
   Malumbres M, 2003, NAT REV CANCER, V3, P459, DOI 10.1038/nrc1097
   MARCIANO D, 1995, J MED CHEM, V38, P1267, DOI 10.1021/jm00008a004
   MAROM M, 1995, J BIOL CHEM, V270, P22263, DOI 10.1074/jbc.270.38.22263
   MARR RS, 1990, J BIOL CHEM, V265, P20057
   Mazieres J, 2004, CANCER LETT, V206, P159, DOI 10.1016/j.canlet.2003.08.033
   Michaelson D, 2005, MOL BIOL CELL, V16, P1606, DOI 10.1091/mbc.E04-11-0960
   Otto JC, 1999, J BIOL CHEM, V274, P8379, DOI 10.1074/jbc.274.13.8379
   Park HJ, 2002, CIRC RES, V91, P143, DOI 10.1161/01.RES.0000028149.15986.4C
   Pruitt K, 2001, CANCER LETT, V171, P1, DOI 10.1016/S0304-3835(01)00528-6
   Reid TS, 2004, J MOL BIOL, V343, P417, DOI 10.1016/j.jmb.2004.08.056
   Sahai E, 2002, NAT REV CANCER, V2, P133, DOI 10.1038/nrc725
   SCHAFER WR, 1990, SCIENCE, V249, P1133, DOI 10.1126/science.2204115
   SCHEER A, 1993, FEBS LETT, V319, P110, DOI 10.1016/0014-5793(93)80047-X
   Schmidt WK, 1998, P NATL ACAD SCI USA, V95, P11175, DOI 10.1073/pnas.95.19.11175
   Sebti SM, 2000, ONCOGENE, V19, P6584, DOI 10.1038/sj.onc.1204146
   SHI YQ, 1992, J BIOL CHEM, V267, P9547
   SILVIUS JR, 1994, BIOCHEMISTRY-US, V33, P3014, DOI 10.1021/bi00176a034
   Sivakumar B, 2004, JAMA-J AM MED ASSOC, V292, P972, DOI 10.1001/jama.292.8.972
   SMELAND TE, 1994, P NATL ACAD SCI USA, V91, P10712, DOI 10.1073/pnas.91.22.10712
   Takahashi K, 2005, J BIOL CHEM, V280, P32768, DOI 10.1074/jbc.M506280200
   VOLKER C, 1991, J BIOL CHEM, V266, P21515
   Walters CE, 2002, J IMMUNOL, V168, P4087, DOI 10.4049/jimmunol.168.8.4087
   Wang CF, 2005, MOL CELL, V18, P425, DOI 10.1016/j.molcel.2005.04.004
   Wang H, 1997, J BIOL CHEM, V272, P25380, DOI 10.1074/jbc.272.40.25380
   Whyte DB, 1997, J BIOL CHEM, V272, P14459, DOI 10.1074/jbc.272.22.14459
   Winter-Vann AM, 2005, NAT REV CANCER, V5, P405, DOI 10.1038/nrc1612
   Winter-Vann AM, 2005, P NATL ACAD SCI USA, V102, P4336, DOI 10.1073/pnas.0408107102
   Winter-Vann AM, 2003, P NATL ACAD SCI USA, V100, P6529, DOI 10.1073/pnas.1135239100
   Ye J, 2003, P NATL ACAD SCI USA, V100, P15865, DOI 10.1073/pnas.2237238100
   Zhang FL, 1996, ANNU REV BIOCHEM, V65, P241, DOI 10.1146/annurev.bi.65.070196.001325
NR 70
TC 1
Z9 1
U1 0
U2 1
PU PROUS SCIENCE, SA
PI BARCELONA
PA PO BOX 540, PROVENZA 388, 08025 BARCELONA, SPAIN
SN 0377-8282
J9 DRUG FUTURE
JI Drug Future
PD MAY
PY 2006
VL 31
IS 5
BP 437
EP 445
DI 10.1358/dof.2006.031.05.994707
PG 9
WC Pharmacology & Pharmacy
WE Science Citation Index Expanded (SCI-EXPANDED)
SC Pharmacology & Pharmacy
GA 080QA
UT WOS:000240261400008
DA 2022-04-10
ER

PT J
AU Byrne, G
   Freeley, M
   Feighery, C
   Whelan, A
   Long, A
AF Byrne, Greg
   Freeley, Michael
   Feighery, Con
   Whelan, Alex
   Long, Aideen
TI Protein kinase C delta is a substrate of tissue transglutaminase and a
   novel autoantigen in coeliac disease
SO CLINICAL IMMUNOLOGY
LA English
DT Article
DE Coeliac disease; Autoantibodies; Tissue transglutaminase; Protein kinase
   C delta
ID IGA ANTIBODIES; CANCER CELLS; APOPTOSIS; AUTOANTIBODIES; ACTIN; MICE;
   AUTOIMMUNITY; ENZYME; DEATH; BETA
AB Post-translational modification of proteins by deamidation or transamidation by tissue transglutaminase (tTG) has been suggested as a possible mechanism for the development of autoimmunity. Sequence analysis of protein kinase C delta (PKC delta) identified an amino acid motif that suggested the possibility that PKC delta was a glutamine substrate of tTG and MALDI-TOF analysis of synthesised peptide from PKC delta proved that this was the case. Polymerisation experiments using recombinant tTG and biotinylated hexapeptide substrate incorporation assays demonstrated that PKC delta is a substrate for tTG-mediated transamidation. Elevated levels of anti-PKG delta antibodies were detected in sera from patients with coeliac disease (p<0.0001) but not from patients with other autoimmune disorders. These data suggest that a subset of patients with coeliac disease produce autoantibodies against PKC delta and that this response may stem from a tTG PKC delta substrate interaction. (C) 2013 Elsevier Inc. All rights reserved.
C1 [Byrne, Greg] Dublin Inst Technol, Sch Biol Sci, Dublin 8, Ireland.
   [Freeley, Michael; Long, Aideen] Trinity Coll Dublin, Inst Mol Med, Dept Clin Med, Dublin 8, Ireland.
   [Feighery, Con; Whelan, Alex] St James Hosp, Dept Immunol, Dublin, Ireland.
   [Feighery, Con; Whelan, Alex] Trinity Coll Dublin, Dublin 8, Ireland.
RP Byrne, G (corresponding author), Dublin Inst Technol, Sch Biol Sci, Dublin 8, Ireland.
EM greg.byrne@dit.ie
OI Byrne, Greg/0000-0001-9081-1760; Freeley, Michael/0000-0002-5763-6582
CR Boros S, 2004, FEBS LETT, V576, P57, DOI 10.1016/j.febslet.2004.08.062
   Cecil DL, 2008, J IMMUNOL, V180, P8378, DOI 10.4049/jimmunol.180.12.8378
   Ciccocioppo R, 2010, INT J IMMUNOPATH PH, V23, P179, DOI 10.1177/039463201002300116
   Ciccocioppo R, 2001, AM J CLIN PATHOL, V115, P494
   Clemente MG, 2004, AM J GASTROENTEROL, V99, P1551, DOI 10.1111/j.1572-0241.2004.30296.x
   Clemente MG, 2003, GASTROENTEROLOGY, V124, pA660, DOI 10.1016/S0016-5085(03)83343-7
   Fesus L, 2005, FEBS LETT, V579, P3297, DOI 10.1016/j.febslet.2005.03.063
   Fesus L, 2002, TRENDS BIOCHEM SCI, V27, P534, DOI 10.1016/S0968-0004(02)02182-5
   Freeley M, 2011, CELL SIGNAL, V23, P753, DOI 10.1016/j.cellsig.2010.10.013
   Granito A, 2004, CLIN EXP IMMUNOL, V137, P386, DOI 10.1111/j.1365-2249.2004.02541.x
   Griffin M, 2002, BIOCHEM J, V368, P377, DOI 10.1042/BJ20021234
   Hasegawa G, 2003, BIOCHEM J, V373, P793, DOI 10.1042/BJ20021084
   Huang LH, 2010, NEPHROL DIAL TRANSPL, V25, P3897, DOI 10.1093/ndt/gfq291
   Koning F, 2012, SEMIN IMMUNOPATHOL, V34, P541, DOI 10.1007/s00281-012-0321-0
   Korponay-Szabo IR, 2003, GUT, V52, P199, DOI 10.1136/gut.52.2.199
   Lasagni D, 1999, ACTA PAEDIATR, V88, P462, DOI 10.1080/08035259950169882
   Lindfors K, 2012, EXPERT OPIN THER TAR, V16, P665, DOI 10.1517/14728222.2012.688808
   Lytton SD, 2013, CLIN CHIM ACTA, V415, P346, DOI 10.1016/j.cca.2012.10.051
   Matthias T, 2010, CLIN REV ALLERG IMMU, V38, P298, DOI 10.1007/s12016-009-8160-z
   Miyamoto A, 2002, NATURE, V416, P865, DOI 10.1038/416865a
   Moss SF, 1996, GUT, V39, P811, DOI 10.1136/gut.39.6.811
   Nemes Z, 1997, J BIOL CHEM, V272, P20577, DOI 10.1074/jbc.272.33.20577
   Ozpolat B, 2007, AUTOPHAGY, V3, P480, DOI 10.4161/auto.4349
   Pavlyukov MS, 2012, BIOCHEM BIOPH RES CO, V421, P773, DOI 10.1016/j.bbrc.2012.04.082
   Piacentini M, 1999, IMMUNOL TODAY, V20, P130, DOI 10.1016/S0167-5699(98)01416-9
   Qiao SW, 2012, SEMIN IMMUNOPATHOL, V34, P523, DOI 10.1007/s00281-012-0314-z
   Reyland ME, 2007, BIOCHEM SOC T, V35, P1001, DOI 10.1042/BST0351001
   Sarang Z, 2005, HEPATOLOGY, V42, P578, DOI 10.1002/hep.20812
   Shao WH, 2011, ARTHRITIS RES THER, V13, DOI 10.1186/ar3206
   Shaoul R, 2007, AUTOIMMUN REV, V6, P559, DOI 10.1016/j.autrev.2007.02.006
   Sollid LM, 1997, GUT, V41, P851, DOI 10.1136/gut.41.6.851
   Szondy Z, 2003, P NATL ACAD SCI USA, V100, P7812, DOI 10.1073/pnas.0832466100
   Teesalu K, 2001, INT ARCH ALLERGY IMM, V126, P157, DOI 10.1159/000049507
   TEPPO AM, 1984, J IMMUNOL METHODS, V74, P327, DOI 10.1016/0022-1759(84)90300-4
   Tuckova L, 1997, CLIN IMMUNOL IMMUNOP, V85, P289, DOI 10.1006/clin.1997.4429
   Uhlig HH, 2000, EUR J GASTROEN HEPAT, V12, P1017, DOI 10.1097/00042737-200012090-00009
   Vader LW, 2002, J EXP MED, V195, P643, DOI 10.1084/jem.20012028
   Verderio EAM, 2005, PROG EXP TUMOR RES, V38, P89
   Weller SG, 1999, GASTROENTEROLOGY, V117, P848, DOI 10.1016/S0016-5085(99)70343-4
NR 39
TC 3
Z9 3
U1 0
U2 10
PU ACADEMIC PRESS INC ELSEVIER SCIENCE
PI SAN DIEGO
PA 525 B ST, STE 1900, SAN DIEGO, CA 92101-4495 USA
SN 1521-6616
J9 CLIN IMMUNOL
JI Clin. Immunol.
PD APR
PY 2013
VL 147
IS 1
BP 1
EP 8
DI 10.1016/j.clim.2013.01.007
PG 8
WC Immunology
WE Science Citation Index Expanded (SCI-EXPANDED)
SC Immunology
GA 129AG
UT WOS:000317810200001
PM 23454274
OA Green Published
DA 2022-04-10
ER

PT J
AU Garcia-Gimenez, JL
   Garces, C
   Roma-Mateo, C
   Pallardo, FV
AF Garcia-Gimenez, Jose-Luis
   Garces, Concepcion
   Roma-Mateo, Carlos
   Pallardo, Federico, V
TI Oxidative stress-mediated alterations in histone post-translational
   modifications
SO FREE RADICAL BIOLOGY AND MEDICINE
LA English
DT Article
DE Oxidative stress; Histones; epigenetic; Chromatin; Cell cycle; PTM;
   Disease
ID BLOOD MONONUCLEAR-CELLS; HETEROCHROMATIN FOCI; REDOX HOMEOSTASIS;
   cancer cells; CYCLE ARREST; H2A HISTONE; CHROMATIN; GLUTATHIONE; H3;
   ACETYLATION
AB Epigenetic regulation of gene expression provides a finely tuned response capacity for cells when undergoing environmental changes. However, in the context of human physiology or disease, any cellular imbalance that modulates homeostasis has the potential to trigger molecular changes that result either in physiological adaptation to a new situation or pathological conditions. These effects are partly due to alterations in the functionality of epigenetic regulators, which cause long-term and often heritable changes in cell lineages. As such, free radicals resulting from unbalanced/extended oxidative stress have been proved to act as modulators of epigenetic agents, resulting in alterations of the epigenetic landscape. In the present review we will focus on the particular effect that oxidative stress and free radicals produce in histone post-translational modification that contribute to altering the histone code and, consequently, gene expression. The pathological consequences of the changes in this epigenetic layer of regulation of gene expression are thoroughly evidenced by data gathered in many physiological adaptive processes and in human diseases that range from age-related neurodegenerative pathologies to cancer, and that include respiratory syndromes, infertility, and systemic inflammatory conditions like sepsis.
C1 [Garcia-Gimenez, Jose-Luis; Garces, Concepcion; Roma-Mateo, Carlos; Pallardo, Federico, V] Univ Valencia, Fac Med & Dent, INCLIVA, Dept Physiol, Valencia 46010, Spain.
   [Garcia-Gimenez, Jose-Luis; Roma-Mateo, Carlos; Pallardo, Federico, V] Associated Unit Rare Dis INCLIVA CIPF, Valencia, Spain.
   [Garcia-Gimenez, Jose-Luis; Roma-Mateo, Carlos; Pallardo, Federico, V] CIBER Enfermedades Raras CIBERER, Valencia, Spain.
RP Pallardo, FV (corresponding author), Univ Valencia, Fac Med & Dent, Dept Physiol, Av Blasco Ibanez 15, Valencia 46010, Spain.
EM federico.pallardo@uv.es
RI ; Pallardo, Federico/T-1156-2017
OI Garces, Concepcion/0000-0002-9903-511X; Pallardo,
   Federico/0000-0003-3715-1980
FU Ministerio de Economia y Competitividad, Instituto de Salud CarlosIII
   (Spain) through FIS [PI19/01084]; CIBERer (Biomedical Network Research
   Center for Rare Diseases); Generalitat Valenciana (Spain)Generalitat
   Valenciana [PROMETEO/2018/135]; FPU grant from the Spanish Ministerio de
   Ciencia, Innovacion y Universidades
FX J.L. GarciaGimenez and F.V. Pallardo are supported by the Ministerio de
   Economia y Competitividad, Instituto de Salud CarlosIII (Spain) through
   FIS (PI19/01084) and CIBERer (Biomedical Network Research Center for
   Rare Diseases and FVP is founded by a Generalitat Valenciana (Spain)
   [Grant PROMETEO/2018/135] . CG is recipient of a FPU grant from the
   Spanish Ministerio de Ciencia, Innovacion y Universidades.
CR Adams PD, 2007, GENE, V397, P84, DOI 10.1016/j.gene.2007.04.020
   Agostini S, 2015, J CELL MOL MED, V19, P227, DOI 10.1111/jcmm.12442
   Agresta S, 2013, ANN ONCOL, V24, P11
   Akter S, 2018, NAT CHEM BIOL, V14, P995, DOI 10.1038/s41589-018-0116-2
   Alzolibani AA, 2013, CELL IMMUNOL, V284, P154, DOI 10.1016/j.cellimm.2013.07.011
   Arita A, 2012, ENVIRON HEALTH PERSP, V120, P198, DOI 10.1289/ehp.1104140
   Arriagada-Petersen C, 2021, PLATELETS, V32, P507, DOI 10.1080/09537104.2020.1767770
   Ashraf JM, 2014, IUBMB LIFE, V66, P686, DOI 10.1002/iub.1318
   Bal W, 2000, CHEM RES TOXICOL, V13, P616, DOI 10.1021/tx000044l
   Bartling TR, 2009, AM J RESP CELL MOL, V40, P58, DOI 10.1165/rcmb.2007-0464OC
   Baumann T, 2020, NAT IMMUNOL, V21, P555, DOI 10.1038/s41590-020-0666-9
   Bazopoulou D, 2019, NATURE, V576, P301, DOI 10.1038/s41586-019-1814-y
   BERTONCINI CRA, 1995, NUCLEIC ACIDS RES, V23, P2995, DOI 10.1093/nar/23.15.2995
   Biette K.M., 2015, EPIGENETIC TECHNOL A, P425, DOI [10.1016/B978-0- 12-801080-8.00019-3, DOI 10.1016/B978-0-12-801080-8.00019-3]
   Bonisch C, 2012, NUCLEIC ACIDS RES, V40, P10719, DOI 10.1093/nar/gks865
   Bonet-Costa C, 2012, J PROTEOMICS, V75, P4124, DOI 10.1016/j.jprot.2012.05.034
   Bosch-Presegue L, 2011, MOL CELL, V42, P210, DOI 10.1016/j.molcel.2011.02.034
   Cantone L, 2011, ENVIRON HEALTH PERSP, V119, P964, DOI 10.1289/ehp.1002955
   Cebria-Costa JP, 2020, ONCOGENE, V39, P79, DOI 10.1038/s41388-019-0969-1
   Chen DQ, 2018, ENVIRON MOL MUTAGEN, V59, P375, DOI 10.1002/em.22187
   Chen DQ, 2013, J BIOL CHEM, V288, P21678, DOI 10.1074/jbc.M113.476630
   Chen F, 2016, FREE RADICAL BIO MED, V99, P167, DOI 10.1016/j.freeradbiomed.2016.08.003
   Chen ZW, 2014, BRIT J PHARMACOL, V171, P3196, DOI 10.1111/bph.12661
   Choudhuri T, 2005, J BIOL CHEM, V280, P20059, DOI 10.1074/jbc.M410670200
   Chuang JY, 2011, FREE RADICAL BIO MED, V51, P2309, DOI 10.1016/j.freeradbiomed.2011.10.001
   Cianfruglia L, 2019, ANTIOXIDANTS-BASEL, V8, DOI 10.3390/antiox8090382
   Cyr AR, 2011, ANTIOXID REDOX SIGN, V15, P551, DOI 10.1089/ars.2010.3492
   Davies KJA, 1999, IUBMB LIFE, V48, P41, DOI 10.1080/713803463
   De Luca A, 2011, BIOCHEM J, V440, P175, DOI 10.1042/BJ20111333
   Dhar S, 2017, PHILOS T R SOC B, V372, DOI 10.1098/rstb.2016.0284
   Vivancos PD, 2010, PLANT J, V64, P825, DOI 10.1111/j.1365-313X.2010.04371.x
   Vivancos PD, 2010, BIOCHEM J, V431, P169, DOI 10.1042/BJ20100409
   Dixit K, 2011, HUM IMMUNOL, V72, P219, DOI 10.1016/j.humimm.2010.12.004
   Dixit K, 2010, INT J BIOL MACROMOL, V46, P20, DOI 10.1016/j.ijbiomac.2009.10.009
   Doyle K, 2010, J BIOL CHEM, V285, P17417, DOI 10.1074/jbc.M109.089250
   Dupont C, 2009, SEMIN REPROD MED, V27, P351, DOI 10.1055/s-0029-1237423
   Foyer CH, 2018, FREE RADICAL BIO MED, V122, P137, DOI 10.1016/j.freeradbiomed.2018.03.047
   Friso S, 2015, TRANSL RES, V165, P154, DOI 10.1016/j.trsl.2014.06.007
   Galligan JJ, 2018, P NATL ACAD SCI USA, V115, P9228, DOI 10.1073/pnas.1802901115
   Galligan JJ, 2014, J AM CHEM SOC, V136, P11864, DOI 10.1021/ja503604t
   Gaspar-Maia A, 2013, NAT COMMUN, V4, DOI 10.1038/ncomms2582
   Geraldino-Pardilla L, 2017, ARTHRIT CARE RES, V69, P1276, DOI 10.1002/acr.23106
   Gruosso T, 2016, EMBO MOL MED, V8, P527, DOI 10.15252/emmm.201505891
   Guenther MG, 2007, CELL, V130, P77, DOI 10.1016/j.cell.2007.05.042
   Habold C, 2008, J CELL MOL MED, V12, P607, DOI 10.1111/j.1582-4934.2007.00136.x
   Hake SB, 2006, P NATL ACAD SCI USA, V103, P6428, DOI 10.1073/pnas.0600803103
   Halicka HD, 2009, CELL CYCLE, V8, P2233, DOI 10.4161/cc.8.14.8984
   HAMILOS DL, 1989, IMMUNOPHARMACOLOGY, V18, P223, DOI 10.1016/0162-3109(89)90020-9
   Haqqani AS, 2002, J BIOL CHEM, V277, P3614, DOI 10.1074/jbc.M105730200
   Herranz N, 2016, FEBS J, V283, P4263, DOI 10.1111/febs.13922
   Hickok JR, 2013, J BIOL CHEM, V288, P16004, DOI 10.1074/jbc.M112.432294
   Hitchler MJ, 2012, FREE RADICAL BIO MED, V53, P2178, DOI 10.1016/j.freeradbiomed.2012.09.028
   Holownia A, 2014, N-S ARCH PHARMACOL, V387, P271, DOI 10.1007/s00210-013-0942-4
   Holt MV, 2019, J AM SOC MASS SPECTR, V30, P2548, DOI 10.1007/s13361-019-02350-z
   Ito K, 2004, BIOCHEM BIOPH RES CO, V315, P240, DOI 10.1016/j.bbrc.2004.01.046
   Ito K., 2001, FASEB Journal, V15, P1110
   Jiang T, 2007, P NATL ACAD SCI USA, V104, P60, DOI 10.1073/pnas.0606775103
   Kato T, 2009, CANCER RES, V69, P3597, DOI 10.1158/0008-5472.CAN-08-4368
   Kawakami K, 2009, BIOGERONTOLOGY, V10, P415, DOI 10.1007/s10522-008-9176-0
   Khan MA, 2012, SCAND J RHEUMATOL, V41, P426, DOI 10.3109/03009742.2012.698300
   Khan MA, 2014, BIOCHIMIE, V97, P104, DOI 10.1016/j.biochi.2013.09.026
   Khan MA, 2020, PROTEIN PEPTIDE LETT, V27, P989, DOI 10.2174/0929866527666200427213722
   Khan MA, 2017, BIOCHIMIE, V140, P1, DOI 10.1016/j.biochi.2017.06.006
   Khan MA, 2017, AUTOIMMUNITY, V50, P232, DOI 10.1080/08916934.2017.1347643
   Kheir TB, 2010, ESSAYS BIOCHEM, V48, P107, DOI [10.1042/bse0480107, 10.1042/BSE0480107]
   Kim S, 2020, INT J MOL SCI, V21, DOI 10.3390/ijms21114069
   Kimura H, 2001, J CELL BIOL, V153, P1341, DOI 10.1083/jcb.153.7.1341
   Kosar M, 2011, CELL CYCLE, V10, P457, DOI 10.4161/cc.10.3.14707
   Kreuz S, 2016, EPIGENOMICS-UK, V8, P843, DOI 10.2217/epi-2016-0002
   Lee CF, 2013, J PROTEOME RES, V12, P4302, DOI 10.1021/pr400201d
   Liu CL, 2005, PLOS BIOL, V3, P1753, DOI 10.1371/journal.pbio.0030328
   Lo Conte M, 2013, J BIOL CHEM, V288, P26480, DOI 10.1074/jbc.R113.467738
   Lu C, 2012, NATURE, V483, P474, DOI 10.1038/nature10860
   Ludin A, 2014, ANTIOXID REDOX SIGN, V21, P1605, DOI 10.1089/ars.2014.5941
   Garcia-Gimenez JL, 2019, BIOFACTORS, V45, P641, DOI 10.1002/biof.1532
   Garcia-Gimenez JL, 2017, FREE RADICAL BIO MED, V112, P36, DOI 10.1016/j.freeradbiomed.2017.07.008
   Garcia-Gimenez JL, 2013, ANTIOXID REDOX SIGN, V19, P1305, DOI 10.1089/ars.2012.5021
   Garcia-Gimenez JL, 2012, FREE RADICAL BIO MED, V52, P1453, DOI 10.1016/j.freeradbiomed.2012.01.022
   Mahalingaiah PKS, 2017, ONCOTARGET, V8, P11127, DOI 10.18632/oncotarget.12091
   Mahalingaiah PKS, 2015, BREAST CANCER RES TR, V153, P41, DOI 10.1007/s10549-015-3514-0
   Maharana C, 2010, NEUROSCIENCE, V167, P354, DOI 10.1016/j.neuroscience.2010.02.023
   Quinonez-Flores CM, 2016, BIOMED RES INT, V2016, DOI 10.1155/2016/6097417
   Marino-Ramirez L, 2006, PROTEINS, V62, P838, DOI 10.1002/prot.20814
   Markovic J, 2007, J BIOL CHEM, V282, P20416, DOI 10.1074/jbc.M609582200
   Markovic J, 2009, PLOS ONE, V4, DOI 10.1371/journal.pone.0006413
   Marton M, 2018, PLOS ONE, V13, DOI 10.1371/journal.pone.0207949
   Marzluff WF, 2002, GENOMICS, V80, P487, DOI 10.1006/geno.2002.6850
   Marzluff WF, 2008, NAT REV GENET, V9, P843, DOI 10.1038/nrg2438
   Massaad CA, 2011, ANTIOXID REDOX SIGN, V14, P2013, DOI 10.1089/ars.2010.3208
   McManus KJ, 2006, BIOCHEM CELL BIOL, V84, P640, DOI 10.1139/O06-086
   Menon SG, 2007, ONCOGENE, V26, P1101, DOI 10.1038/sj.onc.1209895
   MESSINA JP, 1989, J IMMUNOL, V143, P1974
   Millanes-Romero A, 2013, MOL CELL, V52, P746, DOI 10.1016/j.molcel.2013.10.015
   Mir AR, 2015, PLOS ONE, V10, DOI 10.1371/journal.pone.0136197
   Monks TJ, 2006, DRUG METAB REV, V38, P755, DOI 10.1080/03602530600959649
   Moodie FM, 2004, FASEB J, V18, P1897, DOI 10.1096/fj.04-1506fje
   Nakamura A, 2010, ANN NY ACAD SCI, V1197, P33, DOI 10.1111/j.1749-6632.2009.05374.x
   Nakata S, 2016, BIOCHEM BIOPH RES CO, V472, P46, DOI 10.1016/j.bbrc.2016.02.057
   Nijnik A, 2012, BLOOD, V119, P1370, DOI 10.1182/blood-2011-05-352666
   Niu YM, 2015, FREE RADICAL BIO MED, V82, P22, DOI 10.1016/j.freeradbiomed.2015.01.028
   OBERLEY LW, 1981, MED HYPOTHESES, V7, P21, DOI 10.1016/0306-9877(81)90018-9
   OSLEY MA, 1991, ANNU REV BIOCHEM, V60, P827, DOI 10.1146/annurev.biochem.60.1.827
   Osoata GO, 2009, BIOCHEM BIOPH RES CO, V384, P366, DOI 10.1016/j.bbrc.2009.04.128
   Pal S, 2016, SCI ADV, V2, DOI 10.1126/sciadv.1600584
   Paluvai H, 2020, CELLS-BASEL, V9, DOI 10.3390/cells9020466
   Pan D, 2020, BLOOD ADV, V4, P970, DOI 10.1182/bloodadvances.2019001245
   Park JH, 2016, SCI REP-UK, V6, DOI 10.1038/srep21857
   Park JA, 2011, MOL CELLS, V31, P343, DOI 10.1007/s10059-011-0044-4
   Pasque V, 2011, NUCLEUS-PHILA, V2, P533, DOI 10.4161/nucl.2.6.17799
   Patterson JC, 2019, CELL SYST, V8, P163, DOI 10.1016/j.cels.2019.01.005
   Paulsen CE, 2013, CHEM REV, V113, P4633, DOI 10.1021/cr300163e
   Polytarchou C, 2008, MOL CELL BIOL, V28, P7451, DOI 10.1128/MCB.00688-08
   Rabbani N, 2014, BIOCHEM SOC T, V42, P419, DOI 10.1042/BST20140008
   Raineri S, 2018, FRONT GENET, V9, DOI 10.3389/fgene.2018.00493
   Rajendrasozhan S, 2009, COPD, V6, P291, DOI 10.1080/15412550903049132
   Rasheed Z, 2018, INT J BIOL MACROMOL, V112, P169, DOI 10.1016/j.ijbiomac.2018.01.157
   Rogakou EP, 1998, J BIOL CHEM, V273, P5858, DOI 10.1074/jbc.273.10.5858
   Sadakierska-Chudy A, 2015, NEUROTOX RES, V27, P172, DOI 10.1007/s12640-014-9508-6
   Sampson VB, 2015, PLOS ONE, V10, DOI 10.1371/journal.pone.0142704
   Sanders YY, 2013, REDOX BIOL, V1, P8, DOI 10.1016/j.redox.2012.11.004
   Sautel CF, 2009, MOL MICROBIOL, V71, P212, DOI 10.1111/j.1365-2958.2008.06519.x
   Serra Bardenys G., 2020, MAINTAINING OXIDIZED
   Seto E, 2014, CSH PERSPECT BIOL, V6, DOI 10.1101/cshperspect.a018713
   Shackelford RE, 2000, FREE RADICAL BIO MED, V28, P1387, DOI 10.1016/S0891-5849(00)00224-0
   Shah SG, 2020, EPIGENET CHROMATIN, V13, DOI 10.1186/s13072-020-00354-8
   SHAW JP, 1986, J CELL PHYSIOL, V129, P193, DOI 10.1002/jcp.1041290210
   Shimazu T, 2013, SCIENCE, V339, P211, DOI 10.1126/science.1227166
   Sies H, 2015, REDOX BIOL, V4, P180, DOI 10.1016/j.redox.2015.01.002
   Singh R, 2018, NUCLEIC ACIDS RES, V46, P8665, DOI 10.1093/nar/gky768
   Singh SV, 2004, J BIOL CHEM, V279, P25813, DOI 10.1074/jbc.M313538200
   Skrzydlewska E, 2005, WORLD J GASTROENTERO, V11, P403, DOI 10.3748/wjg.v11.i3.403
   Su M, 2021, EXPERT OPIN DRUG DIS, V16, P745, DOI 10.1080/17460441.2021.1877656
   Sundar IK, 2014, J PROTEOME RES, V13, P982, DOI 10.1021/pr400998n
   Sunil VR, 2017, EXP MOL PATHOL, V102, P50, DOI 10.1016/j.yexmp.2016.12.005
   Tagami H, 2004, CELL, V116, P51, DOI 10.1016/S0092-8674(03)01064-X
   Talbert PB, 2010, NAT REV MOL CELL BIO, V11, P264, DOI 10.1038/nrm2861
   Tomita K, 2003, BIOCHEM BIOPH RES CO, V301, P572, DOI 10.1016/S0006-291X(02)03029-2
   Ullevig SL, 2016, ANTIOXID REDOX SIGN, V25, P836, DOI 10.1089/ars.2015.6531
   Ullrich O, 1999, P NATL ACAD SCI USA, V96, P6223, DOI 10.1073/pnas.96.11.6223
   Valiuliene G, 2015, J CELL MOL MED, V19, P1742, DOI 10.1111/jcmm.12550
   van Bussel BCT, 2017, INT J MOL SCI, V18, DOI 10.3390/ijms18020346
   Vasudevarao MD, 2014, J BIOL CHEM, V289, P7702, DOI 10.1074/jbc.M113.486522
   Xu W, 2011, CANCER CELL, V19, P17, DOI 10.1016/j.ccr.2010.12.014
   Zane L, 2017, MOL BIOL CELL, V28, P2290, DOI 10.1091/mbc.E16-12-0870
   Zhang RG, 2005, DEV CELL, V8, P19, DOI 10.1016/j.devcel.2004.10.019
   Zhang RG, 2007, MOL CELL BIOL, V27, P2343, DOI 10.1128/MCB.02019-06
   Zhao YH, 2017, biomarkersS, V22, P420, DOI 10.1080/1354750X.2016.1203996
   Zhao YM, 2015, CSH PERSPECT BIOL, V7, DOI 10.1101/cshperspect.a025064
   Zhou MW, 2017, J PROTEOME RES, V16, P599, DOI 10.1021/acs.jproteome.6b00694
   Zlatanova J, 2009, STRUCTURE, V17, P160, DOI 10.1016/j.str.2008.12.016
NR 150
TC 9
Z9 9
U1 4
U2 5
PU ELSEVIER SCIENCE INC
PI NEW YORK
PA STE 800, 230 PARK AVE, NEW YORK, NY 10169 USA
SN 0891-5849
EI 1873-4596
J9 FREE RADICAL BIO MED
JI Free Radic. Biol. Med.
PD JUL
PY 2021
VL 170
BP 6
EP 18
DI 10.1016/j.freeradbiomed.2021.02.027
EA JUN 2021
PG 13
WC Biochemistry & Molecular Biology; Endocrinology & Metabolism
WE Science Citation Index Expanded (SCI-EXPANDED)
SC Biochemistry & Molecular Biology; Endocrinology & Metabolism
GA SV4NL
UT WOS:000663797700003
PM 33689846
DA 2022-04-10
ER

PT J
AU Sharma, N
   Pasala, MS
   Prakash, A
AF Sharma, Nidhi
   Pasala, Monica S.
   Prakash, Aishwarya
TI Mitochondrial DNA: epigenetic and environment
SO ENVIRONMENTAL AND MOLECULAR MUTAGENESIS
LA English
DT Review
DE mitochondrial epigenetic; mtDNA methylation; noncoding RNAs;
   mitochondrial post-translational modification; xenobiotics
ID LONG NONCODING RNAS; BASE EXCISION-REPAIR; CPG METHYLATION; VALPROIC
   ACID; TRANSCRIPTION FACTOR; POLYMERASE-GAMMA; gene expression;
   HELA-CELLS; HUMAN TFAM; GENOME
AB Maintenance of the mitochondrial genome is essential for proper cellular function. For this purpose, mitochondrial DNA (mtDNA) needs to be faithfully replicated, transcribed, translated, and repaired in the face of constant onslaught from endogenous and environmental agents. Although only 13 polypeptide are encoded within mtDNA, the mitochondrial proteome comprises over 1500 proteins that are encoded by nuclear genes and translocated to the mitochondria for the purpose of maintaining mitochondrial function. Regulation of mtDNA and mitochondrial proteins by epigenetic changes and post-translational modification facilitate crosstalk between the nucleus and the mitochondria and ultimately lead to the maintenance of cellular health and homeostasis. DNA methyl transferases have been identified in the mitochondria implicating that methylation occurs within this organelle; however, the extent to which mtDNA is methylated has been debated for many years. mechanism of demethylation within this organelle have also been postulated, but the exact mechanism and their outcomes is still an active area of research. Mitochondrial dysfunction in the form of altered gene expression and ATP production, resulting from epigenetic changes, can lead to various conditions including aging-related neurodegenerative disorders, altered metabolism, changes in circadian rhythm, and cancer. Here, we provide an overview of the epigenetic regulation of mtDNA via methylation, long and short noncoding RNAs, and post-translational modification of nucleoid proteins (as mitochondria lack histones). We also highlight the influence of xenobiotics such as airborne environmental pollutants, contamination from heavy metals, and therapeutic drugs on mtDNA methylation. Environ. Mol. Mutagen. 2019. (c) 2019 Wiley Periodicals, Inc.
C1 [Sharma, Nidhi; Pasala, Monica S.; Prakash, Aishwarya] Univ S Alabama, Mitchell Canc Inst, Dept Biochem & Mol Biol, 1660 Springhill Ave, Mobile, AL 36604 USA.
RP Prakash, A (corresponding author), Univ S Alabama, Mitchell Canc Inst, Dept Biochem & Mol Biol, 1660 Springhill Ave, Mobile, AL 36604 USA.
EM aprakash@health.southalabama.edu
RI Sharma, Nidhi/AAR-9456-2021; sharma, nidhi/ABC-4361-2020
OI Sharma, Nidhi/0000-0002-9384-2463; Prakash,
   Aishwarya/0000-0003-1441-6237
FU National Institute of Environmental Health SciencesUnited States
   Department of Health & Human ServicesNational Institutes of Health (NIH)
   - USANIH National Institute of Environmental Health Sciences (NIEHS)
   [1R01ES030084-01, 5R00ES024417-04]; NATIONAL INSTITUTE OF ENVIRONMENTAL
   HEALTH SCIENCESUnited States Department of Health & Human
   ServicesNational Institutes of Health (NIH) - USANIH National Institute
   of Environmental Health Sciences (NIEHS) [R00ES024417, R01ES030084]
   Funding Source: NIH RePORTER
FX Grant sponsor: National Institute of Environmental Health Sciences;
   Grant numbers: 1R01ES030084-01; 5R00ES024417-04.
CR ALONI Y, 1971, J MOL BIOL, V55, P271, DOI 10.1016/0022-2836(71)90197-5
   Armstrong DA, 2016, ENVIRON epigenetic, V2, DOI 10.1093/eep/dvw020
   Asin-Cayuela J, 2007, TRENDS BIOCHEM SCI, V32, P111, DOI 10.1016/j.tibs.2007.01.003
   Baccarelli AA, 2015, CLIN epigenetic, V7, DOI 10.1186/s13148-015-0078-0
   Bai M, 2019, KIDNEY INT, V95, P1389, DOI 10.1016/j.kint.2018.12.028
   Bailey LJ, 2019, NUCLEIC ACIDS RES, V47, P4026, DOI 10.1093/nar/gkz056
   Bailey LJ, 2017, BIOCHEM SOC T, V45, P513, DOI 10.1042/BST20160162
   Bandiera S, 2013, FREE RADICAL BIO MED, V64, P12, DOI 10.1016/j.freeradbiomed.2013.06.013
   Bandiera S, 2011, PLOS ONE, V6, DOI 10.1371/journal.pone.0020746
   Bannister AJ, 2011, CELL RES, V21, P381, DOI 10.1038/cr.2011.22
   Bayraktar G, 2018, FRONT MOL NEUROSCI, V11, DOI 10.3389/fnmol.2018.00169
   Becker T, 2012, TRENDS BIOCHEM SCI, V37, P85, DOI 10.1016/j.tibs.2011.11.004
   Bellizzi D, 2013, DNA RES, V20, P537, DOI 10.1093/dnares/dst029
   Bianchessi V, 2016, MITOCHONDRION, V27, P40, DOI 10.1016/j.mito.2016.02.004
   Bienertova-Vasku J, 2013, CANCER LETT, V336, P1, DOI 10.1016/j.canlet.2013.05.001
   Blanch M, 2016, AM J PATHOL, V186, P385, DOI 10.1016/j.ajpath.2015.10.004
   Bochtler M, 2017, BIOESSAYS, V39, DOI 10.1002/bies.201600178
   BOGENHAGEN DF, 1986, MOL CELL BIOL, V6, P2543, DOI 10.1128/MCB.6.7.2543
   Boovarahan SR, 2018, REV ENVIRON HEALTH, V33, P111, DOI 10.1515/reveh-2017-0025
   Burzio VA, 2009, P NATL ACAD SCI USA, V106, P9430, DOI 10.1073/pnas.0903086106
   Byun HM, 2016, J AM HEART ASSOC, V5, DOI 10.1161/JAHA.116.003218
   Byun HM, 2015, TOXICOLOGY, V328, P152, DOI 10.1016/j.tox.2014.12.019
   Byun HM, 2014, HUM GENET, V133, P247, DOI 10.1007/s00439-013-1417-x
   Byun HM, 2013, PART FIBRE TOXICOL, V10, DOI 10.1186/1743-8977-10-18
   Calvo SE, 2016, NUCLEIC ACIDS RES, V44, pD1251, DOI 10.1093/nar/gkv1003
   Calvo SE, 2010, ANNU REV GENOM HUM G, V11, P25, DOI 10.1146/annurev-genom-082509-141720
   Carrodeguas JA, 2002, J BIOL CHEM, V277, P50008, DOI 10.1074/jbc.M207030200
   Chatterjee A, 2016, CELL, V167, P722, DOI 10.1016/j.cell.2016.09.052
   Chen H, 2012, EUR J PHARMACOL, V690, P51, DOI 10.1016/j.ejphar.2012.06.019
   Chestnut BA, 2011, J NEUROSCI, V31, P16619, DOI 10.1523/JNEUROSCI.1639-11.2011
   Choudhary C, 2009, SCIENCE, V325, P834, DOI 10.1126/science.1175371
   CUMMINGS DJ, 1974, BIOCHIM BIOPHYS ACTA, V374, P1, DOI 10.1016/0005-2787(74)90194-4
   D'Aquila P, 2017, FRONT BIOSCI-LANDMRK, V22, P888, DOI 10.2741/4523
   Das S, 2014, PLOS ONE, V9, DOI 10.1371/journal.pone.0096820
   Das S, 2012, CIRC RES, V110, P1596, DOI 10.1161/CIRCRESAHA.112.267732
   de Souza-Pinto NC, 2009, DNA REPAIR, V8, P704, DOI 10.1016/j.dnarep.2009.01.021
   Dmitrieva NI, 2011, AM J PHYSIOL-REG I, V301, pR632, DOI 10.1152/ajpregu.00853.2010
   Dong YR, 2017, EPIGENET CHROMATIN, V10, DOI 10.1186/s13072-017-0149-x
   Drohat AC, 2016, CHEM REV, V116, P12711, DOI 10.1021/acs.chemrev.6b00191
   Dudek J, 2013, BBA-MOL CELL RES, V1833, P274, DOI 10.1016/j.bbamcr.2012.05.028
   Dzitoyeva S, 2012, NEUROBIOL AGING, V33, P2881, DOI 10.1016/j.neurobiolaging.2012.02.006
   Falkenberg M, 2018, ESSAYS BIOCHEM, V62, P287, DOI 10.1042/EBC20170100
   Fan J, 2014, MOL CELL, V53, P534, DOI 10.1016/j.molcel.2013.12.026
   Fan S, 2019, CANCER RES, V79, P1069, DOI 10.1158/0008-5472.CAN-18-2505
   Fernandez-Millan P, 2015, NUCLEIC ACIDS RES, V43, P4284, DOI 10.1093/nar/gkv189
   Ferreira LL, 2019, FOOD CHEM TOXICOL, V124, P450, DOI 10.1016/j.fct.2018.12.017
   Fetterman JL, 2017, TOXICOLOGY, V391, P18, DOI 10.1016/j.tox.2017.08.002
   Gao S, 2018, MITOCHONDRION, V38, P41, DOI 10.1016/j.mito.2017.08.002
   Garcia-Gomez S, 2013, MOL CELL, V52, P541, DOI 10.1016/j.molcel.2013.09.025
   Ghosh S, 2014, MITOCHONDRION, V18, P58, DOI 10.1016/j.mito.2014.07.007
   GRAY H, 1992, J BIOL CHEM, V267, P5835
   Gray MW, 2012, CSH PERSPECT BIOL, V4, DOI 10.1101/cshperspect.a011403
   Graziewicz MA, 2006, CHEM REV, V106, P383, DOI 10.1021/cr040463d
   GROOT GSP, 1979, BIOCHIM BIOPHYS ACTA, V564, P355, DOI 10.1016/0005-2787(79)90233-8
   He R, 2019, EXP CELL RES, V378, P87, DOI 10.1016/j.yexcr.2019.03.012
   He WJ, 2012, TRENDS ENDOCRIN MET, V23, P467, DOI 10.1016/j.tem.2012.07.004
   Hong EE, 2013, MOL CELL BIOL, V33, P2683, DOI 10.1128/MCB.00220-13
   Huang B, 2014, MOL BIOL REP, V41, P3915, DOI 10.1007/s11033-014-3259-6
   Iyer LM, 2016, BIOESSAYS, V38, P27, DOI 10.1002/bies.201500104
   Jagannathan R, 2015, CIRC-CARDIOVASC GENE, V8, P785, DOI 10.1161/CIRCGENETICS.115.001067
   Jang HS, 2017, GENES-BASEL, V8, DOI 10.3390/genes8060148
   Janssen BG, 2017, J TRANSL MED, V15, DOI 10.1186/s12967-016-1113-4
   Janssen BG, 2015, epigenetic-US, V10, P536, DOI 10.1080/15592294.2015.1048412
   Jia YM, 2015, J AGR FOOD CHEM, V63, P10152, DOI 10.1021/acs.jafc.5b04418
   Jia YM, 2013, PLOS ONE, V8, DOI 10.1371/journal.pone.0063855
   Jin BL, 2013, ADV EXP MED BIOL, V754, P3, DOI 10.1007/978-1-4419-9967-2_1
   Johnson AA, 2000, BIOCHEMISTRY-US, V39, P1702, DOI 10.1021/bi992104w
   Pirola CJ, 2013, GUT, V62, P1356, DOI 10.1136/gutjnl-2012-302962
   Kaguni LS, 2004, ANNU REV BIOCHEM, V73, P293, DOI 10.1146/annurev.biochem.72.121801.161455
   Kaniak-Golik A, 2015, FREE RADICAL BIO MED, V82, P73, DOI 10.1016/j.freeradbiomed.2015.01.013
   Kaufman BA, 2017, DNA REPAIR, V60, pA1, DOI 10.1016/j.dnarep.2017.11.002
   King GA, 2018, NUCLEIC ACIDS RES, V46, P3633, DOI 10.1093/nar/gky204
   KIRNOS M D, 1976, Biokhimiya, V41, P68
   Koh CWQ, 2018, NUCLEIC ACIDS RES, V46, P11659, DOI 10.1093/nar/gky1104
   Korhonen JA, 2004, EMBO J, V23, P2423, DOI 10.1038/sj.emboj.7600257
   Krasich R, 2017, FRONT BIOSCI-LANDMRK, V22, P692, DOI 10.2741/4510
   Kukat C, 2015, P NATL ACAD SCI USA, V112, P11288, DOI 10.1073/pnas.1512131112
   Kukat C, 2011, P NATL ACAD SCI USA, V108, P13534, DOI 10.1073/pnas.1109263108
   Kumarswamy R, 2014, CIRC RES, V114, P1569, DOI 10.1161/CIRCRESAHA.114.303915
   Kurdyukov Sergey, 2016, Biology-Basel, V5, DOI 10.3390/biology5010003
   Kweon SM, 2019, MOL CELL, V74, P1138, DOI 10.1016/j.molcel.2019.03.018
   Landerer E, 2011, CELL ONCOL, V34, P297, DOI 10.1007/s13402-011-0018-8
   Lee SR, 2017, OXID MED CELL LONGEV, V2017, DOI 10.1155/2017/8060949
   Lee YS, 2009, CELL, V139, P312, DOI 10.1016/j.cell.2009.07.050
   LI E, 1992, CELL, V69, P915, DOI 10.1016/0092-8674(92)90611-F
   Li HP, 2016, CIRCULATION, V134, P734, DOI 10.1161/CIRCULATIONAHA.116.023926
   Liao K, 2016, COMP BIOCHEM PHYS B, V193, P25, DOI 10.1016/j.cbpb.2015.11.012
   Lim S, 2016, CELL BIOSCI, V6, DOI 10.1186/s13578-016-0089-3
   Liu BJ, 2016, SCI REP-UK, V6, DOI 10.1038/srep23421
   Liu J, 2015, NUCLEIC ACIDS RES, V43, P5476, DOI 10.1093/nar/gkv472
   Lu B, 2013, MOL CELL, V49, P121, DOI 10.1016/j.molcel.2012.10.023
   Lyko F, 2018, NAT REV GENET, V19, P81, DOI 10.1038/nrg.2017.80
   MacFarlane LA, 2010, CURR GENOMICS, V11, P537, DOI 10.2174/138920210793175895
   Madeddu G, 2017, J MED VIROL, V89, P1208, DOI 10.1002/jmv.24742
   Maekawa M, 2004, CLIN CHEM, V50, P1480, DOI 10.1373/clinchem.2004.035139
   Maresca A, 2015, FRONT GENET, V6, DOI 10.3389/fgene.2015.00090
   Martin SA, 2010, CANCER CELL, V17, P235, DOI 10.1016/j.ccr.2009.12.046
   Mason PA, 2003, NUCLEIC ACIDS RES, V31, P1052, DOI 10.1093/nar/gkg167
   Matsuda S, 2018, SCI REP-UK, V8, DOI 10.1038/s41598-018-24251-z
   Matsui M, 2017, NAT REV DRUG DISCOV, V16, P167, DOI 10.1038/nrd.2016.117
   Matsuoka S, 2007, SCIENCE, V316, P1160, DOI 10.1126/science.1140321
   Mattick JS, 2006, HUM MOL GENET, V15, pR17, DOI 10.1093/hmg/ddl046
   Mechta M, 2017, FRONT GENET, V8, DOI 10.3389/fgene.2017.00166
   Mercer TR, 2013, NAT STRUCT MOL BIOL, V20, P300, DOI 10.1038/nsmb.2480
   Milenkovic D, 2013, HUM MOL GENET, V22, P1983, DOI 10.1093/hmg/ddt051
   Morera S, 2012, NUCLEIC ACIDS RES, V40, P9917, DOI 10.1093/nar/gks714
   Mposhi A, 2017, FRONT BIOSCI-LANDMRK, V22, P1099, DOI 10.2741/4535
   NASS MMK, 1973, J MOL BIOL, V80, P155, DOI 10.1016/0022-2836(73)90239-8
   Nicholls TJ, 2018, TRENDS BIOCHEM SCI, V43, P869, DOI 10.1016/j.tibs.2018.08.007
   Nobre F, 1978, Arq Bras Cardiol, V31, P181
   Noh JH, 2016, GENE DEV, V30, P1224, DOI 10.1101/gad.276022.115
   Okano M, 1999, CELL, V99, P247, DOI 10.1016/S0092-8674(00)81656-6
   Olavarria J.V., 2018, MITOCHONDRIAL DNA NE, V9, DOI [10.5772/intechopen.75453, DOI 10.5772/INTECHOPEN.75453]
   Owa C, 2018, PLOS ONE, V13, DOI 10.1371/journal.pone.0192722
   POLLACK Y, 1984, NUCLEIC ACIDS RES, V12, P4811, DOI 10.1093/nar/12.12.4811
   Prakash A, 2015, J CELL BIOCHEM, V116, P1490, DOI 10.1002/jcb.25103
   Prasad R, 2017, DNA REPAIR, V60, P77, DOI 10.1016/j.dnarep.2017.10.011
   Rackham O, 2011, RNA, V17, P2085, DOI 10.1261/rna.029405.111
   Ramchandran R, 2017, ADV EXP MED BIOL, V983, P81, DOI 10.1007/978-981-10-4310-9_6
   REIS RJS, 1983, J BIOL CHEM, V258, P9078
   Ro S, 2013, CELL RES, V23, P759, DOI 10.1038/cr.2013.37
   Rubio-Cosials A, 2011, NAT STRUCT MOL BIOL, V18, P1281, DOI 10.1038/nsmb.2160
   Sage JM, 2010, J BIOL CHEM, V285, P18984, DOI 10.1074/jbc.M109.099846
   Saini SK, 2017, SCI REP-UK, V7, DOI 10.1038/s41598-017-01743-y
   Saki M, 2017, FREE RADICAL BIO MED, V107, P216, DOI 10.1016/j.freeradbiomed.2016.11.050
   Sanyal T, 2018, TOXICOLOGY, V408, P54, DOI 10.1016/j.tox.2018.06.012
   Sas-Chen A, 2017, BIOCHEM SOC T, V45, P51, DOI 10.1042/BST20160131
   Savoia M, 2019, FASEB J, V33, P4107, DOI 10.1096/fj.201800788R
   Schomacher L, 2016, NAT STRUCT MOL BIOL, V23, P116, DOI 10.1038/nsmb.3151
   Shepherd DL, 2017, J MOL CELL CARDIOL, V110, P15, DOI 10.1016/j.yjmcc.2017.06.012
   Shock LS, 2011, P NATL ACAD SCI USA, V108, P3630, DOI 10.1073/pnas.1012311108
   Shokolenko IN, 2017, FRONT BIOSCI-LANDMRK, V22, P835, DOI 10.2741/4520
   Shutt TE, 2006, TRENDS GENET, V22, P90, DOI 10.1016/j.tig.2005.11.007
   Silva MFB, 2008, J INHERIT METAB DIS, V31, P205, DOI 10.1007/s10545-008-0841-x
   Singh B, 2015, PLOS ONE, V10, DOI 10.1371/journal.pone.0140409
   Slyvka A, 2017, SCI REP-UK, V7, DOI 10.1038/s41598-017-07458-4
   Srinivasan H, 2015, CAN J PHYSIOL PHARM, V93, P855, DOI 10.1139/cjpp-2014-0500
   Sripada L, 2012, PLOS ONE, V7, DOI 10.1371/journal.pone.0044873
   Stimpfel M, 2018, STEM CELL REV REP, V14, P13, DOI 10.1007/s12015-017-9771-z
   Stingone JA, 2014, ENVIRON HEALTH PERSP, V122, P863, DOI 10.1289/ehp.1307289
   STORRIE B, 1973, J CELL BIOL, V56, P819, DOI 10.1083/jcb.56.3.819
   Suarez J, 2008, AM J PHYSIOL-CELL PH, V295, pC1561, DOI 10.1152/ajpcell.00076.2008
   Sykora P, 2017, MOL CELL BIOL, V37, DOI 10.1128/MCB.00237-17
   van der Wijst MGP, 2017, SCI REP-UK, V7, DOI 10.1038/s41598-017-00263-z
   VANYUSHIN BF, 1976, MOL BIOL+, V10, P715
   VANYUSHIN BF, 1971, FEBS LETT, V15, P313, DOI 10.1016/0014-5793(71)80646-4
   VANYUSHIN BF, 1977, BIOCHIM BIOPHYS ACTA, V475, P323, DOI 10.1016/0005-2787(77)90023-5
   Vaschetto LM, 2018, RNA BIOL, V15, P826, DOI 10.1080/15476286.2018.1451722
   Vendramin R, 2017, EMBO J, V36, P1123, DOI 10.15252/embj.201695546
   Vidaurre S, 2014, J BIOL CHEM, V289, P27182, DOI 10.1074/jbc.M114.558841
   Villegas J, 2007, NUCLEIC ACIDS RES, V35, P7336, DOI 10.1093/nar/gkm863
   Wakae K, 2018, SCI REP-UK, V8, DOI 10.1038/s41598-018-27930-z
   Wang G, 2010, CELL, V142, P456, DOI 10.1016/j.cell.2010.06.035
   Wang LL, 2017, ELECTRON J QUAL THEO, P1, DOI 10.14232/ejqtde.2017.1.12
   Wang YS, 2006, J BIOL CHEM, V281, P25791, DOI 10.1074/jbc.M604501200
   Wei JW, 2017, ONCOL REP, V37, P3, DOI 10.3892/or.2016.5236
   Wisnovsky S, 2016, NAT CHEM BIOL, V12, P567, DOI [10.1038/NCHEMBIO.2102, 10.1038/nchembio.2102]
   Woischnik M, 2002, GENOME RES, V12, P885, DOI 10.1101/gr.227202
   Wolters JEJ, 2018, TOXICOL LETT, V289, P1, DOI 10.1016/j.toxlet.2018.02.026
   Wolters JEJ, 2017, CHEM RES TOXICOL, V30, P1847, DOI 10.1021/acs.chemrestox.7b00171
   Wong M, 2013, FRONT CELL NEUROSCI, V7, DOI 10.3389/fncel.2013.00279
   Wu XJ, 2017, NAT REV GENET, V18, P517, DOI 10.1038/nrg.2017.33
   Xiao CL, 2018, MOL CELL, V71, P306, DOI 10.1016/j.molcel.2018.06.015
   Xiong J, 2019, NUCLEIC ACIDS RES, V47, P1268, DOI 10.1093/nar/gky1218
   Xu YY, 2017, ENVIRON HEALTH-GLOB, V16, DOI 10.1186/s12940-017-0234-4
   Yang LQ, 2016, TOXICOL LETT, V243, P1, DOI 10.1016/j.toxlet.2015.11.031
   Yasukawa T, 2018, J BIOCHEM, V164, P183, DOI 10.1093/jb/mvy058
   Young MJ, 2016, CURR OPIN GENET DEV, V38, P52, DOI 10.1016/j.gde.2016.03.005
   Zhang QM, 2005, DNA REPAIR, V4, P71, DOI 10.1016/j.dnarep.2004.08.002
   Zhang XR, 2014, CELL, V158, P607, DOI 10.1016/j.cell.2014.05.047
   Zhao XL, 2011, MOL CELL PROTEOMICS, V10, DOI 10.1074/mcp.M110.000299
   Zhao YJ, 2018, CRIT REV ONCOL HEMAT, V131, P76, DOI 10.1016/j.critrevonc.2018.08.005
   Zhou HJ, 2013, J PROTEOME RES, V12, P260, DOI 10.1021/pr300630k
   Zilberman D, 2007, DEVELOPMENT, V134, P3959, DOI 10.1242/dev.001131
NR 174
TC 42
Z9 47
U1 0
U2 38
PU WILEY
PI HOBOKEN
PA 111 RIVER ST, HOBOKEN 07030-5774, NJ USA
SN 0893-6692
EI 1098-2280
J9 ENVIRON MOL MUTAGEN
JI Environ. Mol. Mutagen.
PD OCT
PY 2019
VL 60
IS 8
BP 668
EP 682
DI 10.1002/em.22319
EA AUG 2019
PG 15
WC Environmental Sciences; Genetics & Heredity; Toxicology
WE Science Citation Index Expanded (SCI-EXPANDED)
SC Environmental Sciences & Ecology; Genetics & Heredity; Toxicology
GA JG6ZP
UT WOS:000480062400001
PM 31335990
OA Green Accepted
DA 2022-04-10
ER

PT J
AU Kuang, ES
   Qi, JF
   Ronai, Z
AF Kuang, Ersheng
   Qi, Jianfei
   Ronai, Ze'ev
TI Emerging roles of E3 ubiquitinationligases in autophagy
SO TRENDS IN BIOCHEMICAL SCIENCES
LA English
DT Review
DE ubiquitinationligase; proteasome; autophagy; parkin; RNF5
ID RETICULUM-ASSOCIATED DEGRADATION; TUMOR-SUPPRESSOR; BETA-TRCP; PAXILLIN
   UBIQUITINATION; ATG8-PE DECONJUGATION; NEGATIVE REGULATION; MTOR
   INHIBITOR; CROSS-TALK; PROTEIN; PARKIN
AB Autophagy is an evolutionarily conserved intracellular catabolic process that delivers cytoplasmic components to lysosomes for degradation and recycling. Although originally considered to be a non-selective pathway, it is now recognized that autophagy is involved in selective processes, including the turnover of organelles, removal of protein aggregates, and elimination of intracellular pathogens. This specificity implies that cargo recognition and processing by the autophagy machinery are tightly regulated processes. In support of this, various forms of post-translational modification have been implicated in the regulation of autophagy, one of which is the ubiquitin-proteasome system. Here we review current understanding of the role of ubiquitination in the control of autophagy.
C1 [Kuang, Ersheng; Qi, Jianfei; Ronai, Ze'ev] Sanford Burnham Med Res Inst, Signal Transduct Program, La Jolla, CA 92037 USA.
   [Kuang, Ersheng] Sun Yat Sen Univ, Zhongshan Sch Med, Inst Human Virol, Guangzhou 510080, Guangdong, Peoples R China.
   [Kuang, Ersheng] Minist Educ, Key Lab Trop Dis Control, Guangzhou 510080, Guangdong, Peoples R China.
RP Kuang, ES (corresponding author), Sanford Burnham Med Res Inst, Signal Transduct Program, La Jolla, CA 92037 USA.
EM kuangersh@mail.sysu.edu.cn; ronai@sanfordburnham.org
RI qi, jianfei/O-9847-2014
OI qi, jianfei/0000-0001-7884-7656; RONAI, ZEEV/0000-0002-3859-0400
FU NIHUnited States Department of Health & Human ServicesNational
   Institutes of Health (NIH) - USA [CA097105, CA154888]; Guangdong
   Innovative Research Team Program [2009010058]; Sun Yat-Sen University
   Setup fund; NATIONAL CANCER INSTITUTEUnited States Department of Health
   & Human ServicesNational Institutes of Health (NIH) - USANIH National
   Cancer Institute (NCI) [K99CA154888, R00CA154888, R01CA097105] Funding
   Source: NIH RePORTER
FX This work was supported by NIH grants CA097105 (to Z.R.) and CA154888
   (to J.Q.) and by Guangdong Innovative Research Team Program No.
   2009010058 and the Sun Yat-Sen University Setup fund (to E.K.).
CR Alers S, 2012, MOL CELL BIOL, V32, P2, DOI 10.1128/MCB.06159-11
   Bialik S, 2010, CURR OPIN CELL BIOL, V22, P199, DOI 10.1016/j.ceb.2009.11.004
   Cecconi F, 2012, NAT CELL BIOL, V14, P48, DOI 10.1038/ncb2413
   Chan NC, 2011, HUM MOL GENET, V20, P1726, DOI 10.1093/hmg/ddr048
   Chen D, 2010, J BIOL CHEM, V285, P38214, DOI 10.1074/jbc.M110.101469
   Dai C, 2010, TRENDS MOL MED, V16, P528, DOI 10.1016/j.molmed.2010.09.002
   Das G., 2012, COLD SPRING HARB PER, V4
   Deng L, 2000, CELL, V103, P351, DOI 10.1016/S0092-8674(00)00126-4
   Deretic V, 2010, CURR OPIN CELL BIOL, V22, P252, DOI 10.1016/j.ceb.2009.12.009
   Deretic V, 2009, CELL HOST MICROBE, V5, P527, DOI 10.1016/j.chom.2009.05.016
   Deshaies RJ, 2009, ANNU REV BIOCHEM, V78, P399, DOI 10.1146/annurev.biochem.78.101807.093809
   Didier C, 2003, MOL CELL BIOL, V23, P5331, DOI 10.1128/MCB.23.15.5331-5345.2003
   Frescas D, 2008, NAT REV CANCER, V8, P438, DOI 10.1038/nrc2396
   Galluzzi L, 2010, CELL CYCLE, V9, P250, DOI 10.4161/cc.9.2.10493
   Gao DM, 2011, MOL CELL, V44, P290, DOI 10.1016/j.molcel.2011.08.030
   Gegg ME, 2011, AUTOPHAGY, V7, P243, DOI 10.4161/auto.7.2.14332
   Gegg ME, 2010, HUM MOL GENET, V19, P4861, DOI 10.1093/hmg/ddq419
   Geisler S, 2010, NAT CELL BIOL, V12, P119, DOI 10.1038/ncb2012
   Geng JF, 2008, EMBO REP, V9, P859, DOI 10.1038/embor.2008.163
   Hamai A, 2012, SCI SIGNAL, V5, DOI 10.1126/scisignal.2003187
   Hanada T, 2007, J BIOL CHEM, V282, P37298, DOI 10.1074/jbc.C700195200
   Harris H, 2012, NAT REV NEUROL, V8, P108, DOI 10.1038/nrneurol.2011.200
   He CC, 2009, ANNU REV GENET, V43, P67, DOI 10.1146/annurev-genet-102808-114910
   Heo JY, 2012, PLOS ONE, V7, DOI 10.1371/journal.pone.0032629
   Hershko A, 1998, ANNU REV BIOCHEM, V67, P425, DOI 10.1146/annurev.biochem.67.1.425
   Iioka H, 2007, NAT CELL BIOL, V9, P813, DOI 10.1038/ncb1607
   Janku F, 2011, NAT REV CLIN ONCOL, V8, P528, DOI 10.1038/nrclinonc.2011.71
   Joo HM, 2011, EUR J CELL BIOL, V90, P420, DOI 10.1016/j.ejcb.2010.12.001
   Kamada Y, 2003, CURR TOP MICROBIOL, V279, P73
   Kanki T, 2010, AUTOPHAGY, V6, P433, DOI 10.4161/auto.6.3.11420
   Kim Y, 2008, BIOCHEM BIOPH RES CO, V377, P975, DOI 10.1016/j.bbrc.2008.10.104
   Kimmelman AC, 2011, GENE DEV, V25, P1999, DOI 10.1101/gad.17558811
   Komander D, 2012, ANNU REV BIOCHEM, V81, P203, DOI 10.1146/annurev-biochem-060310-170328
   Korac J, 2013, J CELL SCI, V126, P580, DOI 10.1242/jcs.114926
   Kravtsova-Ivantsiv Y, 2012, J CELL SCI, V125, P539, DOI 10.1242/jcs.093567
   Kroemer G, 2010, MOL CELL, V40, P280, DOI 10.1016/j.molcel.2010.09.023
   Kuang E, 2012, PLOS GENET, V8, DOI 10.1371/journal.pgen.1003007
   Kuballa P, 2012, ANNU REV IMMUNOL, V30, P611, DOI 10.1146/annurev-immunol-020711-074948
   Kundu M, 2008, ANNU REV PATHOL-MECH, V3, P427, DOI 10.1146/annurev.pathmechdis.2.010506.091842
   Lee JY, 2010, J CELL BIOL, V189, P671, DOI 10.1083/jcb.201001039
   Lee JY, 2010, EMBO J, V29, P969, DOI 10.1038/emboj.2009.405
   Lepine S, 2011, J BIOL CHEM, V286, P44380, DOI 10.1074/jbc.M111.257519
   Lerner M, 2007, MOL BIOL CELL, V18, P1670, DOI 10.1091/mbc.E06-03-0248
   Levine B, 2008, CELL, V132, P27, DOI 10.1016/j.cell.2007.12.018
   Levine B, 2011, NATURE, V469, P323, DOI 10.1038/nature09782
   Liang C, 2010, CELL DEATH DIFFER, V17, P1807, DOI 10.1038/cdd.2010.115
   Liu ML, 2010, J BIOL CHEM, V285, P36387, DOI 10.1074/jbc.M110.169284
   Liu W, 2012, AUTOPHAGY, V8, P1407, DOI 10.4161/auto.21152
   Mack HID, 2012, AUTOPHAGY, V8, P1197, DOI 10.4161/auto.20586
   Maiuri MC, 2007, NAT REV MOL CELL BIO, V8, P741, DOI 10.1038/nrm2239
   Maiuri MC, 2010, CURR OPIN CELL BIOL, V22, P181, DOI 10.1016/j.ceb.2009.12.001
   McEwan DG, 2011, TRENDS CELL BIOL, V21, P195, DOI 10.1016/j.tcb.2010.12.006
   Mitra SK, 2006, CURR OPIN CELL BIOL, V18, P516, DOI 10.1016/j.ceb.2006.08.011
   Mizushima N, 2011, CELL, V147, P728, DOI 10.1016/j.cell.2011.10.026
   Mleczak A, 2013, CELL SIGNAL, V25, P1, DOI 10.1016/j.cellsig.2012.09.010
   Morito D, 2008, MOL BIOL CELL, V19, P1328, DOI 10.1091/mbc.E07-06-0601
   Moscat J, 2011, CELL, V147, P724, DOI 10.1016/j.cell.2011.10.021
   Nair U, 2012, AUTOPHAGY, V8, P780, DOI 10.4161/auto.19385
   Nakatogawa H, 2012, AUTOPHAGY, V8, P177, DOI 10.4161/auto.8.2.18373
   Nakatogawa H, 2009, NAT REV MOL CELL BIO, V10, P458, DOI 10.1038/nrm2708
   Narendra D, 2008, J CELL BIOL, V183, P795, DOI 10.1083/jcb.200809125
   Nazio F, 2013, NAT CELL BIOL, V15, P406, DOI 10.1038/ncb2708
   Neufeld TP, 2010, CURR OPIN CELL BIOL, V22, P157, DOI 10.1016/j.ceb.2009.11.005
   Olzmann JA, 2008, AUTOPHAGY, V4, P85, DOI 10.4161/auto.5172
   Orvedahl A, 2011, NATURE, V480, P113, DOI 10.1038/nature10546
   Peterson TR, 2009, CELL, V137, P873, DOI 10.1016/j.cell.2009.03.046
   Pickart CM, 2001, ANNU REV BIOCHEM, V70, P503, DOI 10.1146/annurev.biochem.70.1.503
   Platta HW, 2012, BIOCHEM J, V441, P399, DOI 10.1042/BJ20111424
   Popovic D, 2012, MOL CELL BIOL, V32, P1733, DOI 10.1128/MCB.06717-11
   Rabinowitz JD, 2010, SCIENCE, V330, P1344, DOI 10.1126/science.1193497
   Romanov J, 2012, EMBO J, V31, P4304, DOI 10.1038/emboj.2012.278
   Rotin D, 2009, NAT REV MOL CELL BIO, V10, P398, DOI 10.1038/nrm2690
   Rubinsztein DC, 2007, NAT REV DRUG DISCOV, V6, P304, DOI 10.1038/nrd2272
   Rubinsztein DC, 2012, NAT REV DRUG DISCOV, V11, P709, DOI 10.1038/nrd3802
   Rubinsztein DC, 2011, CELL, V146, P682, DOI 10.1016/j.cell.2011.07.030
   Ryan PE, 2006, TRENDS BIOCHEM SCI, V31, P79, DOI 10.1016/j.tibs.2005.12.004
   Sakaki K, 2008, AUTOPHAGY, V4, P841, DOI 10.4161/auto.6607
   Sandilands E, 2012, NAT CELL BIOL, V14, P51, DOI 10.1038/ncb2386
   Sarraf SA, 2013, NATURE, V496, P372, DOI 10.1038/nature12043
   Shi CS, 2010, AUTOPHAGY, V6, P986, DOI 10.4161/auto.6.7.13288
   Shi CS, 2010, SCI SIGNAL, V3, DOI 10.1126/scisignal.2000751
   Subauste CS, 2007, AUTOPHAGY, V3, P245, DOI 10.4161/auto.3717
   Taillebourg E, 2012, AUTOPHAGY, V8, P767, DOI 10.4161/auto.19381
   Tanaka A, 2010, J CELL BIOL, V191, P1367, DOI 10.1083/jcb.201007013
   Tang FC, 2011, PLOS ONE, V6, DOI 10.1371/journal.pone.0021208
   Tanida I, 2004, J BIOL CHEM, V279, P36268, DOI 10.1074/jbc.M401461200
   Tasaki T, 2013, P NATL ACAD SCI USA, V110, P3800, DOI 10.1073/pnas.1217358110
   Tasdemir E, 2008, AUTOPHAGY, V4, P810, DOI 10.4161/auto.6486
   Tasdemir E, 2008, NAT CELL BIOL, V10, P676, DOI 10.1038/ncb1730
   Tcherpakov M, 2009, J BIOL CHEM, V284, P12099, DOI 10.1074/jbc.M808222200
   Thien CBF, 2001, MOL CELL, V7, P355, DOI 10.1016/S1097-2765(01)00183-6
   Thomas M, 2012, AUTOPHAGY, V8, P1824, DOI 10.4161/auto.21742
   Tomar D, 2012, BBA-MOL CELL RES, V1823, P316, DOI 10.1016/j.bbamcr.2011.11.015
   Van Limbergen J, 2009, MUCOSAL IMMUNOL, V2, P315, DOI 10.1038/mi.2009.20
   Varshavsky A, 2012, ANNU REV BIOCHEM, V81, P167, DOI 10.1146/annurev-biochem-051910-094049
   von Muhlinen N, 2010, AUTOPHAGY, V6, P288, DOI 10.4161/auto.6.2.11118
   Wang YY, 2006, NAT IMMUNOL, V7, P139, DOI 10.1038/ni1294
   Wang ZW, 2012, AM J PHYSIOL-ENDOC M, V303, pE163, DOI 10.1152/ajpendo.00105.2012
   Weidberg H, 2011, ANNU REV BIOCHEM, V80, P125, DOI 10.1146/annurev-biochem-052709-094552
   Wong E, 2010, NAT NEUROSCI, V13, P805, DOI 10.1038/nn.2575
   Xiao N, 2012, BIOCHEM J, V441, P979, DOI 10.1042/BJ20111358
   Xiong H, 2009, J CLIN INVEST, V119, P650, DOI 10.1172/JCI37617
   Xu GQ, 2011, NAT BIOTECHNOL, V29, P1098, DOI 10.1038/nbt.2061
   Xu P, 2009, CELL, V137, P133, DOI 10.1016/j.cell.2009.01.041
   Yoshida H, 2005, J BIOL CHEM, V280, P41111, DOI 10.1074/jbc.M509526200
   Younger JM, 2006, CELL, V126, P571, DOI 10.1016/j.cell.2006.06.041
   Yu ZQ, 2012, AUTOPHAGY, V8, P883, DOI 10.4161/auto.19652
   Zhao YC, 2011, MOL CELL, V44, P304, DOI 10.1016/j.molcel.2011.08.029
   Zhong B, 2010, J IMMUNOL, V184, P6249, DOI 10.4049/jimmunol.0903748
   Zhong B, 2009, IMMUNITY, V30, P397, DOI 10.1016/j.immuni.2009.01.008
   Zhou L, 2011, PLOS ONE, V6, DOI 10.1371/journal.pone.0023936
NR 111
TC 68
Z9 70
U1 1
U2 40
PU ELSEVIER SCIENCE LONDON
PI LONDON
PA 84 THEOBALDS RD, LONDON WC1X 8RR, ENGLAND
SN 0968-0004
EI 1362-4326
J9 TRENDS BIOCHEM SCI
JI Trends Biochem.Sci.
PD SEP
PY 2013
VL 38
IS 9
BP 453
EP 460
DI 10.1016/j.tibs.2013.06.008
PG 8
WC Biochemistry & Molecular Biology
WE Science Citation Index Expanded (SCI-EXPANDED)
SC Biochemistry & Molecular Biology
GA 216LE
UT WOS:000324284100008
PM 23870665
OA Green Accepted
DA 2022-04-10
ER

PT J
AU de Miranda, JX
   Andrade, FD
   de Conti, A
   Dagli, MLZ
   Moreno, FS
   Ong, TP
AF de Miranda, Juliana Xavier
   Andrade, Fabia de Oliveira
   de Conti, Aline
   Zaidan Dagli, Maria Lucia
   Moreno, Fernando Salvador
   Ong, Thomas Prates
TI Effects of selenium compounds on proliferation and epigenetic marks of
   breast cancer cells
SO JOURNAL OF TRACE ELEMENTS IN MEDICINE AND BIOLOGY
LA English
DT Article; Proceedings Paper
CT 10th Meeting of the
   International-Society-for-Trace-Element-Research-in-Humans (ISTERH)
CT 10th International Society for Trace Element Research in Humans (ISTERH)
CY NOV 18-22, 2013
CY NOV 18-22, 2013
CL Tokyo, JAPAN
CL Tokyo, JAPAN
SP Int Soc Trace Element Res Humans
DE MCF-7 breast cancer cells; Epigenetic marks; Apoptosis; Selenium
ID DNA METHYLATION; DIETARY SELENIUM; IN-VITRO; CHEMOPREVENTION;
   COMBINATION; EXPRESSION; HISTONES; RASSF1A; GROWTH; GENES
AB Breast cancer is a global public health problem and the most frequent cause of cancer death among women. Mammary carcinogenesis is driven not only by genetic alterations but also by epigenetic disturbances. Because epigenetic marks are potentially reversible they represent promising molecular target for breast cancer prevention interventions. Selenium is a promising anti-breast cancer trace element that has shown the modulation of DNA methylation and histone post-translational modification in other malignancies. This study aimed to evaluate the effects of selenium compounds [methylseleninic acid (MSA) and selenite] on cell proliferation and death, expression of the tumor suppressor gene RASSF1A and epigenetic marks in MCF-7 human breast adenocarcinoma cells. Treatment with MSA or selenite markedly inhibited (P< 0.05) in a dose-dependent manner the proliferation of MCF-7 cells. MSA induced (P<0.05) G2/M cell arrest while selenite presented the opposite effect. Regarding cell death induction, MSA acted mainly by inducing apoptosis (P<0.05), while selenite only induced necrosis (P<0.05). Furthermore selenite, but not MSA, markedly induced (P<0.05) cytotoxicity and increased (P<0.05) RASSF1A expression. Both selenium compounds inhibited (P<0.05) DNMT1 expression. MSA decreased (P<0.05) H3K9me3 and increased (P<0.05) H41(16ac, while selenite decreased (P<0.05) this latter histone mark. To the best of our knowledge this is the first report showing that selenite and MSA modulate epigenetic marks specifically in breast cancer cells. Our data reinforce the anti-breast cancer potential of selenium that is dependent on its chemical form. Furthermore the data show that epigenetic mechanism represent relevant molecular target involved in selenium inhibitory effects in breast cancer cells. (C) 2014 Elsevier GmbH. All rights reserved.
C1 [de Miranda, Juliana Xavier; Andrade, Fabia de Oliveira; de Conti, Aline; Moreno, Fernando Salvador; Ong, Thomas Prates] Univ Sao Paulo, Fac Pharmaceut Sci, Dept Food & Expt Nutr, Sao Paulo, Brazil.
   [Zaidan Dagli, Maria Lucia] Univ Sao Paulo, Sch Vet Med & Anim Sci, Dept Pathol, Sao Paulo, Brazil.
RP Ong, TP (corresponding author), Univ Sao Paulo, Fac Pharmaceut Sci, Dept Food & Expt Nutr, Sao Paulo, Brazil.
EM tong@usp.br
RI Ong, Thomas/N-1272-2019; Dagli, Maria/C-5809-2012; de Miranda Cerqueira,
   Juliana Xavier/H-4875-2019; Moreno, Fernando/I-1943-2013; Ong, Thomas
   P/C-4494-2012
OI Dagli, Maria/0000-0001-7031-6711; de Miranda Cerqueira, Juliana
   Xavier/0000-0002-5670-9073; Moreno, Fernando/0000-0002-1908-5046; Ong,
   Thomas/0000-0002-7709-1866; Xavier de Miranda Cerqueira,
   Juliana/0000-0001-8220-3503
FU Fundacao de Amparo a Pesquisa do Estado de Sao Paulo (FAPESP,
   Brazil)Fundacao de Amparo a Pesquisa do Estado de Sao Paulo (FAPESP)
   [10/03994-9]
FX The authors are grateful to the financial support grant (10/03994-9)
   byFundacao de Amparo a Pesquisa do Estado de Sao Paulo (FAPESP, Brazil).
CR Andrade FO, 2012, BRAZ J MED BIOL RES, V45, P841, DOI 10.1590/S0100-879X2012007500103
   Chen YC, 2013, INT J CANCER, V133, P2054, DOI 10.1002/ijc.28224
   Dammann R, 2001, CANCER RES, V61, P3105
   Davis CD, 2000, J NUTR, V130, P2903, DOI 10.1093/jn/130.12.2903
   Davis CD, 2002, J NUTR, V132, P292, DOI 10.1093/jn/132.2.292
   Du LP, 2012, NUTR CANCER, V64, P1228, DOI 10.1080/01635581.2012.717682
   Esteller M, 2008, NEW ENGL J MED, V358, P1148, DOI 10.1056/NEJMra072067
   Esteller M, 2007, NAT REV GENET, V8, P286, DOI 10.1038/nrg2005
   Ferlay J, 2013, GLOBOCAN 2012 CANC I
   Goldenberg D, 2004, ARCH OTOLARYNGOL, V130, P39, DOI 10.1001/archotol.130.1.39
   IP C, 1987, CARCINOGENESIS, V8, P1763, DOI 10.1093/carcin/8.12.1763
   Ip C, 2000, CANCER RES, V60, P2882
   Jeong J, 2003, EXP MOL PATHOL, V75, P256, DOI 10.1016/S0014-4800(03)00095-9
   Kassam S, 2011, CANCER CHEMOTH PHARM, V68, P815, DOI 10.1007/s00280-011-1649-1
   Livak KJ, 2001, METHODS, V25, P402, DOI 10.1006/meth.2001.1262
   LU JX, 1995, BIOCHEM PHARMACOL, V50, P213, DOI 10.1016/0006-2952(95)00119-K
   Meplan C, 2014, CANCER TREAT RES, V159, P145, DOI 10.1007/978-3-642-38007-5_9
   Ong TP, 2011, J NUTRIGENET NUTRIGE, V4, P275, DOI 10.1159/000334585
   Ramachandran K, 2007, ANTICANCER RES, V27, P921
   Shah YM, 2005, MOL CANCER THER, V4, P1239, DOI 10.1158/1535-7163.MCT-05-0046
   Suzuki M, 2010, CANCER CHEMOTH PHARM, V66, P475, DOI 10.1007/s00280-009-1183-6
   Verma M, 2014, CANCER EPIDEM BIOMAR, V23, P223, DOI 10.1158/1055-9965.EPI-13-0573
   Xiang N, 2008, CARCINOGENESIS, V29, P2175, DOI 10.1093/carcin/bgn179
NR 23
TC 45
Z9 46
U1 1
U2 25
PU ELSEVIER GMBH, URBAN & FISCHER VERLAG
PI JENA
PA OFFICE JENA, P O BOX 100537, 07705 JENA, GERMANY
SN 0946-672X
J9 J TRACE ELEM MED BIO
JI J. Trace Elem. Med. Biol.
PY 2014
VL 28
IS 4
SI SI
BP 486
EP 491
DI 10.1016/j.jtemb.2014.06.017
PG 6
WC Biochemistry & Molecular Biology; Endocrinology & Metabolism
WE Science Citation Index Expanded (SCI-EXPANDED); Conference Proceedings Citation Index - Science (CPCI-S)
SC Biochemistry & Molecular Biology; Endocrinology & Metabolism
GA AX8AW
UT WOS:000347133800026
PM 25087768
DA 2022-04-10
ER

PT J
AU Patra, S
   Panigrahi, DP
   Praharaj, PP
   Bhol, CS
   Mahapatra, KK
   Mishra, SR
   Behera, BP
   Jena, M
   Bhutia, SK
AF Patra, Srimanta
   Panigrahi, Debasna P.
   Praharaj, Prakash P.
   Bhol, Chandra S.
   Mahapatra, Kewal K.
   Mishra, Soumya R.
   Behera, Bishnu P.
   Jena, Mrutyunjay
   Bhutia, Sujit K.
TI Dysregulation of histone deacetylases in carcinogenesis and tumor
   progression: a possible link to apoptosis and autophagy
SO CELLULAR AND MOLECULAR LIFE SCIENCES
LA English
DT Review
DE Histone deacetylases (HDACs); Cancer; Apoptosis; Autophagy; Mitophagy
ID nf-kappa b; EPITHELIAL-MESENCHYMAL TRANSITION; TRANSCRIPTION FACTOR
   GENES; CELL-DEATH; EPIGENETIC REGULATION; DEPENDENT REGULATION; P53
   ACETYLATION; DOWN-REGULATION; UP-REGULATION; C-TERMINUS
AB Dysregulation of the epigenome and constitutional epimutation lead to aberrant expression of the genes, which regulate cancer initiation and progression. Histone deacetylases (HDACs), which are highly conserved in yeast to humans, are known to regulate numerous proteins involved in the transcriptional regulation of chromatin structures, apoptosis, autophagy, and mitophagy. In addition, a non-permissive chromatin conformation is created by HDACs, preventing the transcription of the genes encoding the proteins associated with tumorigenesis. Recently, an expanding perspective has been reported from the clinical trials with HDACis (HDAC inhibitor), which has emerged as a determining target for the study of the detailed mechanism underlying cancer progression. Therefore, the present review focuses on the comprehensive lucubration of post-translational modification and the molecular mechanism through which HDACs alter the ambiguities associated with epigenome, with particular insights into the initiation, progression, and regulation of cancer.
C1 [Patra, Srimanta; Panigrahi, Debasna P.; Praharaj, Prakash P.; Bhol, Chandra S.; Mahapatra, Kewal K.; Mishra, Soumya R.; Behera, Bishnu P.; Bhutia, Sujit K.] Natl Inst Technol Rourkela, Dept Life Sci, Canc & Cell Death Lab, Rourkela 769008, Odisha, India.
   [Jena, Mrutyunjay] Berhampur Univ, PG Dept Bot, Berhampur 760007, Orissa, India.
RP Bhutia, SK (corresponding author), Natl Inst Technol Rourkela, Dept Life Sci, Canc & Cell Death Lab, Rourkela 769008, Odisha, India.
EM sujitb@nitrkl.ac.in
RI Praharaj, Prakash P./J-5515-2018; Bhol, Chandra Sekhar/W-6462-2019
OI Praharaj, Prakash P./0000-0003-0425-5118; Bhol, Chandra
   Sekhar/0000-0003-3397-6483; Jena, Dr.Mrutyunjay/0000-0003-2157-4292;
   Patra, Srimanta/0000-0002-0166-0903; Behera, Bishnu
   Prasad/0000-0003-0326-6050
FU DST-INSPIRE, Department of Science and Technology, Government of India
   [IF180167]
FX We convey our thanks to the National Institute of Technology, Rourkela.
   SP acknowledges DST-INSPIRE, Award reference number (IF180167),
   Department of Science and Technology, Government of India, for providing
   fellowship.
CR Akiyama Y, 2003, MOL CELL BIOL, V23, P8429, DOI 10.1128/MCB.23.23.8429-8439.2003
   Nieto MA, 2016, CELL, V166, P21, DOI 10.1016/j.cell.2016.06.028
   Annicotte JS, 2006, MOL CELL BIOL, V26, P7561, DOI 10.1128/MCB.00605-06
   Arunachalam G, 2010, BIOCHEM BIOPH RES CO, V393, P66, DOI 10.1016/j.bbrc.2010.01.080
   Augenlicht L, 2003, ONCOGENE, V22, P4983, DOI 10.1038/sj.onc.1206521
   Baxter E, 2014, CELL BIOSCI, V4, DOI 10.1186/2045-3701-4-45
   Bereshchenko OR, 2002, NAT GENET, V32, P606, DOI 10.1038/ng1018
   Boland ML, 2013, FRONT ONCOL, V3, DOI 10.3389/fonc.2013.00292
   Bolden JE, 2006, NAT REV DRUG DISCOV, V5, P769, DOI 10.1038/nrd2133
   Brehm A, 1998, NATURE, V391, P597, DOI 10.1038/35404
   Brunet A, 2004, SCIENCE, V303, P2011, DOI 10.1126/science.1094637
   Byles V, 2012, ONCOGENE, V31, P4619, DOI 10.1038/onc.2011.612
   Caslini C, 2006, ONCOGENE, V25, P5446, DOI 10.1038/sj.onc.1209533
   Cesari R, 2003, P NATL ACAD SCI USA, V100, P5956, DOI 10.1073/pnas.0931262100
   Chalkiadaki A, 2015, NAT REV CANCER, V15, DOI 10.1038/nrc3985
   Chen IC, 2014, MOL CANCER, V13, DOI 10.1186/1476-4598-13-254
   Chen LF, 2001, SCIENCE, V293, P1653, DOI 10.1126/science.1062374
   Chen LF, 2002, EMBO J, V21, P6539, DOI 10.1093/emboj/cdf660
   Chen QW, 2014, ONCOL REP, V31, P523, DOI 10.3892/or.2013.2913
   Chourasia AH, 2015, CANCER METAB, V3, DOI 10.1186/s40170-015-0130-8
   Chu CT, 2013, NAT CELL BIOL, V15, P1197, DOI 10.1038/ncb2837
   Chueh AC, 2015, ANTIOXID REDOX SIGN, V23, P66, DOI 10.1089/ars.2014.5863
   Cohen HY, 2004, MOL CELL, V13, P627, DOI 10.1016/S1097-2765(04)00094-2
   Comb WC, 2011, ONCOGENE, V30, P1727, DOI 10.1038/onc.2010.553
   Crazzolara R, 2002, BRIT J HAEMATOL, V119, P965, DOI 10.1046/j.1365-2141.2002.03955.x
   Criollo A, 2010, AUTOPHAGY, V6, P189, DOI 10.4161/auto.6.1.10818
   Criollo A, 2010, EMBO J, V29, P619, DOI 10.1038/emboj.2009.364
   Dany M, 2015, BBA-MOL CELL RES, V1853, P2834, DOI 10.1016/j.bbamcr.2014.12.039
   Durst KL, 2003, MOL CELL BIOL, V23, P607, DOI 10.1128/MCB.23.2.607-619.2003
   Eckschlager T, 2017, INT J MOL SCI, V18, DOI 10.3390/ijms18071414
   Escaffit F, 2007, MOL CELL BIOL, V27, P554, DOI 10.1128/MCB.00869-06
   Fei PW, 2004, CANCER CELL, V6, P597, DOI 10.1016/j.ccr.2004.10.012
   Feng LJ, 2005, MOL CELL BIOL, V25, P5389, DOI 10.1128/MCB.25.13.5389-5395.2005
   George J, 2016, J INVEST DERMATOL, V136, P809, DOI 10.1016/j.jid.2015.12.026
   Giannakou ME, 2004, TRENDS CELL BIOL, V14, P408, DOI 10.1016/j.tcb.2004.07.006
   Glozak MA, 2007, ONCOGENE, V26, P5420, DOI 10.1038/sj.onc.1210610
   Gong YX, 2014, NAT GENET, V46, P588, DOI 10.1038/ng.2981
   Gregoretti IV, 2004, J MOL BIOL, V338, P17, DOI 10.1016/j.jmb.2004.02.006
   Gu W, 1997, CELL, V90, P595, DOI 10.1016/S0092-8674(00)80521-8
   Guidez F, 2005, MOL CELL BIOL, V25, P5552, DOI 10.1128/MCB.25.13.5552-5566.2005
   Haberland M, 2009, NAT REV GENET, V10, P32, DOI 10.1038/nrg2485
   Hait NC, 2009, SCIENCE, V325, P1254, DOI 10.1126/science.1176709
   Hariharan N, 2010, CIRC RES, V107, P1470, DOI 10.1161/CIRCRESAHA.110.227371
   Hassig CA, 1997, CELL, V89, P341, DOI 10.1016/S0092-8674(00)80214-7
   Head B, 2009, J CELL BIOL, V187, P959, DOI 10.1083/jcb.200906083
   Hellebrekers DMEI, 2006, CANCER RES, V66, P10770, DOI 10.1158/0008-5472.CAN-06-1609
   Herceg Z, 2010, ADV GENET, V70, P1, DOI [10.1016/B978-0-12-380866-0.60001-0, 10.1016/S0065-2660(10)70001-8]
   Huang BH, 2005, CELL DEATH DIFFER, V12, P395, DOI 10.1038/sj.cdd.4401567
   Huang WQ, 2005, J BIOL CHEM, V280, P10047, DOI 10.1074/jbc.M408680200
   Inoue S, 2006, CANCER RES, V66, P6785, DOI 10.1158/0008-5472.CAN-05-4563
   Ito A, 2001, EMBO J, V20, P1331, DOI 10.1093/emboj/20.6.1331
   Jeong H, 2009, CELL, V137, P60, DOI 10.1016/j.cell.2009.03.018
   Ji MY, 2018, AM J CANCER RES, V8, P2402
   Jiang GM, 2013, BBA-MOL CELL RES, V1833, P663, DOI 10.1016/j.bbamcr.2012.12.002
   Kadosh D, 1997, CELL, V89, P365, DOI 10.1016/S0092-8674(00)80217-2
   Kagan VE, 2016, CELL DEATH DIFFER, V23, P1140, DOI 10.1038/cdd.2015.160
   Kim HS, 2010, CANCER CELL, V17, P41, DOI 10.1016/j.ccr.2009.11.023
   Kim MS, 2001, NAT MED, V7, P437, DOI 10.1038/86507
   Kops GJPL, 2002, NATURE, V419, P316, DOI 10.1038/nature01036
   Kovacs JJ, 2005, MOL CELL, V18, P601, DOI 10.1016/j.molcel.2005.04.021
   Landes T, 2010, EMBO REP, V11, P459, DOI 10.1038/embor.2010.50
   Lee IH, 2008, P NATL ACAD SCI USA, V105, P3374, DOI 10.1073/pnas.0712145105
   Lee JY, 2010, J CELL BIOL, V189, P671, DOI 10.1083/jcb.201001039
   Lee JY, 2010, EMBO J, V29, P969, DOI 10.1038/emboj.2009.405
   Lu WD, 2014, TUMOR BIOL, V35, P10699, DOI 10.1007/s13277-014-2372-4
   Ma PP, 2012, P NATL ACAD SCI USA, V109, pE481, DOI 10.1073/pnas.1118403109
   Maceyka M, 2012, TRENDS CELL BIOL, V22, P50, DOI 10.1016/j.tcb.2011.09.003
   Magnaghi-Jaulin L, 1998, NATURE, V391, P601, DOI 10.1038/35410
   Malik S, 2015, SCI REP-UK, V5, DOI 10.1038/srep09841
   Mammucari C, 2007, CELL METAB, V6, P458, DOI 10.1016/j.cmet.2007.11.001
   Matsuda N, 2010, J CELL BIOL, V189, P211, DOI 10.1083/jcb.200910140
   Medina V, 1997, CANCER RES, V57, P3697
   Melnick AM, 2000, MOL CELL BIOL, V20, P2075, DOI 10.1128/MCB.20.6.2075-2086.2000
   Melser S, 2013, CELL METAB, V17, P719, DOI 10.1016/j.cmet.2013.03.014
   Meyers-Needham M, 2012, EMBO MOL MED, V4, P78, DOI 10.1002/emmm.201100189
   Miyo M, 2015, BRIT J CANCER, V113, P492, DOI 10.1038/bjc.2015.226
   Motta MC, 2004, CELL, V116, P551, DOI 10.1016/S0092-8674(04)00126-6
   Nadiminty N, 2006, P NATL ACAD SCI USA, V103, P7264, DOI 10.1073/pnas.0509808103
   Nair SS, 2012, MOL ONCOL, V6, P611, DOI 10.1016/j.molonc.2012.09.005
   Narendra DP, 2010, PLOS BIOL, V8, DOI 10.1371/journal.pbio.1000298
   Nasrin N, 2009, PLOS ONE, V4, DOI 10.1371/journal.pone.0008414
   Nebbioso A, 2018, PLOS GENET, V14, DOI 10.1371/journal.pgen.1007362
   Ng F, 2013, J CELL PHYSIOL, V228, P2262, DOI 10.1002/jcp.24399
   Nganga R, 2018, ADV CANCER RES, V140, P1, DOI 10.1016/bs.acr.2018.04.007
   Oehme I, 2013, P NATL ACAD SCI USA, V110, pE2592, DOI 10.1073/pnas.1300113110
   Ogretmen B, 2018, NAT REV CANCER, V18, P33, DOI 10.1038/nrc.2017.96
   Parbin S, 2014, J HISTOCHEM CYTOCHEM, V62, P11, DOI 10.1369/0022155413506582
   Paroni G, 2004, MOL BIOL CELL, V15, P2804, DOI 10.1091/mbc.E03-08-0624
   Peinado H, 2004, MOL CELL BIOL, V24, P306, DOI 10.1128/MCB.24.1.306-319.2004
   Polletta L, 2015, AUTOPHAGY, V11, P253, DOI 10.1080/15548627.2015.1009778
   Praharaj PP, 2018, CELL MOL LIFE SCI
   Reed SM, 2015, CANCERS, V7, P30, DOI 10.3390/cancers7010030
   Sentelle RD, 2012, NAT CHEM BIOL, V8, P831, DOI 10.1038/NCHEMBIO.1059
   Sharma S, 2010, CARCINOGENESIS, V31, P27, DOI 10.1093/carcin/bgp220
   Shaw J, 2008, P NATL ACAD SCI USA, V105, P20734, DOI 10.1073/pnas.0807735105
   Shin JH, 2011, CELL, V144, P689, DOI 10.1016/j.cell.2011.02.010
   Shogren-Knaak M, 2006, SCIENCE, V311, P844, DOI 10.1126/science.1124000
   Smith BC, 2009, BBA-GENE REGUL MECH, V1789, P45, DOI 10.1016/j.bbagrm.2008.06.005
   Song CL, 2016, ONCOGENE, V35, P631, DOI 10.1038/onc.2015.121
   Song CL, 2013, J BIOL CHEM, V288, P28021, DOI 10.1074/jbc.M113.498758
   Song QH, 2019, SCI REP-UK, V9, DOI 10.1038/s41598-019-39487-6
   Sowter HM, 2001, CANCER RES, V61, P6669
   Subramanian C, 2005, P NATL ACAD SCI USA, V102, P4842, DOI 10.1073/pnas.0408351102
   Tan ZQ, 2016, MOL CANCER THER, V15, P774, DOI 10.1158/1535-7163.MCT-15-0621
   Taunton J, 1996, SCIENCE, V272, P408, DOI 10.1126/science.272.5260.408
   Tolkovsky AM, 2009, BBA-MOL CELL RES, V1793, P1508, DOI 10.1016/j.bbamcr.2009.03.002
   Uo T, 2009, J NEUROSCI, V29, P2824, DOI 10.1523/JNEUROSCI.6186-08.2009
   Velcich A, 2002, SCIENCE, V295, P1726, DOI 10.1126/science.1069094
   Wang D, 2019, CANC RES
   Wang GG, 2007, TRENDS MOL MED, V13, P363, DOI 10.1016/j.molmed.2007.07.003
   Wang L, 2015, INT J CLIN EXP MED, V8, P5263
   Wang XN, 2011, CELL, V147, P893, DOI 10.1016/j.cell.2011.10.018
   Wang ZT, 2016, CELL SIGNAL, V28, P506, DOI 10.1016/j.cellsig.2016.02.006
   West AC, 2014, J CLIN INVEST, V124, P30, DOI 10.1172/JCI69738
   Whetstine JR, 2005, MOL CELL, V18, P483, DOI 10.1016/j.molcel.2005.04.006
   Witt O, 2009, CANCER LETT, V277, P8, DOI 10.1016/j.canlet.2008.08.016
   Wu S, 2016, BIOL CHEM, V397, P75, DOI 10.1515/hsz-2015-0215
   Wu WX, 2014, EMBO REP, V15, P566, DOI 10.1002/embr.201438501
   Xu J, 2013, CURR MOL MED, V13, P387
   Xu W, 2018, CANCER LETT, V420, P1, DOI 10.1016/j.canlet.2018.01.068
   Xu WH, 2015, BIOCHEM BIOPH RES CO, V463, P545, DOI 10.1016/j.bbrc.2015.05.078
   Yamada N, 2006, INT J CANCER, V119, P1850, DOI 10.1002/ijc.22047
   Yamaguchi Y, 2004, J BIOL CHEM, V279, P15630, DOI 10.1074/jbc.M400355200
   Yan W, 2013, ONCOGENE, V32, P599, DOI 10.1038/onc.2012.81
   Yeung F, 2004, EMBO J, V23, P2369, DOI 10.1038/sj.emboj.7600244
   Yu HY, 2014, CLIN CANCER RES, V20, P3434, DOI 10.1158/1078-0432.CCR-13-2952
   Yu W, 2016, J BIOL CHEM, V291, P3268, DOI 10.1074/jbc.M115.702076
   Yuan ZL, 2005, SCIENCE, V307, P269, DOI 10.1126/science.1105166
   Zhang C, 2011, P NATL ACAD SCI USA, V108, P16259, DOI 10.1073/pnas.1113884108
   Zhang J, 2009, CELL DEATH DIFFER, V16, P939, DOI 10.1038/cdd.2009.16
   Zhang YY, 2012, BIOCHEM BIOPH RES CO, V423, P26, DOI 10.1016/j.bbrc.2012.05.053
   Zhao Y, 2006, MOL CELL BIOL, V26, P2782, DOI 10.1128/MCB.26.7.2782-2790.2006
   Zhao Y, 2010, NAT CELL BIOL, V12, P665, DOI 10.1038/ncb2069
   Zhou W, 2009, CURR CANCER DRUG TAR, V9, P91, DOI 10.2174/156800909787314039
   Zhou WH, 2016, CELL REP, V17, P1302, DOI 10.1016/j.celrep.2016.10.006
NR 135
TC 13
Z9 16
U1 3
U2 20
PU SPRINGER BASEL AG
PI BASEL
PA PICASSOPLATZ 4, BASEL, 4052, SWITZERLAND
SN 1420-682X
EI 1420-9071
J9 CELL MOL LIFE SCI
JI Cell. Mol. Life Sci.
PD SEP
PY 2019
VL 76
IS 17
BP 3263
EP 3282
DI 10.1007/s00018-019-03098-1
PG 20
WC Biochemistry & Molecular Biology; Cell Biology
WE Science Citation Index Expanded (SCI-EXPANDED)
SC Biochemistry & Molecular Biology; Cell Biology
GA IR9YR
UT WOS:000481803500001
PM 30982077
DA 2022-04-10
ER

PT J
AU Toshev, N
   Cheshmedzhieva, D
   Dudev, T
AF Toshev, Nikolay
   Cheshmedzhieva, Diana
   Dudev, Todor
TI Factors governing the affinity and selectivity of histone deacetylase
   inhibitor for the HDAC8 enzyme active site: Implications for anticancer
   therapy
SO JOURNAL OF PHYSICAL ORGANIC CHEMISTRY
LA English
DT Article
DE anticancer therapy; DFT; HDAC8; histone deacetylase inhibitor;
   molecular modeling
ID VORINOSTAT
AB Disruptions in post-translational modification of chromatin structure promote uncontrollable cell growth branded as a hallmark of tumor lesions. The overexpression/hyperactivity of histone deacetylases (HDACs) is a common feature for the tumorogenesis and cancer progression. Several inhibitor of histone deacetylases (mainly hydroxamic acid derivatives) have been successfully used as drugs in fighting tumor formations. However, there is no systematic study on the factors controlling the affinity and selectivity of this type of inhibitor to the host enzyme thus hampering successful rational design of more potent and selective anticancer drugs. Herein, in an attempt to unravel the mechanism of the host-guest interactions in these systems at atomic level, we systematically study the effect of various factors in the process and elucidate its key determinants. Density functional theory calculations have been employed. Our findings have the potential to be employed as guidelines in designing new HDAC inhibitor with improved anticancer properties.
C1 [Toshev, Nikolay; Cheshmedzhieva, Diana; Dudev, Todor] Univ Sofia, Fac Chem & Pharm, Sofia 1164, Bulgaria.
   [Toshev, Nikolay] Plekhanov Russian Univ Econ, Fac Trade Econ & Commod Sci, Moscow, Russia.
RP Cheshmedzhieva, D; Dudev, T (corresponding author), Univ Sofia, Fac Chem & Pharm, Sofia 1164, Bulgaria.
EM dvalentinova@chem.uni-sofia.bg; t.dudev@chem.uni-sofia.bg
RI Toshev, Nikolay/AAA-1705-2022
FU Sofia University Science Fund [80-10-21/18.03.2020]
FX Sofia University Science Fund, Grant/Award Number: 80-10-21/18.03.2020
CR Bourguet E, 2018, J MED CHEM, V61, P1745, DOI 10.1021/acs.jmedchem.7b00115
   Bracker TU, 2009, INT J ONCOL, V35, P909, DOI 10.3892/ijo_00000406
   Chandran A, 2015, FRONT CELL INFECT MI, V5, DOI 10.3389/fcimb.2015.00090
   Cheshmedzhieva D, 2018, J MOL MODEL, V24, DOI 10.1007/s00894-018-3651-6
   Choi SE, 2012, BIOORG MED CHEM LETT, V22, P7084, DOI 10.1016/j.bmcl.2012.09.093
   Dennington R., 2009, GAUSSVIEW
   Dokmanovic M, 2005, J CELL BIOCHEM, V96, P293, DOI 10.1002/jcb.20532
   Dudev, 2018, BULG CHEM COMMUN, V50, P228
   Dudev T, 2006, J AM CHEM SOC, V128, P1553, DOI 10.1021/ja055797e
   Dudev T, 2018, INORG CHEM, V57, P14798, DOI 10.1021/acs.inorgchem.8b02548
   Dudev T, 2018, J MOL MODEL, V24, DOI 10.1007/s00894-018-3592-0
   Dudev T, 2014, ACCOUNTS CHEM RES, V47, P3580, DOI 10.1021/ar5002878
   Duvic M, 2007, EXPERT OPIN INV DRUG, V16, P1111, DOI 10.1517/13543784.16.7.1111
   Frisch M.J., 2016, GAUSSIAN 16 REVISION
   Grant PA, 2001, GENOME BIOL, V2
   Haberland M, 2009, NAT REV GENET, V10, P32, DOI 10.1038/nrg2485
   Harding MM, 1999, ACTA CRYSTALLOGR D, V55, P1432, DOI 10.1107/S0907444999007374
   Hsieh CL, 2016, LIFE SCI, V151, P7, DOI 10.1016/j.lfs.2016.02.092
   Kirschbaum MH, 2014, LEUKEMIA LYMPHOMA, V55, P2301, DOI 10.3109/10428194.2013.877134
   Nakagawa M, 2007, ONCOL REP, V18, P769
   Oehme I, 2009, CLIN CANCER RES, V15, P91, DOI 10.1158/1078-0432.CCR-08-0684
   Oki Y, 2013, BRIT J HAEMATOL, V162, P138, DOI 10.1111/bjh.12326
   Przychodzen W, 2008, STRUCT CHEM, V19, P637, DOI 10.1007/s11224-008-9338-3
   Ropero S, 2007, MOL ONCOL, V1, P19, DOI 10.1016/j.molonc.2007.01.001
   SAYLE RA, 1995, TRENDS BIOCHEM SCI, V20, P374, DOI 10.1016/S0968-0004(00)89080-5
   Somoza JR, 2004, STRUCTURE, V12, P1325, DOI 10.1016/j.str.2004.04.012
   Song S, 2015, INT J ONCOL, V47, P1819, DOI 10.3892/ijo.2015.3182
   Struhl K, 1998, GENE DEV, V12, P599, DOI 10.1101/gad.12.5.599
   Tabackman AA, 2016, J STRUCT BIOL, V195, P373, DOI 10.1016/j.jsb.2016.06.023
   Yang J, 2006, LANGMUIR, V22, P10109, DOI 10.1021/la061365l
   YOSHIDA M, 1990, J BIOL CHEM, V265, P17174
NR 31
TC 0
Z9 0
U1 2
U2 3
PU WILEY
PI HOBOKEN
PA 111 RIVER ST, HOBOKEN 07030-5774, NJ USA
SN 0894-3230
EI 1099-1395
J9 J PHYS ORG CHEM
JI J. Phys. Org. Chem.
PD DEC
PY 2021
VL 34
IS 12
AR e4268
DI 10.1002/poc.4268
EA JUL 2021
PG 9
WC Chemistry, Organic; Chemistry, Physical
WE Science Citation Index Expanded (SCI-EXPANDED)
SC Chemistry
GA WW9BX
UT WOS:000674271600001
DA 2022-04-10
ER

PT J
AU Park, S
   Jeon, JH
   Min, BK
   Ha, CM
   Thoudam, T
   Park, BY
   Lee, IK
AF Park, Sungmi
   Jeon, Jae-Han
   Min, Byong-Keol
   Ha, Chae-Myeong
   Thoudam, Themis
   Park, Bo-Yoon
   Lee, In-Kyu
TI Role of the Pyruvate Dehydrogenase Complex in Metabolic Remodeling:
   Differential Pyruvate Dehydrogenase Complex Functions in Metabolism
SO DIABETES & METABOLISM JOURNAL
LA English
DT Review
DE Glycolysis; Metabolism; Mitochondria; Oxidative phosphorylation
ID MUSCLE INSULIN-RESISTANCE; SKELETAL-MUSCLE; HISTONE ACETYLATION; KINASE
   inhibitor; MOUSE MODEL; RAT-HEART; MITOCHONDRIAL; EXPRESSION;
   DICHLOROACETATE; CANCER
AB Mitochondrial dysfunction is a hallmark of metabolic diseases such as obesity, type 2 diabetes mellitus, neurodegenerative diseases, and cancers. Dysfunction occurs in part because of altered regulation of the mitochondrial pyruvate dehydrogenase complex (PDC), which acts as a central metabolic node that mediates pyruvate oxidation after glycolysis and fuels the Krebs cycle to meet energy demands. Fine-tuning of PDC activity has been mainly attributed to post-translational modification of its subunits, including the extensively studied phosphorylation and de-phosphorylation of the E1 alpha subunit of pyruvate dehydrogenase (PDH), modulated by kinases (pyruvate dehydrogenase kinase [PDK] 1-4) and phosphatases (pyruvate dehydrogenase phosphatase [PDP] 1-2), respectively. In addition to phosphorylation, other covalent modifications, including acetylation and succinylation, and changes in metabolite levels via metabolic pathway linked to utilization of glucose, fatty acids, and amino acids, have been identified. In this review, we will summarize the roles of PDC in diverse tissues and how regulation of its activity is affected in various metabolic disorders.
C1 [Park, Sungmi; Lee, In-Kyu] Kyungpook Natl Univ Hosp, Leading Edge Res Ctr Drug Discovery & Dev Diabet, 807 Hoguk Ro, Daegu 41404, South Korea.
   [Jeon, Jae-Han; Lee, In-Kyu] Kyungpook Natl Univ, Sch Med, Dept Internal Med, 130 Dongdeok Ro, Daegu 41944, South Korea.
   [Min, Byong-Keol; Ha, Chae-Myeong; Thoudam, Themis; Park, Bo-Yoon; Lee, In-Kyu] Kyungpook Natl Univ, Dept Biomed Sci, Daegu, South Korea.
   Kyungpook Natl Univ, Plus KNU Biomed Convergence Programs BK21, Daegu, South Korea.
RP Park, S (corresponding author), Kyungpook Natl Univ Hosp, Leading Edge Res Ctr Drug Discovery & Dev Diabet, 807 Hoguk Ro, Daegu 41404, South Korea.; Lee, IK (corresponding author), Kyungpook Natl Univ, Sch Med, Dept Internal Med, 130 Dongdeok Ro, Daegu 41944, South Korea.
EM smpark93@gmail.com; leei@knu.ac.kr
RI Lee, In-Kyu/AAR-6374-2021
OI Park, Sungmi/0000-0002-3074-5914; Min, Byong-Keol/0000-0002-8454-8940
FU Kyungpook National University
FX This research was supported by Kyungpook National University Research
   Fund, 2015. The authors would like to appreciate Prof. Robert A. Harris
   at Department of Biochemistry and Molecular Biology, The University of
   Kansas Medical Center, Kansas City, USA, Dr. Chang Joo Oh and Dr.
   Hyo-Jeong Lee at Research Institute of Aging and Metabolism, School of
   Medicine, Kyungpook National University, Daegu, Republic of Korea for
   the generous review of the manuscript and kind support.
CR Asencio C, 2016, EUR J HUM GENET, V24, P367, DOI 10.1038/ejhg.2015.112
   Battello N, 2016, CANCER METAB, V4, DOI 10.1186/s40170-016-0141-0
   Battiprolu PK, 2014, AM J PHYSIOL-HEART C, V307, pH1401, DOI 10.1152/ajpheart.00755.2013
   Bowker-Kinley MM, 1998, BIOCHEM J, V329, P191, DOI 10.1042/bj3290191
   Caton PW, 2011, BIOCHEM J, V437, P521, DOI 10.1042/BJ20110702
   Cerutti R, 2014, CELL METAB, V19, P1042, DOI 10.1016/j.cmet.2014.04.001
   Cluntun AA, 2015, CANCER METAB, V3, DOI 10.1186/s40170-015-0135-3
   Consitt LA, 2016, AM J PHYSIOL-ENDOC M, V311, pE145, DOI 10.1152/ajpendo.00452.2015
   Constantin-Teodosiu D, 2015, P NATL ACAD SCI USA, V112, pE824, DOI 10.1073/pnas.1422929112
   Cook GA, 2017, BBA-GEN SUBJECTS, V1861, P307, DOI 10.1016/j.bbagen.2016.11.012
   Corbet C, 2016, CELL METAB, V24, P311, DOI 10.1016/j.cmet.2016.07.003
   Cox PJ, 2016, CELL METAB, V24, P256, DOI 10.1016/j.cmet.2016.07.010
   Crewe C, 2017, J BIOL CHEM, V292, P305, DOI 10.1074/jbc.M116.754127
   DeFronzo RA, 2009, DIABETES CARE, V32, pS157, DOI 10.2337/dc09-S302
   Dong KL, 2016, BIOCHEM BIOPH RES CO, V476, P204, DOI 10.1016/j.bbrc.2016.05.087
   Dugan LL, 2013, J CLIN INVEST, V123, P4888, DOI 10.1172/JCI66218
   Fernandez-Sada E, 2014, BRIT J PHARMACOL, V171, P4207, DOI 10.1111/bph.12684
   Fluge O, 2016, JCI INSIGHT, V1, DOI 10.1172/jci.insight.89376
   Foster DW, 2012, J CLIN INVEST, V122, P1958, DOI 10.1172/JCI63967
   Fukushima A, 2016, AM J PHYSIOL-HEART C, V311, pH347, DOI 10.1152/ajpheart.00900.2015
   Geng XK, 2015, STROKE, V46, P492, DOI 10.1161/STROKEAHA.114.006994
   Go Y, 2016, DIABETES, V65, P2876, DOI 10.2337/db16-0223
   Griffin TM, 2016, BIOCHIMIE, V124, P74, DOI 10.1016/j.biochi.2015.10.013
   Guo ZK, 2015, P NATL ACAD SCI USA, V112, pE2854, DOI 10.1073/pnas.1505398112
   Haddy FJ, 2007, NEW ENGL J MED, V356, P2546
   Halim ND, 2010, GLIA, V58, P1168, DOI 10.1002/glia.20996
   Herbst EAF, 2014, AM J PHYSIOL-REG I, V306, pR102, DOI 10.1152/ajpregu.00150.2013
   Huang BL, 2003, DIABETES, V52, P1371, DOI 10.2337/diabetes.52.6.1371
   Jeoung NH, 2014, REV ENDOCR METAB DIS, V15, P99, DOI 10.1007/s11154-013-9284-2
   Jha MK, 2016, NEUROSCI BIOBEHAV R, V68, P1, DOI 10.1016/j.neubiorev.2016.05.006
   Jha MK, 2012, CURR NEUROPHARMACOL, V10, P393, DOI 10.2174/157015912804143586
   Kankotia S, 2014, BBA-REV CANCER, V1846, P617, DOI 10.1016/j.bbcan.2014.08.005
   Le Page LM, 2015, DIABETES, V64, P2735, DOI 10.2337/db14-1560
   Lee H, 2014, KIDNEY INT, V85, P561, DOI 10.1038/ki.2013.397
   Mahmood S, 2016, AM J PHYSIOL-ENDOC M, V311, pE117, DOI 10.1152/ajpendo.00064.2016
   Mathias RA, 2014, CELL, V159, P1615, DOI 10.1016/j.cell.2014.11.046
   McAinch AJ, 2015, EUR J NUTR, V54, P1033, DOI 10.1007/s00394-014-0780-2
   Mori J, 2012, CIRC-HEART FAIL, V5, P493, DOI 10.1161/CIRCHEARTFAILURE.112.966705
[truncated: 4,310,679 more chars]
