# Supplementary material for: The Global research of protein post-translational modifications in the cancer field: A bibliometric and visualized study
Source: Frontiers journal article supplement (doi:10.3389/fonc.2022.978464), 2022-11-03
Supplement: Data_Sheet_1.zip [file Editorial 8.DOC]

FN Clarivate Analytics Web of Science
VR 1.0
PT J
AU Dotz, V
   Haselberg, R
   Shubhakar, A
   Kozak, RP
   Falck, D
   Rombouts, Y
   Reusch, D
   Somsen, GW
   Fernandes, DL
   Wuhrer, M
AF Dotz, Viktoria
   Haselberg, Rob
   Shubhakar, Archana
   Kozak, Radoslaw P.
   Falck, David
   Rombouts, Yoann
   Reusch, Dietmar
   Somsen, Govert W.
   Fernandes, Daryl L.
   Wuhrer, Manfred
TI Mass spectrometry for glycosylation analysis of biopharmaceuticals
SO TRAC-TRENDS IN ANALYTICAL CHEMISTRY
LA English
DT Review
DE Biopharmaceutical; Biosimilar; Capillary electrophoresis coupled to mass
   spectrometry (CE-MS); Glycomics; Glycoproteomics; Glycosylation Critical
   Quality Attributes (GCQA); Liquid chromatography coupled to mass
   spectrometry (LC-MS); Matrix-assisted laser desorption/ionization
   time-of-flight mass spectrometry (MALDITOF-MS); Mass spectrometry;
   Post-translational modification
ID N-LINKED GLYCANS; HUMAN CELL-LINE; CAPILLARY-ELECTROPHORESIS;
   STRUCTURAL-CHARACTERIZATION; LIQUID-CHROMATOGRAPHY; MONOCLONAL-ANTIBODY;
   post-translational modification; THERAPEUTIC ANTIBODIES;
   IMMUNOGLOBULIN-G; ION MOBILITY
AB Biopharmaceuticals are drugs of biotechnological origin used as vaccines or for the treatment of noncommunicable diseases, such as cancer or anemia. Due to their high efficacy and specificity, the market for novel and biosimilar biopharmaceuticals is growing immensely. This growth is accompanied by new challenges in quality control and analytical characterization during drug development and production. Glycosylation is one of the structural modifications that occur during production of many proteinbased drugs and can have significant effects on their pharmacological properties. Mass spectrometry (MS) is a promising technique for high-quality analytical characterization of glycosylation, starting from early drug development through to final lot release. Here, we review the most recent trends in biopharmaceutical glycosylation analysis by MS with and without coupling to liquid chromatography or capillary electrophoresis, and draw comparisons with established, non-MS methods. We discuss future prospects for the emerging MS approaches for the biotech industry and biopharmaceutical research. (C) 2015 Elsevier B.V. All rights reserved.
C1 [Dotz, Viktoria; Haselberg, Rob; Somsen, Govert W.; Wuhrer, Manfred] Vrije Univ Amsterdam, Dept Chem & Pharmaceut Sci, Div BioAnalyt Chem, NL-1081 HV Amsterdam, Netherlands.
   [Shubhakar, Archana; Kozak, Radoslaw P.; Fernandes, Daryl L.] Ludger Ltd, Culham Sci Ctr, Abingdon, Oxon, England.
   [Falck, David; Rombouts, Yoann; Wuhrer, Manfred] Leiden Univ, Med Ctr, Ctr Prote & Metabol, Leiden, Netherlands.
   [Rombouts, Yoann] Leiden Univ, Med Ctr, Dept Rheumatol, Leiden, Netherlands.
   [Rombouts, Yoann] CNRS, UMR 8576, Villeneuve Dascq, France.
   [Reusch, Dietmar] Roche Diagnost GmbH, Pharma Biotech Dev Penzberg, Penzberg, Germany.
RP Wuhrer, M (corresponding author), Vrije Univ Amsterdam, Dept Chem & Pharmaceut Sci, Div BioAnalyt Chem, De Boelelaan 1083, NL-1081 HV Amsterdam, Netherlands.
EM m.wuhrer@vu.nl
RI Falck, David/J-6437-2019; Haselberg, Rob/F-6215-2013; Wuhrer,
   Manfred/ABE-9168-2020
OI Falck, David/0000-0003-3908-2376; Haselberg, Rob/0000-0003-1892-1724;
   Wuhrer, Manfred/0000-0002-0814-4995; Rombouts, Yoann/0000-0003-4482-2199
FU European UnionEuropean Commission [278535]; Hoffmann-La RocheHoffmann-La
   Roche
FX This work was supported by the European Union Seventh Framework
   Programme (FP7-Health-F5-2011) under Grant Agreement No 278535
   (HighGlycan). David Falck acknowledges financial support by Hoffmann-La
   Roche.
CR Alley WR, 2013, CHEM REV, V113, P2668, DOI 10.1021/cr3003714
   An YM, 2013, J PROTEOME RES, V12, P3707, DOI 10.1021/pr400329k
   [Anonymous], 2013, M2PRESSWIRE
   Arnold JN, 2007, ANNU REV IMMUNOL, V25, P21, DOI 10.1146/annurev.immunol.25.022106.141702
   Ayoub D, 2013, MABS-AUSTIN, V5, P699, DOI 10.4161/mabs.25423
   Beck A, 2013, ANAL CHEM, V85, P715, DOI 10.1021/ac3032355
   Blanchard V, 2011, J CARBOHYD CHEM, V30, P320, DOI 10.1080/07328303.2011.605194
   Bongers J, 2011, J CHROMATOGR A, V1218, P8140, DOI 10.1016/j.chroma.2011.08.089
   Bunz SC, 2013, ANAL CHEM, V85, P10218, DOI 10.1021/ac401930j
   Chevreux G, 2013, GLYCOBIOLOGY, V23, P1531, DOI 10.1093/glycob/cwt085
   Costa AR, 2014, CRIT REV BIOTECHNOL, V34, P281, DOI 10.3109/07388551.2013.793649
   Dallas DC, 2013, BRIEF BIOINFORM, V14, P361, DOI 10.1093/bib/bbs045
   Damen CWN, 2009, J AM SOC MASS SPECTR, V20, P2021, DOI 10.1016/j.jasms.2009.07.017
   del Val IJ, 2010, BIOTECHNOL PROGR, V26, P1505, DOI 10.1002/btpr.470
   Delobel Arnaud, 2013, Methods Mol Biol, V988, P115, DOI 10.1007/978-1-62703-327-5_8
   Du Y, 2012, J CHROMATOGR B, V907, P87, DOI 10.1016/j.jchromb.2012.09.004
   Furukawa J, 2011, ANAL CHEM, V83, P9060, DOI 10.1021/ac2019848
   Gahoual R, 2013, MABS-AUSTIN, V5, P479, DOI 10.4161/mabs.23995
   Gennaro LA, 2008, ANAL CHEM, V80, P3838, DOI 10.1021/ac800152h
   Gimenez E, 2012, ANAL CHIM ACTA, V709, P81, DOI 10.1016/j.aca.2011.10.028
   Guttman A, 2013, TRAC-TREND ANAL CHEM, V48, P132, DOI 10.1016/j.trac.2013.04.006
   Halim A, 2014, J PROTEOME RES, V13, P6024, DOI 10.1021/pr500898r
   Harazono A, 2013, J PHARMACEUT BIOMED, V83, P65, DOI 10.1016/j.jpba.2013.04.031
   Harrison R, 2012, GLYCOBIOLOGY, V22, P662, DOI 10.1093/glycob/cws002
   Harvey DJ, 2013, ELECTROPHORESIS, V34, P2368, DOI 10.1002/elps.201200669
   Harvey DJ, 2011, J AM SOC MASS SPECTR, V22, P568, DOI 10.1007/s13361-010-0053-0
   Harvey DJ, 2011, J CHROMATOGR B, V879, P1196, DOI 10.1016/j.jchromb.2010.11.010
   Haselberg R, 2013, ANAL CHEM, V85, P2289, DOI 10.1021/ac303158f
   Haselberg R, 2013, ELECTROPHORESIS, V34, P99, DOI 10.1002/elps.201200439
   He L, 2014, J PROTEOME RES, V13, P3881, DOI 10.1021/pr401115y
   Heemskerk AAM, 2013, ELECTROPHORESIS, V34, P383, DOI 10.1002/elps.201200357
   Higgins E, 2010, GLYCOCONJUGATE J, V27, P211, DOI 10.1007/s10719-009-9261-x
   Hossler P, 2009, GLYCOBIOLOGY, V19, P936, DOI 10.1093/glycob/cwp079
   Houel S, 2014, ANAL CHEM, V86, P576, DOI 10.1021/ac402726h
   Hu YL, 2012, ELECTROPHORESIS, V33, P1768, DOI 10.1002/elps.201100703
   Huang RYC, 2013, BIOCHEMISTRY-US, V52, P7127, DOI 10.1021/bi4011094
   Huffman JE, 2014, MOL CELL PROTEOMICS, V13, P1598, DOI 10.1074/mcp.M113.037465
   Janin-Bussat Marie-Claire, 2013, Methods Mol Biol, V988, P93, DOI 10.1007/978-1-62703-327-5_7
   Jayo RG, 2014, ANAL CHEM, V86, P6479, DOI 10.1021/ac5010212
   Jensen PH, 2012, NAT PROTOC, V7, P1299, DOI 10.1038/nprot.2012.063
   Kannicht C, 2013, THROMB RES, V131, P78, DOI 10.1016/j.thromres.2012.09.011
   Khatri K, 2014, J PROTEOME RES, V13, P4347, DOI 10.1021/pr500506z
   Kolarich D, 2012, NAT PROTOC, V7, P1285, DOI 10.1038/nprot.2012.062
   Kozak RP, 2012, ANAL BIOCHEM, V423, P119, DOI 10.1016/j.ab.2012.01.002
   Lee KJ, 2013, GLYCOCONJUGATE J, V30, P537, DOI 10.1007/s10719-012-9453-7
   Leymarie N, 2013, MOL CELL PROTEOMICS, V12, P2935, DOI 10.1074/mcp.M113.030643
   Li HL, 2013, ANAL CHEM, V85, P2760, DOI 10.1021/ac303273z
   Little MJ, 2006, ELECTROPHORESIS, V27, P2477, DOI 10.1002/elps.200500951
   Lusch A, 2013, MOL PHARMACEUT, V10, P2616, DOI 10.1021/mp400043r
   Mayampurath A, 2014, ANAL CHEM, V86, P453, DOI 10.1021/ac402338u
   Mechref Y, 2003, ANAL CHEM, V75, P4895, DOI 10.1021/ac0341968
   Oh MJ, 2013, BIOANALYSIS, V5, P545, DOI [10.4155/BIO.12.327, 10.4155/bio.12.327]
   Prien JM, 2010, ANAL CHEM, V82, P1498, DOI 10.1021/ac902617t
   Reiding KR, 2014, ANAL CHEM, V86, P5784, DOI 10.1021/ac500335t
   Reusch D, 2014, MABS-AUSTIN, V6, P185, DOI 10.4161/mabs.26712
   Reusch D, 2013, ANAL BIOCHEM, V432, P82, DOI 10.1016/j.ab.2012.09.032
   Rosati S, 2014, NAT PROTOC, V9, P967, DOI 10.1038/nprot.2014.057
   Ruhaak LR, 2010, ANAL BIOANAL CHEM, V397, P3457, DOI 10.1007/s00216-010-3532-z
   Sandra K, 2014, J CHROMATOGR A, V1335, P81, DOI 10.1016/j.chroma.2013.11.057
   Selman MHJ, 2010, ANAL CHEM, V82, P1073, DOI 10.1021/ac9024413
   Shah B, 2014, J AM SOC MASS SPECTR, V25, P999, DOI 10.1007/s13361-014-0858-3
   Song T, 2014, ANAL CHEM, V86, P5661, DOI 10.1021/ac501102t
   Staub A, 2011, J PHARMACEUT BIOMED, V55, P810, DOI 10.1016/j.jpba.2011.01.031
   Tanaka M, 2013, EUR J PHARM BIOPHARM, V83, P123, DOI 10.1016/j.ejpb.2012.11.001
   Thompson NJ, 2013, CHEM COMMUN, V49, P538, DOI 10.1039/c2cc36755f
   Wada Y, 2007, GLYCOBIOLOGY, V17, P411, DOI 10.1093/glycob/cwl086
   Wada Y, 2010, MOL CELL PROTEOMICS, V9, P719, DOI 10.1074/mcp.M900450-MCP200
   Wagner-Rousset E, 2008, J CHROMATOGR B, V872, P23, DOI 10.1016/j.jchromb.2008.03.032
   Wang CJ, 2011, PROTEOMICS, V11, P4229, DOI 10.1002/pmic.201000677
   Wang ZH, 2013, ANAL BIOCHEM, V437, P20, DOI 10.1016/j.ab.2013.02.006
   Wuhrer M, 2009, MASS SPECTROM REV, V28, P192, DOI 10.1002/mas.20195
   Xie HW, 2010, MABS-AUSTIN, V2, P379, DOI 10.4161/mabs.11986
   Yamaguchi Y, 2012, RAPID COMMUN MASS SP, V26, P2877, DOI 10.1002/rcm.6412
   Yang WM, 2014, ANAL CHEM, V86, P6959, DOI 10.1021/ac500876p
   Yuen CT, 2011, BIOLOGICALS, V39, P396, DOI 10.1016/j.biologicals.2011.08.012
   Zauner G., 1820, BIOCHIM BIOPHYS ACTA, V2012, P1420
   Zauner G, 2012, BIOL CHEM, V393, P687, DOI 10.1515/hsz-2012-0144
   Zhang PQ, 2013, PHARM BIOPROCESS, V1, P89, DOI 10.4155/PBP.13.7
   Zhang ZQ, 2009, MASS SPECTROM REV, V28, P147, DOI 10.1002/mas.20190
NR 79
TC 51
Z9 53
U1 2
U2 85
PU ELSEVIER SCI LTD
PI OXFORD
PA THE BOULEVARD, LANGFORD LANE, KIDLINGTON, OXFORD OX5 1GB, OXON, ENGLAND
SN 0165-9936
EI 1879-3142
J9 TRAC-TREND ANAL CHEM
JI Trac-Trends Anal. Chem.
PD NOV
PY 2015
VL 73
BP 1
EP 9
DI 10.1016/j.trac.2015.04.024
PG 9
WC Chemistry, Analytical
WE Science Citation Index Expanded (SCI-EXPANDED)
SC Chemistry
GA CW3NF
UT WOS:000364898300009
DA 2022-04-10
ER

PT J
AU Wang, T
   Holt, MV
   Young, NL
AF Wang, Tao
   Holt, Matthew V.
   Young, Nicolas L.
TI Early butyrate induced acetylation of histone H4 is proteoform specific
   and linked to methylation state
SO epigenetic
LA English
DT Article
DE Histone post-translational modification; histone proteoforms; dynamics
   of histone proteoforms; epigenetic inhibitor; top down proteomics
ID mass spectrometry; STRUCTURAL BASIS; CHROMATIN; ACETYLTRANSFERASE;
   BROMODOMAIN; HETEROCHROMATIN; DISEASE; CANCER; CELLS; H3
AB Histone post-translational modification (PTMs) help regulate DNA templated processes; however, relatively little work has unbiasedly explored the single-molecule combinations of histone PTMs, their dynamics on short timescales, or how these preexisting histone PTMs modulate further histone modifying enzyme activity. We use quantitative top down proteomics to unbiasedly measure histone H4 proteoforms (single-molecule combinations of PTMs) upon butyrate treatment. Our results show that histone proteoforms change in cells within 10minutes of application of sodium butyrate. Cells recover from treatment within 30minutes after removal of butyrate. Surprisingly, K20me2 containing proteoforms are the near-exclusive substrate of histone acetyltransferases upon butyrate treatment. Single-molecule hierarchies of progressive PTMs mostly dictate the addition and removal of histone PTMs (K16ac > K12ac >= K8ac > K5ac, and the reverse on recovery). This reveals the underlying single-molecule mechanism that explains the previously reported but indistinct and unexplained patterns of H4 acetylation. Thus, preexisting histone PTMs strongly modulate histone modifying enzyme activity and this suggests that proteoform constrained reaction pathway are crucial mechanism that enable the long-term stability of the cellular epigenetic state.
C1 [Wang, Tao; Holt, Matthew V.; Young, Nicolas L.] Baylor Coll Med, Verna & Marrs Mclean Dept Biochem & Mol Biol, Houston, TX 77030 USA.
   [Young, Nicolas L.] Baylor Coll Med, Dept Mol & Cellular Biol, Houston, TX 77030 USA.
RP Young, NL (corresponding author), Baylor Coll Med, Verna & Marrs Mclean Dept Biochem & Mol Biol, Houston, TX 77030 USA.; Young, NL (corresponding author), Baylor Coll Med, Dept Mol & Cellular Biol, Houston, TX 77030 USA.
EM nlyoung@bcm.edu
OI Wang, Tao/0000-0002-9641-6558; Young, Nicolas/0000-0002-3323-2815; Holt,
   Matthew/0000-0002-1418-6139
CR Abdelfatah E, 2016, THER ADV GASTROENTER, V9, P560, DOI 10.1177/1756283X16644247
   Allfrey VG, P NATL ACAD SCI, V51, P786
   Andrews AJ, 2010, MOL CELL, V37, P834, DOI 10.1016/j.molcel.2010.01.037
   Bannister AJ, 2011, CELL RES, V21, P381, DOI 10.1038/cr.2011.22
   Brownell JE, 1996, CELL, V84, P843, DOI 10.1016/S0092-8674(00)81063-6
   Campos EI, 2009, ANNU REV GENET, V43, P559, DOI 10.1146/annurev.genet.032608.103928
   Cosgrove MS, 2004, NAT STRUCT MOL BIOL, V11, P1037, DOI 10.1038/nsmb851
   COUPPEZ M, 1987, J BIOL CHEM, V262, P2854
   Daujat S, 2002, CURR BIOL, V12, P2090, DOI 10.1016/S0960-9822(02)01387-8
   Davie JR, 2003, J NUTR, V133, p2485S, DOI 10.1093/jn/133.7.2485S
   Davie JR, 1998, CURR OPIN GENET DEV, V8, P173, DOI 10.1016/S0959-437X(98)80138-X
   Dhalluin C, 1999, NATURE, V399, P491, DOI 10.1038/20974
   DiMaggio PA, 2009, MOL CELL PROTEOMICS, V8, P2527, DOI 10.1074/mcp.M900144-MCP200
   Ekwall K, 2005, TRENDS GENET, V21, P608, DOI 10.1016/j.tig.2005.08.009
   Fang J, 2002, CURR BIOL, V12, P1086, DOI 10.1016/S0960-9822(02)00924-7
   Fischle W, 2005, NATURE, V438, P1116, DOI 10.1038/nature04219
   Fraga MF, 2005, NAT GENET, V37, P391, DOI 10.1038/ng1531
   Gajan A, 2016, EPIGENET CHROMATIN, V9, DOI 10.1186/s13072-016-0053-9
   Garcia BA, 2007, NAT PROTOC, V2, P933, DOI 10.1038/nprot.2007.106
   GERSHEY EL, 1968, J BIOL CHEM, V243, P5018
   Halsall JA, 2015, EPIGENET CHROMATIN, V8, DOI 10.1186/s13072-015-0021-9
   Heerboth S, 2014, GENET epigenetic, V6, P9, DOI 10.4137/GEG.S12270
   Hudson BP, 2000, J MOL BIOL, V304, P355, DOI 10.1006/jmbi.2000.4207
   Jacobson RH, 2000, SCIENCE, V288, P1422, DOI 10.1126/science.288.5470.1422
   Jeanmougin F, 1997, TRENDS BIOCHEM SCI, V22, P151, DOI 10.1016/S0968-0004(97)01042-6
   Katan-Khaykovich Y, 2002, GENE DEV, V16, P743, DOI 10.1101/gad.967302
   Kimura A, 2005, J BIOCHEM, V138, P647, DOI 10.1093/jb/mvi184
   KLEFF S, 1995, J BIOL CHEM, V270, P24674, DOI 10.1074/jbc.270.42.24674
   Lee MG, 2006, MOL CELL BIOL, V26, P6395, DOI 10.1128/MCB.00723-06
   Luger K, 1997, NATURE, V389, P251, DOI 10.1038/38444
   Owen DJ, 2000, EMBO J, V19, P6141, DOI 10.1093/emboj/19.22.6141
   Peters AHFM, 2003, MOL CELL, V12, P1577, DOI 10.1016/S1097-2765(03)00477-5
   Plazas-Mayorca MD, 2009, J PROTEOME RES, V8, P5367, DOI 10.1021/pr900777e
   Portela A, 2010, NAT BIOTECHNOL, V28, P1057, DOI 10.1038/nbt.1685
   Raha P, 2015, BREAST CANCER RES, V17, DOI 10.1186/s13058-015-0533-z
   ROEDIGER WEW, 1982, GASTROENTEROLOGY, V83, P424
   Sadri-Vakili G, 2006, NAT CLIN PRACT NEURO, V2, P330, DOI 10.1038/ncpneuro0199
   Schiltz RL, 1999, J BIOL CHEM, V274, P1189, DOI 10.1074/jbc.274.3.1189
   Schmidt T, 2018, NUCLEIC ACIDS RES, V46, pD1271, DOI 10.1093/nar/gkx1029
   Schotta G, 2004, GENE DEV, V18, P1251, DOI 10.1101/gad.300704
   Seto E, 2014, CSH PERSPECT BIOL, V6, DOI 10.1101/cshperspect.a018713
   Shechter D, 2007, NAT PROTOC, V2, P1445, DOI 10.1038/nprot.2007.202
   Sidoli S, 2016, JOVE-J VIS EXP, DOI 10.3791/54112
   SOBEL RE, 1994, J BIOL CHEM, V269, P18576
   Stewart MD, 2005, MOL CELL BIOL, V25, P2525, DOI 10.1128/MCB.25.7.2525-2538.2005
   Sweet SMM, 2010, J BIOL CHEM, V285, P32778, DOI 10.1074/jbc.M110.145094
   Thiru A, 2004, EMBO J, V23, P489, DOI 10.1038/sj.emboj.7600088
   THORNE AW, 1990, EUR J BIOCHEM, V193, P701, DOI 10.1111/j.1432-1033.1990.tb19390.x
   Vaquero Alejandro, 2003, Sci Aging Knowledge Environ, V2003, pRE4, DOI 10.1126/sageke.2003.14.re4
   Zhang LW, 2007, J PROTEOME RES, V6, P81, DOI 10.1021/pr060139u
NR 50
TC 13
Z9 14
U1 2
U2 8
PU TAYLOR & FRANCIS INC
PI PHILADELPHIA
PA 530 WALNUT STREET, STE 850, PHILADELPHIA, PA 19106 USA
SN 1559-2294
EI 1559-2308
J9 epigenetic-US
JI epigenetic
PY 2018
VL 13
IS 5
BP 519
EP 535
DI 10.1080/15592294.2018.1475979
PG 17
WC Biochemistry & Molecular Biology; Genetics & Heredity
WE Science Citation Index Expanded (SCI-EXPANDED)
SC Biochemistry & Molecular Biology; Genetics & Heredity
GA GS7GF
UT WOS:000443868300005
PM 29940793
OA Green Published, Bronze
DA 2022-04-10
ER

PT J
AU Jeronimo, C
   Robert, F
AF Jeronimo, Celia
   Robert, Francois
TI Histone chaperones FACT and Spt6 prevent histone variants from turning
   into histone deviants
SO BIOESSAYS
LA English
DT Article
DE CenH3; CENP-A; Cse4; FACT; H2A; Z; histone chaperone; histone variant;
   Psh1; Spt6; Spt16; SWR-C; ubiquitin
ID E3 ubiquitinationLIGASE; CENP-A; CENTROMERIC CHROMATIN; CRYSTAL-STRUCTURE;
   BUDDING YEAST; SACCHAROMYCES-CEREVISIAE; ECTOPIC LOCALIZATION;
   NUCLEOSOME STRUCTURE; colorectal cancer; DNA-REPLICATION
AB Histone variants are specialized histones which replace their canonical counterparts in specific nucleosomes. Together with histone post-translational modification and DNA methylation, they contribute to the epigenome. Histone variants are incorporated at specific locations by the concerted action of histone chaperones and ATP-dependent chromatin remodelers. Recent studies have shown that the histone chaperone FACT plays key roles in preventing pervasive incorporation of two histone variants: H2A.Z and CenH3/CENP-A. In addition, Spt6, another histone chaperone, was also shown to be important for appropriate H2A.Z localization. FACT and Spt6 are both associated with elongating RNA polymerase II. Based on these two examples, we propose that the establishment and maintenance of histone variant genomic distributions depend on a transcription-coupled epigenome editing (or surveillance) function of histone chaperones.
C1 [Jeronimo, Celia; Robert, Francois] Inst Rech Clin Montreal, Montreal, PQ H2W 1R7, Canada.
   [Robert, Francois] Univ Montreal, Fac Med, Dept Med, Montreal, PQ H3C 3J7, Canada.
RP Robert, F (corresponding author), Inst Rech Clin Montreal, Montreal, PQ H2W 1R7, Canada.; Robert, F (corresponding author), Univ Montreal, Fac Med, Dept Med, Montreal, PQ H3C 3J7, Canada.
EM francois.robert@ircm.qc.ca
RI Robert, Francois/D-2316-2012
FU Canadian Institutes for Health ResearchCanadian Institutes of Health
   Research (CIHR) [MOP-133648]
FX We thank Nicole Francis for her critical reading of this article. This
   work was funded by a grant from the Canadian Institutes for Health
   Research (MOP-133648) to FR.
CR Alatwi HE, 2015, EMBO REP, V16, P986, DOI 10.15252/embr.201540330
   Amato A, 2009, MOL CANCER, V8, DOI 10.1186/1476-4598-8-119
   Arimura Y, 2014, SCI REP-UK, V4, DOI 10.1038/srep07115
   Au WC, 2008, GENETICS, V179, P263, DOI 10.1534/genetics.108.088518
   Avvakumov N, 2011, MOL CELL, V41, P502, DOI 10.1016/j.molcel.2011.02.013
   Belotserkovskaya R, 2003, SCIENCE, V301, P1090, DOI 10.1126/science.1085703
   Billon P, 2012, BBA-GENE REGUL MECH, V1819, P290, DOI 10.1016/j.bbagrm.2011.10.004
   Burgess RJ, 2013, NAT STRUCT MOL BIOL, V20, P14, DOI 10.1038/nsmb.2461
   Camahort R, 2009, MOL CELL, V35, P794, DOI 10.1016/j.molcel.2009.07.022
   Chen CC, 2015, DEV CELL, V34, P73, DOI 10.1016/j.devcel.2015.05.012
   Choi ES, 2012, PLOS GENET, V8, DOI 10.1371/journal.pgen.1002985
   Clarkson MJ, 1999, NATURE, V399, P694, DOI 10.1038/21436
   Codomo CA, 2014, NAT STRUCT MOL BIOL, V21, P4, DOI 10.1038/nsmb.2743
   Conerly ML, 2010, GENOME RES, V20, P1383, DOI 10.1101/gr.106542.110
   da Rosa JL, 2011, GENETICS, V187, P9, DOI 10.1534/genetics.110.123117
   Dalal Y, 2007, PLOS BIOL, V5, P1798, DOI 10.1371/journal.pbio.0050218
   De Rop V, 2012, CHROMOSOMA, V121, P527, DOI 10.1007/s00412-012-0386-5
   Deyter GMR, 2014, GENE DEV, V28, P1815, DOI 10.1101/gad.243113.114
   Dunican DS, 2002, ONCOGENE, V21, P3253, DOI 10.1038/sj.onc.1205431
   Dunleavy EM, 2013, NAT STRUCT MOL BIOL, V20, P648, DOI 10.1038/nsmb.2602
   Furuyama T, 2013, NUCLEIC ACIDS RES, V41, P5769, DOI 10.1093/nar/gkt314
   Fussner E, 2011, TRENDS BIOCHEM SCI, V36, P1, DOI 10.1016/j.tibs.2010.09.002
   Garcia H, 2013, CELL REP, V4, P159, DOI 10.1016/j.celrep.2013.06.013
   Gurard-Levin ZA, 2014, ANNU REV BIOCHEM, V83, P487, DOI 10.1146/annurev-biochem-060713-035536
   Gursoy-Yuzugullu O, 2015, P NATL ACAD SCI USA, V112, P7507, DOI 10.1073/pnas.1504868112
   Hasson D, 2013, NAT STRUCT MOL BIOL, V20, P687, DOI 10.1038/nsmb.2562
   Henikoff S, 2005, ANNU REV CELL DEV BI, V21, P133, DOI 10.1146/annurev.cellbio.21.012704.133518
   Henikoff S, 2014, ELIFE, V3, DOI 10.7554/eLife.01861
   Heo K, 2008, MOL CELL, V30, P86, DOI 10.1016/j.molcel.2008.02.029
   Hewawasam G, 2010, MOL CELL, V40, P444, DOI 10.1016/j.molcel.2010.10.014
   Hondele M, 2013, NUCLEUS-AUSTIN, V4, P443, DOI 10.4161/nucl.27235
   Hondele M, 2013, NATURE, V499, P111, DOI 10.1038/nature12242
   Hsieh FK, 2013, P NATL ACAD SCI USA, V110, P7654, DOI 10.1073/pnas.1222198110
   Hua S, 2008, MOL SYST BIOL, V4, DOI 10.1038/msb.2008.25
   Jamai A, 2009, MOL CELL, V35, P377, DOI 10.1016/j.molcel.2009.07.001
   Jensen K, 2011, MOL GENET GENOMICS, V285, P287, DOI 10.1007/s00438-011-0604-5
   Jeronimo C, 2015, MOL CELL, V58, P1113, DOI 10.1016/j.molcel.2015.03.030
   Kaplan CD, 2003, SCIENCE, V301, P1096, DOI 10.1126/science.1087374
   Kapoor A, 2010, NATURE, V468, P1105, DOI 10.1038/nature09590
   Kemble DJ, 2015, MOL CELL, V60, P294, DOI 10.1016/j.molcel.2015.09.008
   KORNBERG RD, 1974, SCIENCE, V184, P868, DOI 10.1126/science.184.4139.868
   Krassovsky K, 2012, P NATL ACAD SCI USA, V109, P243, DOI 10.1073/pnas.1118898109
   Luger K, 1997, NATURE, V389, P251, DOI 10.1038/38444
   Maeshima K, 2014, CHROMOSOMA, V123, P225, DOI 10.1007/s00412-014-0460-2
   Mao Z, 2014, CELL RES, V24, P389, DOI 10.1038/cr.2014.30
   Marques M, 2010, epigenetic-US, V5, P267, DOI 10.4161/epi.5.4.11520
   Miell MDD, 2014, NAT STRUCT MOL BIOL, V21, P5, DOI 10.1038/nsmb.2744
   Miell MDD, 2013, NAT STRUCT MOL BIOL, V20, P763, DOI 10.1038/nsmb.2574
   Mizuguchi G, 2007, CELL, V129, P1153, DOI 10.1016/j.cell.2007.04.026
   Moreno-Moreno O, 2011, CURR BIOL, V21, P1488, DOI 10.1016/j.cub.2011.07.041
   Morillo-Huesca M, 2010, PLOS GENET, V6, DOI 10.1371/journal.pgen.1000964
   Narlikar GJ, 2013, CELL, V154, P490, DOI 10.1016/j.cell.2013.07.011
   Obri A, 2014, NATURE, V505, P648, DOI 10.1038/nature12922
   Okada M, 2009, MOL BIOL CELL, V20, P3986, DOI 10.1091/mbc.E09-01-0065
   Orphanides G, 1998, CELL, V92, P105, DOI 10.1016/S0092-8674(00)80903-4
   OUDET P, 1975, CELL, V4, P281, DOI 10.1016/0092-8674(75)90149-X
   Ranjan A, 2013, CELL, V154, P1232, DOI 10.1016/j.cell.2013.08.005
   Ranjitkar P, 2010, MOL CELL, V40, P455, DOI 10.1016/j.molcel.2010.09.025
   Ransom M, 2010, CELL, V140, P183, DOI 10.1016/j.cell.2010.01.004
   Rhodes DR, 2004, P NATL ACAD SCI USA, V101, P9309, DOI 10.1073/pnas.0401994101
   Ridgway P, 2004, J BIOL CHEM, V279, P43815, DOI 10.1074/jbc.M408409200
   Steiner FA, 2015, CURR OPIN GENET DEV, V31, P28, DOI 10.1016/j.gde.2015.03.010
   Stuwe T, 2008, P NATL ACAD SCI USA, V105, P8884, DOI 10.1073/pnas.0712293105
   Subramanian V, 2013, PLOS GENET, V9, DOI 10.1371/journal.pgen.1003725
   Tachiwana H, 2011, NATURE, V476, P232, DOI 10.1038/nature10258
   Talbert PB, 2010, NAT REV MOL CELL BIO, V11, P264, DOI 10.1038/nrm2861
   Tessarz P, 2014, NAT REV MOL CELL BIO, V15, P703, DOI 10.1038/nrm3890
   Tomonaga T, 2003, CANCER RES, V63, P3511
   Tremethick DJ, 2007, CELL, V128, P651, DOI 10.1016/j.cell.2007.02.008
   VanDemark AP, 2008, J BIOL CHEM, V283, P5058, DOI 10.1074/jbc.M708682200
   VanDemark AP, 2006, MOL CELL, V22, P363, DOI 10.1016/j.molcel.2006.03.025
   Venkatesh S, 2015, NAT REV MOL CELL BIO, V16, P178, DOI 10.1038/nrm3941
   Wang AY, 2011, MOL CELL BIOL, V31, P3871, DOI 10.1128/MCB.05182-11
   Weber CM, 2014, GENE DEV, V28, P672, DOI 10.1101/gad.238873.114
   Weber CM, 2010, NAT STRUCT MOL BIOL, V17, P1500, DOI 10.1038/nsmb.1926
   Winkler DD, 2011, J BIOL CHEM, V286, P41883, DOI 10.1074/jbc.M111.301465
   Xin H, 2009, MOL CELL, V35, P365, DOI 10.1016/j.molcel.2009.06.024
   Yen KY, 2013, CELL, V154, P1246, DOI 10.1016/j.cell.2013.08.043
   Zheng S, 2014, MOL CELL BIOL, V34, P303, DOI 10.1128/MCB.00478-13
   Zucchi I, 2004, P NATL ACAD SCI USA, V101, P18147, DOI 10.1073/pnas.0408260101
NR 80
TC 6
Z9 6
U1 0
U2 6
PU WILEY
PI HOBOKEN
PA 111 RIVER ST, HOBOKEN 07030-5774, NJ USA
SN 0265-9247
EI 1521-1878
J9 BIOESSAYS
JI Bioessays
PD MAY
PY 2016
VL 38
IS 5
BP 420
EP 426
DI 10.1002/bies.201500122
PG 7
WC Biochemistry & Molecular Biology; Biology
WE Science Citation Index Expanded (SCI-EXPANDED)
SC Biochemistry & Molecular Biology; Life Sciences & Biomedicine - Other
   Topics
GA DK1ZS
UT WOS:000374715000003
PM 26990181
DA 2022-04-10
ER

PT J
AU Peschiaroli, A
   Scialpi, F
   Bernassola, F
   El Sherbini, E
   Melino, G
AF Peschiaroli, Angelo
   Scialpi, Flavia
   Bernassola, Francesca
   El Sherbini, El Said
   Melino, Gerry
TI The E3 ubiquitinationligase WWP1 regulates Delta Np63-dependent
   transcription through Lys63 linkages
SO BIOCHEMICAL AND BIOPHYSICAL RESEARCH COMMUNICATIONS
LA English
DT Article
DE Ubiquitin; HECT; ubiquitinationligase; p63; Transcription; Cell death; Skin;
   Epidermis
ID EPITHELIAL DEVELOPMENT; CANCER DEVELOPMENT; STEM-CELLS; P63; APOPTOSIS;
   ACTIVATION; P73; PROLIFERATION; DEGRADATION; EXPRESSION
AB The transcription factor p63, a member of the p53 family, plays a crucial role in epithelial development and tumorigenesis through the regulation of epithelial progenitor cell proliferation, differentiation and apoptosis. Similarly to p53, p63 activity is regulated by post-translational modification, including ubiquitination. Here, we report that the WWP1 E3 ubiquitinationligase binds specifically to Delta Np63 isoform but it does not trigger Delta Np63 proteasome-dependent degradation. Accordingly, we found that WWP1-dependent ubiquitination of Delta Np63 occurs through the formation of Lys63-linked poly-ubiquitinationchains. Importantly, we found that WWP1 is able to increase Delta Np63-dependent transcription and depletion of WWP1 in human primary keratinocytes induces cell cycle arrest. All together these results indicate that WWP1 regulates Delta Np63 transcriptional activity, acting thus as a potential regulator of the proliferation and survival of epithelial-derived cells. (C) 2010 Elsevier Inc. All rights reserved.
C1 [Peschiaroli, Angelo; Melino, Gerry] Univ Roma Tor Vergata, Dept Expt Med & Biochem Sci, IDI IRCCS Biochem Lab, I-00133 Rome, Italy.
   [Melino, Gerry] Univ Leicester, Toxicol Unit, MRC, Leicester LE1 9HN, Leics, England.
   [El Sherbini, El Said] Mansoura Univ, Fac Vet Med, Dept Biochem & Chem Nutr, Mansoura, Egypt.
RP Melino, G (corresponding author), Univ Roma Tor Vergata, Dept Expt Med & Biochem Sci, IDI IRCCS Biochem Lab, Via Montpellier 1, I-00133 Rome, Italy.
EM melino@uniroma2.it
OI elsherbini, elsaid/0000-0003-2720-8955; PESCHIAROLI,
   ANGELO/0000-0001-6311-2382
FU Medical Research Council, UKUK Research & Innovation (UKRI)Medical
   Research Council UK (MRC) [ACC12, ACC6]; MIUR/PRINMinistry of Education,
   Universities and Research (MIUR)Research Projects of National Relevance
   (PRIN) [RBIPO6LCA9_0023, 20078P7T3K_001]; AIRCFondazione AIRC per la
   ricerca sul cancro [2008-2010_33-08, 9202]; ISS "Program Italia-USA"
   [N526D5]; Italian Human ProteomeNet [RBRN07BMCT]; TelethonFondazione
   Telethon [GGP09133]; MRCUK Research & Innovation (UKRI)Medical Research
   Council UK (MRC) [MC_U132670600] Funding Source: UKRI; Medical Research
   CouncilUK Research & Innovation (UKRI)Medical Research Council UK
   (MRC)European Commission [MC_U132670600] Funding Source: researchfish
FX This work has been supported by the Medical Research Council, UK; grants
   from "Alleanza contro il Cancro" (ACC12 and ACC6), MIUR/PRIN
   (RBIPO6LCA9_0023), AIRC (2008-2010_33-08), ISS "Program Italia-USA"
   N526D5, Italian Human ProteomeNet RBRN07BMCT and Telethon (GGP09133) to
   G.M.; by "Young Italian Researchers Grant 2008" to AP and by the
   MIUR/PRIN grant 20078P7T3K_001 and AIRC grant 9202 awarded to F.B.
CR Adhikary S, 2005, CELL, V123, P409, DOI 10.1016/j.cell.2005.08.016
   Al-Hakim AK, 2008, BIOCHEM J, V411, P249, DOI 10.1042/BJ20080067
   Bai YL, 2004, MOL CELL, V15, P825, DOI 10.1016/j.molcel.2004.07.021
   Ben-Saadon R, 2006, MOL CELL, V24, P701, DOI 10.1016/j.molcel.2006.10.022
   Bernassola F, 2008, CANCER CELL, V14, P10, DOI 10.1016/j.ccr.2008.06.001
   Candi E, 2008, CELL MOL LIFE SCI, V65, P3126, DOI 10.1007/s00018-008-8119-x
   Candi E, 2006, CELL DEATH DIFFER, V13, P1037, DOI 10.1038/sj.cdd.4401926
   Chen C, 2007, ONCOGENE, V26, P2386, DOI 10.1038/sj.onc.1210021
   Chen CS, 2007, INT J CANCER, V121, P80, DOI 10.1002/ijc.22653
   Gallegos JR, 2008, J BIOL CHEM, V283, P66, DOI 10.1074/jbc.M704686200
   Geetha T, 2005, MOL CELL, V20, P301, DOI 10.1016/j.molcel.2005.09.014
   Gonfloni S, 2009, NAT MED, V15, P1179, DOI 10.1038/nm.2033
   Greer SF, 2003, NAT IMMUNOL, V4, P1074, DOI 10.1038/ni985
   Gressner O, 2005, EMBO J, V24, P2458, DOI 10.1038/sj.emboj.7600708
   Hershko A, 1998, ANNU REV BIOCHEM, V67, P425, DOI 10.1146/annurev.biochem.67.1.425
   HUIBREGTSE JM, 1995, P NATL ACAD SCI USA, V92, P5249, DOI 10.1073/pnas.92.11.5249-a
   Laine A, 2007, ONCOGENE, V26, P1477, DOI 10.1038/sj.onc.1209924
   Lamothe B, 2007, J BIOL CHEM, V282, P4102, DOI 10.1074/jbc.M609503200
   Leong CO, 2007, J CLIN INVEST, V117, P1370, DOI 10.1172/JCI30866
   Levrero M, 1999, CELL DEATH DIFFER, V6, P1146, DOI 10.1038/sj.cdd.4400624
   Levrero M, 2000, J CELL SCI, V113, P1661
   Li Y, 2008, CELL DEATH DIFFER, V15, P1941, DOI 10.1038/cdd.2008.134
   Martinez-Forero I, 2009, CLIN CANCER RES, V15, P6751, DOI 10.1158/1078-0432.CCR-09-1225
   Massion PP, 2004, CHEST, V125, p102S, DOI 10.1378/chest.125.5_suppl.102S-a
   Melino G, 2005, CELL DEATH DIFFER, V12, P1155, DOI 10.1038/sj.cdd.4401740
   Mills AA, 1999, NATURE, V398, P708, DOI 10.1038/19531
   Pellegrini G, 2001, P NATL ACAD SCI USA, V98, P3156, DOI 10.1073/pnas.061032098
   Peschiaroli A, 2009, ONCOGENE, V28, P3157, DOI 10.1038/onc.2009.177
   Rocco JW, 2006, CANCER CELL, V9, P45, DOI 10.1016/j.ccr.2005.12.013
   Rossi M, 2005, EMBO J, V24, P836, DOI 10.1038/sj.emboj.7600444
   Rossi M, 2006, P NATL ACAD SCI USA, V103, P12753, DOI 10.1073/pnas.0603449103
   Salghetti SE, 2001, SCIENCE, V293, P1651, DOI 10.1126/science.1062079
   Scialpi F, 2008, BIOCHEM PHARMACOL, V76, P1515, DOI 10.1016/j.bcp.2008.07.028
   Senoo M, 2007, CELL, V129, P523, DOI 10.1016/j.cell.2007.02.045
   Venuprasad K, 2008, NAT IMMUNOL, V9, P245, DOI 10.1038/ni1564
   Wegierski T, 2006, EMBO J, V25, P5659, DOI 10.1038/sj.emboj.7601429
   Yang A, 1999, NATURE, V398, P714, DOI 10.1038/19539
NR 37
TC 31
Z9 32
U1 0
U2 4
PU ACADEMIC PRESS INC ELSEVIER SCIENCE
PI SAN DIEGO
PA 525 B ST, STE 1900, SAN DIEGO, CA 92101-4495 USA
SN 0006-291X
EI 1090-2104
J9 BIOCHEM BIOPH RES CO
JI Biochem. Biophys. Res. Commun.
PD NOV 12
PY 2010
VL 402
IS 2
BP 425
EP 430
DI 10.1016/j.bbrc.2010.10.050
PG 6
WC Biochemistry & Molecular Biology; Biophysics
WE Science Citation Index Expanded (SCI-EXPANDED)
SC Biochemistry & Molecular Biology; Biophysics
GA 688PA
UT WOS:000284862300047
PM 20951678
DA 2022-04-10
ER

PT J
AU Canul-Tec, JC
   Assal, R
   Cirri, E
   Legrand, P
   Brier, S
   Chamot-Rooke, J
   Reyes, N
AF Canul-Tec, Juan C.
   Assal, Reda
   Cirri, Erica
   Legrand, Pierre
   Brier, Sebastien
   Chamot-Rooke, Julia
   Reyes, Nicolas
TI Structure and allosteric inhibition of excitatory amino acid transporter
   1
SO NATURE
LA English
DT Article
ID GLUTAMATE TRANSPORTER; RAT-BRAIN; ASPARTATE TRANSPORTER; SELECTIVE
   INHIBITOR; BINDING; SUBSTRATE; HOMOLOG; DOMAIN; GLT-1; TOPOLOGY
AB Human members of the solute carrier 1 (SLC1) family of transporters take up excitatory neurotransmitters in the brain and amino acids in peripheral organs. Dysregulation of the function of SLC1 transporters is associated with neurodegenerative disorders and cancer. Here we present crystal structures of a thermostabilized human SLC1 transporter, the excitatory amino acid transporter 1 (EAAT1), with and without allosteric and competitive inhibitor bound. The structures reveal architectural features of the human transporters, such as intra-and extracellular domains that have potential roles in transport function, regulation by lipids and post-translational modification. The coordination of the allosteric inhibitor in the structures and the change in the transporter dynamics measured by hydrogen-deuterium exchange mass spectrometry reveal a mechanism of inhibition, in which the transporter is locked in the outward-facing states of the transport cycle. Our results provide insights into the molecular mechanism underlying the function and pharmacology of human SLC1 transporters.
C1 [Canul-Tec, Juan C.; Assal, Reda; Cirri, Erica; Reyes, Nicolas] Inst Pasteur, Mol Mech Membrane Transport Lab, 25-28 Rue Docteur Roux, F-75015 Paris, France.
   [Canul-Tec, Juan C.; Assal, Reda; Cirri, Erica; Brier, Sebastien; Chamot-Rooke, Julia; Reyes, Nicolas] Inst Pasteur, CNRS, UMR 3528, 25-28 Rue Docteur Roux, F-75015 Paris, France.
   [Legrand, Pierre] Synchrotron SOLEIL, F-91192 Gif Sur Yvette, France.
   [Brier, Sebastien; Chamot-Rooke, Julia] Inst Pasteur, Struct Mass Spectrometry & Prote Unit, 25-28 Rue Docteur Roux, F-75015 Paris, France.
RP Reyes, N (corresponding author), Inst Pasteur, Mol Mech Membrane Transport Lab, 25-28 Rue Docteur Roux, F-75015 Paris, France.; Reyes, N (corresponding author), Inst Pasteur, CNRS, UMR 3528, 25-28 Rue Docteur Roux, F-75015 Paris, France.
EM nreyes@pasteur.fr
RI LEGRAND, Pierre/G-7709-2011; Brier, Sebastien/L-7787-2019; Brier,
   Sébastien/E-8558-2019; Chamot-Rooke, Julia/F-3644-2014
OI LEGRAND, Pierre/0000-0003-2431-2255; Brier,
   Sebastien/0000-0003-1758-8237; Canul Tec, Juan
   Carlos/0000-0003-0513-545X; Reyes, Nicolas/0000-0001-6618-8307;
   Chamot-Rooke, Julia/0000-0002-9427-543X
FU ERCEuropean Research Council (ERC)European Commission [309657]; G5
   Institut Pasteur funds; CACSICE grant [ANR-11-EQPX-008]; CNRSCentre
   National de la Recherche Scientifique (CNRS)European Commission
   [UMR3528]
FX We thank O. Boudker for comments on the manuscript and discussion on
   consensus mutagenesis; P.V. Krasteva for comments on the manuscript; A.
   Haouz and the staff at the crystallogenesis core facility of the
   Institut Pasteur for assistance with crystallization screens; Staff at
   Synchrotron SOLEIL and the European Synchrotron Radiation Facility for
   assistance with data collection; D. O'Brien for discussion of HDX
   results. The work was funded by the ERC Starting grant 309657 (N.R.).
   Further support from G5 Institut Pasteur funds (N.R.), CACSICE grant
   (ANR-11-EQPX-008), and CNRS UMR3528 (N.R., J.C.-R.) is acknowledged.
CR Abrahamsen B, 2013, J NEUROSCI, V33, P1068, DOI 10.1523/JNEUROSCI.3396-12.2013
   Akyuz N, 2015, NATURE, V518, P68, DOI 10.1038/nature14158
   Bailey CG, 2011, J CLIN INVEST, V121, P446, DOI 10.1172/JCI44474
   Blanc E, 2004, ACTA CRYSTALLOGR D, V60, P2210, DOI 10.1107/S0907444904016427
   Borre L, 2004, J BIOL CHEM, V279, P2513, DOI 10.1074/jbc.M311446200
   Boudker O, 2007, NATURE, V445, P387, DOI 10.1038/nature05455
   Brocke L, 2002, J BIOL CHEM, V277, P3985, DOI 10.1074/jbc.M107735200
   Butchbach MER, 2004, J BIOL CHEM, V279, P34388, DOI 10.1074/jbc.M403938200
   Chao XD, 2010, NEUROCHEM RES, V35, P1224, DOI 10.1007/s11064-010-0178-3
   Choi KD, 2017, J HUM GENET, V62, P443, DOI 10.1038/jhg.2016.137
   Crisman TJ, 2009, P NATL ACAD SCI USA, V106, P20752, DOI 10.1073/pnas.0908570106
   Danbolt NC, 2001, PROG NEUROBIOL, V65, P1, DOI 10.1016/S0301-0082(00)00067-8
   Emsley P, 2010, ACTA CRYSTALLOGR D, V66, P486, DOI 10.1107/S0907444910007493
   Evans PR, 2013, ACTA CRYSTALLOGR D, V69, P1204, DOI 10.1107/S0907444913000061
   Fairman WA, 1998, NAT NEUROSCI, V1, P105, DOI 10.1038/355
   Focke PJ, 2011, J NEUROSCI, V31, P6255, DOI 10.1523/JNEUROSCI.6096-10.2011
   Grewer C, 2004, J PHYSIOL-LONDON, V557, P747, DOI 10.1113/jphysiol.2004.062521
   Grunewald M, 1998, NEURON, V21, P623, DOI 10.1016/S0896-6273(00)80572-3
   Guskov A, 2016, NAT COMMUN, V7, DOI 10.1038/ncomms13420
   Hourdel V, 2016, BIOINFORMATICS, V32, P3413, DOI 10.1093/bioinformatics/btw420
   Jensen AA, 2009, J MED CHEM, V52, P912, DOI 10.1021/jm8013458
   Kabsch W, 2010, ACTA CRYSTALLOGR D, V66, P125, DOI 10.1107/S0907444909047337
   Kanai Y, 2003, EUR J PHARMACOL, V479, P237, DOI 10.1016/j.ejphar.2003.08.073
   Kawate T, 2006, STRUCTURE, V14, P673, DOI 10.1016/j.str.2006.01.013
   Konermann L, 2011, CHEM SOC REV, V40, P1224, DOI 10.1039/c0cs00113a
   Larsson HP, 2010, P NATL ACAD SCI USA, V107, P13912, DOI 10.1073/pnas.1006289107
   Lehre KP, 1998, J NEUROSCI, V18, P8751, DOI 10.1523/jneurosci.18-21-08751.1998
   Leinenweber A, 2011, J BIOL CHEM, V286, P1927, DOI 10.1074/jbc.M110.153486
   Mccoy AJ, 2007, J APPL CRYSTALLOGR, V40, P658, DOI 10.1107/S0021889807021206
   McIlwain BC, 2015, J BIOL CHEM, V290, P9780, DOI 10.1074/jbc.M114.630590
   O'Brien DP, 2015, SCI REP-UK, V5, DOI 10.1038/srep14223
   Pilc A, 2013, BIOL PSYCHIAT, V73, P1125, DOI 10.1016/j.biopsych.2013.01.021
   Qu SG, 2008, J BIOL CHEM, V283, P26391, DOI 10.1074/jbc.M802401200
   Raunser S, 2006, BIOPHYS J, V91, P3718, DOI 10.1529/biophysj.106.086900
   Reyes N, 2013, NAT STRUCT MOL BIOL, V20, P634, DOI 10.1038/nsmb.2548
   Reyes N, 2009, NATURE, V462, P880, DOI 10.1038/nature08616
   Robert SM, 2014, CELL MOL LIFE SCI, V71, P1839, DOI 10.1007/s00018-013-1521-z
   ROTHSTEIN JD, 1995, ANN NEUROL, V38, P73, DOI 10.1002/ana.410380114
   Ryan RM, 2010, J NEUROCHEM, V114, P565, DOI 10.1111/j.1471-4159.2010.06796.x
   Seal RP, 2000, NEURON, V25, P695, DOI 10.1016/S0896-6273(00)81071-5
   Seal RP, 1998, NEURON, V21, P1487, DOI 10.1016/S0896-6273(00)80666-2
   Shimamoto K, 2004, MOL PHARMACOL, V65, P1008, DOI 10.1124/mol.65.4.1008
   Shimamoto K, 2008, CHEM REC, V8, P182, DOI 10.1002/tcr.20145
   Shimizu K., BR J CANC, V110, P2030
   SHOUFFANI A, 1990, J BIOL CHEM, V265, P6002
   Slotboom DJ, 1999, MICROBIOL MOL BIOL R, V63, P293, DOI 10.1128/MMBR.63.2.293-307.1999
   STEIPE B, 1994, J MOL BIOL, V240, P188, DOI 10.1006/jmbi.1994.1434
   Tao Z, 2010, J BIOL CHEM, V285, P17725, DOI 10.1074/jbc.M110.121798
   van Geldermalsen M, 2016, ONCOGENE, V35, P3201, DOI 10.1038/onc.2015.381
   Wales TE, 2006, MASS SPECTROM REV, V25, P158, DOI 10.1002/mas.20064
   Wang Q, 2015, J PATHOL, V236, P278, DOI 10.1002/path.4518
   Wang Q, 2014, INT J CANCER, V135, P1060, DOI 10.1002/ijc.28749
   Waterhouse AM, 2009, BIOINFORMATICS, V25, P1189, DOI 10.1093/bioinformatics/btp033
   Watzke N, 2001, FEBS LETT, V503, P121, DOI 10.1016/S0014-5793(01)02715-6
   Winter N, 2012, BRAIN, V135, P3416, DOI 10.1093/brain/aws255
   Yernool D, 2004, NATURE, V431, P811, DOI 10.1038/nature03018
   Zerangue N, 1996, J BIOL CHEM, V271, P27991, DOI 10.1074/jbc.271.45.27991
   Zerangue N, 1996, NATURE, V383, P634, DOI 10.1038/383634a0
   Zhang YM, 1998, P NATL ACAD SCI USA, V95, P751, DOI 10.1073/pnas.95.2.751
NR 59
TC 120
Z9 120
U1 1
U2 80
PU NATURE PUBLISHING GROUP
PI LONDON
PA MACMILLAN BUILDING, 4 CRINAN ST, LONDON N1 9XW, ENGLAND
SN 0028-0836
EI 1476-4687
J9 NATURE
JI Nature
PD APR 27
PY 2017
VL 544
IS 7651
BP 446
EP +
DI 10.1038/nature22064
PG 18
WC Multidisciplinary Sciences
WE Science Citation Index Expanded (SCI-EXPANDED)
SC Science & Technology - Other Topics
GA ET1TN
UT WOS:000400051900036
PM 28424515
OA Green Submitted, Green Accepted
DA 2022-04-10
ER

PT J
AU Cheng, MM
   Hu, SR
   Wang, ZT
   Pei, YF
   Fan, R
   Liu, XQ
   Wang, L
   Zhou, J
   Zheng, SC
   Zhang, TY
   Lin, Y
   Zhang, MC
   Tao, R
   Zhong, J
AF Cheng, Mengmeng
   Hu, Shurong
   Wang, Zhengting
   Pei, Yaofei
   Fan, Rong
   Liu, Xiqiang
   Wang, Lei
   Zhou, Jie
   Zheng, Sichang
   Zhang, Tianyu
   Lin, Yun
   Zhang, Maochen
   Tao, Ran
   Zhong, Jie
TI Inhibition of neddylation regulates dendritic cell functions via Deptor
   accumulation driven mTOR inactivation
SO ONCOTARGET
LA English
DT Article
DE neddylation; dendritic cell; mTOR; Deptor; inflammatory bowel disease;
   Immunology and Microbiology Section; Immune response; Immunity
ID INFLAMMATORY-BOWEL-DISEASE; post-translational modification; COMMENSAL
   BACTERIA; ubiquitinationLIGASES; ACTIVATION; APOPTOSIS; CANCER; CULLIN;
   NEDD8; HYPOXIA
AB Neddylation, a newly identified post-translational modification, is significant for the activity and stability of target proteins. The exact role of neddylation in the pathogenesis of inflammatory bowel disease, specifically those mediated by dendritic cells (DCs), was still rarely reported. Here, we showed that inhibition of neddylation protected mice from mucosal inflammation. Targeting neddylation also inhibited DC maturation characterized by reduced cytokine production, down-regulated costimulatory molecules and suppressed capacity in allogeneic T cell stimulation. Additionally, inactivation of neddylation promotes caspase dependent apoptosis of DCs. These phenomena were attributed to the inactivation of mTOR, which was caused by Cullin-1 deneddylation induced Deptor accumulation. Together, our findings revealed that neddylation inhibition suppressed DC functions through mTOR signaling pathway and provided a potential therapeutic opportunity in inflammatory bowel diseases.
C1 [Cheng, Mengmeng; Hu, Shurong; Wang, Zhengting; Fan, Rong; Wang, Lei; Zhou, Jie; Zheng, Sichang; Zhang, Tianyu; Lin, Yun; Zhang, Maochen; Zhong, Jie] Shanghai Jiao Tong Univ, Sch Med, Ruijin Hosp, Dept Gastroenterol, Shanghai 200030, Peoples R China.
   [Pei, Yaofei; Liu, Xiqiang] Shanghai Jiao Tong Univ, Sch Med, Ruijin Hosp, Dept Surg, Shanghai 200030, Peoples R China.
   [Tao, Ran] Zhejiang Prov Peoples Hosp, Dept Hepatobiliary Pancreat Surg, Hangzhou, Zhejiang, Peoples R China.
RP Zhong, J (corresponding author), Shanghai Jiao Tong Univ, Sch Med, Ruijin Hosp, Dept Gastroenterol, Shanghai 200030, Peoples R China.
EM jimmyzj64@hotmail.com
FU Science & Technology department of Shanghai [13411950901]
FX This study was supported by Science & Technology department of Shanghai
   (13411950901).
CR Abida WM, 2007, J BIOL CHEM, V282, P1797, DOI 10.1074/jbc.M609001200
   Banchereau J, 1998, NATURE, V392, P245, DOI 10.1038/32588
   Berndt BE, 2007, J IMMUNOL, V179, P6255, DOI 10.4049/jimmunol.179.9.6255
   Bouma G, 2003, NAT REV IMMUNOL, V3, P521, DOI 10.1038/nri1132
   Cao WP, 2008, NAT IMMUNOL, V9, P1157, DOI 10.1038/ni.1645
   Chang FM, 2012, J BIOL CHEM, V287, P35756, DOI 10.1074/jbc.M112.397703
   Collier-Hyams LS, 2005, J IMMUNOL, V175, P4194, DOI 10.4049/jimmunol.175.7.4194
   Duda DM, 2008, CELL, V134, P995, DOI 10.1016/j.cell.2008.07.022
   Ehrentraut SF, 2012, INFLAMM BOWEL DIS, V18, P1378, DOI 10.1002/ibd.22859
   Evan GI, 2001, NATURE, V411, P342, DOI 10.1038/35077213
   Feng LJ, 2005, MOL CELL BIOL, V25, P5389, DOI 10.1128/MCB.25.13.5389-5395.2005
   Fiocchi C, 1998, GASTROENTEROLOGY, V115, P182, DOI 10.1016/S0016-5085(98)70381-6
   Frost V, 2001, J GEN VIROL, V82, P3057, DOI 10.1099/0022-1317-82-12-3057
   Gao DM, 2011, MOL CELL, V44, P290, DOI 10.1016/j.molcel.2011.08.030
   Gao F, 2006, NAT CELL BIOL, V8, P1171, DOI 10.1038/ncb1483
   Hanauer SB, 2006, INFLAMM BOWEL DIS, V12, pS3, DOI 10.1097/01.MIB.0000195385.19268.68
   Hart AL, 2005, GASTROENTEROLOGY, V129, P50, DOI 10.1053/j.gastro.2005.05.013
   Hart AL, 2004, GUT, V53, P1602, DOI 10.1136/gut.2003.037325
   Hertz CJ, 2001, J IMMUNOL, V166, P2444, DOI 10.4049/jimmunol.166.4.2444
   Hinz M, 1999, MOL CELL BIOL, V19, P2690
   Jantsch J, 2008, J IMMUNOL, V180, P4697, DOI 10.4049/jimmunol.180.7.4697
   Kadowaki N, 2001, J EXP MED, V194, P863, DOI 10.1084/jem.194.6.863
   Kumar A, 2009, J IMMUNOL, V182, P538, DOI 10.4049/jimmunol.182.1.538
   Kumar V, 2005, J NEUROSCI, V25, P11288, DOI 10.1523/JNEUROSCI.2284-05.2005
   Lin JJ, 2010, CANCER RES, V70, P10310, DOI 10.1158/0008-5472.CAN-10-2062
   Luo ZG, 2012, CANCER RES, V72, P3360, DOI 10.1158/0008-5472.CAN-12-0388
   Macpherson AJ, 2004, SCIENCE, V303, P1662, DOI 10.1126/science.1091334
   Mancino A, 2008, BLOOD, V112, P3723, DOI 10.1182/blood-2008-02-142091
   Mathewson N, 2013, BLOOD, V122, P2062, DOI 10.1182/blood-2013-02-486373
   Mellman I, 2001, CELL, V106, P255, DOI 10.1016/S0092-8674(01)00449-4
   Nagata Y, 1999, BLOOD, V94, P853, DOI 10.1182/blood.V94.3.853.415a12_853_863
   Pan ZQ, 2004, ONCOGENE, V23, P1985, DOI 10.1038/sj.onc.1207414
   Petroski MD, 2005, NAT REV MOL CELL BIO, V6, P9, DOI 10.1038/nrm1547
   Rabut G, 2008, EMBO REP, V9, P969, DOI 10.1038/embor.2008.183
   Ryu JH, 2011, J BIOL CHEM, V286, P6963, DOI 10.1074/jbc.M110.188706
   Sakata E, 2007, NAT STRUCT MOL BIOL, V14, P167, DOI 10.1038/nsmb1191
   Santambrogio L, 2005, NAT IMMUNOL, V6, P1020, DOI 10.1038/ni1250
   Semenza GL, 2001, CELL, V107, P1, DOI 10.1016/S0092-8674(01)00518-9
   Sufan RI, 2006, NEOPLASIA, V8, P956, DOI 10.1593/neo.06520
   Thomson AW, 2009, NAT REV IMMUNOL, V9, P324, DOI 10.1038/nri2546
   Tlaskalova-Hogenova H, 2004, IMMUNOL LETT, V93, P97, DOI 10.1016/j.imlet.2004.02.005
   Wang M, 2011, EXPERT OPIN THER TAR, V15, P253, DOI 10.1517/14728222.2011.550877
   XIA ZG, 1995, SCIENCE, V270, P1326, DOI 10.1126/science.270.5240.1326
   Zhao YC, 2012, NEOPLASIA, V14, P360, DOI 10.1593/neo.12532
NR 44
TC 15
Z9 18
U1 1
U2 7
PU IMPACT JOURNALS LLC
PI ORCHARD PARK
PA 6666 E QUAKER ST, STE 1, ORCHARD PARK, NY 14127 USA
EI 1949-2553
J9 ONCOTARGET
JI Oncotarget
PD JUN 14
PY 2016
VL 7
IS 24
BP 35643
EP 35654
DI 10.18632/oncotarget.9543
PG 12
WC Oncology; Cell Biology
WE Science Citation Index Expanded (SCI-EXPANDED)
SC Oncology; Cell Biology
GA DO4MJ
UT WOS:000377756800013
PM 27224922
OA Green Published, gold
DA 2022-04-10
ER

PT J
AU Kelliher, J
   Ghosal, G
   Leung, JWC
AF Kelliher, Jessica
   Ghosal, Gargi
   Leung, Justin Wai Chung
TI New answers to the old RIDDLE: RNF168 and the DNA damage response
   pathway
SO FEBS JOURNAL
LA English
DT Review; Early Access
DE DNA double&#8208; strand break; DNA repair; RIDDLE syndrome; RIDDLIN;
   ubiquitin
AB The chromatin-based DNA damage response pathway is tightly orchestrated by histone post-translational modification, including histone H2A ubiquitination. Ubiquitination plays an integral role in regulating cellular processes including DNA damage signaling and repair. The ubiquitinationE3 ligase RNF168 is essential in assembling a cohort of DNA repair proteins at the damaged chromatin via its enzymatic activity. RNF168 ubiquitinates histone H2A(X) at the N terminus and generates a specific docking scaffold for ubiquitin-binding motif-containing proteins. The regulation of RNF168 at damaged chromatin and the mechanistic implication in the recruitment of DNA repair proteins to the damaged sites remain an area of active investigation. Here, we review the function and regulation of RNF168 in the context of ubiquitin-mediated DNA damage signaling and repair. We will also discuss the unanswered questions that require further investigation and how understanding RNF168 targeting specificity could benefit the therapeutic development for cancer treatment.
C1 [Kelliher, Jessica; Leung, Justin Wai Chung] Univ Arkansas Med Sci, Coll Med, Dept Radiat Oncol, Little Rock, AR 72205 USA.
   [Ghosal, Gargi] Univ Nebraska Med Ctr, Dept Genet Cell Biol & Anat, Omaha, NE 68198 USA.
RP Leung, JWC (corresponding author), Univ Arkansas Med Sci, Coll Med, Dept Radiat Oncol, Little Rock, AR 72205 USA.; Ghosal, G (corresponding author), Univ Nebraska Med Ctr, Dept Genet Cell Biol & Anat, Omaha, NE 68198 USA.
EM gargi.ghosal@unmc.edu; jwleung@uams.edu
OI Leung, Justin Wai Chung/0000-0003-4601-390X; Ghosal,
   Gargi/0000-0001-8399-5354
FU NIHUnited States Department of Health & Human ServicesNational
   Institutes of Health (NIH) - USA [NCI: K22CA204354, R01CA244261, NIGMS:
   R35GM137798, P20GM121293]; Arkansas Breast Cancer Research Program
   [AWD00053730, AWD00054499]; American Cancer SocietyAmerican Cancer
   Society [RSG-20-131-01-DMC]; NIGMS COBRE [P20GM121316]; NIGMS COBRE
   (NCI) [K22CA188181]
FX J.L. is supported by grants from NIH (NCI: K22CA204354, R01CA244261,
   NIGMS: R35GM137798, and P20GM121293; J.L. as project leader), Arkansas
   Breast Cancer Research Program (AWD00053730 and AWD00054499), and
   American Cancer Society (RSG-20-131-01-DMC). G.G is supported by NIGMS
   COBRE (P20GM121316; G.G. as project leader and NCI K22CA188181). We
   thank Halle Mallard for proofreading the manuscript. We apologize to all
   the studies we did not reference due to space constraints.
CR Akutsu M, 2016, J CELL SCI, V129, P875, DOI 10.1242/jcs.183954
   Al-Hakim A, 2010, DNA REPAIR, V9, P1229, DOI 10.1016/j.dnarep.2010.09.011
   Alatwi HE, 2015, EMBO REP, V16, P986, DOI 10.15252/embr.201540330
   Schmid JA, 2018, MOL CELL, V71, P897, DOI 10.1016/j.molcel.2018.07.011
   Ashkenazy H, 2016, NUCLEIC ACIDS RES, V44, pW344, DOI 10.1093/nar/gkw408
   Bartocci Cristina, 2013, Frontiers in Genetics, V4, P128, DOI 10.3389/fgene.2013.00128
   Becker JR., 2020, BARD1 LINKS HIST H2A
   Bekker-Jensen S, 2010, DNA REPAIR, V9, P1219, DOI 10.1016/j.dnarep.2010.09.010
   Bohgaki M, 2013, P NATL ACAD SCI USA, V110, P20982, DOI 10.1073/pnas.1320302111
   Campbell SJ, 2012, J BIOL CHEM, V287, P23900, DOI 10.1074/jbc.M112.359653
   Chahwan R, 2013, CELL CYCLE, V12, P1000, DOI 10.4161/cc.23947
   Chapman JR, 2012, MOL CELL, V47, P497, DOI 10.1016/j.molcel.2012.07.029
   Chroma K, 2017, ONCOGENE, V36, P2405, DOI 10.1038/onc.2016.392
   Ciccia A, 2010, MOL CELL, V40, P179, DOI 10.1016/j.molcel.2010.09.019
   Coleman KA, 2011, J BIOL CHEM, V286, P13669, DOI 10.1074/jbc.M110.213728
   Dantuma NP, 2016, EMBO J, V35, P6, DOI 10.15252/embj.201592595
   Devgan SS, 2011, CELL DEATH DIFFER, V18, P1500, DOI 10.1038/cdd.2011.18
   Doil C, 2009, CELL, V136, P435, DOI 10.1016/j.cell.2008.12.041
   Fradet-Turcotte A, 2013, NATURE, V499, P50, DOI 10.1038/nature12318
   French ME, 2021, CELL DISCOV, V7, DOI 10.1038/s41421-020-00237-y
   FUJIMURO M, 1994, FEBS LETT, V349, P173, DOI 10.1016/0014-5793(94)00647-4
   Gatti M, 2015, CELL REP, V10, P226, DOI 10.1016/j.celrep.2014.12.021
   Gatti M, 2012, CELL CYCLE, V11, P2538, DOI 10.4161/cc.20919
   Gobbini E, 2013, DNA REPAIR, V12, P791, DOI 10.1016/j.dnarep.2013.07.009
   Gudjonsson T, 2012, CELL, V150, P697, DOI 10.1016/j.cell.2012.06.039
   Guturi KKN, 2016, NAT COMMUN, V7, DOI 10.1038/ncomms12638
   Her J, 2016, ACTA BIOCH BIOPH SIN, V48, P658, DOI 10.1093/abbs/gmw047
   Horn V, 2019, NAT COMMUN, V10, DOI 10.1038/s41467-019-09756-z
   House NCM, 2014, FRONT GENET, V5, DOI 10.3389/fgene.2014.00296
   Hu Q, 2017, MOL CELL, V66, P473, DOI 10.1016/j.molcel.2017.04.009
   Hu YD, 2011, GENE DEV, V25, P685, DOI 10.1101/gad.2011011
   Jackson SP, 2009, NATURE, V461, P1071, DOI 10.1038/nature08467
   Kanaar R, 2008, EMBO J, V27, P581, DOI 10.1038/emboj.2008.11
   Kelliher JL, 2020, NAT COMMUN, V11, DOI 10.1038/s41467-020-16307-4
   Khurana S, 2014, CELL REP, V8, P1049, DOI 10.1016/j.celrep.2014.07.024
   Kim J, 2018, MOL CELL, V69, P36, DOI 10.1016/j.molcel.2017.11.021
   Kongsema M, 2016, ONCOGENESIS, V5, DOI 10.1038/oncsis.2016.57
   Krais JJ, 2020, CANCER RES, V80, P2848, DOI 10.1158/0008-5472.CAN-19-3033
   Krais JJ, 2020, NUCLEIC ACIDS RES, V48, P4298, DOI 10.1093/nar/gkaa154
   Lancini C, 2014, J EXP MED, V211, P1759, DOI 10.1084/jem.20131436
   Lee JH, 2004, SCIENCE, V304, P93, DOI 10.1126/science.1091496
   Leung JW, 2014, PLOS GENET, V10, DOI 10.1371/journal.pgen.1004178
   Lilley CE, 2010, EMBO J, V29, P943, DOI 10.1038/emboj.2009.400
   Lombardi PM, 2017, J MOL MED, V95, P799, DOI 10.1007/s00109-017-1561-1
   Luijsterburg MS, 2017, ELIFE, V6, P1, DOI 10.7554/eLife.20922
   Lukas J, 2011, NAT CELL BIOL, V13, P1161, DOI 10.1038/ncb2344
   Mallette FA, 2012, EMBO J, V31, P1865, DOI 10.1038/emboj.2012.47
   Mattiroli F, 2014, NAT COMMUN, V5, DOI 10.1038/ncomms4291
   Mattiroli F, 2012, CELL, V150, P1182, DOI 10.1016/j.cell.2012.08.005
   Mosbech A, 2013, J BIOL CHEM, V288, P16579, DOI 10.1074/jbc.M113.459917
   Munoz MC, 2014, NUCLEIC ACIDS RES, V42, P7720, DOI 10.1093/nar/gku421
   Munoz MC, 2012, J BIOL CHEM, V287, P40618, DOI 10.1074/jbc.M112.410951
   Nakamura K, 2006, DNA REPAIR, V5, P741, DOI 10.1016/j.dnarep.2006.03.008
   Nicassio F, 2007, CURR BIOL, V17, P1972, DOI 10.1016/j.cub.2007.10.034
   Nowsheen S, 2018, NAT CELL BIOL, V20, P455, DOI 10.1038/s41556-018-0071-x
   Panier S, 2012, MOL CELL, V47, P383, DOI 10.1016/j.molcel.2012.05.045
   Peng JM, 2003, NAT BIOTECHNOL, V21, P921, DOI 10.1038/nbt849
   Pietrucha B, 2017, FRONT IMMUNOL, V8, DOI 10.3389/fimmu.2017.01683
   Pinato S, 2011, MOL CELL BIOL, V31, P118, DOI 10.1128/MCB.00818-10
   Pinato S, 2009, BMC MOL BIOL, V10, DOI 10.1186/1471-2199-10-55
   Polo SE, 2011, GENE DEV, V25, P409, DOI 10.1101/gad.2021311
   Savage KI, 2015, FEBS J, V282, P630, DOI 10.1111/febs.13150
   Schwertman P, 2016, NAT REV MOL CELL BIO, V17, P379, DOI 10.1038/nrm.2016.58
   Scully R, 2019, NAT REV MOL CELL BIO, V20, P698, DOI 10.1038/s41580-019-0152-0
   Sebastian R, 2020, MOL CELL, V79, P836, DOI 10.1016/j.molcel.2020.06.028
   Sen Nkwe N, 2020, J CELL SCI, V133, DOI 10.1242/jcs.239236
   Sharma N, 2014, CELL CYCLE, V13, P106, DOI 10.4161/cc.26814
   Sitz J, 2019, P NATL ACAD SCI USA, V116, P19552, DOI 10.1073/pnas.1906102116
   Sobhian B, 2007, SCIENCE, V316, P1198, DOI 10.1126/science.1139516
   Stewart GS, 2007, P NATL ACAD SCI USA, V104, P16910, DOI 10.1073/pnas.0708408104
   Stewart GS, 2009, CELL, V136, P420, DOI 10.1016/j.cell.2008.12.042
   Stucki M, 2005, CELL, V123, P1213, DOI 10.1016/j.cell.2005.09.038
   Swaney DL, 2015, EMBO REP, V16, P1131, DOI 10.15252/embr.201540298
   Swatek KN, 2016, CELL RES, V26, P399, DOI 10.1038/cr.2016.39
   Sy SMH, 2011, J BIOL CHEM, V286, P22355, DOI 10.1074/jbc.M111.232041
   Symington LS, 2011, ANNU REV GENET, V45, P247, DOI 10.1146/annurev-genet-110410-132435
   Takahashi TS, 2018, NAT COMMUN, V9, DOI 10.1038/s41467-017-02345-y
   Thorslund T, 2015, NATURE, V527, P389, DOI 10.1038/nature15401
   Typas D, 2016, NUCLEIC ACIDS RES, V44, P2976, DOI 10.1093/nar/gkv1480
   Uckelmann M, 2018, NAT COMMUN, V9, DOI 10.1038/s41467-017-02653-3
   Uckelmann M, 2017, DNA REPAIR, V56, P92, DOI 10.1016/j.dnarep.2017.06.011
   Uziel T, 2003, EMBO J, V22, P5612, DOI 10.1093/emboj/cdg541
   van Attikum H, 2009, TRENDS CELL BIOL, V19, P207, DOI 10.1016/j.tcb.2009.03.001
   Walser F, 2020, MOL CELL, V80, P423, DOI 10.1016/j.molcel.2020.09.017
   Wang ZQ, 2016, GENE DEV, V30, P946, DOI 10.1101/gad.271841.115
   Wei Y, 2014, PLOS ONE, V9, DOI 10.1371/journal.pone.0097028
   Weitzman MD, 2011, FEBS LETT, V585, P2897, DOI 10.1016/j.febslet.2011.04.049
   Weitzman MD, 2010, ANNU REV MICROBIOL, V64, P61, DOI 10.1146/annurev.micro.112408.134016
   Xu Y, 2012, MOL CELL, V48, P723, DOI 10.1016/j.molcel.2012.09.026
   Yu M, 2016, J BIOL CHEM, V291, P959, DOI 10.1074/jbc.M114.624478
   Zhang XQ, 2013, CELL CYCLE, V12, P312, DOI 10.4161/cc.23104
   Zhang Z, 2014, J BIOL CHEM, V289, DOI 10.1074/jbc.M114.599605
   Zong DL, 2019, MOL CELL, V73, P1267, DOI 10.1016/j.molcel.2018.12.010
NR 93
TC 2
Z9 2
U1 0
U2 3
PU WILEY
PI HOBOKEN
PA 111 RIVER ST, HOBOKEN 07030-5774, NJ USA
SN 1742-464X
EI 1742-4658
J9 FEBS J
JI FEBS J.
DI 10.1111/febs.15857
EA APR 2021
PG 14
WC Biochemistry & Molecular Biology
WE Science Citation Index Expanded (SCI-EXPANDED)
SC Biochemistry & Molecular Biology
GA RN7QD
UT WOS:000640547000001
PM 33797206
OA Bronze
DA 2022-04-10
ER

PT J
AU Li, FZ
   Han, HC
   Sun, QQ
   Liu, K
   Lin, N
   Xu, CZ
   Zhao, ZJ
   Zhao, WH
AF Li, Fangzhou
   Han, Haichao
   Sun, Qianqian
   Liu, Kun
   Lin, Ning
   Xu, Chenzhong
   Zhao, Zijun
   Zhao, Wenhui
TI USP28 regulates deubiquitination of histone H2A and cell proliferation
SO EXPERIMENTAL CELL RESEARCH
LA English
DT Article
DE Deubiquitinases; USP28; Histone H2A; Cell proliferation
ID ubiquitination; PROGRESSION; COUNTERACTS; GAMMA-H2AX; SENESCENCE; RNF168
AB post-translational modification of the histone H2A represent an important mechanism by which cells modulate the structure and function of chromatin. Ubiquitination at K119 of histone H2A is associated transcriptional repression, which is shown to be regulated by deubiquitinases (DUBs). Here, we performed a screen to identify novel DUBs for histone H2A. Although RNAi-mediated knockdown of USP28, USP32 and USP36 showed that their depletion resulted in the increase of ub-K119-H2A, only USP28-depleted cells showed increased cell proliferation. Notably, USP28 knockdown cells had decreased expression of p53, p21 and p16(INK4a), suggesting that the effect of USP28 on cell proliferation was mediated by regulating the expression of p53, p21 and p16(INK4a). In summary, we have shown that USP28 is a deubiquitinase for histone H2A and is involved in regulation of cell proliferation. Thus, USP28 represents a potentially novel therapeutic target for cancer.
C1 [Li, Fangzhou; Han, Haichao; Sun, Qianqian; Liu, Kun; Lin, Ning; Xu, Chenzhong; Zhao, Zijun; Zhao, Wenhui] Peking Univ, Hlth Sci Ctr, Beijing Key Lab Prot Posttranslat Modificat & Cel, 38 Xueyuan Rd, Beijing 100191, Peoples R China.
RP Zhao, WH (corresponding author), Peking Univ, Hlth Sci Ctr, 38 Xueyuan St, Beijing 100191, Peoples R China.
EM zhao6025729@bjmu.edu.cn
RI Li, Fangzhou/R-8789-2019
OI ZHAO, WENHUI/0000-0002-7703-7106
FU National Natural Science Foundation of ChinaNational Natural Science
   Foundation of China (NSFC) [85141044]
FX This work was supported by National Natural Science Foundation of China
   (No. 85141044).
CR Abbadie C, 2017, CELL MOL LIFE SCI, V74, P4471, DOI 10.1007/s00018-017-2587-9
   Belle JI, 2014, INT J BIOCHEM CELL B, V50, P161, DOI 10.1016/j.biocel.2014.03.004
   Cole MA, 2018, J CELL COMMUN SIGNAL, V12, P35, DOI 10.1007/s12079-018-0459-1
   de Napoles M, 2004, DEV CELL, V7, P663, DOI 10.1016/j.devcel.2004.10.005
   Fang J, 2004, J BIOL CHEM, V279, P52812, DOI 10.1074/jbc.C400493200
   Fischle W, 2003, CURR OPIN CELL BIOL, V15, P172, DOI 10.1016/S0955-0674(03)00013-9
   Jin B, 2014, AGING CELL, V13, P879, DOI 10.1111/acel.12249
   Kouzarides T, 2007, CELL, V128, P693, DOI 10.1016/j.cell.2007.02.005
   Mosbech A, 2013, J BIOL CHEM, V288, P16579, DOI 10.1074/jbc.M113.459917
   Nicassio F, 2007, CURR BIOL, V17, P1972, DOI 10.1016/j.cub.2007.10.034
   Nijman SMB, 2005, CELL, V123, P773, DOI 10.1016/j.cell.2005.11.007
   Pan H, 2015, INT J BIOCHEM CELL B, V60, P176, DOI 10.1016/j.biocel.2015.01.001
   Rehman SAA, 2016, MOL CELL, V63, P146, DOI 10.1016/j.molcel.2016.05.009
   Shan J, 2009, MOL CELL, V36, P469, DOI 10.1016/j.molcel.2009.10.018
   Sharma N, 2014, CELL CYCLE, V13, P106, DOI 10.4161/cc.26814
   Strahl BD, 2000, NATURE, V403, P41, DOI 10.1038/47412
   Strahl C, 2000, BEHAV RES THER, V38, P863, DOI 10.1016/S0005-7967(99)00102-3
   Yu M, 2016, J BIOL CHEM, V291, P959, DOI 10.1074/jbc.M114.624478
   Zhang XY, 2008, CELL CYCLE, V7, P1522, DOI 10.4161/cc.7.11.5962
   2008, GENE DEV, V22, P37, DOI DOI 10.1101/GAD.1609708
   2003, P NATL ACAD SCI USA, V100, P2468, DOI DOI 10.1073/PNAS.0434312100
   2014, NATURE, V516, P116, DOI DOI 10.1038/NATURE13955
   2016, CELL REP, V17, P3099, DOI DOI 10.1016/J.CELREP.2016.11.063
   1999, P NATL ACAD SCI US, V96, P2828
   2017, IMMUNOLOGY, V151, P110, DOI DOI 10.1111/IMM.12710
   2007, NATURE, V449, P1068, DOI DOI 10.1038/NATURE06256
   2007, J CELL BIOL, V178, P219, DOI DOI 10.1083/JCB.200612127
   2005, MOL CELL, V20, P845, DOI DOI 10.1016/J.MOLCEL.2005.12.002
   2011, J BIOL CHEM, V286, P7190, DOI DOI 10.1074/JBC.M110.158311
NR 29
TC 5
Z9 5
U1 0
U2 13
PU ELSEVIER INC
PI SAN DIEGO
PA 525 B STREET, STE 1900, SAN DIEGO, CA 92101-4495 USA
SN 0014-4827
EI 1090-2422
J9 EXP CELL RES
JI Exp. Cell Res.
PD JUN 1
PY 2019
VL 379
IS 1
BP 11
EP 18
DI 10.1016/j.yexcr.2019.03.026
PG 8
WC Oncology; Cell Biology
WE Science Citation Index Expanded (SCI-EXPANDED)
SC Oncology; Cell Biology
GA HU9WR
UT WOS:000465645500002
PM 30910399
DA 2022-04-10
ER

PT J
AU Nie, WN
   Yan, LY
   Lee, YH
   Guha, C
   Kurland, IJ
   Lu, HT
AF Nie, Wenna
   Yan, Leyu
   Lee, Yie H.
   Guha, Chandan
   Kurland, Irwin J.
   Lu, Haitao
TI Advanced mass spectrometry-based multi-omics technologies for exploring
   the pathogenesis of hepatocellular carcinoma
SO MASS SPECTROMETRY REVIEWS
LA English
DT Review
DE hepatocellular carcinoma; omics technology; metabolomics; proteomics;
   RNA modifications; DNA damage adducts
ID DIFFERENTIAL PROTEOMIC ANALYSIS; CHRONIC HEPATITIS-B; INDUCED
   dna damage; RNA MODIFICATION; SERUM biomarkersS; OXIDATIVE STRESS;
   gene expression; RISK-FACTOR; IDENTIFICATION; METABOLOMICS
AB Hepatocellular carcinoma (HCC) is one of the primary hepatic malignancies and is the third most common cause of cancer related death worldwide. Although a wealth of knowledge has been gained concerning the initiation and progression of HCC over the last half century, efforts to improve our understanding of its pathogenesis at a molecular level are still greatly needed, to enable clinicians to enhance the standards of the current diagnosis and treatment of HCC. In the post-genome era, advanced mass spectrometry driven multi-omics technologies (e.g., profiling of DNA damage adducts, RNA modification profiling, proteomics, and metabolomics) stand at the interface between chemistry and biology, and have yielded valuable outcomes from the study of a diversity of complicated diseases. Particularly, these technologies are being broadly used to dissect various biological aspects of HCC with the purpose of biomarkers discovery, interrogating pathogenesis as well as for therapeutic discovery. This proof of knowledge-based critical review aims at exploring the selected applications of those defined omics technologies in the HCC niche with an emphasis on translational applications driven by advanced mass spectrometry, toward the specific clinical use for HCC patients. This approach will enable the biomedical community, through both basic research and the clinical sciences, to enhance the applicability of mass spectrometry-based omics technologies in dissecting the pathogenesis of HCC and could lead to novel therapeutic discoveries for HCC. (c) 2014 Wiley Periodicals, Inc. Mass Spec Rev 35:331-349, 2016.
C1 [Nie, Wenna; Yan, Leyu; Lu, Haitao] Chongqing Univ, Innovat Drug Res Ctr, Sch Chem & Chem Engn, Chongqing 401331, Peoples R China.
   [Lee, Yie H.] Singapore MIT Alliance Res & Technol, Interdisciplinary Res Grp Infect Dis, Singapore 138602, Singapore.
   [Guha, Chandan] Montefiore Med Ctr, Dept Radiat Oncol, New York, NY 10461 USA.
   [Guha, Chandan] Albert Einstein Coll Med, Dept Med, New York, NY 10461 USA.
   [Kurland, Irwin J.] Albert Einstein Coll Med, Diabet Res & Training Ctr, Stable Isotope & Metabol Core Facil, Dept Med, New York, NY 10461 USA.
   [Lu, Haitao] Queensland Univ Technol, Inst Hlth & Biomed Innovat, Tissue Repair & Regenerat Program, Kelvin Grove, Qld 4059, Australia.
RP Lu, HT (corresponding author), Chongqing Univ, Innovat Drug Res Ctr, Sch Chem & Chem Engn, Chongqing 401331, Peoples R China.
EM haitao.lu@cqu.edu.cn
RI Lu, Haitao/K-9940-2016
OI Lu, Haitao/0000-0002-5293-4206
FU Natural Science Foundation of ChinaNational Natural Science Foundation
   of China (NSFC) [81274175]; Startup Funding for "Hundred Young-Talent
   Scheme" Professorship by the Chongqing University in China
   [0236011104401]; QUT Vice Chancellor Research Fellowships
   [150410-0070/08]; Diabetes Research and Training Center (DRTC),
   NIHUnited States Department of Health & Human ServicesNational
   Institutes of Health (NIH) - USA [P60DK020541]; NIAIDUnited States
   Department of Health & Human ServicesNational Institutes of Health (NIH)
   - USANIH National Institute of Allergy & Infectious Diseases (NIAID)
   [U19AI091175-01];  [DK58132-01A2]; NATIONAL INSTITUTE OF ALLERGY AND
   INFECTIOUS DISEASESUnited States Department of Health & Human
   ServicesNational Institutes of Health (NIH) - USANIH National Institute
   of Allergy & Infectious Diseases (NIAID) [U19AI091175] Funding Source:
   NIH RePORTER; NATIONAL INSTITUTE OF DIABETES AND DIGESTIVE AND KIDNEY
   DISEASESUnited States Department of Health & Human ServicesNational
   Institutes of Health (NIH) - USANIH National Institute of Diabetes &
   Digestive & Kidney Diseases (NIDDK) [R01DK058132, P60DK020541] Funding
   Source: NIH RePORTER
FX H.L. was supported by the Natural Science Foundation of China Grant
   (81274175), the Startup Funding for "Hundred Young-Talent Scheme"
   Professorship provided by the Chongqing University in China
   (0236011104401), the QUT Vice Chancellor Research Fellowships
   (150410-0070/08). I.J.K. was supported by DK58132-01A2 and Diabetes
   Research and Training Center (DRTC), NIH grant P60DK020541, I.J.K. and
   C.G. was supported by NIAID grant U19AI091175-01.
CR Abdalla MA, 2012, J CANCER, V3, P390, DOI 10.7150/jca.4280
   Aebersold R, 2003, NATURE, V422, P198, DOI 10.1038/nature01511
   Agris PF, 2007, J MOL BIOL, V366, P1, DOI 10.1016/j.jmb.2006.11.046
   Barsnes H, 2009, NAT BIOTECHNOL, V27, P598, DOI 10.1038/nbt0709-598
   Bjork GR, 1999, FEBS LETT, V452, P47, DOI 10.1016/S0014-5793(99)00528-1
   Budhu A, 2013, GASTROENTEROLOGY, V144, P1066, DOI 10.1053/j.gastro.2013.01.054
   Cantara WA, 2011, NUCLEIC ACIDS RES, V39, pD195, DOI 10.1093/nar/gkq1028
   Chan CTY, 2012, NAT COMMUN, V3, DOI 10.1038/ncomms1938
   Chan CTY, 2010, PLOS GENET, V6, DOI 10.1371/journal.pgen.1001247
   Chen F, 2011, ANAL BIOANAL CHEM, V401, P1899, DOI 10.1007/s00216-011-5245-3
   Chen T, 2011, MOL CELL PROTEOMICS, V10
   Chignard N, 2004, GASTROENTEROLOGY, V127, pS120, DOI 10.1053/j.gastro.2004.09.025
   Chionh YH, 2013, NUCLEIC ACIDS RES, V41, DOI 10.1093/nar/gkt668
   Chuma M, 2008, J GASTROEN HEPATOL, V23, P1431, DOI 10.1111/j.1440-1746.2008.05502.x
   Chung YT, 2008, TOXICOL LETT, V183, P21, DOI 10.1016/j.toxlet.2008.09.013
   Clayton TA, 2006, NATURE, V440, P1073, DOI 10.1038/nature04648
   Codarin E, 2009, J PROTEOME RES, V8, P2273, DOI 10.1021/pr8009275
   Corona G, 2010, INT J ONCOL, V36, P93, DOI 10.3892/ijo_00000479
   Cox J, 2007, CELL, V130, P395, DOI 10.1016/j.cell.2007.07.032
   Craig JR, 2002, HEPATOLOGY TXB LIVER, V2, P1355
   Cravatt BF, 2007, NATURE, V450, P991, DOI 10.1038/nature06525
   Cui JF, 2004, J CANCER RES CLIN, V130, P615, DOI 10.1007/s00432-004-0576-5
   D'Alessandro LA, 2013, FRONT PHYSIOL, V4, DOI 10.3389/fphys.2013.00028
   Dominissini D, 2012, NATURE, V485, P201, DOI 10.1038/nature11112
   Dunin-Horkawicz S, 2006, NUCLEIC ACIDS RES, V34, pD145, DOI 10.1093/nar/gkj084
   El-Aneed A, 2006, ANTICANCER RES, V26, P3293
   Fan ST, 2000, J GASTROEN HEPATOL, V15, pE181, DOI 10.1046/j.1440-1746.2000.02119.x
   Farber E, 1996, CLIN LAB MED, V16, P377
   Feitelson MA, 2002, ONCOGENE, V21, P2593, DOI 10.1038/sj.onc.1205434
   Feitelson MA, 2002, CLIN LAB MED, V16, P377
   Gronbaek Henning, 2006, Ugeskr Laeger, V168, P1219
   Gstaiger M, 2009, NAT REV GENET, V10, P617, DOI 10.1038/nrg2633
   Holmes E, 2008, NATURE, V453, P396, DOI 10.1038/nature06882
   Hu J, 2011, PLOS ONE, V6, DOI 10.1371/journal.pone.0026003
   Jia GF, 2011, NAT CHEM BIOL, V7, P885, DOI [10.1038/nchembio.687, 10.1038/NCHEMBIO.687]
   Khan Dilshad H., 2012, Advances in Biological Regulation, V52, P377, DOI 10.1016/j.jbior.2012.04.003
   Kurland IJ, 2013, ANN NY ACAD SCI, V1287, P1, DOI 10.1111/nyas.12116
   Lee IN, 2005, J PROTEOME RES, V4, P2062, DOI 10.1021/pr0502018
   Lee JS, 2004, GASTROENTEROLOGY, V127, pS51, DOI 10.1053/j.gastro.2004.09.015
   Lee YH, 2010, MASS SPECTROM REV, V29, P179, DOI 10.1002/mas.20226
   Li ZQ, 2012, CELL BIOL INT, V36, P427, DOI 10.1042/CBI20100851
   LIMBACH PA, 1994, NUCLEIC ACIDS RES, V22, P2183, DOI 10.1093/nar/22.12.2183
   Lleonart ME, 2005, CANCER EPIDEM BIOMAR, V14, P2956, DOI 10.1158/1055-9965.EPI-05-0612
   Lv HT, 2013, MASS SPECTROM REV, V32, P118, DOI 10.1002/mas.21354
   Machnicka MA, 2013, NUCLEIC ACIDS RES, V41, pD262, DOI 10.1093/nar/gks1007
   McCloskey JA, 1998, NUCLEIC ACIDS RES, V26, P196, DOI 10.1093/nar/26.1.196
   Meng Zhaojing, 2006, Briefings in Functional Genomics & Proteomics, V5, P87, DOI 10.1093/bfgp/ell012
   Murakami Y, 2006, ONCOGENE, V25, P2537, DOI 10.1038/sj.onc.1209283
   Nishimura S, 1977, Tanpakushitsu Kakusan Koso, V22 Spec No, P922
   Ohata K, 2004, J GASTROEN HEPATOL, V19, P670, DOI 10.1111/j.1440-1746.2004.03360.x
   Orimo T, 2008, HEPATOLOGY, V48, P1851, DOI 10.1002/hep.22552
   Patterson AD, 2011, CANCER RES, V71, P6590, DOI 10.1158/0008-5472.CAN-11-0885
   Poirier MC, 2004, NAT REV CANCER, V4, P630, DOI 10.1038/nrc1410
   Poirier MC, 2012, DISCOV MED, V14, P283
   Poulsen HE, 2012, FREE RADICAL BIO MED, V52, P1353, DOI 10.1016/j.freeradbiomed.2012.01.009
   Ressom HW, 2012, ANAL CHIM ACTA, V743, P90, DOI 10.1016/j.aca.2012.07.013
   Santamaria E, 2006, J PROTEOME RES, V5, P944, DOI 10.1021/pr050429v
   Schafer DF, 1999, LANCET, V353, P1253, DOI 10.1016/S0140-6736(98)09148-X
   Schaffer SW, 2013, ADV EXP MED BIOL, V776, P153, DOI 10.1007/978-1-4614-6093-0_16
   Schagdarsurengin U, 2003, ONCOGENE, V22, P1866, DOI 10.1038/sj.onc.1206338
   Sharma VK, 2011, INT J MASS SPECTROM, V304, P172, DOI 10.1016/j.ijms.2010.10.003
   Song BC, 2002, CANCER-AM CANCER SOC, V94, P175, DOI 10.1002/cncr.10170
   Sreekumar A, 2009, NATURE, V457, P910, DOI 10.1038/nature07762
   Sun W, 2007, MOL CELL PROTEOMICS, V6, P1798, DOI 10.1074/mcp.M600449-MCP200
   Suzuki T, 2007, METHOD ENZYMOL, V425, P211, DOI 10.1016/S0076-6876(07)25009-8
   Tan YX, 2012, MOL CELL PROTEOMICS, V11, DOI 10.1074/mcp.M111.010694
   Uccello M, 2012, HEPAT MON, V12, DOI 10.5812/hepatmon.5943
   Urbonavicius J, 2001, EMBO J, V20, P4863, DOI 10.1093/emboj/20.17.4863
   Uto H, 2010, PROTEOME SCI, V8, DOI 10.1186/1477-5956-8-70
   Wang BH, 2012, J PROTEOME RES, V11, P1217, DOI 10.1021/pr2009252
   Wang LY, 1998, AM J EPIDEMIOL, V147, P315
   Wang W, 2009, DIGEST DIS SCI, V54, P2729, DOI 10.1007/s10620-008-0667-2
   Wang XJ, 2014, LIVER INT, V34, P759, DOI 10.1111/liv.12301
   Wang XJ, 2013, HEPATOLOGY, V57, P2072, DOI 10.1002/hep.26130
   Weerapana E, 2010, NATURE, V468, P790, DOI 10.1038/nature09472
   Wei S, 2012, METABOLITES, V2, P701, DOI 10.3390/metabo2040701
   Wu WY, 2012, J INVEST SURG, V25, P37, DOI 10.3109/08941939.2011.603816
   Xiao JF, 2012, J PROTEOME RES, V11, P5914, DOI 10.1021/pr300673x
   Xue RY, 2008, RAPID COMMUN MASS SP, V22, P3061, DOI 10.1002/rcm.3708
   Yang F, 2011, HEPATOLOGY, V54, P1679, DOI 10.1002/hep.24563
   Yarian C, 2002, J BIOL CHEM, V277, P16391, DOI 10.1074/jbc.M200253200
   Ye GZ, 2012, J PROTEOME RES, V11, P4361, DOI 10.1021/pr300502v
   Yoo BK, 2011, HEPATOLOGY, V53, P1538, DOI 10.1002/hep.24216
NR 83
TC 26
Z9 26
U1 4
U2 78
PU WILEY
PI HOBOKEN
PA 111 RIVER ST, HOBOKEN 07030-5774, NJ USA
SN 0277-7037
EI 1098-2787
J9 MASS SPECTROM REV
JI Mass Spectrom. Rev.
PD MAY-JUN
PY 2016
VL 35
IS 3
BP 331
EP 349
DI 10.1002/mas.21439
PG 19
WC Spectroscopy
WE Science Citation Index Expanded (SCI-EXPANDED)
SC Spectroscopy
GA DI8EJ
UT WOS:000373733800001
PM 24890331
DA 2022-04-10
ER

PT S
AU Sperandio, M
AF Sperandio, Markus
GP Annals NY Acad Sci
TI The expanding role of a2-3 sialylation for leukocyte trafficking in vivo
SO GLYCOBIOLOGY OF THE IMMUNE RESPONSE
SE Annals of the New York Academy of Sciences
LA English
DT Article; Book Chapter
DE sialylation; ST3Gal-IV; selectin; CXCR2; leukocyte recruitment
ID SELECTIN-LIGAND BIOSYNTHESIS; GLYCOSYLATION; INFLAMMATION; SPECIFICITY;
   DIVERSITY; IMMUNITY; BINDING; GENES; MICE
AB The ability of leukocytes to navigate through the different body compartments is an essential component for functioning immune defense and surveillance systems. In order to exit the blood circulation, leukocytes follow distinct recruitment steps, including capture of free-flowing leukocytes to, and rolling along, the vessel wall; firm leukocyte arrest on the endothelial lining; and postarrest modifications ( spreading and crawling), which prepare the leukocyte for transmigration through the vascular wall. Post-translational glycosylation ( including sialylation) has been known for many years to be functionally relevant for selectin ligands and, hence, selectin-mediated capture and rolling. Recently, sialylation by the alpha 2-3 sialyltransferase ST3Gal-IV was identified to significantly influence chemokine-triggered firmleukocyte arrest, expanding the role of alpha 2-3 sialylation from leukocyte rolling to subsequent chemokine-triggered leukocyte arrest. These findings make ST3Gal-IV an interesting drug target for modulating leukocyte trafficking in human disorders, including autoimmune diseases and cancer.
C1 Univ Munich, Walter Brendel Ctr Expt Med, D-81377 Munich, Germany.
RP Sperandio, M (corresponding author), Univ Munich, Walter Brendel Ctr Expt Med, Marchioninistr 15, D-81377 Munich, Germany.
EM markus.sperandio@med.uni-muenchen.de
OI Sperandio, Markus/0000-0002-7689-3613
CR Asano M, 2003, BLOOD, V102, P1678, DOI 10.1182/blood-2003-03-0836
   Bannert N, 2001, J EXP MED, V194, P1661, DOI 10.1084/jem.194.11.1661
   BUTCHER EC, 1991, CELL, V67, P1033, DOI 10.1016/0092-8674(91)90279-8
   Ellies LG, 2002, BLOOD, V100, P3618, DOI 10.1182/blood-2002-04-1007
   Ellies LG, 1998, IMMUNITY, V9, P881, DOI 10.1016/S1074-7613(00)80653-6
   Farzan M, 1999, CELL, V96, P667, DOI 10.1016/S0092-8674(00)80577-2
   Feng CG, 2011, J LEUKOCYTE BIOL, V90, P313, DOI 10.1189/jlb.1210708
   Frommhold D, 2008, J EXP MED, V205, P1435, DOI 10.1084/jem.20070846
   Harduin-Lepers A, 2005, GLYCOBIOLOGY, V15, P805, DOI 10.1093/glycob/cwi063
   Ley K, 2007, NAT REV IMMUNOL, V7, P678, DOI 10.1038/nri2156
   Ley K, 2008, HANDBOOK OF PHYSIOLOGY: MICROCIRCULATION, 2ND EDITION, P387
   Maly P, 1996, CELL, V86, P643, DOI 10.1016/S0092-8674(00)80137-3
   Marth JD, 2008, NAT REV IMMUNOL, V8, P874, DOI 10.1038/nri2417
   Mora JR, 2006, TRENDS IMMUNOL, V27, P235, DOI 10.1016/j.it.2006.03.007
   Okajima T, 1999, J BIOL CHEM, V274, P11479, DOI 10.1074/jbc.274.17.11479
   Seko A, 2003, J BIOL CHEM, V278, P9150, DOI 10.1074/jbc.M211480200
   Sperandio M, 2001, BLOOD, V97, P3812, DOI 10.1182/blood.V97.12.3812
   Sperandio M, 2006, EUR J IMMUNOL, V36, P3207, DOI 10.1002/eji.200636157
   Sperandio M, 2006, FEBS J, V273, P4377, DOI 10.1111/j.1742-4658.2006.05437.x
   Sperandio M, 2009, IMMUNOL REV, V230, P97, DOI 10.1111/j.1600-065X.2009.00795.x
   SPRINGER TA, 1994, CELL, V76, P301, DOI 10.1016/0092-8674(94)90337-9
   Takashima S, 2008, BIOSCI BIOTECH BIOCH, V72, P1155, DOI 10.1271/bbb.80025
   Tenno M, 2007, MOL CELL BIOL, V27, P8783, DOI 10.1128/MCB.01204-07
   Videira PA, 2008, GLYCOCONJUGATE J, V25, P259, DOI 10.1007/s10719-007-9092-6
   Weninger W, 2000, IMMUNITY, V12, P665, DOI 10.1016/S1074-7613(00)80217-4
   Woodard-Grice AV, 2008, J BIOL CHEM, V283, P26364, DOI 10.1074/jbc.M800836200
NR 26
TC 10
Z9 10
U1 0
U2 4
PU BLACKWELL SCIENCE PUBL
PI OXFORD
PA OSNEY MEAD, OXFORD OX2 0EL, ENGLAND
SN 0077-8923
BN 978-1-57331-839-6
J9 ANN NY ACAD SCI
JI Ann.NY Acad.Sci.
PY 2012
VL 1253
BP 201
EP 205
DI 10.1111/j.1749-6632.2011.06271.x
PG 5
WC Biochemistry & Molecular Biology; Immunology; Multidisciplinary Sciences
WE Book Citation Index – Science (BKCI-S); Science Citation Index Expanded (SCI-EXPANDED)
SC Biochemistry & Molecular Biology; Immunology; Science & Technology -
   Other Topics
GA BAU74
UT WOS:000305567700018
PM 22257379
DA 2022-04-10
ER

PT J
AU Cho, BG
   Peng, WJ
   Mechref, Y
AF Cho, Byeong Gwan
   Peng, Wenjing
   Mechref, Yehia
TI Separation of Permethylated O-Glycans, Free Oligosaccharides, and
   Glycosphingolipid-Glycans Using Porous Graphitized Carbon (PGC) Column
SO METABOLITES
LA English
DT Article
DE glycomics; LC-MS; PGC; glycosphingolipids; free oligosaccharides;
   O-glycans
ID LC-MS/MS ANALYSIS; N-GLYCANS; GLYCOSYLATION; IDENTIFICATION;
   GLYCOPROTEINS; QUANTITATION; biomarkersS
AB Glycosylation is one of the most common and complex post-translational modification of proteins. However, there are other carbohydrates such as free oligosaccharides and glycosphingolipids-glycans that are associated with important biological and clinical roles. To analyze these molecules using liquid chromatography coupled with mass spectrometry (LC-MS), the permethylation approach was utilized. Although permethylation is a commonly utilized glycan derivatization technique, separation of permethylated glycans released from glycosphingolipid (GSL) by LC-MS has never been previously demonstrated. Here, a nanoflow porous graphitized carbon (PGC) column coupled with a high-resolution mass spectrometer was used to achieve isomeric separation of these permethylated glycans. We demonstrate the separation of free reducing end and reduced end O-glycans, free oligosaccharides derived from human milk, and GSL glycans derived from the MDA-MB-231BR cancer cell line using PGC-LC-MS.
C1 [Cho, Byeong Gwan; Peng, Wenjing; Mechref, Yehia] Texas Tech Univ, Dept Chem & Biochem, Lubbock, TX 79409 USA.
RP Mechref, Y (corresponding author), Texas Tech Univ, Dept Chem & Biochem, Lubbock, TX 79409 USA.
EM andrew.cho@ttu.edu; wenjing.peng@ttu.edu; yehia.mechref@ttu.edu
OI Cho, Andrew/0000-0003-2792-2382
FU National Institutes of Health (NIH)United States Department of Health &
   Human ServicesNational Institutes of Health (NIH) - USA
   [1R01GM112490-04, 1R01GM130091-01, 1U01CA225753-01]
FX This research was funded by National Institutes of Health (NIH),
   1R01GM112490-04, 1R01GM130091-01, and 1U01CA225753-01.
CR Albrecht S, 2016, ANAL CHEM, V88, P4795, DOI 10.1021/acs.analchem.6b00259
   Ashwood C, 2019, ANALYST, V144, P3601, DOI 10.1039/c9an00486f
   Ayechu-Muruzabal V, 2018, FRONT PEDIATR, V6, DOI 10.3389/fped.2018.00239
   Barrientos RC, 2019, ANAL CHEM, V91, P9673, DOI 10.1021/acs.analchem.9b01206
   Benktander JD, 2018, J AM SOC MASS SPECTR, V29, P1125, DOI 10.1007/s13361-018-1933-y
   Bermingham ML, 2018, DIABETES CARE, V41, P79, DOI 10.2337/dc17-1042
   Colley K.J., 2015, ESSENTIALS GLYCOBIOL, P41, DOI DOI 10.1101/GLYCOBIOLOGY.3E.004
   Costello CE, 2007, J AM SOC MASS SPECTR, V18, P1799, DOI 10.1016/j.jasms.2007.07.016
   Cummings RD, 2014, CHEM BIOL, V21, P1, DOI 10.1016/j.chembiol.2013.12.010
   de Vreede G, 2018, DEV CELL, V45, P595, DOI 10.1016/j.devcel.2018.05.012
   Dong X, 2019, ANAL CHEM, V91, P11794, DOI 10.1021/acs.analchem.9b02411
   Dong X, 2018, ELECTROPHORESIS, V39, P3063, DOI 10.1002/elps.201800273
   Dong X, 2016, ELECTROPHORESIS, V37, P1532, DOI 10.1002/elps.201500561
   Everest-Dass AV, 2018, EXPERT REV PROTEOMIC, V15, P341, DOI 10.1080/14789450.2018.1448710
   Gautam S, 2020, ANALYST, V145, P6656, DOI 10.1039/d0an00314j
   Goetz JA, 2009, ANAL CHEM, V81, P9546, DOI 10.1021/ac901363h
   Guo HB, 2015, ADV CANCER RES, V126, P281, DOI 10.1016/bs.acr.2014.11.006
   Hart GW, 2010, CELL, V143, P672, DOI 10.1016/j.cell.2010.11.008
   Huang YF, 2017, ELECTROPHORESIS, V38, P2160, DOI 10.1002/elps.201700025
   Huang YP, 2002, RAPID COMMUN MASS SP, V16, P1199, DOI 10.1002/rcm.701
   Jin CS, 2019, ANAL CHEM, V91, P10604, DOI 10.1021/acs.analchem.9b01772
   Kailemia MJ, 2017, ANAL BIOANAL CHEM, V409, P395, DOI 10.1007/s00216-016-9880-6
   Kizuka Y, 2017, BBA-GEN SUBJECTS, V1861, P2447, DOI 10.1016/j.bbagen.2017.04.012
   Li QY, 2020, NAT PROTOC, V15, P2668, DOI 10.1038/s41596-020-0350-4
   Mank M, 2019, ANAL BIOANAL CHEM, V411, P231, DOI 10.1007/s00216-018-1434-7
   Mechref Y, 2012, ELECTROPHORESIS, V33, P1755, DOI 10.1002/elps.201100715
   Mehta A, 2015, ADV CANCER RES, V126, P257, DOI 10.1016/bs.acr.2014.11.005
   Moriguchi T, 2010, NEUROMUSCULAR DISORD, V20, P597, DOI 10.1016/j.nmd.2010.07.010
   Pan S, 2016, WORLD J GASTROENTERO, V22, P9288, DOI 10.3748/wjg.v22.i42.9288
   Peng WJ, 2019, J PROTEOME RES, V18, P3731, DOI 10.1021/acs.jproteome.9b00429
   Porfirio S, 2020, GLYCOBIOLOGY, V30, P774, DOI 10.1093/glycob/cwaa028
   Reily C, 2019, NAT REV NEPHROL, V15, P346, DOI 10.1038/s41581-019-0129-4
   Schedin-Weiss S, 2014, FEBS J, V281, P46, DOI 10.1111/febs.12590
   Sola RJ, 2009, J PHARM SCI-US, V98, P1223, DOI 10.1002/jps.21504
   Sperandio M, 2009, IMMUNOL REV, V230, P97, DOI 10.1111/j.1600-065X.2009.00795.x
   Varki A, 2015, ESSENTIALS GLYCOBIOL, P77
   Walls AC, 2020, CELL, V181, P281, DOI [10.1016/j.cell.2020.02.058, 10.1016/j.cell.2020.11.032]
   Wooding KM, 2016, CURR PHARM BIOTECHNO, V17, P788, DOI 10.2174/1389201017666160401145012
   Xiao KJ, 2018, RAPID COMMUN MASS SP, V32, P142, DOI 10.1002/rcm.8023
   Xu GG, 2020, ANAL CHEM, V92, P3758, DOI 10.1021/acs.analchem.9b05103
   Xu G, 2017, J NUTR, V147, P117, DOI 10.3945/jn.116.238279
   Zhang T, 2020, MOL OMICS, V16, P355, DOI 10.1039/c9mo00180h
   Zhang T, 2019, FRONT IMMUNOL, V10, DOI 10.3389/fimmu.2019.00090
   Zhou SY, 2017, ANALYST, V142, P4446, DOI 10.1039/c7an01262d
   Zhou SY, 2017, ANAL CHEM, V89, P6590, DOI 10.1021/acs.analchem.7b00747
   Zhou SY, 2017, ANAL BIOANAL CHEM, V409, P453, DOI 10.1007/s00216-016-9996-8
NR 46
TC 4
Z9 4
U1 7
U2 16
PU MDPI
PI BASEL
PA ST ALBAN-ANLAGE 66, CH-4052 BASEL, SWITZERLAND
EI 2218-1989
J9 METABOLITES
JI Metabolites
PD NOV
PY 2020
VL 10
IS 11
AR 433
DI 10.3390/metabo10110433
PG 12
WC Biochemistry & Molecular Biology
WE Science Citation Index Expanded (SCI-EXPANDED)
SC Biochemistry & Molecular Biology
GA OW9VM
UT WOS:000593225900001
PM 33121051
OA Green Published
DA 2022-04-10
ER

PT J
AU Sasaki, T
   Gan, EC
   Wakeham, A
   Kornbluth, S
   Mak, TW
   Okada, H
AF Sasaki, Toru
   Gan, Eugene C.
   Wakeham, Andrew
   Kornbluth, Sally
   Mak, Tak W.
   Okada, Hitoshi
TI HLA-B-associated transcript 3 (Bat3)/Scythe is essential for
   p300-mediated acetylation of p53
SO GENES & DEVELOPMENT
LA English
DT Article
DE Bat3/Scythe; p53; p300; acetylation; apoptosis; gene targeting
ID MAJOR HISTOCOMPATIBILITY COMPLEX; DAMAGE-INDUCED PHOSPHORYLATION;
   WILD-TYPE P53; dna damage; C-TERMINUS; post-translational modification;
   DROSOPHILA-REAPER; TUMOR-SUPPRESSOR; IN-VIVO; BINDING
AB In response to DNA damage, p53 undergoes post-translational modification (including acetylation) that are critical for its transcriptional activity. However, the mechanism by which p53 acetylation is regulated is still unclear. Here, we describe an essential role for HLA-B-associated transcript 3 (Bat3)/Scythe in controlling the acetylation of p53 required for DNA damage responses. Depletion of Bat3 from human and mouse cells markedly impairs p53-mediated transactivation of its target genes Puma and p21. Although DNA damage-induced phosphorylation, stabilization, and nuclear accumulation of p53 are not significantly affected by Bat3 depletion, p53 acetylation is almost completely abolished. Bat3 forms a complex with p300, and an increased amount of Bat3 enhances the recruitment of p53 to p300 and facilitates subsequent p53 acetylation. In contrast, Bat3-depleted cells show reduced p53-p300 complex formation and decreased p53 acetylation. Furthermore, consistent with our in vitro findings, thymocytes from Bat3-deficient mice exhibit reduced induction of puma and p21, and are resistant to DNA damage-induced apoptosis in vivo. Our data indicate that Bat3 is a novel and essential regulator of p53-mediated responses to genotoxic stress, and that Bat3 controls DNA damage-induced acetylation of p53.
C1 Univ Hlth Network, CFIBCR, OCI, Toronto, ON M5G 2C1, Canada.
   Duke Univ, Med Ctr, Dept Pharmacol & Canc Biol, Durham, NC 27710 USA.
   Univ Toronto, Dept Med Biophys, Toronto, ON M5G 2C1, Canada.
   Univ Toronto, Dept Immunol, Toronto, ON M5G 2C1, Canada.
RP Okada, H (corresponding author), Univ Hlth Network, CFIBCR, OCI, Toronto, ON M5G 2C1, Canada.
EM hokada@uhnres.utoronto.ca
FU NIGMS NIH HHSUnited States Department of Health & Human ServicesNational
   Institutes of Health (NIH) - USANIH National Institute of General
   Medical Sciences (NIGMS) [R01 GM061919, R01 GM61919] Funding Source:
   Medline; NATIONAL INSTITUTE OF GENERAL MEDICAL SCIENCESUnited States
   Department of Health & Human ServicesNational Institutes of Health (NIH)
   - USANIH National Institute of General Medical Sciences (NIGMS)
   [R01GM061919] Funding Source: NIH RePORTER
CR Ahn J, 2001, NAT STRUCT BIOL, V8, P730, DOI 10.1038/nsb0901-730
   ANDREWS NC, 1991, NUCLEIC ACIDS RES, V19, P2499, DOI 10.1093/nar/19.9.2499
   Appella E, 2001, EUR J BIOCHEM, V268, P2764, DOI 10.1046/j.1432-1327.2001.02225.x
   Avantaggiati ML, 1997, CELL, V89, P1175, DOI 10.1016/S0092-8674(00)80304-9
   Ayed A, 2001, NAT STRUCT BIOL, V8, P756, DOI 10.1038/nsb0901-756
   BANERJI J, 1990, P NATL ACAD SCI USA, V87, P2374, DOI 10.1073/pnas.87.6.2374
   Barlev NA, 2001, MOL CELL, V8, P1243, DOI 10.1016/S1097-2765(01)00414-2
   Brooks CL, 2003, CURR OPIN CELL BIOL, V15, P164, DOI 10.1016/S0955-0674(03)00003-6
   Bunz F, 1998, SCIENCE, V282, P1497, DOI 10.1126/science.282.5393.1497
   Chen DL, 2005, CELL, V121, P1071, DOI 10.1016/j.cell.2005.03.037
   Chen XB, 1996, GENE DEV, V10, P2438, DOI 10.1101/gad.10.19.2438
   Colon-Ramos DA, 2003, MOL BIOL CELL, V14, P4162, DOI 10.1091/mbc.E03-03-0139
   Desmots F, 2005, MOL CELL BIOL, V25, P10329, DOI 10.1128/MCB.25.23.10329-10337.2005
   Dornan D, 2004, NATURE, V429, P86, DOI 10.1038/nature02514
   Erster S, 2004, MOL CELL BIOL, V24, P6728, DOI 10.1128/MCB.24.15.6728-6741.2004
   Espinosa JM, 2001, MOL CELL, V8, P57, DOI 10.1016/S1097-2765(01)00283-0
   Feng LJ, 2005, MOL CELL BIOL, V25, P5389, DOI 10.1128/MCB.25.13.5389-5395.2005
   Fojta M, 2004, EUR J BIOCHEM, V271, P3865, DOI 10.1111/j.1432-1033.2004.04323.x
   Goodman RH, 2000, GENE DEV, V14, P1553
   Goyal L, 2000, EMBO J, V19, P589, DOI 10.1093/emboj/19.4.589
   Gu W, 1997, CELL, V90, P595, DOI 10.1016/S0092-8674(00)80521-8
   Haupt Y, 1997, NATURE, V387, P296, DOI 10.1038/387296a0
   Hirao A, 2000, SCIENCE, V287, P1824, DOI 10.1126/science.287.5459.1824
   Hoffman WH, 2002, J BIOL CHEM, V277, P3247, DOI 10.1074/jbc.M106643200
   Honda R, 1997, FEBS LETT, V420, P25, DOI 10.1016/S0014-5793(97)01480-4
   Ito A, 2001, EMBO J, V20, P1331, DOI 10.1093/emboj/20.6.1331
   Ito M, 1999, MOL CELL, V3, P361, DOI 10.1016/S1097-2765(00)80463-3
   IVANOV I, 2006, ONCOGENE
   Iwakuma T, 2003, MOL CANCER RES, V1, P993
   Jeffers JR, 2003, CANCER CELL, V4, P321, DOI 10.1016/S1535-6108(03)00244-7
   Kaeser MD, 2004, ONCOGENE, V23, P4007, DOI 10.1038/sj.onc.1207536
   Kaku S, 2001, NUCLEIC ACIDS RES, V29, P1989, DOI 10.1093/nar/29.9.1989
   Kislinger T, 2006, CELL, V125, P173, DOI 10.1016/j.cell.2006.01.044
   Krummel KA, 2005, P NATL ACAD SCI USA, V102, P10188, DOI 10.1073/pnas.0503068102
   Kubbutat MHG, 1997, NATURE, V387, P299, DOI 10.1038/387299a0
   Kumar R, 2004, BIOCHEM BIOPH RES CO, V323, P1293, DOI 10.1016/j.bbrc.2004.09.006
   Leng RP, 2003, CELL, V112, P779, DOI 10.1016/S0092-8674(03)00193-4
   Levine AJ, 1997, CELL, V88, P323, DOI 10.1016/S0092-8674(00)81871-1
   Li MY, 2002, J BIOL CHEM, V277, P50607, DOI 10.1074/jbc.C200578200
   Lill NL, 1997, NATURE, V387, P823, DOI 10.1038/42981
   Liu YG, 2004, CANCER BIOL THER, V3, P1102, DOI 10.4161/cbt.3.11.1189
   LOWE SW, 1993, NATURE, V362, P847, DOI 10.1038/362847a0
   Luo JY, 2004, P NATL ACAD SCI USA, V101, P2259, DOI 10.1073/pnas.0308762101
   Manchen ST, 2001, BIOCHEM BIOPH RES CO, V287, P1075, DOI 10.1006/bbrc.2001.5701
   McCarthy JV, 1998, J BIOL CHEM, V273, P24009, DOI 10.1074/jbc.273.37.24009
   McKinney K, 2004, MOL CELL, V16, P413, DOI 10.1016/j.molcel.2004.09.032
   McKinney K, 2002, MOL CELL BIOL, V22, P6797, DOI 10.1128/MCB.22.19.6797-6808.2002
   Okada H, 2002, MOL CELL BIOL, V22, P3509, DOI 10.1128/MCB.22.10.3509-3517.2002
   Olivier M, 2002, HUM MUTAT, V19, P607, DOI 10.1002/humu.10081
   Palecek E, 2004, ONCOGENE, V23, P2119, DOI 10.1038/sj.onc.1207324
   Prives C, 1999, J PATHOL, V187, P112
   Rodriguez MS, 2000, MOL CELL BIOL, V20, P8458, DOI 10.1128/MCB.20.22.8458-8467.2000
   Sakaguchi K, 1998, GENE DEV, V12, P2831, DOI 10.1101/gad.12.18.2831
   Shieh SY, 1997, CELL, V91, P325, DOI 10.1016/S0092-8674(00)80416-X
   SPIES T, 1989, SCIENCE, V243, P214, DOI 10.1126/science.2911734
   Thress K, 1999, EMBO J, V18, P5486, DOI 10.1093/emboj/18.20.5486
   Thress K, 1998, EMBO J, V17, P6135, DOI 10.1093/emboj/17.21.6135
   Thress K, 2001, EMBO J, V20, P1033, DOI 10.1093/emboj/20.5.1033
   Tibbetts RS, 1999, GENE DEV, V13, P152, DOI 10.1101/gad.13.2.152
   Villunger A, 2003, SCIENCE, V302, P1036, DOI 10.1126/science.1090072
   Vogelstein B, 2000, NATURE, V408, P307, DOI 10.1038/35042675
   Vousden KH, 2002, NAT REV CANCER, V2, P594, DOI 10.1038/nrc864
   Wei G, 2005, J BIOL CHEM, V280, P12271, DOI 10.1074/jbc.M409522200
   WIJSMAN JH, 1993, J HISTOCHEM CYTOCHEM, V41, P7, DOI 10.1177/41.1.7678025
   Wu YH, 2004, J BIOL CHEM, V279, P19264, DOI 10.1074/jbc.M307049200
   Yang XJ, 1996, NATURE, V382, P319, DOI 10.1038/382319a0
   [No title captured]
NR 67
TC 102
Z9 107
U1 0
U2 2
PU COLD SPRING HARBOR LAB PRESS, PUBLICATIONS DEPT
PI WOODBURY
PA 500 SUNNYSIDE BLVD, WOODBURY, NY 11797-2924 USA
SN 0890-9369
J9 GENE DEV
JI Genes Dev.
PD APR 1
PY 2007
VL 21
IS 7
BP 848
EP 861
DI 10.1101/gad.1534107
PG 14
WC Cell Biology; Developmental Biology; Genetics & Heredity
WE Science Citation Index Expanded (SCI-EXPANDED)
SC Cell Biology; Developmental Biology; Genetics & Heredity
GA 152XZ
UT WOS:000245396900011
PM 17403783
OA Green Published, gold
DA 2022-04-10
ER

PT J
AU Kataoka, H
   Kume, N
   Miyamoto, S
   Minami, M
   Murase, T
   Sawamura, T
   Masaki, T
   Hashimoto, N
   Kita, T
AF Kataoka, H
   Kume, N
   Miyamoto, S
   Minami, M
   Murase, T
   Sawamura, T
   Masaki, T
   Hashimoto, N
   Kita, T
TI Biosynthesis and post-translational processing of lectin-like oxidized
   low density lipoprotein receptor-1 (LOX-1) - N-linked glycosylation
   affects cell-surface expression and ligand binding
SO JOURNAL OF BIOLOGICAL CHEMISTRY
LA English
DT Article
ID VASCULAR ENDOTHELIAL-CELLS; HUMAN THYROTROPIN RECEPTOR;
   INSULIN-RECEPTOR; SCAVENGER RECEPTOR; LDL RECEPTOR-1; ALPHA-SUBUNIT;
   BETA-SUBUNIT; E-SELECTIN; OLIGOSACCHARIDES; MACROPHAGES
AB LOX-1 (lectin-like oxidized low density lipoprotein receptor-1) is a type II membrane protein belonging to the C-type lectin family that can act as a cell-surface receptor for atherogenic oxidized low density lipoprotein (Ox-LDL) and may play crucial roles in atherogenesis. In this study, we show, by pulse-chase labeling and glycosidase digestion, that LOX-1 is synthesized as a 40-kDa precursor protein with N-linked high mannose carbohydrate chains (pre-LOX-1), which is subsequently further glycosylated and processed into the 48-kDa mature form within 40 min, Furthermore, when treated with an N-glycosylation inhibitor, tunicamycin, both tumor necrosis factor-alpha-activated bovine aortic endothelial cells and CHO-K1 cells stably expressing bovine LOX-1 (BLOX-1-CHO) exclusively produced a 32-kDa deglycosylated form of LOX-1, Cell enzyme-linked immunosorbent assay, flow cytometry, and immunofluorescence confocal microscopy demonstrated that the deglycosylated form of LOX-1 is not efficiently transported to the cell surface, but is retained in the endoplasmic reticulum or Golgi apparatus in tumor necrosis factor-alpha-activated bovine aortic endothelial cells, but not in BLOX-1-CHO cells. Radiolabeled Ox-LDL binding studies revealed that the deglycosylated form of LOX-1 expressed on the cell surface of BLOX-1-CHO cells has a reduced affinity for Ox-LDL binding, Taken together, N-linked glycosylation appears to play key roles in the cell-surface expression and ligand binding of LOX-1.
C1 Kyoto Univ, Grad Sch Med, Dept Geriatr Med, Sakyo Ku, Kyoto 6068507, Japan.
   Kyoto Univ, Grad Sch Med, Dept Neurosurg, Sakyo Ku, Kyoto 6068507, Japan.
   Natl Cardiovasc Ctr, Res Inst, Dept Biosci, Osaka 5658565, Japan.
RP Kume, N (corresponding author), Kyoto Univ, Grad Sch Med, Dept Geriatr Med, Sakyo Ku, 54 Kawahara Cho, Kyoto 6068507, Japan.
RI Sawamura, Tatsuya/E-7103-2010
OI Kataoka, Hiroharu/0000-0001-8507-7557
CR ASANO T, 1993, FEBS LETT, V324, P258, DOI 10.1016/0014-5793(93)80129-I
   BASTIAN W, 1993, DIABETES, V42, P966, DOI 10.2337/diabetes.42.7.966
   BRADFORD MM, 1976, ANAL BIOCHEM, V72, P248, DOI 10.1016/0003-2697(76)90527-3
   CHOCHOLA J, 1993, J BIOL CHEM, V268, P2312
   COLLIER E, 1993, BIOCHEMISTRY-US, V32, P7818, DOI 10.1021/bi00081a029
   DING DXH, 1995, J BIOL CHEM, V270, P24580, DOI 10.1074/jbc.270.41.24580
   ELBEIN AD, 1987, METHOD ENZYMOL, V138, P661
   FEIGE JJ, 1988, J BIOL CHEM, V263, P14023
   FONG LG, 1987, J LIPID RES, V28, P1466
   GOLDBERGER A, 1994, J BIOL CHEM, V269, P17183
   GOLDSTEIN JL, 1979, P NATL ACAD SCI USA, V76, P333, DOI 10.1073/pnas.76.1.333
   Hart Gerald W., 1992, Current Opinion in Cell Biology, V4, P1017, DOI 10.1016/0955-0674(92)90134-X
   HELENIUS A, 1994, MOL BIOL CELL, V5, P253, DOI 10.1091/mbc.5.3.253
   JOHNSTON GI, 1989, J BIOL CHEM, V264, P1816
   Kataoka H, 1999, CIRCULATION, V99, P3110, DOI 10.1161/01.CIR.99.24.3110
   KATOH S, 1995, J EXP MED, V182, P419, DOI 10.1084/jem.182.2.419
   KAUSHAL S, 1994, P NATL ACAD SCI USA, V91, P4024, DOI 10.1073/pnas.91.9.4024
   KUME N, 1991, BIOCHIM BIOPHYS ACTA, V1091, P63, DOI 10.1016/0167-4889(91)90223-K
   Kume N, 1998, CIRC RES, V83, P322, DOI 10.1161/01.RES.83.3.322
   LECONTE I, 1992, J BIOL CHEM, V267, P17415
   LECONTE I, 1994, J BIOL CHEM, V269, P18062
   MOLLER LB, 1993, J BIOL CHEM, V268, P11152
   Moriwaki H, 1998, ARTERIOSCL THROM VAS, V18, P1541, DOI 10.1161/01.ATV.18.10.1541
   Moriwaki H, 1998, FEBS LETT, V440, P29, DOI 10.1016/S0014-5793(98)01414-8
   Murase T, 1998, CIRC RES, V83, P328, DOI 10.1161/01.RES.83.3.328
   Nagayama Y, 1998, J BIOL CHEM, V273, P33423, DOI 10.1074/jbc.273.50.33423
   Oka K, 1998, P NATL ACAD SCI USA, V95, P9535, DOI 10.1073/pnas.95.16.9535
   PAHLSSON P, 1995, EUR J IMMUNOL, V25, P2452, DOI 10.1002/eji.1830250907
   ROHRER L, 1990, NATURE, V343, P570, DOI 10.1038/343570a0
   ROSS R, 1993, NATURE, V362, P801, DOI 10.1038/362801a0
   RUSSO D, 1991, MOL ENDOCRINOL, V5, P29, DOI 10.1210/mend-5-1-29
   Sawamura T, 1997, NATURE, V386, P73, DOI 10.1038/386073a0
   SEMMES OJ, 1992, INT J IMMUNOPHARMACO, V14, P583, DOI 10.1016/0192-0561(92)90119-6
   SMEETS EF, 1993, EUR J IMMUNOL, V23, P147, DOI 10.1002/eji.1830230124
   SPARROW CP, 1989, J BIOL CHEM, V264, P2599
   SZECOWKA J, 1990, ENDOCRINOLOGY, V126, P1834, DOI 10.1210/endo-126-4-1834
   Thornhill WB, 1996, J BIOL CHEM, V271, P19093, DOI 10.1074/jbc.271.32.19093
   TIFFT CJ, 1992, J BIOL CHEM, V267, P3268
   WITZTUM JL, 1991, J CLIN INVEST, V88, P1785, DOI 10.1172/JCI115499
   Wright A, 1998, J IMMUNOL, V160, P3393
   Yoshida H, 1998, BIOCHEM J, V334, P9, DOI 10.1042/bj3340009
NR 41
TC 62
Z9 69
U1 0
U2 2
PU AMER SOC BIOCHEMISTRY MOLECULAR BIOLOGY INC
PI BETHESDA
PA 9650 ROCKVILLE PIKE, BETHESDA, MD 20814 USA
SN 0021-9258
J9 J BIOL CHEM
JI J. Biol. Chem.
PD MAR 3
PY 2000
VL 275
IS 9
BP 6573
EP 6579
DI 10.1074/jbc.275.9.6573
PG 7
WC Biochemistry & Molecular Biology
WE Science Citation Index Expanded (SCI-EXPANDED)
SC Biochemistry & Molecular Biology
GA 290AP
UT WOS:000085654400076
PM 10692464
OA hybrid
DA 2022-04-10
ER

PT J
AU Smith, CK
   Kaplan, MJ
AF Smith, Carolyne K.
   Kaplan, Mariana J.
TI The role of neutrophils in the pathogenesis of systemic lupus
   erythematosus
SO CURRENT OPINION IN RHEUMATOLOGY
LA English
DT Review
DE bone marrow; low-density granulocytes; neutrophil extracellular traps;
   neutrophils; systemic lupus erythematosus
ID PEPTIDYLARGININE DEIMINASE INHIBITION; GELATINASE-ASSOCIATED LIPOCALIN;
   EXTRACELLULAR TRAPS; APOPTOTIC NEUTROPHILS; DNA; DAMAGE; ACTIVATION;
   biomarkersS; NEPHRITIS; RELEASE
AB Purpose of review
   Recent discoveries implicate neutrophils as important regulators of innate and adaptive immunity and in the development of organ damage in systemic autoimmune diseases, including systemic lupus erythematosus (SLE).
   Recent findings
   Various putative SLE biomarkerss are neutrophil-related, including neutrophil granular proteins and histones undergoing post-translational modification during neutrophil extracellular trap (NET) formation. In the bone marrow, lupus neutrophils can drive B and T cell abnormalities, at least in part, by their enhanced production of type-I interferons, tumor necrosis factor-alpha (TNF alpha) and the B-cell stimulating factors B-cell activating factor (BAFF) and a proliferation-inducing ligand (APRIL). Lupus neutrophils and, in particular, lupus low-density granulocytes (a distinct pathogenic subset) display epigenetic modifications and genomic alterations that may be relevant to their deleterious roles in SLE. Proteins and enzymes externalized by lupus NETs can affect vascular health by inducing endothelial apoptosis and oxidizing lipoproteins. Hampering NET formation through peptidylarginine deiminase inhibitor abrogates lupus phenotype and atherosclerosis in murine studies.
   Summary
   Recent discoveries support the notion that neutrophils, low-density granulocytes and aberrant NET formation and clearance play important roles in lupus pathogenesis. Future studies should focus on how to selectively target these immunostimulatory pathway in this disease.
C1 [Smith, Carolyne K.; Kaplan, Mariana J.] NIAMSD, Syst Autoimmun Branch, Intramural Res Program, NIH, Bldg 10,6D47C,10 Ctr Dr,MSC 1560, Bethesda, MD 20892 USA.
RP Kaplan, MJ (corresponding author), NIAMSD, Syst Autoimmun Branch, Intramural Res Program, NIH, Bldg 10,6D47C,10 Ctr Dr,MSC 1560, Bethesda, MD 20892 USA.
EM mariana.kaplan@nih.gov
FU Intramural Research Program at NIAMS/NIH; Lupus Research Institute;
   NATIONAL INSTITUTE OF ARTHRITIS AND MUSCULOSKELETAL AND SKIN
   DISEASESUnited States Department of Health & Human ServicesNational
   Institutes of Health (NIH) - USANIH National Institute of Arthritis &
   Musculoskeletal & Skin Diseases (NIAMS) [ZIAAR041199] Funding Source:
   NIH RePORTER
FX This study was supported by the Intramural Research Program at NIAMS/NIH
   and the Lupus Research Institute.
CR Alves CMOS, 2008, CLIN RHEUMATOL, V27, P701, DOI 10.1007/s10067-007-0768-x
   Bardoel BW, 2014, CELL HOST MICROBE, V15, P526, DOI 10.1016/j.chom.2014.04.011
   Bouts YM, 2012, AUTOIMMUNITY, V45, P597, DOI 10.3109/08916934.2012.719953
   BRANDT L, 1969, SCAND J HAEMATOL, V6, P348
   Brinkmann V, 2004, SCIENCE, V303, P1532, DOI 10.1126/science.1092385
   Brunner HI, 2014, LUPUS SCI MED, V1, DOI 10.1136/lupus-2014-000038
   Brunner HI, 2012, ARTHRITIS RHEUM-US, V64, P2687, DOI 10.1002/art.34426
   Cairns AP, 2001, ANN RHEUM DIS, V60, P950, DOI 10.1136/ard.60.10.950
   Carmona-Rivera C, 2014, ANN RHEUM DIS
   Cheng FJ, 2014, INT J RHEUM DIS
   Coit P, 2015, J AUTOIMMUN, V58, P59, DOI 10.1016/j.jaut.2015.01.004
   Colonna L, 2014, CURR OPIN RHEUMATOL, V26, P459, DOI 10.1097/BOR.0000000000000083
   Coquery CM, 2014, PLOS ONE, V9, DOI 10.1371/journal.pone.0102284
   Courtney PA, 1999, ANN RHEUM DIS, V58, P309, DOI 10.1136/ard.58.5.309
   Denny MR, 2010, J IMMUNOL, V184, P3284, DOI 10.4049/jimmunol.0902199
   Donnelly S, 2006, ARTHRITIS RHEUM-US, V54, P1543, DOI 10.1002/art.21783
   Dwivedi N, 2014, FASEB J, V28, P2840, DOI 10.1096/fj.13-247254
   Dwivedi N, 2014, ANN RHEUM DIS, V73, P483, DOI 10.1136/annrheumdis-2013-203844
   Elewa EA, 2015, LUPUS, V24, P138, DOI 10.1177/0961203314550225
   Fuchs TA, 2007, J CELL BIOL, V176, P231, DOI 10.1083/jcb.200606027
   Garcia-Romo GS, 2011, SCI TRANSL MED, V3, DOI 10.1126/scitranslmed.3001201
   Gehrke N, 2013, IMMUNITY, V39, P482, DOI 10.1016/j.immuni.2013.08.004
   Gupta AK, 2014, PLOS ONE, V9, DOI 10.1371/journal.pone.0097088
   HACBARTH E, 1986, ARTHRITIS RHEUM-US, V29, P1334, DOI 10.1002/art.1780291105
   Hakkim A, 2010, P NATL ACAD SCI USA, V107, P9813, DOI 10.1073/pnas.0909927107
   Han JH, 2014, EUR J IMMUNOL, V44, P215, DOI 10.1002/eji.201343714
   Kahlenberg JM, 2013, J IMMUNOL, V190, P1217, DOI 10.4049/jimmunol.1202388
   Kaplan MJ, 2011, NAT REV RHEUMATOL, V7, P691, DOI 10.1038/nrrheum.2011.132
   Khandpur R, 2013, SCI TRANSL MED, V5, DOI 10.1126/scitranslmed.3005580
   Knight J.S., 2014, ANN RHEUM DIS
   Knight JS, 2014, CIRC RES, V114, P947, DOI 10.1161/CIRCRESAHA.114.303312
   Knight JS, 2013, J CLIN INVEST, V123, P2981, DOI 10.1172/JCI67390
   Kolaczkowska E, 2013, NAT REV IMMUNOL, V13, P159, DOI 10.1038/nri3399
   Lande R, 2011, SCI TRANSL MED, V3, DOI 10.1126/scitranslmed.3001180
   Lee SJ, 2011, NAT REV NEPHROL, V7, P718, DOI 10.1038/nrneph.2011.150
   Leffler J, 2012, J IMMUNOL, V188, P3522, DOI 10.4049/jimmunol.1102404
   Li PX, 2010, J EXP MED, V207, P1853, DOI 10.1084/jem.20100239
   Li YN, 2014, LUPUS, V23, P868, DOI 10.1177/0961203314530484
   Lindau D, 2014, ANN RHEUM DIS, V73, P2199, DOI 10.1136/annrheumdis-2012-203041
   Lorenz G, 2014, CURR OPIN NEPHROL HY, V23, P211, DOI 10.1097/01.mnh.0000444816.57378.21
   Mak A, 2014, BIOMED RES INT, V2014, DOI 10.1155/2014/178721
   Mantovani A, 2011, NAT REV IMMUNOL, V11, P519, DOI 10.1038/nri3024
   Manz MG, 2014, NAT REV IMMUNOL, V14, P302, DOI 10.1038/nri3660
   McMahon M, 2014, ARTHRITIS RHEUMATOL, V66, P130, DOI 10.1002/art.38204
   Metzler KD, 2014, CELL REP, V8, P883, DOI 10.1016/j.celrep.2014.06.044
   Nakkuntod J, 2011, CLIN CHIM ACTA, V412, P1457, DOI 10.1016/j.cca.2011.04.002
   Neeli I, 2008, J IMMUNOL, V180, P1895, DOI 10.4049/jimmunol.180.3.1895
   Palanichamy A, 2014, J IMMUNOL, V192, P906, DOI 10.4049/jimmunol.1302112
   Palmer LJ, 2012, CLIN EXP IMMUNOL, V167, P261, DOI 10.1111/j.1365-2249.2011.04518.x
   Pieterse E, 2015, CLIN EXP IMMUNOL, V179, P68, DOI 10.1111/cei.12359
   Pieterse E, 2014, FRONT IMMUNOL, V5, DOI 10.3389/fimmu.2014.00164
   Pillay J, 2010, BLOOD, V116, P625, DOI 10.1182/blood-2010-01-259028
   Sang A, 2014, MOL IMMUNOL, V62, P329, DOI 10.1016/j.molimm.2013.11.013
   Singh N, 2014, ARTHRITIS RES THER, V16, DOI 10.1186/ar4681
   Smith CK, 2014, ARTHRITIS RHEUMATOL, V66, P2532, DOI 10.1002/art.38703
   Sukapan P, 2014, J HUM GENET, V59, P178, DOI 10.1038/jhg.2013.140
   Summers C, 2010, TRENDS IMMUNOL, V31, P318, DOI 10.1016/j.it.2010.05.006
   Torres-Salido MT, 2014, NEPHROL DIAL TRANSPL, V29, P1740, DOI 10.1093/ndt/gfu062
   Tessarz P, 2014, NAT REV MOL CELL BIO, V15, P703, DOI 10.1038/nrm3890
   Umiker BR, 2014, EUR J IMMUNOL, V44, P1503, DOI 10.1002/eji.201344283
   van Bavel CC, 2009, MOL IMMUNOL, V47, P511, DOI 10.1016/j.molimm.2009.08.009
   Villanueva E, 2011, J IMMUNOL, V187, P538, DOI 10.4049/jimmunol.1100450
   Wang W, 2014, LIFE SCI, V117, P19, DOI 10.1016/j.lfs.2014.09.012
   Wang YM, 2009, J CELL BIOL, V184, P205, DOI 10.1083/jcb.200806072
   Watson L, 2014, PEDIATR NEPHROL, V29, P397, DOI 10.1007/s00467-013-2668-4
   Yipp BG, 2013, BLOOD, V122, P2784, DOI 10.1182/blood-2013-04-457671
   Yipp BG, 2012, NAT MED, V18, P1386, DOI 10.1038/nm.2847
   Yousefi S, 2009, CELL DEATH DIFFER, V16, P1438, DOI 10.1038/cdd.2009.96
   Zhang SG, 2014, INTERNAL MED, V53, P2763, DOI 10.2169/internalmedicine.53.2570
   Zhuang HY, 2014, ARTHRITIS RHEUMATOL, V66, P140, DOI 10.1002/art.38189
NR 70
TC 80
Z9 85
U1 0
U2 14
PU LIPPINCOTT WILLIAMS & WILKINS
PI PHILADELPHIA
PA TWO COMMERCE SQ, 2001 MARKET ST, PHILADELPHIA, PA 19103 USA
SN 1040-8711
EI 1531-6963
J9 CURR OPIN RHEUMATOL
JI Curr. Opin. Rheumatol.
PD SEP
PY 2015
VL 27
IS 5
BP 448
EP 453
DI 10.1097/BOR.0000000000000197
PG 6
WC Rheumatology
WE Science Citation Index Expanded (SCI-EXPANDED)
SC Rheumatology
GA DD0PS
UT WOS:000369622500004
PM 26125102
OA Green Published
DA 2022-04-10
ER

PT J
AU Dai, L
   Liu, YS
   He, JT
   Flack, CG
   Talsma, CE
   Crowley, JG
   Muraszko, KM
   Fan, X
   Lubman, DM
AF Dai, Lan
   Liu, Yashu
   He, Jintang
   Flack, Callie G.
   Talsma, Caroline E.
   Crowley, Jessica G.
   Muraszko, Karin M.
   Fan, Xing
   Lubman, David M.
TI Differential profiling studies of N-linked glycoproteins in glioblastoma
   cancer stem cells upon treatment with gamma-secretase inhibitor
SO PROTEOMICS
LA English
DT Article
DE Cancer stem cells; Gliobastoma; Glycoproteomics; Label-free; Lectin
   microarray; Multi-lectin chromatography
ID LECTIN AFFINITY-CHROMATOGRAPHY; HUMAN OVARIAN-CANCER; CATHEPSIN-D;
   IN-VIVO; mass spectrometry; GLUCOSIDASE-II; NOTCH; MEDULLOBLASTOMA;
   IDENTIFICATION; GLYCOSYLATION
AB We have recently demonstrated that Notch pathway blockade by gamma-secretase inhibitor (GSI) depletes cancer stem cells (CSCs) in Glioblastoma Multiforme (GBM) through reduced proliferation and induced apoptosis. However, the detailed mechanism by which the manipulation of Notch signal induces alterations on post-translational modification such as glycosylation has not been investigated. Herein, we present a differential profiling work to detect the change of glycosylation pattern upon drug treatment in GBM CSCs. Rapid screening of differential cell surface glycan structures has been performed by lectin microarray on live cells followed by the detection of N-linked glycoproteins from cell lysates using multi-lectin chromatography and label-free quantitative mass spectrometry analysis. A total of 51 and 52 glycoproteins were identified in the CSC- and GSI-treated groups, respectively, filtered by a combination of decoy database searching and Trans-Proteomic Pipeline (TPP) processing. Although no significant changes were detected from the lectin microarray experiment, 7 differentially expressed glycoproteins with high confidence were captured after the multi-lectin column including key enzymes involved in glycan processing. Functional annotations of the altered glycoproteins suggest a phenotype transformation of CSCs toward a less tumorigenic form upon GSI treatment.
C1 [Liu, Yashu; He, Jintang; Lubman, David M.] Univ Michigan, Med Ctr, Dept Surg, Ann Arbor, MI 48109 USA.
   [Dai, Lan] Univ Michigan, Med Ctr, Program Bioinformat, Ann Arbor, MI 48109 USA.
   [Flack, Callie G.; Talsma, Caroline E.; Crowley, Jessica G.; Muraszko, Karin M.; Fan, Xing] Univ Michigan, Med Ctr, Dept Neurosurg, Ann Arbor, MI 48109 USA.
RP Dai, L (corresponding author), Univ Michigan, Med Ctr, Dept Surg, 1150 W Med Ctr Dr,MSRB 1,A510B, Ann Arbor, MI 48109 USA.
EM dmlubman@umich.edu; xingf@umich.edu
RI He, Jintang/G-8671-2013
FU National Institute of HealthUnited States Department of Health & Human
   ServicesNational Institutes of Health (NIH) - USA [R01 49500, R21
   CA134623]; Accelerate Brain Cancer Cure Project Award; American Brain
   Tumor Association; Voices Against Brain Cancer Research Grant; NATIONAL
   CANCER INSTITUTEUnited States Department of Health & Human
   ServicesNational Institutes of Health (NIH) - USANIH National Cancer
   Institute (NCI) [R21CA134623] Funding Source: NIH RePORTER; NATIONAL
   INSTITUTE OF GENERAL MEDICAL SCIENCESUnited States Department of Health
   & Human ServicesNational Institutes of Health (NIH) - USANIH National
   Institute of General Medical Sciences (NIGMS) [R01GM049500] Funding
   Source: NIH RePORTER
FX This work was funded under the National Institute of Health Grants R01
   49500 (D.M.L.) and R21 CA134623 (D.M.L.). The authors acknowledge grant
   support to Dr. Fan from Accelerate Brain Cancer Cure Project Award,
   American Brain Tumor Association Translational Grant, and Voices Against
   Brain Cancer Research Grant.
CR Abeysinghe HR, 2004, CANCER GENET CYTOGEN, V149, P1, DOI 10.1016/S0165-4608(03)00234-6
   Abeysinghe HR, 2003, CANCER GENET CYTOGEN, V143, P125, DOI 10.1016/S0165-4608(02)00855-5
   Berchem G, 2002, ONCOGENE, V21, P5951, DOI 10.1038/sj.onc.1205745
   Chen R, 2009, J PROTEOME RES, V8, P651, DOI 10.1021/pr8008012
   Dai L, 2010, J PROTEOME RES, V9, P3394, DOI 10.1021/pr100231m
   Dai L, 2009, ELECTROPHORESIS, V30, P1119, DOI 10.1002/elps.200800505
   Fan X, 2008, J CLIN ONCOL, V26, P2821, DOI 10.1200/JCO.2007.15.2264
   Fan X, 2006, CANCER RES, V66, P7445, DOI 10.1158/0008-5472.CAN-06-0858
   Fan X, 2010, STEM CELLS, V28, P5, DOI 10.1002/stem.254
   Galli R, 2004, CANCER RES, V64, P7011, DOI 10.1158/0008-5472.CAN-04-1364
   Gilbert CA, 2009, J CELL BIOCHEM, V108, P1031, DOI 10.1002/jcb.22350
   Gustafsson MV, 2005, DEV CELL, V9, P617, DOI 10.1016/j.devcel.2005.09.010
   He JT, 2011, J PROTEOME RES, V10, P330, DOI 10.1021/pr101158p
   He JT, 2010, J PROTEOME RES, V9, P2565, DOI 10.1021/pr100012p
   HEYWORTH CM, 1982, BIOCHEM J, V201, P615, DOI 10.1042/bj2010615
   Jafar-Nejad H, 2010, GLYCOBIOLOGY, V20, P931, DOI 10.1093/glycob/cwq053
   Jensen LJ, 2009, NUCLEIC ACIDS RES, V37, pD412, DOI 10.1093/nar/gkn760
   Jin J, 2004, CURR BIOL, V14, P1436, DOI 10.1016/j.cub.2004.07.051
   Journet A, 1999, J CELL SCI, V112, P3833
   Kaji H, 2003, NAT BIOTECHNOL, V21, P667, DOI 10.1038/nbt829
   Kukkola L, 2003, J BIOL CHEM, V278, P47685, DOI 10.1074/jbc.M306806200
   Lee HJ, 2010, J PROTEOME RES, V9, P308, DOI 10.1021/pr900649b
   Liaudet-Coopman E, 2006, CANCER LETT, V237, P167, DOI 10.1016/j.canlet.2005.06.007
   Lim J, 2006, CELL, V125, P801, DOI 10.1016/j.cell.2006.03.032
   Lung HL, 2005, ONCOGENE, V24, P6525, DOI 10.1038/sj.onc.1208812
   MARTINIUK F, 1985, J BIOL CHEM, V260, P1238
   McDonald CA, 2009, MOL CELL PROTEOMICS, V8, P287, DOI 10.1074/mcp.M800272-MCP200
   Mendez O, 2010, MOL CANCER, V9, DOI 10.1186/1476-4598-9-133
   Orazine CL, 2008, J PROTEOME RES, V7, P1542, DOI 10.1021/pr7008516
   Pelletier MF, 2000, GLYCOBIOLOGY, V10, P815, DOI 10.1093/glycob/10.8.815
   Pilobello KT, 2007, P NATL ACAD SCI USA, V104, P11534, DOI 10.1073/pnas.0704954104
   Read TA, 2009, CANCER CELL, V15, P135, DOI 10.1016/j.ccr.2008.12.016
   Santamaria R, 2007, J LIPID RES, V48, P2275, DOI 10.1194/jlr.M700308-JLR200
   Son MJ, 2009, CELL STEM CELL, V4, P440, DOI 10.1016/j.stem.2009.03.003
   SRIVASTAVA PN, 1982, BIOCHEM BIOPH RES CO, V109, P63, DOI 10.1016/0006-291X(82)91566-2
   Stanley P, 2007, CURR OPIN STRUC BIOL, V17, P530, DOI 10.1016/j.sbi.2007.09.007
   Stockhausen MT, 2010, NEURO-ONCOLOGY, V12, P199, DOI 10.1093/neuonc/nop022
   Takeuchi H, 2010, SEMIN CELL DEV BIOL, V21, P638, DOI 10.1016/j.semcdb.2010.03.003
   TAMAKI K, 1986, J INVEST DERMATOL, V86, P222, DOI 10.1111/1523-1747.ep12285165
   Tao SC, 2008, GLYCOBIOLOGY, V18, P761, DOI 10.1093/glycob/cwn063
   Tomita T, 2002, FEBS LETT, V520, P117, DOI 10.1016/S0014-5793(02)02802-8
   Vescovi AL, 2006, NAT REV CANCER, V6, P425, DOI 10.1038/nrc1889
   Ward RJ, 2009, CANCER RES, V69, P4682, DOI 10.1158/0008-5472.CAN-09-0342
   XIONG L, 2003, J PROTEOME RES, V8, P651
   Yang ZP, 2005, J CHROMATOGR A, V1070, P57, DOI 10.1016/j.chroma.2005.02.034
   Yang ZP, 2004, J CHROMATOGR A, V1053, P79, DOI 10.1016/j.chroma.2004.08.150
   ZEGER SL, 1991, J AM STAT ASSOC, V86, P79, DOI 10.2307/2289717
   Zhang H, 2003, NAT BIOTECHNOL, V21, P660, DOI 10.1038/nbt827
NR 48
TC 22
Z9 23
U1 0
U2 20
PU WILEY
PI HOBOKEN
PA 111 RIVER ST, HOBOKEN 07030-5774, NJ USA
SN 1615-9853
EI 1615-9861
J9 PROTEOMICS
JI Proteomics
PD OCT
PY 2011
VL 11
IS 20
SI SI
BP 4021
EP 4028
DI 10.1002/pmic.201100014
PG 8
WC Biochemical Research Methods; Biochemistry & Molecular Biology
WE Science Citation Index Expanded (SCI-EXPANDED)
SC Biochemistry & Molecular Biology
GA 841DD
UT WOS:000296491800008
PM 21898824
OA Green Accepted, Green Submitted
DA 2022-04-10
ER

PT J
AU Derks, KWJ
   Hoeijmakers, JHJ
   Pothof, J
AF Derks, Kasper W. J.
   Hoeijmakers, Jan H. J.
   Pothof, Joris
TI The DNA damage response: The omics era and its impact
SO DNA REPAIR
LA English
DT Article
DE DNA damage response; Genomics; Transcriptomics; Next generation
   sequencing; Proteomics
ID UV-SENSITIVE SYNDROME; LONG NONCODING RNAS; GENOMIC REARRANGEMENTS;
   PROFILING REVEALS; GENE FUSIONS; CANCER; CELL; TRANSCRIPTION; MUTATIONS;
   MICRORNAS
AB The emergence of high density technologies monitoring the genome, transcriptome and proteome in relation to genotoxic stress have tremendously enhanced our knowledge on global responses and dynamics in the DNA damage response, including its relation with cancer and aging. Moreover, '-omics' technologies identified many novel factors, their post-translational modification, pathway and global responses in the cellular response to DNA damage. Based on omics, it is currently estimated that thousands of gene(product)s participate in the DNA damage response, recognizing complex networks that determine cell fate after damage to the most precious cellular molecule, DNA. The development of next generation sequencing technology and associated specialized protocols can quantitatively monitor RNA and DNA at unprecedented single nucleotide resolution. In this review we will discuss the contribution of omics technologies and in particular next generation sequencing to our understanding of the DNA damage response and the future prospective of next generation sequencing, its single cell application and omics dataset integration in unraveling intricate DNA damage signaling networks. (C) 2014 Elsevier B.V. All rights reserved.
C1 [Derks, Kasper W. J.; Hoeijmakers, Jan H. J.; Pothof, Joris] Erasmus Univ, Med Ctr, Netherlands Toxicogen Ctr, Dept Genet, NL-3015 GE Rotterdam, Netherlands.
RP Pothof, J (corresponding author), Erasmus Univ, Med Ctr, Netherlands Toxicogen Ctr, Dept Genet, Dr Molewaterpl 50, NL-3015 GE Rotterdam, Netherlands.
EM j.pothof@erasmusmc.nl
RI Hoeijmakers, Jan/AAX-6972-2021
FU European CommissionEuropean CommissionEuropean Commission Joint Research
   Centre [FP7-Health-2008-200880, HEALTH-F2-2010-259893]; National
   Institute of Health/National Institute of Ageing [1PO1 AG-17242-02];
   NIEHSUnited States Department of Health & Human ServicesNational
   Institutes of Health (NIH) - USANIH National Institute of Environmental
   Health Sciences (NIEHS) [1UO1 ES011044]; Royal Academy of Arts and
   Sciences of The Netherlands [ISK/2483/PAH]; European Research
   CouncilEuropean Research Council (ERC)European Commission [233424];
   Dutch Cancer SocietyKWF Kankerbestrijding [20115030]; Netherlands
   Toxicogenomics Center [050-040-203]; NATIONAL INSTITUTE OF ENVIRONMENTAL
   HEALTH SCIENCESUnited States Department of Health & Human
   ServicesNational Institutes of Health (NIH) - USANIH National Institute
   of Environmental Health Sciences (NIEHS) [U01ES011044] Funding Source:
   NIH RePORTER; NATIONAL INSTITUTE ON AGINGUnited States Department of
   Health & Human ServicesNational Institutes of Health (NIH) - USANIH
   National Institute on Aging (NIA) [P01AG017242] Funding Source: NIH
   RePORTER
FX We acknowledge financial support from the European Commission
   FP7-Health-2008-200880, HEALTH-F2-2010-259893 and National Institute of
   Health/National Institute of Ageing (1PO1 AG-17242-02), NIEHS (1UO1
   ES011044), and the Royal Academy of Arts and Sciences of The Netherlands
   (ISK/2483/PAH) (academia professorship to JHJH), European Research
   Council (233424) Advanced Grant to JHJH, a KWO grant from the Dutch
   Cancer Society (20115030) and The Netherlands Toxicogenomics Center
   (050-040-203).
CR AKDEMIR KC, 2013, NUCL ACIDS RES
   Ameres SL, 2013, NAT REV MOL CELL BIO, V14, P475, DOI 10.1038/nrm3611
   Bartek J, 2007, ONCOGENE, V26, P7773, DOI 10.1038/sj.onc.1210881
   Beli P, 2012, MOL CELL, V46, P212, DOI 10.1016/j.molcel.2012.01.026
   Bennetzen MV, 2010, MOL CELL PROTEOMICS, V9, P1314, DOI 10.1074/mcp.M900616-MCP200
   Bensimon A, 2010, SCI SIGNAL, V3, DOI 10.1126/scisignal.2001034
   Berger MF, 2010, GENOME RES, V20, P413, DOI 10.1101/gr.103697.109
   Bouwman P, 2012, NAT REV CANCER, V12, P587, DOI 10.1038/nrc3342
   Broz DK, 2013, GENE DEV, V27, P1016, DOI 10.1101/gad.212282.112
   Carninci P, 2009, NAT METHODS, V6, P711, DOI 10.1038/nmeth1009-711
   Churchman LS, 2011, NATURE, V469, P368, DOI 10.1038/nature09652
   Core LJ, 2008, SCIENCE, V322, P1845, DOI 10.1126/science.1162228
   Crosetto N, 2013, NAT METHODS, V10, P361, DOI 10.1038/nmeth.2408
   Curtin NJ, 2012, NAT REV CANCER, V12, P801, DOI 10.1038/nrc3399
   Daub H, 2012, MOL CELL, V46, P113, DOI 10.1016/j.molcel.2012.04.011
   de Wit E, 2012, GENE DEV, V26, P11, DOI 10.1101/gad.179804.111
   Di Francesco A, 2013, INT J MOL SCI, V14, P17881, DOI 10.3390/ijms140917881
   Djebali S, 2012, NATURE, V489, P101, DOI 10.1038/nature11233
   Dolezalova D, 2012, STEM CELLS, V30, P1362, DOI 10.1002/stem.1108
   Dolle MET, 2011, PATHOBIOL AGING AGE, V1, DOI 10.3402/pba.v1i0.7219
   Esteller M, 2011, NAT REV GENET, V12, P861, DOI 10.1038/nrg3074
   Falconer E, 2012, NAT METHODS, V9, P1107, DOI [10.1038/NMETH.2206, 10.1038/nmeth.2206]
   Francia S, 2012, NATURE, V488, P231, DOI 10.1038/nature11179
   Galanty Y, 2009, NATURE, V462, P935, DOI 10.1038/nature08657
   Garinis GA, 2005, EMBO J, V24, P3952, DOI 10.1038/sj.emboj.7600849
   Garinis GA, 2009, NAT CELL BIOL, V11, P604, DOI 10.1038/ncb1866
   Girardi C, 2012, PLOS ONE, V7, DOI 10.1371/journal.pone.0031293
   Guenole A, 2013, MOL CELL, V49, P346, DOI 10.1016/j.molcel.2012.11.023
   Gundry M, 2012, NUCLEIC ACIDS RES, V40, P2032, DOI 10.1093/nar/gkr949
   Guo HL, 2010, NATURE, V466, P835, DOI 10.1038/nature09267
   Guttman M, 2012, NATURE, V482, P339, DOI 10.1038/nature10887
   Hakim O, 2012, NATURE, V484, P69, DOI 10.1038/nature10909
   Harper JW, 2007, MOL CELL, V28, P739, DOI 10.1016/j.molcel.2007.11.015
   Hart M, 2014, MOL CANCER RES, V12, P250, DOI 10.1158/1541-7786.MCR-13-0230
   Hoeijmakers JHJ, 2009, NEW ENGL J MED, V361, P1475, DOI 10.1056/NEJMra0804615
   Huarte M, 2010, CELL, V142, P409, DOI 10.1016/j.cell.2010.06.040
   Iacovoni JS, 2010, EMBO J, V29, P1446, DOI 10.1038/emboj.2010.38
   Jackson SP, 2009, NATURE, V461, P1071, DOI 10.1038/nature08467
   Jensen TH, 2013, MOL CELL, V52, P473, DOI 10.1016/j.molcel.2013.10.032
   Kanematsu S, 2014, GENE, V533, P520, DOI 10.1016/j.gene.2013.08.005
   Kruse JJCM, 2007, MUTAT RES-FUND MOL M, V617, P58, DOI 10.1016/j.mrfmmm.2006.12.004
   Kruse JP, 2009, CELL, V137, P609, DOI 10.1016/j.cell.2009.04.050
   Li AQ, 2012, PLOS ONE, V7, DOI 10.1371/journal.pone.0048066
   Li G, 2013, PLOS ONE, V8, DOI 10.1371/journal.pone.0084486
   Liu Q, 2013, MOL BIOSYST, V9, P3036, DOI 10.1039/c3mb70114j
   Liu Q, 2013, NUCLEIC ACIDS RES, V41, P4976, DOI 10.1093/nar/gkt182
   Lu J, 2005, NATURE, V435, P834, DOI 10.1038/nature03702
   Maher CA, 2009, P NATL ACAD SCI USA, V106, P12353, DOI 10.1073/pnas.0904720106
   Maher CA, 2009, NATURE, V458, P97, DOI 10.1038/nature07638
   Marin-Bejar O, 2013, GENOME BIOL, V14, DOI 10.1186/gb-2013-14-9-r104
   Massip L, 2010, CELL CYCLE, V9, P2963, DOI 10.4161/cc.9.15.12412
   Matsuoka S, 1998, SCIENCE, V282, P1893, DOI 10.1126/science.282.5395.1893
   Mattick JS, 2011, SEMIN CELL DEV BIOL, V22, P327, DOI 10.1016/j.semcdb.2011.05.002
   Mattick JS, 2009, PLOS GENET, V5, DOI 10.1371/journal.pgen.1000459
   Melo CA, 2013, MOL CELL, V49, P524, DOI 10.1016/j.molcel.2012.11.021
   Mitelman F, 2007, NAT REV CANCER, V7, P233, DOI 10.1038/nrc2091
   Morris JR, 2010, BIOCHEM SOC T, V38, P92, DOI 10.1042/BST0380092
   Nakazawa Y, 2012, NAT GENET, V44, P586, DOI 10.1038/ng.2229
   Neijenhuis S, 2013, DNA REPAIR, V12, P394, DOI 10.1016/j.dnarep.2013.02.003
   Neilsen CT, 2012, TRENDS GENET, V28, P544, DOI 10.1016/j.tig.2012.07.005
   Ng SB, 2009, NATURE, V461, P272, DOI 10.1038/nature08250
   Niedernhofer LJ, 2006, NATURE, V444, P1038, DOI 10.1038/nature05456
   Park PJ, 2009, NAT REV GENET, V10, P669, DOI 10.1038/nrg2641
   Paulsen MT, 2013, P NATL ACAD SCI USA, V110, P2240, DOI 10.1073/pnas.1219192110
   Pelechano V, 2013, NATURE, V497, P127, DOI 10.1038/nature12121
   Pines A, 2012, J CELL BIOL, V199, P235, DOI 10.1083/jcb.201112132
   Pines A, 2011, MOL CELL BIOL, V31, P4964, DOI 10.1128/MCB.05258-11
   POTHOF J, CELL CYCLE, V8
   Pothof J, 2009, EMBO J, V28, P2090, DOI 10.1038/emboj.2009.156
   Povlsen LK, 2012, NAT CELL BIOL, V14, P1089, DOI 10.1038/ncb2579
   Schumacher B, 2008, PLOS GENET, V4, DOI 10.1371/journal.pgen.1000161
   Schwertman P, 2012, NAT GENET, V44, P598, DOI 10.1038/ng.2230
   Shapiro E, 2013, NAT REV GENET, V14, P618, DOI 10.1038/nrg3542
   Stockholm D, 2007, PLOS ONE, V2, DOI 10.1371/journal.pone.0000394
   Stolk L, 2012, NAT GENET, V44, P260, DOI 10.1038/ng.1051
   Ulitsky I, 2013, CELL, V154, P26, DOI 10.1016/j.cell.2013.06.020
   van Jaarsveld MTM, 2013, ONCOGENE, V32, P4284, DOI 10.1038/onc.2012.433
   VANJAARSVELD MT, 2013, MOL ONCOL
   Walther TC, 2010, J CELL BIOL, V190, P491, DOI 10.1083/jcb.201004052
   Wilusz JE, 2009, GENE DEV, V23, P1494, DOI 10.1101/gad.1800909
   Wouters MD, 2011, MUTAT RES-FUND MOL M, V717, P54, DOI 10.1016/j.mrfmmm.2011.03.012
   Zhang A, 2013, CELL RES, V23, P340, DOI 10.1038/cr.2012.164
   Zhang XN, 2011, MOL CELL, V41, P371, DOI 10.1016/j.molcel.2011.01.020
   Zhao J, 2010, MOL CELL, V40, P939, DOI 10.1016/j.molcel.2010.12.011
   Zhao Q, 2009, P NATL ACAD SCI USA, V106, P1886, DOI 10.1073/pnas.0812945106
   Zhou WB, 2012, NAT GENET, V44, P910, DOI 10.1038/ng.2347
   Zhou ZX, 2013, GENOME RES, V23, P705, DOI 10.1101/gr.146357.112
NR 87
TC 20
Z9 21
U1 1
U2 24
PU ELSEVIER
PI AMSTERDAM
PA RADARWEG 29, 1043 NX AMSTERDAM, NETHERLANDS
SN 1568-7864
EI 1568-7856
J9 DNA REPAIR
JI DNA Repair
PD JUL
PY 2014
VL 19
SI SI
BP 214
EP 220
DI 10.1016/j.dnarep.2014.03.008
PG 7
WC Genetics & Heredity; Toxicology
WE Science Citation Index Expanded (SCI-EXPANDED)
SC Genetics & Heredity; Toxicology
GA AK4QC
UT WOS:000338408200024
PM 24794401
OA Green Accepted
DA 2022-04-10
ER

PT J
AU Bakhtiar, R
AF Bakhtiar, Ray
TI Therapeutic Recombinant Monoclonal Antibodies
SO JOURNAL OF CHEMICAL EDUCATION
LA English
DT Article
DE Graduate Education/Research; Upper-Division Undergraduate; Biochemistry;
   Textbooks/Reference Books; Biotechnology; Drugs/Pharmaceuticals;
   Proteins/peptide
ID CANCER-THERAPY; DISCOVERY; WATCH
AB During the last two decades, the rapid growth of biotechnology-derived techniques has led to a myriad of therapeutic recombinant monoclonal antibodies with significant clinical benefits. Recombinant monoclonal antibodies can be obtained from a number of natural sources such as animal cell cultures using recombinant DNA engineering. In contrast to most low molecular weight drugs, which are chemically synthesized and their structures are well understood, recombinant monoclonal antibodies are large (e.g., 150 kDa) complex mixtures possessing post-translational modification. Therapeutic recombinant monoclonal antibodies represent the state-of-the-art of biomedical research and provide effective strategies to treat a number of diseases for which there are no available treatments. The hallmark of a therapeutic monoclonal antibody is to bind to its target antigen (e.g., a cancer cell) with high affinity and specificity and render its destruction. A brief overview of recombinant therapeutic monoclonal antibodies including their structures, productions, and clinical applications is presented. This article is a general tutorial for upper-level pharmacy and premed undergraduate students and graduate students with an introductory biochemistry background.
C1 Merck Res Labs, West Point, PA 19486 USA.
RP Bakhtiar, R (corresponding author), Merck Res Labs, West Point, PA 19486 USA.
EM rbakhtiar@msn.com
CR Alkan SS, 2004, NAT REV IMMUNOL, V4, P153, DOI 10.1038/nri1265
   Carter PJ, 2011, EXP CELL RES, V317, P1261, DOI 10.1016/j.yexcr.2011.02.013
   Carter PJ, 2006, NAT REV IMMUNOL, V6, P343, DOI 10.1038/nri1837
   Chames P, 2009, MABS-AUSTIN, V1, P539, DOI 10.4161/mabs.1.6.10015
   Chari RVJ, 2008, ACCOUNTS CHEM RES, V41, P98, DOI 10.1021/ar700108g
   Chung AS, 2011, ANNU REV CELL DEV BI, V27, P563, DOI 10.1146/annurev-cellbio-092910-154002
   Chung AS, 2010, NAT REV CANCER, V10, P505, DOI 10.1038/nrc2868
   Drahl C., 2012, CHEM ENG NEWS, V90, P36
   Ducry L, 2010, BIOCONJUGATE CHEM, V21, P5, DOI 10.1021/bc9002019
   Ferrara N, 2004, NAT REV DRUG DISCOV, V3, P391, DOI 10.1038/nrd1381
   Jarvis LM, 2012, CHEM ENG NEWS, V90, P12
   Jefferis R, 2007, EXPERT OPIN BIOL TH, V7, P1401, DOI 10.1517/14712598.7.9.1401
   Jefferis R, 2009, NAT REV DRUG DISCOV, V8, P226, DOI 10.1038/nrd2804
   Kelley B, 2009, MABS-AUSTIN, V1, P443, DOI 10.4161/mabs.1.5.9448
   Kivitz A, 2007, EXPERT REV MED DEVIC, V4, P109, DOI 10.1586/17434440.4.2.109
   KOHLER G, 1975, NATURE, V256, P495, DOI 10.1038/256495a0
   Liu HC, 2008, J PHARM SCI-US, V97, P2426, DOI 10.1002/jps.21180
   Mascelli MA, 2007, J CLIN PHARMACOL, V47, P553, DOI 10.1177/0091270006298360
   Nelson AL, 2010, NAT REV DRUG DISCOV, V9, P767, DOI 10.1038/nrd3229
   Nelson AL, 2010, MABS-AUSTIN, V2, P77, DOI 10.4161/mabs.2.1.10786
   Nicolaou KC, 2009, BIOORGAN MED CHEM, V17, P2290, DOI 10.1016/j.bmc.2008.10.089
   Nissim A., 2008, V181, P3
   Olsen NJ, 2004, NEW ENGL J MED, V350, P2167, DOI 10.1056/NEJMra032906
   Reichert JM, 2012, MABS-AUSTIN, V4, P1, DOI 10.4161/mabs.4.1.18719
   Reichert Janice M, 2011, MAbs, V3, P223
   Reichert JM, 2010, MABS-AUSTIN, V2, P84, DOI 10.4161/mabs.2.1.10677
   RIECHMANN L, 1988, NATURE, V332, P323, DOI 10.1038/332323a0
   Rodrigues ME, 2010, BIOTECHNOL PROGR, V26, P332, DOI 10.1002/btpr.348
   Schroeder HW, 2010, J ALLERGY CLIN IMMUN, V125, pS41, DOI 10.1016/j.jaci.2009.09.046
   Spath PJ, 1999, SEPSIS, V3, P197, DOI [10.1023/A:1009899803032, DOI 10.1023/A:1009899803032]
   Steinitz Michael, 2009, Human Antibodies, V18, P1, DOI 10.3233/HAB-2009-0196
   van Vollenhoven RF, 2011, NAT REV RHEUMATOL, V7, P205, DOI 10.1038/nrrheum.2011.22
   Weiner LM, 2006, J IMMUNOTHER, V29, P1, DOI 10.1097/01.cji.0000192105.24583.83
   World Health Organization, 2009, WHO DRUG INFORM, V23, P195
   Wu AM, 2005, NAT BIOTECHNOL, V23, P1137, DOI 10.1038/nbt1141
   Wurm FM, 2004, NAT BIOTECHNOL, V22, P1393, DOI 10.1038/nbt1026
   Zhou HH, 2011, ANNU REV PHARMACOL, V51, P359, DOI 10.1146/annurev-pharmtox-010510-100510
   Zhou Joe X., 2008, Biotechnology Journal, V3, P1185, DOI 10.1002/biot.200800117
NR 38
TC 6
Z9 7
U1 0
U2 35
PU AMER CHEMICAL SOC
PI WASHINGTON
PA 1155 16TH ST, NW, WASHINGTON, DC 20036 USA
SN 0021-9584
EI 1938-1328
J9 J CHEM EDUC
JI J. Chem. Educ.
PD DEC
PY 2012
VL 89
IS 12
BP 1537
EP 1542
DI 10.1021/ed200392h
PG 6
WC Chemistry, Multidisciplinary; Education, Scientific Disciplines
WE Science Citation Index Expanded (SCI-EXPANDED)
SC Chemistry; Education & Educational Research
GA 040MB
UT WOS:000311325600011
DA 2022-04-10
ER

PT J
AU Park, SW
   Huq, M
   Hu, XL
   Wei, LN
AF Park, SW
   Huq, M
   Hu, XL
   Wei, LN
TI Tyrosine nitration on p65 - A novel mechanism to rapidly inactivate
   nuclear factor-kappa B
SO MOLECULAR & CELLULAR PROTEOMICS
LA English
DT Article
ID NITRIC-OXIDE SYNTHASE; S-NITROSYLATION; CONSTITUTIVE ACTIVATION;
   prostate cancer; gene expression; breast cancer; TRANSCRIPTION;
   INHIBITION; KINASE; PHOSPHORYLATION
AB NO is an important factor that induces post-translational modification of proteins by cellular reduction and oxidation mechanism: cysteinyl-nitrosylation or Tyr nitration. Nuclear factor (NF)-kappa B activity can be rapidly suppressed by sodium nitroprusside, a NO donor. This effect was effectively reversed by peroxynitrite scavenger deferoxamine, suggesting a Tyr nitration-mediated mechanism. Western blot with nitrotyrosine- specific antibody demonstrated that the p65 subunit of NF-kappa B was predominantly nitrated on Tyr residues. Tyr nitration of p65 induced its dissociation from p50, its association with I kappa B alpha, and subsequent sequestration of p65 in the cytoplasm by I kappa B alpha-mediated export. Liquid chromatography-coupled nanoelectrospray mass spectrometry revealed specific nitration on Tyr-66 and Tyr-152 residues of p65. Mutation studies confirmed that both Tyr-66 and Tyr-152 residues were important for the direct effects of NO on p65, which resulted in more p65 export and inactivation of NF-kappa B activity. This study identified a novel and efficient pathway where NO rapidly inactivated NF-kappa B activity by inducing Tyr nitration on p65.
C1 Univ Minnesota, Sch Med, Dept Pharmacol, Minneapolis, MN 55455 USA.
RP Wei, LN (corresponding author), Univ Minnesota, Sch Med, Dept Pharmacol, 6-120 Jackson Hall,321 Church St SE, Minneapolis, MN 55455 USA.
EM weixx009@umn.edu
OI Park, Sung Wook/0000-0002-3393-8826
FU NATIONAL INSTITUTE OF DIABETES AND DIGESTIVE AND KIDNEY DISEASESUnited
   States Department of Health & Human ServicesNational Institutes of
   Health (NIH) - USANIH National Institute of Diabetes & Digestive &
   Kidney Diseases (NIDDK) [R01DK060521, R01DK054733] Funding Source: NIH
   RePORTER; NATIONAL INSTITUTE ON DRUG ABUSEUnited States Department of
   Health & Human ServicesNational Institutes of Health (NIH) - USANIH
   National Institute on Drug Abuse (NIDA)European Commission [K02DA013926,
   P50DA011806, R01DA011190] Funding Source: NIH RePORTER; NIDA NIH
   HHSUnited States Department of Health & Human ServicesNational
   Institutes of Health (NIH) - USANIH National Institute on Drug Abuse
   (NIDA) [DA11190, K02 DA13926, DA11806] Funding Source: Medline; NIDDK
   NIH HHSUnited States Department of Health & Human ServicesNational
   Institutes of Health (NIH) - USANIH National Institute of Diabetes &
   Digestive & Kidney Diseases (NIDDK) [DK54733, DK60521] Funding Source:
   Medline
CR Baek SH, 2002, CELL, V110, P55, DOI 10.1016/S0092-8674(02)00809-7
   Baldwin AS, 2001, J CLIN INVEST, V107, P241, DOI 10.1172/JCI11991
   Birbach A, 2002, J BIOL CHEM, V277, P10842, DOI 10.1074/jbc.M112475200
   Bogdan C, 2001, TRENDS CELL BIOL, V11, P66, DOI 10.1016/S0962-8924(00)01900-0
   Chang K, 2004, EXP MOL MED, V36, P311, DOI 10.1038/emm.2004.42
   Chen LF, 2001, SCIENCE, V293, P1653, DOI 10.1126/science.1062374
   Chen LF, 2002, EMBO J, V21, P6539, DOI 10.1093/emboj/cdf660
   Cogswell PC, 2000, ONCOGENE, V19, P1123, DOI 10.1038/sj.onc.1203412
   COLASANTI M, 1995, J BIOL CHEM, V270, P26731, DOI 10.1074/jbc.270.45.26731
   delaTorre A, 1999, J IMMUNOL, V162, P4101
   Dixit V, 2002, CELL, V111, P615, DOI 10.1016/S0092-8674(02)01166-2
   FRANZOSO G, 1992, NATURE, V359, P339, DOI 10.1038/359339a0
   Ghosh S, 2002, CELL, V109, pS81, DOI 10.1016/S0092-8674(02)00703-1
   Haqqani AS, 2002, J BIOL CHEM, V277, P3614, DOI 10.1074/jbc.M105730200
   Huguet C, 1997, ONCOGENE, V15, P2965, DOI 10.1038/sj.onc.1201471
   IGNARRO LJ, 1987, P NATL ACAD SCI USA, V84, P9265, DOI 10.1073/pnas.84.24.9265
   Jang MK, 2001, J BIOL CHEM, V276, P20005, DOI 10.1074/jbc.M010211200
   Kapahi P, 2000, J BIOL CHEM, V275, P36062, DOI 10.1074/jbc.M007204200
   Karin M, 2002, NAT REV CANCER, V2, P301, DOI 10.1038/nrc780
   Karin M, 2002, NAT IMMUNOL, V3, P221, DOI 10.1038/ni0302-221
   Kim DW, 2000, CARCINOGENESIS, V21, P871, DOI 10.1093/carcin/21.5.871
   Kucharczak J, 2003, ONCOGENE, V22, P8961, DOI 10.1038/sj.onc.1207230
   Li QT, 2002, NAT REV IMMUNOL, V2, P725, DOI 10.1038/nri910
   Madrid LV, 2001, J BIOL CHEM, V276, P18934, DOI 10.1074/jbc.M101103200
   Marshall HE, 2001, BIOCHEMISTRY-US, V40, P1688, DOI 10.1021/bi002239y
   Matthews JR, 1996, NUCLEIC ACIDS RES, V24, P2236, DOI 10.1093/nar/24.12.2236
   Nakamura Y, 2002, MOL CELL BIOL, V22, P5563, DOI 10.1128/MCB.22.15.5563-5574.2002
   Nakshatri H, 1997, MOL CELL BIOL, V17, P3629, DOI 10.1128/MCB.17.7.3629
   Park SW, 2003, J BIOL CHEM, V278, P29776, DOI 10.1074/jbc.M303306200
   Park SW, 2002, J NEUROSCI, V22, P7941
   Reynaert NL, 2004, P NATL ACAD SCI USA, V101, P8945, DOI 10.1073/pnas.0400588101
   Rocha S, 2003, MOL CELL BIOL, V23, P4713, DOI 10.1128/MCB.23.13.4713-4727.2003
   Spiecker M, 1997, J BIOL CHEM, V272, P30969, DOI 10.1074/jbc.272.49.30969
   Suh J, 2004, J CELL BIOCHEM, V91, P100, DOI 10.1002/jcb.10729
   Wang CY, 1998, SCIENCE, V281, P1680, DOI 10.1126/science.281.5383.1680
   Wang D, 2000, J BIOL CHEM, V275, P32592, DOI 10.1074/jbc.M001358200
   XIE QW, 1994, J BIOL CHEM, V269, P4705
   Zerbini LF, 2003, CANCER RES, V63, P2206
   Zhong HH, 1998, MOL CELL, V1, P661, DOI 10.1016/S1097-2765(00)80066-0
   Zhong HH, 2002, MOL CELL, V9, P625, DOI 10.1016/S1097-2765(02)00477-X
NR 40
TC 76
Z9 78
U1 0
U2 4
PU AMER SOC BIOCHEMISTRY MOLECULAR BIOLOGY INC
PI BETHESDA
PA 9650 ROCKVILLE PIKE, BETHESDA, MD 20814-3996 USA
SN 1535-9476
EI 1535-9484
J9 MOL CELL PROTEOMICS
JI Mol. Cell. Proteomics
PD MAR
PY 2005
VL 4
IS 3
BP 300
EP 309
DI 10.1074/mcp.M400195-MCP200
PG 10
WC Biochemical Research Methods
WE Science Citation Index Expanded (SCI-EXPANDED)
SC Biochemistry & Molecular Biology
GA 906CL
UT WOS:000227618000007
PM 15657065
OA hybrid
DA 2022-04-10
ER

PT J
AU Huang, QL
   Qin, DJ
   Pei, DQ
   Vermeulen, M
   Zhang, XF
AF Huang, Qiuling
   Qin, Dajiang
   Pei, Duanqing
   Vermeulen, Michiel
   Zhang, Xiaofei
TI UBE2O and USP7 co-regulate RECQL4 ubiquitinylation and homologous
   recombination-mediated DNA repair
SO FASEB JOURNAL
LA English
DT Article
DE DNA damage repair; multi-monoubiquitinylation; RECQL4; UBE2O; USP7
ID GENOMIC INSTABILITY; HELICASE RECQL4; UBIQUITINATION; CANCER;
   MONOUBIQUITINATION; ASSOCIATION; ACTIVATION; MUTATIONS; ENZYMES; DOMAIN
AB The human RecQ DNA helicase, RECQL4, plays a pivotal role in maintaining genomic stability by regulating the DNA double-strand breaks (DSBs) repair pathway, and is, thus, involved in the regulation of aging and cancer onset. However, the regulatory mechanism of RECQL4, especially its post-translational modification, have not been fully illustrated. Here, we report that the E2/E3 hybrid ubiquitin-conjugating enzyme, UBE2O, physically interacts with RECQL4, and mediates the multi-monoubiquitinylation of RECQL4, subsequently leading to its proteasomal degradation. Functionally, we showed that UBE2O inhibits homologous recombination (HR)-mediated DSBs repair, and this inhibition depends on its E2 catalytic activity and RECQL4 expression. Mechanistically, we showed that UBE2O attenuates the interaction of RECQL4 and DNA damage repair proteins, the MRE11-RAD50-NBS1 complex and CtIP. Furthermore, we show that deubiquitinylase USP7 interacts with both UBE2O and RECQL4, and in that it antagonizes UBE2O-mediated regulation of RECQL4 stability and function. Collectively, we found a novel regulatory mechanism of ubiquitin-mediated regulation of RECQL4 in HR-mediated DSBs repair process.
C1 [Huang, Qiuling; Qin, Dajiang; Pei, Duanqing; Zhang, Xiaofei] Chinese Acad Sci, CAS Key Lab Regenerat Biol, Guangdong Prov Key Lab Stem Cell & Regenerat Med, Guangzhou Inst Biomed & Hlth,GIBH HKU Guangdong H, Guangzhou 510530, Peoples R China.
   [Huang, Qiuling; Zhang, Xiaofei] Guangzhou Regenerat Med & Hlth Guangdong Lab, Ctr Cell Lineage & Atlas, BioLand Lab, Guangzhou, Peoples R China.
   [Pei, Duanqing] Westlake Univ, Sch Life Sci, Lab Cell Fate Control, Hangzhou, Peoples R China.
   [Vermeulen, Michiel] Radboud Univ Nijmegen, Oncode Inst, Radboud Inst Mol Life Sci, Dept Mol Biol,Fac Sci, Nijmegen, Netherlands.
RP Zhang, XF (corresponding author), Chinese Acad Sci, CAS Key Lab Regenerat Biol, Guangdong Prov Key Lab Stem Cell & Regenerat Med, Guangzhou Inst Biomed & Hlth,GIBH HKU Guangdong H, Guangzhou 510530, Peoples R China.
EM zhang_xiaofei@gibh.ac.cn
RI Vermeulen, Michiel/C-8883-2013
OI Vermeulen, Michiel/0000-0003-0836-6894; Zhang,
   Xiaofei/0000-0002-2564-9258
FU Science and Technology Planning Project of Guangdong Province
   [2018B030306047, 202081212060052]; National Natural Science
   FoundationNational Natural Science Foundation of China (NSFC) [31770889,
   31801180]; Guangzhou Science and Technology Project [201904010469];
   Guangzhou Regenerative Medicine and Health Guangdong Laboratory project
   [2018GZR110104003]
FX Science and Technology Planning Project of Guangdong Province,
   Grant/Award Number: 2018B030306047 and 202081212060052: National Natural
   Science Foundation, Grant/Award Number: 31770889 and 31801180; Guangzhou
   Science and Technology Project, Grant/Award Number: 201904010469;
   Guangzhou Regenerative Medicine and Health Guangdong Laboratory project,
   Grant/Award Number: 2018GZR110104003
CR Akutsu M, 2016, J CELL SCI, V129, P875, DOI 10.1242/jcs.183954
   Chen SP, 2018, J BIOL CHEM, V293, P11296, DOI 10.1074/jbc.RA117.001432
   Croteau DL, 2012, TRENDS GENET, V28, P624, DOI 10.1016/j.tig.2012.08.003
   Deshaies RJ, 2009, ANNU REV BIOCHEM, V78, P399, DOI 10.1146/annurev.biochem.78.101807.093809
   Dietschy T, 2009, J CELL SCI, V122, P1258, DOI 10.1242/jcs.037747
   Dimova NV, 2012, NAT CELL BIOL, V14, P168, DOI 10.1038/ncb2425
   Duan SL, 2020, NUCLEIC ACIDS RES, V48, P6530, DOI 10.1093/nar/gkaa392
   Grice GL, 2016, CELL MOL LIFE SCI, V73, P3497, DOI 10.1007/s00018-016-2255-5
   Huang QL, 2020, PROTEOMICS, V20, DOI 10.1002/pmic.201900100
   Huang YM, 2021, CELL DEATH DIFFER, V28, P671, DOI 10.1038/s41418-020-00616-8
   Kim RQ, 2017, J MOL BIOL, V429, P3395, DOI 10.1016/j.jmb.2017.05.028
   Kitao S, 1999, NAT GENET, V22, P82, DOI 10.1038/8788
   Kohzaki M, 2020, INT J CANCER, V146, P3098, DOI 10.1002/ijc.32670
   Li YH, 2014, J BIOL CHEM, V289, P5097, DOI 10.1074/jbc.M113.533109
   Liang KW, 2017, CELL, V168, P59, DOI 10.1016/j.cell.2016.12.011
   Lim KL, 2005, J NEUROSCI, V25, P2002, DOI 10.1523/JNEUROSCI.4474-04.2005
   Lu HM, 2017, NAT COMMUN, V8, DOI 10.1038/s41467-017-02146-3
   Lu HM, 2016, CELL REP, V16, P161, DOI 10.1016/j.celrep.2016.05.079
   Mann MB, 2005, HUM MOL GENET, V14, P813, DOI 10.1093/hmg/ddi075
   Mashtalir N, 2014, MOL CELL, V54, P392, DOI 10.1016/j.molcel.2014.03.002
   Mevissen TET, 2017, ANNU REV BIOCHEM, V86, P159, DOI 10.1146/annurev-biochem-061516-044916
   Mo DL, 2018, CANCER LETT, V413, P1, DOI 10.1016/j.canlet.2017.10.021
   Mo DL, 2016, CANCER RES, V76, P3057, DOI 10.1158/0008-5472.CAN-15-2361
   Narayanaswamy PB, 2016, CELL DEATH DIS, V7, DOI 10.1038/cddis.2016.291
   Negrini S, 2010, NAT REV MOL CELL BIO, V11, P220, DOI 10.1038/nrm2858
   Nguyen AT, 2017, SCIENCE, V357, DOI 10.1126/science.aan0218
   Pierce AJ, 1999, GENE DEV, V13, P2633, DOI 10.1101/gad.13.20.2633
   Schulman BA, 2009, NAT REV MOL CELL BIO, V10, P319, DOI 10.1038/nrm2673
   Shamanna RA, 2014, CARCINOGENESIS, V35, P2415, DOI 10.1093/carcin/bgu137
   Shi RN, 2021, CELL BIOSCI, V11, DOI 10.1186/s13578-021-00659-5
   Siitonen HA, 2003, HUM MOL GENET, V12, P2837, DOI 10.1093/hmg/ddg306
   Singh DK, 2010, AGING CELL, V9, P358, DOI 10.1111/j.1474-9726.2010.00562.x
   Smeets MF, 2014, J CLIN INVEST, V124, P3551, DOI 10.1172/JCI75334
   Su DX, 2018, J CLIN INVEST, V128, P4280, DOI 10.1172/JCI120518
   Swatek KN, 2016, CELL RES, V26, P399, DOI 10.1038/cr.2016.39
   Tyanova S, 2016, NAT PROTOC, V11, P2301, DOI 10.1038/nprot.2016.136
   Ullah K, 2019, FEBS J, V286, P2018, DOI 10.1111/febs.14708
   van Brabant AJ, 2000, ANNU REV GENOM HUM G, V1, P409, DOI 10.1146/annurev.genom.1.1.409
   Van Maldergem L, 2006, J MED GENET, V43, P148, DOI 10.1136/jmg.2005.031781
   Vila IK, 2017, CANCER CELL, V31, P208, DOI 10.1016/j.ccell.2017.01.003
   Wang XL, 2007, J CELL BIOL, V177, P613, DOI 10.1083/jcb.200611063
   Xu GQ, 2010, NAT BIOTECHNOL, V28, P868, DOI 10.1038/nbt.1654
   Xu XH, 2009, EMBO J, V28, P3005, DOI 10.1038/emboj.2009.235
   Xu YJ, 2017, J HEMATOL ONCOL, V10, DOI 10.1186/s13045-017-0499-7
   Ye YH, 2009, NAT REV MOL CELL BIO, V10, P755, DOI 10.1038/nrm2780
   Zhang XF, 2018, NAT PROTOC, V13, P530, DOI 10.1038/nprot.2017.147
   Zhang XF, 2017, MOL CELL, V65, P941, DOI 10.1016/j.molcel.2017.01.004
   Zhang XF, 2013, EMBO J, V32, P996, DOI 10.1038/emboj.2013.38
   Zhang XF, 2013, CELL RES, V23, P366, DOI 10.1038/cr.2013.21
   Zhou FF, 2012, J BIOL CHEM, V287, P11002, DOI 10.1074/jbc.M111.328187
   Zhou J, 2018, MED CHEM, V14, P3, DOI 10.2174/1573406413666171020115539
NR 51
TC 0
Z9 0
U1 3
U2 3
PU WILEY
PI HOBOKEN
PA 111 RIVER ST, HOBOKEN 07030-5774, NJ USA
SN 0892-6638
EI 1530-6860
J9 FASEB J
JI Faseb J.
PD JAN
PY 2022
VL 36
IS 1
AR e22112
DI 10.1096/fj.202100974RRR
PG 18
WC Biochemistry & Molecular Biology; Biology; Cell Biology
WE Science Citation Index Expanded (SCI-EXPANDED)
SC Biochemistry & Molecular Biology; Life Sciences & Biomedicine - Other
   Topics; Cell Biology
GA XV5OR
UT WOS:000734992000038
PM 34921745
OA hybrid
DA 2022-04-10
ER

PT J
AU Repnik, U
   Starr, AE
   Overall, CM
   Turk, B
AF Repnik, Urska
   Starr, Amanda E.
   Overall, Christopher M.
   Turk, Boris
TI Cysteine Cathepsins Activate ELR Chemokines and Inactivate Non-ELR
   Chemokines
SO JOURNAL OF BIOLOGICAL CHEMISTRY
LA English
DT Article
ID HEPARIN-LIKE GLYCOSAMINOGLYCANS; CXC CHEMOKINES; GRO-ALPHA; IN-VIVO;
   CELL-MIGRATION; PROCATHEPSIN-B; CUTTING EDGE; BINDING; CANCER;
   CHEMOATTRACTANT
AB Cysteine cathepsins are primarily lysosomal proteases involved in general protein turnover, but they also have specific proteolytic functions in antigen presentation and bone remodeling. Cathepsins are most stable at acidic pH, although growing evidence indicates that they have physiologically relevant activity also at neutral pH. Post-translational proteolytic processing of mature chemokines is a key, yet underappreciated, level of chemokine regulation. Although the role of selected serine proteases and matrix metalloproteases in chemokine processing has long been known, little has been reported about the role of cysteine cathepsins. Here we evaluated cleavage of CXC ELR (CXCL1, -2, -3, -5, and -8) and non-ELR (CXCL9-12) chemokines by cysteine cathepsins B, K, L, and S at neutral pH by high resolution Tris-Tricine SDS-PAGE and matrix-assisted laser desorption ionization time-of-flight mass spectrometry. Whereas cathepsin B cleaved chemokines especially in the C-terminal region, cathepsins K, L, and S cleaved chemokines at the N terminus with glycosaminoglycans modulating cathepsin processing of chemokines. The functional consequences of the cleavages were determined by Ca2+ mobilization and chemotaxis assays. We show that cysteine cathepsins inactivate and in some cases degrade non-ELR CXC chemokines CXCL9-12. In contrast, cathepsins specifically process ELR CXC chemokines CXCL1, -2, -3, -5, and -8 N-terminally to the ELR motif, thereby generating agonist forms. This study suggests that cysteine cathepsins regulate chemokine activity and thereby leukocyte recruitment during protective or pathological inflammation.
C1 [Repnik, Urska; Turk, Boris] Jozef Stefan Inst, Dept Biochem & Mol & Struct Biol, SI-1000 Ljubljana, Slovenia.
   [Starr, Amanda E.; Overall, Christopher M.] Univ British Columbia, Dept Biochem & Mol Biol, Vancouver, BC V6T 1Z3, Canada.
   [Overall, Christopher M.] Univ British Columbia, Dept Oral Biol & Med Sci, Vancouver, BC V6T 1Z3, Canada.
   [Turk, Boris] Ctr Excellence Integrated Approaches Chem & Biol, SI-1000 Ljubljana, Slovenia.
   [Turk, Boris] Univ Ljubljana, Fac Chem & Chem Technol, SI-1000 Ljubljana, Slovenia.
RP Turk, B (corresponding author), Jozef Stefan Inst, Dept Biochem & Mol & Struct Biol, Jamova 39, SI-1000 Ljubljana, Slovenia.
EM chris.overall@ubc.ca; boris.turk@ijs.si
OI Turk, Boris/0000-0002-9007-5764
FU Slovene Research AgencySlovenian Research Agency - Slovenia [P1-0140,
   J1-6739, N1-0022]; Canadian Institutes of Health Research (CIHR)Canadian
   Institutes of Health Research (CIHR); Michael Smith Research Foundation
   (University of British Columbia Centre for Blood Research); British
   Columbia Proteomics Network; Natural Sciences and Engineering Research
   Council of CanadaNatural Sciences and Engineering Research Council of
   Canada (NSERC)CGIAR; Michael Smith Foundation for Health ResearchMichael
   Smith Foundation for Health Research; CIHRCanadian Institutes of Health
   Research (CIHR) [STP-53877]
FX This work was supported by Grants P1-0140, J1-6739, and N1-0022 from the
   Slovene Research Agency (to B. T.). This research was also supported by
   a Canadian Institutes of Health Research (CIHR) grant and an
   Infrastructure Grant from the Michael Smith Research Foundation
   (University of British Columbia Centre for Blood Research) and the
   British Columbia Proteomics Network.; Supported by the Natural Sciences
   and Engineering Research Council of Canada, the Michael Smith Foundation
   for Health Research, and CIHR Strategic Training Program STP-53877.
CR Ahuja SK, 1996, J BIOL CHEM, V271, P20545, DOI 10.1074/jbc.271.34.20545
   Ajami K, 2008, FEBS LETT, V582, P819, DOI 10.1016/j.febslet.2008.02.005
   Almeida PC, 2001, J BIOL CHEM, V276, P944, DOI 10.1074/jbc.M003820200
   Almeida PC, 1999, J BIOL CHEM, V274, P30433, DOI 10.1074/jbc.274.43.30433
   Bellac CL, 2014, CELL REP, V9, P618, DOI 10.1016/j.celrep.2014.09.006
   Belperio JA, 2000, J LEUKOCYTE BIOL, V68, P1
   Biniossek ML, 2011, J PROTEOME RES, V10, P5363, DOI 10.1021/pr200621z
   Bromme D, 2011, BIOL EXTRACELL MATR, P23, DOI 10.1007/978-3-642-16861-1_2
   Bromme D, 2004, METHODS, V32, P199, DOI 10.1016/S1046-2023(03)00212-3
   Caglic D, 2007, J BIOL CHEM, V282, P33076, DOI 10.1074/jbc.M705761200
   Caglic D, 2013, BIOL CHEM, V394, P307, DOI 10.1515/hsz-2012-0283
   Caglic D, 2011, BIOORGAN MED CHEM, V19, P1055, DOI 10.1016/j.bmc.2010.10.028
   Clark AK, 2012, ARTHRITIS RHEUM-US, V64, P2038, DOI 10.1002/art.34351
   Clark AK, 2009, J NEUROSCI, V29, P6945, DOI 10.1523/JNEUROSCI.0828-09.2009
   ClarkLewis I, 1997, METHOD ENZYMOL, V287, P233
   Cox JH, 2008, J BIOL CHEM, V283, P19389, DOI 10.1074/jbc.M800266200
   Dean RA, 2008, BLOOD, V112, P3455, DOI 10.1182/blood-2007-12-129080
   Dean RA, 2007, MOL CELL PROTEOMICS, V6, P611, DOI 10.1074/mcp.M600341-MCP200
   Fonovic M, 2014, BBA-GEN SUBJECTS, V1840, P2560, DOI 10.1016/j.bbagen.2014.03.017
   Fortelny N, 2014, PLOS BIOL, V12, DOI 10.1371/journal.pbio.1001869
   Gocheva V, 2007, CELL CYCLE, V6, P60, DOI 10.4161/cc.6.1.3669
   Gocheva V, 2010, GENE DEV, V24, P241, DOI 10.1101/gad.1874010
   Hasan L, 2006, J IMMUNOL, V176, P6512, DOI 10.4049/jimmunol.176.11.6512
   Hou WS, 2002, ARTHRITIS RHEUM, V46, P663, DOI 10.1002/art.10114
   Illy C, 1997, J BIOL CHEM, V272, P1197, DOI 10.1074/jbc.272.2.1197
   Ishidoh K, 1995, BIOCHEM BIOPH RES CO, V217, P624, DOI 10.1006/bbrc.1995.2820
   Jones BA, 2013, ARTHRITIS RHEUM-US, V65, P2814, DOI 10.1002/art.38095
   King AG, 2000, J IMMUNOL, V164, P3774, DOI 10.4049/jimmunol.164.7.3774
   KIRSCHKE H, 1989, BIOCHEM J, V264, P467, DOI 10.1042/bj2640467
   Lemaire R, 1997, BRIT J RHEUMATOL, V36, P735
   Li ZQ, 2004, J BIOL CHEM, V279, P5470, DOI 10.1074/jbc.M310349200
   Li ZQ, 2002, J BIOL CHEM, V277, P28669, DOI 10.1074/jbc.M204004200
   Ludwig A, 2002, J LEUKOCYTE BIOL, V72, P183
   McQuibban GA, 2000, SCIENCE, V289, P1202, DOI 10.1126/science.289.5482.1202
   McQuibban GA, 2002, BLOOD, V100, P1160, DOI 10.1182/blood.V100.4.1160.h81602001160_1160_1167
   McQuibban GA, 2001, J BIOL CHEM, V276, P43503, DOI 10.1074/jbc.M107736200
   Mihelic M, 2008, J BIOL CHEM, V283, P14453, DOI 10.1074/jbc.M801283200
   Mohamed MM, 2006, NAT REV CANCER, V6, P764, DOI 10.1038/nrc1949
   Mohamed MM, 2010, CELL PHYSIOL BIOCHEM, V25, P315, DOI 10.1159/000276564
   Mortier A, 2011, EXP CELL RES, V317, P642, DOI 10.1016/j.yexcr.2010.11.016
   Mortier A, 2008, PHARMACOL THERAPEUT, V120, P197, DOI 10.1016/j.pharmthera.2008.08.006
   Nufer O, 1999, BIOCHEMISTRY-US, V38, P636, DOI 10.1021/bi981294s
   Ohashi K, 2003, BBA-PROTEINS PROTEOM, V1649, P30, DOI 10.1016/S1570-9639(03)00152-3
   Overall CM, 2007, NAT REV MOL CELL BIO, V8, P245, DOI 10.1038/nrm2120
   Proost P, 2001, BLOOD, V98, P3554, DOI 10.1182/blood.V98.13.3554
   Proost P, 2007, BLOOD, V110, P37, DOI 10.1182/blood-2006-10-049072
   Proudfoot AEI, 2006, BIOCHEM SOC T, V34, P422, DOI 10.1042/BST0340422
   Proudfoot AEI, 2003, P NATL ACAD SCI USA, V100, P1885, DOI 10.1073/pnas.0334864100
   Rajagopalan L, 2006, BIOSCIENCE REP, V26, P325, DOI 10.1007/s10540-006-9025-9
   Rozman J, 1999, FEBS LETT, V459, P358, DOI 10.1016/S0014-5793(99)01302-2
   Salanga CL, 2011, EXP CELL RES, V317, P590, DOI 10.1016/j.yexcr.2011.01.004
   Starr AE, 2012, J BIOL CHEM, V287, P13382, DOI 10.1074/jbc.M111.314179
   Starr AE, 2012, J BIOL CHEM, V287, P5848, DOI 10.1074/jbc.M111.314609
   Starr AE, 2009, METHOD ENZYMOL, V461, P281, DOI 10.1016/S0076-6879(09)05413-5
   Staudt ND, 2012, STEM CELLS DEV, V21, P1924, DOI 10.1089/scd.2011.0307
   Tester AM, 2007, PLOS ONE, V2, DOI 10.1371/journal.pone.0000312
   Turk B, 1999, EUR J BIOCHEM, V259, P926, DOI 10.1046/j.1432-1327.1999.00145.x
   Turk B, 2012, EMBO J, V31, P1630, DOI 10.1038/emboj.2012.42
   Turk B, 2009, J BIOL CHEM, V284, P21783, DOI 10.1074/jbc.R109.023820
   Turk D, 1998, BIOL CHEM, V379, P137, DOI 10.1515/bchm.1998.379.2.137
   Turk V, 2012, BBA-PROTEINS PROTEOM, V1824, P68, DOI 10.1016/j.bbapap.2011.10.002
   Van den Steen PE, 2000, BLOOD, V96, P2673, DOI 10.1182/blood.V96.8.2673.h8002673_2673_2681
   Vandercappellen J, 2008, CANCER LETT, V267, P226, DOI 10.1016/j.canlet.2008.04.050
   Vasiljeva O, 2005, FEBS LETT, V579, P1285, DOI 10.1016/j.febslet.2004.12.093
   Vasiljeva O, 2008, BIOCHIMIE, V90, P380, DOI 10.1016/j.biochi.2007.10.004
   Vasiljeva O, 2007, CURR PHARM DESIGN, V13, P387, DOI 10.2174/138161207780162962
   WALZ A, 1989, J EXP MED, V170, P1745, DOI 10.1084/jem.170.5.1745
   Wuyts A, 1999, EUR J BIOCHEM, V260, P421, DOI 10.1046/j.1432-1327.1999.00166.x
   Zhang KY, 2003, NAT NEUROSCI, V6, P1064, DOI 10.1038/nn1127
NR 69
TC 49
Z9 50
U1 0
U2 10
PU AMER SOC BIOCHEMISTRY MOLECULAR BIOLOGY INC
PI BETHESDA
PA 9650 ROCKVILLE PIKE, BETHESDA, MD 20814-3996 USA
EI 1083-351X
J9 J BIOL CHEM
JI J. Biol. Chem.
PD MAY 29
PY 2015
VL 290
IS 22
BP 13800
EP 13811
DI 10.1074/jbc.M115.638395
PG 12
WC Biochemistry & Molecular Biology
WE Science Citation Index Expanded (SCI-EXPANDED)
SC Biochemistry & Molecular Biology
GA CJ2KK
UT WOS:000355313000015
PM 25833952
OA Green Published, hybrid
DA 2022-04-10
ER

PT J
AU Leng, L
   Xu, CM
   Wei, C
   Zhang, JY
   Liu, BY
   Ma, J
   Li, N
   Qin, WJ
   Zhang, WJ
   Zhang, CP
   Xing, XH
   Zhai, LH
   Yang, F
   Li, MS
   Jin, CZ
   Yuan, YZ
   Xu, P
   Qin, J
   Xie, HW
   He, FC
   Wang, J
AF Leng, Ling
   Xu, Changming
   Wei, Chao
   Zhang, Jiyang
   Liu, Boya
   Ma, Jie
   Li, Ning
   Qin, Weijie
   Zhang, Wanjun
   Zhang, Chengpu
   Xing, Xiaohua
   Zhai, Linhui
   Yang, Fan
   Li, Mansheng
   Jin, Chaozhi
   Yuan, Yanzhi
   Xu, Ping
   Qin, Jun
   Xie, Hongwei
   He, Fuchu
   Wang, Jian
TI A Proteomics Strategy for the Identification of FAT10-Modified Sites by
   Mass Spectrometry
SO JOURNAL OF PROTEOME RESEARCH
LA English
DT Article
DE FAT10; post-translational modification; mass spectrometry
ID UBIQUITIN-LIKE PROTEIN; STATISTICAL-MODEL; FAT10; TANDEM; EXPRESSION;
   ACCURACY; SIGNAL; BINDS; GENE; SUMO
AB The ubiquitin-like protein FAT10 (HLA-F adjacent transcript 10) is uniquely expressed in mammals. The fat 1 0 gene is encoded in the MHC class I locus in the human genome and is related to some specific processes, such as apoptosis, immune response, and cancer. However, biological knowledge of FAT 10 is limited, owing to the lack of identification of its conjugates. FAT10 covalently modifies proteins in eukaryotes, but only a few substrates of FAT 10 have been reported until now, and no FATylated sites have been identified. Here, we report the proteome-scale identification of FATylated proteins by liquid chromatography coupled with tandem mass spectrometry (LC-MS/MS). We identified 175 proteins with high confidence as FATylated candidates. A total of 13 modified sites were identified for the first time by a modified search of the raw MS data. The modified sites were highly enriched with hydrophilic amino acids. Furthermore, the FATylation processes of hnRNP C2, PCNA, and PDIA3 were verified by a coimmunoprecipitation assay. We confirmed that most of the substrates were covalently attached to a FAT 10 functional distribution of the FAT 10 target suggests that FAT 10 participates in various biological processes, such as translation, protein folding, RNA processing, and macromolecular complex assembly. These results should be very useful for investigating the biological functions of FAT10.
C1 [Leng, Ling; Liu, Boya; Ma, Jie; Li, Ning; Qin, Weijie; Zhang, Wanjun; Zhang, Chengpu; Xing, Xiaohua; Zhai, Linhui; Yang, Fan; Li, Mansheng; Jin, Chaozhi; Yuan, Yanzhi; Xu, Ping; Qin, Jun; He, Fuchu; Wang, Jian] Beijing Inst Radiat Med, Natl Ctr Prot Sci Beijing, Beijing Proteome Res Ctr, State Key Lab Prote, Beijing 102206, Peoples R China.
   [Xu, Changming; Zhang, Jiyang; Xie, Hongwei] Natl Univ Def Technol, Coll Mechatron & Automat, Dept Automat Control, Changsha 410073, Hunan, Peoples R China.
   [Leng, Ling; Liu, Boya; Ma, Jie; Li, Ning; Qin, Weijie; Zhang, Wanjun; Zhang, Chengpu; Xing, Xiaohua; Zhai, Linhui; Yang, Fan; Li, Mansheng; Jin, Chaozhi; Yuan, Yanzhi; Xu, Ping; Qin, Jun; Xie, Hongwei; Wang, Jian] Natl Engn Res Ctr Prot Drugs, Beijing 102206, Peoples R China.
   [Wei, Chao] Chinese Acad Med Sci, Inst Basic Med Sci, Beijing 10005, Peoples R China.
   [Wei, Chao] Peking Union Med Coll, Sch Basic Med, Beijing 10005, Peoples R China.
   [Qin, Jun] Baylor Coll Med, Houston, TX 77030 USA.
RP He, FC (corresponding author), Beijing Inst Radiat Med, Natl Ctr Prot Sci Beijing, Beijing Proteome Res Ctr, State Key Lab Prote, Beijing 102206, Peoples R China.
EM hefc@bmi.ac.cn; wangjian@bmi.ac.cn
RI Li, Mansheng/AAA-7127-2022
OI Li, Mansheng/0000-0002-0778-0965; Qin, Weijie/0000-0002-7633-9786; Leng,
   Ling/0000-0002-6519-012X
FU Special Funds for Major State Basic Research of China [2011CB910600];
   National High-Tech Research and Development ProgramNational High
   Technology Research and Development Program of China [2012AA020201];
   National International Cooperation Project [2011DFB30370]; Beijing
   Municipal Natural Science FoundationBeijing Natural Science Foundation
   [5122014]; Beijing NOVA programBeijing Municipal Science & Technology
   Commission [2011014]
FX We thank Dr. Marcus Groettrup for the FAT10K0 expression construct. This
   work was supported in part by the Special Funds for Major State Basic
   Research of China (2011CB910600), the National High-Tech Research and
   Development Program (2012AA020201), the National International
   Cooperation Project (2011DFB30370), Beijing Municipal Natural Science
   Foundation (5122014), and Beijing NOVA program (2011014).
CR Aichem A., NAT COMMUN, V1, P1
   Aichem A, 2012, J CELL SCI, V125, P4576, DOI 10.1242/jcs.107789
   Bates EFM, 1997, EUR J IMMUNOL, V27, P2471, DOI 10.1002/eji.1830271002
   Buchsbaum S, 2012, MOL BIOL CELL, V23, P225, DOI 10.1091/mbc.E11-07-0609
   Burckstummer T, 2006, NAT METHODS, V3, P1013, DOI 10.1038/nmeth968
   Canaan A, 2006, MOL CELL BIOL, V26, P5180, DOI 10.1128/MCB.00966-05
   Chen JJ, 2011, CELL BIOCHEM BIOPHYS, V60, P47, DOI 10.1007/s12013-011-9187-3
   Chiu YH, 2007, MOL CELL, V27, P1014, DOI 10.1016/j.molcel.2007.08.020
   Cox J, 2008, NAT BIOTECHNOL, V26, P1367, DOI 10.1038/nbt.1511
   Craig R, 2004, BIOINFORMATICS, V20, P1466, DOI 10.1093/bioinformatics/bth092
   Denison C, 2005, MOL CELL PROTEOMICS, V4, P246, DOI 10.1074/mcp.M400154-MCP200
   Fan WF, 1996, IMMUNOGENETICS, V44, P97, DOI 10.1007/BF02660056
   Giannakopoulos NV, 2005, BIOCHEM BIOPH RES CO, V336, P496, DOI 10.1016/j.bbrc.2005.08.132
   Gong PF, 2010, J AM SOC NEPHROL, V21, P316, DOI 10.1681/ASN.2009050479
   Henkel W, 1999, BIOCHEMISTRY-US, V38, P13610, DOI 10.1021/bi9905157
   Hipp MS, 2005, MOL CELL BIOL, V25, P3483, DOI 10.1128/MCB.25.9.3483-3491.2005
   Hochstrasser M, 2000, NAT CELL BIOL, V2, pE153, DOI 10.1038/35019643
   Hochstrasser M, 2009, NATURE, V458, P422, DOI 10.1038/nature07958
   Hsiao HH, 2009, MOL CELL PROTEOMICS, V8, P2664, DOI 10.1074/mcp.M900087-MCP200
   Johnson ES, 2004, ANNU REV BIOCHEM, V73, P355, DOI 10.1146/annurev.biochem.73.011303.074118
   Keller A, 2002, ANAL CHEM, V74, P5383, DOI 10.1021/ac025747h
   Keller A, 2005, MOL SYST BIOL, V1, DOI 10.1038/msb4100024
   Kerscher O, 2006, ANNU REV CELL DEV BI, V22, P159, DOI 10.1146/annurev.cellbio.22.010605.093503
   Lee CGL, 2003, ONCOGENE, V22, P2592, DOI 10.1038/sj.onc.1206337
   Li TW, 2011, ARCH BIOCHEM BIOPHYS, V509, P164, DOI 10.1016/j.abb.2011.02.017
   Liu YC, 1999, P NATL ACAD SCI USA, V96, P4313, DOI 10.1073/pnas.96.8.4313
   Lukasiak S, 2008, ONCOGENE, V27, P6068, DOI 10.1038/onc.2008.201
   Matic I, 2008, MOL CELL PROTEOMICS, V7, P132, DOI 10.1074/mcp.M700173-MCP200
   McBryant SJ, 2010, CELL RES, V20, P519, DOI 10.1038/cr.2010.35
   McEwan WA, 2011, BIOESSAYS, V33, P803, DOI 10.1002/bies.201100093
   Nagashima Y, 2011, J BIOL CHEM, V286, P29594, DOI 10.1074/jbc.M111.261032
   Nesvizhskii AI, 2003, ANAL CHEM, V75, P4646, DOI 10.1021/ac0341261
   Raasi S, 2001, J BIOL CHEM, V276, P35334, DOI 10.1074/jbc.M105139200
   Raasi S, 1999, EUR J IMMUNOL, V29, P4030, DOI 10.1002/(SICI)1521-4141(199912)29:12<4030::AID-IMMU4030>3.0.CO;2-Y
   Rani N, 2012, NAT COMMUN, V3, DOI 10.1038/ncomms1752
   Rosas-Acosta G, 2005, MOL CELL PROTEOMICS, V4, P56, DOI 10.1074/mcp.M400149-MCP200
   Shteynberg D, 2011, MOL CELL PROTEOMICS, V10, DOI 10.1074/mcp.M111.007690
   Snyder A, 2009, J VIROL, V83, P11983, DOI 10.1128/JVI.00034-09
   Styers ML, 2008, AM J PHYSIOL-CELL PH, V294, pC1485, DOI 10.1152/ajpcell.00010.2008
   Vassileva MT, 2004, MOL CELL BIOL, V24, P3623, DOI 10.1128/MCB.24.9.3623-3632.2004
   Wood C, 2009, FEBS J, V276, P4109, DOI 10.1111/j.1742-4658.2009.07079.x
   Zhang DW, 2006, ONCOGENE, V25, P2318, DOI 10.1038/sj.onc.1209220
   Zhang WW, 2011, FEBS LETT, V585, P2786, DOI 10.1016/j.febslet.2011.04.044
NR 43
TC 17
Z9 18
U1 0
U2 21
PU AMER CHEMICAL SOC
PI WASHINGTON
PA 1155 16TH ST, NW, WASHINGTON, DC 20036 USA
SN 1535-3893
EI 1535-3907
J9 J PROTEOME RES
JI J. Proteome Res.
PD JAN
PY 2014
VL 13
IS 1
SI SI
BP 268
EP 276
DI 10.1021/pr400395k
PG 9
WC Biochemical Research Methods
WE Science Citation Index Expanded (SCI-EXPANDED)
SC Biochemistry & Molecular Biology
GA 286MF
UT WOS:000329472700027
PM 23862649
DA 2022-04-10
ER

PT J
AU Christmann, M
   Tomicic, MT
   Kaina, B
AF Christmann, M
   Tomicic, MT
   Kaina, B
TI Phosphorylation of mismatch repair proteins MSH2 and MSH6 affecting MutS
   alpha mismatch-binding activity
SO NUCLEIC ACIDS RESEARCH
LA English
DT Article
ID CASEIN KINASE-II; HUMAN-CELLS; dna damage; REPLICATION FIDELITY;
   METHYLATING AGENTS; ALKYLATING-AGENTS; HETERODUPLEX DNA; HMUTS-ALPHA;
   APOPTOSIS; CK2
AB Mismatch repair (MMR) is involved in the removal of mispaired bases from DNA and thus plays an important role in the maintenance of genomic stability and the prevention of mutations and cancer. Moreover, MMR triggers genotoxicity and apoptosis upon processing of DNA lesions such as O-6-methylguanine. Whereas the enzymology of MMR has been elucidated in great detail, only limited data are available concerning its regulation. Here we show that the major mismatch-binding proteins MSH2 and MSH6, forming the MutSalpha complex, are phosphorylated in vitro by protein kinase C and casein kinase II, but not by protein kinase A. Phosphorylation of MSH2 and MSH6 was also found within the cell, with MSH6 being more extensively phosphorylated than MSH2. Lack of MSH2 and MSH6 phosphorylation in vivo due to phosphate depletion, kinase inhibition (by H7 and quercetin) and treatment with phosphatases (CIP, SAP and lambda-PPase) significantly reduced mismatch-binding activity of MutSalpha. It also prevented methylation-induced nuclear translocation of the repair complex, indicating that nuclear translocation of MutSalpha upon mutagen treatment is dependent on protein phosphorylation. The finding that MSH2 and MSH6 are subject to phosphorylation resulting in increased mismatch binding by MutSalpha indicates a novel type of post-translational regulation of MMR which might be involved in the response of cells to genotoxic stress.
C1 Univ Mainz, Inst Toxicol, Div Appl Toxicol, D-55131 Mainz, Germany.
RP Kaina, B (corresponding author), Univ Mainz, Inst Toxicol, Div Appl Toxicol, Obere Zahlbacher Str 67, D-55131 Mainz, Germany.
RI Tomicic, Maja/S-1377-2019
OI Tomicic, Maja/0000-0001-9289-4168
CR AALTONEN LA, 1993, SCIENCE, V260, P812, DOI 10.1126/science.8484121
   ACKERMAN P, 1990, P NATL ACAD SCI USA, V87, P821, DOI 10.1073/pnas.87.2.821
   Alani E, 1997, MOL CELL BIOL, V17, P2436, DOI 10.1128/MCB.17.5.2436
   Belloni M, 1999, J NEUROCHEM, V72, P974, DOI 10.1046/j.1471-4159.1999.0720974.x
   Blackwell LJ, 1998, J BIOL CHEM, V273, P32055, DOI 10.1074/jbc.273.48.32055
   BRADFORD MM, 1976, ANAL BIOCHEM, V72, P248, DOI 10.1016/0003-2697(76)90527-3
   BRANCH P, 1993, NATURE, V362, P652, DOI 10.1038/362652a0
   BRANCH P, 1995, CANCER RES, V55, P2304
   Christmann M, 2000, J BIOL CHEM, V275, P36256, DOI 10.1074/jbc.M005377200
   Culligan KM, 2000, NUCLEIC ACIDS RES, V28, P463, DOI 10.1093/nar/28.2.463
   Desclozeaux M, 1998, J BIOL CHEM, V273, P7988, DOI 10.1074/jbc.273.14.7988
   Drummond JT, 1996, J BIOL CHEM, V271, P19645, DOI 10.1074/jbc.271.33.19645
   Duckett DR, 1996, P NATL ACAD SCI USA, V93, P6443, DOI 10.1073/pnas.93.13.6443
   FISHEL R, 1993, CELL, V75, P1027, DOI 10.1016/0092-8674(93)90546-3
   Fritz G, 1999, ONCOGENE, V18, P1033, DOI 10.1038/sj.onc.1202394
   GALLOWAY SM, 1995, MUTAT RES LETT, V346, P231, DOI 10.1016/0165-7992(95)90040-3
   GHOSH S, 1990, NATURE, V344, P678, DOI 10.1038/344678a0
   GOULD KL, 1985, CELL, V42, P849, DOI 10.1016/0092-8674(85)90281-8
   Gradia S, 1997, CELL, V91, P995, DOI 10.1016/S0092-8674(00)80490-0
   Guerra B, 1999, ELECTROPHORESIS, V20, P391, DOI 10.1002/(SICI)1522-2683(19990201)20:2<391::AID-ELPS391>3.0.CO;2-N
   Hampson R, 1997, J BIOL CHEM, V272, P28596, DOI 10.1074/jbc.272.45.28596
   Hickman MJ, 1999, P NATL ACAD SCI USA, V96, P10764, DOI 10.1073/pnas.96.19.10764
   Hofmann K, 1999, NUCLEIC ACIDS RES, V27, P215, DOI 10.1093/nar/27.1.215
   Iaccarino I, 1998, EMBO J, V17, P2677, DOI 10.1093/emboj/17.9.2677
   Kaina B, 1997, MUTAT RES-FUND MOL M, V381, P227, DOI 10.1016/S0027-5107(97)00187-5
   KURANAMI M, 1995, J SURG RES, V58, P233, DOI 10.1006/jsre.1995.1036
   LAKS MS, 1981, J BIOL CHEM, V256, P8775
   Li GM, 1996, J BIOL CHEM, V271, P24084, DOI 10.1074/jbc.271.39.24084
   LOWRY OH, 1951, J BIOL CHEM, V193, P265
   Matton N, 2000, J BIOL CHEM, V275, P17808, DOI 10.1074/jbc.M909794199
   Modrich P, 1996, ANNU REV BIOCHEM, V65, P101, DOI 10.1146/annurev.bi.65.070196.000533
   Ochs K, 2000, CANCER RES, V60, P5815
   PALOMBO F, 1995, SCIENCE, V268, P1912, DOI 10.1126/science.7604265
   Pinna L A, 1997, Prog Cell Cycle Res, V3, P77
   PRIGENT C, 1992, EMBO J, V11, P2925, DOI 10.1002/j.1460-2075.1992.tb05362.x
   Sakamoto Y, 1997, ONCOGENE, V15, P2001, DOI 10.1038/sj.onc.1201391
   Sayed M, 2000, J BIOL CHEM, V275, P16569, DOI 10.1074/jbc.M000312200
   Srivenugopal KS, 2000, CANCER RES, V60, P282
   STALTER G, 1994, BIOCHEM BIOPH RES CO, V202, P141, DOI 10.1006/bbrc.1994.1904
   Steplewski A, 2000, GENE, V246, P169, DOI 10.1016/S0378-1119(00)00077-9
   Umar A, 1996, EUR J BIOCHEM, V238, P297, DOI 10.1111/j.1432-1033.1996.0297z.x
   Wang HX, 1999, J BIOL CHEM, V274, P16894, DOI 10.1074/jbc.274.24.16894
   Wu JX, 1999, MOL CELL BIOL, V19, P8292
   Yacoub A, 1997, CANCER RES, V57, P5457
   Yamada M, 1997, NUCLEIC ACIDS RES, V25, P491, DOI 10.1093/nar/25.3.491
   Ye Y, 1996, EMBO J, V15, P5606, DOI 10.1002/j.1460-2075.1996.tb00945.x
NR 46
TC 52
Z9 56
U1 0
U2 2
PU OXFORD UNIV PRESS
PI OXFORD
PA GREAT CLARENDON ST, OXFORD OX2 6DP, ENGLAND
SN 0305-1048
J9 NUCLEIC ACIDS RES
JI Nucleic Acids Res.
PD MAY 1
PY 2002
VL 30
IS 9
BP 1959
EP 1966
DI 10.1093/nar/30.9.1959
PG 8
WC Biochemistry & Molecular Biology
WE Science Citation Index Expanded (SCI-EXPANDED)
SC Biochemistry & Molecular Biology
GA 551YG
UT WOS:000175591100012
PM 11972333
OA Green Published, Bronze
DA 2022-04-10
ER

PT J
AU Vassal, E
   Barette, C
   Fonrose, X
   Dupont, R
   Sans-Soleilhac, E
   Lafanechere, L
AF Vassal, Emilie
   Barette, Caroline
   Fonrose, Xavier
   Dupont, Raphael
   Sans-Soleilhac, Emmanuelle
   Lafanechere, Laurence
TI Miniaturization and validation of a sensitive multiparametric cell-based
   assay for the concomitant detection of microtubule-destabilizing and
   microtubule-stabilizing agents
SO JOURNAL OF BIOMOLECULAR SCREENING
LA English
DT Article
DE microtubules; tubulin post-translational modification; cell-based
   assay; anticancer drugs; high-content screening
ID TUBULIN-TYROSINE LIGASE; ADVANCED SOLID TUMORS; TOXOPLASMA-GONDII;
   ALPHA-TUBULIN; post-translational modification; CHEMOTHERAPEUTIC-AGENTS;
   DETYROSINATED TUBULIN; INTRAVENOUS-INFUSION; ANTICANCER DRUGS;
   NATURAL-PRODUCTS
AB The authors describe a cell-based assay for anti-microtubule compounds suitable for automation. This assay allows the identification, in a single screening campaign, of both microtubule-destabilizing and microtubule-stabilizing agents. Its rationale is based on the substrate properties of the tubulin-modifying enzymes involved in the tubulin tyrosination cycle. This cycle involves the removal of the C-terminal tyrosine of the tubulin alpha-subunit by an ill-defined tubulin carboxypeptidase and its readdition by tubulin tyrosine ligase. Because of the substrate properties of these enzymes, dynamic microtubules, sensitive to depolymerizing drugs, are composed of tyrosinated tubulin, whereas nondynarnic, stabilized microtubules are composed of detyrosinated tubulin. Thus depolymerization or stabilization of the microtubule network can easily be detected with double-immunofluorescence staining using antibodies specific to tyrosinated and detyrosinated tubulin. The authors have scaled this assay to the 96-well plate format and adapted its process for an automated handling, including a readout using a microplate reader. They describe the different steps of this adaptation. This assay was validated using known compounds. This new cell-based assay represents an alternative to both global cytotoxicity assays and in vitro tubulin assembly assays commonly used for the detection of microtubule poisons.
C1 Univ Grenoble 1, DRDC, U3669 CS, INSERM,CNRS,CEA Grenoble, F-38054 Grenoble 09, France.
   CEA, INSERM, U366, CS DRDC, Grenoble, France.
   Dept Biol Integree, Grenoble, France.
   CEA, INSERM, U366, CS DRDC, Grenoble, France.
RP Lafanechere, L (corresponding author), Univ Grenoble 1, DRDC, U3669 CS, INSERM,CNRS,CEA Grenoble, 17 Rue Martyrs, F-38054 Grenoble 09, France.
EM laurence.lafanechere@cea.fr
RI Lafanechère, Laurence MP/N-7474-2013
OI Lafanechère, Laurence MP/0000-0002-7902-7630; BARETTE,
   Caroline/0000-0003-0999-7751; Stermann, Emilie/0000-0002-8486-4935
CR ALFA CE, 1991, CELL MOTIL CYTOSKEL, V18, P86, DOI 10.1002/cm.970180203
   Andrieux A, 2003, M S-MED SCI, V19, P135, DOI 10.1051/medsci/2003192135
   Andrieux A, 2002, GENE DEV, V16, P2350, DOI 10.1101/gad.223302
   ARCE CA, 1978, J NEUROCHEM, V31, P205, DOI 10.1111/j.1471-4159.1978.tb12449.x
   ARCE CA, 1975, EUR J BIOCHEM, V59, P145, DOI 10.1111/j.1432-1033.1975.tb02435.x
   Badin-Larcon AC, 2004, P NATL ACAD SCI USA, V101, P5577, DOI 10.1073/pnas.0307917101
   BARRA HS, 1973, J NEUROCHEM, V20, P97, DOI 10.1111/j.1471-4159.1973.tb12108.x
   BARRA HS, 1988, MOL NEUROBIOL, V2, P133, DOI 10.1007/BF02935343
   Begley TJ, 2004, MOL CELL, V16, P117, DOI 10.1016/j.molcel.2004.09.005
   Bosc C, 1996, P NATL ACAD SCI USA, V93, P2125, DOI 10.1073/pnas.93.5.2125
   DAVIDSE LC, 1977, J CELL BIOL, V72, P174, DOI 10.1083/jcb.72.1.174
   DAXHELET GA, 1989, ANAL BIOCHEM, V179, P401, DOI 10.1016/0003-2697(89)90152-8
   DIMARCO A, 1981, CANCER TREAT REP, V65, P3
   Dohner K, 2005, CURR TOP MICROBIOL, V285, P67
   Estes R, 1998, ANTIMICROB AGENTS CH, V42, P2036, DOI 10.1128/AAC.42.8.2036
   Falconer M, 2002, J BIOMOL SCREEN, V7, P460, DOI 10.1177/108705702237678
   Fowler RE, 1998, PARASITOLOGY, V117, P425, DOI 10.1017/S003118209800328X
   Giannakakou P, 2000, P NATL ACAD SCI USA, V97, P2904, DOI 10.1073/pnas.040546297
   Giannakakou P, 2000, J NATL CANCER I, V92, P182, DOI 10.1093/jnci/92.3.182
   Gigant B, 2005, NATURE, V435, P519, DOI 10.1038/nature03566
   GUNDERSEN GG, 1987, J CELL BIOL, V105, P251, DOI 10.1083/jcb.105.1.251
   GUNDERSEN GG, 1984, CELL, V38, P779, DOI 10.1016/0092-8674(84)90273-3
   Gupta K, 2004, BIOCHEMISTRY-US, V43, P6645, DOI 10.1021/bi036112v
   Gupta S, 2003, MOL CELL BIOCHEM, V253, P41, DOI 10.1023/A:1026045100219
   Helft PR, 2004, CLIN CANCER RES, V10, P4363, DOI 10.1158/1078-0432.CCR-04-0088
   Henry MD, 2004, CANCER RES, V64, P7995, DOI 10.1158/0008-5472.CAN-04-1722
   Honore S, 2004, CANCER RES, V64, P4957, DOI 10.1158/0008-5472.CAN-04-0693
   Johnston PA, 2002, DRUG DISCOV TODAY, V7, P353, DOI 10.1016/S1359-6446(01)02140-7
   Jordan M. A., 2002, Current Medicinal Chemistry - Anti-Cancer Agents, V2, P1, DOI 10.2174/1568011023354290
   Jordan MA, 2004, NAT REV CANCER, V4, P253, DOI 10.1038/nrc1317
   KREIS TE, 1987, EMBO J, V6, P2597, DOI 10.1002/j.1460-2075.1987.tb02550.x
   Lafanechere L, 2000, NEUROCHEM RES, V25, P11, DOI 10.1023/A:1007575012904
   Landen JW, 2004, CLIN CANCER RES, V10, P5187, DOI 10.1158/1078-0432.CCR-04-0360
   LIEUVIN A, 1994, J CELL BIOL, V124, P985, DOI 10.1083/jcb.124.6.985
   MacRae TH, 1997, EUR J BIOCHEM, V244, P265, DOI 10.1111/j.1432-1033.1997.00265.x
   Mayer TU, 1999, SCIENCE, V286, P971, DOI 10.1126/science.286.5441.971
   Melo EJT, 2001, BIOCELL, V25, P53
   Monneret C, 2001, EUR J MED CHEM, V36, P483, DOI 10.1016/S0223-5234(01)01244-2
   Morrissette NS, 2002, J CELL SCI, V115, P1017
   NA GC, 1982, J BIOL CHEM, V257, P387
   NOBLE RL, 1990, BIOCHEM CELL BIOL, V68, P1344, DOI 10.1139/o90-197
   Panda D, 2005, P NATL ACAD SCI USA, V102, P9878, DOI 10.1073/pnas.0501821102
   PATURLELAFANECHERE L, 1994, J CELL SCI, V107, P1529
   Perez EA, 2005, INVEST NEW DRUG, V23, P257, DOI 10.1007/s10637-005-6735-y
   Perlman ZE, 2004, SCIENCE, V306, P1194, DOI 10.1126/science.1100709
   Peterson JR, 2002, CHEM BIOL, V9, P1275, DOI 10.1016/S1074-5521(02)00284-3
   PETTIT GR, 1989, EXPERIENTIA, V45, P209, DOI 10.1007/BF01954881
   PRESTON SF, 1979, J MOL EVOL, V13, P233, DOI 10.1007/BF01739482
   Roberge M, 2000, CANCER RES, V60, P5052
   Rodriguez A, 1996, J CELL BIOL, V134, P349, DOI 10.1083/jcb.134.2.349
   Ruthel G, 2005, J VIROL, V79, P4709, DOI 10.1128/JVI.79.8.4709-4719.2005
   SACKETT DL, 1993, PHARMACOL THERAPEUT, V59, P163, DOI 10.1016/0163-7258(93)90044-E
   Saoudi Y, 2004, EUR J BIOCHEM, V271, P3255, DOI 10.1111/j.1432-1033.2004.04259.x
   SASSE R, 1988, J CELL SCI, V90, P577
   SCHULZE E, 1987, J CELL BIOL, V105, P2167, DOI 10.1083/jcb.105.5.2167
   Shaw MK, 2000, J CELL SCI, V113, P1241
   Simmons TL, 2005, MOL CANCER THER, V4, P333
   Stachel SJ, 2001, CURR PHARM DESIGN, V7, P1277, DOI 10.2174/1381612013397410
   Tolcher AW, 2000, ANN ONCOL, V11, P333, DOI 10.1023/A:1008398725442
   Valiron O, 2001, CELL MOL LIFE SCI, V58, P2069, DOI 10.1007/PL00000837
   Wall ME, 1998, MED RES REV, V18, P299
   WANI MC, 1971, J AM CHEM SOC, V93, P2325, DOI 10.1021/ja00738a045
   Watts NR, 2000, J CELL BIOL, V150, P349, DOI 10.1083/jcb.150.2.349
   WEBSTER DR, 1987, J CELL BIOL, V105, P265, DOI 10.1083/jcb.105.1.265
   WEHLAND J, 1987, J CELL BIOL, V104, P1059, DOI 10.1083/jcb.104.4.1059
   WEHLAND J, 1987, J CELL SCI, V88, P185
   WEHLAND J, 1977, J MOL BIOL, V111, P329, DOI 10.1016/S0022-2836(77)80055-7
   Westermann S, 2003, NAT REV MOL CELL BIO, V4, P938, DOI 10.1038/nrm1260
   Wood Kenneth W., 2001, Current Opinion in Pharmacology, V1, P370, DOI 10.1016/S1471-4892(01)00064-9
   Ye KQ, 1998, P NATL ACAD SCI USA, V95, P1601, DOI 10.1073/pnas.95.4.1601
   Zhang B, 2005, P NATL ACAD SCI USA, V102, P227, DOI 10.1073/pnas.0406361102
   Zhang JH, 1999, J BIOMOL SCREEN, V4, P67, DOI 10.1177/108705719900400206
NR 72
TC 25
Z9 26
U1 0
U2 5
PU SAGE PUBLICATIONS INC
PI THOUSAND OAKS
PA 2455 TELLER RD, THOUSAND OAKS, CA 91320 USA
SN 1087-0571
EI 1552-454X
J9 J BIOMOL SCREEN
JI J. Biomol. Screen
PD JUN
PY 2006
VL 11
IS 4
BP 377
EP 389
DI 10.1177/1087057106286210
PG 13
WC Biochemical Research Methods; Biotechnology & Applied Microbiology;
   Chemistry, Analytical
WE Science Citation Index Expanded (SCI-EXPANDED)
SC Biochemistry & Molecular Biology; Biotechnology & Applied Microbiology;
   Chemistry
GA 054PL
UT WOS:000238391000005
PM 16751334
OA Bronze
DA 2022-04-10
ER

PT J
AU Gong, FD
   Miller, KM
AF Gong, Fade
   Miller, Kyle M.
TI Mammalian DNA repair: HATs and HDACs make their mark through histone
   acetylation
SO MUTATION RESEARCH-FUNDAMENTAL AND MOLECULAR mechanism OF MUTAGENESIS
LA English
DT Review
DE Chromatin; DNA repair; DNA damage response; Genome stability; Histone
   acetylation
ID NUCLEOTIDE EXCISION-REPAIR; DOUBLE-STRAND BREAKS; DAMAGE RESPONSE;
   CHROMATIN-STRUCTURE; post-translational modification; GENOMIC STABILITY;
   LYSINE 16; ACETYLTRANSFERASE; ACTIVATION; H2AX
AB Genetic information is recorded in specific DNA sequences that must be protected to preserve normal cellular function. Genome maintenance pathway have evolved to sense and repair DNA damage. Importantly, deleterious mutations that occur from mis-repaired lesions can lead to diseases such as cancer. As eukaryotic DNA is bound by histone proteins and organized into chromatin, the true in vivo substrate of transcription, replication and DNA repair is chromatin. Almost 50 years ago, it was found that histones contained the post-translational modification, acetylation. With the cloning and identification of transcription associated histone acetyltransferase (HAT) and histone deacetylase (HDAC) enzymes that write and erase the histone acetylation mark respectively, it was realized that this histone modification could be dynamically regulated. Chromatin is subjected to numerous PTMs that regulate chromatin structure and function, including DNA repair. As different organisms contain different histone modification, chromatin-associated proteins and chromatin states, it is likely that chromatin-templated processes such as DNA repair will exhibit organismal differences. This article focuses on the DNA damage response (DDR) in mammalian cells and how the concerted activities of HAT and HDAC enzymes, and their histone acetylation target, specifically participate in DNA double-strand break (DSB) repair. Defects in DNA repair and chromatin pathway are observed in cancer, and these pathway represent cancer therapeutic target. Therefore, understanding the relationship between DNA repair and histone acetylations is important for providing mechanistic details of DSB repair within chromatin that has the potential to be exploited in the clinic. (C) 2013 Elsevier B.V. All rights reserved.
C1 [Gong, Fade; Miller, Kyle M.] Univ Texas Austin, Inst Mol & Cellular Biol, Sect Mol Genet & Microbiol, Austin, TX 78712 USA.
RP Miller, KM (corresponding author), Univ Texas Austin, Inst Mol & Cellular Biol, Sect Mol Genet & Microbiol, 2506 Speedway Stop A5000, Austin, TX 78712 USA.
EM kyle.miller@austin.utexas.edu
RI Gong, Fade/M-1585-2015
OI Miller, Kyle/0000-0002-4544-0013
FU Cancer Prevention Research Institute of Texas (CPRIT)
FX The Miller laboratory is in part supported by the Cancer Prevention
   Research Institute of Texas (CPRIT). Dr. Kyle Miller is a CPRIT scholar.
CR Alabert C, 2012, NAT REV MOL CELL BIO, V13, P153, DOI 10.1038/nrm3288
   ALLFREY VG, 1964, P NATL ACAD SCI USA, V51, P786, DOI 10.1073/pnas.51.5.786
   Bannister AJ, 2001, NATURE, V410, P120, DOI 10.1038/35065138
   Barbieri I, 2013, BRIEF FUNCT GENOMICS, V12, P219, DOI 10.1093/bfgp/elt007
   Basile V, 2006, J BIOL CHEM, V281, P2347, DOI 10.1074/jbc.M507712200
   Battu A, 2011, NUCLEIC ACIDS RES, V39, P7931, DOI 10.1093/nar/gkr523
   Beucher A, 2009, EMBO J, V28, P3413, DOI 10.1038/emboj.2009.276
   Bhaskara S, 2010, CANCER CELL, V18, P436, DOI 10.1016/j.ccr.2010.10.022
   Bonner WM, 2008, NAT REV CANCER, V8, P957, DOI 10.1038/nrc2523
   Brownell JE, 1996, CELL, V84, P843, DOI 10.1016/S0092-8674(00)81063-6
   Buchmann AM, 2004, MOL CELL BIOL, V24, P5332, DOI 10.1128/MCB.24.12.5332-5339.2004
   Campos EI, 2009, ANNU REV GENET, V43, P559, DOI 10.1146/annurev.genet.032608.103928
   Chapman JR, 2012, MOL CELL, V47, P497, DOI 10.1016/j.molcel.2012.07.029
   Chen WT, 2013, MOL CELL BIOL, V33, P111, DOI 10.1128/MCB.01024-12
   Ciccia A, 2010, MOL CELL, V40, P179, DOI 10.1016/j.molcel.2010.09.019
   Cotta-Ramusino C, 2011, SCIENCE, V332, P1313, DOI 10.1126/science.1203430
   Dang WW, 2009, NATURE, V459, P802, DOI 10.1038/nature08085
   Das C, 2009, NATURE, V459, P113, DOI 10.1038/nature07861
   Dawson MA, 2012, NEW ENGL J MED, V367, P647, DOI 10.1056/NEJMra1112635
   Di Cerbo V, 2013, BRIEF FUNCT GENOMICS, V12, P231, DOI 10.1093/bfgp/els065
   Dovey OM, 2013, BLOOD, V121, P1335, DOI 10.1182/blood-2012-07-441949
   Doyon Y, 2004, MOL CELL BIOL, V24, P1884, DOI 10.1128/MCB.24.5.1884-1896.2004
   Feldman JL, 2012, J BIOL CHEM, V287, P42419, DOI 10.1074/jbc.R112.378877
   Floyd SR, 2013, NATURE, V498, P246, DOI 10.1038/nature12147
   Gospodinov A, 2013, MUTAT RES-REV MUTAT, V752, P45, DOI 10.1016/j.mrrev.2012.10.001
   Grewal SIS, 2007, NAT REV GENET, V8, P35, DOI 10.1038/nrg2008
   Groselj B, 2013, BRIT J CANCER, V108, P748, DOI 10.1038/bjc.2013.21
   Guo RF, 2011, NUCLEIC ACIDS RES, V39, P1390, DOI 10.1093/nar/gkq983
   Gupta A, 2005, MOL CELL BIOL, V25, P5292, DOI 10.1128/MCB.25.12.5292-5305.2005
   Hsiao KY, 2013, J MOL CELL BIOL, V5, P157, DOI 10.1093/jmcb/mjs066
   Huertas P, 2010, NAT STRUCT MOL BIOL, V17, P11, DOI 10.1038/nsmb.1710
   Iacovoni JS, 2010, EMBO J, V29, P1446, DOI 10.1038/emboj.2010.38
   Ikura T, 2000, CELL, V102, P463, DOI 10.1016/S0092-8674(00)00051-9
   Ikura T, 2007, MOL CELL BIOL, V27, P7028, DOI 10.1128/MCB.00579-07
   Jackson SP, 2009, NATURE, V461, P1071, DOI 10.1038/nature08467
   Jang ER, 2011, FEBS LETT, V585, P47, DOI 10.1016/j.febslet.2010.11.034
   Jha S, 2008, MOL CELL BIOL, V28, P2690, DOI 10.1128/MCB.01983-07
   Jiang XF, 2010, FEBS LETT, V584, P2926, DOI 10.1016/j.febslet.2010.05.017
   Kaidi A, 2013, NATURE, V498, DOI 10.1038/nature12201
   Kaidi A, 2010, SCIENCE, V329, P1348, DOI 10.1126/science.1192049
   Kao GD, 2003, J CELL BIOL, V160, P1017, DOI 10.1083/jcb.200209065
   Kim MK, 2009, PLOS ONE, V4, DOI 10.1371/journal.pone.0004864
   Kim YC, 2009, NAT CELL BIOL, V11, P92, DOI 10.1038/ncb1817
   KORNBERG RD, 1974, SCIENCE, V184, P868, DOI 10.1126/science.184.4139.868
   Kotian S, 2011, J BIOL CHEM, V286, P7722, DOI 10.1074/jbc.C110.194233
   Kouzarides T, 2007, CELL, V128, P693, DOI 10.1016/j.cell.2007.02.005
   Lebel EA, 2010, MOL CELL BIOCHEM, V339, P271, DOI 10.1007/s11010-010-0390-0
   Lee HS, 2010, EMBO J, V29, P1434, DOI 10.1038/emboj.2010.27
   Lee KK, 2007, NAT REV MOL CELL BIO, V8, P284, DOI 10.1038/nrm2145
   Li XZ, 2010, MOL CELL BIOL, V30, P5335, DOI 10.1128/MCB.00350-10
   Lieber MR, 2010, ANNU REV BIOCHEM, V79, P181, DOI 10.1146/annurev.biochem.052308.093131
   Love IM, 2012, CELL CYCLE, V11, P2458, DOI 10.4161/cc.20864
   Margueron R, 2010, NAT REV GENET, V11, P285, DOI 10.1038/nrg2752
   McCord RA, 2009, AGING-US, V1, P109, DOI 10.18632/aging.100011
   Miller KM, 2012, BIOCHEM SOC T, V40, P370, DOI 10.1042/BST20110747
   Miller KM, 2010, NAT STRUCT MOL BIOL, V17, P1144, DOI 10.1038/nsmb.1899
   Mostoslavsky R, 2006, CELL, V124, P315, DOI [10.1016/j.cell.2005.11.044, 10.1016/J.CEL.2005.11.044]
   Murr R, 2006, NAT CELL BIOL, V8, P91, DOI 10.1038/ncb1343
   Musselman CA, 2012, NAT STRUCT MOL BIOL, V19, P1218, DOI 10.1038/nsmb.2436
   O'Hagan HM, 2008, PLOS GENET, V4, DOI 10.1371/journal.pgen.1000155
   O'Sullivan RJ, 2010, NAT STRUCT MOL BIOL, V17, P1218, DOI 10.1038/nsmb.1897
   Oberdoerffer P, 2008, CELL, V135, P907, DOI 10.1016/j.cell.2008.10.025
   Ogiwara H, 2011, ONCOGENE, V30, P2135, DOI [10.1038/onc.2010.592, 10.1038/onc.2010.592;]
   Price BD, 2013, CELL, V152, P1344, DOI 10.1016/j.cell.2013.02.011
   Qian MX, 2013, CELL, V153, P1012, DOI 10.1016/j.cell.2013.04.032
   RAMANATHAN B, 1989, J BIOL CHEM, V264, P11026
   RAMANATHAN B, 1986, CARCINOGENESIS, V7, P1087, DOI 10.1093/carcin/7.7.1087
   Rogakou EP, 1998, J BIOL CHEM, V273, P5858, DOI 10.1074/jbc.273.10.5858
   Rossetto D, 2010, CLIN CANCER RES, V16, P4543, DOI 10.1158/1078-0432.CCR-10-0513
   Rubbi CP, 2003, EMBO J, V22, P975, DOI 10.1093/emboj/cdg082
   Ruthenburg AJ, 2007, NAT REV MOL CELL BIO, V8, P983, DOI 10.1038/nrm2298
   Shahbazian MD, 2007, ANNU REV BIOCHEM, V76, P75, DOI 10.1146/annurev.biochem.76.052705.162114
   Sharma GG, 2010, MOL CELL BIOL, V30, P3582, DOI 10.1128/MCB.01476-09
   Shogren-Knaak M, 2006, SCIENCE, V311, P844, DOI 10.1126/science.1124000
   Sirbu BM, 2011, GENE DEV, V25, P1320, DOI 10.1101/gad.2053211
   Smerdon MJ, 1991, CURR OPIN CELL BIOL, V3, P422, DOI 10.1016/0955-0674(91)90069-B
   Soria G, 2012, MOL CELL, V46, P722, DOI 10.1016/j.molcel.2012.06.002
   Suganuma T, 2011, ANNU REV BIOCHEM, V80, P473, DOI 10.1146/annurev-biochem-061809-175347
   Sun YL, 2010, CELL CYCLE, V9, P930, DOI 10.4161/cc.9.5.10931
   Sun YL, 2009, NAT CELL BIOL, V11, P1376, DOI 10.1038/ncb1982
   Sun YL, 2005, P NATL ACAD SCI USA, V102, P13182, DOI 10.1073/pnas.0504211102
   Tang JB, 2013, NAT STRUCT MOL BIOL, V20, P317, DOI 10.1038/nsmb.2499
   Taunton J, 1996, SCIENCE, V272, P408, DOI 10.1126/science.272.5260.408
   Tillhon M, 2012, DNA REPAIR, V11, P844, DOI 10.1016/j.dnarep.2012.08.001
   Tjeertes JV, 2009, EMBO J, V28, P1878, DOI 10.1038/emboj.2009.119
   Vempati RK, 2010, J BIOL CHEM, V285, P28553, DOI 10.1074/jbc.M110.149393
   Vousden KH, 2009, CELL, V137, P413, DOI 10.1016/j.cell.2009.04.037
   Wang RH, 2008, CANCER CELL, V14, P312, DOI 10.1016/j.ccr.2008.09.001
   Wang ZB, 2009, CELL, V138, P1019, DOI 10.1016/j.cell.2009.06.049
   Waterborg JH, 2002, BIOCHEM CELL BIOL, V80, P363, DOI 10.1139/O02-080
   Wyrick JJ, 2009, BBA-GENE REGUL MECH, V1789, P37, DOI 10.1016/j.bbagrm.2008.07.001
   Xie AY, 2010, CELL CYCLE, V9, P3602, DOI 10.4161/cc.9.17.12884
   Xu Y, 2012, MOL CELL, V48, P723, DOI 10.1016/j.molcel.2012.09.026
   Xu Y, 2011, CELL CYCLE, V10, P261, DOI 10.4161/cc.10.2.14543
   Xu Y, 2010, J CELL BIOL, V191, P31, DOI 10.1083/jcb.201001160
   Yamagata K, 2009, BIOCHEM BIOPH RES CO, V390, P1355, DOI 10.1016/j.bbrc.2009.10.156
   Yang XJ, 2008, NAT REV MOL CELL BIO, V9, P206, DOI 10.1038/nrm2346
   Zhang ZH, 2011, NAT CHEM BIOL, V7, P58, DOI 10.1038/NCHEMBIO.495
NR 98
TC 115
Z9 118
U1 0
U2 28
PU ELSEVIER
PI AMSTERDAM
PA RADARWEG 29, 1043 NX AMSTERDAM, NETHERLANDS
SN 1386-1964
EI 1873-135X
J9 MUTAT RES-FUND MOL M
JI Mutat. Res.-Fundam. Mol. Mech. Mutagen.
PD OCT
PY 2013
VL 750
IS 1-2
SI SI
BP 23
EP 30
DI 10.1016/j.mrfmmm.2013.07.002
PG 8
WC Biotechnology & Applied Microbiology; Genetics & Heredity; Toxicology
WE Science Citation Index Expanded (SCI-EXPANDED)
SC Biotechnology & Applied Microbiology; Genetics & Heredity; Toxicology
GA 260FV
UT WOS:000327581300004
PM 23927873
DA 2022-04-10
ER

PT J
AU Zecchin, A
   Pattarini, L
   Gutierrez, MI
   Mano, M
   Mai, A
   Valente, S
   Myers, MP
   Pantano, S
   Giacca, M
AF Zecchin, Annalisa
   Pattarini, Lucia
   Gutierrez, Maria Ines
   Mano, Miguel
   Mai, Antonello
   Valente, Sergio
   Myers, Mike P.
   Pantano, Sergio
   Giacca, Mauro
TI Reversible acetylation regulates vascular endothelial growth factor
   receptor-2 activity
SO JOURNAL OF MOLECULAR CELL BIOLOGY
LA English
DT Article
DE acetylation; angiogenesis; p300; phosphorylation; vascular endothelial
   growth factor
ID HISTONE DEACETYLASE inhibitor; TARGETING TUMOR ANGIOGENESIS; LYSINE
   ACETYLATION; signal transduction; KINASE-ACTIVITY; SELECTIVE inhibitor;
   CELL-MIGRATION; P300; P53; INTERNALIZATION
AB The tyrosine kinase receptor vascular endothelial growth factor receptor 2 (VEGFR2) is a key regulator of angiogenesis. Here we show that VEGFR2 is acetylated in endothelial cells both at four lysine residues forming a dense cluster in the kinase insert domain and at a single lysine located in the receptor activation loop. These modifications are under dynamic control of the acetyltransferase p300 and two deacetylases HDAC5 and HDAC6. We demonstrate that VEGFR2 acetylation essentially regulates receptor phosphorylation. In particular, VEGFR2 acetylation significantly alters the kinetics of receptor phosphorylation after ligand binding, allowing receptor phosphorylation and intracellular signaling upon prolonged stimulation with VEGF. Molecular dynamics simulations indicate that acetylation of the lysine in the activation loop contributes to the transition to an open active state, in which tyrosine phosphorylation is favored by better exposure of the kinase target residues. These findings indicate that post-translational modificationbyacetylation is a critical mechanism that directly affects VEGFR2 function.
C1 [Zecchin, Annalisa; Pattarini, Lucia; Gutierrez, Maria Ines; Mano, Miguel; Giacca, Mauro] Int Ctr Genet Engn & Biotechnol, Mol Med Lab, I-34012 Trieste, Italy.
   [Mai, Antonello; Valente, Sergio] Univ Roma La Sapienza, Dipartimento Chim & Tecnol Farmaco, Ist Pasteur, Fdn Cenci Bolognetti, I-00185 Rome, Italy.
   [Myers, Mike P.] Int Ctr Genet Engn & Biotechnol, Prot Networks Lab, I-34012 Trieste, Italy.
   [Pantano, Sergio] Inst Pasteur Montevideo, Biomol Simulat Grp, Montevideo, Uruguay.
RP Giacca, M (corresponding author), Int Ctr Genet Engn & Biotechnol, Mol Med Lab, Padriciano 99, I-34012 Trieste, Italy.
EM giacca@icgeb.org
RI Valente, Sergio/K-2198-2016; Mai, Antonello/AAC-2144-2019; Giacca,
   Mauro/J-9287-2016; Mano, Miguel/A-4462-2013
OI Valente, Sergio/0000-0002-2241-607X; Giacca, Mauro/0000-0003-2927-7225;
   Mano, Miguel/0000-0003-1922-4824; Pantano, Sergio/0000-0001-6435-4543;
   Mai, Antonello/0000-0001-9176-2382
FU European Research Council (ERC)European Research Council (ERC)
   [20090506]; project FIRBMinistry of Education, Universities and Research
   (MIUR)Fund for Investment in Basic Research (FIRB) [RBAP11Z4Z9,
   RBFR10ZJQT]; project PRINMinistry of Education, Universities and
   Research (MIUR) [2009PX2T2E]; FP7 Project [BLUEPRINT/282510]; MERCOSUR
   Structural Convergence Fund (FOCEM) [COF 03/11]
FX This work was supported by Advanced Grant 20090506 from the European
   Research Council (ERC) and project FIRB RBAP11Z4Z9 to M. G., projects
   PRIN 2009PX2T2E, FIRB RBFR10ZJQT, and FP7 Project BLUEPRINT/282510 to A.
   M., and MERCOSUR Structural Convergence Fund (FOCEM) COF 03/11 to S.P.
CR Adams RH, 2007, NAT REV MOL CELL BIO, V8, P464, DOI 10.1038/nrm2183
   Arif M, 2007, J PHYS CHEM B, V111, P11877, DOI 10.1021/jp0762931
   Carmeliet P, 2011, NATURE, V473, P298, DOI 10.1038/nature10144
   Caron C, 2005, BIOESSAYS, V27, P408, DOI 10.1002/bies.20210
   Cereseto A, 2005, EMBO J, V24, P3070, DOI 10.1038/sj.emboj.7600770
   Choudhary C, 2009, SCIENCE, V325, P834, DOI 10.1126/science.1175371
   Deroanne CF, 2002, ONCOGENE, V21, P427, DOI 10.1038/sj.onc.1205108
   Ding G, 2013, FEBS LETT, V587, P880, DOI 10.1016/j.febslet.2013.02.001
   Dougher M, 1999, ONCOGENE, V18, P1619, DOI 10.1038/sj.onc.1202478
   Ellis L, 2009, CANCER LETT, V280, P145, DOI 10.1016/j.canlet.2008.11.012
   Giacca M, 2010, TRANSCR-AUSTIN, V1, P149, DOI 10.4161/trns.1.3.13229
   Goh LK, 2010, J CELL BIOL, V189, P871, DOI 10.1083/jcb.201001008
   Han Y, 2009, BIOCHEM BIOPH RES CO, V383, P88, DOI 10.1016/j.bbrc.2009.03.147
   Hasegawa M, 2007, J MED CHEM, V50, P4453, DOI 10.1021/jm0611051
   Hu ED, 2003, J PHARMACOL EXP THER, V307, P720, DOI 10.1124/jpet.103.055541
   Ito A, 2001, EMBO J, V20, P1331, DOI 10.1093/emboj/20.6.1331
   Kaluza D, 2011, EMBO J, V30, P4142, DOI 10.1038/emboj.2011.298
   Kawaguchi Y, 2006, J BIOL CHEM, V281, P1394, DOI 10.1074/jbc.M505772200
   Koch S, 2011, BIOCHEM J, V437, P169, DOI 10.1042/BJ20110301
   Kwon HJ, 2002, INT J CANCER, V97, P290, DOI 10.1002/ijc.1602
   Lampugnani MG, 2006, J CELL BIOL, V174, P593, DOI 10.1083/jcb.200602080
   Lanahan AA, 2010, DEV CELL, V18, P713, DOI 10.1016/j.devcel.2010.02.016
   Lau OD, 2000, MOL CELL, V5, P589, DOI 10.1016/S1097-2765(00)80452-9
   Lee KK, 2007, NAT REV MOL CELL BIO, V8, P284, DOI 10.1038/nrm2145
   Liu YJ, 2012, J BIOL CHEM, V287, P29168, DOI 10.1074/jbc.M112.371120
   LONCHARICH RJ, 1992, BIOPOLYMERS, V32, P523, DOI 10.1002/bip.360320508
   Lundby A, 2012, CELL REP, V2, P419, DOI 10.1016/j.celrep.2012.07.006
   Mai A, 2003, J MED CHEM, V46, P4826, DOI 10.1021/jm034167p
   Mateo F, 2009, NUCLEIC ACIDS RES, V37, P7072, DOI 10.1093/nar/gkp777
   Matsumoto T, 2005, EMBO J, V24, P2342, DOI 10.1038/sj.emboj.7600709
   Meyer RD, 2006, J BIOL CHEM, V281, P867, DOI 10.1074/jbc.M506454200
   Nakamura Y, 2008, CIRC RES, V102, P1182, DOI 10.1161/CIRCRESAHA.107.167080
   Oguro Y, 2010, BIOORGAN MED CHEM, V18, P7260, DOI 10.1016/j.bmc.2010.08.017
   Olsson AK, 2006, NAT REV MOL CELL BIO, V7, P359, DOI 10.1038/nrm1911
   Pillai S, 2010, CANCER RES, V70, P4931, DOI 10.1158/0008-5472.CAN-10-0501
   Pillai VB, 2011, MOL CELL BIOL, V31, P2349, DOI 10.1128/MCB.01205-10
   Qian DZ, 2004, CANCER RES, V64, P6626, DOI 10.1158/0008-5472.CAN-04-0540
   Qian DZ, 2006, CLIN CANCER RES, V12, P634, DOI 10.1158/1078-0432.CCR-05-1132
   Qiu TZ, 2013, FUTURE ONCOL, V9, P255, DOI [10.2217/FON.12.173, 10.2217/fon.12.173]
   Sabo A, 2008, MOL CELL BIOL, V28, P2201, DOI 10.1128/MCB.01557-07
   Sakurai Y, 2005, P NATL ACAD SCI USA, V102, P1076, DOI 10.1073/pnas.0404984102
   Seo HW, 2009, FEBS LETT, V583, P55, DOI 10.1016/j.febslet.2008.11.044
   Shaik S, 2012, J EXP MED, V209, P1289, DOI 10.1084/jem.20112446
   Shi DD, 2009, P NATL ACAD SCI USA, V106, P16275, DOI 10.1073/pnas.0904305106
   Song H, 2011, BIOCHEM BIOPH RES CO, V404, P68, DOI 10.1016/j.bbrc.2010.11.064
   Sundaresan NR, 2011, SCI SIGNAL, V4, DOI 10.1126/scisignal.2001465
   Takahashi T, 1997, ONCOGENE, V14, P2079, DOI 10.1038/sj.onc.1201047
   Tang XL, 2007, CELL, V131, P93, DOI 10.1016/j.cell.2007.07.034
   Thurn KT, 2011, FUTURE ONCOL, V7, P263, DOI [10.2217/fon.11.2, 10.2217/FON.11.2]
   Tsui V, 2001, BIOPOLYMERS, V56, P275, DOI 10.1002/1097-0282(2000)56:4<275::AID-BIP10024>3.0.CO;2-E
   Urbich C, 2009, BLOOD, V113, P5669, DOI 10.1182/blood-2009-01-196485
   WALTENBERGER J, 1994, J BIOL CHEM, V269, P26988
   Wang SS, 2008, P NATL ACAD SCI USA, V105, P7738, DOI 10.1073/pnas.0802857105
   Xiong Y, 2012, J CELL BIOL, V198, P155, DOI 10.1083/jcb.201202056
   Yang XJ, 2008, MOL CELL, V31, P449, DOI 10.1016/j.molcel.2008.07.002
   Yang XJ, 2008, NAT REV MOL CELL BIO, V9, P206, DOI 10.1038/nrm2346
   Zhang XH, 2007, MOL CELL, V27, P197, DOI 10.1016/j.molcel.2007.05.033
   Zhao SM, 2010, SCIENCE, V327, P1000, DOI 10.1126/science.1179689
NR 58
TC 20
Z9 21
U1 1
U2 7
PU OXFORD UNIV PRESS
PI OXFORD
PA GREAT CLARENDON ST, OXFORD OX2 6DP, ENGLAND
SN 1674-2788
EI 1759-4685
J9 J MOL CELL BIOL
JI J. Mol. Cell Biol.
PD APR
PY 2014
VL 6
IS 2
BP 116
EP 127
DI 10.1093/jmcb/mju010
PG 12
WC Cell Biology
WE Science Citation Index Expanded (SCI-EXPANDED)
SC Cell Biology
GA AH4EZ
UT WOS:000336081100003
PM 24620033
OA Bronze
DA 2022-04-10
ER

PT J
AU Coimbra, JRM
   Salvador, JAR
AF Coimbra, Judite R. M.
   Salvador, Jorge A. R.
TI A patent review of glutaminyl cyclase inhibitor (2004-present)
SO EXPERT OPINION ON THERAPEUTIC PATENTS
LA English
DT Review
DE Alzheimer's disease (AD); cancer; inflammation; glutaminyl cyclase (QC);
   glutaminyl cyclase isoform (isoQC); pyroglutamate residue (pE);
   small-molecule inhibitor
ID PYROGLUTAMATE-A-BETA; ALZHEIMERS-DISEASE; PORPHYROMONAS-GINGIVALIS;
   IMIDAZOLE DERIVATIVES; COGNITIVE DECLINE; PROTEIN; QPCT; EXPRESSION;
   TARGET; IDENTIFICATION
AB Introduction: Glutaminyl cyclase (QC) enzymes catalyze the post-translational processing of several substrates with N-terminal glutamine or glutamate to form pyroglutamate (pE) residue. In addition to physiological functions, emerging evidence demonstrates that human QCs play a part in pathological processes in diverse diseases such as Alzheimer's disease (AD), inflammatory and cancer diseases. Areas covered: In recent years, efforts to effectively develop QC small-molecule inhibitor have been made and different chemical classes have been disclosed. This review summarizes the patents/applications regarding QC inhibitor released from 2004 (first patent) to now. The patents are mostly described in terms of chemical structures, biochemical/pharmacological activities, and potential clinical applications. Expert opinion: For more than 15 years of research, the knowledge on the QC activity domain has considerably increased and therapeutic potential of QC inhibitor has been explored. An important number of studies and patents have been published to expand the use of QC inhibitor. QC enzymes are pharmacologically interesting target to be used as an AD-modifying therapy, or for other QC-associated disorder. Distinct classes of chemical scaffolds and potential clinical uses have been claimed by various organizations. For the coming years, there is much to experience in the QC field.
C1 [Coimbra, Judite R. M.; Salvador, Jorge A. R.] Univ Coimbra, Fac Pharm, Lab Pharmaceut Chem, P-3000548 Coimbra, Portugal.
   [Coimbra, Judite R. M.; Salvador, Jorge A. R.] Univ Coimbra, Ctr Neurosci & Cell Biol CNC, Ctr Innovat Biomed & Biotechnol CIBB, Coimbra, Portugal.
RP Salvador, JAR (corresponding author), Univ Coimbra, Fac Pharm, Lab Pharmaceut Chem, P-3000548 Coimbra, Portugal.
EM salvador@ci.uc.pt
RI SALVADOR, JORGE A. R./N-7174-2017
OI SALVADOR, JORGE A. R./0000-0003-0779-6083; Coimbra,
   Judite/0000-0001-5913-3834
FU European Regional Development Fund (ERDF), through the Centro 2020
   Regional Operational Programme [CENTRO-01-0247-FEDER-003269]; Portuguese
   Foundation for Science and Technology (FCT)Portuguese Foundation for
   Science and Technology [UIDB/04539/2020]; FCTPortuguese Foundation for
   Science and TechnologyEuropean Commission [SFRH/BD/138460/2018];
   University of Coimbra; European Regional Development Fund (ERDF),
   through COMPETE 2020 Operational Programme for Competitiveness and
   Internationalization
FX This work was supported by European Regional Development Fund (ERDF),
   through the Centro 2020 Regional Operational Programme under the project
   CENTRO-01-0247-FEDER-003269 (Drugs2CAD) and through COMPETE 2020
   Operational Programme for Competitiveness and Internationalization and
   Portuguese national funds via Portuguese Foundation for Science and
   Technology (FCT), under the project UIDB/04539/2020. The authors are
   grate-ful to University of Coimbra and Judite R.M. Coimbra thanks FCT
   for funding the individual PhD grant SFRH/BD/138460/2018.
CR Academisch Ziekenhuis Leiden, 2019, Patent, Patent No. [WO2019022600A1, 2019022600]
   Alexandru A, 2011, J NEUROSCI, V31, P12790, DOI 10.1523/JNEUROSCI.1794-11.2011
   [Anonymous], 2020, VIVORYON RECEIVES IN
   [Anonymous], 2020, VIVORYON THERAPEUTIC
   [Anonymous], 2020, VIV THER ANN UPD PHA
   [Anonymous], 2020, EUR PHAS 2B ALZH DIS
   Barclay AN, 2014, ANNU REV IMMUNOL, V32, P25, DOI 10.1146/annurev-immunol-032713-120142
   Becker A, 2016, BIOL CHEM, V397, P45, DOI 10.1515/hsz-2015-0192
   Becker A, 2013, BMC NEUROSCI, V14, DOI 10.1186/1471-2202-14-108
   Bender P, 2019, ARCH ORAL BIOL, V97, P223, DOI 10.1016/j.archoralbio.2018.10.022
   BOCKERS TM, 1995, J NEUROENDOCRINOL, V7, P445, DOI 10.1111/j.1365-2826.1995.tb00780.x
   Bridel C, 2017, ALZHEIMERS RES THER, V9, DOI 10.1186/s13195-017-0266-6
   Briels CT, 2020, CLIN NEUROPHYSIOL, V131, P88, DOI 10.1016/j.clinph.2019.09.014
   Buchholz M, 2006, J MED CHEM, V49, P664, DOI 10.1021/jm050756e
   Buchholz M, 2009, J MED CHEM, V52, P7069, DOI 10.1021/jm900969p
   Burgess TL, 2020, PLOS ONE, V15, DOI 10.1371/journal.pone.0226661
   Chen YL, 2012, BIOCHEM J, V442, P403, DOI 10.1042/BJ20110535
   Coimbra JRM, 2019, FUTURE MED CHEM, V11, P3179, DOI 10.4155/fmc-2019-0163
   Cynis H, 2008, BIOCHEMISTRY-US, V47, P7405, DOI 10.1021/bi800250p
   Cynis H, 2008, J MOL BIOL, V379, P966, DOI 10.1016/j.jmb.2008.03.078
   Cynis H, 2006, BBA-PROTEINS PROTEOM, V1764, P1618, DOI 10.1016/j.bbapap.2006.08.003
   Cynis H, 2013, INT J EXP PATHOL, V94, P217, DOI 10.1111/iep.12020
   Cynis H, 2011, EMBO MOL MED, V3, P545, DOI 10.1002/emmm.201100158
   De Kimpe L, 2012, PLOS ONE, V7, DOI 10.1371/journal.pone.0044674
   de Molon RS, 2019, INT J MOL SCI, V20, DOI 10.3390/ijms20184541
   Dileep KV, 2021, INT J BIOL MACROMOL, V170, P415, DOI 10.1016/j.ijbiomac.2020.12.118
   Dominy SS, 2019, SCI ADV, V5, DOI 10.1126/sciadv.aau3333
   Ezura Y, 2004, J BONE MINER RES, V19, P1296, DOI 10.1359/JBMR.040324
   FISCHER WH, 1987, P NATL ACAD SCI USA, V84, P3628, DOI 10.1073/pnas.84.11.3628
   Fraunhofer-Gesellschaft, 2018, Patent, Patent No. [WO2018100159A1, 2018100159]
   Fraunhofer-Gesellschaft assignee, 2019, Patent, Patent No. [WO2019162458A1, 2019162458]
   Frost JL, 2013, AM J PATHOL, V183, P369, DOI 10.1016/j.ajpath.2013.05.005
   Gillis JS, 2006, J TRANSL MED, V4, DOI 10.1186/1479-5876-4-27
   GONG JH, 1995, J EXP MED, V181, P631, DOI 10.1084/jem.181.2.631
   GOREN HJ, 1977, MOL PHARMACOL, V13, P606
   Harigaya Y, 2000, BIOCHEM BIOPH RES CO, V276, P422, DOI 10.1006/bbrc.2000.3490
   Hartlage-Rubsamen M, 2018, MOLECULES, V23, DOI 10.3390/molecules23040924
   Hartlage-Rubsamen M, 2015, ACTA NEUROPATHOL, V129, P565, DOI 10.1007/s00401-015-1395-2
   Hatherley D, 2008, MOL CELL, V31, P266, DOI 10.1016/j.molcel.2008.05.026
   Hawdon A., 2021, ALZHEIMERS DEMENT, V7
   Hellvard A, 2013, J INFECT DIS, V207, P768, DOI 10.1093/infdis/jis729
   Hennekens CH, 2015, EXPERT REV NEUROTHER, V15, P1245, DOI 10.1586/14737175.2015.1088784
   Hielscher-Michael S, 2016, MAR DRUGS, V14, DOI 10.3390/md14110203
   Hoffmann T, 2017, J PHARMACOL EXP THER, V362, P119, DOI 10.1124/jpet.117.240614
   Huang KF, 2008, BIOCHEM J, V411, P181, DOI 10.1042/BJ20071073
   Huang KF, 2005, P NATL ACAD SCI USA, V102, P13117, DOI 10.1073/pnas.0504184102
   Jawhar S, 2011, J BIOL CHEM, V286, P4454, DOI 10.1074/jbc.M110.185819
   Jimenez-Sanchez M, 2015, NAT CHEM BIOL, V11, P347, DOI [10.1038/NCHEMBIO.1790, 10.1038/nchembio.1790]
   Kanemitsu N, 2021, N-S ARCH PHARMACOL, V394, P751, DOI 10.1007/s00210-020-02013-x
   Kehlen A, 2017, BIOSCIENCE REP, V37, DOI 10.1042/BSR20170712
   Kehlen A, 2013, ENDOCR-RELAT CANCER, V20, P79, DOI 10.1530/ERC-12-0053
   Leibniz-Institut f?r Pflanzenbiochemie; Hochschule Anhalt,, 2017, Patent, Patent No. [WO 2017046256A1, 2017046256]
   Li MM, 2017, J MED CHEM, V60, P6664, DOI 10.1021/acs.jmedchem.7b00648
   Li MM, 2016, BIOORGAN MED CHEM, V24, P2280, DOI 10.1016/j.bmc.2016.03.064
   Logtenberg MEW, 2019, NAT MED, V25, P612, DOI 10.1038/s41591-019-0356-z
   Luccarini I, 2015, NEUROBIOL AGING, V36, P648, DOI 10.1016/j.neurobiolaging.2014.08.029
   Lues Inge, 2015, Alzheimers Dement (N Y), V1, P182, DOI 10.1016/j.trci.2015.08.002
   McLean C, 2020, J NEUROCHEM, V00, P1
   Medifron DBT Co. Ltd., 2018, Patent, Patent No. [KR101909089B1, 101909089]
   Mei F, 2020, PATHOGENS, V9, DOI 10.3390/pathogens9110944
   Meyer A., 2011, [No title captured], Patent No. [WO 2011/029920, 2011029920]
   Mintun MA, 2021, NEW ENGL J MED, V384, P1691, DOI 10.1056/NEJMoa2100708
   Morawski M, 2014, J ALZHEIMERS DIS, V39, P385, DOI 10.3233/JAD-131535
   Moro ML, 2018, ACTA NEUROPATHOL COM, V6, DOI 10.1186/s40478-017-0505-x
   National Health Research Institutes, 2020, Patent, Patent No. [US10584120B1, 10584120]
   Ngo VTH, 2018, BIOORGAN MED CHEM, V26, P3133, DOI 10.1016/j.bmc.2018.04.040
   Ngo VTH, 2018, BIOORGAN MED CHEM, V26, P1035, DOI 10.1016/j.bmc.2018.01.015
   Pharmenterprises, 2018, Patent, Patent No. [WO 2018217139A1, 2018217139]
   Pharmenterprises, 2019, Patent, Patent No. [WO2019050429A1, 2019050429]
   Pharmenterprises assignee, 2017, Patent, Patent No. [RU2665633C1, 2665633]
   Pharmenterprises assignee, 2017, Patent, Patent No. [RU2662559C1, 2662559]
   Tran PT, 2019, RSC ADV, V9, P29619, DOI 10.1039/c9ra05763c
   Tran PT, 2013, BIOORGAN MED CHEM, V21, P3821, DOI 10.1016/j.bmc.2013.04.005
   Pivtoraiko VN, 2015, NEUROBIOL AGING, V36, P12, DOI 10.1016/j.neurobiolaging.2014.06.021
   POHL T, 1991, P NATL ACAD SCI USA, V88, P10059, DOI 10.1073/pnas.88.22.10059
   Pozzi C, 2018, J BIOL INORG CHEM, V23, P1219, DOI 10.1007/s00775-018-1605-1
   Probiodrug AG., 2011, Patent, Patent No. [WO2011110613A1, 2011110613]
   Probiodrug AG., 2019, Patent, Patent No. [WO2019063414A1, 2019063414]
   Probiodrug AG., 2005, Patent, Patent No. [WO2005039548A2, 2005039548]
   Probiodrug AG, 2012, Patent, Patent No. [WO2012123563A1, 2012123563]
   Probiodrug AG., 2008, Patent, Patent No. [WO2008128982A1, 2008128982]
   Probiodrug AG., 2008, Patent, Patent No. [WO2008065141A1, 2008065141]
   Probiodrug AG., 2010, Patent, Patent No. [WO2010026209A1, 2010026209]
   Probiodrug AG, 2004, Patent, Patent No. [WO2004098591A2, 2004098591]
   Probiodrug AG., 2010, Patent, Patent No. [WO2010026212A1, 2010026212]
   Probiodrug AG., 2008, Patent, Patent No. [WO2008110523A1, 2008110523]
   Probiodrug AG., 2012, Patent, Patent No. [WO2012163773A1, 2012163773]
   Probiodrug AG., 2008, Patent, Patent No. [WO2008128987A1, 2008128987]
   Probiodrug AG., 2008, Patent, Patent No. [WO2008128984A1, 2008128984]
   Probiodrug AG., 2008, Patent, Patent No. [WO2008128983A1, 2008128983]
   Probiodrug AG., 2018, Patent, Patent No. [WO2018178384A1, 2018178384]
   Probiodrug AG, 2008, Patent, Patent No. [WO2008055945A1, 2008055945]
   Probiodrug AG., 2008, Patent, Patent No. [WO2008055947A1, 2008055947]
   Probiodrug AG., 2008, Patent, Patent No. [WO2008128986A1, 2008128986]
   Probiodrug AG., 2014, Patent, Patent No. [WO2014140279A1, 2014140279]
   Probiodrug AG., 2008, Patent, Patent No. [WO2008128981A1, 2008128981]
   Probiodrug AG, 2011, Patent, Patent No. [WO2011131748A2, 2011131748]
   Probiodrug AG., 2008, Patent, Patent No. [WO2008128985A1, 2008128985]
   Probiodrug AG, 2004, Patent, Patent No. [WO2004098625A2, 2004098625]
   Probiodrug AG, 2008, Patent, Patent No. [WO2008055950A1, 2008055950]
   Probiodrug AG., 2005, Patent, Patent No. [WO2005075436A2, 2005075436]
   Probiodrug AG., 2011, Patent, Patent No. [WO2011107530A2, 2011107530]
   Ramsbeck D, 2013, J MED CHEM, V56, P6613, DOI 10.1021/jm4001709
   SAIDO TC, 1995, NEURON, V14, P457, DOI 10.1016/0896-6273(95)90301-1
   Scheltens P, 2018, ALZHEIMERS RES THER, V10, DOI 10.1186/s13195-018-0431-6
   Schilling S, 2003, J BIOL CHEM, V278, P49773, DOI 10.1074/jbc.M309077200
   Schilling S, 2008, NAT MED, V14, P1106, DOI 10.1038/nm.1872
   Schilling S, 2011, J BIOL CHEM, V286, P14199, DOI 10.1074/jbc.M111.229385
   Schilling S, 2008, J NEUROCHEM, V106, P1225, DOI 10.1111/j.1471-4159.2008.05471.x
   Schlenzig D, 2009, BIOCHEMISTRY-US, V48, P7072, DOI 10.1021/bi900818a
   Shenzhen University, 2020, Patent, Patent No. [CN110903292A, 110903292]
   Shenzhen University, 2016, Patent, Patent No. [CN105384692A, 105384692]
   Shenzhen University, 2018, Patent, Patent No. [CN108912051A, 108912051]
   Shenzhen University, 2020, Patent, Patent No. [CN110950869A, 110950869]
   Shenzhen University, 2016, Patent, Patent No. [CN105384691A, 105384691]
   Shenzhen University assignee, 2019, Patent, Patent No. [CN109305942A, 109305942]
   Sockolosky JT, 2016, P NATL ACAD SCI USA, V113, pE2646, DOI 10.1073/pnas.1604268113
   Stephan A, 2009, FEBS J, V276, P6522, DOI 10.1111/j.1742-4658.2009.07337.x
   Taudte N, 2021, J BIOL CHEM, V296, DOI 10.1016/j.jbc.2021.100263
   Therapeutics, 2020, Patent, Patent No. [WO2020040670A1, 2020040670]
   Mitteldorf CATD, 2011, DIAGN CYTOPATHOL, V39, P556, DOI 10.1002/dc.21423
   Valenti MT, 2013, J ALZHEIMERS DIS, V34, P263, DOI 10.3233/JAD-120517
   Hoang VH, 2019, J MED CHEM, V62, P8011, DOI 10.1021/acs.jmedchem.9b00751
   Hoang VH, 2017, J MED CHEM, V60, P2573, DOI 10.1021/acs.jmedchem.7b00098
   Wang XJ, 2019, INT IMMUNOPHARMACOL, V75, DOI 10.1016/j.intimp.2019.105770
   Willingham SB, 2012, P NATL ACAD SCI USA, V109, P6662, DOI 10.1073/pnas.1121623109
   Wu ZQ, 2019, CELL RES, V29, P502, DOI 10.1038/s41422-019-0177-0
   Zhang QQ, 2016, MOL NEUROBIOL, V53, P6362, DOI 10.1007/s12035-015-9541-3
NR 128
TC 1
Z9 1
U1 2
U2 7
PU TAYLOR & FRANCIS LTD
PI ABINGDON
PA 2-4 PARK SQUARE, MILTON PARK, ABINGDON OR14 4RN, OXON, ENGLAND
SN 1354-3776
EI 1744-7674
J9 EXPERT OPIN THER PAT
JI Expert Opin. Ther. Patents
PD SEP 2
PY 2021
VL 31
IS 9
BP 809
EP 836
DI 10.1080/13543776.2021.1917549
EA JUL 2021
PG 28
WC Chemistry, Medicinal; Pharmacology & Pharmacy
WE Science Citation Index Expanded (SCI-EXPANDED)
SC Pharmacology & Pharmacy
GA UL2EN
UT WOS:000669737100001
PM 33896339
DA 2022-04-10
ER

PT J
AU Terakawa, T
   Takada, S
AF Terakawa, Tsuyoshi
   Takada, Shoji
TI p53 dynamics upon response element recognition explored by molecular
   simulations
SO SCIENTIFIC REPORTS
LA English
DT Article
ID TUMOR-SUPPRESSOR P53; BINDING-SITE; DNA; PROTEINS; ENSEMBLE; COMPLEX;
   DOMAIN; ACETYLATION; RECRUITMENT; ACTIVATION
AB p53 is a representative transcription factor that activates multiple target genes. To realize stimulus-dependent specificities, p53 has to recognize target with structural variety, of which molecular mechanism are largely unknown. Here, we conducted a series of long-time scale (totally more than 100-ms) coarse-grained molecular dynamics simulations, uncovering structure and dynamics of full-length p53 tetramer that recognizes its response element (RE). We obtained structures of a full-length p53 tetramer that binds to the RE, which is strikingly different from the structure of p53 at search. These structures are not only consistent with previous low-resolution or partial structural information, but also give access to previously unreachable detail, such as the preferential distribution of intrinsically disordered regions, the contacts between core domains, the DNA bending, and the connectivity of linker regions. We also explored how the RE variation affects the structure of the p53-RE complex. Further analysis of simulation trajectories revealed how p53 finds out the RE and how post-translational modification affect the search mechanism.
C1 [Terakawa, Tsuyoshi; Takada, Shoji] Kyoto Univ, Grad Sch Sci, Dept Biophys, Sakyo Ku, Kyoto, Japan.
RP Takada, S (corresponding author), Kyoto Univ, Grad Sch Sci, Dept Biophys, Sakyo Ku, Kyoto, Japan.
EM takada@biophys.kyoto-u.ac.jp
FU JSPSMinistry of Education, Culture, Sports, Science and Technology,
   Japan (MEXT)Japan Society for the Promotion of Science; Global COE
   Program "Formation of a Strategic Base for Biodiversity and Evolutionary
   Research: from Genome to Ecosystem" of the Ministry of Education
   Culture, Sports, Science, and Technology (MEXT); Excellent Graduate
   School Program "Biodiversity and Evolution from Genome to Ecosystem"
FX We thank Prof. Carol Prives for advice and valuable comments. The
   calculations in this work were partly performed by using the
   supercomputer of ACCMS, Kyoto University. T.T. acknowledges the support
   of a JSPS fellowship. This work was supported by Grant-in-Aid for JSPS
   Fellows, by Grant-in-Aid for Scientific Research on Innovative Area, by
   the Global COE Program "Formation of a Strategic Base for Biodiversity
   and Evolutionary Research: from Genome to Ecosystem" of the Ministry of
   Education Culture, Sports, Science, and Technology (MEXT) and by the
   Excellent Graduate School Program "Biodiversity and Evolution from
   Genome to Ecosystem".
CR [Anonymous], 1997, ACTIVATION P53 SEQUE, V90, P595
   Barlev NA, 2001, MOL CELL, V8, P1243, DOI 10.1016/S1097-2765(01)00414-2
   Bell S, 2002, J MOL BIOL, V322, P917, DOI 10.1016/S0022-2836(02)00848-3
   Chen YH, 2013, NUCLEIC ACIDS RES, V41, P8368, DOI 10.1093/nar/gkt584
   Chen YH, 2010, STRUCTURE, V18, P246, DOI 10.1016/j.str.2009.11.011
   Clementi C, 2000, J MOL BIOL, V298, P937, DOI 10.1006/jmbi.2000.3693
   ELDEIRY WS, 1992, NAT GENET, V1, P45, DOI 10.1038/ng0492-45
   Espinosa JM, 2001, MOL CELL, V8, P57, DOI 10.1016/S1097-2765(01)00283-0
   FUNK WD, 1992, MOL CELL BIOL, V12, P2866, DOI 10.1128/MCB.12.6.2866
   Gaglia G, 2013, P NATL ACAD SCI USA, V110, P15497, DOI 10.1073/pnas.1311126110
   GINSBERG D, 1991, P NATL ACAD SCI USA, V88, P9979, DOI 10.1073/pnas.88.22.9979
   Gu B, 2012, INT J BIOL SCI, V8, P672, DOI 10.7150/ijbs.4283
   Joerger AC, 2008, ANNU REV BIOCHEM, V77, P557, DOI 10.1146/annurev.biochem.77.060806.091238
   Jordan JJ, 2008, PLOS GENET, V4, DOI 10.1371/journal.pgen.1000104
   Kasper LH, 2011, CELL CYCLE, V10, P212, DOI 10.4161/cc.10.2.14542
   Kenzaki H, 2011, J CHEM THEORY COMPUT, V7, P1979, DOI 10.1021/ct2001045
   Khazanov N, 2011, J MOL BIOL, V408, P335, DOI 10.1016/j.jmb.2011.01.059
   KUMAR S, 1992, J COMPUT CHEM, V13, P1011, DOI 10.1002/jcc.540130812
   Levine AJ, 2009, NAT REV CANCER, V9, P749, DOI 10.1038/nrc2723
   Li WF, 2012, P NATL ACAD SCI USA, V109, P17789, DOI 10.1073/pnas.1201807109
   Lill NL, 1997, NATURE, V387, P823, DOI 10.1038/42981
   Marti-Renom MA, 2000, ANNU REV BIOPH BIOM, V29, P291, DOI 10.1146/annurev.biophys.29.1.291
   McKinney K, 2004, MOL CELL, V16, P413, DOI 10.1016/j.molcel.2004.09.032
   Mittl PRE, 1998, ACTA CRYSTALLOGR D, V54, P86, DOI 10.1107/S0907444997006550
   Natan E, 2011, J MOL BIOL, V409, P358, DOI 10.1016/j.jmb.2011.03.047
   Pan YP, 2007, J BIOL CHEM, V282, P691, DOI 10.1074/jbc.M605908200
   Pan YP, 2008, J PHYS CHEM B, V112, P6716, DOI 10.1021/jp800680w
   Pan YP, 2010, TRENDS GENET, V26, P75, DOI 10.1016/j.tig.2009.12.003
   Pan YP, 2009, PLOS COMPUT BIOL, V5, DOI 10.1371/journal.pcbi.1000448
   Riley T, 2008, NAT REV MOL CELL BIO, V9, P402, DOI 10.1038/nrm2395
   Sambriski EJ, 2009, BIOPHYS J, V96, P1675, DOI 10.1016/j.bpj.2008.09.061
   Sugita Y, 2000, J CHEM PHYS, V113, P6042, DOI 10.1063/1.1308516
   Tafvizi A, 2011, P NATL ACAD SCI USA, V108, P563, DOI 10.1073/pnas.1016020107
   Tang Y, 2008, CELL, V133, P612, DOI 10.1016/j.cell.2008.03.025
   Terakawa T, 2014, BIOPHYS J, V107, P721, DOI 10.1016/j.bpj.2014.06.026
   Terakawa T, 2012, J AM CHEM SOC, V134, P14555, DOI 10.1021/ja305369u
   Terakawa T, 2011, BIOPHYS J, V101, P1450, DOI 10.1016/j.bpj.2011.08.003
   Tidow H, 2007, P NATL ACAD SCI USA, V104, P12324, DOI 10.1073/pnas.0705069104
   Wang B, 2009, P NATL ACAD SCI USA, V106, P14373, DOI 10.1073/pnas.0903284106
   Weinberg RL, 2005, J MOL BIOL, V348, P589, DOI 10.1016/j.jmb.2005.03.014
NR 40
TC 21
Z9 21
U1 1
U2 15
PU NATURE PUBLISHING GROUP
PI LONDON
PA MACMILLAN BUILDING, 4 CRINAN ST, LONDON N1 9XW, ENGLAND
SN 2045-2322
J9 SCI REP-UK
JI Sci Rep
PD NOV 24
PY 2015
VL 5
AR 17107
DI 10.1038/srep17107
PG 10
WC Multidisciplinary Sciences
WE Science Citation Index Expanded (SCI-EXPANDED)
SC Science & Technology - Other Topics
GA CW7RV
UT WOS:000365197800003
PM 26596470
OA gold, Green Submitted, Green Published
DA 2022-04-10
ER

PT J
AU Lee, SY
   Lau, ATY
   Jeong, CH
   Shim, JH
   Kim, HG
   Kim, J
   Bode, AM
   Dong, ZG
AF Lee, Sung-Young
   Lau, Andy T. Y.
   Jeong, Chul-Ho
   Shim, Jung-Hyun
   Kim, Hong-Gyum
   Kim, Jaebong
   Bode, Ann M.
   Dong, Zigang
TI Histone XH2AX Is Required for Xenopus Anterior Neural Development
   CRITICAL ROLE OF THREONINE 16 PHOSPHORYLATION
SO JOURNAL OF BIOLOGICAL CHEMISTRY
LA English
DT Article
ID DORSAL MARGINAL ZONE; dna damage; CHROMATIN MODIFICATIONS; CHK1;
   METHYLATION; H2AX; SPECIFICATION; TRANSCRIPTION; REPLICATION; KINASES
AB A role for histone H2AX, one of the variants of the nucleosome core histone H2A, has been demonstrated in DNA repair, tumor suppression, apoptosis, and cell cycle checkpoint function. However, the physiological function and post-translational modification of histone H2AX during vertebrate development have not been elucidated. Here, we provide evidence showing that Xenopus histone H2AX (XH2AX) has a role in the anterior neural plate for eye field formation during Xenopus embryogenesis. A loss-of-function study clearly demonstrated a critical role of XH2AX in anterior neural specification. Through a differentiation assay with Xenopus animal cap embryonic stem cells, we confirmed that XH2AX is required for the activin-induced anterior neural specification of the ectoderm. Furthermore, we found that Chk1 is an essential kinase to phosphorylate histone XH2AX at Thr(16), which is involved in the biological function of this histone. Taken together, our findings reveal that XH2AX has a specific role in anterior neural formation of Xenopus, which is mediated through phosphorylation of XH2AX at Thr(16) by Chk1.
C1 [Lee, Sung-Young; Lau, Andy T. Y.; Jeong, Chul-Ho; Shim, Jung-Hyun; Kim, Hong-Gyum; Bode, Ann M.; Dong, Zigang] Univ Minnesota, Hormel Inst, Austin, MN 55912 USA.
   [Kim, Jaebong] Hallym Univ, Coll Med, Dept Biochem, Chunchon 200702, Kangwon Do, South Korea.
RP Dong, ZG (corresponding author), Univ Minnesota, Hormel Inst, 801 16th Ave NE, Austin, MN 55912 USA.
EM zgdong@hi.umn.edu
RI Lau, Andy Tao Yin/AAX-9980-2021; Kim, Jaebong/AAV-1986-2021
OI Lau, Andy Tao Yin/0000-0002-7146-7789; Kim, Jaebong/0000-0003-1609-338X;
   Shim, Jung-Hyun/0000-0002-4062-4016
FU National Institutes of HealthUnited States Department of Health & Human
   ServicesNational Institutes of Health (NIH) - USA [CA077646, CA111536,
   CA120388, R37 CA081064, ES016548]; Hormel Foundation; NATIONAL CANCER
   INSTITUTEUnited States Department of Health & Human ServicesNational
   Institutes of Health (NIH) - USANIH National Cancer Institute (NCI)
   [R01CA120388, R01CA111536, R01CA077646, R37CA081064] Funding Source: NIH
   RePORTER; NATIONAL INSTITUTE OF ENVIRONMENTAL HEALTH SCIENCESUnited
   States Department of Health & Human ServicesNational Institutes of
   Health (NIH) - USANIH National Institute of Environmental Health
   Sciences (NIEHS) [R01ES016548] Funding Source: NIH RePORTER
FX This work was supported, in whole or in part, by National Institutes of
   Health Grants CA077646, CA111536, CA120388, R37 CA081064, and ES016548.;
   This work was also supported by The Hormel Foundation.
CR ARIIZUMI T, 2009, CURR PROTOC STEM CEL, pCH1
   Ausio Juan, 2006, Briefings in Functional Genomics & Proteomics, V5, P228, DOI 10.1093/bfgp/ell020
   Bartek J, 2003, CANCER CELL, V3, P421, DOI 10.1016/S1535-6108(03)00110-7
   Bhaumik SR, 2007, NAT STRUCT MOL BIOL, V14, P1008, DOI 10.1038/nsmb1337
   Boddy MN, 1998, SCIENCE, V280, P909, DOI 10.1126/science.280.5365.909
   Chowdhury D, 2005, MOL CELL, V20, P801, DOI 10.1016/j.molcel.2005.10.003
   Cosgrove MS, 2005, BIOCHEM CELL BIOL, V83, P468, DOI 10.1139/O05-137
   Ehrenhofer-Murray AE, 2004, EUR J BIOCHEM, V271, P2335, DOI 10.1111/j.1432-1033.2004.04162.x
   Enders GH, 2008, J BIOL CHEM, V283, P17749, DOI 10.1074/jbc.R800021200
   EYAL-GILADI H., 1954, ARCH BIOL [PARIS], V65, P179
   Fernandez-Capetillo O, 2004, DNA REPAIR, V3, P959, DOI 10.1016/j.dnarep.2004.03.024
   Furnari B, 1997, SCIENCE, V277, P1495, DOI 10.1126/science.277.5331.1495
   Grant PA, 2001, GENOME BIOL, V2
   GREEN JBA, 1990, NATURE, V347, P391, DOI 10.1038/347391a0
   Green JBA, 1997, P NATL ACAD SCI USA, V94, P8596, DOI 10.1073/pnas.94.16.8596
   Hadnagy A, 2008, MOL CANCER THER, V7, P740, DOI 10.1158/1535-7163.MCT-07-2284
   Heasman J, 2006, DEVELOPMENT, V133, P1205, DOI 10.1242/dev.02304
   Iouzalen N, 1996, NUCLEIC ACIDS RES, V24, P3947, DOI 10.1093/nar/24.20.3947
   ISENBERG I, 1979, ANNU REV BIOCHEM, V48, P159, DOI 10.1146/annurev.bi.48.070179.001111
   Joo HY, 2007, NATURE, V449, P1068, DOI 10.1038/nature06256
   Kouzarides T, 2007, CELL, V128, P693, DOI 10.1016/j.cell.2007.02.005
   Lu CR, 2006, MOL CELL, V23, P121, DOI 10.1016/j.molcel.2006.05.023
   Lupo G, 2000, INT J DEV BIOL, V44, P627
   Margueron R, 2005, CURR OPIN GENET DEV, V15, P163, DOI 10.1016/j.gde.2005.01.005
   Okabayashi K, 2003, CURR OPIN GENET DEV, V13, P502, DOI 10.1016/S0959-437X(03)00111-4
   Papan C, 2007, DEV BIOL, V305, P161, DOI 10.1016/j.ydbio.2007.02.005
   Redon C, 2002, CURR OPIN GENET DEV, V12, P162, DOI 10.1016/S0959-437X(02)00282-4
   Ridgway P, 2004, J BIOL CHEM, V279, P43815, DOI 10.1074/jbc.M408409200
   Ruiz i Altaba A, 1989, Nature, V341, P33
   Sanchez Y, 1997, SCIENCE, V277, P1497, DOI 10.1126/science.277.5331.1497
   Shechter D, 2007, NAT PROTOC, V2, P1445, DOI 10.1038/nprot.2007.202
   SHIH J, 1992, DEVELOPMENT, V116, P887
   Shilatifard A, 2006, ANNU REV BIOCHEM, V75, P243, DOI 10.1146/annurev.biochem.75.103004.142422
   Shimada M, 2008, CELL, V132, P221, DOI 10.1016/j.cell.2007.12.013
   Steinbach OC, 1997, NATURE, V389, P395, DOI 10.1038/38755
   Takai H, 2000, GENE DEV, V14, P1439
   THOMSEN G, 1990, CELL, V63, P485, DOI 10.1016/0092-8674(90)90445-K
   Torres-Padilla ME, 2007, NATURE, V445, P214, DOI 10.1038/nature05458
   Vermaak D, 1998, CURR BIOL, V8, P533, DOI 10.1016/S0960-9822(98)70206-4
   Ward IM, 2001, J BIOL CHEM, V276, P47759, DOI 10.1074/jbc.C100569200
   Wuebbles RD, 2004, CELL MOL LIFE SCI, V61, P2148, DOI 10.1007/s00018-004-4175-z
   Wysocka J, 2005, CELL, V121, P859, DOI 10.1016/j.cell.2005.03.036
   Xiao A, 2009, NATURE, V457, P57, DOI 10.1038/nature07668
   Xu RH, 1996, P NATL ACAD SCI USA, V93, P834, DOI 10.1073/pnas.93.2.834
   Zaid O, 2005, CELL MOL LIFE SCI, V62, P1653, DOI 10.1007/s00018-005-5091-6
   Zaugg K, 2007, P NATL ACAD SCI USA, V104, P3805, DOI 10.1073/pnas.0611584104
   Zuber ME, 2003, DEVELOPMENT, V130, P5155, DOI 10.1242/dev.00723
NR 47
TC 7
Z9 7
U1 0
U2 2
PU AMER SOC BIOCHEMISTRY MOLECULAR BIOLOGY INC
PI ROCKVILLE
PA 11200 ROCKVILLE PIKE, SUITE 302, ROCKVILLE, MD, UNITED STATES
SN 0021-9258
EI 1083-351X
J9 J BIOL CHEM
JI J. Biol. Chem.
PD SEP 17
PY 2010
VL 285
IS 38
BP 29525
EP 29534
DI 10.1074/jbc.M110.127233
PG 10
WC Biochemistry & Molecular Biology
WE Science Citation Index Expanded (SCI-EXPANDED)
SC Biochemistry & Molecular Biology
GA 649BC
UT WOS:000281740100054
PM 20639511
OA Green Published, hybrid
DA 2022-04-10
ER

PT J
AU Vadysirisack, DD
   Shen, DH
   Jhiang, SM
AF Vadysirisack, DD
   Shen, DH
   Jhiang, SM
TI Correlation of Na+/I- symporter expression and activity: Implications of
   Na+/I- symporter as an imaging reporter gene
SO JOURNAL OF NUCLEAR MEDICINE
LA English
DT Article
DE sodium iodide symporter; NIS; imaging reporter gene; cell-surface
   trafficking
ID SODIUM-IODIDE SYMPORTER; POSITRON-EMISSION-TOMOGRAPHY; SODIUM/IODIDE
   SYMPORTER; IN-VIVO; THYROID-CANCER; THERAPY; ADENOVIRUS; KINETICS;
   RADIOIODIDE; MUTATION
AB The Na+/I- symporter (NIS) has been proposed as an imaging reporter gene to ascertain the expression of therapeutic genes in targeted tissues. In this study, we investigated whether post-translational processing and cell-surface trafficking of NIS affect NIS-mediated radioiodide uptake in cells expressing exogenous NIS. Methods: We established FTC133, HeLa, and PC12 cell lines with doxycycline-inducible NIS expression to investigate the correlation among total NIS protein levels, cell-surface NIS protein levels, and NIS-mediated radioiodide uptake in cells induced with various levels of NIS. Results: We found that most exogenous NIS proteins were efficiently trafficked to the cell surface; thus, a possible deficiency in NIS cell-surface trafficking is not a concern for clinical applications of NIS gene transfer. The extent of radioiodide uptake correlated with cell-surface NIS protein level within a certain range, suggesting that the imaging Signals can quantify levels of NIS expression only within a certain range in vivo. Finally, a moderate increase in NIS protein level significantly increased radioiodide uptake, indicating that a low level of NIS expression is sufficient to facilitate radionuclide imaging in vivo. Conclusion: Our study suggests that NIS will be useful as an imaging reporter gene to ascertain that the therapeutic gene is localized to the correct tissue and to monitor the expression levels and duration of the therapeutic gene.
C1 Ohio State Univ, Integrated Biomed Sci Grad Program, Columbus, OH 43210 USA.
   Ohio State Univ, Dept Physiol & Cell Biol, Columbus, OH 43210 USA.
   Tri Serv Gen Hosp, Natl Def Med Ctr, Dept Nucl Med, Taipei, Taiwan.
   Ohio State Univ, Dept Internal Med, Columbus, OH 43210 USA.
RP Jhiang, SM (corresponding author), Ohio State Univ, Integrated Biomed Sci Grad Program, 304 Hamilton Hall,1645 Neil Ave, Columbus, OH 43210 USA.
EM jhiang.1@osu.edu
FU NIBIB NIH HHSUnited States Department of Health & Human ServicesNational
   Institutes of Health (NIH) - USANIH National Institute of Biomedical
   Imaging & Bioengineering (NIBIB) [1 R01 EB001876-01] Funding Source:
   Medline; NATIONAL INSTITUTE OF BIOMEDICAL IMAGING AND
   BIOENGINEERINGUnited States Department of Health & Human
   ServicesNational Institutes of Health (NIH) - USANIH National Institute
   of Biomedical Imaging & Bioengineering (NIBIB) [R01EB001876] Funding
   Source: NIH RePORTER
CR Allport JR, 2001, EXP HEMATOL, V29, P1237, DOI 10.1016/S0301-472X(01)00739-1
   Boland A, 2000, CANCER RES, V60, P3484
   Castro MR, 2001, J CLIN ENDOCR METAB, V86, P5627, DOI 10.1210/jc.86.11.5627
   Cho JY, 2000, GENE THER, V7, P740, DOI 10.1038/sj.gt.3301170
   Cho JY, 2002, GENE THER, V9, P1139, DOI 10.1038/sj.gt.3301787
   Dohan O, 2003, ENDOCR REV, V24, P48, DOI 10.1210/er.2001-0029
   Eskandari S, 1997, J BIOL CHEM, V272, P27230, DOI 10.1074/jbc.272.43.27230
   Groot-Wassink T, 2004, MOL THER, V9, P436, DOI 10.1016/j.ymthe.2003.12.001
   Groot-Wassink T, 2002, HUM GENE THER, V13, P1723, DOI 10.1089/104303402760293565
   Jacobs A, 2001, J NUCL MED, V42, P467
   Kaneda Yasufumi, 2001, Current Molecular Medicine (Hilversum), V1, P493, DOI 10.2174/1566524013363519
   Kosugi S, 2002, J CLIN ENDOCR METAB, V87, P3830, DOI 10.1210/jc.87.8.3830
   La Perle KMD, 2002, PROSTATE, V50, P170, DOI 10.1002/pros.10046
   Lee KH, 2005, J NUCL MED, V46, P652
   Lee WW, 2003, ONCOL REP, V10, P845
   Levy O, 1997, P NATL ACAD SCI USA, V94, P5568, DOI 10.1073/pnas.94.11.5568
   Levy O, 1998, J BIOL CHEM, V273, P22657, DOI 10.1074/jbc.273.35.22657
   Mandell RB, 1999, CANCER RES, V59, P661
   Marsee DK, 2004, J BIOL CHEM, V279, P43990, DOI 10.1074/jbc.M407503200
   Marsee DK, 2004, CANCER GENE THER, V11, P121, DOI 10.1038/sj.cgt.7700661
   Mitrofanova E, 2004, CLIN CANCER RES, V10, P6969, DOI 10.1158/1078-0432.CCR-04-0687
   Niu G, 2005, EUR J NUCL MED MOL I, V32, P534, DOI 10.1007/s00259-004-1715-6
   Petrich I, 2003, NUKLEARMED-NUCL MED, V42, P15
   Phillips AJ, 2001, J PHARM PHARMACOL, V53, P1169, DOI 10.1211/0022357011776603
   Pohlenz J, 2000, J CLIN ENDOCR METAB, V85, P2366, DOI 10.1210/jc.85.7.2366
   Pohlenz J, 1997, BIOCHEM BIOPH RES CO, V240, P488, DOI 10.1006/bbrc.1997.7594
   Pohlenz J, 1998, J CLIN INVEST, V101, P1028, DOI 10.1172/JCI1504
   Shen DHY, 2004, GENE THER, V11, P161, DOI 10.1038/sj.gt.3302147
   Shen DHY, 2001, THYROID, V11, P415, DOI 10.1089/105072501300176372
   Shin JH, 2004, EUR J NUCL MED MOL I, V31, P425, DOI 10.1007/s00259-003-1394-8
   Smanik PA, 1996, BIOCHEM BIOPH RES CO, V226, P339, DOI 10.1006/bbrc.1996.1358
   Smit JWA, 2002, J CLIN ENDOCR METAB, V87, P1247, DOI 10.1210/jc.87.3.1247
   Tonacchera M, 2002, J CLIN ENDOCR METAB, V87, P352, DOI 10.1210/jc.87.1.352
   Urbain JLC, 2001, J NUCL MED, V42, P106
   ZHANG Z, 2005, J CLIN ENDOCRIN 0816
   Zuckier LS, 2004, J NUCL MED, V45, P500
NR 36
TC 15
Z9 20
U1 0
U2 1
PU SOC NUCLEAR MEDICINE INC
PI RESTON
PA 1850 SAMUEL MORSE DR, RESTON, VA 20190-5316 USA
SN 0161-5505
EI 1535-5667
J9 J NUCL MED
JI J. Nucl. Med.
PD JAN
PY 2006
VL 47
IS 1
BP 182
EP 190
PG 9
WC Radiology, Nuclear Medicine & Medical Imaging
WE Science Citation Index Expanded (SCI-EXPANDED)
SC Radiology, Nuclear Medicine & Medical Imaging
GA 003JZ
UT WOS:000234679300030
PM 16391203
DA 2022-04-10
ER

PT J
AU Specht, S
   Sarite, SR
   Hauber, I
   Hauber, J
   Gorbig, UF
   Meier, C
   Bevec, D
   Hoerauf, A
   Kaiser, A
AF Specht, Sabine
   Sarite, Salem Ramadan
   Hauber, Ilona
   Hauber, Joachim
   Goerbig, Ulf F.
   Meier, Chris
   Bevec, Dorian
   Hoerauf, Achim
   Kaiser, Annette
TI The guanylhydrazone CNI-1493: an inhibitor with dual activity against
   malaria - inhibition of host cell pro-inflammatory cytokine release and
   parasitic deoxyhypusine synthase
SO PARASITOLOGY RESEARCH
LA English
DT Article
ID TUMOR-NECROSIS-FACTOR; PLASMODIUM-FALCIPARUM; CEREBRAL MALARIA;
   PATHOGENESIS; SUPPRESSION; DISEASE; ENZYME; ALPHA; IDENTIFICATION;
   TRANSLATION
AB Malaria is still a major cause of death in the tropics. There is an urgent need for new anti-malarial drugs because drug-resistant plasmodia frequently occur. Over recent years, we elucidated the biosynthesis of hypusine, a novel amino acid contained in eukaryotic initiation factor 5A (eIF-5A) in Plasmodium. Hypusine biosynthesis involves catalysis of deoxyhypusine synthase (DHS) in the first step of post-translational modification. In a screen for new inhibitor of purified plasmodium DHS, CNI-1493, a novel selective pro-inflammatory cytokine inhibitor used in clinical phase II for the treatment of Crohn's disease, inhibited the enzyme of the parasite 3-fold at a concentration of 2 mu M. In vitro experiments with 200 mu M CNI-1493 in Plasmodium-infected erythrocytes, which lack nuclei and DHS protein, showed a parasite clearance within 2 days. This can presumably be attributed to an anti-proliferating effect because of the inhibition of DHS by the parasite. The determined IC50 of CNI-1493 was 135.79 mu M after 72 h. In vivo application of this substance in Plasmodium berghei ANKA-infected C57BL/6 mice significantly reduced parasitemia after dosage of 1 mg/kg or 4 mg/kg/body weight and prevented death of mice with cerebral malaria. This effect was paralleled by a decrease in serum TNF levels of the mice. We suggest that the new mechanism of CNI-1493 is caused by a decrease in modified eIF-5A biosynthesis with a downstream effect on the TNF synthesis of the host. From the current data, we consider CNI-1493 to be a promising drug for anti-malarial therapy because of its combined action, i.e., the decrease in eIF-5A biosynthesis of the parasite and host cell TNF biosynthesis.
C1 [Bevec, Dorian] MondoBiotech AG, CH-4052 Basel, Switzerland.
   [Goerbig, Ulf F.; Meier, Chris] Univ Hamburg, Inst Organ Chem, D-20146 Hamburg, Germany.
   [Hauber, Ilona; Hauber, Joachim] Univ Hamburg, Heinrich Pette Inst Expt Virol & Immunol, D-20251 Hamburg, Germany.
   [Specht, Sabine; Sarite, Salem Ramadan; Hauber, Ilona; Kaiser, Annette] Inst Med Microbiol Immunol & Parasitol, D-53105 Bonn, Germany.
RP Kaiser, A (corresponding author), Fachhochschule Bonn Rhein Sieg, Von Liebig Str 20, D-53359 Rheinbach, Germany.
EM annette.kaiser@fh-brs.de
RI Meier, Chris/X-6105-2019
OI Kaiser, Annette/0000-0001-7873-3958
CR Atkins HB, 2001, CLIN CANCER RES, V7, P486
   Bevec D, 1996, SCIENCE, V271, P1858, DOI 10.1126/science.271.5257.1858
   Bianchi M, 1996, J EXP MED, V183, P927, DOI 10.1084/jem.183.3.927
   Caraglia M, 2003, J BIOCHEM, V133, P757, DOI 10.1093/jb/mvg097
   Clark IA, 2006, MALARIA J, V5, DOI 10.1186/1475-2875-5-85
   Cohen PS, 1996, P NATL ACAD SCI USA, V93, P3967, DOI 10.1073/pnas.93.9.3967
   Danese S, 2006, MINI-REV MED CHEM, V6, P771, DOI 10.2174/138955706777698624
   Gimenez F, 2003, CELL MOL LIFE SCI, V60, P1623, DOI 10.1007/s00018-003-2347-x
   Haider N, 2005, MOL BIOCHEM PARASIT, V142, P224, DOI 10.1016/j.molbiopara.2005.04.004
   Hauber I, 2005, J CLIN INVEST, V115, P76, DOI 10.1172/JCI200521949
   Kaiser A, 2003, PARASITOL RES, V91, P508, DOI 10.1007/s00436-003-0970-y
   Kaiser A, 2007, BIOORGAN MED CHEM, V15, P6200, DOI 10.1016/j.bmc.2007.06.026
   Lou J, 2001, CLIN MICROBIOL REV, V14, P810, DOI 10.1128/CMR.14.4.810-820.2001
   Lowenberg M, 2005, J IMMUNOL, V175, P2293, DOI 10.4049/jimmunol.175.4.2293
   Lucas R, 1997, EUR J IMMUNOL, V27, P1719, DOI 10.1002/eji.1830270719
   MOLONEY MB, 1990, T ROY SOC TROP MED H, V84, P516, DOI 10.1016/0035-9203(90)90020-F
   Muller S, 2000, J BIOL CHEM, V275, P8097, DOI 10.1074/jbc.275.11.8097
   Njuguna JT, 2006, BMC MICROBIOL, V6, DOI 10.1186/1471-2180-6-91
   Park MH, 2006, J BIOCHEM, V139, P161, DOI 10.1093/jb/mvj034
   SASAKI K, 1997, FEBS LETT, V121, P769
   Schofield L, 2005, NAT REV IMMUNOL, V5, P722, DOI 10.1038/nri1686
   Schutz S, 2006, J MOL BIOL, V358, P997, DOI 10.1016/j.jmb.2006.02.041
   SITARAMAN SV, 2003, CURR OPIN INVEST DR, V11, P1363
   Sommer MN, 2004, J BIOMOL SCREEN, V9, P434, DOI 10.1177/1087057104264031
   Taylor CA, 2004, INVEST OPHTH VIS SCI, V45, P3568, DOI 10.1167/iovs.03-1367
   TRAGER W, 1992, P NATL ACAD SCI USA, V89, P5351, DOI 10.1073/pnas.89.12.5351
   Umland TC, 2004, J BIOL CHEM, V279, P28697, DOI 10.1074/jbc.M404095200
   Wang TW, 2005, PLANT PHYSIOL, V138, P1372, DOI 10.1104/pp.105.060194
   Zanelli CF, 2006, BIOCHEM BIOPH RES CO, V348, P1358, DOI 10.1016/j.bbrc.2006.07.195
NR 29
TC 24
Z9 25
U1 0
U2 6
PU SPRINGER
PI NEW YORK
PA 233 SPRING ST, NEW YORK, NY 10013 USA
SN 0932-0113
EI 1432-1955
J9 PARASITOL RES
JI Parasitol. Res.
PD MAY
PY 2008
VL 102
IS 6
BP 1177
EP 1184
DI 10.1007/s00436-008-0891-x
PG 8
WC Parasitology
WE Science Citation Index Expanded (SCI-EXPANDED)
SC Parasitology
GA 285VX
UT WOS:000254805400010
PM 18256853
DA 2022-04-10
ER

PT J
AU Penuela, S
   Gehi, R
   Laird, DW
AF Penuela, Silvia
   Gehi, Ruchi
   Laird, Dale W.
TI The biochemistry and function of pannexin channels
SO BIOCHIMICA ET BIOPHYSICA ACTA-BIOMEMBRANES
LA English
DT Review
DE Pannexin; Biochemistry; Physiological function; Panx1; Panx2; Panx3
ID GAP-JUNCTION HEMICHANNELS; CELL-CELL COMMUNICATION; C6 GLIOMA-CELLS; ATP
   RELEASE; INTERCELLULAR COMMUNICATION; P2X(7) RECEPTOR; TASTE-BUDS;
   EXPRESSION; PROTEINS; CONNEXIN
AB Three family members compose the pannexin family of channel-forming glycoproteins (Panx1, Panx2 and Panx3). Their primary function is defined by their capacity to form single-membrane channels that are regulated by post-translational modification, channel intermixing, and sub-cellular expression profiles. Panx1 is ubiquitously expressed in many mammalian tissues, while Panx2 and Panx3 appear to be more restricted in their expression. Paracrine functions of Panx1 as an ATP release channel have been extensively studied and this channel plays a key role, among others, in the release of "find-me" signals for apoptotic cell clearance. In addition Panx1 has been linked to propagation of calcium waves, regulation of vascular tone, mucociliary lung clearance, taste-bud function and has been shown to act like a tumor suppressor in gliomas. Panx1 channel opening can also be detrimental, contributing to cell death and seizures under ischemic or epileptic conditions and even facilitating HIV-1 viral infection. Panx2 is involved in differentiation of neurons while Panx3 plays a role in the differentiation of chondrocytes, osteoblasts and the maturation and transport of sperm. Using the available Panx1 knockout mouse models it has now become possible to explore some of its physiological functions. However, given the potential for one pannexin to compensate for another it seems imperative to generate single and double knockout mouse models involving all three pannexins and evaluate their interplay in normal differentiation and development as well as in malignant transformation and disease. This article is part of a Special Issue entitled: The communicating junctions, roles and dysfunctions. (c) 2012 Elsevier B.V. All rights reserved.
C1 [Penuela, Silvia; Gehi, Ruchi; Laird, Dale W.] Univ Western Ontario, Dept Anat & Cell Biol, London, ON N6A 5C1, Canada.
RP Laird, DW (corresponding author), Univ Western Ontario, Dept Anat & Cell Biol, Dent Sci Bldg, London, ON N6A 5C1, Canada.
EM Dale.Laird@schulich.uwo.ca
RI Laird, Dale W/AAL-2407-2020; Penuela, Silvia/A-6961-2010; Laird, Dale
   w/E-4176-2015
OI Laird, Dale W/0000-0002-4568-3285; Penuela, Silvia/0000-0003-4829-5517; 
FU Canadian Institutes of Health ResearchCanadian Institutes of Health
   Research (CIHR)
FX The authors would like to thank Dr. Qing Shao for her assistance with
   the pannexin studies and Dr. Jared Churko for preparing Fig. 1. This
   work was supported by the Canadian Institutes of Health Research to DWL.
CR Ambrosi C, 2010, J BIOL CHEM, V285, P24420, DOI 10.1074/jbc.M110.115444
   Anselmi F, 2008, P NATL ACAD SCI USA, V105, P18770, DOI 10.1073/pnas.080079310S
   Bao L, 2004, FEBS LETT, V572, P65, DOI 10.1016/j.febslet.2004.07.009
   Baranova A, 2004, GENOMICS, V83, P706, DOI 10.1016/j.ygeno.2003.09.025
   Barbe MT, 2006, PHYSIOLOGY, V21, P103, DOI 10.1152/physiol.00048.2005
   Bargiotas P, 2011, P NATL ACAD SCI USA, V108, P20772, DOI 10.1073/pnas.1018262108
   Bauer R, 2005, CHEM BIOL, V12, P515, DOI 10.1016/j.chembiol.2005.02.013
   Bennett MVL, 2004, NEURON, V41, P495, DOI 10.1016/S0896-6273(04)00043-1
   BERGFELD GR, 1992, CARDIOVASC RES, V26, P40, DOI 10.1093/cvr/26.1.40
   Berridge MJ, 2003, NAT REV MOL CELL BIO, V4, P517, DOI 10.1038/nrm1155
   Bhalla-Gehi R, 2010, J BIOL CHEM, V285, P9147, DOI 10.1074/jbc.M109.082008
   Billaud M, 2011, CIRC RES, V109, P80, DOI 10.1161/CIRCRESAHA.110.237594
   Boassa D, 2008, CELL COMMUN ADHES, V15, P119, DOI 10.1080/15419060802013885
   Boassa D, 2007, J BIOL CHEM, V282, P31733, DOI 10.1074/jbc.M702422200
   Bond SR, 2011, J BONE MINER RES, V26, P2911, DOI 10.1002/jbmr.509
   Bruzzone R, 2005, J NEUROCHEM, V92, P1033, DOI 10.1111/j.1471-4159.2004.02947.x
   Bruzzone R, 2003, P NATL ACAD SCI USA, V100, P13644, DOI 10.1073/pnas.2233464100
   Bruzzone R, 1996, EUR J BIOCHEM, V238, P1, DOI 10.1111/j.1432-1033.1996.0001q.x
   Bruzzone R, 2006, CELL TISSUE RES, V326, P239, DOI 10.1007/s00441-006-0287-0
   Bunse S, 2005, CELL COMMUN ADHES, V12, P231, DOI 10.1080/15419060500511834
   Bunse S, 2009, FEBS J, V276, P6258, DOI 10.1111/j.1742-4658.2009.07334.x
   Celetti SJ, 2010, J CELL SCI, V123, P1363, DOI 10.1242/jcs.056093
   Chekeni FB, 2010, NATURE, V467, P863, DOI 10.1038/nature09413
   Dahl G, 2006, IUBMB LIFE, V58, P409, DOI 10.1080/15216540600794526
   Dando R, 2009, J PHYSIOL-LONDON, V587, P5899, DOI 10.1113/jphysiol.2009.180083
   Dvoriantchikova G, 2006, FEBS LETT, V580, P2178, DOI 10.1016/j.febslet.2006.03.026
   Dvoriantchikova G, 2006, MOL VIS, V12, P1417
   Foote CI, 1998, J CELL BIOL, V140, P1187, DOI 10.1083/jcb.140.5.1187
   Goodenough DA, 1996, ANNU REV BIOCHEM, V65, P475, DOI 10.1146/annurev.bi.65.070196.002355
   Huang Y, 2007, GLIA, V55, P46, DOI 10.1002/glia.20435
   Huang YJ, 2007, P NATL ACAD SCI USA, V104, P6436, DOI 10.1073/pnas.0611280104
   Iovine MK, 2008, FEBS LETT, V582, P165, DOI 10.1016/j.febslet.2007.11.079
   Ishikawa M, 2011, J CELL BIOL, V193, P1257, DOI 10.1083/jcb.201101050
   Iwamoto T, 2010, J BIOL CHEM, V285, P18948, DOI 10.1074/jbc.M110.127027
   Kanneganti TD, 2007, IMMUNITY, V26, P433, DOI 10.1016/j.immuni.2007.03.008
   Lai CPK, 2009, ONCOGENE, V28, P4402, DOI 10.1038/onc.2009.283
   Lai CPK, 2007, CANCER RES, V67, P1545, DOI 10.1158/0008-5472.CAN-06-1396
   Li S, 2011, ENDOCRINOLOGY, V152, P2342, DOI 10.1210/en.2010-1216
   Locovei S, 2006, FEBS LETT, V580, P239, DOI 10.1016/j.febslet.2005.12.004
   Locovei S, 2007, FEBS LETT, V581, P483, DOI 10.1016/j.febslet.2006.12.056
   Locovei S, 2006, P NATL ACAD SCI USA, V103, P7655, DOI 10.1073/pnas.0601037103
   Ma WH, 2009, J PHARMACOL EXP THER, V328, P409, DOI 10.1124/jpet.108.146365
   Panchin Y, 2000, CURR BIOL, V10, pR473, DOI 10.1016/S0960-9822(00)00576-5
   Pelegrin P, 2006, EMBO J, V25, P5071, DOI 10.1038/sj.emboj.7601378
   Penuela S, 2008, CELL COMMUN ADHES, V15, P133, DOI 10.1080/15419060802014115
   Penuela S, 2007, J CELL SCI, V120, P3772, DOI 10.1242/jcs.009514
   Penuela S, 2009, MOL BIOL CELL, V20, P4313, DOI 10.1091/mbc.E09-01-0067
   Qiu F, 2009, AM J PHYSIOL-CELL PH, V296, pC250, DOI 10.1152/ajpcell.00433.2008
   Qu Y, 2011, J IMMUNOL, V186, P6553, DOI 10.4049/jimmunol.1100478
   Ransford GA, 2009, AM J RESP CELL MOL, V41, P525, DOI 10.1165/rcmb.2008-0367OC
   Ray A, 2005, EUR J NEUROSCI, V21, P3277, DOI 10.1111/j.1460-9568.2005.04139.x
   Ray A, 2006, CEREBELLUM, V5, P189, DOI 10.1080/14734220500530082
   Reigada D, 2008, NEUROSCIENCE, V157, P396, DOI 10.1016/j.neuroscience.2008.08.036
   Saez JC, 2005, BBA-BIOMEMBRANES, V1711, P215, DOI 10.1016/j.bbamem.2005.01.014
   Santiago MF, 2011, PLOS ONE, V6, DOI 10.1371/journal.pone.0025178
   Scemes E, 2007, NEURON GLIA BIOL, V3, P199, DOI 10.1017/S1740925X08000069
   Scemes E, 2009, PFLUG ARCH EUR J PHY, V457, P1207, DOI 10.1007/s00424-008-0591-5
   Schenk U, 2008, SCI SIGNAL, V1, DOI 10.1126/scisignal.1160583
   Seminario-Vidal L, 2011, J BIOL CHEM, V286, P26277, DOI 10.1074/jbc.M111.260562
   Seror C, 2011, J EXP MED, V208, P1823, DOI 10.1084/jem.20101805
   Shestopalov VI, 2008, CELL MOL LIFE SCI, V65, P376, DOI 10.1007/s00018-007-7200-1
   Silverman WR, 2009, J BIOL CHEM, V284, P18143, DOI 10.1074/jbc.M109.004804
   Sohl G, 2005, NAT REV NEUROSCI, V6, P191, DOI 10.1038/nrn1627
   Sosinsky GE, 2011, CHANNELS, V5, P193, DOI 10.4161/chan.5.3.15765
   Swayne LA, 2010, J BIOL CHEM, V285, P24977, DOI 10.1074/jbc.M110.130054
   Thompson RJ, 2006, SCIENCE, V312, P924, DOI 10.1126/science.1126241
   Thompson RJ, 2008, SCIENCE, V322, P1555, DOI 10.1126/science.1165209
   Turmel P, 2011, MOL REPROD DEV, V78, P124, DOI 10.1002/mrd.21280
   Vanden Abeele F, 2006, J CELL BIOL, V174, P535, DOI 10.1083/jcb.200601115
   Vogt A, 2005, MOL BRAIN RES, V141, P113, DOI 10.1016/j.molbrainres.2005.08.002
   Wang JJ, 2007, AM J PHYSIOL-CELL PH, V293, pC1112, DOI 10.1152/ajpcell.00097.2007
   Wang JJ, 2010, J GEN PHYSIOL, V136, P515, DOI 10.1085/jgp.201010440
   Wang XH, 2009, J COMP NEUROL, V512, P336, DOI 10.1002/cne.21898
   Weickert S, 2005, MOL BRAIN RES, V133, P102, DOI 10.1016/j.molbrainres.2004.09.026
   Yen MR, 2007, PROG BIOPHYS MOL BIO, V94, P5, DOI 10.1016/j.pbiomolbio.2007.03.006
   Zappala A, 2006, NEUROSCIENCE, V141, P167, DOI 10.1016/j.neuroscience.2006.03.053
   Zoidl G, 2007, NEUROSCIENCE, V146, P9, DOI 10.1016/j.neuroscience.2007.01.061
NR 77
TC 237
Z9 246
U1 3
U2 73
PU ELSEVIER SCIENCE BV
PI AMSTERDAM
PA PO BOX 211, 1000 AE AMSTERDAM, NETHERLANDS
SN 0005-2736
J9 BBA-BIOMEMBRANES
JI Biochim. Biophys. Acta-Biomembr.
PD JAN
PY 2013
VL 1828
IS 1
SI SI
BP 15
EP 22
DI 10.1016/j.bbamem.2012.01.017
PG 8
WC Biochemistry & Molecular Biology; Biophysics
WE Science Citation Index Expanded (SCI-EXPANDED)
SC Biochemistry & Molecular Biology; Biophysics
GA 068XD
UT WOS:000313398600003
PM 22305965
OA Bronze
DA 2022-04-10
ER

PT J
AU Pham, V
   Pitti, R
   Tindell, CA
   Cheung, TK
   Masselot, A
   Stephan, JP
   Guler, GD
   Wilson, C
   Lill, J
   Arnott, D
   Classon, M
AF Pham, Victoria
   Pitti, Robert
   Tindell, Charles A.
   Cheung, Tommy K.
   Masselot, Alexandre
   Stephan, Jean-Phillipe
   Guler, Gulfem D.
   Wilson, Catherine
   Lill, Jennie
   Arnott, David
   Classon, Marie
TI Proteomic Analyses Identify a Novel Role for EZH2 in the Initiation of
   Cancer Cell Drug Tolerance
SO JOURNAL OF PROTEOME RESEARCH
LA English
DT Article
DE epigenetic; drug tolerance; EZH2; histone; chromatin; lysine
   methylation; cancer
ID HISTONE H3; IMMUNOAFFINITY ENRICHMENT; post-translational modification;
   METHYLTRANSFERASE; G9A; PHOSPHORYLATION; METHYLATION; COMPLEX; ATRX;
   IDENTIFICATION
AB Acquisition of drug resistance remains a chief impediment to successful cancer therapy, and we previously described a transient drug-tolerant cancer cell population (DTPs) whose survival is in part dependent on the activities of the histone methyltransferases G9a/EHMT2 and EZH2, the latter being the catalytic component of the polycomb repressive complex 2 (PRC2). Here, we apply multiple proteomic techniques to better understand the role of these histone methyltransferases (HMTs) in the establishment of the DTP state. Proteome-wide comparisons of lysine methylation patterns reveal that DTPs display an increase in methylation on K116 of PRC member Jarid2, an event that helps stabilize and recruit PRC2 to chromatin. We also find that EZH2, in addition to methylating histone H3K27, also can methylate G9a at K185, and that methylated G9a better recruits repressive complexes to chromatin. These complexes are similar to complexes recruited by histone H3 methylated at 1(9. Finally, a detailed histone post-translational modification analysis shows that EZH2, either directly or through its ability to methylate G9a, alters H3K9 methylation in the context of H3 serine 10 phosphorylation, primarily in a cancer cell subpopulation that serves as DTP precursors. We also show that combinations of histone PTMs recruit a different set of complexes to chromatin, shedding light on the temporal mechanism that contribute to drug tolerance.
C1 [Pham, Victoria; Cheung, Tommy K.; Masselot, Alexandre; Lill, Jennie; Arnott, David] Genentech Inc, Microchem Prote & Lipid, San Francisco, CA 94080 USA.
   [Pitti, Robert; Tindell, Charles A.; Guler, Gulfem D.; Wilson, Catherine; Classon, Marie] Genentech Inc, Discovery Oncol, San Francisco, CA 94080 USA.
   [Stephan, Jean-Phillipe] Genentech Inc, Prot Chem, San Francisco, CA 94080 USA.
RP Arnott, D (corresponding author), Genentech Inc, Microchem Prote & Lipid, San Francisco, CA 94080 USA.; Classon, M (corresponding author), Genentech Inc, Discovery Oncol, San Francisco, CA 94080 USA.
EM arnott@gene.com; dasson.marie@gmail.com
OI Arnott, David/0000-0002-7678-496X
CR Anania VG, 2014, MOL CELL PROTEOMICS, V13, P145, DOI 10.1074/mcp.M113.031062
   Bakalarski CE, 2008, J PROTEOME RES, V7, P4756, DOI 10.1021/pr800333e
   Binda O, 2010, epigenetic-US, V5, P767, DOI 10.4161/epi.5.8.13278
   Cao XJ, 2016, CURR PROTOC PROTEIN, V86
   Chang YQ, 2011, J MOL BIOL, V408, P807, DOI 10.1016/j.jmb.2011.03.018
   Chen CCL, 2018, GENOME RES, V28, P37, DOI 10.1101/gr.224717.117
   DIGNAM JD, 1983, NUCLEIC ACIDS RES, V11, P1475, DOI 10.1093/nar/11.5.1475
   Doll S, 2017, MOL CELL PROTEOMICS, V16, P39, DOI 10.1074/mcp.M116.063883
   Eberl HC, 2013, MOL CELL, V49, P368, DOI 10.1016/j.molcel.2012.10.026
   Elias JE, 2010, METHODS MOL BIOL, V604, P55, DOI 10.1007/978-1-60761-444-9_5
   Escamilla-Del-Arenal M, 2013, MOL CELL BIOL, V33, P5005, DOI 10.1128/MCB.00866-13
   Garcia BA, 2007, NAT PROTOC, V2, P933, DOI 10.1038/nprot.2007.106
   Giri S, 2015, ELIFE, V4, DOI 10.7554/eLife.06496
   Giri S, 2015, NUCLEUS-PHILA, V6, P435, DOI 10.1080/19491034.2015.1102814
   Grimes M, 2018, SCI SIGNAL, V11, DOI 10.1126/scisignal.aaq1087
   Gu HB, 2016, MOL CELL PROTEOMICS, V15, P692, DOI 10.1074/mcp.O115.052266
   Guler GD, 2017, CANCER CELL, V32, P221, DOI 10.1016/j.ccell.2017.07.002
   Guo AL, 2014, MOL CELL PROTEOMICS, V13, P372, DOI 10.1074/mcp.O113.027870
   Guo JP, 2019, NAT CELL BIOL, V21, P226, DOI 10.1038/s41556-018-0261-6
   Hinohara K, 2019, CANCER CELL, V35, P330, DOI 10.1016/j.ccell.2019.01.012
   Huang H, 2015, CHEM REV, V115, P2376, DOI 10.1021/cr500491u
   Iwase S, 2011, NAT STRUCT MOL BIOL, V18, P769, DOI 10.1038/nsmb.2062
   Jurkowska RZ, 2017, NAT COMMUN, V8, DOI 10.1038/s41467-017-02259-9
   Knutson SK, 2014, MOL CANCER THER, V13, P842, DOI 10.1158/1535-7163.MCT-13-0773
   Kunowska N, 2015, NUCLEIC ACIDS RES, V43, P1418, DOI 10.1093/nar/gku1350
   Lewis PW, 2010, P NATL ACAD SCI USA, V107, P14075, DOI 10.1073/pnas.1008850107
   Liu YQ, 2017, J MOL CELL BIOL, V9, P178, DOI 10.1093/jmcb/mjx013
   Lo WS, 2000, MOL CELL, V5, P917, DOI 10.1016/S1097-2765(00)80257-9
   Maier VK, 2015, MOL CELL PROTEOMICS, V14, P1435, DOI 10.1074/mcp.M114.044586
   Maile TM, 2015, MOL CELL PROTEOMICS, V14, P1148, DOI 10.1074/mcp.O114.046573
   Maksakova IA, 2013, EPIGENET CHROMATIN, V6, DOI 10.1186/1756-8935-6-15
   Mendez J, 2000, MOL CELL BIOL, V20, P8602, DOI 10.1128/MCB.20.22.8602-8612.2000
   Menon DR, 2015, ONCOGENE, V34, P4545, DOI 10.1038/onc.2014.432
   Noh KM, 2015, P NATL ACAD SCI USA, V112, P6820, DOI 10.1073/pnas.1411258112
   Peng JC, 2009, CELL, V139, P1290, DOI 10.1016/j.cell.2009.12.002
   Pham VC, 2014, METHOD ENZYMOL, V544, P359, DOI 10.1016/B978-0-12-417158-9.00014-5
   Raha D, 2014, CANCER RES, V74, P3579, DOI 10.1158/0008-5472.CAN-13-3456
   Rappsilber J, 2003, ANAL CHEM, V75, P663, DOI 10.1021/ac026117i
   Rathert P, 2008, NAT CHEM BIOL, V4, P344, DOI 10.1038/nchembio.88
   Roesch A, 2010, CELL, V141, P583, DOI 10.1016/j.cell.2010.04.020
   Rosnoblet C, 2011, BIOCHEM BIOPH RES CO, V413, P206, DOI 10.1016/j.bbrc.2011.08.059
   Rush J, 2005, NAT BIOTECHNOL, V23, P94, DOI 10.1038/nbt1046
   Sadic D, 2015, EMBO REP, V16, P836, DOI 10.15252/embr.201439937
   Sampath SC, 2007, MOL CELL, V27, P596, DOI 10.1016/j.molcel.2007.06.026
   Sanulli S, 2015, MOL CELL, V57, P769, DOI 10.1016/j.molcel.2014.12.020
   Sbirkov Y, 2017, INT J MOL SCI, V18, DOI 10.3390/ijms18071440
   Schultz DC, 2002, GENE DEV, V16, P919, DOI 10.1101/gad.973302
   Sharma SV, 2010, CELL, V141, P69, DOI 10.1016/j.cell.2010.02.027
   Shechter D, 2007, NAT PROTOC, V2, P1445, DOI 10.1038/nprot.2007.202
   Simon JM, 2015, J BIOL CHEM, V290, P26088, DOI 10.1074/jbc.M115.654459
   Svinkina T, 2015, MOL CELL PROTEOMICS, V14, P2429, DOI 10.1074/mcp.O114.047555
   Tchasovnikarova IA, 2015, SCIENCE, V348, P1481, DOI 10.1126/science.aaa7227
   Ueda J, 2006, J BIOL CHEM, V281, P20120, DOI 10.1074/jbc.M603087200
   Vedadi M, 2011, NAT CHEM BIOL, V7, P566, DOI [10.1038/NCHEMBIO.599, 10.1038/nchembio.599]
   Vermeulen M, 2010, CELL, V142, P967, DOI 10.1016/j.cell.2010.08.020
   Vinogradova M, 2016, NAT CHEM BIOL, V12, P531, DOI 10.1038/nchembio.2085
   Vire E, 2014, MOL CELL, V54, P203, DOI 10.1016/j.molcel.2014.03.041
   Wang C, 2011, J CELL SCI, V124, P4309, DOI 10.1242/jcs.092585
   Wysocka J, 2006, METHODS, V40, P339, DOI 10.1016/j.ymeth.2006.05.028
NR 59
TC 7
Z9 7
U1 4
U2 13
PU AMER CHEMICAL SOC
PI WASHINGTON
PA 1155 16TH ST, NW, WASHINGTON, DC 20036 USA
SN 1535-3893
EI 1535-3907
J9 J PROTEOME RES
JI J. Proteome Res.
PD APR 3
PY 2020
VL 19
IS 4
BP 1533
EP 1547
DI 10.1021/acs.jproteome.9b00773
PG 15
WC Biochemical Research Methods
WE Science Citation Index Expanded (SCI-EXPANDED)
SC Biochemistry & Molecular Biology
GA LD9HZ
UT WOS:000526337800017
PM 32159963
DA 2022-04-10
ER

PT S
AU Musat, M
   Vax, VV
   Borboli, N
   Gueorguiev, M
   Bonner, S
   Korbonits, M
   Grossman, AB
AF Musat, M
   Vax, VV
   Borboli, N
   Gueorguiev, M
   Bonner, S
   Korbonits, M
   Grossman, AB
BE Kontogeorgos, G
   Kovacs, K
TI Cell cycle dysregulation in pituitary oncogenesis
SO MOLECULAR PATHOLOGY OF THE PITUITARY
SE Frontiers of Hormone Research
LA English
DT Review
ID DEPENDENT-KINASE INHIBITOR; RETINOBLASTOMA SUSCEPTIBILITY GENE;
   GROWTH-FACTOR-BETA; SISTER-CHROMATID SEPARATION; ACTIVATED
   RECEPTOR-GAMMA; TUMOR-SUPPRESSOR PROTEIN; CDK INHIBITOR; TRANSCRIPTION
   FACTORS; prostate cancer; breast cancer
AB The cell cycle is the process by which cells grow, replicate their genome and divide. The cell cycle control system is a cyclically-operating biochemical device constructed from a set of interacting proteins that induce and coordinate proper progression through the cycle, and includes cyclins, cyclin-dependent kinases (CDK) and their inhibitor (CDKI). There are mainly two families of CDKI, the INK family (INK4a/p16; INK4b/p15; INK4c/p18 and fNK4d/p19) and the WAF/KIP family (WAF1/p21; KIP1/p27; KIP2/p57). Progression through the cell cycle is mainly dependent on fluctuations in the concentration of cyclins and CDKI achieved through the programmed degradation of these proteins by proteolysis within the ubiquitin-proteasome system. There is also a transcriptional regulation of cyclin expression, probably dependent on CDK phosphorylation. The p53 family - p53, p63 and p73 - function as transcription factor that play a major role in regulating the response of mammalian cells to stressors and damage, in part through the transcriptional activation of genes involved in cell cycle control (e.g. p21), DNA repair, senescence, angiogenesis and apoptosis. Essential for the maintenance of euploidy during mitosis is human securin, identical to the product of the pituitary tumour-transforming gene (PTTG). Loss of regulation at the G1/S transition appears to be a common event among virtually all types of human tumours. Aberrations of one or more components of the pRb/p16/cyclin D1/CDK4 pathway seem to be a frequent event (80%) in pituitary tumours. The role of p27 is rather that of a haploinsufficient gene. p27-/- mice show an increased growth rate, due to increased cellularity, testicular and ovarian cell hyperplasia and infertility, and hyperplasia of the pituitary intermediate lobe with nearly 100% mortality caused by such a benign pituitary tumour. Although the p27 gene was not found to be mutated in human pituitary tumours and its mRNA expression was similar in turnout samples in comparison with normal pituitaries, the load of p27 protein expression in corticotroph adenomas and pituitary carcinomas was shown to be much lower than those in normal pituitary tissue or other types of pituitary adenoma, suggesting that post-translational processing of p27 accelerates its removal from the nucleus. In respect to p27 degradation and its cellular compartmentalization, several pathway have been explored. Malignant tumours are associated with increased nuclear immunostaining for Jun-activation binding protein-1 (Jab1) which is responsible for phosphorylated p27 export from the nucleus. Corticotrophinomas are characterized by massively increased phosphorylation of p27 on Thr187, but are not associated with changes in Jab1. Macrophage inhibitory factor (MIF), which binds and inactivates Jab1, was noted to be over-expressed in tumours with abundant Jab 1, suggesting that it may be part of a compensatory mechanism to moderate Jab I activity. Proteasomal degradation of p27 requires its ubiquitination by the SCF ubiquitinationligase, with specific addressing by the F-box protein Skp2 and its co-factor Cks1. Pituitary tumours with high p27 protein expression showed significantly less Skp2 expression than samples with low p27 immunostaining, suggesting that increased Skp2 could play at least a part in this process. No difference was observed in Cks1 mRNA levels between normal pituitaries and pituitary adenomas. The present data suggest that inhibition of growth and tumour development is sensitive not only to the absolute levels of p27 protein
   but also to its cellular compartmentalization.
   Very recent findings from our group have established up-regulation of the serine-threonine kinase Akt in pituitary tumours compared to normal pituitary, which may cause phosphorylation of p27 on Thr157 and cytoplasmic retention of p27. PTTG protein is highly expressed in various human tumours, including pituitary tumours. While its mRNA levels are low in normal pituitary, increases in PTTG transcripts from more than 50% to more than 10-fold were recorded in the majority of a series of pituitary adenomas. Control of the cell cycle is a vital part of the cell's replication machinery. Disruption of this process is commonly seen in pituitary tumours and we are now beginning to identify regulatory elements which are likely to play a major role in pituitary oncogenesis. Copyright (C) 2004 S. Karger AG, Basel.
C1 Univ London St Bartholomews Hosp Med Coll, Dept Endocrinol, London EC1A 7BE, England.
   Carol Davila Univ Med & Pharm, Bucharest, Romania.
RP Grossman, AB (corresponding author), Univ London St Bartholomews Hosp Med Coll, Dept Endocrinol, London EC1A 7BE, England.
EM a.b.grossman@qmul.ac.uk
OI Korbonits, Marta/0000-0002-4101-9432
CR Akoulitchev S, 2000, NATURE, V407, P102, DOI 10.1038/35024111
   Alberts B., 2002, MOL BIOL CELL, P983
   Asa SL, 2002, NAT REV CANCER, V2, P836, DOI 10.1038/nrc926
   BALDIN V, 1993, GENE DEV, V7, P812, DOI 10.1101/gad.7.5.812
   Balint E, 2001, BRIT J CANCER, V85, P1813, DOI 10.1054/bjoc.2001.2128
   Bamberger CM, 1999, EUR J ENDOCRINOL, V140, P250, DOI 10.1530/eje.0.1400250
   Bates AS, 1997, J CLIN ENDOCR METAB, V82, P818, DOI 10.1210/jc.82.3.818
   Bloom J, 2003, SEMIN CANCER BIOL, V13, P41, DOI 10.1016/S1044-579X(02)00098-6
   Boehm M, 2002, EMBO J, V21, P3390, DOI 10.1093/emboj/cdf343
   Boehm M, 2001, CIRCULATION, V103, P2879, DOI 10.1161/01.CIR.103.24.2879
   Bosco G, 2001, NAT CELL BIOL, V3, P289, DOI 10.1038/35060086
   BREMNER R, 1995, MOL CELL BIOL, V15, P3256
   Buckley N, 1995, J Clin Endocrinol Metab, V80, P692, DOI 10.1210/jc.80.2.4
   Carneiro C, 2003, ONCOGENE, V22, P361, DOI 10.1038/sj.onc.1206163
   Ceha HM, 1998, BIOCHEM BIOPH RES CO, V249, P550, DOI 10.1006/bbrc.1998.9183
   Chamovitz DA, 2001, EMBO REP, V2, P96, DOI 10.1093/embo-reports/kve028
   Cheng MG, 1999, EMBO J, V18, P1571, DOI 10.1093/emboj/18.6.1571
   Claret FX, 1996, NATURE, V383, P453, DOI 10.1038/383453a0
   Clurman BE, 1998, P NATL ACAD SCI USA, V95, P15158, DOI 10.1073/pnas.95.26.15158
   Coqueret O, 2003, TRENDS CELL BIOL, V13, P65, DOI 10.1016/S0962-8924(02)00043-0
   Craig C, 1997, ONCOGENE, V14, P2283, DOI 10.1038/sj.onc.1201064
   Cress WD, 2000, J CELL PHYSIOL, V184, P1, DOI 10.1002/(SICI)1097-4652(200007)184:1<1::AID-JCP1>3.0.CO;2-7
   Dahia PLM, 1998, ONCOGENE, V16, P69, DOI 10.1038/sj.onc.1201516
   DENG CX, 1995, CELL, V82, P675, DOI 10.1016/0092-8674(95)90039-X
   Donnellan R, 1998, J CLIN PATHOL-MOL PA, V51, P1
   Farrell WE, 2000, FRONT NEUROENDOCRIN, V21, P174, DOI 10.1006/frne.1999.0195
   Fero ML, 1996, CELL, V85, P733, DOI 10.1016/S0092-8674(00)81239-8
   FISHER RP, 1994, CELL, V78, P713, DOI 10.1016/0092-8674(94)90535-5
   Franklin DS, 2000, MOL CELL BIOL, V20, P6147, DOI 10.1128/MCB.20.16.6147-6158.2000
   Franklin DS, 1998, GENE DEV, V12, P2899, DOI 10.1101/gad.12.18.2899
   Frost SJ, 1999, MOL ENDOCRINOL, V13, P1801, DOI 10.1210/me.13.11.1801
   Fujita N, 2002, J BIOL CHEM, V277, P28706, DOI 10.1074/jbc.M203668200
   Graff JR, 2000, J BIOL CHEM, V275, P24500, DOI 10.1074/jbc.M003145200
   HANNON GJ, 1994, NATURE, V371, P257, DOI 10.1038/371257a0
   Hara T, 2001, J BIOL CHEM, V276, P48937, DOI 10.1074/jbc.M107274200
   Harper JW, 1997, CANCER SURV, V29, P91
   Hatta Y, 1997, LEUKEMIA, V11, P984, DOI 10.1038/sj.leu.2400686
   Heaney AP, 2002, NAT MED, V8, P1281, DOI 10.1038/nm784
   Heaney AP, 2003, J CLIN INVEST, V111, P1381, DOI 10.1172/JCI200316575
   HERMAN V, 1993, J CLIN ENDOCR METAB, V77, P50, DOI 10.1210/jcem.77.1.8100831
   Hibberts NA, 1999, CLIN CANCER RES, V5, P2133
   Hickman ES, 2002, CURR OPIN GENET DEV, V12, P60, DOI 10.1016/S0959-437X(01)00265-9
   HOLLSTEIN M, 1991, SCIENCE, V253, P49, DOI 10.1126/science.1905840
   HU NP, 1994, ONCOGENE, V9, P1021
   Huang S, 1998, MOL BIOL CELL, V9, P3179, DOI 10.1091/mbc.9.11.3179
   Irwin MS, 2001, CELL GROWTH DIFFER, V12, P337
   ISSEMANN I, 1990, NATURE, V347, P645, DOI 10.1038/347645a0
   JACKS T, 1992, NATURE, V359, P295, DOI 10.1038/359295a0
   JEFFREY PD, 1995, NATURE, V376, P313, DOI 10.1038/376313a0
   Kakar SS, 1999, CYTOGENET CELL GENET, V84, P211, DOI 10.1159/000015261
   Kakar SS, 2001, J HISTOCHEM CYTOCHEM, V49, P1537, DOI 10.1177/002215540104901207
   KAMB A, 1994, SCIENCE, V264, P436, DOI 10.1126/science.8153634
   Katayose Y, 1997, CANCER RES, V57, P5441
   Kato A, 1997, J BIOL CHEM, V272, P8065, DOI 10.1074/jbc.272.12.8065
   Kawada M, 1997, ONCOGENE, V15, P629, DOI 10.1038/sj.onc.1201228
   Kefford R, 2002, LANCET ONCOL, V3, P653, DOI 10.1016/S1470-2045(02)00894-X
   Kerbel R S, 1996, Hum Cell, V9, P257
   Kibel AS, 1999, GENE CHROMOSOME CANC, V25, P270, DOI 10.1002/(SICI)1098-2264(199907)25:3<270::AID-GCC9>3.3.CO;2-Q
   KLIEWER SA, 1992, NATURE, V358, P771, DOI 10.1038/358771a0
   KNUDSON AG, 1971, P NATL ACAD SCI USA, V68, P820, DOI 10.1073/pnas.68.4.820
   KOBAYASHI H, 1994, BLOOD, V84, P3473
   Koepp DM, 2001, SCIENCE, V294, P173, DOI 10.1126/science.1065203
   Korbonits M, 2002, J CLIN ENDOCR METAB, V87, P2635, DOI 10.1210/jc.87.6.2635
   Kullmann M, 2002, GENE DEV, V16, P3087, DOI 10.1101/gad.248902
   LEE WH, 1987, SCIENCE, V235, P1394, DOI 10.1126/science.3823889
   LEE WH, 1987, NATURE, V329, P642, DOI 10.1038/329642a0
   Levkau B, 1998, MOL CELL, V1, P553, DOI 10.1016/S1097-2765(00)80055-6
   Levrero M, 2000, J CELL SCI, V113, P1661
   LEVY A, 1994, CLIN ENDOCRINOL, V41, P809, DOI 10.1111/j.1365-2265.1994.tb02797.x
   Liang J, 2002, NAT MED, V8, P1153, DOI 10.1038/nm761
   Lidhar K, 1999, J CLIN ENDOCR METAB, V84, P3823, DOI 10.1210/jc.84.10.3823
   Lipinski MM, 1999, ONCOGENE, V18, P7873, DOI 10.1038/sj.onc.1203244
   Lipinski MM, 2001, EMBO J, V20, P3402, DOI 10.1093/emboj/20.13.3402
   Mal A, 1996, NATURE, V380, P262, DOI 10.1038/380262a0
   Malek NP, 2001, NATURE, V413, P323, DOI 10.1038/35095083
   Mamillapalli R, 2001, CURR BIOL, V11, P263, DOI 10.1016/S0960-9822(01)00065-3
   Marti A, 1999, NAT CELL BIOL, V1, P14, DOI 10.1038/8984
   MAYOL X, 1993, ONCOGENE, V8, P2561
   Medema RH, 2000, NATURE, V404, P782, DOI 10.1038/35008115
   Melino G, 2002, NAT REV CANCER, V2, P605, DOI 10.1038/nrc861
   Millard SS, 2000, MOL CELL BIOL, V20, P5947, DOI 10.1128/MCB.20.16.5947-5959.2000
   Moberg K, 1996, MOL CELL BIOL, V16, P1436
   Moberg KH, 2001, NATURE, V413, P311, DOI 10.1038/35095068
   Montagnoli A, 1999, GENE DEV, V13, P1181, DOI 10.1101/gad.13.9.1181
   Morgan DO, 1997, ANNU REV CELL DEV BI, V13, P261, DOI 10.1146/annurev.cellbio.13.1.261
   Morris EJ, 2001, ADV CANCER RES, V82, P1, DOI 10.1016/S0065-230X(01)82001-7
   Motomura W, 2000, CANCER RES, V60, P5558
   Muller D, 2000, EMBO J, V19, P2168, DOI 10.1093/emboj/19.10.2168
   Muratani M, 2003, NAT REV MOL CELL BIO, V4, P192, DOI 10.1038/nrm1049
   MUSAT M, 2003, ENDO
   Musat Madalina, 2002, Pituitary, V5, P235, DOI 10.1023/A:1025325832698
   Nakayama K, 1998, BIOESSAYS, V20, P1020, DOI 10.1002/(SICI)1521-1878(199812)20:12<1020::AID-BIES8>3.0.CO;2-D
   Nakayama K, 2001, BIOCHEM BIOPH RES CO, V282, P853, DOI 10.1006/bbrc.2001.4627
   Narla G, 2001, SCIENCE, V294, P2563, DOI 10.1126/science.1066326
   Nguyen H, 1999, MOL CELL BIOL, V19, P1190
   Paggi MG, 1996, J CELL BIOCHEM, V62, P418
   Park MS, 1999, P NATL ACAD SCI USA, V96, P6382, DOI 10.1073/pnas.96.11.6382
   Pavletich NP, 1999, J MOL BIOL, V287, P821, DOI 10.1006/jmbi.1999.2640
   PEI L, 1995, CANCER RES, V55, P1613
   Philipp-Staheli J, 2001, EXP CELL RES, V264, P148, DOI 10.1006/excr.2000.5143
   PIETENPOL JA, 1995, CANCER RES, V55, P1206
   PINES J, 1989, CELL, V58, P833, DOI 10.1016/0092-8674(89)90936-7
   POLYAK K, 1994, GENE DEV, V8, P9, DOI 10.1101/gad.8.1.9
   Pyle ME, 2003, J ENDOCRINOL, V176, P103, DOI 10.1677/joe.0.1760103
   Qian X, 1998, AM J PATHOL, V153, P1475, DOI 10.1016/S0002-9440(10)65735-5
   Qian X, 1996, ENDOCRINOLOGY, V137, P3051, DOI 10.1210/en.137.7.3051
   Reed AL, 1996, CANCER RES, V56, P3630
   REEI SI, 2002, NAT CELL BIOL, V4, pE199
   REEVES HL, 2003, ASS PHYS ANN GEN M
   Ruebel KH, 2001, ENDOCR PATHOL, V12, P281, DOI 10.1385/EP:12:3:281
   Russell SJ, 1999, MOL CELL, V3, P687, DOI 10.1016/S1097-2765(01)80001-0
   Russo AA, 1996, NATURE, V382, P325, DOI 10.1038/382325a0
   SALA A, 1994, CANCER RES, V54, P1402
   Scheffner M, 1999, NATURE, V398, P103, DOI 10.1038/18105
   Schoonjans K, 1997, CURR OPIN LIPIDOL, V8, P159, DOI 10.1097/00041433-199706000-00006
   Schuchner S, 1999, J VIROL, V73, P9266
   Serrano M, 1996, CELL, V85, P27, DOI 10.1016/S0092-8674(00)81079-X
   SERRANO M, 1993, NATURE, V366, P704, DOI 10.1038/366704a0
   Sgambato A, 2000, J CELL PHYSIOL, V183, P18, DOI 10.1002/(SICI)1097-4652(200004)183:1<18::AID-JCP3>3.0.CO;2-S
   Sheaff RJ, 1997, GENE DEV, V11, P1464, DOI 10.1101/gad.11.11.1464
   SHERR CJ, 1995, GENE DEV, V9, P1149, DOI 10.1101/gad.9.10.1149
   Sherr CJ, 1999, GENE DEV, V13, P1501, DOI 10.1101/gad.13.12.1501
   Shimada Y, 2000, NAT CELL BIOL, V2, P117, DOI 10.1038/35000073
   Shin I, 2002, NAT MED, V8, P1145, DOI 10.1038/nm759
   Shirane M, 1999, J BIOL CHEM, V274, P13886, DOI 10.1074/jbc.274.20.13886
   Simpson DJ, 1999, CANCER RES, V59, P1562
   Simpson DJ, 1999, GENE CHROMOSOME CANC, V24, P328
   Simpson DJ, 2001, CARCINOGENESIS, V22, P1149, DOI 10.1093/carcin/22.8.1149
   Simpson DJ, 2000, CANCER RES, V60, P1211
   SLINGERLAND JM, 1994, MOL CELL BIOL, V14, P3683, DOI 10.1128/MCB.14.6.3683
   Sotillo R, 2001, EMBO J, V20, P6637, DOI 10.1093/emboj/20.23.6637
   Soucek T, 1998, P NATL ACAD SCI USA, V95, P15653, DOI 10.1073/pnas.95.26.15653
   Soufir N, 1998, HUM MOL GENET, V7, P209, DOI 10.1093/hmg/7.2.209
   Spence J, 2000, CELL, V102, P67, DOI 10.1016/S0092-8674(00)00011-8
   St Croix B, 1998, J CELL BIOL, V142, P557, DOI 10.1083/jcb.142.2.557
   Strohmaier H, 2001, NATURE, V413, P316, DOI 10.1038/35095076
   Sugimura A, 1999, BIOCHEM BIOPH RES CO, V261, P833, DOI 10.1006/bbrc.1999.1049
   Swanson C, 2000, P NATL ACAD SCI USA, V97, P7796, DOI 10.1073/pnas.97.14.7796
   TAKEUCHI S, 1995, CANCER RES, V55, P5377
   Tanaka C, 1997, J CLIN ENDOCR METAB, V82, P3141, DOI 10.1210/jc.82.9.3141
   Terrell J, 1998, MOL CELL, V1, P193, DOI 10.1016/S1097-2765(00)80020-9
   Tomoda K, 1999, NATURE, V398, P160, DOI 10.1038/18230
   Trapasso F, 2000, MOL CELL BIOL, V20, P9236, DOI 10.1128/MCB.20.24.9236-9246.2000
   Uhlmann F, 1999, NATURE, V400, P37, DOI 10.1038/21831
   Varshavsky A, 1997, TRENDS BIOCHEM SCI, V22, P383, DOI 10.1016/S0968-0004(97)01122-5
   Vax VV, 2003, J ENDOCRINOL, V178, P301, DOI 10.1677/joe.0.1780301
   Vax VV, 2003, ENDOCR-RELAT CANCER, V10, P397, DOI 10.1677/erc.0.0100397
   Vidal A, 2000, GENE, V247, P1, DOI 10.1016/S0378-1119(00)00092-5
   Viglietto G, 2002, NAT MED, V8, P1136, DOI 10.1038/nm762
   Vlach J, 1997, EMBO J, V16, P5334, DOI 10.1093/emboj/16.17.5334
   Vousden KH, 2002, NAT REV CANCER, V2, P594, DOI 10.1038/nrc864
   Wakino S, 2000, J BIOL CHEM, V275, P22435, DOI 10.1074/jbc.M910452199
   WEINBERG RA, 1995, CELL, V81, P323, DOI 10.1016/0092-8674(95)90385-2
   WEINTRAUB SJ, 1992, NATURE, V358, P259, DOI 10.1038/358259a0
   WOLFEL T, 1995, SCIENCE, V269, P1281, DOI 10.1126/science.7652577
   Woloschak M, 1997, MOL CARCINOGEN, V19, P221, DOI 10.1002/(SICI)1098-2744(199708)19:4<221::AID-MC1>3.0.CO;2-F
   Yam CH, 1999, MOL CELL BIOL, V19, P635
   Yang A, 2000, NAT REV MOL CELL BIO, V1, P199, DOI 10.1038/35043127
   Yang HY, 2000, J BIOL CHEM, V275, P24735, DOI 10.1074/jbc.C000147200
   YEUNG RS, 1993, ONCOGENE, V8, P3465
   Yu ZK, 1998, P NATL ACAD SCI USA, V95, P11324, DOI 10.1073/pnas.95.19.11324
   ZerfassThome K, 1996, ONCOGENE, V13, P2323
   Zhang PM, 1997, NATURE, V387, P151, DOI 10.1038/387151a0
   Zhang X, 1999, J CLIN ENDOCR METAB, V84, P761, DOI 10.1210/jc.84.2.761
   Zhong WW, 2003, NATURE, V423, P885, DOI 10.1038/nature01747
   ZHU L, 1993, GENE DEV, V7, P1111, DOI 10.1101/gad.7.7a.1111
   ZHU LG, 1995, MOL CELL BIOL, V15, P3552
   Zou H, 1999, SCIENCE, V285, P418, DOI 10.1126/science.285.5426.418
NR 168
TC 51
Z9 52
U1 0
U2 6
PU KARGER
PI BASEL
PA POSTFACH, CH-4009 BASEL, SWITZERLAND
SN 0301-3073
EI 1662-3762
BN 3-8055-7740-0
J9 FRONT HORM RES
JI Front.Horm.Res.
PY 2004
VL 32
BP 34
EP 62
PG 29
WC Endocrinology & Metabolism
WE Science Citation Index Expanded (SCI-EXPANDED)
SC Endocrinology & Metabolism
GA BAM39
UT WOS:000222824600003
PM 15281339
DA 2022-04-10
ER

PT J
AU van Roosmalen, IAM
   Quax, WJ
   Kruyt, FAE
AF van Roosmalen, Ingrid A. M.
   Quax, Wim J.
   Kruyt, Frank A. E.
TI Two death-inducing human TRAIL receptors to target in cancer: Similar or
   distinct regulation and function?
SO BIOCHEMICAL PHARMACOLOGY
LA English
DT Article
DE TRAIL; DR4; DR5; Receptor preference; Apoptosis
ID RETRACTED ARTICLE. SEE; TUMOR-CELL SENSITIVITY; UP-REGULATION;
   MONOCLONAL-ANTIBODY; INDUCED APOPTOSIS; IN-VIVO; ENHANCED APOPTOSIS;
   MEDIATED APOPTOSIS; SELECTIVE MUTANTS; AGONIST ANTIBODY
AB The emergence during evolution of two tumour necrosis factor (TNF)-related apoptosis-inducing ligand (TRAIL) receptors, receptor-1/DR4 and -2/DR5, able to induce apoptosis has raised the question whether they differ in function and regulation, which is of key importance for selecting either DR4 or DR5 selective pro-apoptotic agents for cancer treatment. In this review we found practically no information regarding possible differences in DR4 and DR5 function based on structural differences. On the other hand, a panel of different DR4 or DR5 selective pro-apoptotic agonists have been developed that were explored for efficacy in different tumour types in a large number of studies. Leukemic cells appear mainly sensitive for DR4-induced apoptosis, contrasting the situation in other tumour types that show heterogeneity in receptor preference and, in some cases, a slight overall preference for DR5. Both receptors were found to mediate intracellular stress-induced apoptosis, although this is most frequently reported for DR5. Interestingly, DR5 was also found to transmit non-apoptotic signalling in resistant tumour cells and recently nuclear localization and a role in microRNA maturation has been described. DR4 expression is most heavily regulated by promoter methylation, intracellular trafficking and post-translational modification. DR5 expression is predominantly regulated at the transcriptional level, which may reflect its ability to respond to cellular stressors. It will be important to further increase our understanding of the mechanism determining TRAIL receptor preference in order to select the appropriate TRAIL receptor selective agonists for therapy, and to develop novel strategies to enhance apoptosis activation in tumours. (C) 2014 Elsevier Inc. All rights reserved.
C1 [van Roosmalen, Ingrid A. M.; Kruyt, Frank A. E.] Univ Groningen, Univ Med Ctr Groningen, Dept Med Oncol, NL-9713 GZ Groningen, Netherlands.
   [van Roosmalen, Ingrid A. M.; Quax, Wim J.] Univ Groningen, Groningen Res Inst Pharm, Dept Pharmaceut Biol, NL-9713 AV Groningen, Netherlands.
RP Kruyt, FAE (corresponding author), Univ Groningen, Univ Med Ctr Groningen, Dept Med Oncol, NL-9713 GZ Groningen, Netherlands.
EM f.a.e.kruyt@umcg.nl
RI Quax, Wim/O-2875-2019; Quax, Wim/K-2802-2012
OI Quax, Wim/0000-0002-5162-9947; Quax, Wim/0000-0002-5162-9947; Kruyt,
   Frank/0000-0002-2445-9380
FU Ubbo Emmius Foundation of the University of Groningen; Dutch Cancer
   SocietyKWF Kankerbestrijding [RUG2011-5211]
FX This research was funded by the Ubbo Emmius Foundation of the University
   of Groningen and by Grant RUG2011-5211 from the Dutch Cancer Society.
CR Abdulghani J, 2013, PLOS ONE, V8, DOI 10.1371/journal.pone.0075414
   Abhari BA, 2013, ONCOGENE, V32, P3263, DOI 10.1038/onc.2012.337
   Adams C, 2008, CELL DEATH DIFFER, V15, P751, DOI 10.1038/sj.cdd.4402306
   Azijli K, 2012, J CELL SCI, V125, P4651, DOI 10.1242/jcs.109587
   Bae SI, 2008, ONCOGENE, V27, P490, DOI 10.1038/sj.onc.1210655
   Baritaki S, 2008, J IMMUNOL, V180, P6199, DOI 10.4049/jimmunol.180.9.6199
   Baritaki S, 2007, J IMMUNOL, V179, P5441, DOI 10.4049/jimmunol.179.8.5441
   Baritaki S, 2007, MOL CANCER THER, V6, P1387, DOI 10.1158/1535-7163.MCT-06-0521
   Belyanskaya LL, 2007, MOL CANCER, V6, DOI 10.1186/1476-4598-6-66
   Chiron D, 2009, J IMMUNOL, V183, P4371, DOI 10.4049/jimmunol.0901436
   Chuntharapai A, 2001, J IMMUNOL, V166, P4891, DOI 10.4049/jimmunol.166.8.4891
   den Hollander MW, 2013, CANCER LETT, V332, P194, DOI 10.1016/j.canlet.2012.04.007
   Deng ZF, 2012, PLOS ONE, V7, DOI 10.1371/journal.pone.0037700
   Dereeper A, 2010, BMC EVOL BIOL, V10, DOI 10.1186/1471-2148-10-8
   Duiker EW, 2009, CLIN CANCER RES, V15, P2048, DOI 10.1158/1078-0432.CCR-08-1535
   Elias A, 2009, CLIN CANCER RES, V15, P5457, DOI 10.1158/1078-0432.CCR-09-1125
   Gasparian ME, 2009, APOPTOSIS, V14, P778, DOI 10.1007/s10495-009-0349-3
   Georgakis GV, 2005, BRIT J HAEMATOL, V130, P501, DOI 10.1111/j.1365-2141.2005.05656.x
   Gong J, 2006, MOL CANCER THER, V5, P2991, DOI 10.1158/1535-7163.MCT-06-0188
   Griffith TS, 1999, J IMMUNOL, V162, P2597
   Haselmann V, 2014, GASTROENTEROLOGY, V146, P278, DOI 10.1053/j.gastro.2013.10.009
   Higuchi H, 2004, J BIOL CHEM, V279, P51, DOI 10.1074/jbc.M309476200
   Horak P, 2005, MOL CANCER RES, V3, P335, DOI 10.1158/1541-7786.MCR-04-0136
   Hymowitz SG, 2000, BIOCHEMISTRY-US, V39, P633, DOI 10.1021/bi992242l
   Hymowitz SG, 1999, MOL CELL, V4, P563, DOI 10.1016/S1097-2765(00)80207-5
   Ichikawa K, 2001, NAT MED, V7, P954, DOI 10.1038/91000
   Ichikawa K, 2003, J IMMUNOL, V171, P1061, DOI 10.4049/jimmunol.171.2.1061
   Jin HO, 2014, BIOCHEM BIOPH RES CO, V444, P502, DOI 10.1016/j.bbrc.2014.01.086
   Kang CH, 2011, TOXICOL IN VITRO, V25, P605, DOI 10.1016/j.tiv.2010.12.006
   Kaplan-Lefko PJ, 2010, CANCER BIOL THER, V9, P618, DOI 10.4161/cbt.9.8.11264
   Kelley RF, 2005, J BIOL CHEM, V280, P2205, DOI 10.1074/jbc.M410660200
   Kelley SK, 2004, CURR OPIN PHARMACOL, V4, P333, DOI 10.1016/j.coph.2004.02.006
   Kurita S, 2010, ONCOGENE, V29, P4848, DOI 10.1038/onc.2010.235
   Lemke J, 2010, J MOL MED, V88, P729, DOI 10.1007/s00109-010-0619-0
   Li J, 2008, DRUG DEVELOP RES, V69, P69, DOI 10.1002/ddr.20229
   Li Y, 2006, CANCER RES, V66, P8520, DOI 10.1158/0008-5472.CAN-05-4364
   Lin TT, 2013, PLOS ONE, V8, DOI 10.1371/journal.pone.0063966
   Lu M, 2014, SCIENCE, V345, P98, DOI 10.1126/science.1254312
   Luster TA, 2009, MOL CANCER THER, V8, P292, DOI 10.1158/1535-7163.MCT-08-0918
   MacFarlane M, 2005, CANCER RES, V65, P11265, DOI 10.1158/0008-5472.CAN-05-2801
   MacFarlane M, 2005, CELL DEATH DIFFER, V12, P773, DOI 10.1038/sj.cdd.4401649
   Maddipatla S, 2007, CLIN CANCER RES, V13, P4556, DOI 10.1158/1078-0432.CCR-07-0680
   Mahalingam D, 2009, CANCER TREAT REV, V35, P280, DOI 10.1016/j.ctrv.2008.11.006
   Marini P, 2006, ONCOGENE, V25, P5145, DOI 10.1038/sj.onc.1209516
   Martinez-Paniagua MA, 2011, CELL CYCLE, V10, P2792, DOI 10.4161/cc.10.16.16952
   Menoret E, 2006, BLOOD, V108, P1346, DOI 10.1182/blood-2005-12-007971
   Moon DO, 2010, MOL CANCER THER, V9, P1583, DOI 10.1158/1535-7163.MCT-09-0942
   Motoki K, 2005, CLIN CANCER RES, V11, P3126, DOI 10.1158/1078-0432.CCR-04-1867
   Natoni A, 2007, BRIT J HAEMATOL, V139, P568, DOI 10.1111/j.1365-2141.2007.06852.x
   Neumann S, 2012, PLOS ONE, V7, DOI 10.1371/journal.pone.0042526
   Niyazi M, 2009, STRAHLENTHER ONKOL, V185, P8, DOI 10.1007/s00066-009-1856-4
   Oh Y, 2012, CELL DEATH DIFFER, V19, P1196, DOI 10.1038/cdd.2011.209
   Ohtsuka T, 2003, ONCOGENE, V22, P2034, DOI 10.1038/sj.onc.1206290
   Oliver PG, 2012, BREAST CANCER RES TR, V133, P417, DOI 10.1007/s10549-011-1755-0
   Pasquini L, 2010, INT J ONCOL, V36, P707, DOI 10.3892/ijo_00000546
   Pennarun B, 2010, BBA-REV CANCER, V1805, P123, DOI 10.1016/j.bbcan.2009.11.004
   Picarda G, 2012, MOL CANCER RES, V10, P336, DOI 10.1158/1541-7786.MCR-11-0390
   Pitt RM, 1996, J BIOL CHEM, V271, P12687, DOI 10.1074/jbc.271.22.12687
   Portanova P, 2013, INT J ONCOL, V43, P121, DOI 10.3892/ijo.2013.1945
   Pukac L, 2005, BRIT J CANCER, V92, P1430, DOI 10.1038/sj.bjc.6602487
   Razumilava N, 2012, HEPATOLOGY, V55, P465, DOI 10.1002/hep.24698
   Reis CR, 2010, CELL DEATH DIS, V1, DOI 10.1038/cddis.2010.61
   Reis CR, 2011, MOL CELL PROTEOMICS, V10, DOI 10.1074/mcp.M110.002808
   Ren YG, 2004, MOL BIOL CELL, V15, P5064, DOI 10.1091/mbc.E04-03-0184
   Rossin A, 2009, BIOCHEM J, V419, P185, DOI 10.1042/BJ20081212
   Shoeb M, 2013, FREE RADICAL BIO MED, V63, P280, DOI 10.1016/j.freeradbiomed.2013.05.039
   Simova S, 2008, APOPTOSIS, V13, P423, DOI 10.1007/s10495-007-0171-8
   Smith MR, 2007, CLIN CANCER RES, V13, p5528S, DOI 10.1158/1078-0432.CCR-07-0982
   Song JH, 2007, CANCER RES, V67, P6946, DOI 10.1158/0008-5472.CAN-06-3896
   Stadel D, 2010, CLIN CANCER RES, V16, P5734, DOI 10.1158/1078-0432.CCR-10-0985
   Stegehuis JH, 2010, DRUG RESIST UPDATE, V13, P2, DOI 10.1016/j.drup.2009.11.001
   Sun M, 2008, CELL DEATH DIFFER, V15, P1887, DOI 10.1038/cdd.2008.124
   Szegezdi E, 2012, MOL CELL PROTEOMICS, V11, DOI 10.1074/mcp.M111.013730
   Szegezdi E, 2011, J CELL MOL MED, V15, P2216, DOI 10.1111/j.1582-4934.2010.01211.x
   Tang Z, 2006, MOL CELL BIOL, V26, P5588, DOI 10.1128/MCB.00199-06
   Tur V, 2008, J BIOL CHEM, V283, P20560, DOI 10.1074/jbc.M800457200
   van de Kooij B, 2013, J BIOL CHEM, V288, P6617, DOI 10.1074/jbc.M112.448209
   Van der Sloot AM, 2006, P NATL ACAD SCI USA, V103, P8634, DOI 10.1073/pnas.0510187103
   van Geelen CMM, 2011, BMC CANCER, V11, DOI 10.1186/1471-2407-11-39
   Vega MI, 2011, LEUKEMIA LYMPHOMA, V52, P108, DOI 10.3109/10428194.2010.531408
   Wagner KW, 2007, NAT MED, V13, P1070, DOI 10.1038/nm1627
   Wang TTY, 2000, BREAST CANCER RES TR, V61, P87, DOI 10.1023/A:1006432201432
   Wiezorek J, 2010, CLIN CANCER RES, V16, P1701, DOI 10.1158/1078-0432.CCR-09-1692
   Xiao WY, 2011, LEUKEMIA LYMPHOMA, V52, P1290, DOI 10.3109/10428194.2011.567317
   Yada A, 2008, ANN ONCOL, V19, P1060, DOI 10.1093/annonc/mdn015
   Yoshida T, 2007, ONCOL REP, V18, P1239
   Zhou LL, 2011, CANCER BIOL THER, V12, P335, DOI 10.4161/cbt.12.4.17174
NR 87
TC 44
Z9 44
U1 0
U2 21
PU PERGAMON-ELSEVIER SCIENCE LTD
PI OXFORD
PA THE BOULEVARD, LANGFORD LANE, KIDLINGTON, OXFORD OX5 1GB, ENGLAND
SN 0006-2952
EI 1873-2968
J9 BIOCHEM PHARMACOL
JI Biochem. Pharmacol.
PD OCT 15
PY 2014
VL 91
IS 4
BP 447
EP 456
DI 10.1016/j.bcp.2014.08.010
PG 10
WC Pharmacology & Pharmacy
WE Science Citation Index Expanded (SCI-EXPANDED)
SC Pharmacology & Pharmacy
GA AQ2ZB
UT WOS:000342657400004
PM 25150214
DA 2022-04-10
ER

PT J
AU Zhao, J
   Zou, LX
   Li, Y
   Liu, XF
   Zeng, C
   Xu, C
   Jiang, B
   Guo, XJ
   Song, XF
AF Zhao, Jian
   Zou, Lingxiao
   Li, Yan
   Liu, Xiaofei
   Zeng, Cong
   Xu, Chen
   Jiang, Bin
   Guo, Xuejiang
   Song, Xiaofeng
TI HisPhosSite: A comprehensive database of histidine phosphorylated
   proteins and sites
SO JOURNAL OF PROTEOMICS
LA English
DT Article
DE Post-translational modification; Phosphorylation; Histidine
   phosphorylation; Phosphohistidine site; Database
ID signal transduction; KINASES; TOOLS
AB Histidine phosphorylation is critically important in a variety of cellular processes including signal transduction, cell cycle, proliferation, differentiation, and apoptosis. It is estimated to account for 6% of all phosphorylated amino acids. However, due to the acid lability of the P-N bond, the study of pHis lags far behind that of pSer, pThr, and pTyr. Recently, the development and use of pHis-specific antibodies and methodologies have led to a resurgence in the study of histidine phosphorylation. Although a considerable number of pHis proteins and sites have been discovered, most of them have not been manually curated and integrated to any databases. There is a lack of a data repository for pHis, and such work is expected to help further systemic studies of pHis. Thus, we present a comprehensive resource database of histidine phosphorylation (HisPhosSite) by curating experimentally validated pHis proteins and sites and compiling putative pHis sites with ortholog search. HisPhosSite contains 776 verified pHis sites and 2702 verified pHis proteins in 38 eukaryotic and prokaryotic species and 15,378 putative pHis sites and 10,816 putative pHis proteins in 1366 species. HisPhosSite provides rich annotations of pHis sites and proteins and multiple search engines (including motif search and BLAST search) for users to locate pHis sites of interest. HisPhosSite is available at http://reprod.njmu.edu.cn/hisphossite.
   Significance: Histidine phosphorylation is involved in a variety of cellular processes as well as cancers, and it has been proved to be more common than previously thought. The HisPhosSite database was developed to collect pHis data from published literatures with experimental evidences. Unification of the identified pHis proteins and sites will give researchers an informative resource for histidine phosphorylation. HisPhosSite has a user-friendly interface with multiple search engines for users to locate pHis sites of interest. In addition, the database provides rich structural and functional annotations. HisPhosSite will help future studies and elucidation of the functions of histidine phosphorylation.
C1 [Zhao, Jian; Zou, Lingxiao; Zeng, Cong; Song, Xiaofeng] Nanjing Univ Aeronaut & Astronaut, Dept Biomed Engn, Nanjing 210016, Peoples R China.
   [Li, Yan; Liu, Xiaofei; Xu, Chen; Guo, Xuejiang] Nanjing Med Univ, Dept Histol & Embryol, State Key Lab Reprod Med, Nanjing 211166, Jiangsu, Peoples R China.
   [Li, Yan] Nanjing Med Univ, Sir Run Run Hosp, Ctr Pathol & Clin Lab, Nanjing 211166, Peoples R China.
   [Jiang, Bin] Nanjing Univ Aeronaut & Astronaut, Coll Automat Engn, Nanjing 211106, Peoples R China.
RP Song, XF (corresponding author), Nanjing Univ Aeronaut & Astronaut, Dept Biomed Engn, Nanjing 210016, Peoples R China.; Guo, XJ (corresponding author), Nanjing Med Univ, Dept Histol & Embryol, State Key Lab Reprod Med, Nanjing 211166, Jiangsu, Peoples R China.
EM guo.xuejiang@njum.edu.cn; xfsong@nuaa.edu.cn
FU National Key RD Program [2016YFA0503300]; China Postdoctoral Science
   FoundationChina Postdoctoral Science Foundation [2019M661817]; National
   Natural Science Foundation of ChinaNational Natural Science Foundation
   of China (NSFC) [61973155, 62003165, 81771641, 81971439, 82001611];
   Program for Distinguished Talents of Six Domains in Jiangsu Province
   [YY-019]; Fok Ying Tung Education FoundationFok Ying Tung Education
   Foundation [161037]
FX The study was supported by grants from the National Key R&D Program
   (2016YFA0503300), China Postdoctoral Science Foundation (No.
   2019M661817), National Natural Science Foundation of China (No.
   61973155, No. 62003165, No. 81771641, No. 81971439, and No. 82001611),
   the Program for Distinguished Talents of Six Domains in Jiangsu Province
   (YY-019), and the Fok Ying Tung Education Foundation (161037).
CR Adam K, 2020, INT J MOL SCI, V21, DOI 10.3390/ijms21093319
   Adam K, 2018, LAB INVEST, V98, P233, DOI 10.1038/labinvest.2017.118
   Bateman A, 2019, NUCLEIC ACIDS RES, V47, pD506, DOI 10.1093/nar/gky1049
   BOYER PD, 1962, J BIOL CHEM, V237, P3306
   Buchan DWA, 2019, NUCLEIC ACIDS RES, V47, pW402, DOI 10.1093/nar/gkz297
   Burley SK, 2019, NUCLEIC ACIDS RES, V47, pD464, DOI 10.1093/nar/gky1004
   Fuhs SR, 2017, CURR OPIN CELL BIOL, V45, P8, DOI 10.1016/j.ceb.2016.12.010
   Fuhs SR, 2015, CELL, V162, P198, DOI 10.1016/j.cell.2015.05.046
   Gao Y, 2019, PROTEOMICS, V19, DOI 10.1002/pmic.201800471
   Gnad F, 2011, NUCLEIC ACIDS RES, V39, pD253, DOI 10.1093/nar/gkq1159
   Hardman G, 2019, EMBO J, V38, DOI 10.15252/embj.2018100847
   Hindupur SK, 2018, NATURE, V555, P678, DOI 10.1038/nature26140
   Hornbeck PV, 2019, NUCLEIC ACIDS RES, V47, pD433, DOI 10.1093/nar/gky1159
   Huang KY, 2019, NUCLEIC ACIDS RES, V47, pD298, DOI 10.1093/nar/gky1074
   Lapek JD, 2015, N-S ARCH PHARMACOL, V388, P161, DOI 10.1007/s00210-014-1063-4
   Laub MT, 2007, ANNU REV GENET, V41, P121, DOI 10.1146/annurev.genet.41.042007.170548
   Li J, 2014, DATABASE-OXFORD, DOI 10.1093/database/bau025
   Linder M., 2020, COLITIS ASS LOSS LHP, DOI 10.11.334334, 2020.10.11.334334
   Makwana MV, 2018, LAB INVEST, V98, P291, DOI 10.1038/labinvest.2017.126
   Manning G, 2002, TRENDS BIOCHEM SCI, V27, P514, DOI 10.1016/S0968-0004(02)02179-5
   MATTHEWS HR, 1995, PHARMACOL THERAPEUT, V67, P323, DOI 10.1016/0163-7258(95)00020-8
   McAllister TE, 2013, BIOCHEM SOC T, V41, P1072, DOI 10.1042/BST20130071
   Potel CM, 2019, ANAL CHEM, V91, P5542, DOI 10.1021/acs.analchem.9b00734
   Potel CM, 2018, NAT METHODS, V15, P187, DOI [10.1038/NMETH.4580, 10.1038/nmeth.4580]
   Sayers EW, 2012, NUCLEIC ACIDS RES, V40, pD13, DOI [10.1093/nar/gkr1184, 10.1093/nar/gkx1095, 10.1093/nar/gks1189, 10.1093/nar/gky1069, 10.1093/nar/gkv1290]
   Thomason P, 2000, J CELL SCI, V113, P3141
   Ullah S, 2016, SCI REP-UK, V6, DOI 10.1038/srep23534
   Vacic V, 2006, BIOINFORMATICS, V22, P1536, DOI 10.1093/bioinformatics/btl151
   Yu K, 2019, NUCLEIC ACIDS RES, V47, pD451, DOI 10.1093/nar/gky1052
NR 29
TC 1
Z9 1
U1 4
U2 9
PU ELSEVIER
PI AMSTERDAM
PA RADARWEG 29, 1043 NX AMSTERDAM, NETHERLANDS
SN 1874-3919
EI 1876-7737
J9 J PROTEOMICS
JI J. Proteomics
PD JUL 15
PY 2021
VL 243
AR 104262
DI 10.1016/j.jprot.2021.104262
EA MAY 2021
PG 7
WC Biochemical Research Methods
WE Science Citation Index Expanded (SCI-EXPANDED)
SC Biochemistry & Molecular Biology
GA SQ9RV
UT WOS:000660685900002
PM 33984507
DA 2022-04-10
ER

PT J
AU Busek, P
   Malik, R
   Sedo, A
AF Busek, P
   Malik, R
   Sedo, A
TI Dipeptidyl peptidase IV activity and/or structure homologues (DASH) and
   their substrates in cancer
SO INTERNATIONAL JOURNAL OF BIOCHEMISTRY & CELL BIOLOGY
LA English
DT Review
DE dipeptidyl peptidase-IV activity and/or structure homologues (DASH);
   dipeptidyl peptidase; attractin; cancer cell; signaling
ID HORMONE-RELEASING-HORMONE; FIBROBLAST ACTIVATION PROTEIN; GLUCAGON-LIKE
   PEPTIDE-2; T-CELL PROLIFERATION; FACTOR GRF ANALOGS; NEUROPEPTIDE-Y;
   SUBSTANCE-P; MEMBRANE ANTIGEN; MONOCLONAL-ANTIBODY; MOLECULAR-CLONING
AB Post-translational modification of proteins is an important regulatory event. Numerous biologically active peptide that play an essential role in cancerogenesis contain an evolutionary conserved proline residue as a proteolytic-processing regulatory element. Proline-specific proteases could therefore be viewed as important "check-points". Limited proteolysis of such peptide may lead to quantitative but, importantly, due to the change of receptor preference, also qualitative changes of their signaling potential.
   Dipeptidyl peptidase-IV (DPP-IV, EC 3.4.14.5, identical with CD26) was for many years believed to be a unique cell membrane protease cleaving X-Pro dipeptide from the N-terminal end of peptide and proteins. Subsequently, a number of other molecules were discovered, exhibiting various degree of structural homology and DPP-IV-Iike enzyme activity, capable of cleaving similar set of substrates. These comprise for example, seprase, fibroblast activation protein alpha, DPP6, DPP8, DPP9, attractin, N-acetylated-alpha-linked-acidic dipeptidases I, II and L, quiescent cell proline dipeptidase, thymus-specific serine protease and DPP IV-beta. It is tempting to speculate their potential participation on DPP-IV biological function(s). Disrupted expression and enzymatic activity of "DPP-IV activity and/or structure homologues" (DASH) might corrupt the message carried by their substrates, promoting abnormal cell behavior. Consequently, modulation of particular enzyme activity using e.g. DASH inhibitor, specific antibodies or DASH expression modification may be an attractive therapeutic concept in cancer treatment. This review summarizes recent information on the interactions between DASH members and their substrates with respect to their possible role in cancer biology. (C) 2003 Elsevier Ltd. All rights reserved.
C1 Charles Univ Prague, Fac Med 1, Canc Cell Biol Lab, Inst Biochem & Expt Oncol, Prague 12853 2, Czech Republic.
RP Sedo, A (corresponding author), Charles Univ Prague, Fac Med 1, Canc Cell Biol Lab, Inst Biochem & Expt Oncol, Prague 12853 2, Czech Republic.
EM aleksi@mbox.cesnet.cz
RI Malik, Radek/G-3578-2014; Sedo, Aleksi/AAS-9098-2021; Šedo,
   Aleksi/AAN-2034-2021; Busek, Petr/K-2064-2017
OI Malik, Radek/0000-0002-6783-1146; Busek, Petr/0000-0003-2158-4837; Sedo,
   Aleksi/0000-0002-3247-5436
CR AHMAD S, 1992, J PHARMACOL EXP THER, V260, P1257
   Angiolillo AL, 1996, ANN NY ACAD SCI, V795, P158, DOI 10.1111/j.1749-6632.1996.tb52664.x
   Araki H, 2001, J BIOCHEM-TOKYO, V129, P279, DOI 10.1093/oxfordjournals.jbchem.a002855
   Ariga N, 2001, INT J CANCER, V95, P67, DOI 10.1002/1097-0215(20010120)95:1<67::AID-IJC1012>3.3.CO;2-L
   AUGUSTYNS K, 1999, CURRENT MEDICINAL CH, V64, P311
   Azenshtein E, 2002, CANCER RES, V62, P1093
   Barinka C, 2002, J NEUROCHEM, V80, P477, DOI 10.1046/j.0022-3042.2001.00715.x
   Boushey RP, 2001, CANCER RES, V61, P687
   Brubaker PL, 1997, ENDOCRINOLOGY, V138, P4837, DOI 10.1210/en.138.11.4837
   Burrin DG, 2001, J NUTR, V131, P709, DOI 10.1093/jn/131.3.709
   Buteau J, 2001, DIABETES, V50, P2237, DOI 10.2337/diabetes.50.10.2237
   CAMPBELL RM, 1994, peptide, V15, P489, DOI 10.1016/0196-9781(94)90211-9
   Carroll RE, 1999, AM J PHYSIOL-GASTR L, V276, pG655, DOI 10.1152/ajpgi.1999.276.3.G655
   Chang SS, 2000, UROLOGY, V55, P622, DOI 10.1016/S0090-4295(99)00600-7
   Cheng JD, 2002, CANCER RES, V62, P4767
   Chiravuri M, 2000, J IMMUNOL, V165, P5695, DOI 10.4049/jimmunol.165.10.5695
   CHIRAVURI M, 2003, J IMMUNOL, V163, P3092
   Chopin LK, 2001, PROSTATE, V49, P116, DOI 10.1002/pros.1125
   Christopherson KW, 2002, J IMMUNOL, V169, P7000, DOI 10.4049/jimmunol.169.12.7000
   Covas MJ, 1997, INT J CLIN LAB RES, V27, P129, DOI 10.1007/BF02912447
   CUTTITTA F, 1985, NATURE, V316, P823, DOI 10.1038/316823a0
   Dang NH, 2002, HISTOL HISTOPATHOL, V17, P1213, DOI 10.14670/HH-17.1213
   De Meester I, 2000, ADV EXP MED BIOL, V477, P67
   Dong RP, 1996, J IMMUNOL, V156, P1349
   Duke-Cohan JS, 1998, P NATL ACAD SCI USA, V95, P11336, DOI 10.1073/pnas.95.19.11336
   DukeCohan JS, 1996, J IMMUNOL, V156, P1714
   Dunphy JL, 1999, J SURG RES, V87, P130, DOI 10.1006/jsre.1999.5735
   ERLINGE D, 1994, REGUL peptide, V50, P259, DOI 10.1016/0167-0115(94)90006-X
   FROHMAN LA, 1989, J CLIN INVEST, V83, P1533, DOI 10.1172/JCI114049
   Gaetaniello L, 1998, HEPATOLOGY, V27, P934, DOI 10.1002/hep.510270407
   Gehlert DR, 1998, P SOC EXP BIOL MED, V218, P7
   Gerard C, 2001, NAT IMMUNOL, V2, P108, DOI 10.1038/84209
   Ghersi G, 2002, J BIOL CHEM, V277, P29231, DOI 10.1074/jbc.M202770200
   Ghersi G, 2001, peptide, V22, P453, DOI 10.1016/S0196-9781(01)00340-0
   Goldberg Y, 1998, AM J PHYSIOL-CELL PH, V275, pC1207, DOI 10.1152/ajpcell.1998.275.5.C1207
   Goldstein LA, 1997, BBA-MOL BASIS DIS, V1361, P11, DOI 10.1016/S0925-4439(97)00032-X
   Goldstein LA, 2000, J BIOL CHEM, V275, P2554, DOI 10.1074/jbc.275.4.2554
   GOMEZ G, 1995, AM J PHYSIOL-GASTR L, V268, pG71, DOI 10.1152/ajpgi.1995.268.1.G71
   Gonzalez-Gronow M, 2001, BIOCHEM J, V355, P397, DOI 10.1042/0264-6021:3550397
   GRANDT D, 1993, MED KLIN, V88, P143
   Harrison S, 2001, INT J BIOCHEM CELL B, V33, P555, DOI 10.1016/S1357-2725(01)00031-0
   Hartmann B, 2000, ENDOCRINOLOGY, V141, P4013, DOI 10.1210/en.141.11.4013
   Heisler T, 2000, J SURG RES, V91, P9, DOI 10.1006/jsre.2000.5881
   Heston WDW, 1997, UROLOGY, V49, P104, DOI 10.1016/S0090-4295(97)00177-5
   Ho L, 2001, CLIN CANCER RES, V7, P2031
   Hofheinz RD, 2003, ONKOLOGIE, V26, P44, DOI 10.1159/000069863
   Inui A, 1999, TRENDS PHARMACOL SCI, V20, P43, DOI 10.1016/S0165-6147(99)01303-6
   Iwamura M, 1998, Urol Oncol, V4, P24, DOI 10.1016/S1078-1439(98)00028-3
   Iwata S, 1999, J EXP MED, V190, P301, DOI 10.1084/jem.190.3.301
   JOHNSON RC, 1993, J CELL BIOL, V121, P1423, DOI 10.1083/jcb.121.6.1423
   Kahan Z, 1999, J CLIN ENDOCR METAB, V84, P582, DOI 10.1210/jc.84.2.582
   Kajiyama H, 2002, CANCER RES, V62, P2753
   Kiaris H, 1999, P NATL ACAD SCI USA, V96, P14894, DOI 10.1073/pnas.96.26.14894
   Lambeir AM, 2001, FEBS LETT, V507, P327, DOI 10.1016/S0014-5793(01)02982-9
   Lapidus RG, 2000, PROSTATE, V45, P350, DOI 10.1002/1097-0045(20001201)45:4<350::AID-PROS10>3.0.CO;2-U
   LEHMANN J, 1990, DRUG DEVELOP RES, V19, P329, DOI 10.1002/ddr.430190402
   Levite M, 2000, ANN NY ACAD SCI, V917, P307
   Levite M, 1998, J IMMUNOL, V160, P993
   Liotta LA, 2001, NATURE, V411, P375, DOI 10.1038/35077241
   Lovshin J, 2000, REGUL peptide, V90, P27, DOI 10.1016/S0167-0115(00)00117-8
   Ludwig A, 2002, J LEUKOCYTE BIOL, V72, P183
   Mannon PJ, 2000, BIOCHEM J, V350, P655, DOI 10.1042/0264-6021:3500655
   Maraj BH, 1998, BRIT J UROL, V81, P523
   MEDEIROS MD, 1994, ENDOCRINOLOGY, V134, P2088, DOI 10.1210/en.134.5.2088
   Mellado M, 2001, CURR BIOL, V11, P691, DOI 10.1016/S0960-9822(01)00199-3
   MENTLEIN R, 1993, REGUL peptide, V49, P133, DOI 10.1016/0167-0115(93)90435-B
   Mentlein R, 1999, REGUL peptide, V85, P9, DOI 10.1016/S0167-0115(99)00089-0
   Mueller SC, 1999, J BIOL CHEM, V274, P24947, DOI 10.1074/jbc.274.35.24947
   Mule JJ, 1996, HUM GENE THER, V7, P1545, DOI 10.1089/hum.1996.7.13-1545
   Muller A, 2001, NATURE, V410, P50, DOI 10.1038/35065016
   Nagakawa O, 1998, CANCER LETT, V133, P27, DOI 10.1016/S0304-3835(98)00186-4
   Nakahara H, 1996, J BIOL CHEM, V271, P27221, DOI 10.1074/jbc.271.44.27221
   Nie M, 1998, REGUL peptide, V75-6, P207, DOI 10.1016/S0167-0115(98)00070-6
   Ogasawara M, 1997, CANCER LETT, V116, P111, DOI 10.1016/S0304-3835(97)00167-5
   Ohnuma K, 2001, J IMMUNOL, V167, P6745, DOI 10.4049/jimmunol.167.12.6745
   Palma C, 1999, BRIT J CANCER, V79, P236, DOI 10.1038/sj.bjc.6690039
   Palma C, 2000, LIFE SCI, V67, P985, DOI 10.1016/S0024-3205(00)00692-5
   PALMIERI FE, 1983, BIOCHIM BIOPHYS ACTA, V755, P522, DOI 10.1016/0304-4165(83)90259-3
   Pangalos MN, 1999, J BIOL CHEM, V274, P8470, DOI 10.1074/jbc.274.13.8470
   Park JE, 1999, J BIOL CHEM, V274, P36505, DOI 10.1074/jbc.274.51.36505
   Pinto JT, 1996, CLIN CANCER RES, V2, P1445
   Proost P, 2000, BLOOD, V96, P1674, DOI 10.1182/blood.V96.5.1674.h8001674a_1674_1680
   Proost P, 2001, BLOOD, V98, P3554, DOI 10.1182/blood.V98.13.3554
   RETTIG WJ, 1993, CANCER RES, V53, P3327
   Reubi JC, 2001, CANCER RES, V61, P4636
   Rippmann JF, 2000, BIOCHEM J, V349, P805, DOI 10.1042/bj3490805
   Russell JS, 1996, peptide, V17, P1397, DOI 10.1016/S0196-9781(96)00201-X
   SCANLAN MJ, 1994, P NATL ACAD SCI USA, V91, P5657, DOI 10.1073/pnas.91.12.5657
   Schally AV, 1999, TRENDS ENDOCRIN MET, V10, P383, DOI 10.1016/S1043-2760(99)00209-X
   Schally AV, 2001, FRONT NEUROENDOCRIN, V22, P248, DOI 10.1006/frne.2001.0217
   Seckl MJ, 1997, CANCER RES, V57, P51
   SEDO A, 1991, J CANCER RES CLIN, V117, P249, DOI 10.1007/BF01625433
   Sedo A, 2001, BBA-PROTEIN STRUCT M, V1550, P107, DOI 10.1016/S0167-4838(01)00278-3
   Sgadari C, 1997, BLOOD, V89, P2635, DOI 10.1182/blood.V89.8.2635
   SU CM, 1991, HORM METAB RES, V23, P15, DOI 10.1055/s-2007-1003601
   Taichman RS, 2002, CANCER RES, V62, P1832
   Takano T, 2001, NAT MED, V7, P1010, DOI 10.1038/nm0901-1010
   TANAKA T, 1994, P NATL ACAD SCI USA, V91, P3082, DOI 10.1073/pnas.91.8.3082
   Tiffany CW, 1999, PROSTATE, V39, P28
   Tseng WW, 2002, peptide, V23, P389, DOI 10.1016/S0196-9781(01)00616-7
   Van Damme J, 1999, Chem Immunol, V72, P42, DOI 10.1159/000058725
   VANHOOF G, 1995, FASEB J, V9, P736, DOI 10.1096/fasebj.9.9.7601338
   Vicari AP, 2002, CYTOKINE GROWTH F R, V13, P143, DOI 10.1016/S1359-6101(01)00033-8
   Wang JM, 1998, INT J CANCER, V75, P900, DOI 10.1002/(SICI)1097-0215(19980316)75:6<900::AID-IJC13>3.0.CO;2-6
   WANG LH, 1991, peptide, V12, P1357, DOI 10.1016/0196-9781(91)90220-J
   WELT S, 1994, J CLIN ONCOL, V12, P1193, DOI 10.1200/JCO.1994.12.6.1193
   Wesley UV, 1999, J EXP MED, V190, P311, DOI 10.1084/jem.190.3.311
   ZICHE M, 1991, LIFE SCI, V48, pPL7, DOI 10.1016/0024-3205(91)90417-A
   Zukowska-Grojec Z, 1998, CIRC RES, V83, P187, DOI 10.1161/01.RES.83.2.187
NR 109
TC 84
Z9 86
U1 0
U2 13
PU PERGAMON-ELSEVIER SCIENCE LTD
PI OXFORD
PA THE BOULEVARD, LANGFORD LANE, KIDLINGTON, OXFORD OX5 1GB, ENGLAND
SN 1357-2725
EI 1878-5875
J9 INT J BIOCHEM CELL B
JI Int. J. Biochem. Cell Biol.
PD MAR
PY 2004
VL 36
IS 3
BP 408
EP 421
DI 10.1016/S1357-2725(03)00262-0
PG 14
WC Biochemistry & Molecular Biology; Cell Biology
WE Science Citation Index Expanded (SCI-EXPANDED)
SC Biochemistry & Molecular Biology; Cell Biology
GA 836EE
UT WOS:000222537400008
PM 14687920
DA 2022-04-10
ER

PT J
AU Abshiru, NA
   Sikora, JW
   Camarillo, JM
   Morris, JA
   Compton, PD
   Lee, T
   Neelamraju, Y
   Haddox, S
   Sheridan, C
   Carroll, M
   Cripe, LD
   Tallman, MS
   Paietta, EM
   Melnick, AM
   Thomas, PM
   Garrett-Bakelman, FE
   Kelleher, NL
AF Abshiru, Nebiyu A.
   Sikora, Jacek W.
   Camarillo, Jeannie M.
   Morris, Juliette A.
   Compton, Philip D.
   Lee, Tak
   Neelamraju, Yaseswini
   Haddox, Samuel
   Sheridan, Caroline
   Carroll, Martin
   Cripe, Larry D.
   Tallman, Martin S.
   Paietta, Elisabeth M.
   Melnick, Ari M.
   Thomas, Paul M.
   Garrett-Bakelman, Francine E.
   Kelleher, Neil L.
TI Targeted detection and quantitation of histone modification from 1,000
   cells
SO PLOS ONE
LA English
DT Article
ID MODIFICATIONS PREDICT PROGNOSIS; mass spectrometry REVEALS; CANCER;
   ACETYLATION; METHYLATION; CHROMATIN; H3; QUANTIFICATION; PROTEINS;
   PATTERNS
AB Histone post-translational modification (PTMs) create a powerful regulatory mechanism for maintaining chromosomal integrity in cells. Histone acetylation and methylation, the most widely studied histone PTMs, act in concert with chromatin-associated proteins to control access to genetic information during transcription. Alterations in cellular histone PTMs have been linked to disease states and have crucial biomarkers and therapeutic potential. Traditional bottom-up mass spectrometry of histones requires large numbers of cells, typically one million or more. However, for some cell subtype-specific studies, it is difficult or impossible to obtain such large numbers of cells and quantification of rare histone PTMs is often unachievable. An established targeted LC-MS/MS method was used to quantify the abundance of histone PTMs from cell lines and primary human specimens. Sample preparation was modified by omitting nuclear isolation and reducing the rounds of histone derivatization to improve detection of histone peptide down to 1,000 cells. In the current study, we developed and validated a quantitative LC-MS/MS approach tailored for a targeted histone assay of 75 histone peptide with as few as 10,000 cells. Furthermore, we were able to detect and quantify 61 histone peptide from just 1,000 primary human stem cells. Detection of 37 histone peptide was possible from 1,000 acute myeloid leukemia patient cells. We anticipate that this revised method can be used in many applications where achieving large cell numbers is challenging, including rare human cell populations.
C1 [Abshiru, Nebiyu A.; Sikora, Jacek W.; Camarillo, Jeannie M.; Morris, Juliette A.; Compton, Philip D.; Thomas, Paul M.; Kelleher, Neil L.] Northwestern Univ, Dept Chem, Evanston, IL 60201 USA.
   [Abshiru, Nebiyu A.; Sikora, Jacek W.; Camarillo, Jeannie M.; Morris, Juliette A.; Compton, Philip D.; Thomas, Paul M.; Kelleher, Neil L.] Northwestern Univ, Dept Mol Biosci, Evanston, IL 60201 USA.
   [Abshiru, Nebiyu A.; Sikora, Jacek W.; Camarillo, Jeannie M.; Morris, Juliette A.; Compton, Philip D.; Thomas, Paul M.; Kelleher, Neil L.] Northwestern Univ, Prote Ctr Excellence, Evanston, IL 60201 USA.
   [Lee, Tak; Sheridan, Caroline; Melnick, Ari M.; Garrett-Bakelman, Francine E.] Weill Cornell Med, Div Hematol Oncol, Dept Med, New York, NY 10065 USA.
   [Neelamraju, Yaseswini; Haddox, Samuel; Garrett-Bakelman, Francine E.] Univ Virginia, Dept Biochem & Mol Genet, Charlottesville, VA 22904 USA.
   [Carroll, Martin] Univ Penn, Div Hematol & Oncol, Perelman Sch Med, Philadelphia, PA 19104 USA.
   [Cripe, Larry D.] Indiana Univ, Melvin & Bren Simon Canc Ctr, Indianapolis, IN 46204 USA.
   [Tallman, Martin S.] Mem Sloan Kettering Canc Ctr, 1275 York Ave, New York, NY 10021 USA.
   [Paietta, Elisabeth M.] Montefiore Med Ctr, Moses Campus, Bronx, NY USA.
   [Garrett-Bakelman, Francine E.] Univ Virginia, Dept Med, Div Hematol Med Oncol, Charlottesville, VA 22904 USA.
RP Kelleher, NL (corresponding author), Northwestern Univ, Dept Chem, Evanston, IL 60201 USA.; Kelleher, NL (corresponding author), Northwestern Univ, Dept Mol Biosci, Evanston, IL 60201 USA.; Kelleher, NL (corresponding author), Northwestern Univ, Prote Ctr Excellence, Evanston, IL 60201 USA.; Garrett-Bakelman, FE (corresponding author), Weill Cornell Med, Div Hematol Oncol, Dept Med, New York, NY 10065 USA.; Garrett-Bakelman, FE (corresponding author), Univ Virginia, Dept Biochem & Mol Genet, Charlottesville, VA 22904 USA.; Garrett-Bakelman, FE (corresponding author), Univ Virginia, Dept Med, Div Hematol Med Oncol, Charlottesville, VA 22904 USA.
EM fg5q@virginia.edu; n-kelleher@northwestern.edu
RI Compton, Philip/AAK-9633-2021
OI Compton, Philip/0000-0001-5212-7175
FU Paul G. Allen Family Foundation [11715]; NCIUnited States Department of
   Health & Human ServicesNational Institutes of Health (NIH) - USANIH
   National Cancer Institute (NCI) [CCSG P30CA060553, K08CA169055]; UVA
   Cancer Center through the NCI Cancer Center Support Grant [P30CA44579];
   University of Virginia; American Society of Hematology under the
   ASH-AMFDP [ASHAMFDP-20121]; Robert Wood Johnson FoundationRobert Wood
   Johnson Foundation (RWJF); National Cancer Institute of the National
   Institutes of HealthUnited States Department of Health & Human
   ServicesNational Institutes of Health (NIH) - USANIH National Cancer
   Institute (NCI) [CA180827, CA180820, CA233290, CA189859, CA233321,
   CA233270]; National Resource for Translational and Developmental
   Proteomics [P41GM108569]
FX This work was carried out with a financial support from The Paul G.
   Allen Family Foundation (Award #11715), NCI CCSG P30CA060553 awarded to
   the Robert H. Lurie Comprehensive Cancer Center, and the National
   Resource for Translational and Developmental Proteomics supported by
   P41GM108569 to NLK. We would also like to acknowledge funding from NCI
   K08CA169055, UVA Cancer Center through the NCI Cancer Center Support
   Grant P30CA44579, the University of Virginia and the American Society of
   Hematology (ASHAMFDP-20121) under the ASH-AMFDP partnership with The
   Robert Wood Johnson Foundation to FEG-B. This study was conducted by the
   ECOG-ACRIN Cancer Research Group (Peter J. O'Dwyer, MD and Mitchell D.
   Schnall, MD, PhD, Group Co-Chairs) and supported by the National Cancer
   Institute of the National Institutes of Health under the following award
   numbers: CA180827, CA180820, CA233290, CA189859, CA233321, CA233270. The
   funders had no role in study design, data collection and analysis,
   decision to publish, or preparation of the manuscript.
CR [Anonymous], 2008, REV PRESCRIRE, V28, P468
   [Anonymous], 2014, J VISUAL COMMUNICATI, V11, P41
   Bannister AJ, 2011, CELL RES, V21, P381, DOI 10.1038/cr.2011.22
   Barlesi F, 2007, J CLIN ONCOL, V25, P4358, DOI 10.1200/JCO.2007.11.2599
   Bernt KM, 2011, CANCER CELL, V20, P66, DOI 10.1016/j.ccr.2011.06.010
   Bock I, 2011, epigenetic-US, V6, P256, DOI 10.4161/epi.6.2.13837
   Chopra M, 2015, CANCER GENET-NY, V208, P192, DOI 10.1016/j.cancergen.2014.10.005
   Daigle SR, 2011, CANCER CELL, V20, P53, DOI 10.1016/j.ccr.2011.06.009
   Ding J, 2020, NAT BIOTECHNOL, V38, P737, DOI 10.1038/s41587-020-0465-8
   Feng JX, 2019, ANAL CHEM, V91, P5613, DOI 10.1021/acs.analchem.8b05226
   Garcia BA, 2007, NAT PROTOC, V2, P933, DOI 10.1038/nprot.2007.106
   Guo Q, 2018, J PROTEOME RES, V17, P234, DOI 10.1021/acs.jproteome.7b00544
   James R, 2019, HAEMATOLOGICA, V105, P2273
   Kim KH, 2016, NAT MED, V22, P128, DOI 10.1038/nm.4036
   Kouzarides T, 2002, CURR OPIN GENET DEV, V12, P198, DOI 10.1016/S0959-437X(02)00287-3
   Kouzarides T, 2007, CELL, V128, P693, DOI 10.1016/j.cell.2007.02.005
   Lawrence M, 2016, TRENDS GENET, V32, P42, DOI 10.1016/j.tig.2015.10.007
   Li GH, 2011, CURR OPIN GENET DEV, V21, P175, DOI 10.1016/j.gde.2011.01.022
   Luo X, 2017, ANAL CHEM, V89, P11664, DOI 10.1021/acs.analchem.7b03100
   MacLean B, 2010, BIOINFORMATICS, V26, P966, DOI 10.1093/bioinformatics/btq054
   Martin C, 2005, NAT REV MOL CELL BIO, V6, P838, DOI 10.1038/nrm1761
   Masumoto H, 2005, NATURE, V436, P294, DOI 10.1038/nature03714
   Muller-Tidow C, 2010, BLOOD, V116, P3564, DOI 10.1182/blood-2009-09-240978
   Noberini R, 2019, METHODS
   Noberini R, 2017, CLIN epigenetic, V9, DOI 10.1186/s13148-017-0369-8
   Peach SE, 2012, MOL CELL PROTEOMICS, V11, P128, DOI 10.1074/mcp.M111.015941
   Pesavento JJ, 2006, ANAL CHEM, V78, P4271, DOI 10.1021/ac0600050
   Peterson CL, 2004, CURR BIOL, V14, pR546, DOI 10.1016/j.cub.2004.07.007
   Pfaffl MW, 2001, NUCLEIC ACIDS RES, V29, DOI 10.1093/nar/29.9.e45
   Piunti A, 2017, NAT MED, V23, P493, DOI 10.1038/nm.4296
   Plazas-Mayorca MD, 2009, J PROTEOME RES, V8, P5367, DOI 10.1021/pr900777e
   Rao RC, 2015, NAT REV CANCER, V15, P334, DOI 10.1038/nrc3929
   Schultz DC, 2002, GENE DEV, V16, P919, DOI 10.1101/gad.973302
   Seligson DB, 2009, AM J PATHOL, V174, P1619, DOI 10.2353/ajpath.2009.080874
   Seligson DB, 2005, NATURE, V435, P1262, DOI 10.1038/nature03672
   Sidoli S, 2017, EPIGENET CHROMATIN, V10, DOI 10.1186/s13072-017-0139-z
   Song JS, 2012, PATHOL INT, V62, P182, DOI 10.1111/j.1440-1827.2011.02776.x
   Su XD, 2007, EXPERT REV PROTEOMIC, V4, P211, DOI 10.1586/14789450.4.2.211
   Terranova R, 2006, P NATL ACAD SCI USA, V103, P6629, DOI 10.1073/pnas.0507425103
   Waki M, 2014, BIOCHIMIE, V107, P73, DOI 10.1016/j.biochi.2014.10.003
   Wouters BJ, 2016, BLOOD, V127, P42, DOI 10.1182/blood-2015-07-604512
   Yuan J, 2009, CELL CYCLE, V8, P1747, DOI 10.4161/cc.8.11.8620
   Zheng YP, 2016, MOL CELL PROTEOMICS, V15, P776, DOI 10.1074/mcp.M115.053819
   Zheng YP, 2013, NAT COMMUN, V4, DOI 10.1038/ncomms3203
   Zheng YP, 2012, P NATL ACAD SCI USA, V109, P13549, DOI 10.1073/pnas.1205707109
NR 45
TC 0
Z9 0
U1 0
U2 3
PU PUBLIC LIBRARY SCIENCE
PI SAN FRANCISCO
PA 1160 BATTERY STREET, STE 100, SAN FRANCISCO, CA 94111 USA
SN 1932-6203
J9 PLOS ONE
JI PLoS One
PD OCT 26
PY 2020
VL 15
IS 10
AR e0240829
DI 10.1371/journal.pone.0240829
PG 17
WC Multidisciplinary Sciences
WE Science Citation Index Expanded (SCI-EXPANDED)
SC Science & Technology - Other Topics
GA OP8VY
UT WOS:000588370000017
PM 33104722
OA Green Published, gold
DA 2022-04-10
ER

PT J
AU Amjadi, M
   Hallaj, T
   Hildebrandt, N
AF Amjadi, Mohammad
   Hallaj, Tooba
   Hildebrandt, Niko
TI A sensitive homogeneous enzyme assay for euchromatic
   histone-lysine-N-methyltransferase 2 (G9a) based on terbium-to-quantum
   dot time-resolved FRET
SO BIOIMPACTS
LA English
DT Article
DE Enzyme assay; Histone-modifying enzymes; Epigenetic enzymes;
   Time-resolved FRET; Inhibitor screening
ID BIOCHEMICAL ASSAY; ENERGY-TRANSFER; inhibitor; SPECIFICITY; H3
AB Introduction: Histone modifying enzymes include several classes of enzymes that are responsible for various post-translational modification of histones such as methylation and acetylation. They are important epigenetic factors, which may involve several diseases and so their assay, as well as screening of their inhibitor, are of great importance. Herein, a bioassay based on terbiumto-quantum dot (Tb-to-QD) time-resolved Forster resonance energy transfer (TR-FRET) was developed for monitoring the activity of G9a, the euchromatic histone-lysine N-methyltransferase 2. Overexpression of G9a has been reported in some cancers such as ovarian carcinoma, lung cancer, multiple myeloma and brain cancer. Thus, inhibition of this enzyme is important for therapeutic purposes.
   Methods: In this assay, a biotinylated peptide was used as a G9a substrate in conjugation with streptavidin-coated ZnS/CdSe QD as FRET acceptor, and an anti-mark antibody labeled with Tb as a donor. Time-resolved fluorescence was used for measuring FRET ratios.
   Results: We examined three QDs, with emission wavelengths of 605, 655 and 705 nm, as FRET acceptors and investigated FRET efficiency between the Tb complex and each of them. Since the maximum FRET efficiency was obtained for Tb to QD705 (more than 50%), this pair was exploited for designing the enzyme assay. We showed that the method has excellent sensitivity and selectivity for the determination of G9a at concentrations as low as 20 pM. Furthermore, the designed assay was applied for screening of an enzyme inhibitor, S-(5'-Adenosyl)-L-homocysteine (SAI).
   Conclusion: It was shown that Tb-to-QD FRET is an outstanding platform for developing a homogenous assay for the G9a enzyme and its inhibitor. The obtained results confirmed that this assay was quite sensitive and could he used in the field of inhibitor screening.
C1 [Amjadi, Mohammad; Hallaj, Tooba] Univ Tabriz, Fac Chem, Dept Analyt Chem, Tabriz 5166616471, Iran.
   [Hallaj, Tooba] Urmia Univ Med Sci, Cellular & Mol Res Ctr, Cellular & Mol Med Inst, Orumiyeh, Iran.
   [Hildebrandt, Niko] Univ Paris Sud, Univ Paris Saclay, Inst Integrat Biol Cell I2BC, NanoBioPhoton,CEA, Orsay, France.
   [Hildebrandt, Niko] Univ Rouen Normandie, Lab Chim Organ Bioorgan Reactivite & Anal COBRA, INSA, CNRS, F-76821 Mont St Aignan, France.
RP Amjadi, M (corresponding author), Univ Tabriz, Fac Chem, Dept Analyt Chem, Tabriz 5166616471, Iran.
EM amjadi@tabrizu.ac.ir
RI Amjadi, Mohammad/ABF-7436-2020; Hallaj, Tooba/Z-5800-2019
OI Amjadi, Mohammad/0000-0002-1942-9187; Hallaj, Tooba/0000-0001-9825-6220
FU Center for International Scientific Studies & Collaborations (CISSC)
FX This work has been supported by the Center for International Scientific
   Studies & Collaborations (CISSC).
CR Cao H, 2019, EUR J MED CHEM, V179, P537, DOI 10.1016/j.ejmech.2019.06.072
   Copeland RA, 2010, CURR OPIN CHEM BIOL, V14, P505, DOI 10.1016/j.cbpa.2010.06.174
   Dhayalan A, 2009, J BIOMOL SCREEN, V14, P1129, DOI 10.1177/1087057109345528
   Dillon MBC, 2012, ACS CHEM BIOL, V7, P1198, DOI 10.1021/cb300024c
   Ghadiali JE, 2011, ANGEW CHEM INT EDIT, V50, P3417, DOI 10.1002/anie.201008263
   Hendricks CL, 2004, ANAL BIOCHEM, V326, P100, DOI 10.1016/j.ab.2003.11.014
   Henry RA, 2013, BIOCHEMISTRY-US, V52, P5746, DOI 10.1021/bi400684q
   Hildebrandt N, 2017, CHEM REV, V117, P536, DOI 10.1021/acs.chemrev.6b00030
   Hildebrandt N, 2014, COORDIN CHEM REV, V273, P125, DOI 10.1016/j.ccr.2014.01.020
   Horiuchi KY, 2013, ASSAY DRUG DEV TECHN, V11, P227, DOI 10.1089/adt.2012.480
   Klink TA, 2012, J BIOMOL SCREEN, V17, P59, DOI 10.1177/1087057111421624
   Kubicek S, 2007, MOL CELL, V25, P473, DOI 10.1016/j.molcel.2007.01.017
   Kumar M, 2015, ASSAY DRUG DEV TECHN, V13, P200, DOI 10.1089/adt.2014.609
   Kuninger D, 2007, J BIOTECHNOL, V131, P253, DOI 10.1016/j.jbiotec.2007.07.498
   Lehnertz B, 2014, GENE DEV, V28, P317, DOI 10.1101/gad.236794.113
   Li S, 2013, ANAL BIOCHEM, V443, P214, DOI 10.1016/j.ab.2013.08.029
   Ma F, 2016, CHEM COMMUN, V52, P1218, DOI 10.1039/c5cc08797j
   Machleidt T, 2011, J BIOMOL SCREEN, V16, P1236, DOI 10.1177/1087057111422943
   Martinez Natalia J, 2015, Drug Discov Today Technol, V18, P9, DOI 10.1016/j.ddtec.2015.10.004
   Medintz I., 2014, FRET FORSTER RESONAN
   Patnaik D, 2004, J BIOL CHEM, V279, P53248, DOI 10.1074/jbc.M409604200
   Richon VM, 2011, CHEM BIOL DRUG DES, V78, P199, DOI 10.1111/j.1747-0285.2011.01135.x
   Wang Xi, 2008, Ai Zheng, V27, P1018
   Wei L, 2017, J HEPATOL, V67, P758, DOI 10.1016/j.jhep.2017.05.015
   Xu JD, 2011, J AM CHEM SOC, V133, P19900, DOI 10.1021/ja2079898
   Yokoyama M, 2017, ONCOTARGET, V8, P21315, DOI 10.18632/oncotarget.15528
   Yu V, 2012, J BIOMOL SCREEN, V17, P27, DOI 10.1177/1087057111418228
   Zagni C, 2013, CURR MED CHEM, V20, P167, DOI 10.2174/092986713804806667
   Zhang KQ, 2018, MOL CANCER, V17, DOI 10.1186/s12943-018-0896-8
NR 29
TC 0
Z9 0
U1 5
U2 7
PU TABRIZ UNIV MEDICAL SCIENCES & HEALTH SERVICES
PI TABRIZ
PA DANESHGHAH ST, TABRIZ, REPUBLIC ISLAMIC 51664-14766, IRAN
SN 2228-5652
EI 2228-5660
J9 BIOIMPACTS
JI BioImpacts
PY 2021
VL 11
IS 3
BP 173
EP 179
DI 10.34172/bi.2021.23
PG 7
WC Pharmacology & Pharmacy
WE Science Citation Index Expanded (SCI-EXPANDED)
SC Pharmacology & Pharmacy
GA SL1JQ
UT WOS:000656674800003
PM 34336605
OA Green Published, gold
DA 2022-04-10
ER

PT J
AU Gong, FD
   Miller, KM
AF Gong, Fade
   Miller, Kyle M.
TI Histone methylation and the DNA damage response
SO MUTATION RESEARCH-REVIEWS IN MUTATION RESEARCH
LA English
DT Review
DE Chromatin; DNA damage; DNA repair; Histone methylation; Genome stability
ID STRAND BREAK REPAIR; HOMOLOGOUS RECOMBINATION; ARGININE METHYLATION;
   LYSINE METHYLATION; 53BP1 RECRUITMENT; GENOME INTEGRITY;
   MISMATCH-REPAIR; CHROMATIN MODIFICATIONS; BRANCHED EVOLUTION;
   CELLULAR-RESPONSE
AB Preserving genome function and stability are paramount for ensuring cellular homeostasis, an imbalance in which can promote diseases including cancer. In the presence of DNA lesions, cells activate pathway referred to as the DNA damage response (DDR). As nuclear DNA is bound by histone proteins and organized into chromatin in eukaryotes, DDR pathway have evolved to sense, signal and repair DNA damage within the chromatin environment. Histone proteins, which constitute the building blocks of chromatin, are highly modified by post-translational modification (PTMs) that regulate chromatin structure and function. An essential histone PTM involved in the DDR is histone methylation, which is regulated by histone methyltransferase (HMT) and histone demethylase (HDM) enzymes that add and remove methyl groups on lysine and arginine residues within proteins respectively. Methylated histones can alter how proteins interact with chromatin, including their ability to be bound by reader proteins that recognize these PTMs. Here, we review histone methylation in the context of the DDR, focusing on DNA double-strand breaks (DSBs), a particularly toxic lesion that can trigger genome instability and cell death. We provide a comprehensive overview of histone methylation changes that occur in response to DNA damage and how the enzymes and reader proteins of these marks orchestrate the DDR. Finally, as many epigenetic pathway including histone methylation are altered in cancer, we discuss the potential involvement of these pathway in the etiology and treatment of this disease.
C1 [Gong, Fade; Miller, Kyle M.] Univ Texas Austin, Inst Cellular & Mol Biol, Dept Mol Biosci, 2506 Speedway, Austin, TX 78712 USA.
RP Miller, KM (corresponding author), Univ Texas Austin, Inst Cellular & Mol Biol, Dept Mol Biosci, 2506 Speedway, Austin, TX 78712 USA.
EM kyle.miller@austin.utexas.edu
OI Miller, Kyle/0000-0002-4544-0013
FU NIH National Cancer InstituteUnited States Department of Health & Human
   ServicesNational Institutes of Health (NIH) - USANIH National Cancer
   Institute (NCI) [R01CA198279, R01CA201268]; American Cancer
   SocietyAmerican Cancer Society [RSG-16-042-01-DMC]; NATIONAL CANCER
   INSTITUTEUnited States Department of Health & Human ServicesNational
   Institutes of Health (NIH) - USANIH National Cancer Institute (NCI)
   [R01CA198279, R01CA201268] Funding Source: NIH RePORTER
FX The K.M.M. laboratory is suppported by the NIH National Cancer Institute
   (R01CA198279 and R01CA201268) and the American Cancer Society
   (RSG-16-042-01-DMC).
CR Acs K, 2011, NAT STRUCT MOL BIOL, V18, P1345, DOI 10.1038/nsmb.2188
   Agarwal P, 2016, BIOCHEM CELL BIOL, V94, P381, DOI 10.1139/bcb-2016-0017
   Alagoz M, 2015, NUCLEIC ACIDS RES, V43, P7931, DOI 10.1093/nar/gkv722
   Albert M, 2010, SEMIN CELL DEV BIOL, V21, P209, DOI 10.1016/j.semcdb.2009.10.007
   Nguyen AT, 2011, GENE DEV, V25, P1345, DOI 10.1101/gad.2057811
   Auclair Y, 2013, DNA REPAIR, V12, P459, DOI 10.1016/j.dnarep.2013.04.006
   Awwad SW, 2015, BIOL OPEN, V4, P498, DOI 10.1242/bio.201410991
   Aymard F, 2014, NAT STRUCT MOL BIOL, V21, P366, DOI 10.1038/nsmb.2796
   Ayrapetov MK, 2014, P NATL ACAD SCI USA, V111, P9169, DOI 10.1073/pnas.1403565111
   Bannister AJ, 2005, J BIOL CHEM, V280, P17732, DOI 10.1074/jbc.M500796200
   Bannister AJ, 2001, NATURE, V410, P120, DOI 10.1038/35065138
   Barski A, 2007, CELL, V129, P823, DOI 10.1016/j.cell.2007.05.009
   Beck H, 2012, MOL CELL BIOL, V32, P4226, DOI 10.1128/MCB.00412-12
   Beck H, 2010, J CELL BIOL, V188, P629, DOI 10.1083/jcb.200905059
   Bedford MT, 2009, MOL CELL, V33, P1, DOI 10.1016/j.molcel.2008.12.013
   Behjati S, 2013, NAT GENET, V45, P1479, DOI 10.1038/ng.2814
   Biggar KK, 2015, NAT REV MOL CELL BIO, V16, P5, DOI 10.1038/nrm3915
   Bird A, 2002, GENE DEV, V16, P6, DOI 10.1101/gad.947102
   Black JC, 2012, MOL CELL, V48, P491, DOI 10.1016/j.molcel.2012.11.006
   Blanc RS, 2017, MOL CELL, V65, P8, DOI 10.1016/j.molcel.2016.11.003
   Bottger A, 2015, BIOCHEM J, V468, P191, DOI 10.1042/BJ20150278
   Boisvert FM, 2005, GENE DEV, V19, P671, DOI 10.1101/gad.1279805
   Boisvert FM, 2005, CELL CYCLE, V4, P1834, DOI 10.4161/cc.4.12.2250
   Bond DM, 2014, TRENDS CELL BIOL, V24, P100, DOI 10.1016/j.tcb.2013.08.001
   Bostelman LJ, 2007, DNA REPAIR, V6, P383, DOI 10.1016/j.dnarep.2006.12.010
   Botuyan MV, 2006, CELL, V127, P1361, DOI 10.1016/j.cell.2006.10.043
   Campbell S, 2013, CELL CYCLE, V12, P2675, DOI 10.4161/cc.25795
   Campos EI, 2009, ANNU REV GENET, V43, P559, DOI 10.1146/annurev.genet.032608.103928
   Cao LL, 2016, ONCOGENE, V35, P402, DOI 10.1038/onc.2015.311
   Carvalho S, 2014, ELIFE, V3, DOI 10.7554/eLife.02482
   Chan KM, 2013, GENE DEV, V27, P985, DOI 10.1101/gad.217778.113
   Chang BS, 2007, SCIENCE, V318, P444, DOI 10.1126/science.1145801
   Chapman JR, 2012, MOL CELL, V47, P497, DOI 10.1016/j.molcel.2012.07.029
   Chaudhuri AR, 2016, NATURE, V535, P382, DOI 10.1038/nature18325
   Chi P, 2010, NAT REV CANCER, V10, P457, DOI 10.1038/nrc2876
   Chou DM, 2010, P NATL ACAD SCI USA, V107, P18475, DOI 10.1073/pnas.1012946107
   Ciccia A, 2010, MOL CELL, V40, P179, DOI 10.1016/j.molcel.2010.09.019
   Clarke TL, 2017, MOL CELL, V65, P900, DOI 10.1016/j.molcel.2017.01.019
   Cuella-Martin R, 2016, MOL CELL, V64, P51, DOI 10.1016/j.molcel.2016.08.002
   Cuozzo C, 2007, PLOS GENET, V3, P1144, DOI 10.1371/journal.pgen.0030110
   Dalgliesh GL, 2010, NATURE, V463, P360, DOI 10.1038/nature08672
   Daugaard M, 2012, NAT STRUCT MOL BIOL, V19, P803, DOI 10.1038/nsmb.2314
   Dawson MA, 2017, SCIENCE, V355, P1147, DOI 10.1126/science.aam7304
   Dawson MA, 2012, NEW ENGL J MED, V367, P647, DOI 10.1056/NEJMra1112635
   Dawson MA, 2012, CELL, V150, P12, DOI 10.1016/j.cell.2012.06.013
   Dimitrova E, 2015, EMBO REP, V16, P1620, DOI 10.15252/embr.201541113
   Doil C, 2009, CELL, V136, P435, DOI 10.1016/j.cell.2008.12.041
   Duns G, 2010, CANCER RES, V70, P4287, DOI 10.1158/0008-5472.CAN-10-0120
   El-Andaloussi N, 2006, MOL CELL, V22, P51, DOI 10.1016/j.molcel.2006.02.013
   El-Andaloussi N, 2007, FASEB J, V21, P26, DOI 10.1096/fj.06-6194com
   Fahey C. C., 2017, COLD SPRING HARB PER
   Farooq Z, 2016, MUTAT RES-REV MUTAT, V768, P46, DOI 10.1016/j.mrrev.2016.03.005
   Feinberg AP, 2016, NAT REV GENET, V17, P284, DOI 10.1038/nrg.2016.13
   Fnu S, 2011, P NATL ACAD SCI USA, V108, P540, DOI 10.1073/pnas.1013571108
   Fradet-Turcotte A, 2013, NATURE, V499, P50, DOI 10.1038/nature12318
   Fujisawa T, 2017, NAT REV MOL CELL BIO, V18, P246, DOI 10.1038/nrm.2016.143
   Funato K, 2014, SCIENCE, V346, P1529, DOI 10.1126/science.1253799
   Gerlinger M, 2012, NEW ENGL J MED, V366, P883, DOI 10.1056/NEJMoa1113205
   Gong F., 2017, J CELL BIOL
   Gong FD, 2016, PLOS GENET, V12, DOI 10.1371/journal.pgen.1006272
   Gong FD, 2015, GENE DEV, V29, P197, DOI 10.1101/gad.252189.114
   Gong FD, 2013, MUTAT RES-FUND MOL M, V750, P23, DOI 10.1016/j.mrfmmm.2013.07.002
   Greer EL, 2012, NAT REV GENET, V13, P343, DOI 10.1038/nrg3173
   Gros L, 2003, CANCER RES, V63, P164
   Guendel I, 2010, PLOS ONE, V5, DOI 10.1371/journal.pone.0011379
   Hajdu I, 2011, P NATL ACAD SCI USA, V108, P13130, DOI 10.1073/pnas.1110081108
   Hamamoto R, 2015, NAT REV CANCER, V15, P110, DOI 10.1038/nrc3884
   Hartlerode AJ, 2012, PLOS ONE, V7, DOI 10.1371/journal.pone.0049211
   Hendriks IA, 2015, CELL REP, V10, P1778, DOI 10.1016/j.celrep.2015.02.033
   Heyer WD, 2010, ANNU REV GENET, V44, P113, DOI 10.1146/annurev-genet-051710-150955
   Hojfeldt JW, 2013, NAT REV DRUG DISCOV, V12, P917, DOI 10.1038/nrd4154
   Hsiao KY, 2013, J MOL CELL BIOL, V5, P157, DOI 10.1093/jmcb/mjs066
   Huang J, 2008, CURR OPIN GENET DEV, V18, P152, DOI 10.1016/j.gde.2008.01.012
   Huang Y, 2006, SCIENCE, V312, P748, DOI 10.1126/science.1125162
   Huertas P, 2010, NAT STRUCT MOL BIOL, V17, P11, DOI 10.1038/nsmb.1710
   Hustedt N, 2017, NAT CELL BIOL, V19, P1, DOI 10.1038/ncb3452
   Huyen Y, 2004, NATURE, V432, P406, DOI 10.1038/nature03114
   Jackson SP, 2013, MOL CELL, V49, P795, DOI 10.1016/j.molcel.2013.01.017
   Jackson SP, 2009, NATURE, V461, P1071, DOI 10.1038/nature08467
   Jacquet K, 2016, MOL CELL, V62, P409, DOI 10.1016/j.molcel.2016.03.031
   Jeggo PA, 2016, NAT REV CANCER, V16, P35, DOI 10.1038/nrc.2015.4
   Jiricny J, 2006, NAT REV MOL CELL BIO, V7, P335, DOI 10.1038/nrm1907
   Johansson C, 2016, NAT CHEM BIOL, V12, P539, DOI [10.1038/NCHEMBIO.2087, 10.1038/nchembio.2087]
   Jorgensen S, 2007, J CELL BIOL, V179, P1337, DOI 10.1083/jcb.200706150
   Jorgensen S, 2013, NUCLEIC ACIDS RES, V41, P2797, DOI 10.1093/nar/gkt012
   Kachirskaia I, 2008, J BIOL CHEM, V283, P34660, DOI 10.1074/jbc.M806020200
   Kanu N, 2015, ONCOGENE, V34, P5699, DOI 10.1038/onc.2015.24
   Karkhanis V, 2012, J BIOL CHEM, V287, P29801, DOI 10.1074/jbc.M112.378281
   Khoury-Haddad H, 2014, P NATL ACAD SCI USA, V111, pE728, DOI 10.1073/pnas.1317585111
   Khurana S, 2014, CELL REP, V8, P1049, DOI 10.1016/j.celrep.2014.07.024
   Klose RJ, 2006, TRENDS BIOCHEM SCI, V31, P89, DOI 10.1016/j.tibs.2005.12.008
   Kooistra SM, 2012, NAT REV MOL CELL BIO, V13, P297, DOI 10.1038/nrm3327
   KORNBERG RD, 1974, SCIENCE, V184, P868, DOI 10.1126/science.184.4139.868
   Kouzarides T, 2002, CURR OPIN GENET DEV, V12, P198, DOI 10.1016/S0959-437X(02)00287-3
   Kouzarides T, 2007, CELL, V128, P693, DOI 10.1016/j.cell.2007.02.005
   Krivtsov AV, 2007, NAT REV CANCER, V7, P823, DOI 10.1038/nrc2253
   Lai AY, 2011, NAT REV CANCER, V11, P588, DOI 10.1038/nrc3091
   Lakin ND, 1999, ONCOGENE, V18, P7644, DOI 10.1038/sj.onc.1203015
   Lee J, 2008, NAT STRUCT MOL BIOL, V15, P109, DOI 10.1038/nsmb1326
   Lee SH, 2005, P NATL ACAD SCI USA, V102, P18075, DOI 10.1073/pnas.0503676102
   Li B, 2007, CELL, V128, P707, DOI 10.1016/j.cell.2007.01.015
   Li F, 2013, CELL, V153, P590, DOI 10.1016/j.cell.2013.03.025
   Li N, 2016, MOL CELL, V63, P470, DOI 10.1016/j.molcel.2016.06.035
   Li X, 2014, P NATL ACAD SCI USA, V111, P7096, DOI 10.1073/pnas.1324036111
   Lieber MR, 2010, ANNU REV BIOCHEM, V79, P181, DOI 10.1146/annurev.biochem.052308.093131
   Lin KY, 2017, CELL, V169, P183, DOI 10.1016/j.cell.2017.03.034
   Lord CJ, 2012, NATURE, V481, P287, DOI 10.1038/nature10760
   Lu C, 2016, SCIENCE, V352, P844, DOI 10.1126/science.aac7272
   Luijsterburg MS, 2011, MOL ONCOL, V5, P349, DOI 10.1016/j.molonc.2011.06.001
   Lukas J, 2011, NAT CELL BIOL, V13, P1161, DOI 10.1038/ncb2344
   Lundin C, 2005, NUCLEIC ACIDS RES, V33, P3799, DOI 10.1093/nar/gki681
   Mallette FA, 2012, EMBO J, V31, P1865, DOI 10.1038/emboj.2012.47
   Margueron R, 2010, NAT REV GENET, V11, P285, DOI 10.1038/nrg2752
   Marteijn JA, 2014, NAT REV MOL CELL BIO, V15, P465, DOI 10.1038/nrm3822
   Matheson CJ, 2016, TRENDS PHARMACOL SCI, V37, P872, DOI 10.1016/j.tips.2016.06.006
   Mattiroli F, 2012, CELL, V150, P1182, DOI 10.1016/j.cell.2012.08.005
   Miller KM, 2012, BIOCHEM SOC T, V40, P370, DOI 10.1042/BST20110747
   Miller KM, 2010, NAT STRUCT MOL BIOL, V17, P1144, DOI 10.1038/nsmb.1899
   Min JR, 2007, NAT STRUCT MOL BIOL, V14, P1229, DOI 10.1038/nsmb1340
   Morgan MA, 2015, GENE DEV, V29, P238, DOI 10.1101/gad.255182.114
   Mosammaparast N, 2013, J CELL BIOL, V203, P457, DOI 10.1083/jcb.201302092
   MURRAY K, 1964, BIOCHEMISTRY-US, V3, P10, DOI 10.1021/bi00889a003
   Musselman CA, 2012, NAT STRUCT MOL BIOL, V19, P1218, DOI 10.1038/nsmb.2436
   Nakamura K, 2011, MOL CELL, V41, P515, DOI 10.1016/j.molcel.2011.02.002
   Negrini S, 2010, NAT REV MOL CELL BIO, V11, P220, DOI 10.1038/nrm2858
   Nimura K, 2009, NATURE, V460, P287, DOI 10.1038/nature08086
   O'Connor MJ, 2015, MOL CELL, V60, P547, DOI 10.1016/j.molcel.2015.10.040
   O'Hagan HM, 2011, CANCER CELL, V20, P606, DOI 10.1016/j.ccr.2011.09.012
   O'Hagan HM, 2008, PLOS GENET, V4, DOI 10.1371/journal.pgen.1000155
   Oda H, 2010, MOL CELL, V40, P364, DOI 10.1016/j.molcel.2010.10.011
   Paik WK, 2007, TRENDS BIOCHEM SCI, V32, P146, DOI 10.1016/j.tibs.2007.01.006
   Panier S, 2014, NAT REV MOL CELL BIO, V15, P7, DOI 10.1038/nrm3719
   Pankotai T, 2012, NAT STRUCT MOL BIOL, V19, P276, DOI 10.1038/nsmb.2224
   Pei HD, 2011, NATURE, V470, P124, DOI 10.1038/nature09658
   Peng B, 2015, NUCLEIC ACIDS RES, V43, P5936, DOI 10.1093/nar/gkv528
   Peters AHFM, 2001, CELL, V107, P323, DOI 10.1016/S0092-8674(01)00542-6
   Pfister SX, 2015, CANCER CELL, V28, P557, DOI 10.1016/j.ccell.2015.09.015
   Pfister SX, 2014, CELL REP, V7, P2006, DOI 10.1016/j.celrep.2014.05.026
   Pfister SX, 2017, NAT REV DRUG DISCOV, V16, P241, DOI 10.1038/nrd.2016.256
   Polo SE, 2011, GENE DEV, V25, P409, DOI 10.1101/gad.2021311
   Polo SE, 2010, EMBO J, V29, P3130, DOI 10.1038/emboj.2010.188
   Rao RC, 2015, NAT REV CANCER, V15, P334, DOI 10.1038/nrc3929
   Rasmussen PB, 2014, EPIGENOMICS-UK, V6, P277, DOI [10.2217/epi.14.14, 10.2217/EPI.14.14]
   Reinhardt HC, 2012, TRENDS GENET, V28, P128, DOI 10.1016/j.tig.2011.12.002
   Rogakou EP, 1998, J BIOL CHEM, V273, P5858, DOI 10.1074/jbc.273.10.5858
   Ruthenburg AJ, 2007, NAT REV MOL CELL BIO, V8, P983, DOI 10.1038/nrm2298
   Santos MA, 2014, NATURE, V514, P107, DOI 10.1038/nature13483
   Schotta G, 2008, GENE DEV, V22, P2048, DOI 10.1101/gad.476008
   Schuhmacher MK, 2016, FEBS LETT, V590, P1713, DOI 10.1002/1873-3468.12216
   Schwartzentruber J, 2012, NATURE, V482, P226, DOI [10.1038/nature10833, 10.1007/s13311-012-0137-6]
   Schwertman P, 2016, NAT REV MOL CELL BIO, V17, P379, DOI 10.1038/nrm.2016.58
   Seiler DM, 2011, CHROMOSOME RES, V19, P883, DOI 10.1007/s10577-011-9244-1
   Shanbhag NM, 2010, CELL, V141, P970, DOI 10.1016/j.cell.2010.04.038
   Sharma SV, 2010, CELL, V141, P69, DOI 10.1016/j.cell.2010.02.027
   Shelton SB, 2016, PLOS GENET, V12, DOI 10.1371/journal.pgen.1006139
   Shen HJ, 2016, CELL, V165, P331, DOI 10.1016/j.cell.2016.02.064
   Shi YJ, 2004, CELL, V119, P941, DOI 10.1016/j.cell.2004.12.012
   Sone K, 2014, NAT COMMUN, V5, DOI 10.1038/ncomms6691
   Spruijt CG, 2016, CELL REP, V17, P783, DOI 10.1016/j.celrep.2016.09.037
   Stewart GS, 2009, CELL, V136, P420, DOI 10.1016/j.cell.2008.12.042
   Stucki M, 2005, CELL, V123, P1213, DOI 10.1016/j.cell.2005.09.038
   Suganuma T, 2011, ANNU REV BIOCHEM, V80, P473, DOI 10.1146/annurev-biochem-061809-175347
   Sun YL, 2009, NAT CELL BIOL, V11, P1376, DOI 10.1038/ncb1982
   Symington L.S., 2016, CRIT REV BIOCHEM MOL, V3, P1
   Takahashi A, 2012, MOL CELL, V45, P123, DOI 10.1016/j.molcel.2011.10.018
   Tang JB, 2013, NAT STRUCT MOL BIOL, V20, P317, DOI 10.1038/nsmb.2499
   Tessarz P, 2014, NAT REV MOL CELL BIO, V15, P703, DOI 10.1038/nrm3890
   Tsukada Y, 2006, NATURE, V439, P811, DOI 10.1038/nature04433
   van Haaften G, 2009, NAT GENET, V41, P521, DOI 10.1038/ng.349
   Verma P, 2016, GENE DEV, V30, P1138, DOI 10.1101/gad.280545.116
   Vinogradova M, 2016, NAT CHEM BIOL, V12, P531, DOI 10.1038/nchembio.2085
   Wagner EJ, 2012, NAT REV MOL CELL BIO, V13, P115, DOI 10.1038/nrm3274
   Wakeman TP, 2012, EMBO J, V31, P2169, DOI 10.1038/emboj.2012.50
   Walport LJ, 2016, NAT COMMUN, V7, DOI 10.1038/ncomms11974
   Watanabe S, 2013, NAT STRUCT MOL BIOL, V20, P1425, DOI 10.1038/nsmb.2702
   Weake VM, 2008, MOL CELL, V29, P653, DOI 10.1016/j.molcel.2008.02.014
   Weinberg D. N., 2017, COLD SPRING HARB PER, V7
   West LE, 2011, EPIGENOMICS-UK, V3, P361, DOI 10.2217/EPI.11.21
   Whetstine JR, 2006, CELL, V125, P467, DOI 10.1016/j.cell.2006.03.028
   Wu G, 2012, NAT GENET, V44, P251, DOI 10.1038/ng.1102
   Wysocki R, 2005, MOL CELL BIOL, V25, P8430, DOI 10.1128/MCB.25.19.8430-8443.2005
   Xiang Y, 2017, NATURE, V543, P573, DOI 10.1038/nature21671
   Yamane K, 2007, MOL CELL, V25, P801, DOI 10.1016/j.molcel.2007.03.001
   Yang S, 2016, GENE DEV, V30, P1611, DOI 10.1101/gad.284323.116
   Yang YZ, 2013, NAT REV CANCER, V13, P37, DOI 10.1038/nrc3409
   Young LC, 2013, J BIOL CHEM, V288, P21376, DOI 10.1074/jbc.M113.491514
   Zhang J, 2015, ONCOTARGET, V6, P2917, DOI 10.18632/oncotarget.2784
NR 187
TC 41
Z9 42
U1 8
U2 25
PU ELSEVIER
PI AMSTERDAM
PA RADARWEG 29, 1043 NX AMSTERDAM, NETHERLANDS
SN 1383-5742
EI 1388-2139
J9 MUTAT RES-REV MUTAT
JI Mutat. Res.-Rev. Mutat. Res.
PD APR-JUN
PY 2019
VL 780
BP 37
EP 47
DI 10.1016/j.mrrev.2017.09.003
PG 11
WC Biotechnology & Applied Microbiology; Genetics & Heredity; Toxicology
WE Science Citation Index Expanded (SCI-EXPANDED)
SC Biotechnology & Applied Microbiology; Genetics & Heredity; Toxicology
GA IS9YM
UT WOS:000482503800005
PM 31395347
OA Green Accepted
DA 2022-04-10
ER

PT J
AU Li, XZ
   Meng, YT
AF Li, Xiaozhi
   Meng, Yutong
TI SUMOylation Regulator-Related Molecules Can Be Used as Prognostic
   biomarkerss for Glioblastoma
SO FRONTIERS IN CELL AND DEVELOPMENTAL BIOLOGY
LA English
DT Article
DE glioblastoma; prognosis; SUMOylation; post-translational modification;
   risk assessment model
ID UBC9; SUMO; EXPRESSION; SURVIVAL; REQUIRES; RANGAP1; CELLS
AB Introduction SUMOylation is one of the post-translational modification. The relationship between the expression of SUMOylation regulators and the prognosis of glioblastoma is not quite clear. Materials and Methods The single nucleotide variant data, the transcriptome data, and survival information were acquired from The Cancer Genome Atlas, Gene Expression Omnibus, and cBioportal database. Wilcoxon test was used to analyze differentially expressed genes between glioblastoma and normal brain tissues. Gene set enrichment analysis was conducted to find the possible functions. One risk scoring model was built by the least absolute shrinkage and selection operator Cox regression. Kaplain-Meier survival curves and receiver operating characteristic curves were applied to evaluate the effectiveness of the model in predicting the prognosis of glioblastoma. Results Single-nucleotide variant mutations were found in SENP7, SENP3, SENP5, PIAS3, RANBP2, USPL1, SENP1, PIAS2, SENP2, and PIAS1. Moreover, UBE2I, UBA2, PIAS3, and SENP1 were highly expressed in glioblastoma, whereas PIAS1, RANBP2, SENP5, and SENP2 were downregulated in glioblastoma. Functional enrichment analysis showed that the SUMOylation regulators of glioblastoma might involve cell cycle, DNA replication, and other functions. A prognostic model of glioblastoma was constructed based on SUMOylation regulator-related molecules (ATF7IP, CCNB1IP1, and LBH). Kaplain-Meier survival curves and receiver operating characteristic curves showed that the model had a strong ability to predict the overall survival of glioblastoma. Conclusion This study analyzed the expression of 15 SUMOylation regulators in glioblastoma. The risk assessment model was constructed based on the SUMOylation regulator-related genes, which had a strong predictive ability for the overall survival of patients with glioblastoma. It might provide target for the study of the relationship between SUMOylation and glioblastoma.
C1 [Li, Xiaozhi] China Med Univ, Shengjing Hosp, Dept Neurosurg, Shenyang, Peoples R China.
   [Meng, Yutong] China Med Univ, Shengjing Hosp, Dept Stomatol, Shenyang, Peoples R China.
RP Meng, YT (corresponding author), China Med Univ, Shengjing Hosp, Dept Stomatol, Shenyang, Peoples R China.
EM mengyt@vip.163.com
FU 345 Talent Project
FX This study was supported by the 345 Talent Project.
CR Bellail AC, 2014, NAT COMMUN, V5, DOI 10.1038/ncomms5234
   Cloughesy TF, 2020, JAMA ONCOL, V6, P1939, DOI 10.1001/jamaoncol.2020.3161
   Eifler K, 2015, TRENDS BIOCHEM SCI, V40, P779, DOI 10.1016/j.tibs.2015.09.006
   Faria GM, 2020, BMC CANCER, V20, DOI 10.1186/s12885-020-06802-8
   Gao XY, 2019, EUR J PHARMACOL, V854, P179, DOI 10.1016/j.ejphar.2019.03.051
   Geiss-Friedlander R, 2007, NAT REV MOL CELL BIO, V8, P947, DOI 10.1038/nrm2293
   He XY, 2017, NAT CHEM BIOL, V13, P1164, DOI [10.1038/NCHEMBIO.2463, 10.1038/nchembio.2463]
   Johnson ES, 2004, ANNU REV BIOCHEM, V73, P355, DOI 10.1146/annurev.biochem.73.011303.074118
   Kelly AD, 2017, CURR OPIN GENET DEV, V42, P68, DOI 10.1016/j.gde.2017.03.015
   Liu XK, 2015, J HEMATOL ONCOL, V8, DOI 10.1186/s13045-015-0164-y
   Mahajan R, 1997, CELL, V88, P97, DOI 10.1016/S0092-8674(00)81862-0
   Matunis MJ, 1996, J CELL BIOL, V135, P1457, DOI 10.1083/jcb.135.6.1457
   Moschos SJ, 2010, HUM PATHOL, V41, P1286, DOI 10.1016/j.humpath.2010.02.007
   Ostrom QT, 2013, NEURO-ONCOLOGY, V15, P1, DOI 10.1093/neuonc/not151
   Reardon DA, 2020, JAMA ONCOL, V6, P1003, DOI 10.1001/jamaoncol.2020.1024
   Rodriguez MS, 2001, J BIOL CHEM, V276, P12654, DOI 10.1074/jbc.M009476200
   Samarzija I, 2021, BIOMOLECULES, V11, DOI 10.3390/biom11020247
   Sampson DA, 2001, J BIOL CHEM, V276, P21664, DOI 10.1074/jbc.M100006200
   Seeler JS, 2017, NAT REV CANCER, V17, P184, DOI 10.1038/nrc.2016.143
   Stupp R, 2009, LANCET ONCOL, V10, P459, DOI 10.1016/S1470-2045(09)70025-7
   Uddin Md Sahab, 2020, Semin Cancer Biol, DOI 10.1016/j.semcancer.2020.12.015
   Wang D, 2020, CLIN TRANSL MED, V10, DOI 10.1002/ctm2.168
   Wang LL, 2019, J MOL NEUROSCI, V69, P391, DOI 10.1007/s12031-019-01368-y
   Wang LM, 2004, ONCOL REP, V11, P1319
   Wu R, 2020, J BIOL CHEM, V295, P6741, DOI 10.1074/jbc.RA119.012338
   Wu YY, 2021, ADIPOCYTE, V10, P38, DOI 10.1080/21623945.2020.1863625
   Xia WR, 2016, GENE, V595, P175, DOI 10.1016/j.gene.2016.09.040
   Yang YF, 2018, MOL PHARMACOL, V94, P885, DOI 10.1124/mol.118.112300
   Yeh ETH, 2000, GENE, V248, P1, DOI 10.1016/S0378-1119(00)00139-6
   Zheng ZT, 2020, FRONT ONCOL, V10, DOI 10.3389/fonc.2020.542492
NR 30
TC 1
Z9 1
U1 0
U2 0
PU FRONTIERS MEDIA SA
PI LAUSANNE
PA AVENUE DU TRIBUNAL FEDERAL 34, LAUSANNE, CH-1015, SWITZERLAND
SN 2296-634X
J9 FRONT CELL DEV BIOL
JI Front. Cell. Dev. Biol.
PD APR 9
PY 2021
VL 9
AR 658856
DI 10.3389/fcell.2021.658856
PG 9
WC Cell Biology; Developmental Biology
WE Science Citation Index Expanded (SCI-EXPANDED)
SC Cell Biology; Developmental Biology
GA RQ6IH
UT WOS:000642519900001
PM 33898460
OA Green Published, gold
DA 2022-04-10
ER

PT J
AU Mott, JD
   Thomas, CL
   Rosenbach, MT
   Takahara, K
   Greenspan, DS
   Banda, MJ
AF Mott, JD
   Thomas, CL
   Rosenbach, MT
   Takahara, K
   Greenspan, DS
   Banda, MJ
TI Post-translational proteolytic processing of procollagen C-terminal
   proteinase enhancer releases a metalloproteinase inhibitor
SO JOURNAL OF BIOLOGICAL CHEMISTRY
LA English
DT Article
ID HUMAN TISSUE INHIBITOR; BONE MORPHOGENETIC PROTEIN-1; CAPILLARY
   ENDOTHELIAL-CELLS; ALPHA-1-PROTEINASE INHIBITOR; NEUTROPHIL
   CHEMOATTRACTANT; MATRIX METALLOPROTEINASES; EXPRESSION; TIMP-1;
   IDENTIFICATION; GLYCOPROTEIN
AB Activity of matrix metalloproteinases (MMP) is regulated by a family of proteins called tissue inhibitor of metalloproteinases (TIMP). Four TIMPs have been cloned, and their molecular weights range from 29,000 to 20,000. By reverse zymography, we have observed a metalloproteinase inhibitor with an apparent molecular weight of 16,500 from medium conditioned by human brain tumor cells. Antibodies directed against TIMPs failed to react with the 16,500 molecular weight inhibitor, indicating that it was not a truncated form of a known TIMP. The inhibitor was isolated from conditioned medium using affinity and ion exchange chromatography, N-terminal sequences of the inhibitor matched amino acid sequences within the C-terminal domain of a protein known as procollagen C-terminal proteinase enhancer (PCPE), Thus, the inhibitor was named CT-PCPE. Comparison of the N-terminal domain of TIMP with CT-PCPE revealed that both contained six cysteine residues. As in the case of TIMP, reduction and alkylation abolished the inhibitory activity of CT-PCPE. Purified CT-PCPE inhibited MMP-2 with an IC50 value much greater than that of TIMP-2, This implies that MMPs may not be the physiologic target for CT-PCPE inhibition. However, these results suggest that CT-PCPE may constitute a new class of metalloproteinase inhibitor.
C1 Univ Calif San Francisco, Dept Radiol, San Francisco, CA 94143 USA.
   Univ Wisconsin, Dept Pathol & Lab Med, Madison, WI 53706 USA.
   Univ Wisconsin, Dept Biomol Chem, Madison, WI 53706 USA.
RP Mott, JD (corresponding author), Lawrence Berkeley Nat Lab, Mail Stop 74-157, Berkeley, CA 94720 USA.
OI Greenspan, Daniel/0000-0001-8096-7446; Thomas-Virnig,
   Christina/0000-0002-8179-7749
FU NATIONAL INSTITUTE OF ARTHRITIS AND MUSCULOSKELETAL AND SKIN
   DISEASESUnited States Department of Health & Human ServicesNational
   Institutes of Health (NIH) - USANIH National Institute of Arthritis &
   Musculoskeletal & Skin Diseases (NIAMS) [R01AR043621] Funding Source:
   NIH RePORTER; NATIONAL INSTITUTE OF ENVIRONMENTAL HEALTH SCIENCESUnited
   States Department of Health & Human ServicesNational Institutes of
   Health (NIH) - USANIH National Institute of Environmental Health
   Sciences (NIEHS) [T32ES007106] Funding Source: NIH RePORTER; NIAMS NIH
   HHSUnited States Department of Health & Human ServicesNational
   Institutes of Health (NIH) - USANIH National Institute of Arthritis &
   Musculoskeletal & Skin Diseases (NIAMS) [AR43621] Funding Source:
   Medline; NIEHS NIH HHSUnited States Department of Health & Human
   ServicesNational Institutes of Health (NIH) - USANIH National Institute
   of Environmental Health Sciences (NIEHS) [T32-ES07106] Funding Source:
   Medline; NIGMS NIH HHSUnited States Department of Health & Human
   ServicesNational Institutes of Health (NIH) - USANIH National Institute
   of General Medical Sciences (NIGMS) [GM46846] Funding Source: Medline
CR ADAR R, 1986, COLLAGEN REL RES, V6, P267
   Amour A, 1998, FEBS LETT, V435, P39, DOI 10.1016/S0014-5793(98)01031-X
   APODACA G, 1990, CANCER RES, V50, P2322
   APTE SS, 1994, GENOMICS, V19, P86, DOI 10.1006/geno.1994.1016
   Arner EC, 1999, J BIOL CHEM, V274, P6594, DOI 10.1074/jbc.274.10.6594
   BANDA MJ, 1988, J EXP MED, V167, P1608, DOI 10.1084/jem.167.5.1608
   BANDA MJ, 1988, J BIOL CHEM, V263, P4481
   Banyai L, 1999, PROTEIN SCI, V8, P1636, DOI 10.1110/ps.8.8.1636
   BARNES WM, 1994, P NATL ACAD SCI USA, V91, P2216, DOI 10.1073/pnas.91.6.2216
   Borland G, 1999, J BIOL CHEM, V274, P2810, DOI 10.1074/jbc.274.5.2810
   Caterina NCM, 1997, J BIOL CHEM, V272, P32141, DOI 10.1074/jbc.272.51.32141
   CHANG S, 1994, P NATL ACAD SCI USA, V91, P5695
   GOLDBERG GI, 1992, J BIOL CHEM, V267, P4583
   Gomez DE, 1997, EUR J CELL BIOL, V74, P111
   GomisRuth FX, 1997, NATURE, V389, P77, DOI 10.1038/37995
   Greene J, 1996, J BIOL CHEM, V271, P30375, DOI 10.1074/jbc.271.48.30375
   HERRON GS, 1986, J BIOL CHEM, V261, P2814
   HERRON GS, 1986, J BIOL CHEM, V261, P2810
   HOWARD EW, 1991, J BIOL CHEM, V266, P17972
   HOWARD EW, 1991, J BIOL CHEM, V266, P13064
   Huang W, 1997, J BIOL CHEM, V272, P22086, DOI 10.1074/jbc.272.35.22086
   Hulmes DJS, 1997, MATRIX BIOL, V16, P41, DOI 10.1016/S0945-053X(97)90115-3
   KESSLER E, 1989, EUR J BIOCHEM, V186, P115, DOI 10.1111/j.1432-1033.1989.tb15184.x
   KESSLER E, 1990, BIOCHEM BIOPH RES CO, V173, P81, DOI 10.1016/S0006-291X(05)81024-1
   Kessler E, 1996, SCIENCE, V271, P360, DOI 10.1126/science.271.5247.360
   LAEMMLI UK, 1970, NATURE, V227, P680, DOI 10.1038/227680a0
   Lee SB, 1997, J BIOL CHEM, V272, P19059, DOI 10.1074/jbc.272.30.19059
   LUI YE, 1997, J BIOL CHEM, V272, P20479
   Marques G, 1997, CELL, V91, P417, DOI 10.1016/S0092-8674(00)80425-0
   MATSUDAIRA P, 1987, J BIOL CHEM, V262, P10035
   Matsuzawa K, 1996, J NEUROPATH EXP NEUR, V55, P88, DOI 10.1097/00005072-199601000-00009
   MIYAZAKI K, 1993, J BIOL CHEM, V268, P14387
   MURPHY G, 1991, BIOCHEMISTRY-US, V30, P8097, DOI 10.1021/bi00247a001
   MURPHY G, 1995, METHOD ENZYMOL, V248, P496
   NAKANO A, 1995, J NEUROSURG, V83, P298, DOI 10.3171/jns.1995.83.2.0298
   OREILLY MS, 1994, CELL, V79, P315, DOI 10.1016/0092-8674(94)90200-3
   OReilly MS, 1997, CELL, V88, P277, DOI 10.1016/S0092-8674(00)81848-6
   Reddi AH, 1996, SCIENCE, V271, P463, DOI 10.1126/science.271.5248.463
   STETLERSTEVENSON WG, 1989, J BIOL CHEM, V264, P17374
   STOCKER W, 1995, PROTEIN SCI, V4, P823
   TAKAHARA K, 1994, J BIOL CHEM, V269, P32572
   TAKAHARA K, 1994, J BIOL CHEM, V269, P26280
   Tortorella MD, 1999, SCIENCE, V284, P1664, DOI 10.1126/science.284.5420.1664
   TOWBIN H, 1979, P NATL ACAD SCI USA, V76, P4350, DOI 10.1073/pnas.76.9.4350
NR 44
TC 94
Z9 96
U1 0
U2 0
PU AMER SOC BIOCHEMISTRY MOLECULAR BIOLOGY INC
PI BETHESDA
PA 9650 ROCKVILLE PIKE, BETHESDA, MD 20814 USA
SN 0021-9258
J9 J BIOL CHEM
JI J. Biol. Chem.
PD JAN 14
PY 2000
VL 275
IS 2
BP 1384
EP 1390
DI 10.1074/jbc.275.2.1384
PG 7
WC Biochemistry & Molecular Biology
WE Science Citation Index Expanded (SCI-EXPANDED)
SC Biochemistry & Molecular Biology
GA 275TQ
UT WOS:000084836600093
PM 10625689
OA hybrid
DA 2022-04-10
ER

PT J
AU Li, N
   Truong, S
   Nouri, M
   Moore, J
   Al Nakouzi, N
   Lubik, AA
   Buttyan, R
AF Li, Na
   Truong, Sarah
   Nouri, Mannan
   Moore, Jackson
   Al Nakouzi, Nader
   Lubik, Amy Anne
   Buttyan, Ralph
TI Non-canonical activation of hedgehog in prostate cancer cells mediated
   by the interaction of transcriptionally active androgen receptor
   proteins with Gli3
SO ONCOGENE
LA English
DT Article
ID SIGNALING PATHWAY; PROLIFERATION; TARGET; STEROIDOGENESIS; INTERFERENCE;
   DEGRADATION; mechanism; PROTEASOME; RESISTANCE; PROMOTER
AB Hedgehog (Hh) is an oncogenic signaling pathway that regulates the activity of Gli transcription factor. Canonical Hh is a Smoothened-(Smo-) driven process that alters the post-translational processing of Gli2/Gli3 proteins. Though evidence supports a role for Gli action in prostate cancer (PCa) cell growth and progression, there is little indication that Smo is involved. Here we describe a non-canonical means for activation of Gli transcription in PCa cells mediated by the binding of transcriptionally-active androgen receptors (ARs) to Gli3. Androgens stimulated reporter expression from a Gli-dependent promoter in a variety of AR + PCa cells and this activity was suppressed by an anti-androgen, Enz, or by AR knockdown. Androgens also upregulated expression of endogenous Gli-dependent genes. This activity was associated with increased intranuclear binding of Gli3 to AR that was antagonized by Enz. Fine mapping of the AR binding domain on Gli2 showed that AR recognizes the Gli protein processing domain (PPD) in the C-terminus. Mutations in the arginine-/serine repeat elements of the Gli2 PPD involved in phosphorylation and ubiquitinylation blocked the binding to AR. beta-TrCP, a ubiquitinationligase that recognizes the Gli PPD, competed with AR for binding to this site. AR binding to Gli3 suppressed its proteolytic processing to the Gli3 repressor form (Gli3R) whereas AR knockdown increased Gli3R. Both full-length and truncated ARs were able to activate Gli transcription. Finally, we found that an ARbinding decoy polypeptide derived from the Gli2 Cterminus can compete with Gli3 for binding to AR. Exogenous overexpression of this decoy suppressed Gli transcriptional activity in PCa cells. Collectively, this work identifies a novel pathway for non-canonical activation of Hh signaling in PCa cells and identifies a means for interference that may have clinical relevance for PCa patients.
C1 [Li, Na; Truong, Sarah; Moore, Jackson; Al Nakouzi, Nader; Lubik, Amy Anne] Vancouver Prostate Ctr, Vancouver, BC, Canada.
   [Truong, Sarah; Nouri, Mannan; Buttyan, Ralph] Univ British Columbia, Interdisciplinary Oncol Program, Vancouver, BC, Canada.
   [Buttyan, Ralph] Univ British Columbia, Urol Sci, Vancouver, BC, Canada.
RP Buttyan, R (corresponding author), Univ British Columbia, Interdisciplinary Oncol Program, Vancouver, BC, Canada.; Buttyan, R (corresponding author), Univ British Columbia, Urol Sci, Vancouver, BC, Canada.
EM rbuttyan@prostatecentre.com
OI Nouri, Mannan/0000-0002-7442-9251
FU Canadian Institutes of Health ResearchCanadian Institutes of Health
   Research (CIHR) [CIHR258931]; Prostate Cancer Canada-Movember Team
   [T2103]; US Department of DefenseUnited States Department of Defense
   [PCRP W81XWH-10-1-0493]; Terry Fox Research Institute New Frontiers [PPG
   1062]
FX The authors acknowledge the helpful assistance of Dr Mengqian Chen of
   the South Carolina School of Pharmacy in the generation of the human
   Gli3 expression vector. Sources of Support: Canadian Institutes of
   Health Research (CIHR258931); Prostate Cancer Canada-Movember Team
   T2103; US Department of Defense PCRP W81XWH-10-1-0493; Terry Fox
   Research Institute New Frontiers PPG 1062.
CR Agathocleous M, 2007, CELL CYCLE, V6, P156, DOI 10.4161/cc.6.2.3745
   Altaba ARI, 2002, NAT REV NEUROSCI, V3, P24
   Briscoe J, 2013, NAT REV MOL CELL BIO, V14, P416, DOI 10.1038/nrm3598
   Chen MQ, 2010, MOL CANCER, V9, DOI 10.1186/1476-4598-9-89
   Chen M, 2009, CELL CYCLE, V8, P149, DOI 10.4161/cc.8.1.7532
   Dai P, 1999, J BIOL CHEM, V274, P8143, DOI 10.1074/jbc.274.12.8143
   Dehm SM, 2006, J CELL BIOCHEM, V99, P333, DOI 10.1002/jcb.20794
   Evangelista M, 2006, CLIN CANCER RES, V12, P5924, DOI 10.1158/1078-0432.CCR-06-1736
   Finco I, 2015, ANNU REV PHYSIOL, V77, P105, DOI 10.1146/annurev-physiol-061214-111754
   Han BC, 2015, CELL REP, V13, P1046, DOI 10.1016/j.celrep.2015.09.063
   Hui CC, 2011, ANNU REV CELL DEV BI, V27, P513, DOI 10.1146/annurev-cellbio-092910-154048
   Ikram MS, 2004, J INVEST DERMATOL, V122, P1503, DOI 10.1111/j.0022-202X.2004.22612.x
   Ingham PW, 2001, GENE DEV, V15, P3059, DOI 10.1101/gad.938601
   Jiang J, 2008, DEV CELL, V15, P801, DOI 10.1016/j.devcel.2008.11.010
   Karhadkar SS, 2004, NATURE, V431, P707, DOI 10.1038/nature02962
   Kasper M, 2006, EUR J CANCER, V42, P437, DOI 10.1016/j.ejca.2005.08.039
   Koebernick K, 2002, DIFFERENTIATION, V70, P69, DOI 10.1046/j.1432-0436.2002.700201.x
   Lauth M, 2007, CELL CYCLE, V6, P2458, DOI 10.4161/cc.6.20.4808
   Levina E, 2012, PROSTATE, V72, P817, DOI 10.1002/pros.21500
   Li N, 2014, PROSTATE, V74, P1400, DOI 10.1002/pros.22855
   Lubik AA, 2017, INT J CANCER, V140, P358, DOI 10.1002/ijc.30450
   Pan Y, 2007, J BIOL CHEM, V282, P10846, DOI 10.1074/jbc.M608599200
   Penning TM, 2015, J STEROID BIOCHEM, V153, P105, DOI 10.1016/j.jsbmb.2015.05.010
   Robbins DJ, 2012, SCI SIGNAL, V5, DOI 10.1126/scisignal.2002906
   Rubin LL, 2006, NAT REV DRUG DISCOV, V5, P1026, DOI 10.1038/nrd2086
   Ryan CJ, 2011, J CLIN ONCOL, V29, P3651, DOI 10.1200/JCO.2011.35.2005
   Sanchez P, 2004, P NATL ACAD SCI USA, V101, P12561, DOI 10.1073/pnas.0404956101
   Schrader EK, 2011, J BIOL CHEM, V286, P39051, DOI 10.1074/jbc.M111.274993
   Sirab N, 2012, INT J CANCER, V131, P1297, DOI 10.1002/ijc.27384
   Stecca B, 2005, TRENDS MOL MED, V11, P199, DOI 10.1016/j.molmed.2005.03.004
   Tickle C, 2013, WIRES DEV BIOL, V2, P275, DOI 10.1002/wdev.70
   Toftgard R, 2000, CELL MOL LIFE SCI, V57, P1720, DOI 10.1007/PL00000654
   Wang BW, 2006, P NATL ACAD SCI USA, V103, P33, DOI 10.1073/pnas.0509927103
   Ware KE, 2014, ENDOCR-RELAT CANCER, V21, pT87, DOI 10.1530/ERC-13-0470
   Wijgerde M, 2002, GENE DEV, V16, P2849, DOI 10.1101/gad.1025702
   Winklmayr M, 2010, BMC MOL BIOL, V11, DOI 10.1186/1471-2199-11-2
   Xavier GM, 2016, DEV BIOL, V415, P198, DOI 10.1016/j.ydbio.2016.02.009
   Yang L, 2010, ONCOGENE, V29, P469, DOI 10.1038/onc.2009.392
   Yuan X, 2014, ONCOGENE, V33, P2815, DOI 10.1038/onc.2013.235
   Zhou JC, 2016, CANCER LETT, V370, P313, DOI 10.1016/j.canlet.2015.11.006
   Zhou PB, 2000, MOL CELL, V6, P751, DOI 10.1016/S1097-2765(00)00074-5
   Zhu ML, 2010, FASEB J, V24, P769, DOI 10.1096/fj.09-136994
NR 42
TC 16
Z9 17
U1 0
U2 1
PU NATURE PUBLISHING GROUP
PI LONDON
PA MACMILLAN BUILDING, 4 CRINAN ST, LONDON N1 9XW, ENGLAND
SN 0950-9232
EI 1476-5594
J9 ONCOGENE
JI Oncogene
PD APR
PY 2018
VL 37
IS 17
BP 2313
EP 2325
DI 10.1038/s41388-017-0098-7
PG 13
WC Biochemistry & Molecular Biology; Oncology; Cell Biology; Genetics &
   Heredity
WE Science Citation Index Expanded (SCI-EXPANDED)
SC Biochemistry & Molecular Biology; Oncology; Cell Biology; Genetics &
   Heredity
GA GE3FW
UT WOS:000431100200008
PM 29429990
OA Green Published, hybrid
DA 2022-04-10
ER

PT J
AU Casati, L
   Sendra, R
   Sibilia, V
   Celotti, F
AF Casati, Lavinia
   Sendra, Ramon
   Sibilia, Valeria
   Celotti, Fabio
TI Endocrine disrupters: the new players able to affect the epigenome
SO FRONTIERS IN CELL AND DEVELOPMENTAL BIOLOGY
LA English
DT Review
DE epigenetic; endocrine disruptors; polychlorinated biphenyls; androgen
   receptor (AR); histone demethylases; Jarid1b
AB epigenetic represents the way by which the environment is able to program the genome; there are three main levels of epigenetic control on genome: DNA methylation, post-translational histone modification and microRNA expression. The term epigenetic has been widened by NIH to include "both heritable changes in gene activity and expression but also stable, long-term alterations in the transcriptional potential of a cell that are not necessarily heritable." These changes might be produced mostly by the early life environment and might affect health influencing the susceptibility to develop diseases, from cancer to mental disorder, during the entire life span. The most studied environmental influences acting on epigenome are diet, infections, wasting, child care, smoking and environmental pollutants, in particular endocrine disrupters (EDs). These are environmental xenobiotics able to interfere with the normal development of the male and female reproductive systems of wildlife, of experimental animals and possibly of humans, disrupting the normal reproductive functions. Data from literature indicate that EDs can act at different levels of epigenetic control, in some cases transgenerationally, in particular when the exposure to these compounds occurs during the prenatal and earliest period of life. Some of the best characterized EDs will be considered in this review. Among the EDs, vinclozolin (VZ), and methoxychlor (MXC) promote epigenetic transgenerational effects. Polychlorinated biphenils (PCBs), the most widespread environmental EDs, affect histone post-translational modification in a dimorphic way, possibly as the result of an alteration of gene expression of the enzymes involved in histone modification, as the demethylase Jarid1b, an enzyme also involved in regulating the interaction of androgens with their receptor.
C1 [Casati, Lavinia; Sibilia, Valeria] Univ Milan, Dept Med Biotechnol & Translat Med, Via Vanvitelli 32, I-20129 Milan, Italy.
   [Sendra, Ramon] Univ Valencia, Dept Bioquim & Biol Mol, Valencia, Spain.
   [Celotti, Fabio] Univ Milan, Dept Pharmacol & Biomol Sci, Milan, Italy.
RP Casati, L (corresponding author), Univ Milan, Dept Med Biotechnol & Translat Med, Via Vanvitelli 32, I-20129 Milan, Italy.
EM lavinia.casati@unimi.it
RI Sendra, Ramón/K-3549-2014
OI Sendra, Ramón/0000-0002-5519-4362; Casati, Lavinia/0000-0001-9044-6767
CR Ackerman CM, 2012, J ANDROL, V33, P210, DOI 10.2164/jandrol.111.013391
   Adkins NL, 2011, BIOCHEM CELL BIOL, V89, P1, DOI 10.1139/O10-112
   Anderson AM, 2012, PLOS ONE, V7, DOI [10.1371/journal.pone.0034158, 10.1371/journal.pone.0049576]
   Babar IA, 2008, FUTURE ONCOL, V4, P289, DOI 10.2217/14796694.4.2.289
   Baer C, 2013, CANCER RES, V73, P473, DOI 10.1158/0008-5472.CAN-12-3731
   Barua S, 2014, EPIGENET CHROMATIN, V7, DOI 10.1186/1756-8935-7-3
   Belzil VV, 2013, MOL CELL NEUROSCI, V56, P406, DOI 10.1016/j.mcn.2012.12.006
   Bird A, 2002, GENE DEV, V16, P6, DOI 10.1101/gad.947102
   Bjork C, 2013, REPROD TOXICOL, V35, P144, DOI 10.1016/j.reprotox.2012.10.010
   Bjork C, 2011, REPROD TOXICOL, V32, P293, DOI 10.1016/j.reprotox.2011.06.075
   Bonfanti P, 2014, ENVIRON TOXICOL, V29, P856, DOI 10.1002/tox.21812
   Buchanan G, 2004, HUM MOL GENET, V13, P1677, DOI 10.1093/hmg/ddh181
   Buck-Koehntop BA, 2013, epigenetic-US, V8, P131, DOI 10.4161/epi.23632
   Carthew RW, 2009, CELL, V136, P642, DOI 10.1016/j.cell.2009.01.035
   Casati L., 2010, BRASILIA MED, V48, P209
   Casati L., 2013, ENDOCRINE DISRUPTORS, V1, P4, DOI [10.4161/endo.27347, DOI 10.4161/ENDO.27347]
   Casati L, 2013, epigenetic-US, V8, P1061, DOI 10.4161/epi.25811
   Casati L, 2012, EPIGENOMICS-UK, V4, P101, DOI [10.2217/EPI.11.110, 10.2217/epi.11.110]
   Cedar H, 2009, NAT REV GENET, V10, P295, DOI 10.1038/nrg2540
   Cheung P, 2005, MOL ENDOCRINOL, V19, P563, DOI 10.1210/me.2004-0496
   Chi P, 2010, NAT REV CANCER, V10, P457, DOI 10.1038/nrc2876
   Clouaire T, 2008, CELL MOL LIFE SCI, V65, P1509, DOI 10.1007/s00018-008-7324-y
   Colciago A, 2006, REPROD TOXICOL, V22, P738, DOI 10.1016/j.reprotox.2006.07.002
   Colciago A, 2009, TOXICOL APPL PHARM, V239, P46, DOI 10.1016/j.taap.2009.04.023
   Crews D, 2012, P NATL ACAD SCI USA, V109, P9143, DOI 10.1073/pnas.1118514109
   Desaulniers D, 2009, INT J TOXICOL, V28, P294, DOI 10.1177/1091581809337918
   Dolinoy DC, 2006, ENVIRON HEALTH PERSP, V114, P567, DOI 10.1289/ehp.8700
   El Hajj N, 2014, REPRODUCTION, V148, pR111, DOI 10.1530/REP-14-0334
   Fang MZ, 2007, J NUTR, V137, p223S, DOI 10.1093/jn/137.1.223S
   Felsenfeld G, 2003, NATURE, V421, P448, DOI 10.1038/nature01411
   Fischle W, 2003, GENE DEV, V17, P1870, DOI 10.1101/gad.1110503
   Fleisch AF, 2012, J MOL ENDOCRINOL, V49, pR61, DOI 10.1530/JME-12-0066
   Foley DL, 2009, AM J EPIDEMIOL, V169, P389, DOI 10.1093/aje/kwn380
   Gao L, 2010, epigenetic-US, V5, P100, DOI 10.4161/epi.5.2.10778
   Gerhauser C, 2013, TOP CURR CHEM, V329, P73, DOI 10.1007/128_2012_360
   Guerrero-Bosagna C, 2013, PLOS ONE, V8, DOI 10.1371/journal.pone.0059922
   Guerrero-Bosagna C, 2012, REPROD TOXICOL, V34, P694, DOI 10.1016/j.reprotox.2012.09.005
   Heijmans BT, 2008, P NATL ACAD SCI USA, V105, P17046, DOI 10.1073/pnas.0806560105
   Hou LF, 2012, INT J EPIDEMIOL, V41, P79, DOI 10.1093/ije/dyr154
   Jennings BA, 2015, CANCER LETT, V356, P224, DOI 10.1016/j.canlet.2014.02.024
   Jensen TJ, 2008, CARCINOGENESIS, V29, P1500, DOI 10.1093/carcin/bgn102
   Kala Rishabh, 2013, J Clin Bioinforma, V3, P6, DOI 10.1186/2043-9113-3-6
   Kanherkar RR, 2014, FRONT CELL DEV BIOL, V2, DOI 10.3389/fcell.2014.00049
   Kollara A, 2010, J STEROID BIOCHEM, V118, P51, DOI 10.1016/j.jsbmb.2009.09.017
   Kulis M, 2010, ADV GENET, V70, P27, DOI [10.1016/B978-0-12-380866-0.60002-2, 10.1016/S0065-2660(10)70002-X]
   Lambrot R, 2013, NAT COMMUN, V4, DOI 10.1038/ncomms3889
   Leader JE, 2006, BIOCHEM PHARMACOL, V72, P1589, DOI 10.1016/j.bcp.2006.05.024
   LEE YW, 1995, MOL CELL BIOL, V15, P2547
   Leon-Olea M, 2014, GEN COMP ENDOCR, V203, P158, DOI 10.1016/j.ygcen.2014.02.005
   Leonard SS, 2004, MOL CELL BIOCHEM, V255, P3, DOI 10.1023/B:MCBI.0000007255.72746.a6
   Lewis BP, 2005, CELL, V120, P15, DOI 10.1016/j.cell.2004.12.035
   Lister R, 2009, NATURE, V462, P315, DOI 10.1038/nature08514
   Luger K, 1997, NATURE, V389, P251, DOI 10.1038/38444
   Manikkam M, 2014, PLOS ONE, V9, DOI 10.1371/journal.pone.0102091
   Marsit CJ, 2006, CANCER RES, V66, P10843, DOI 10.1158/0008-5472.CAN-06-1894
   McGowan PO, 2008, PLOS ONE, V3, DOI 10.1371/journal.pone.0002085
   McGowan PO, 2009, NAT NEUROSCI, V12, P342, DOI 10.1038/nn.2270
   Newbold RR, 2011, AM J CLIN NUTR, V94, p1939S, DOI 10.3945/ajcn.110.001057
   Patel DJ, 2013, ANNU REV BIOCHEM, V82, P81, DOI 10.1146/annurev-biochem-072711-165700
   Portigal CL, 2002, TOXICOL APPL PHARM, V179, P185, DOI 10.1006/taap.2002.9371
   Razin A, 1998, EMBO J, V17, P4905, DOI 10.1093/emboj/17.17.4905
   Reichard JF, 2007, BIOCHEM BIOPH RES CO, V352, P188, DOI 10.1016/j.bbrc.2006.11.001
   Reik W, 2001, SCIENCE, V293, P1089, DOI 10.1126/science.1063443
   Rivera CM, 2013, CELL, V155, P39, DOI 10.1016/j.cell.2013.09.011
   Sato K, 2009, ENDOCR J, V56, P131, DOI 10.1507/endocrj.K08E-239
   Schulz LC, 2010, P NATL ACAD SCI USA, V107, P16757, DOI 10.1073/pnas.1012911107
   Singh S, 2012, INT J MOL SCI, V13, P10143, DOI 10.3390/ijms130810143
   Skinner MK, 2013, PLOS ONE, V8, DOI 10.1371/journal.pone.0066318
   Skinner MK, 2010, DIFFERENTIATION, V80, P1, DOI 10.1016/j.diff.2010.02.003
   Stouder C, 2010, REPRODUCTION, V139, P373, DOI 10.1530/REP-09-0340
   Suganuma T, 2011, ANNU REV BIOCHEM, V80, P473, DOI 10.1146/annurev-biochem-061809-175347
   Suzuki E, 2009, P NATL ACAD SCI USA, V106, P3818, DOI 10.1073/pnas.0809819106
   Szyf M, 2009, BBA-GEN SUBJECTS, V1790, P878, DOI 10.1016/j.bbagen.2009.01.009
   Tabb MM, 2006, MOL ENDOCRINOL, V20, P475, DOI 10.1210/me.2004-0513
   Tobi EW, 2009, HUM MOL GENET, V18, P4046, DOI 10.1093/hmg/ddp353
   Tollefsbol TO, 2014, CANCER TREAT RES, V159, P257, DOI 10.1007/978-3-642-38007-5_15
   Vismara G, 2009, NEUROBIOL DIS, V33, P395, DOI 10.1016/j.nbd.2008.11.007
   Weaver ICG, 2004, ANN NY ACAD SCI, V1024, P182, DOI 10.1196/annals.1321.099
   Wilson VS, 2008, INT J ANDROL, V31, P178, DOI 10.1111/j.1365-2605.2007.00861.x
   Wong RLY, 2013, CLIN CANCER RES, V19, P3732, DOI 10.1158/1078-0432.CCR-13-0021
   Xiang Y, 2007, P NATL ACAD SCI USA, V104, P19226, DOI 10.1073/pnas.0700735104
   Zhang H, 2012, Cold Spring Harb Symp Quant Biol, V77, P161, DOI 10.1101/sqb.2012.77.014936
   Zhang XA, 2011, J MOL ENDOCRINOL, V46, pR11, DOI 10.1677/JME-10-0053
   Zhang YK, 2011, epigenetic-US, V6, P888, DOI 10.4161/epi.6.7.16315
   Zoroddu MA, 2010, DALTON T, V39, P787, DOI 10.1039/b916019c
NR 85
TC 50
Z9 53
U1 0
U2 10
PU FRONTIERS MEDIA SA
PI LAUSANNE
PA AVENUE DU TRIBUNAL FEDERAL 34, LAUSANNE, CH-1015, SWITZERLAND
SN 2296-634X
J9 FRONT CELL DEV BIOL
JI Front. Cell. Dev. Biol.
PD JUN 18
PY 2015
VL 3
AR 37
DI 10.3389/fcell.2015.00037
PG 9
WC Cell Biology; Developmental Biology
WE Science Citation Index Expanded (SCI-EXPANDED)
SC Cell Biology; Developmental Biology
GA VJ4KN
UT WOS:000595422300001
PM 26151052
OA Green Published, gold
DA 2022-04-10
ER

PT J
AU Dai, B
   Rasmussen, TP
AF Dai, Bo
   Rasmussen, Theodore P.
TI Global epiproteomic signatures distinguish embryonic stem cells from
   differentiated cells
SO STEM CELLS
LA English
DT Article
DE embryonic stem cells; chromatin; epigenetic; pluripotency; proteomics;
   epiproteomics; nucleosome; post-translational modification
ID HISTONE VARIANT MACROH2A; INACTIVE X-CHROMOSOME; CHROMATIN-STRUCTURE;
   CROSS-TALK; ACETYLATION; NUCLEAR; NUCLEOSOME; EXPRESSION; INDUCTION;
   CANCER
AB Complex organisms contain a variety of distinct cell types but only a single genome. Therefore, cellular identity must be specified by the developmentally regulated expression of a subset of genes from an otherwise static genome. In mammals, genomic DNA is modified by cytosine methylation, resulting in a pattern that is distinctive for each cell type ( the epigenome). Because nucleosomal histones are subject to a wide variety of post-translational modification ( PTMs), we reasoned that an analogous "epiproteome" might exist that could also be correlated with cellular identity. Here, we show that the quantitative evaluation of nucleosome PTMs yields epiproteomic signatures that are useful for the investigation of stem cell differentiation, chromatin function, cellular identity, and epigenetic responses to pharmacologic agents. We have developed a novel enzyme-linked immunosorbent assaybased method for the quantitative evaluation of the steady- state levels of PTMs and histone variants in preparations of native intact nucleosomes. We show that epiproteomic responses to the histone deacetylase inhibitor trichostatin A trigger changes in histone methylation as well as acetylation, and that the epiproteomic responses differ between mouse embryonic stem cells and mouse embryonic fibroblasts ( MEFs). ESCs subjected to retinoic acid-induced differentiation contain reconfigured nucleosomes that include increased content of the histone variant macroH2A and other changes. Furthermore, ESCs can be distinguished from embryonal carcinoma cells and MEFs based purely on their epiproteomic signatures. These results indicate that epiproteomic nucleosomal signatures are useful for the investigation of stem cell identity and differentiation, nuclear reprogramming, epigenetic regulation, chromatin dynamics, and assays for compounds with epigenetic activities.
C1 Univ Connecticut, Ctr Regenerat Biol, Storrs, CT 06269 USA.
   Univ Connecticut, Dept Anim Sci, Storrs, CT USA.
   Univ Connecticut, Dept Mol & Cell Biol, Storrs, CT USA.
RP Rasmussen, TP (corresponding author), Univ Connecticut, Ctr Regenerat Biol, Storrs, CT 06269 USA.
EM theodore.rasmussen@uconn.edu
RI DAI, BO/K-9023-2015
OI DAI, BO/0000-0001-7861-1344; Rasmussen, Theodore/0000-0001-9450-3394
FU NATIONAL INSTITUTE ON AGINGUnited States Department of Health & Human
   ServicesNational Institutes of Health (NIH) - USANIH National Institute
   on Aging (NIA) [R01AG023687] Funding Source: NIH RePORTER; NIA NIH
   HHSUnited States Department of Health & Human ServicesNational
   Institutes of Health (NIH) - USANIH National Institute on Aging (NIA)
   [R01AG023687] Funding Source: Medline
CR Ambrosi DJ, 2005, J CELL MOL MED, V9, P320, DOI 10.1111/j.1582-4934.2005.tb00358.x
   Angelov D, 2003, MOL CELL, V11, P1033, DOI 10.1016/S1097-2765(03)00100-X
   Bernstein BE, 2006, CELL, V125, P315, DOI 10.1016/j.cell.2006.02.041
   Bonaldi T, 2004, PROTEOMICS, V4, P1382, DOI 10.1002/pmic.200300743
   Campbell KHS, 1996, NATURE, V380, P64, DOI 10.1038/380064a0
   CONLON RA, 1992, DEVELOPMENT, V116, P357
   Costanzi C, 1998, NATURE, V393, P599, DOI 10.1038/31275
   Doyen CM, 2006, MOL CELL BIOL, V26, P1156, DOI 10.1128/MCB.26.3.1156-1164.2006
   Fischle W, 2003, CURR OPIN CELL BIOL, V15, P172, DOI 10.1016/S0955-0674(03)00013-9
   GOULD H, 1998, CHROMATIN PRACTICAL
   Hakelien AM, 2006, METH MOL B, V325, P99
   Hochedlinger K, 2006, NATURE, V441, P1061, DOI 10.1038/nature04955
   Jenuwein T, 2001, SCIENCE, V293, P1074, DOI 10.1126/science.1063127
   Lee JH, 2004, GENESIS, V38, P32, DOI 10.1002/gene.10250
   Lohnes D, 2003, BIOESSAYS, V25, P971, DOI 10.1002/bies.10340
   Ma YH, 2005, J CELL SCI, V118, P1607, DOI 10.1242/jcs.02291
   Meshorer E, 2006, DEV CELL, V10, P105, DOI 10.1016/j.devcel.2005.10.017
   Meshorer E, 2006, NAT REV MOL CELL BIO, V7, P540, DOI 10.1038/nrm1938
   Nightingale KP, 2007, J BIOL CHEM, V282, P4408, DOI 10.1074/jbc.M606773200
   Nusinow DA, 2007, J BIOL CHEM, V282, P12851, DOI 10.1074/jbc.M610502200
   Person MD, 2003, CHEM RES TOXICOL, V16, P598, DOI 10.1021/tx020109f
   Peterson CL, 2004, CURR BIOL, V14, pR546, DOI 10.1016/j.cub.2004.07.007
   Rasmussen Theodore P, 2003, Reprod Biol Endocrinol, V1, P100, DOI 10.1186/1477-7827-1-100
   Rasmussen TP, 2000, J CELL BIOL, V150, P1189, DOI 10.1083/jcb.150.5.1189
   Rasmussen TP, 2001, CHROMOSOMA, V110, P411, DOI 10.1007/s004120100158
   Rohwedel J, 1999, CELLS TISSUES ORGANS, V165, P190, DOI 10.1159/000016699
   Schneider R, 2002, TRENDS BIOCHEM SCI, V27, P396, DOI 10.1016/S0968-0004(02)02141-2
   Seligson DB, 2005, NATURE, V435, P1262, DOI 10.1038/nature03672
   Strahl BD, 2000, NATURE, V403, P41, DOI 10.1038/47412
   Takahashi K, 2006, CELL, V126, P663, DOI 10.1016/j.cell.2006.07.024
   Turner BM, 2005, NAT STRUCT MOL BIOL, V12, P110, DOI 10.1038/nsmb0205-110
   Turner BM, 2000, BIOESSAYS, V22, P836, DOI 10.1002/1521-1878(200009)22:9<836::AID-BIES9>3.0.CO;2-X
   Wilmut I, 1997, NATURE, V385, P810, DOI 10.1038/385810a0
   Wutz A, 2000, MOL CELL, V5, P695, DOI 10.1016/S1097-2765(00)80248-8
   YOSHIDA M, 1995, BIOESSAYS, V17, P423, DOI 10.1002/bies.950170510
NR 35
TC 64
Z9 65
U1 0
U2 11
PU WILEY
PI HOBOKEN
PA 111 RIVER ST, HOBOKEN 07030-5774, NJ USA
SN 1066-5099
EI 1549-4918
J9 STEM CELLS
JI Stem Cells
PY 2007
VL 25
IS 10
BP 2567
EP 2574
DI 10.1634/stemcells.2007-0131
PG 8
WC Cell & Tissue Engineering; Biotechnology & Applied Microbiology;
   Oncology; Cell Biology; Hematology
WE Science Citation Index Expanded (SCI-EXPANDED)
SC Cell Biology; Biotechnology & Applied Microbiology; Oncology; Hematology
GA 217DZ
UT WOS:000249929900019
PM 17641388
DA 2022-04-10
ER

PT J
AU Tomar, D
   Singh, R
AF Tomar, Dhanendra
   Singh, Rajesh
TI TRIM family proteins: emerging class of RING E3 ligases as regulator of
   NF-kappa B pathway
SO BIOLOGY OF THE CELL
LA English
DT Review
DE NF-B; RING E3 ligase; TRIM proteins; Ubiquitination; ubiquitinationE3
   ligases
ID COILED-COIL DOMAIN; FULL-LENGTH HUMAN; TRIPARTITE MOTIF; UBIQUITIN
   LIGASE; LINEAR UBIQUITINATION; TNF-ALPHA; signaling pathway;
   IMMUNE-RESPONSES; I INTERFERON; ZINC-FINGER
AB The nuclear factor B (NF-B) transcription factor family plays a key role in regulation of the inflammatory pathway in response to different physiological stimuli starting from development to ageing. The dysregulation of NF-B has been associated with many pathological conditions like inflammatory diseases, neurodegeneration, metabolic diseases and various kinds of malignancies. The NF-B pathway is regulated by number of post-translational modification, including phosphorylation and ubiquitination. ubiquitination(Ub) E3 ligases are key regulators of the process of ubiquitination and provide specificity to the pathway as they recognise the substrate and determine the topology of ubiquitination. TRIMs, members of RING family of Ub E3 ligases, are characterised by the presence of three conserved domains, RING, B-Box and coiled-coil (RBCC). Emerging evidence suggests that TRIMs regulate innate immune signalling during infection and different pathological conditions. The studies have demonstrated the role of TRIMs in regulation of inflammatory pathway including NF-B. Recent reports suggest that TRIMs play a critical role in regulation of the NF-B pathway by ubiquitinating proteins at different steps. In the current review, we discuss the role of TRIMs as novel NF-B regulators and their role in different pathophysiological conditions.
C1 [Tomar, Dhanendra] Indian Inst Adv Res, Sch Biol Sci & Biotechnol, Dept Cell Biol, Gandhinagar, India.
   [Singh, Rajesh] Maharaja Sayajirao Univ Baroda, Fac Sci, Dept Biochem, Vadodara 390002, Gujarat, India.
RP Singh, R (corresponding author), Maharaja Sayajirao Univ Baroda, Fac Sci, Dept Biochem, Vadodara 390002, Gujarat, India.
EM singhraj1975@gmail.com
RI Tomar, Dhanendra/H-3358-2019
OI Tomar, Dhanendra/0000-0002-3144-7257
FU Department of Biotechnology, Government of IndiaDepartment of
   Biotechnology (DBT) India [BT/PR13924/BRB/10/794/2010]; Council of
   Scientific and Industrial Research (CSIR), Government of IndiaCouncil of
   Scientific & Industrial Research (CSIR) - India; Indo-French Centre for
   the Promotion of Advanced Research (IFCPAR), New DelhiFrench National
   Research Agency (ANR)
FX The current research work on TRIM proteins is financially supported by
   the Department of Biotechnology, Government of India (grant number
   BT/PR13924/BRB/10/794/2010 to Rajesh Singh). Authors acknowledge the
   research fellowship from Council of Scientific and Industrial Research
   (CSIR), Government of India and the Indo-French Centre for the Promotion
   of Advanced Research (IFCPAR), New Delhi to Dhanendra Tomar.
CR Arimoto K, 2010, P NATL ACAD SCI USA, V107, P15856, DOI 10.1073/pnas.1004621107
   AUPHAN N, 1995, SCIENCE, V270, P286, DOI 10.1126/science.270.5234.286
   Avela K, 2000, NAT GENET, V25, P298, DOI 10.1038/77053
   Baker RG, 2011, CELL METAB, V13, P11, DOI 10.1016/j.cmet.2010.12.008
   Barr SD, 2008, PLOS PATHOG, V4, DOI 10.1371/journal.ppat.1000007
   Baud V, 2009, NAT REV DRUG DISCOV, V8, P33, DOI 10.1038/nrd2781
   Behrends C, 2011, NAT STRUCT MOL BIOL, V18, P520, DOI 10.1038/nsmb.2066
   Bell JL, 2012, PLOS ONE, V7, DOI 10.1371/journal.pone.0037470
   Ben-Neriah Y, 2002, NAT IMMUNOL, V3, P20, DOI 10.1038/ni0102-20
   BENCHETRIT E, 1988, J EXP MED, V167, P1560, DOI 10.1084/jem.167.5.1560
   Bernardi R, 2007, NAT REV MOL CELL BIO, V8, P1006, DOI 10.1038/nrm2277
   Berndsen CE, 2014, NAT STRUCT MOL BIOL, V21, P301, DOI 10.1038/nsmb.2780
   Bernot A, 1997, NAT GENET, V17, P25
   Borden KLB, 2000, J MOL BIOL, V295, P1103, DOI 10.1006/jmbi.1999.3429
   Borden KLB, 1996, P NATL ACAD SCI USA, V93, P1601, DOI 10.1073/pnas.93.4.1601
   Brass AL, 2008, SCIENCE, V319, P921, DOI 10.1126/science.1152725
   C elegans Sequencing Consortium, 1998, SCIENCE, V282, P2012, DOI 10.1126/science.282.5396.2012
   Caamano J, 2002, CLIN MICROBIOL REV, V15, P414, DOI 10.1128/CMR.15.3.414-429.2002
   Cai CX, 2009, NAT CELL BIOL, V11, P56, DOI 10.1038/ncb1812
   Cambiaghi V, 2012, ADV EXP MED BIOL, V770, P77
   Cao TY, 1997, J CELL SCI, V110, P1563
   Chae JJ, 2008, BLOOD, V112, P1794, DOI 10.1182/blood-2008-01-134932
   Chen JQ, 2013, CURR OPIN IMMUNOL, V25, P4, DOI 10.1016/j.coi.2012.12.005
   Chen ZJJ, 2012, IMMUNOL REV, V246, P95, DOI 10.1111/j.1600-065X.2012.01108.x
   Chen ZJJ, 2009, MOL CELL, V33, P275, DOI 10.1016/j.molcel.2009.01.014
   Chen ZJJ, 2005, NAT CELL BIOL, V7, P758, DOI 10.1038/ncb0805-758
   Christensen DE, 2007, NAT STRUCT MOL BIOL, V14, P941, DOI 10.1038/nsmb1295
   Chu Y, 2011, ONCOGENE, V30, P1108, DOI 10.1038/onc.2010.462
   D'Cruz AA, 2013, PROTEIN SCI, V22, P1, DOI 10.1002/pro.2185
   Deshaies RJ, 2009, ANNU REV BIOCHEM, V78, P399, DOI 10.1146/annurev.biochem.78.101807.093809
   DiDonato JA, 2012, IMMUNOL REV, V246, P379, DOI 10.1111/j.1600-065X.2012.01099.x
   dos Santos CC, 2004, PHYSIOL GENOMICS, V19, P331, DOI 10.1152/physiolgenomics.00153.2004
   Ea CK, 2006, MOL CELL, V22, P245, DOI 10.1016/j.molcel.2006.03.026
   Emmerich CH, 2011, SCI SIGNAL, V4, DOI 10.1126/scisignal.2002187
   Espinosa A, 2011, J BIOL CHEM, V286, P36478, DOI 10.1074/jbc.M111.241786
   Finley D, 2009, ANNU REV BIOCHEM, V78, P477, DOI 10.1146/annurev.biochem.78.081507.101607
   Fletcher AJ, 2013, CURR TOP MICROBIOL, V371, P29, DOI 10.1007/978-3-642-37765-5_2
   Freemont PS, 2000, CURR BIOL, V10, pR84, DOI 10.1016/S0960-9822(00)00287-6
   Frosk P, 2002, AM J HUM GENET, V70, P663, DOI 10.1086/339083
   Gack MU, 2007, NATURE, V446, P916, DOI 10.1038/nature05732
   Gilmore TD, 2006, ONCOGENE, V25, P6887, DOI 10.1038/sj.onc.1209982
   Grutter C, 2006, FEBS LETT, V580, P99, DOI 10.1016/j.febslet.2005.11.076
   Gyrd-Hansen M, 2010, NAT REV CANCER, V10, P561, DOI 10.1038/nrc2889
   Habelhah Hasem, 2010, Genes Cancer, V1, P735
   Hacker Hans, 2006, Sci STKE, V2006, pre13, DOI 10.1126/stke.3572006re13
   Haglund K, 2005, EMBO J, V24, P3353, DOI 10.1038/sj.emboj.7600808
   Hamalainen Riikka H, 2004, Hum Mutat, V23, P522, DOI 10.1002/humu.9233
   Hanada T, 2002, CYTOKINE GROWTH F R, V13, P413, DOI 10.1016/S1359-6101(02)00026-6
   Hayakawa M, 2012, J BIOCHEM, V151, P115, DOI 10.1093/jb/mvr139
   Hayden MS, 2012, GENE DEV, V26, P203, DOI 10.1101/gad.183434.111
   Hayden MS, 2004, GENE DEV, V18, P2195, DOI 10.1101/gad.1228704
   Herquel B, 2011, TRANSCR-AUSTIN, V2, P231, DOI 10.4161/trns.2.5.17725
   Hicke L, 2001, NAT REV MOL CELL BIO, V2, P195, DOI 10.1038/35056583
   Hillje AL, 2013, CELL DEATH DIS, V4, DOI 10.1038/cddis.2013.487
   Hiscott J, 2003, ANN NY ACAD SCI, V1010, P237, DOI 10.1196/annals.1299.042
   Hu MM, 2014, P NATL ACAD SCI USA, V111, P1509, DOI 10.1073/pnas.1318227111
   Ikeda K, 2012, ADV EXP MED BIOL, V770, P27
   Israel A, 2010, CSH PERSPECT BIOL, V2, DOI 10.1101/cshperspect.a000158
   Iwai K, 2012, TRENDS CELL BIOL, V22, P355, DOI 10.1016/j.tcb.2012.04.001
   Iwai K, 2009, EMBO REP, V10, P706, DOI 10.1038/embor.2009.144
   Joazeiro CAP, 2000, CELL, V102, P549, DOI 10.1016/S0092-8674(00)00077-5
   Jung T, 2009, MOL ASPECTS MED, V30, P191, DOI 10.1016/j.mam.2009.04.001
   Kapanadze B, 1998, FEBS LETT, V426, P266, DOI 10.1016/S0014-5793(98)00357-3
   Kawai T, 2011, EMBO MOL MED, V3, P513, DOI 10.1002/emmm.201100160
   Kim MJ, 2008, J VIROL, V82, P1474, DOI 10.1128/JVI.01650-07
   Komander D, 2012, ANNU REV BIOCHEM, V81, P203, DOI 10.1146/annurev-biochem-060310-170328
   Kondo T, 2012, BIOCHEM BIOPH RES CO, V422, P501, DOI 10.1016/j.bbrc.2012.05.028
   Kong HJ, 2007, J IMMUNOL, V179, P26, DOI 10.4049/jimmunol.179.1.26
   Konstantinova IM, 2008, INT REV CEL MOL BIO, V267, P59, DOI 10.1016/S1937-6448(08)00602-3
   Li Q, 2011, P NATL ACAD SCI USA, V108, P19341, DOI 10.1073/pnas.1110946108
   Li X, 2011, J BIOL CHEM, V286, P27959, DOI 10.1074/jbc.M111.260406
   Liu F, 2012, IMMUNOL REV, V246, P239, DOI 10.1111/j.1600-065X.2012.01107.x
   Liu Xin-lei, 2011, Zhonghua Shi Yan He Lin Chuang Bing Du Xue Za Zhi, V25, P60
   LOVERING R, 1993, P NATL ACAD SCI USA, V90, P2112, DOI 10.1073/pnas.90.6.2112
   Mandell MA, 2014, DEV CELL, V30, P394, DOI 10.1016/j.devcel.2014.06.013
   Marin I, 2012, PLOS ONE, V7, DOI 10.1371/journal.pone.0050030
   May MJ, 2004, J BIOL CHEM, V279, P45528, DOI 10.1074/jbc.M408579200
   Mercurio F, 1997, SCIENCE, V278, P860, DOI 10.1126/science.278.5339.860
   Meroni G, 2012, ADV EXP MED BIOL, V770, P1
   Metzger MB, 2014, BBA-MOL CELL RES, V1843, P47, DOI 10.1016/j.bbamcr.2013.05.026
   Micale L, 2012, ADV EXP MED BIOL, V770, P11
   Miyajima N, 2009, BIOCHEM BIOPH RES CO, V381, P383, DOI 10.1016/j.bbrc.2009.02.059
   Miyamoto K, 2002, EUR J BIOCHEM, V269, P6152, DOI 10.1046/j.1432-1033.2002.03332.x
   Mosesson Y, 2009, DEV CELL, V16, P687, DOI 10.1016/j.devcel.2009.03.015
   Nakayama EE, 2010, REV MED VIROL, V20, P77, DOI 10.1002/rmv.637
   Napolitano LM, 2012, IUBMB LIFE, V64, P64, DOI 10.1002/iub.580
   Niederberger E, 2008, FASEB J, V22, P3432, DOI 10.1096/fj.08-109355
   Niida M, 2010, MOL IMMUNOL, V47, P2378, DOI 10.1016/j.molimm.2010.05.004
   Noguchi K, 2011, CARCINOGENESIS, V32, P995, DOI 10.1093/carcin/bgr068
   O'Dea E, 2009, WIRES SYST BIOL MED, V1, P107, DOI 10.1002/wsbm.30
   Oeckinghaus A, 2009, CSH PERSPECT BIOL, V1, DOI 10.1101/cshperspect.a000034
   Oke V, 2012, J AUTOIMMUN, V39, P77, DOI 10.1016/j.jaut.2012.01.014
   Ota T, 2004, NAT GENET, V36, P40, DOI 10.1038/ng1285
   Ozato K, 2008, NAT REV IMMUNOL, V8, P849, DOI 10.1038/nri2413
   Peng HZ, 2000, J MOL BIOL, V295, P1139, DOI 10.1006/jmbi.1999.3402
   Perera S, 2012, J MUSCLE RES CELL M, V33, P107, DOI 10.1007/s10974-012-9288-7
   Perfetto L, 2013, TRENDS BIOCHEM SCI, V38, P38, DOI 10.1016/j.tibs.2012.10.001
   Perkins ND, 2012, NAT REV CANCER, V12, P121, DOI 10.1038/nrc3204
   Petrera F, 2012, ADV EXP MED BIOL, V770, P131
   Pfeffer LM, 2011, J INTERF CYTOK RES, V31, P553, DOI 10.1089/jir.2011.0028
   Pickart CM, 2004, CURR OPIN CHEM BIOL, V8, P610, DOI 10.1016/j.cbpa.2004.09.009
   Poole E, 2009, J VIROL, V83, P3581, DOI 10.1128/JVI.02072-08
   Qiu Hui, 2013, Virologica Sinica, V28, P209, DOI 10.1007/s12250-013-3343-4
   Quaderi NA, 1997, NAT GENET, V17, P285, DOI 10.1038/ng1197-285
   Rahm N, 2012, CURR OPIN HIV AIDS, V7, P180, DOI 10.1097/COH.0b013e32835048e1
   Rajsbaum R, 2008, EUR J IMMUNOL, V38, P619, DOI 10.1002/eji.200737916
   REDDY BA, 1991, DEV BIOL, V148, P107, DOI 10.1016/0012-1606(91)90321-S
   REDDY BA, 1992, TRENDS BIOCHEM SCI, V17, P344, DOI 10.1016/0968-0004(92)90308-V
   Reymond A, 2001, EMBO J, V20, P2140, DOI 10.1093/emboj/20.9.2140
   Sanchez R, 2011, TRENDS BIOCHEM SCI, V36, P364, DOI 10.1016/j.tibs.2011.03.005
   Sato T, 2015, ONCOGENE, V34, P1280, DOI 10.1038/onc.2014.68
   Schwamborn J, 2003, BMC GENOMICS, V4, DOI 10.1186/1471-2164-4-46
   Schwamborn JC, 2009, CELL, V136, P913, DOI 10.1016/j.cell.2008.12.024
   Shi M, 2008, NAT IMMUNOL, V9, P369, DOI 10.1038/ni1577
   Shi MD, 2014, NAT COMMUN, V5, DOI 10.1038/ncomms5820
   Shibata M, 2012, BIOCHEM BIOPH RES CO, V423, P104, DOI 10.1016/j.bbrc.2012.05.090
   Shin DY, 2011, FEBS LETT, V585, P3959, DOI 10.1016/j.febslet.2011.11.002
   Short KM, 2006, J BIOL CHEM, V281, P8970, DOI 10.1074/jbc.M512755200
   Song B, 2009, CURR TOP MICROBIOL, V339, P47, DOI 10.1007/978-3-642-02175-6_3
   Strandberg L, 2008, J CLIN IMMUNOL, V28, P220, DOI 10.1007/s10875-007-9157-0
   Strausberg RL, 2002, P NATL ACAD SCI USA, V99, P16899, DOI 10.1073/pnas.242603899
   Streich FC, 2013, J BIOL CHEM, V288, P8209, DOI 10.1074/jbc.M113.451567
   Tanji K, 2010, NEUROBIOL DIS, V38, P210, DOI 10.1016/j.nbd.2010.01.007
   Tokunaga F, 2013, J BIOCHEM, V154, P313, DOI 10.1093/jb/mvt079
   Tokunaga F, 2012, ENDOCR J, V59, P641, DOI 10.1507/endocrj.EJ12-0148
   Tokunaga F, 2012, MICROBES INFECT, V14, P563, DOI 10.1016/j.micinf.2012.01.011
   Tomar D, 2014, CELL SIGNAL, V26, P2606, DOI 10.1016/j.cellsig.2014.08.008
   Tomar D, 2013, BBA-MOL CELL RES, V1833, P3134, DOI 10.1016/j.bbamcr.2013.08.021
   Tomar D, 2012, PLOS ONE, V7, DOI 10.1371/journal.pone.0048662
   Tomar D, 2012, BBA-MOL CELL RES, V1823, P316, DOI 10.1016/j.bbamcr.2011.11.015
   Toniato E, 2002, J BIOL CHEM, V277, P37315, DOI 10.1074/jbc.M205900200
   Uchil PD, 2008, PLOS PATHOG, V4, DOI 10.1371/journal.ppat.0040016
   Uchil PD, 2013, J VIROL, V87, P257, DOI 10.1128/JVI.01804-12
   van Wijk SJL, 2010, FASEB J, V24, P981, DOI 10.1096/fj.09-136259
   Verma R, 1997, MOL BIOL CELL, V8, P1427, DOI 10.1091/mbc.8.8.1427
   Versteeg GA, 2013, IMMUNITY, V38, P384, DOI 10.1016/j.immuni.2012.11.013
   Wertz IE, 2010, CSH PERSPECT BIOL, V2, DOI 10.1101/cshperspect.a003350
   Wong ET, 2009, CLIN SCI, V116, P451, DOI 10.1042/CS20080502
   Woo JS, 2006, MOL CELL, V24, P967, DOI 10.1016/j.molcel.2006.11.009
   Wu CJ, 2006, NAT CELL BIOL, V8, P398, DOI 10.1038/ncb1384
   Wu WS, 2003, J BIOL CHEM, V278, P12294, DOI 10.1074/jbc.M211849200
   Yan J, 2014, J MOL CELL BIOL, V6, P154, DOI 10.1093/jmcb/mju005
   Yarilina A, 2010, CURR DIR AUTOIMMUN, V11, P94, DOI 10.1159/000289199
   Ye YH, 2009, NAT REV MOL CELL BIO, V10, P755, DOI 10.1038/nrm2780
   Yin MJ, 1998, NATURE, V396, P77, DOI 10.1038/23948
   Yu SS, 2011, BIOCHEM BIOPH RES CO, V410, P247, DOI 10.1016/j.bbrc.2011.05.124
   Zha FK, 2006, J IMMUNOL, V176, P1072, DOI 10.4049/jimmunol.176.2.1072
   Zhao W, 2012, J IMMUNOL, V188, P2567, DOI 10.4049/jimmunol.1103255
NR 148
TC 59
Z9 65
U1 5
U2 30
PU WILEY
PI HOBOKEN
PA 111 RIVER ST, HOBOKEN 07030-5774, NJ USA
SN 0248-4900
EI 1768-322X
J9 BIOL CELL
JI Biol. Cell
PD JAN
PY 2015
VL 107
IS 1
BP 22
EP 40
DI 10.1111/boc.201400046
PG 19
WC Cell Biology
WE Science Citation Index Expanded (SCI-EXPANDED)
SC Cell Biology
GA AY1TX
UT WOS:000347376000002
PM 25319221
DA 2022-04-10
ER

PT J
AU Carperntieri, A
   Giangrande, C
   Pucci, P
   Amoresano, A
AF Carperntieri, Andrea
   Giangrande, Chiara
   Pucci, Piero
   Amoresano, Angela
TI Glycoproteome study in myocardial lesions serum by integrated mass
   spectrometry approach: preliminary insights
SO EUROPEAN JOURNAL OF MASS SPECTROMETRY
LA English
DT Article
DE human sera; glycoproteomics; mass spectrometry
ID GLYCOSYLATION PATTERNS; ALTERED GLYCOSYLATION; CANCER; GLYCOpeptide;
   DIAGNOSIS; PROTEINS
AB Bottom up proteomics requires efficient and selective pre-fractionation procedures to simplify the analysis of the enormous number of peptide resulting from the hydrolysis of a cellular extract enabling the detection, identification and the structural characterization of the post-translational modification. Glycosylation, a well-known post-translational modification, plays a key rote in the enormous complexity, and heterogeneity of the human blood serum proteome. Thereby, characterization of glycosylation from serum is a challenging task, even for the existing sophisticated analytical methodologies. Here we report a glycoproteomics study on the identification of even low abundant glycoproteins, including the localization of N-glycosylation sites and the glycan profiling in human sera from healthy and myocarditis affected donors. The strategy is simply based on proteolytic digestion of total serum proteins followed by a single enrichment step of glycopeptide on ConA Lectin affinity chromatography. Glycopeptide were then deglycosylated by PNGaseF treatment and nano-Liquid chromatography-electrospray ionization tandem mass spectrometry analyses of the free peptide provided the basis for both identification of the individual proteins and elucidation of their modification sites. Moreover, glycan profilings could be obtained by matrix-assisted laser desorption/ionization mass spectrometry analysis of the released oligosaccharides. Our data led to the identification of 68 different glycosylation sites within 49 different proteins. Moreover, the analyses carried out on glycans represent the first picture of a glycosylation pattern in myocardial lesions. As a whole, several differences in the glycosylation patterns from different sera were observed, thus indicating glycan profiting as a possible toot to discriminate among different diseases.
C1 [Carperntieri, Andrea; Giangrande, Chiara; Pucci, Piero; Amoresano, Angela] Univ Naples Federico II, Dept Chim Organ & Biochim, I-80126 Naples, Italy.
RP Carperntieri, A (corresponding author), Univ Naples Federico II, Dept Chim Organ & Biochim, Complesso Univ Monte S Angelo,Via Cynthia 4, I-80126 Naples, Italy.
EM angamor@unina.it
OI PUCCI, Pietro/0000-0002-5885-1495; Carpentieri,
   Andrea/0000-0002-1944-5355; AMORESANO, Angela/0000-0002-8386-655X;
   Giangrande, Chiara/0000-0002-0287-9958
FU INBB, Ministero dell'Universita' e delta Ricerca Scientifica; Rete
   Nazionale per lo studio della Proteomica Umana (Italian Human
   ProteomeNet) [RBRN07BMCT]; National Center of Excellence in Molecular
   Medicine (MIUR-Rome)Ministry of Education, Universities and Research
   (MIUR); Regional Center of Competence
FX This work was supported by grants from the INBB, Ministero
   dell'Universita' e delta Ricerca Scientifica (Progetti di Rilevante
   Interesse Nazionale 2006, 20071 and by the FIRB Project Rete Nazionale
   per lo studio della Proteomica Umana (Italian Human ProteomeNet)
   RBRN07BMCT. Support from the National Center of Excellence in Molecular
   Medicine (MIUR-Rome) and from the Regional Center of Competence (CRdC
   ATIBB, Regione Campania-Naples) is gratefully acknowledged.
CR Arnold JN, 2008, PROTEOMICS, V8, P3284, DOI 10.1002/pmic.200800163
   Bond MR, 2007, CURR OPIN CHEM BIOL, V11, P52, DOI 10.1016/j.cbpa.2006.11.032
   Dell A, 2001, SCIENCE, V291, P2351, DOI 10.1126/science.1058890
   Dube DH, 2005, NAT REV DRUG DISCOV, V4, P477, DOI 10.1038/nrd1751
   Geng M, 2001, J CHROMATOGR B, V752, P293, DOI 10.1016/S0378-4347(00)00550-8
   Granovsky M, 2000, NAT MED, V6, P306
   Harazono A, 2005, GLYCOBIOLOGY, V15, P447, DOI 10.1093/glycob/cwi033
   Harvey DJ, 1999, MASS SPECTROM REV, V18, P349, DOI 10.1002/(SICI)1098-2787(1999)18:6<349::AID-MAS1>3.0.CO;2-H
   Hashimoto S, 2004, CANCER-AM CANCER SOC, V101, P2825, DOI 10.1002/cncr.20713
   Kim YJ, 1997, GLYCOCONJUGATE J, V14, P569, DOI 10.1023/A:1018580324971
   Kremmer T, 2004, BIOMED CHROMATOGR, V18, P323, DOI 10.1002/bmc.324
   KRUSIUS T, 1976, FEBS LETT, V66, P86, DOI 10.1016/0014-5793(76)80591-1
   Lewandrowski U, 2006, MOL CELL PROTEOMICS, V5, P226, DOI 10.1074/mcp.M500324-MCP200
   Liu T, 2005, J PROTEOME RES, V4, P2070, DOI 10.1021/pr0502065
   Marshall R D, 1974, Biochem Soc Symp, P17
   Meldrum DR, 1998, AM J PHYSIOL-REG I, V274, pR577, DOI 10.1152/ajpregu.1998.274.3.R577
   OGATA S, 1975, J BIOCHEM-TOKYO, V8, P87
   Patwa TH, 2006, ANAL CHEM, V78, P6411, DOI 10.1021/ac060726z
   Qiu RQ, 2005, ANAL CHEM, V77, P7225, DOI 10.1021/ac050554q
   Renkonen J, 2002, AM J PATHOL, V161, P543, DOI 10.1016/S0002-9440(10)64210-1
   TAYLORPAPADIMITRIOU J, 1994, TRENDS BIOTECHNOL, V12, P227, DOI 10.1016/0167-7799(94)90121-X
   Ueda K, 2007, J PROTEOME RES, V6, P3475, DOI 10.1021/pr070103h
   Van Dijk W, 1998, TRENDS GLYCOSCI GLYC, V10, P235, DOI 10.4052/tigg.10.235
   Wakankar AA, 2006, J PHARM SCI-US, V95, P2321, DOI 10.1002/jps.20740
   Yang ZP, 2004, J CHROMATOGR A, V1053, P79, DOI 10.1016/j.chroma.2004.08.150
NR 25
TC 6
Z9 6
U1 0
U2 9
PU SAGE PUBLICATIONS LTD
PI LONDON
PA 1 OLIVERS YARD, 55 CITY ROAD, LONDON EC1Y 1SP, ENGLAND
SN 1469-0667
EI 1751-6838
J9 EUR J MASS SPECTROM
JI Eur. J. Mass Spectrom.
PY 2010
VL 16
IS 1
SI SI
BP 123
EP 149
DI 10.1255/ejms.1035
PG 27
WC Physics, Atomic, Molecular & Chemical; Spectroscopy
WE Science Citation Index Expanded (SCI-EXPANDED)
SC Physics; Spectroscopy
GA 552KY
UT WOS:000274290200012
PM 20065524
DA 2022-04-10
ER

PT J
AU Cal, S
   Quesada, V
   Llamazares, M
   Diaz-Perales, A
   Garabaya, C
   Lopez-Otin, C
AF Cal, S
   Quesada, V
   Llamazares, M
   Diaz-Perales, A
   Garabaya, C
   Lopez-Otin, C
TI Human polyserase-2, a novel enzyme with three tandem serine protease
   domains in a single polypeptide chain
SO JOURNAL OF BIOLOGICAL CHEMISTRY
LA English
DT Article
ID MOLECULAR-CLONING; MATRIX METALLOPROTEINASES; CONVERTING-ENZYME;
   OVIDUCTAL PROTEASE; MESSENGER-RNA; EXPRESSION; CANCER; EVOLUTION;
   SEQUENCE; GENOME
AB We have cloned a human cDNA encoding a new serine protease that has been called polyserase-2 ( polyserine protease-2) because it is the second identified human enzyme with several tandem serine protease domains in its amino acid sequence. The first serine protease domain contains all characteristic features of these enzymes, whereas the second and third domains lack one residue of the catalytic triad of serine proteases and are predicted to be catalytically inactive. This complex domain organization is also present in the sequences of mouse and rat polyserase-2 and resembles that of polyserase-1, which also contains three serine protease domains in its amino acid sequence. However, polyserase-2 lacks additional domains present in polyserase-1, including a type II transmembrane motif and a low-density lipoprotein receptor A module. Enzymatic analysis demonstrated that both full-length polyserase-2 and its first serine protease domain hydrolyzed synthetic peptide used for assaying serine proteases. Nevertheless, the activity of the isolated domain was greater than that of the entire protein, suggesting that the two catalytically inactive serine protease domains of polyserase-2 may modulate the activity of the first domain. Northern blot analysis showed that polyserase-2 is expressed in fetal kidney; adult skeletal muscle, liver, placenta, prostate, and heart; and tumor cell lines derived from lung and colon adenocarcinomas. Finally, analysis of post-translational processing mechanism of polyserase-2 revealed that, contrary to those affecting to the membrane-bound polyserase-1, this novel polyprotein is a secreted enzyme whose three protease domains remain as an integral part of a single polypeptide chain.
C1 Univ Oviedo, Inst Univ Oncol, Fac Med, Dept Bioquim & Biol Mol, E-33006 Oviedo, Spain.
RP Cal, S (corresponding author), Univ Oviedo, Inst Univ Oncol, Fac Med, Dept Bioquim & Biol Mol, E-33006 Oviedo, Spain.
EM santical@uniovi.es
RI Quesada, Víctor/ABC-5437-2020; Quesada, Víctor/B-6557-2014;
   Díaz-Perales, Araceli/D-8433-2016; López-Otín, Carlos/AAB-2106-2020
OI Quesada, Víctor/0000-0002-8398-3457; Quesada,
   Víctor/0000-0002-8398-3457; Díaz-Perales, Araceli/0000-0002-1093-3627;
   López-Otín, Carlos/0000-0001-6964-1904; Llamazares Prada,
   Maria/0000-0001-6559-9374
CR Bhagwandin VJ, 2003, J BIOL CHEM, V278, P3363, DOI 10.1074/jbc.M209353200
   Blasi F, 2002, NAT REV MOL CELL BIO, V3, P932, DOI 10.1038/nrm977
   Cal S, 2003, P NATL ACAD SCI USA, V100, P9185, DOI 10.1073/pnas.1633392100
   Disse S, 1999, AM J HUM GENET, V65, P1242, DOI 10.1086/302624
   Egeblad M, 2002, NAT REV CANCER, V2, P161, DOI 10.1038/nrc745
   EHLERS MRW, 1989, P NATL ACAD SCI USA, V86, P7741, DOI 10.1073/pnas.86.20.7741
   Gibbs RA, 2004, NATURE, V428, P493, DOI 10.1038/nature02426
   Hiyoshi M, 2002, DEV BIOL, V243, P176, DOI 10.1006/dbio.2001.0558
   Hooper JD, 2003, BIOCHEM J, V373, P689, DOI 10.1042/BJ20030390
   ICHIKAWA H, 1994, CANCER RES, V54, P2865
   Krem MM, 2000, TRENDS CARDIOVAS MED, V10, P171, DOI 10.1016/S1050-1738(00)00068-2
   Krem MM, 2001, EMBO J, V20, P3036, DOI 10.1093/emboj/20.12.3036
   Lin CY, 1999, J BIOL CHEM, V274, P18231, DOI 10.1074/jbc.274.26.18231
   Lindsay LL, 1999, P NATL ACAD SCI USA, V96, P11253, DOI 10.1073/pnas.96.20.11253
   Lindsay LL, 1999, BIOL REPROD, V60, P989, DOI 10.1095/biolreprod60.4.989
   Lopez-Otin C, 2002, NAT REV MOL CELL BIO, V3, P509, DOI 10.1038/nrm858
   Marino G, 2003, J BIOL CHEM, V278, P3671, DOI 10.1074/jbc.M208247200
   McCawley LJ, 2001, CURR OPIN CELL BIOL, V13, P534, DOI 10.1016/S0955-0674(00)00248-9
   Netzel-Arnett S, 2003, CANCER METAST REV, V22, P237, DOI 10.1023/A:1023003616848
   Novikova EG, 1999, J BIOL CHEM, V274, P28887, DOI 10.1074/jbc.274.41.28887
   Oberst MD, 2003, J BIOL CHEM, V278, P26773, DOI 10.1074/jbc.M304282200
   Overall CM, 2002, NAT REV CANCER, V2, P657, DOI 10.1038/nrc884
   Puente XS, 2004, GENOME RES, V14, P609, DOI 10.1101/gr.1946304
   Puente XS, 2003, NAT REV GENET, V4, P544, DOI 10.1038/nrg1111
   RABBITTS TH, 1993, NAT GENET, V4, P175, DOI 10.1038/ng0693-175
   Rawlings ND, 2004, NUCLEIC ACIDS RES, V32, pD160, DOI [10.1093/nar/gkh071, 10.1093/nar/gkp971]
   Roshy S, 2003, CANCER METAST REV, V22, P271, DOI 10.1023/A:1023007717757
   Ross J, 2003, GENE, V304, P117, DOI 10.1016/S0378-1119(02)01187-3
   Sidenius N, 2003, CANCER METAST REV, V22, P205, DOI 10.1023/A:1023099415940
   SOUBRIER F, 1988, P NATL ACAD SCI USA, V85, P9386, DOI 10.1073/pnas.85.24.9386
   Sternlicht MD, 2001, ANNU REV CELL DEV BI, V17, P463, DOI 10.1146/annurev.cellbio.17.1.463
   Stiburkova B, 2003, EUR J HUM GENET, V11, P145, DOI 10.1038/sj.ejhg.5200937
   Tomita H, 1999, AM J HUM GENET, V65, P1688, DOI 10.1086/302682
   Velasco G, 2002, J BIOL CHEM, V277, P37637, DOI 10.1074/jbc.M203007200
   Waterston RH, 2002, NATURE, V420, P520, DOI 10.1038/nature01262
   WEI L, 1992, J BIOL CHEM, V267, P13398
   Wong GW, 2004, J BIOL CHEM, V279, P2438, DOI 10.1074/jbc.M308209200
   Wong GW, 2001, J BIOL CHEM, V276, P49169, DOI 10.1074/jbc.M108677200
   YU JX, 1995, J BIOL CHEM, V270, P13483, DOI 10.1074/jbc.270.22.13483
NR 39
TC 17
Z9 21
U1 0
U2 3
PU AMER SOC BIOCHEMISTRY MOLECULAR BIOLOGY INC
PI BETHESDA
PA 9650 ROCKVILLE PIKE, BETHESDA, MD 20814-3996 USA
SN 0021-9258
J9 J BIOL CHEM
JI J. Biol. Chem.
PD JAN 21
PY 2005
VL 280
IS 3
BP 1953
EP 1961
DI 10.1074/jbc.M409139200
PG 9
WC Biochemistry & Molecular Biology
WE Science Citation Index Expanded (SCI-EXPANDED)
SC Biochemistry & Molecular Biology
GA 887YP
UT WOS:000226341700029
PM 15536082
OA hybrid, Green Published
DA 2022-04-10
ER

PT J
AU Kim, HJ
   Kim, HJ
   Jeong, JE
   Baek, JY
   Jeong, J
   Kim, S
   Kim, YM
   Kim, Y
   Nam, JH
   Huh, SH
   Seo, J
   Jin, BK
   Lee, KJ
AF Kim, Hee-Jung
   Kim, Hyun Jung
   Jeong, Jae-Eun
   Baek, Jeong Yeob
   Jeong, Jaeho
   Kim, Sun
   Kim, Young-Mee
   Kim, Youhwa
   Nam, Jin Han
   Huh, Sue Hee
   Seo, Jawon
   Jin, Byung Kwan
   Lee, Kong-Joo
TI N-Terminal Truncated UCH-L1 Prevents Parkinson's Disease Associated
   Damage
SO PLOS ONE
LA English
DT Article
ID COMPLEX-I DEFICIENCY; NIGROSTRIATAL DOPAMINERGIC-NEURONS; TRANSLATION
   START SITES; ALPHA-SYNUCLEIN; post-translational modification;
   ANTIOXIDATIVE STRESS; OXIDATIVE STRESS; NULL MICE; PGP 9.5; UBIQUITIN
AB ubiquitinationC-terminal hydrolase-L1 (UCH-L1) has been proposed as one of the Parkinson's disease (PD) related genes, but the possible molecular connection between UCH-L1 and PD is not well understood. In this study, we discovered an N-terminal 11 amino acid truncated variant UCH-L1 that we called NT-UCH-L1, in mouse brain tissue as well as in NCI-H157 lung cancer and SH-SY5Y neuroblastoma cell lines. In vivo experiments and hydrogen-deuterium exchange (HDX) with tandem mass spectrometry (MS) studies showed that NT-UCH-L1 is readily aggregated and degraded, and has more flexible structure than UCH-L1. post-translational modification including monoubiquitination and disulfide crosslinking regulate the stability and cellular localization of NT-UCH-L1, as confirmed by mutational and proteomic studies. Stable expression of NT-UCH-L1 decreases cellular ROS levels and protects cells from H2O2, rotenone and CCCP-induced cell death. NT-UCH-L1-expressing transgenic mice are less susceptible to degeneration of nigrostriatal dopaminergic neurons seen in the MPTP mouse model of PD, in comparison to control animals. These results suggest that NT-UCH-L1 may have the potential to prevent neural damage in diseases like PD.
C1 [Kim, Hee-Jung; Kim, Hyun Jung; Jeong, Jae-Eun; Jeong, Jaeho; Kim, Sun; Kim, Young-Mee; Kim, Youhwa; Seo, Jawon; Lee, Kong-Joo] Ewha Womans Univ, Coll Pharm, Grad Sch Pharmaceut Sci, Seoul, South Korea.
   [Baek, Jeong Yeob; Nam, Jin Han; Huh, Sue Hee; Jin, Byung Kwan] Kyung Hee Univ, Sch Med, Neurodegenerat Control Res Ctr, Dept Biochem & Mol Biol, Seoul, South Korea.
RP Jin, BK (corresponding author), Kyung Hee Univ, Sch Med, Neurodegenerat Control Res Ctr, Dept Biochem & Mol Biol, Seoul, South Korea.
EM bkjin@khu.ac.kr; kjl@ewha.ac.kr
OI Nam, Jinhan/0000-0003-4153-3711; Lee, Kong-Joo/0000-0001-7972-6020
FU Global Research Lab Program [2012K1A1A2045441]; Proteogenomics Research
   Program of the National Research Foundation of Korea
   [2012M3A9B90036680]; Brain Korea 21 projectMinistry of Education & Human
   Resources Development (MOEHRD), Republic of Korea; Ewha Womans
   University; Basic Science Research Program through the NRF - Ministry of
   Education, Science, and Technology [20090063274]; Ministry of Education
   [2013R1A1A2061412]
FX This work was supported by the Global Research Lab Program (No.
   2012K1A1A2045441), and the Proteogenomics Research Program (No.
   2012M3A9B90036680) of the National Research Foundation of Korea. Kim HJ,
   Kim HJ, Jeong JE, Kim S, Kim YM, Kim Y, and Seo J were supported by the
   Brain Korea 21 project. Kim HJ was supported by RP-Grant 2010 of Ewha
   Womans University. This work was also supported by the Basic Science
   Research Program through the NRF funded by the Ministry of Education,
   Science, and Technology (Grant 20090063274) and by the Ministry of
   Education (No. 2013R1A1A2061412. The funder's had no role in study
   design, data collection and analysis, decision to publish, or
   preparation of the manuscript.
CR Ardley HC, 2003, MOL BIOL CELL, V14, P4541, DOI 10.1091/mbc.E03-02-0078
   Bazykin GA, 2011, NUCLEIC ACIDS RES, V39, P567, DOI 10.1093/nar/gkq806
   Braak H, 2003, NEUROBIOL AGING, V24, P197, DOI 10.1016/S0197-4580(02)00065-9
   Callio J, 2005, J BIOL CHEM, V280, P18536, DOI 10.1074/jbc.M413224200
   Canet-Aviles RM, 2004, P NATL ACAD SCI USA, V101, P9103, DOI 10.1073/pnas.0402959101
   Casarejos MJ, 2006, J NEUROCHEM, V97, P934, DOI 10.1111/j.1471-4159.2006.03777.x
   Chung YC, 2011, NEUROPHARMACOLOGY, V60, P963, DOI 10.1016/j.neuropharm.2011.01.043
   Chung YC, 2010, J IMMUNOL, V185, P1230, DOI 10.4049/jimmunol.1000208
   Cookson MR, 2008, INT J CLIN EXP PATHO, V1, P217
   Das C, 2006, P NATL ACAD SCI USA, V103, P4675, DOI 10.1073/pnas.0510403103
   Dauer W, 2002, P NATL ACAD SCI USA, V99, P14524, DOI 10.1073/pnas.172514599
   Dawson TM, 2010, NEURON, V66, P646, DOI 10.1016/j.neuron.2010.04.034
   DAY INM, 1987, FEBS LETT, V210, P157, DOI 10.1016/0014-5793(87)81327-3
   Deng HX, 2006, P NATL ACAD SCI USA, V103, P7142, DOI 10.1073/pnas.0602046103
   Dull T, 1998, J VIROL, V72, P8463, DOI 10.1128/JVI.72.11.8463-8471.1998
   FORNO LS, 1969, J AM GERIATR SOC, V17, P557, DOI 10.1111/j.1532-5415.1969.tb01316.x
   Gandre S, 2003, MITOCHONDRION, V2, P245, DOI 10.1016/S1567-7249(02)00105-8
   Gautier CA, 2008, P NATL ACAD SCI USA, V105, P11364, DOI 10.1073/pnas.0802076105
   Goldberg AL, 2003, NATURE, V426, P895, DOI 10.1038/nature02263
   Goldberg MS, 2000, NAT CELL BIOL, V2, pE115, DOI 10.1038/35017124
   Ha NN, 2011, CELL STEM CELL, V8, P267, DOI 10.1016/j.stem.2011.01.013
   Hao LY, 2010, P NATL ACAD SCI USA, V107, P9747, DOI 10.1073/pnas.0911175107
   Hartl FU, 2009, NAT STRUCT MOL BIOL, V16, P574, DOI 10.1038/nsmb.1591
   HEIKKILA R, 1971, SCIENCE, V172, P1257, DOI 10.1126/science.172.3989.1257
   Hicke L, 2001, NAT REV MOL CELL BIO, V2, P195, DOI 10.1038/35056583
   Huh SH, 2011, J IMMUNOL, V187, P960, DOI 10.4049/jimmunol.1100009
   Iwata A, 2005, P NATL ACAD SCI USA, V102, P13135, DOI 10.1073/pnas.0505801102
   Jenner P, 2003, ANN NEUROL, V53, pS26, DOI 10.1002/ana.10483
   Jeong JH, 2011, MOL CELL PROTEOMICS, V10, DOI 10.1074/mcp.M110.000513
   Kabuta T, 2008, HUM MOL GENET, V17, P1482, DOI 10.1093/hmg/ddn037
   Kaipio K, 2005, BIOCHEM BIOPH RES CO, V337, P633, DOI 10.1016/j.bbrc.2005.09.093
   Kim HJ, 2009, ONCOGENE, V28, P117, DOI 10.1038/onc.2008.364
   Kim MS, 2013, ACTA CRYSTALLOGR D, V69, P669, DOI 10.1107/S0907444913001194
   Kochetov AV, 2008, BIOESSAYS, V30, P683, DOI 10.1002/bies.20771
   Koharudin LMI, 2010, P NATL ACAD SCI USA, V107, P6835, DOI 10.1073/pnas.1002295107
   Lee E, 2009, PLOS ONE, V4, DOI 10.1371/journal.pone.0007949
   Lee T, 2005, J MOL BIOL, V353, P600, DOI 10.1016/j.jmb.2005.08.029
   Leissring MA, 2004, BIOCHEM J, V383, P439, DOI 10.1042/BJ20041081
   Leroy E, 1998, NATURE, V395, P451, DOI 10.1038/26652
   Lotharius J, 2000, J BIOL CHEM, V275, P38581, DOI 10.1074/jbc.M005385200
   LOWE J, 1990, J PATHOL, V161, P153, DOI 10.1002/path.1711610210
   Mazzulli JR, 2011, CELL, V146, P37, DOI 10.1016/j.cell.2011.06.001
   Meray RK, 2007, J BIOL CHEM, V282, P10567, DOI 10.1074/jbc.M611153200
   Narendra D, 2008, J CELL BIOL, V183, P795, DOI 10.1083/jcb.200809125
   Osaka H, 2003, HUM MOL GENET, V12, P1945, DOI 10.1093/hmg/ddg211
   Oueslati A, 2010, PROG BRAIN RES, V183, P115, DOI 10.1016/S0079-6123(10)83007-9
   Parker WD, 2008, BRAIN RES, V1189, P215, DOI 10.1016/j.brainres.2007.10.061
   PARKER WD, 1989, ANN NEUROL, V26, P719, DOI 10.1002/ana.410260606
   Parkkinen L, 2005, NEUROPATHOLOGY, V25, P304, DOI 10.1111/j.1440-1789.2005.00644.x
   Perier C, 2003, TRENDS NEUROSCI, V26, P345, DOI 10.1016/S0166-2236(03)00144-9
   Powers ET, 2009, ANNU REV BIOCHEM, V78, P959, DOI 10.1146/annurev.biochem.052308.114844
   Richardson JR, 2005, TOXICOL SCI, V88, P193, DOI 10.1093/toxsci/kfi304
   Rosas SLB, 2001, CANCER LETT, V170, P73, DOI 10.1016/S0304-3835(01)00449-9
   Saito Y, 2004, J NEUROPATH EXP NEUR, V63, P742, DOI 10.1093/jnen/63.7.742
   SCHAPIRA AHV, 1989, LANCET, V1, P1269, DOI 10.1016/S0140-6736(89)92366-0
   SCHAPIRA AHV, 1990, J NEUROCHEM, V54, P823, DOI 10.1111/j.1471-4159.1990.tb02325.x
   Seo J, 2008, J PROTEOME RES, V7, P587, DOI 10.1021/pr700657y
   Shim JH, 2011, MITOCHONDRION
   SPECTOR A, 1978, P NATL ACAD SCI USA, V75, P3244, DOI 10.1073/pnas.75.7.3244
   Sunderland PA, 2004, BIOCHEM SOC T, V32, P614, DOI 10.1042/BST0320614
   Taira T, 2004, EMBO REP, V5, P213, DOI 10.1038/sj.embor.7400074
   Takahashi-Niki K, 2004, BIOCHEM BIOPH RES CO, V320, P389, DOI 10.1016/j.bbrc.2004.05.187
   Tanaka M, 2004, J BIOL CHEM, V279, P4625, DOI 10.1074/jbc.M310994200
   Tompkins MM, 1997, BRAIN RES, V775, P24, DOI 10.1016/S0006-8993(97)00874-3
   Tsika E, 2010, J NEUROSCI, V30, P3409, DOI 10.1523/JNEUROSCI.4977-09.2010
   Uversky VN, 2007, J NEUROCHEM, V103, P17, DOI 10.1111/j.1471-4159.2007.04764.x
   Valente EM, 2004, SCIENCE, V304, P1158, DOI 10.1126/science.1096284
   Vila M, 2003, NAT REV NEUROSCI, V4, P365, DOI 10.1038/nrn1100
   Vives-Bauza C, 2010, P NATL ACAD SCI USA, V107, P378, DOI 10.1073/pnas.0911187107
   WEST MJ, 1991, ANAT RECORD, V231, P482, DOI 10.1002/ar.1092310411
   WILKINSON KD, 1989, SCIENCE, V246, P670, DOI 10.1126/science.2530630
   Wilkinson KD, 1999, J MOL BIOL, V291, P1067
   Yang YF, 2006, P NATL ACAD SCI USA, V103, P10793, DOI 10.1073/pnas.0602493103
NR 73
TC 11
Z9 11
U1 0
U2 10
PU PUBLIC LIBRARY SCIENCE
PI SAN FRANCISCO
PA 1160 BATTERY STREET, STE 100, SAN FRANCISCO, CA 94111 USA
SN 1932-6203
J9 PLOS ONE
JI PLoS One
PD JUN 24
PY 2014
VL 9
IS 6
AR e99654
DI 10.1371/journal.pone.0099654
PG 17
WC Multidisciplinary Sciences
WE Science Citation Index Expanded (SCI-EXPANDED)
SC Science & Technology - Other Topics
GA AK7UT
UT WOS:000338633900013
PM 24959670
OA Green Published, Green Submitted, gold
DA 2022-04-10
ER

PT J
AU Jones, WK
   Brown, M
   Wilhide, M
   He, SW
   Ren, XP
AF Jones, WK
   Brown, M
   Wilhide, M
   He, SW
   Ren, XP
TI NF-kappa B in cardiovascular disease - Diverse and specific effects of a
   "general" transcription factor?
SO CARDIOVASCULAR TOXICOLOGY
LA English
DT Review
DE transcriptional network; NF-kappa B; signaling; gene regulation;
   transgenic models; ischemia; mathematical modeling; heart
ID NECROSIS-FACTOR-ALPHA; NITRIC-OXIDE SYNTHASE; SMOOTH-MUSCLE-CELLS;
   INDUCED CARDIOMYOCYTE HYPERTROPHY; signal transduction pathway; ACUTE
   MYOCARDIAL-INFARCTION; ADULT CARDIAC MYOCYTE; IN-VIVO TRANSFECTION;
   CIS-ELEMENT DECOY; P65 SUBUNIT
AB The transcription factor NF-kappa B regulates a wide variety of biological effects in diverse cell types and organs, particularly stress and adaptive responses. Recently, it has become recognized that NF-kappa B and its upstream regulator tumor necrosis factor (TNF)-alpha regulate specific antithetical effects. For instance, in the heart, NF-kappa B has been found to be required for development of late preconditioning against myocardial infarction and yet is critically involved in mediating cell death after ischemia/reperfusion injury. There remains a bias that NF-kappa B is a "general" transcription factor that is activated by a plethora of stimuli, including neurohormonal, pathophysiological, and stress stimuli, and affects regulation of numerous downstream genes. The question has become, how can such a "general" transcription factor be critically involved in mediating specific effects? An emerging hypothesis is that NF-kappa B is part of a complicated signaling network or web, and that different combinatorial interactions between various activated signaling pathway components produce specific outcomes. This idea is supported by the large number of interactions discovered in the past 14 years between NF-kappa B and other signaling pathway at multiple levels. Notwithstanding the complexities of signal-induced activation of NF-kappa B, since it is a transcription factor, specific effects of NF-kappa B activation must be underlain by the activation and/or suppression of distinct subsets of NF-kappa B-dependent genes. At this level, selectivity is conferred by the expression of specific NF-kappa B subunits, their post translational modifications, and by combinatorial interactions between NF-kappa B and other transcription factor and co-activators that form specific enhanceosome complexes in association with particular promoters. These enhanceosome complexes represent another level of signaling integration whereby the activities of multiple upstream pathway converge to impress a distinct pattern of gene expression upon the NF-kappa B-dependent transcriptional network.
   Understanding how the overall cellular signaling network translates NF-kappa B activation into the regulation of specific subsets of NF-kappa B-dependent genes will lead to a mechanistic understanding of how NF-kappa B mediates diverse and paradoxical biological effects. In addition to the experimental approaches that have been historically undertaken, modern proteomic, genomic, and computational modeling approaches need to be applied in an integrated manner to achieve a workable understanding of NF-kappa B regulation and the NF-kappa B-dependent transcriptional network. Since NF-kappa B is activated in association with disease and contributes functionally to pathophysiology, understanding the detailed mechanism by which the seemingly generalized activation of NF-kappa B results in specific effects will allow us to identify particular signaling modules, transcriptional co-factors, protein complexes, and the discrete sets of NF-kappa B-dependent genes involved in specific effects. Certain of these may prove to be even better therapeutic target than NF-kappa B, allowing us to block the injurious effects while preserving the potentially beneficial effects of adaptive signaling in the heart.
C1 Univ Cincinnati, Dept Pharmacol & Cell Biophys, Cincinnati, OH 45267 USA.
RP Jones, WK (corresponding author), Univ Cincinnati, Dept Pharmacol & Cell Biophys, 231 Albert Sabin Way ML0575, Cincinnati, OH 45267 USA.
EM joneswk@uc.edu
CR Abu-Amer Y, 1998, J BIOL CHEM, V273, P29417, DOI 10.1074/jbc.273.45.29417
   ARENZANASEISDEDOS F, 1995, MOL CELL BIOL, V15, P2689
   Arvelo MB, 2002, HEPATOLOGY, V35, P535, DOI 10.1053/jhep.2002.31309
   AUTIERI MV, 1995, BIOCHEM BIOPH RES CO, V213, P827, DOI 10.1006/bbrc.1995.2204
   BACUERLE PA, 1994, ANNU REV IMMUNOL, V12, P141
   Baldwin AS, 1996, ANNU REV IMMUNOL, V14, P649, DOI 10.1146/annurev.immunol.14.1.649
   BALLIGAND JL, 1994, J BIOL CHEM, V269, P27580
   Bauriedel G, 1999, CARDIOVASC RES, V41, P480, DOI 10.1016/S0008-6363(98)00318-6
   Bergmann MW, 2001, J MOL CELL CARDIOL, V33, P1223, DOI 10.1006/jmcc.2001.1385
   BIAGINI G, 1995, NEUROSCI LETT, V190, P212, DOI 10.1016/0304-3940(95)11529-6
   Bing RJ, 2001, CELL MOL LIFE SCI, V58, P351, DOI 10.1007/PL00000862
[truncated: 2,186,265 more chars]
